# Supplementary material
Source: PubMed Central journal article supplement (PMC5967407)
Supplement: NIHMS964674-supplement-supplement_1.pdf [file NIHMS964674-supplement-supplement_1.pdf]

Suppl. Fig. S1

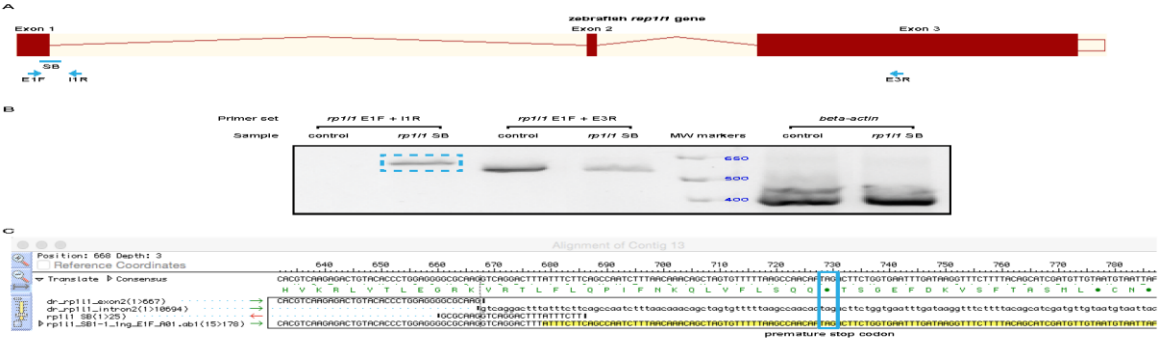

Figure S1

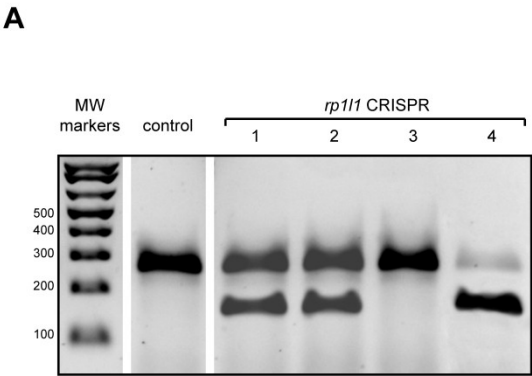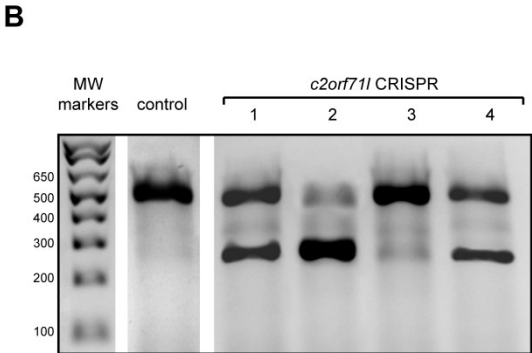

Figure S2

Suppl. Fig. S3

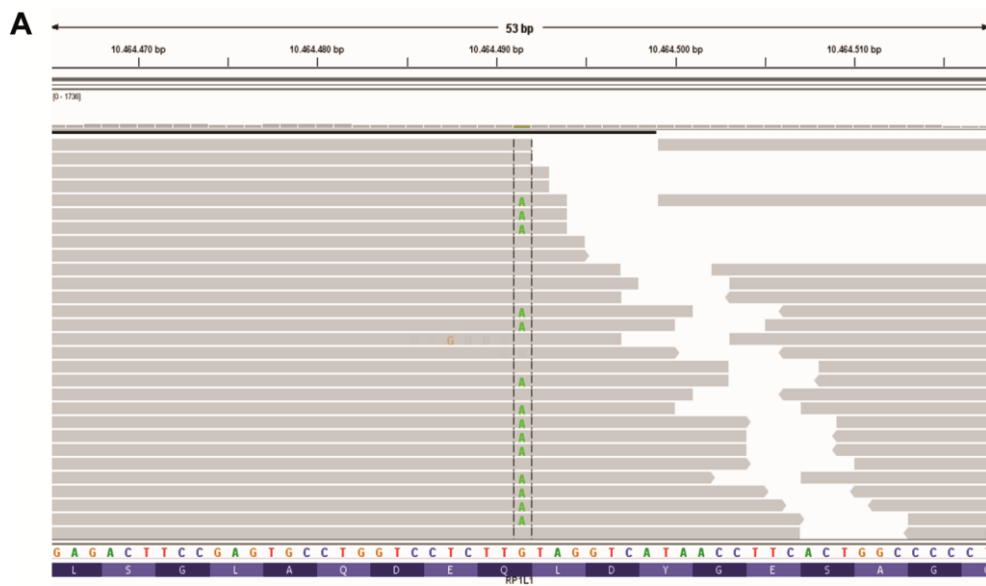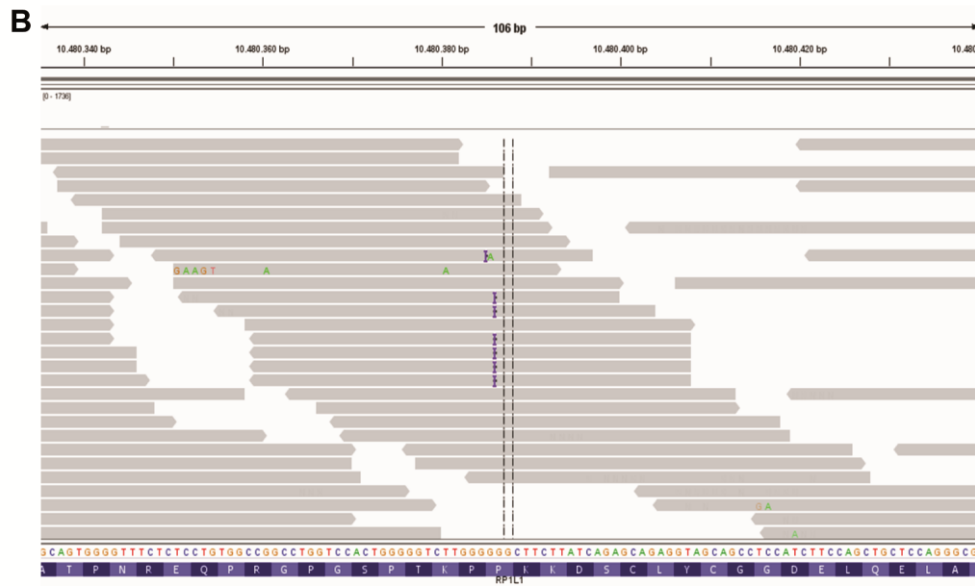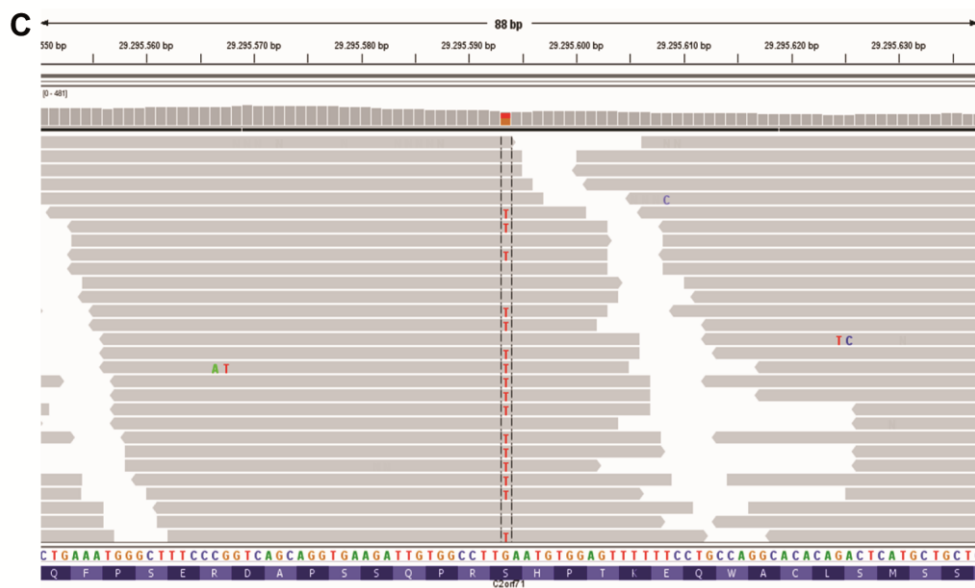

**S1 Table: Other variants detected in the affected individual.**

---

|                                    |                     |                           |                                  |                       |                                                                                                             |
|------------------------------------|---------------------|---------------------------|----------------------------------|-----------------------|-------------------------------------------------------------------------------------------------------------|
| <b>Chromosome</b>                  | chr1                | chr2                      | chr1                             | chr1                  | chr16                                                                                                       |
| <b>Position</b>                    | 1940224             | 201400812                 | 27190149                         | 27190196              | 21739698                                                                                                    |
| <b>Gene name</b>                   | <i>LRTM2</i>        | <i>SGOL2</i>              | <i>SFN</i>                       | <i>SFN</i>            | <i>OTOA</i>                                                                                                 |
| <b>Reference nucleotide</b>        | C                   | G                         | C                                | A                     | A                                                                                                           |
| <b>Number of reference reads</b>   | 1                   | 1                         | 115                              | 96                    | 33                                                                                                          |
| <b>Variant nucleotide</b>          | T                   | A                         | T                                | T                     | T                                                                                                           |
| <b>Number of variant reads</b>     | 7                   | 13                        | 87                               | 81                    | 24                                                                                                          |
| <b>Percentage of variant reads</b> | 86%                 | 93%                       | 43%                              | 46%                   | 42%                                                                                                         |
| <b>Mutation type</b>               | Missense            | Missense                  | Missense                         | Missense              | Missense                                                                                                    |
| <b>Refseq</b>                      | NM_001163926        | NM_152524                 | NM_006142                        | NM_006142             | NM_144672                                                                                                   |
| <b>Mutation DNA</b>                | c.191C>T            | c.334G>A                  | c.446C>T                         | c.493A>T              | c.2153A>T                                                                                                   |
| <b>Mutation protein</b>            | p.Pro64Leu          | p.Ala112Thr               | p.Ser149Leu                      | p.Thr165Ser           | p.Asp718Val                                                                                                 |
| <b>PhyloP score</b>                | 2.469               | 0.841                     | 1.547                            | 5.122                 | 0.344                                                                                                       |
| <b>SIFT prediction</b>             | Deleterious         | Tolerated                 | Tolerated                        | Deleterious           | Tolerated                                                                                                   |
| <b>Polyphen2 prediction</b>        | Benign              | Possibly damaging         | Benign                           | Probably damaging     | Benign                                                                                                      |
| <b>Sanger verification</b>         | No                  | No                        | No                               | No                    | No                                                                                                          |
| <b>Identified by</b>               | Homozygous analysis | Homozygous analysis       | Heterozygous analysis            | Heterozygous analysis | Hearing impairment genes analysis                                                                           |
| <b>Remarks</b>                     | Unknown function    | Function in gametogenesis | EVS frequency 2/8598, rs78707984 | rs77755255            | Autosomal recessive hearing impairment, no second mutation in raw exome data, exon 20 and 22-28 not covered |

---

**S2 Table: List of the retinal disease genes and coverage data.**

| Chromosome | Start position | End position | Gene name | Gene id   | Total exons | Total coding exons | Component nr | Exon size | reads | bps    | coverage | Overlap %   |
|------------|----------------|--------------|-----------|-----------|-------------|--------------------|--------------|-----------|-------|--------|----------|-------------|
| chr1       | 5923175        | 5923553      | NPHP4     | NM_015102 | 30          | 29                 | 30           | 141       | 2414  | 111136 | 293,23   | 100         |
| chr1       | 5923851        | 5924060      | NPHP4     | NM_015102 | 30          | 29                 | 29           | 144       | 220   | 9521   | 45,34    | 77,1        |
| chr1       | 5924449        | 5924640      | NPHP4     | NM_015102 | 30          | 29                 | 28           | 180       | 27    | 997    | 5,19     | 71,7        |
| chr1       | 5925089        | 5925277      | NPHP4     | NM_015102 | 30          | 29                 | 27           | 172       | 83    | 3481   | 18,42    | 67,4        |
| chr1       | 5926343        | 5926543      | NPHP4     | NM_015102 | 30          | 29                 | 26           | 86        | 37    | 1678   | 8,35     | 100         |
| chr1       | 5927091        | 5927306      | NPHP4     | NM_015102 | 30          | 29                 | 25           | 86        | 2336  | 102418 | 474,16   | 98,8        |
| chr1       | 5927834        | 5928117      | NPHP4     | NM_015102 | 30          | 29                 | 24           | 157       | 269   | 12362  | 43,53    | 78,3        |
| chr1       | 5933264        | 5933440      | NPHP4     | NM_015102 | 30          | 29                 | 23           | 84        | 475   | 21255  | 120,08   | 100         |
| chr1       | 5934460        | 5934663      | NPHP4     | NM_015102 | 30          | 29                 | 22           | 187       | 209   | 8773   | 43       | 71,1        |
| chr1       | 5934892        | 5935172      | NPHP4     | NM_015102 | 30          | 29                 | 21           | 227       | 180   | 8682   | 30,9     | 100         |
| chr1       | 5937205        | 5937414      | NPHP4     | NM_015102 | 30          | 29                 | 20           | 206       | 425   | 18407  | 87,65    | 74,8        |
| chr1       | 5940204        | 5940395      | NPHP4     | NM_015102 | 30          | 29                 | 19           | 126       | 543   | 23702  | 123,45   | 76,2        |
| chr1       | 5947347        | 5947541      | NPHP4     | NM_015102 | 30          | 29                 | 18           | 181       | 325   | 12790  | 65,59    | 99,4        |
| chr1       | 5950976        | 5951182      | NPHP4     | NM_015102 | 30          | 29                 | 17           | 161       | 71    | 3011   | 14,55    | 70,2        |
| chr1       | 5964597        | 5964821      | NPHP4     | NM_015102 | 30          | 29                 | 16           | 188       | 460   | 19136  | 85,05    | 77,1        |
| chr1       | 5965282        | 5965796      | NPHP4     | NM_015102 | 30          | 29                 | 15,14        | 192.152   | 1429  | 65625  | 127,43   | 100.0,69.1  |
| chr1       | 5967202        | 5967387      | NPHP4     | NM_015102 | 30          | 29                 | 13           | 108       | 111   | 4392   | 23,61    | 75          |
| chr1       | 5969090        | 5969266      | NPHP4     | NM_015102 | 30          | 29                 | 12           | 62        | 139   | 5876   | 33,2     | 88,7        |
| chr1       | 5987602        | 5987817      | NPHP4     | NM_015102 | 30          | 29                 | 11           | 139       | 479   | 19045  | 88,17    | 78,4        |
| chr1       | 5993131        | 5993322      | NPHP4     | NM_015102 | 30          | 29                 | 10           | 183       | 114   | 4560   | 23,75    | 63,4        |
| chr1       | 6007051        | 6007251      | NPHP4     | NM_015102 | 30          | 29                 | 9            | 127       | 382   | 16528  | 82,23    | 69,3        |
| chr1       | 6008053        | 6008244      | NPHP4     | NM_015102 | 30          | 29                 | 8            | 182       | 895   | 39915  | 207,89   | 63,2        |
| chr1       | 6012730        | 6012942      | NPHP4     | NM_015102 | 30          | 29                 | 7            | 137       | 241   | 9891   | 46,44    | 100         |
| chr1       | 6021902        | 6022099      | NPHP4     | NM_015102 | 30          | 29                 | 6            | 156       | 81    | 3240   | 16,36    | 69,2        |
| chr1       | 6027215        | 6027436      | NPHP4     | NM_015102 | 30          | 29                 | 5            | 65        | 95    | 4403   | 19,83    | 100         |
| chr1       | 6029087        | 6029311      | NPHP4     | NM_015102 | 30          | 29                 | 4            | 173       | 818   | 36315  | 161,4    | 95,4        |
| chr1       | 6038330        | 6038515      | NPHP4     | NM_015102 | 30          | 29                 | 3            | 144       | 455   | 19927  | 107,13   | 100         |
| chr1       | 6046140        | 6046325      | NPHP4     | NM_015102 | 30          | 29                 | 2            | 135       | 913   | 38554  | 207,28   | 82,2        |
| chr1       | 10032144       | 10032264     | NMNAT1    | NM_022787 | 5           | 4                  | 2            | 115       | 11    | 435    | 3,6      | 89,6        |
| chr1       | 10035701       | 10035904     | NMNAT1    | NM_022787 | 5           | 4                  | 3            | 184       | 692   | 30760  | 150,78   | 72,3        |
| chr1       | 10041147       | 10041320     | NMNAT1    | NM_022787 | 5           | 4                  | 4            | 140       | 136   | 6337   | 36,42    | 58,6        |
| chr1       | 10042321       | 10042601     | NMNAT1    | NM_022787 | 5           | 4                  | 5            | 401       | 408   | 17915  | 63,75    | 60,6        |
| chr1       | 10042671       | 10042862     | NMNAT1    | NM_022787 | 5           | 4                  | 5            | 401       | 360   | 15334  | 79,86    | 22,2        |
| chr1       | 12049163       | 12049354     | MFN2      | NM_014874 | 19          | 17                 | 3            | 175       | 514   | 22200  | 115,63   | 73,7        |
| chr1       | 12052585       | 12052779     | MFN2      | NM_014874 | 19          | 17                 | 4            | 136       | 1863  | 81694  | 418,94   | 100         |
| chr1       | 12056142       | 12056318     | MFN2      | NM_014874 | 19          | 17                 | 5            | 163       | 814   | 35577  | 201      | 65          |
| chr1       | 12057348       | 12057548     | MFN2      | NM_014874 | 19          | 17                 | 6            | 125       | 674   | 28854  | 143,55   | 100         |
| chr1       | 12058776       | 12059145     | MFN2      | NM_014874 | 19          | 17                 | 7,8          | 109.108   | 1443  | 66811  | 180,57   | 100.0,93.5  |
| chr1       | 12061509       | 12061697     | MFN2      | NM_014874 | 19          | 17                 | 9            | 154       | 150   | 6611   | 34,98    | 66,9        |
| chr1       | 12061788       | 12062142     | MFN2      | NM_014874 | 19          | 17                 | 10,11        | 68.122    | 856   | 40753  | 114,8    | 100.0,85.2  |
| chr1       | 12064014       | 12064211     | MFN2      | NM_014874 | 19          | 17                 | 12           | 127       | 149   | 6148   | 31,05    | 100         |
| chr1       | 12064460       | 12064651     | MFN2      | NM_014874 | 19          | 17                 | 13           | 105       | 896   | 38855  | 202,37   | 81,9        |
| chr1       | 12064892       | 12065098     | MFN2      | NM_014874 | 19          | 17                 | 14           | 103       | 505   | 20441  | 98,75    | 90,3        |
| chr1       | 12065737       | 12066011     | MFN2      | NM_014874 | 19          | 17                 | 15           | 221       | 1054  | 47026  | 171      | 100         |
| chr1       | 12066572       | 12066778     | MFN2      | NM_014874 | 19          | 17                 | 16           | 156       | 806   | 34251  | 165,46   | 100         |
| chr1       | 12067149       | 12067346     | MFN2      | NM_014874 | 19          | 17                 | 17           | 197       | 312   | 12315  | 62,2     | 80,2        |
| chr1       | 12069654       | 12069836     | MFN2      | NM_014874 | 19          | 17                 | 18           | 135       | 285   | 12397  | 67,74    | 96,3        |
| chr1       | 12071583       | 12071703     | MFN2      | NM_014874 | 19          | 17                 | 19           | 70        | 111   | 4729   | 39,08    | 57,1        |
| chr1       | 19545741       | 19546246     | EMC1      | NM_015047 | 23          | 23                 | 23,22        | 180.130   | 1728  | 82221  | 162,49   | 100.0,100.0 |
| chr1       | 19547244       | 19547435     | EMC1      | NM_015047 | 23          | 23                 | 21           | 85        | 294   | 12662  | 65,95    | 100         |
| chr1       | 19549179       | 19549388     | EMC1      | NM_015047 | 23          | 23                 | 20           | 211       | 299   | 12354  | 58,83    | 71,1        |
| chr1       | 19549819       | 19550004     | EMC1      | NM_015047 | 23          | 23                 | 19           | 174       | 1205  | 52777  | 283,75   | 66,1        |

|      |          |          |        |           |    |    |          |            |      |       |        |                  |
|------|----------|----------|--------|-----------|----|----|----------|------------|------|-------|--------|------------------|
| chr1 | 19553847 | 19554035 | EMC1   | NM_015047 | 23 | 23 | 18       | 138        | 124  | 5444  | 28,8   | 71               |
| chr1 | 19557372 | 19557563 | EMC1   | NM_015047 | 23 | 23 | 17       | 120        | 398  | 16413 | 85,48  | 71,7             |
| chr1 | 19557810 | 19557989 | EMC1   | NM_015047 | 23 | 23 | 16       | 162        | 172  | 7575  | 42,08  | 66               |
| chr1 | 19559158 | 19559660 | EMC1   | NM_015047 | 23 | 23 | 15,14    | 150.200    | 1367 | 66044 | 131,3  | 73.3,100.0       |
| chr1 | 19561527 | 19561721 | EMC1   | NM_015047 | 23 | 23 | 13       | 123        | 587  | 25242 | 129,45 | 79,7             |
| chr1 | 19563562 | 19563738 | EMC1   | NM_015047 | 23 | 23 | 12       | 97         | 641  | 25613 | 144,71 | 100              |
| chr1 | 19564543 | 19564728 | EMC1   | NM_015047 | 23 | 23 | 11       | 123        | 506  | 21205 | 114,01 | 74               |
| chr1 | 19565264 | 19565455 | EMC1   | NM_015047 | 23 | 23 | 10       | 63         | 493  | 22990 | 119,74 | 100              |
| chr1 | 19565615 | 19565788 | EMC1   | NM_015047 | 23 | 23 | 9        | 72         | 840  | 36364 | 208,99 | 88,9             |
| chr1 | 19566232 | 19566423 | EMC1   | NM_015047 | 23 | 23 | 8        | 168        | 248  | 10435 | 54,35  | 66,7             |
| chr1 | 19566834 | 19567025 | EMC1   | NM_015047 | 23 | 23 | 7        | 150        | 227  | 9940  | 51,77  | 71,3             |
| chr1 | 19567439 | 19567642 | EMC1   | NM_015047 | 23 | 23 | 6        | 127        | 935  | 41579 | 203,82 | 100              |
| chr1 | 19568811 | 19568993 | EMC1   | NM_015047 | 23 | 23 | 5        | 129        | 255  | 10987 | 60,04  | 100              |
| chr1 | 19570123 | 19570314 | EMC1   | NM_015047 | 23 | 23 | 4        | 94         | 1063 | 46813 | 243,82 | 84               |
| chr1 | 19570451 | 19570648 | EMC1   | NM_015047 | 23 | 23 | 3        | 66         | 153  | 6518  | 32,92  | 89,4             |
| chr1 | 19571333 | 19571598 | EMC1   | NM_015047 | 23 | 23 | 2        | 125        | 509  | 23163 | 87,08  | 100              |
| chr1 | 19577867 | 19578088 | EMC1   | NM_015047 | 23 | 23 | 1        | 95         | 677  | 29789 | 134,18 | 100              |
| chr1 | 20411296 | 20411499 | PLA2G5 | NM_000929 | 5  | 4  | 2        | 40         | 1018 | 46828 | 229,55 | 100              |
| chr1 | 20412607 | 20412822 | PLA2G5 | NM_000929 | 5  | 4  | 3        | 145        | 502  | 23030 | 106,62 | 78,6             |
| chr1 | 20416189 | 20416371 | PLA2G5 | NM_000929 | 5  | 4  | 4        | 107        | 762  | 30841 | 168,53 | 84,1             |
| chr1 | 20417122 | 20417316 | PLA2G5 | NM_000929 | 5  | 4  | 5        | 125        | 2252 | 98492 | 505,09 | 51,2             |
| chr1 | 26759269 | 26759469 | DHDDS  | NM_024887 | 9  | 8  | 2        | 63         | 331  | 14666 | 72,97  | 52,4             |
| chr1 | 26764541 | 26764741 | DHDDS  | NM_024887 | 9  | 8  | 3        | 117        | 318  | 13847 | 68,89  | 70,9             |
| chr1 | 26769248 | 26769454 | DHDDS  | NM_024887 | 9  | 8  | 4        | 143        | 354  | 15121 | 73,05  | 81,8             |
| chr1 | 26772839 | 26773024 | DHDDS  | NM_024887 | 9  | 8  | 5        | 117        | 895  | 38907 | 209,18 | 72,6             |
| chr1 | 26773982 | 26774256 | DHDDS  | NM_024887 | 9  | 8  | 6        | 102        | 1023 | 47410 | 172,4  | 100              |
| chr1 | 26784187 | 26784369 | DHDDS  | NM_024887 | 9  | 8  | 7        | 115        | 942  | 38641 | 211,15 | 76,5             |
| chr1 | 26786532 | 26786753 | DHDDS  | NM_024887 | 9  | 8  | 8        | 108        | 457  | 20659 | 93,06  | 96,3             |
| chr1 | 26795347 | 26795728 | DHDDS  | NM_024887 | 9  | 8  | 9        | 240        | 459  | 20106 | 52,63  | 100              |
| chr1 | 68895394 | 68895677 | RPE65  | NM_000329 | 14 | 14 | 14       | 152        | 851  | 38357 | 135,06 | 100              |
| chr1 | 68896729 | 68897222 | RPE65  | NM_000329 | 14 | 14 | 13,12,11 | 112,95,115 | 1015 | 46888 | 94,91  | 100.0,100.0,60.0 |
| chr1 | 68903786 | 68903974 | RPE65  | NM_000329 | 14 | 14 | 10       | 130        | 279  | 11465 | 60,66  | 80,8             |
| chr1 | 68904640 | 68905089 | RPE65  | NM_000329 | 14 | 14 | 9,8      | 140.133    | 1394 | 64221 | 142,71 | 89.3,100.0       |
| chr1 | 68905172 | 68905375 | RPE65  | NM_000329 | 14 | 14 | 7        | 82         | 517  | 21707 | 106,41 | 100              |
| chr1 | 68906524 | 68906700 | RPE65  | NM_000329 | 14 | 14 | 6        | 148        | 236  | 9647  | 54,5   | 100              |
| chr1 | 68910161 | 68910512 | RPE65  | NM_000329 | 14 | 14 | 5,4      | 142.108    | 1322 | 59224 | 168,25 | 100.0,50.0       |
| chr1 | 68912313 | 68912495 | RPE65  | NM_000329 | 14 | 14 | 3        | 151        | 614  | 25511 | 139,4  | 68,2             |
| chr1 | 68914247 | 68914450 | RPE65  | NM_000329 | 14 | 14 | 2        | 83         | 80   | 3527  | 17,29  | 100              |
| chr1 | 68915448 | 68915648 | RPE65  | NM_000329 | 14 | 14 | 1        | 11         | 316  | 12860 | 63,98  | 100              |
| chr1 | 94461682 | 94461852 | ABCA4  | NM_000350 | 50 | 50 | 49       | 87         | 475  | 18502 | 108,2  | 80,5             |
| chr1 | 94463464 | 94463756 | ABCA4  | NM_000350 | 50 | 50 | 48       | 250        | 656  | 30413 | 103,8  | 81,2             |
| chr1 | 94466311 | 94466618 | ABCA4  | NM_000350 | 50 | 50 | 47,46    | 93.104     | 603  | 26121 | 84,81  | 100.0,58.7       |
| chr1 | 94467186 | 94467620 | ABCA4  | NM_000350 | 50 | 50 | 45       | 135        | 726  | 33043 | 75,96  | 100              |
| chr1 | 94471027 | 94471221 | ABCA4  | NM_000350 | 50 | 50 | 44       | 142        | 206  | 9010  | 46,21  | 78,9             |
| chr1 | 94473217 | 94473402 | ABCA4  | NM_000350 | 50 | 50 | 43       | 107        | 229  | 9607  | 51,65  | 74,8             |
| chr1 | 94473649 | 94473867 | ABCA4  | NM_000350 | 50 | 50 | 42       | 63         | 420  | 17378 | 79,35  | 100              |
| chr1 | 94474224 | 94474436 | ABCA4  | NM_000350 | 50 | 50 | 41       | 121        | 931  | 42647 | 200,22 | 100              |
| chr1 | 94476150 | 94476406 | ABCA4  | NM_000350 | 50 | 50 | 40       | 130        | 542  | 24456 | 95,16  | 39,2             |
| chr1 | 94476815 | 94477003 | ABCA4  | NM_000350 | 50 | 50 | 39       | 124        | 413  | 18322 | 96,94  | 100              |
| chr1 | 94480015 | 94480206 | ABCA4  | NM_000350 | 50 | 50 | 38       | 148        | 734  | 31582 | 164,49 | 73               |
| chr1 | 94481255 | 94481446 | ABCA4  | NM_000350 | 50 | 50 | 37       | 116        | 438  | 18854 | 98,2   | 100              |
| chr1 | 94485123 | 94485311 | ABCA4  | NM_000350 | 50 | 50 | 36       | 178        | 325  | 14142 | 74,83  | 97,8             |
| chr1 | 94486840 | 94487043 | ABCA4  | NM_000350 | 50 | 50 | 35       | 170        | 168  | 6939  | 34,01  | 74,1             |
| chr1 | 94487162 | 94487528 | ABCA4  | NM_000350 | 50 | 50 | 34,33    | 75.106     | 727  | 32921 | 89,7   | 100.0,100.0      |

|      |           |           |         |           |    |    |          |          |      |       |        |                  |
|------|-----------|-----------|---------|-----------|----|----|----------|----------|------|-------|--------|------------------|
| chr1 | 94488929  | 94489117  | ABCA4   | NM_000350 | 50 | 50 | 32       | 33       | 704  | 27472 | 145,35 | 100              |
| chr1 | 94490480  | 94490695  | ABCA4   | NM_000350 | 50 | 50 | 31       | 95       | 171  | 7456  | 34,52  | 100              |
| chr1 | 94495050  | 94495259  | ABCA4   | NM_000350 | 50 | 50 | 30       | 187      | 38   | 1608  | 7,66   | 73,8             |
| chr1 | 94495992  | 94496183  | ABCA4   | NM_000350 | 50 | 50 | 29       | 99       | 651  | 27846 | 145,03 | 91,9             |
| chr1 | 94496585  | 94496767  | ABCA4   | NM_000350 | 50 | 50 | 28       | 125      | 99   | 4359  | 23,82  | 73,6             |
| chr1 | 94497371  | 94497672  | ABCA4   | NM_000350 | 50 | 50 | 27       | 266      | 280  | 12507 | 41,41  | 86,1             |
| chr1 | 94502279  | 94502482  | ABCA4   | NM_000350 | 50 | 50 | 26       | 49       | 170  | 6903  | 33,84  | 100              |
| chr1 | 94502721  | 94502924  | ABCA4   | NM_000350 | 50 | 50 | 25       | 206      | 850  | 36464 | 178,75 | 90,3             |
| chr1 | 94505594  | 94505812  | ABCA4   | NM_000350 | 50 | 50 | 24       | 85       | 1096 | 41257 | 188,39 | 100              |
| chr1 | 94506710  | 94506898  | ABCA4   | NM_000350 | 50 | 50 | 23       | 194      | 373  | 15244 | 80,66  | 69,1             |
| chr1 | 94508312  | 94508512  | ABCA4   | NM_000350 | 50 | 50 | 22       | 138      | 452  | 19968 | 99,34  | 100              |
| chr1 | 94508936  | 94509136  | ABCA4   | NM_000350 | 50 | 50 | 21       | 140      | 206  | 8804  | 43,8   | 68,6             |
| chr1 | 94510143  | 94510349  | ABCA4   | NM_000350 | 50 | 50 | 20       | 132      | 666  | 29662 | 143,29 | 100              |
| chr1 | 94512485  | 94512697  | ABCA4   | NM_000350 | 50 | 50 | 19       | 175      | 257  | 11022 | 51,75  | 94,3             |
| chr1 | 94514311  | 94514511  | ABCA4   | NM_000350 | 50 | 50 | 18       | 90       | 1764 | 75102 | 373,64 | 97,8             |
| chr1 | 94517112  | 94517333  | ABCA4   | NM_000350 | 50 | 50 | 17       | 66       | 581  | 26651 | 120,05 | 100              |
| chr1 | 94520620  | 94520799  | ABCA4   | NM_000350 | 50 | 50 | 16       | 205      | 1440 | 63420 | 352,33 | 64,9             |
| chr1 | 94522202  | 94522455  | ABCA4   | NM_000350 | 50 | 50 | 15       | 222      | 576  | 26691 | 105,08 | 79,7             |
| chr1 | 94526123  | 94526403  | ABCA4   | NM_000350 | 50 | 50 | 14       | 223      | 967  | 43290 | 154,06 | 86,5             |
| chr1 | 94528153  | 94528341  | ABCA4   | NM_000350 | 50 | 50 | 13       | 177      | 452  | 19305 | 102,14 | 88,7             |
| chr1 | 94528610  | 94528795  | ABCA4   | NM_000350 | 50 | 50 | 12       | 206      | 323  | 13557 | 72,89  | 62,1             |
| chr1 | 94543304  | 94543498  | ABCA4   | NM_000350 | 50 | 50 | 11       | 198      | 798  | 33745 | 173,05 | 70,7             |
| chr1 | 94544139  | 94544336  | ABCA4   | NM_000350 | 50 | 50 | 10       | 117      | 398  | 16359 | 82,62  | 100              |
| chr1 | 94544871  | 94545083  | ABCA4   | NM_000350 | 50 | 50 | 9        | 140      | 256  | 11126 | 52,23  | 100              |
| chr1 | 94545941  | 94546218  | ABCA4   | NM_000350 | 50 | 50 | 8        | 241      | 655  | 29322 | 105,47 | 76,8             |
| chr1 | 94548837  | 94549022  | ABCA4   | NM_000350 | 50 | 50 | 7        | 90       | 333  | 13395 | 72,02  | 100              |
| chr1 | 94564288  | 94564482  | ABCA4   | NM_000350 | 50 | 50 | 6        | 198      | 1346 | 57084 | 292,74 | 67,2             |
| chr1 | 94568582  | 94568797  | ABCA4   | NM_000350 | 50 | 50 | 5        | 128      | 452  | 20406 | 94,47  | 91,4             |
| chr1 | 94574141  | 94574326  | ABCA4   | NM_000350 | 50 | 50 | 4        | 140      | 92   | 4407  | 23,69  | 94,3             |
| chr1 | 94576967  | 94577164  | ABCA4   | NM_000350 | 50 | 50 | 3        | 142      | 265  | 11113 | 56,13  | 100              |
| chr1 | 94578520  | 94578702  | ABCA4   | NM_000350 | 50 | 50 | 2        | 94       | 146  | 6207  | 33,92  | 100              |
| chr1 | 94586477  | 94586677  | ABCA4   | NM_000350 | 50 | 50 | 1        | 66       | 556  | 25394 | 126,34 | 100              |
| chr1 | 103343449 | 103343726 | COL11A1 | NM_001854 | 67 | 67 | 67       | 147      | 418  | 18499 | 66,54  | 100              |
| chr1 | 103345185 | 103345480 | COL11A1 | NM_001854 | 67 | 67 | 66       | 234      | 1108 | 48954 | 165,39 | 100              |
| chr1 | 103347189 | 103347371 | COL11A1 | NM_001854 | 67 | 67 | 65       | 69       | 201  | 8251  | 45,09  | 100              |
| chr1 | 103348683 | 103348874 | COL11A1 | NM_001854 | 67 | 67 | 64       | 113      | 222  | 9634  | 50,18  | 100              |
| chr1 | 103352392 | 103352657 | COL11A1 | NM_001854 | 67 | 67 | 63       | 250      | 743  | 34096 | 128,18 | 88,4             |
| chr1 | 103354171 | 103354552 | COL11A1 | NM_001854 | 67 | 67 | 62,61,60 | 54,36,54 | 451  | 21359 | 55,91  | 29,6,100,0,100,0 |
| chr1 | 103354949 | 103355170 | COL11A1 | NM_001854 | 67 | 67 | 59       | 108      | 501  | 21827 | 98,32  | 100              |
| chr1 | 103355939 | 103356130 | COL11A1 | NM_001854 | 67 | 67 | 58       | 54       | 125  | 5498  | 28,64  | 100              |
| chr1 | 103363613 | 103363795 | COL11A1 | NM_001854 | 67 | 67 | 57       | 54       | 19   | 766   | 4,19   | 100              |
| chr1 | 103364160 | 103364550 | COL11A1 | NM_001854 | 67 | 67 | 56,55    | 108,54   | 220  | 10636 | 27,2   | 100,0,100,0      |
| chr1 | 103377641 | 103377853 | COL11A1 | NM_001854 | 67 | 67 | 54       | 54       | 105  | 4355  | 20,45  | 100              |
| chr1 | 103379128 | 103379313 | COL11A1 | NM_001854 | 67 | 67 | 53       | 54       | 788  | 34257 | 184,18 | 100              |
| chr1 | 103379834 | 103380031 | COL11A1 | NM_001854 | 67 | 67 | 52       | 54       | 110  | 4972  | 25,11  | 100              |
| chr1 | 103380288 | 103380464 | COL11A1 | NM_001854 | 67 | 67 | 51       | 108      | 175  | 7488  | 42,31  | 74,1             |
| chr1 | 103381098 | 103381307 | COL11A1 | NM_001854 | 67 | 67 | 50       | 54       | 235  | 10498 | 49,99  | 100              |
| chr1 | 103385796 | 103385993 | COL11A1 | NM_001854 | 67 | 67 | 49       | 54       | 475  | 21385 | 108,01 | 100              |
| chr1 | 103387003 | 103387212 | COL11A1 | NM_001854 | 67 | 67 | 48       | 54       | 152  | 6998  | 33,32  | 100              |
| chr1 | 103388815 | 103389009 | COL11A1 | NM_001854 | 67 | 67 | 47       | 54       | 679  | 27777 | 142,45 | 100              |
| chr1 | 103399943 | 103400173 | COL11A1 | NM_001854 | 67 | 67 | 46       | 108      | 643  | 28965 | 125,39 | 100              |
| chr1 | 103400518 | 103400703 | COL11A1 | NM_001854 | 67 | 67 | 45       | 54       | 236  | 10526 | 56,59  | 100              |
| chr1 | 103404526 | 103404717 | COL11A1 | NM_001854 | 67 | 67 | 44       | 54       | 694  | 30190 | 157,24 | 100              |
| chr1 | 103405821 | 103406051 | COL11A1 | NM_001854 | 67 | 67 | 43       | 108      | 754  | 32231 | 139,53 | 100              |

|      |           |           |         |           |    |    |          |          |      |        |        |                   |
|------|-----------|-----------|---------|-----------|----|----|----------|----------|------|--------|--------|-------------------|
| chr1 | 103412343 | 103412573 | COL11A1 | NM_001854 | 67 | 67 | 42       | 108      | 212  | 8969   | 38,83  | 100               |
| chr1 | 103427318 | 103427518 | COL11A1 | NM_001854 | 67 | 67 | 41       | 54       | 327  | 14763  | 73,45  | 100               |
| chr1 | 103427673 | 103427879 | COL11A1 | NM_001854 | 67 | 67 | 40       | 90       | 316  | 13226  | 63,89  | 100               |
| chr1 | 103428147 | 103428377 | COL11A1 | NM_001854 | 67 | 67 | 39       | 108      | 237  | 10071  | 43,6   | 100               |
| chr1 | 103430957 | 103431181 | COL11A1 | NM_001854 | 67 | 67 | 38       | 54       | 209  | 9432   | 41,92  | 100               |
| chr1 | 103435686 | 103435898 | COL11A1 | NM_001854 | 67 | 67 | 37       | 54       | 465  | 20397  | 95,76  | 100               |
| chr1 | 103440309 | 103440524 | COL11A1 | NM_001854 | 67 | 67 | 36       | 54       | 293  | 12232  | 56,63  | 100               |
| chr1 | 103444217 | 103444663 | COL11A1 | NM_001854 | 67 | 67 | 35,34,33 | 45,54,45 | 487  | 21371  | 47,81  | 100.0,100.0,100.0 |
| chr1 | 103444854 | 103445134 | COL11A1 | NM_001854 | 67 | 67 | 32       | 54       | 519  | 24205  | 86,14  | 100               |
| chr1 | 103449635 | 103449811 | COL11A1 | NM_001854 | 67 | 67 | 31       | 54       | 162  | 6242   | 35,27  | 100               |
| chr1 | 103453115 | 103453324 | COL11A1 | NM_001854 | 67 | 67 | 30       | 108      | 706  | 28039  | 133,52 | 100               |
| chr1 | 103455063 | 103455272 | COL11A1 | NM_001854 | 67 | 67 | 29       | 54       | 537  | 24156  | 115,03 | 100               |
| chr1 | 103461474 | 103461677 | COL11A1 | NM_001854 | 67 | 67 | 27       | 54       | 73   | 3193   | 15,65  | 100               |
| chr1 | 103462566 | 103462745 | COL11A1 | NM_001854 | 67 | 67 | 26       | 45       | 926  | 37884  | 210,47 | 100               |
| chr1 | 103463801 | 103463983 | COL11A1 | NM_001854 | 67 | 67 | 25       | 54       | 123  | 4764   | 26,03  | 100               |
| chr1 | 103467342 | 103467539 | COL11A1 | NM_001854 | 67 | 67 | 24       | 45       | 1048 | 45791  | 231,27 | 100               |
| chr1 | 103467895 | 103468113 | COL11A1 | NM_001854 | 67 | 67 | 23       | 54       | 124  | 5331   | 24,34  | 100               |
| chr1 | 103468233 | 103468421 | COL11A1 | NM_001854 | 67 | 67 | 22       | 45       | 546  | 23084  | 122,14 | 100               |
| chr1 | 103468655 | 103468882 | COL11A1 | NM_001854 | 67 | 67 | 21       | 54       | 592  | 25396  | 111,39 | 100               |
| chr1 | 103469986 | 103470266 | COL11A1 | NM_001854 | 67 | 67 | 20,19    | 45,54    | 284  | 12334  | 43,89  | 100.0,100.0       |
| chr1 | 103471411 | 103471922 | COL11A1 | NM_001854 | 67 | 67 | 18,17,16 | 54,54,54 | 600  | 27597  | 53,9   | 68.5,100.0,100.0  |
| chr1 | 103473945 | 103474154 | COL11A1 | NM_001854 | 67 | 67 | 15       | 54       | 338  | 14625  | 69,64  | 100               |
| chr1 | 103477866 | 103478051 | COL11A1 | NM_001854 | 67 | 67 | 14       | 57       | 247  | 10799  | 58,06  | 100               |
| chr1 | 103479972 | 103480193 | COL11A1 | NM_001854 | 67 | 67 | 13       | 84       | 583  | 25505  | 114,89 | 100               |
| chr1 | 103481160 | 103481360 | COL11A1 | NM_001854 | 67 | 67 | 12       | 75       | 33   | 1043   | 5,19   | 100               |
| chr1 | 103483297 | 103483518 | COL11A1 | NM_001854 | 67 | 67 | 11       | 63       | 304  | 13621  | 61,36  | 100               |
| chr1 | 103484339 | 103484509 | COL11A1 | NM_001854 | 67 | 67 | 10       | 42       | 139  | 5983   | 34,99  | 100               |
| chr1 | 103487175 | 103487363 | COL11A1 | NM_001854 | 67 | 67 | 9        | 63       | 1028 | 45179  | 239,04 | 100               |
| chr1 | 103488251 | 103488525 | COL11A1 | NM_001854 | 67 | 67 | 8        | 255      | 913  | 38179  | 138,83 | 89,4              |
| chr1 | 103491037 | 103491216 | COL11A1 | NM_001854 | 67 | 67 | 7        | 93       | 248  | 9905   | 55,03  | 100               |
| chr1 | 103491654 | 103491875 | COL11A1 | NM_001854 | 67 | 67 | 6        | 117      | 569  | 25045  | 112,82 | 88,9              |
| chr1 | 103496506 | 103496875 | COL11A1 | NM_001854 | 67 | 67 | 5        | 129      | 464  | 21691  | 58,62  | 100               |
| chr1 | 103540208 | 103540414 | COL11A1 | NM_001854 | 67 | 67 | 4        | 163      | 111  | 4864   | 23,5   | 79,1              |
| chr1 | 103544175 | 103544375 | COL11A1 | NM_001854 | 67 | 67 | 3        | 214      | 186  | 8589   | 42,73  | 75,7              |
| chr1 | 103548359 | 103548532 | COL11A1 | NM_001854 | 67 | 67 | 2        | 168      | 226  | 9427   | 54,18  | 100               |
| chr1 | 103573568 | 103573827 | COL11A1 | NM_001854 | 67 | 67 | 1        | 106      | 1126 | 48686  | 187,25 | 100               |
| chr1 | 110145963 | 110146237 | GNAT2   | NM_005272 | 8  | 8  | 8        | 191      | 936  | 43074  | 156,63 | 100               |
| chr1 | 110146603 | 110146809 | GNAT2   | NM_005272 | 8  | 8  | 7        | 154      | 321  | 13266  | 64,09  | 80,5              |
| chr1 | 110148628 | 110148831 | GNAT2   | NM_005272 | 8  | 8  | 6        | 130      | 199  | 8145   | 39,93  | 72,3              |
| chr1 | 110148926 | 110149129 | GNAT2   | NM_005272 | 8  | 8  | 5        | 129      | 226  | 9997   | 49     | 100               |
| chr1 | 110151303 | 110151506 | GNAT2   | NM_005272 | 8  | 8  | 4        | 158      | 1269 | 55194  | 270,56 | 68,4              |
| chr1 | 110152557 | 110152763 | GNAT2   | NM_005272 | 8  | 8  | 3        | 142      | 732  | 33254  | 160,65 | 71,8              |
| chr1 | 110152962 | 110153159 | GNAT2   | NM_005272 | 8  | 8  | 2        | 43       | 1267 | 56834  | 287,04 | 100               |
| chr1 | 110155396 | 110155611 | GNAT2   | NM_005272 | 8  | 8  | 1        | 118      | 1707 | 72592  | 336,07 | 82,2              |
| chr1 | 150297277 | 150297474 | PRPF3   | NM_004698 | 16 | 15 | 2        | 145      | 99   | 4057   | 20,49  | 51                |
| chr1 | 150298245 | 150298445 | PRPF3   | NM_004698 | 16 | 15 | 3        | 131      | 177  | 7554   | 37,58  | 72,5              |
| chr1 | 150300711 | 150300881 | PRPF3   | NM_004698 | 16 | 15 | 4        | 147      | 273  | 11907  | 69,63  | 70,1              |
| chr1 | 150305117 | 150305320 | PRPF3   | NM_004698 | 16 | 15 | 5        | 84       | 546  | 20748  | 101,71 | 100               |
| chr1 | 150305464 | 150305747 | PRPF3   | NM_004698 | 16 | 15 | 6        | 221      | 1217 | 54270  | 191,09 | 93,7              |
| chr1 | 150307426 | 150307795 | PRPF3   | NM_004698 | 16 | 15 | 7        | 307      | 662  | 31249  | 84,46  | 93,5              |
| chr1 | 150310693 | 150310884 | PRPF3   | NM_004698 | 16 | 15 | 8        | 167      | 237  | 10258  | 53,43  | 65,9              |
| chr1 | 150312888 | 150313067 | PRPF3   | NM_004698 | 16 | 15 | 9        | 80       | 450  | 19661  | 109,23 | 82,5              |
| chr1 | 150315831 | 150316031 | PRPF3   | NM_004698 | 16 | 15 | 10       | 144      | 441  | 18635  | 92,71  | 68,1              |
| chr1 | 150316685 | 150317101 | PRPF3   | NM_004698 | 16 | 15 | 11,12    | 100.114  | 2600 | 119629 | 286,88 | 53.0,100.0        |



|      |           |           |        |           |     |     |       |         |      |        |        |             |
|------|-----------|-----------|--------|-----------|-----|-----|-------|---------|------|--------|--------|-------------|
| chr1 | 150318527 | 150318727 | PRPF3  | NM_004698 | 16  | 15  | 13    | 119     | 582  | 25982  | 129,26 | 72,3        |
| chr1 | 150318900 | 150319097 | PRPF3  | NM_004698 | 16  | 15  | 14    | 84      | 160  | 6511   | 32,88  | 81          |
| chr1 | 150321638 | 150321808 | PRPF3  | NM_004698 | 16  | 15  | 15    | 62      | 95   | 4416   | 25,82  | 91,9        |
| chr1 | 150325353 | 150325583 | PRPF3  | NM_004698 | 16  | 15  | 16    | 147     | 2432 | 105806 | 458,03 | 70,1        |
| chr1 | 156124240 | 156124449 | SEMA4A | NM_022367 | 15  | 14  | 2     | 139     | 72   | 3241   | 15,43  | 57,6        |
| chr1 | 156126175 | 156126372 | SEMA4A | NM_022367 | 15  | 14  | 3     | 161     | 786  | 35286  | 178,21 | 100         |
| chr1 | 156127716 | 156127928 | SEMA4A | NM_022367 | 15  | 14  | 4     | 63      | 669  | 28459  | 133,61 | 100         |
| chr1 | 156128112 | 156128288 | SEMA4A | NM_022367 | 15  | 14  | 5     | 99      | 999  | 41607  | 235,07 | 100         |
| chr1 | 156128510 | 156128713 | SEMA4A | NM_022367 | 15  | 14  | 6     | 106     | 316  | 13536  | 66,35  | 100         |
| chr1 | 156130242 | 156130451 | SEMA4A | NM_022367 | 15  | 14  | 7     | 117     | 390  | 16599  | 79,04  | 93,2        |
| chr1 | 156130627 | 156130815 | SEMA4A | NM_022367 | 15  | 14  | 8     | 125     | 568  | 24948  | 132    | 96          |
| chr1 | 156131152 | 156131346 | SEMA4A | NM_022367 | 15  | 14  | 9     | 173     | 150  | 6001   | 30,77  | 91,3        |
| chr1 | 156132772 | 156132981 | SEMA4A | NM_022367 | 15  | 14  | 10    | 151     | 204  | 9204   | 43,83  | 75,5        |
| chr1 | 156142609 | 156142821 | SEMA4A | NM_022367 | 15  | 14  | 11    | 181     | 99   | 4079   | 19,15  | 100         |
| chr1 | 156144564 | 156145001 | SEMA4A | NM_022367 | 15  | 14  | 12,13 | 119.158 | 744  | 35032  | 79,98  | 100,0,79.1  |
| chr1 | 156145251 | 156145421 | SEMA4A | NM_022367 | 15  | 14  | 14    | 101     | 270  | 11007  | 64,37  | 74,3        |
| chr1 | 156146237 | 156146893 | SEMA4A | NM_022367 | 15  | 14  | 15    | 593     | 1384 | 63370  | 96,45  | 93,1        |
| chr1 | 185703799 | 185704248 | HMCN1  | NM_031935 | 107 | 107 | 1     | 268     | 770  | 34493  | 76,65  | 100         |
| chr1 | 185815143 | 185815367 | HMCN1  | NM_031935 | 107 | 107 | 2     | 71      | 237  | 10078  | 44,79  | 100         |
| chr1 | 185833637 | 185833855 | HMCN1  | NM_031935 | 107 | 107 | 3     | 159     | 416  | 17062  | 77,91  | 78          |
| chr1 | 185834866 | 185835060 | HMCN1  | NM_031935 | 107 | 107 | 4     | 123     | 267  | 11286  | 57,88  | 100         |
| chr1 | 185878460 | 185878663 | HMCN1  | NM_031935 | 107 | 107 | 5     | 172     | 291  | 12490  | 61,23  | 100         |
| chr1 | 185880758 | 185880946 | HMCN1  | NM_031935 | 107 | 107 | 6     | 107     | 323  | 14184  | 75,05  | 100         |
| chr1 | 185891467 | 185891667 | HMCN1  | NM_031935 | 107 | 107 | 7     | 121     | 376  | 15874  | 78,98  | 100         |
| chr1 | 185892510 | 185892793 | HMCN1  | NM_031935 | 107 | 107 | 8     | 264     | 537  | 23795  | 83,79  | 100         |
| chr1 | 185894141 | 185894353 | HMCN1  | NM_031935 | 107 | 107 | 9     | 145     | 921  | 40757  | 191,35 | 100         |
| chr1 | 185897641 | 185897847 | HMCN1  | NM_031935 | 107 | 107 | 10    | 122     | 561  | 25135  | 121,43 | 100         |
| chr1 | 185902603 | 185902913 | HMCN1  | NM_031935 | 107 | 107 | 11    | 276     | 514  | 22881  | 73,57  | 84,4        |
| chr1 | 185931608 | 185931826 | HMCN1  | NM_031935 | 107 | 107 | 12    | 142     | 649  | 28517  | 130,21 | 100         |
| chr1 | 185932878 | 185933051 | HMCN1  | NM_031935 | 107 | 107 | 13    | 128     | 280  | 11385  | 65,43  | 100         |
| chr1 | 185934899 | 185935090 | HMCN1  | NM_031935 | 107 | 107 | 14    | 114     | 288  | 12937  | 67,38  | 100         |
| chr1 | 185939430 | 185939612 | HMCN1  | NM_031935 | 107 | 107 | 15    | 159     | 309  | 13029  | 71,2   | 91,8        |
| chr1 | 185946918 | 185947106 | HMCN1  | NM_031935 | 107 | 107 | 16    | 195     | 251  | 9448   | 49,99  | 96,4        |
| chr1 | 185950015 | 185950227 | HMCN1  | NM_031935 | 107 | 107 | 17    | 96      | 630  | 28165  | 132,23 | 100         |
| chr1 | 185951354 | 185951548 | HMCN1  | NM_031935 | 107 | 107 | 18    | 128     | 195  | 8727   | 44,75  | 100         |
| chr1 | 185953275 | 185953472 | HMCN1  | NM_031935 | 107 | 107 | 19    | 145     | 165  | 6980   | 35,25  | 100         |
| chr1 | 185956507 | 185956716 | HMCN1  | NM_031935 | 107 | 107 | 20    | 113     | 688  | 29467  | 140,32 | 100         |
| chr1 | 185958548 | 185958739 | HMCN1  | NM_031935 | 107 | 107 | 21    | 160     | 319  | 13751  | 71,62  | 75          |
| chr1 | 185959342 | 185959515 | HMCN1  | NM_031935 | 107 | 107 | 22    | 169     | 392  | 16500  | 94,83  | 64,5        |
| chr1 | 185962281 | 185962481 | HMCN1  | NM_031935 | 107 | 107 | 23    | 128     | 200  | 8496   | 42,27  | 100         |
| chr1 | 185963999 | 185964273 | HMCN1  | NM_031935 | 107 | 107 | 24    | 273     | 434  | 20763  | 75,5   | 81          |
| chr1 | 185966472 | 185966678 | HMCN1  | NM_031935 | 107 | 107 | 25    | 96      | 880  | 38523  | 186,1  | 100         |
| chr1 | 185969161 | 185969388 | HMCN1  | NM_031935 | 107 | 107 | 26    | 195     | 365  | 15095  | 66,21  | 100         |
| chr1 | 185970425 | 185970883 | HMCN1  | NM_031935 | 107 | 107 | 27,28 | 131.148 | 886  | 41686  | 90,82  | 100,0,100.0 |
| chr1 | 185972803 | 185973027 | HMCN1  | NM_031935 | 107 | 107 | 29    | 127     | 651  | 28675  | 127,44 | 100         |
| chr1 | 185976248 | 185976433 | HMCN1  | NM_031935 | 107 | 107 | 30    | 155     | 601  | 26473  | 142,33 | 100         |
| chr1 | 185984277 | 185984569 | HMCN1  | NM_031935 | 107 | 107 | 31    | 279     | 952  | 43590  | 148,77 | 100         |
| chr1 | 185985039 | 185985313 | HMCN1  | NM_031935 | 107 | 107 | 32    | 282     | 671  | 29316  | 106,6  | 79,4        |
| chr1 | 185986063 | 185986245 | HMCN1  | NM_031935 | 107 | 107 | 33    | 109     | 849  | 36037  | 196,92 | 100         |
| chr1 | 185987284 | 185987469 | HMCN1  | NM_031935 | 107 | 107 | 34    | 170     | 252  | 10371  | 55,76  | 91,2        |
| chr1 | 185988667 | 185988870 | HMCN1  | NM_031935 | 107 | 107 | 35    | 155     | 581  | 25657  | 125,77 | 100         |
| chr1 | 185992108 | 185992323 | HMCN1  | NM_031935 | 107 | 107 | 36    | 124     | 508  | 22243  | 102,98 | 100         |
| chr1 | 186007016 | 186007231 | HMCN1  | NM_031935 | 107 | 107 | 37    | 102     | 339  | 14841  | 68,71  | 100         |
| chr1 | 186007963 | 186008190 | HMCN1  | NM_031935 | 107 | 107 | 38    | 177     | 435  | 19396  | 85,07  | 98,9        |

|      |           |           |       |           |     |     |       |         |      |        |        |             |
|------|-----------|-----------|-------|-----------|-----|-----|-------|---------|------|--------|--------|-------------|
| chr1 | 186008823 | 186009041 | HMCN1 | NM_031935 | 107 | 107 | 39    | 152     | 536  | 22398  | 102,27 | 100         |
| chr1 | 186010076 | 186010291 | HMCN1 | NM_031935 | 107 | 107 | 40    | 124     | 322  | 14714  | 68,12  | 100         |
| chr1 | 186014810 | 186015022 | HMCN1 | NM_031935 | 107 | 107 | 41    | 176     | 950  | 42136  | 197,82 | 100         |
| chr1 | 186017825 | 186018013 | HMCN1 | NM_031935 | 107 | 107 | 42    | 97      | 253  | 9958   | 52,69  | 100         |
| chr1 | 186022050 | 186022229 | HMCN1 | NM_031935 | 107 | 107 | 43    | 123     | 557  | 23746  | 131,92 | 100         |
| chr1 | 186022907 | 186023107 | HMCN1 | NM_031935 | 107 | 107 | 44    | 162     | 243  | 10825  | 53,86  | 93,2        |
| chr1 | 186024582 | 186024877 | HMCN1 | NM_031935 | 107 | 107 | 45    | 282     | 996  | 44782  | 151,29 | 79,8        |
| chr1 | 186026370 | 186026588 | HMCN1 | NM_031935 | 107 | 107 | 46    | 168     | 189  | 8445   | 38,56  | 97,6        |
| chr1 | 186030906 | 186031115 | HMCN1 | NM_031935 | 107 | 107 | 47    | 114     | 93   | 3686   | 17,55  | 100         |
| chr1 | 186031624 | 186031806 | HMCN1 | NM_031935 | 107 | 107 | 48    | 87      | 305  | 13615  | 74,4   | 100         |
| chr1 | 186034311 | 186034505 | HMCN1 | NM_031935 | 107 | 107 | 49    | 192     | 76   | 3282   | 16,83  | 70,8        |
| chr1 | 186036943 | 186037167 | HMCN1 | NM_031935 | 107 | 107 | 50    | 174     | 605  | 25920  | 115,2  | 100         |
| chr1 | 186038736 | 186038942 | HMCN1 | NM_031935 | 107 | 107 | 51    | 114     | 109  | 4814   | 23,26  | 100         |
| chr1 | 186039713 | 186039928 | HMCN1 | NM_031935 | 107 | 107 | 52    | 146     | 1204 | 49693  | 230,06 | 100         |
| chr1 | 186043862 | 186044032 | HMCN1 | NM_031935 | 107 | 107 | 53    | 151     | 442  | 18286  | 106,94 | 100         |
| chr1 | 186045556 | 186045747 | HMCN1 | NM_031935 | 107 | 107 | 54    | 195     | 1210 | 50898  | 265,09 | 96,4        |
| chr1 | 186047189 | 186047395 | HMCN1 | NM_031935 | 107 | 107 | 55    | 114     | 362  | 14962  | 72,28  | 100         |
| chr1 | 186050266 | 186050466 | HMCN1 | NM_031935 | 107 | 107 | 56    | 188     | 187  | 8484   | 42,21  | 68,1        |
| chr1 | 186051986 | 186052159 | HMCN1 | NM_031935 | 107 | 107 | 57    | 97      | 144  | 6271   | 36,04  | 100         |
| chr1 | 186055358 | 186055561 | HMCN1 | NM_031935 | 107 | 107 | 58    | 162     | 273  | 11687  | 57,29  | 100         |
| chr1 | 186056354 | 186056794 | HMCN1 | NM_031935 | 107 | 107 | 59,60 | 114.203 | 914  | 42648  | 96,71  | 95.6,100.0  |
| chr1 | 186056995 | 186057361 | HMCN1 | NM_031935 | 107 | 107 | 61,62 | 82.132  | 1119 | 50701  | 138,15 | 100.0,64.4  |
| chr1 | 186057697 | 186057879 | HMCN1 | NM_031935 | 107 | 107 | 63    | 150     | 81   | 3502   | 19,14  | 94,7        |
| chr1 | 186059860 | 186060060 | HMCN1 | NM_031935 | 107 | 107 | 64    | 160     | 217  | 9343   | 46,48  | 100         |
| chr1 | 186062197 | 186062412 | HMCN1 | NM_031935 | 107 | 107 | 65    | 125     | 702  | 30601  | 141,67 | 100         |
| chr1 | 186062627 | 186062854 | HMCN1 | NM_031935 | 107 | 107 | 66    | 184     | 245  | 10794  | 47,34  | 95,1        |
| chr1 | 186063341 | 186063556 | HMCN1 | NM_031935 | 107 | 107 | 67    | 98      | 282  | 12375  | 57,29  | 100         |
| chr1 | 186064328 | 186064608 | HMCN1 | NM_031935 | 107 | 107 | 68    | 279     | 1116 | 50338  | 179,14 | 83,9        |
| chr1 | 186072583 | 186072759 | HMCN1 | NM_031935 | 107 | 107 | 69    | 197     | 953  | 37345  | 210,99 | 79,2        |
| chr1 | 186076001 | 186076180 | HMCN1 | NM_031935 | 107 | 107 | 70    | 82      | 293  | 11285  | 62,69  | 100         |
| chr1 | 186077551 | 186077772 | HMCN1 | NM_031935 | 107 | 107 | 71    | 137     | 554  | 24025  | 108,22 | 100         |
| chr1 | 186081884 | 186082084 | HMCN1 | NM_031935 | 107 | 107 | 72    | 142     | 211  | 9706   | 48,29  | 99,3        |
| chr1 | 186083046 | 186083264 | HMCN1 | NM_031935 | 107 | 107 | 73    | 145     | 49   | 2046   | 9,34   | 100         |
| chr1 | 186083917 | 186084099 | HMCN1 | NM_031935 | 107 | 107 | 74    | 128     | 648  | 28009  | 153,05 | 100         |
| chr1 | 186084331 | 186084528 | HMCN1 | NM_031935 | 107 | 107 | 75    | 157     | 1356 | 57226  | 289,02 | 88,5        |
| chr1 | 186086086 | 186086301 | HMCN1 | NM_031935 | 107 | 107 | 76    | 122     | 340  | 15561  | 72,04  | 100         |
| chr1 | 186086527 | 186086721 | HMCN1 | NM_031935 | 107 | 107 | 77    | 165     | 301  | 12773  | 65,5   | 79,4        |
| chr1 | 186088294 | 186088515 | HMCN1 | NM_031935 | 107 | 107 | 78    | 108     | 501  | 22196  | 99,98  | 100         |
| chr1 | 186088853 | 186089311 | HMCN1 | NM_031935 | 107 | 107 | 79,80 | 138.135 | 1383 | 64920  | 141,44 | 100.0,100.0 |
| chr1 | 186092026 | 186092300 | HMCN1 | NM_031935 | 107 | 107 | 81    | 270     | 369  | 16415  | 59,69  | 80,7        |
| chr1 | 186094685 | 186094903 | HMCN1 | NM_031935 | 107 | 107 | 82    | 191     | 488  | 22015  | 100,53 | 88          |
| chr1 | 186097180 | 186097395 | HMCN1 | NM_031935 | 107 | 107 | 83    | 214     | 79   | 3552   | 16,44  | 86,9        |
| chr1 | 186099040 | 186099234 | HMCN1 | NM_031935 | 107 | 107 | 84    | 135     | 674  | 29717  | 152,39 | 100         |
| chr1 | 186099579 | 186099776 | HMCN1 | NM_031935 | 107 | 107 | 85    | 191     | 278  | 12728  | 64,28  | 72,3        |
| chr1 | 186101385 | 186101594 | HMCN1 | NM_031935 | 107 | 107 | 86    | 82      | 269  | 12297  | 58,56  | 100         |
| chr1 | 186105764 | 186106044 | HMCN1 | NM_031935 | 107 | 107 | 87    | 270     | 305  | 14191  | 50,5   | 90,7        |
| chr1 | 186106594 | 186107138 | HMCN1 | NM_031935 | 107 | 107 | 88,89 | 171.171 | 1156 | 56628  | 103,9  | 100.0,100.0 |
| chr1 | 186113274 | 186113504 | HMCN1 | NM_031935 | 107 | 107 | 90    | 171     | 320  | 14653  | 63,43  | 100         |
| chr1 | 186113709 | 186113894 | HMCN1 | NM_031935 | 107 | 107 | 91    | 171     | 249  | 10453  | 56,2   | 74,3        |
| chr1 | 186114609 | 186115129 | HMCN1 | NM_031935 | 107 | 107 | 92,93 | 171.171 | 2302 | 110947 | 212,95 | 56.7,100.0  |
| chr1 | 186120309 | 186120506 | HMCN1 | NM_031935 | 107 | 107 | 94    | 150     | 857  | 37351  | 188,64 | 100         |
| chr1 | 186120721 | 186120894 | HMCN1 | NM_031935 | 107 | 107 | 95    | 138     | 516  | 22486  | 129,23 | 100         |
| chr1 | 186121836 | 186122051 | HMCN1 | NM_031935 | 107 | 107 | 96    | 122     | 101  | 4424   | 20,48  | 100         |
| chr1 | 186122821 | 186123116 | HMCN1 | NM_031935 | 107 | 107 | 97    | 238     | 1659 | 79142  | 267,37 | 98,7        |

|      |           |           |        |           |     |     |       |         |      |        |        |            |
|------|-----------|-----------|--------|-----------|-----|-----|-------|---------|------|--------|--------|------------|
| chr1 | 186134107 | 186134325 | HMCN1  | NM_031935 | 107 | 107 | 98    | 63      | 322  | 13766  | 62,86  | 100        |
| chr1 | 186135263 | 186135487 | HMCN1  | NM_031935 | 107 | 107 | 99    | 120     | 208  | 8407   | 37,36  | 100        |
| chr1 | 186135981 | 186136166 | HMCN1  | NM_031935 | 107 | 107 | 100   | 135     | 651  | 26516  | 142,56 | 69,6       |
| chr1 | 186140443 | 186140652 | HMCN1  | NM_031935 | 107 | 107 | 101   | 114     | 231  | 10310  | 49,1   | 100        |
| chr1 | 186141115 | 186141345 | HMCN1  | NM_031935 | 107 | 107 | 102   | 126     | 278  | 10937  | 47,35  | 100        |
| chr1 | 186143606 | 186143803 | HMCN1  | NM_031935 | 107 | 107 | 103   | 129     | 344  | 15260  | 77,07  | 100        |
| chr1 | 186147503 | 186147860 | HMCN1  | NM_031935 | 107 | 107 | 104   | 351     | 1341 | 61823  | 172,69 | 89,2       |
| chr1 | 186151259 | 186151462 | HMCN1  | NM_031935 | 107 | 107 | 105   | 120     | 341  | 14719  | 72,15  | 100        |
| chr1 | 186157037 | 186157252 | HMCN1  | NM_031935 | 107 | 107 | 106   | 127     | 432  | 18688  | 86,52  | 82,7       |
| chr1 | 186158561 | 186159072 | HMCN1  | NM_031935 | 107 | 107 | 107   | 367     | 1374 | 62773  | 122,6  | 100        |
| chr1 | 196621080 | 196621265 | CFH    | NM_000186 | 22  | 22  | 1     | 58      | 242  | 10537  | 56,65  | 31         |
| chr1 | 196642088 | 196642303 | CFH    | NM_000186 | 22  | 22  | 2     | 186     | 513  | 21975  | 101,74 | 100        |
| chr1 | 196642915 | 196643112 | CFH    | NM_000186 | 22  | 22  | 3     | 106     | 245  | 10315  | 52,1   | 100        |
| chr1 | 196645029 | 196645211 | CFH    | NM_000186 | 22  | 22  | 4     | 77      | 595  | 26443  | 144,5  | 100        |
| chr1 | 196646586 | 196646801 | CFH    | NM_000186 | 22  | 22  | 5     | 192     | 357  | 15441  | 71,49  | 100        |
| chr1 | 196648782 | 196648952 | CFH    | NM_000186 | 22  | 22  | 6     | 171     | 321  | 13410  | 78,42  | 83         |
| chr1 | 196654210 | 196654422 | CFH    | NM_000186 | 22  | 22  | 7     | 174     | 243  | 9912   | 46,54  | 90,8       |
| chr1 | 196658701 | 196658821 | CFH    | NM_000186 | 22  | 22  | 8     | 195     | 166  | 6240   | 51,57  | 22,6       |
| chr1 | 196659159 | 196659279 | CFH    | NM_000186 | 22  | 22  | 9     | 177     | 105  | 3170   | 26,2   | 49,2       |
| chr1 | 196659349 | 196659528 | CFH    | NM_000186 | 22  | 22  | 9     | 177     | 546  | 23082  | 128,23 | 11,9       |
| chr1 | 196682897 | 196683085 | CFH    | NM_000186 | 22  | 22  | 10    | 183     | 304  | 13875  | 73,41  | 82,5       |
| chr1 | 196684746 | 196684925 | CFH    | NM_000186 | 22  | 22  | 11    | 177     | 602  | 27113  | 150,63 | 87         |
| chr1 | 196694271 | 196694459 | CFH    | NM_000186 | 22  | 22  | 12    | 177     | 367  | 15439  | 81,69  | 88,7       |
| chr1 | 196695610 | 196696109 | CFH    | NM_000186 | 22  | 22  | 13,14 | 183.180 | 627  | 28399  | 56,8   | 94,5,100.0 |
| chr1 | 196697538 | 196697711 | CFH    | NM_000186 | 22  | 22  | 15    | 177     | 455  | 19153  | 110,07 | 65         |
| chr1 | 196706013 | 196706201 | CFH    | NM_000186 | 22  | 22  | 16    | 183     | 309  | 13456  | 71,2   | 67,8       |
| chr1 | 196706606 | 196706791 | CFH    | NM_000186 | 22  | 22  | 17    | 186     | 396  | 18339  | 98,6   | 99,5       |
| chr1 | 196709750 | 196709935 | CFH    | NM_000186 | 22  | 22  | 18    | 174     | 277  | 11846  | 63,69  | 99,4       |
| chr1 | 196710986 | 196711201 | CFH    | NM_000186 | 22  | 22  | 19    | 177     | 328  | 13989  | 64,76  | 100        |
| chr1 | 196712494 | 196712614 | CFH    | NM_000186 | 22  | 22  | 20    | 177     | 246  | 8317   | 68,74  | 18,6       |
| chr1 | 196715092 | 196715212 | CFH    | NM_000186 | 22  | 22  | 21    | 183     | 296  | 11243  | 92,92  | 20,8       |
| chr1 | 196716421 | 196716541 | CFH    | NM_000186 | 22  | 22  | 22    | 203     | 20   | 968    | 8      | 11,3       |
| chr1 | 197237485 | 197237658 | CRB1   | NM_201253 | 12  | 12  | 1     | 70      | 1449 | 59515  | 342,04 | 100        |
| chr1 | 197297611 | 197298202 | CRB1   | NM_201253 | 12  | 12  | 2     | 582     | 2936 | 139243 | 235,21 | 89,9       |
| chr1 | 197313378 | 197313572 | CRB1   | NM_201253 | 12  | 12  | 3     | 196     | 345  | 15192  | 77,91  | 82,7       |
| chr1 | 197316424 | 197316642 | CRB1   | NM_201253 | 12  | 12  | 4     | 140     | 367  | 16456  | 75,14  | 100        |
| chr1 | 197325890 | 197326170 | CRB1   | NM_201253 | 12  | 12  | 5     | 183     | 1599 | 74955  | 266,74 | 100        |
| chr1 | 197390089 | 197391068 | CRB1   | NM_201253 | 12  | 12  | 6     | 957     | 3825 | 184650 | 188,42 | 98,1       |
| chr1 | 197396527 | 197397127 | CRB1   | NM_201253 | 12  | 12  | 7     | 548     | 1910 | 88073  | 146,54 | 99,3       |
| chr1 | 197398495 | 197398686 | CRB1   | NM_201253 | 12  | 12  | 8     | 166     | 314  | 13544  | 70,54  | 65,1       |
| chr1 | 197403891 | 197404793 | CRB1   | NM_201253 | 12  | 12  | 9     | 907     | 3702 | 180931 | 200,37 | 93,9       |
| chr1 | 197407743 | 197407922 | CRB1   | NM_201253 | 12  | 12  | 10    | 129     | 177  | 7251   | 40,28  | 48,8       |
| chr1 | 197411186 | 197411608 | CRB1   | NM_201253 | 12  | 12  | 11    | 127     | 2112 | 100337 | 237,2  | 100        |
| chr1 | 197446653 | 197447084 | CRB1   | NM_201253 | 12  | 12  | 12    | 216     | 1742 | 81627  | 188,95 | 100        |
| chr1 | 211652319 | 211652738 | RD3    | NM_183059 | 3   | 2   | 3     | 292     | 99   | 4474   | 10,65  | 100        |
| chr1 | 211654486 | 211654855 | RD3    | NM_183059 | 3   | 2   | 2     | 296     | 365  | 16618  | 44,91  | 91,9       |
| chr1 | 213031674 | 213032588 | FLVCR1 | NM_014053 | 10  | 10  | 1     | 738     | 347  | 15848  | 17,32  | 100        |
| chr1 | 213037020 | 213037196 | FLVCR1 | NM_014053 | 10  | 10  | 2     | 145     | 530  | 22912  | 129,45 | 89,7       |
| chr1 | 213045974 | 213046165 | FLVCR1 | NM_014053 | 10  | 10  | 3     | 141     | 446  | 19223  | 100,12 | 100        |
| chr1 | 213056706 | 213056897 | FLVCR1 | NM_014053 | 10  | 10  | 4     | 68      | 466  | 19768  | 102,96 | 100        |
| chr1 | 213058592 | 213058780 | FLVCR1 | NM_014053 | 10  | 10  | 5     | 104     | 391  | 16155  | 85,48  | 100        |
| chr1 | 213061259 | 213061435 | FLVCR1 | NM_014053 | 10  | 10  | 6     | 111     | 306  | 13443  | 75,95  | 76,6       |
| chr1 | 213061744 | 213061941 | FLVCR1 | NM_014053 | 10  | 10  | 7     | 106     | 638  | 27941  | 141,12 | 100        |
| chr1 | 213062494 | 213062691 | FLVCR1 | NM_014053 | 10  | 10  | 8     | 112     | 437  | 19549  | 98,73  | 94,6       |

|      |           |           |        |           |    |    |       |        |      |        |        |             |
|------|-----------|-----------|--------|-----------|----|----|-------|--------|------|--------|--------|-------------|
| chr1 | 213068340 | 213068703 | FLVCR1 | NM_014053 | 10 | 10 | 9,10  | 68,75  | 448  | 20399  | 56,04  | 82.4,100.0  |
| chr1 | 215798997 | 215799191 | USH2A  | NM_206933 | 72 | 71 | 72    | 90     | 274  | 11348  | 58,19  | 76,7        |
| chr1 | 215802174 | 215802478 | USH2A  | NM_206933 | 72 | 71 | 71    | 222    | 453  | 20762  | 68,07  | 91,9        |
| chr1 | 215807821 | 215808101 | USH2A  | NM_206933 | 72 | 71 | 70    | 245    | 1041 | 47289  | 168,29 | 91,8        |
| chr1 | 215812432 | 215812653 | USH2A  | NM_206933 | 72 | 71 | 69    | 84     | 204  | 8696   | 39,17  | 100         |
| chr1 | 215813959 | 215814156 | USH2A  | NM_206933 | 72 | 71 | 68    | 177    | 556  | 23630  | 119,34 | 66,7        |
| chr1 | 215820915 | 215821139 | USH2A  | NM_206933 | 72 | 71 | 67    | 209    | 147  | 6207   | 27,59  | 75,6        |
| chr1 | 215821920 | 215822197 | USH2A  | NM_206933 | 72 | 71 | 66    | 239    | 440  | 19681  | 70,79  | 79,1        |
| chr1 | 215824010 | 215824213 | USH2A  | NM_206933 | 72 | 71 | 65    | 210    | 344  | 13614  | 66,74  | 63,8        |
| chr1 | 215844234 | 215844594 | USH2A  | NM_206933 | 72 | 71 | 64    | 322    | 1041 | 46647  | 129,22 | 87,3        |
| chr1 | 215847404 | 215848985 | USH2A  | NM_206933 | 72 | 71 | 63    | 1517   | 5711 | 273665 | 172,99 | 100         |
| chr1 | 215853461 | 215853759 | USH2A  | NM_206933 | 72 | 71 | 62    | 228    | 689  | 31314  | 104,73 | 100         |
| chr1 | 215901305 | 215901671 | USH2A  | NM_206933 | 72 | 71 | 61    | 355    | 1127 | 53042  | 144,53 | 84,5        |
| chr1 | 215914703 | 215914897 | USH2A  | NM_206933 | 72 | 71 | 60    | 163    | 198  | 9083   | 46,58  | 100         |
| chr1 | 215916479 | 215916661 | USH2A  | NM_206933 | 72 | 71 | 59    | 159    | 411  | 18904  | 103,3  | 89,9        |
| chr1 | 215931969 | 215932163 | USH2A  | NM_206933 | 72 | 71 | 58    | 158    | 429  | 18490  | 94,82  | 79,7        |
| chr1 | 215932966 | 215933175 | USH2A  | NM_206933 | 72 | 71 | 57    | 184    | 736  | 31329  | 149,19 | 94,6        |
| chr1 | 215939970 | 215940185 | USH2A  | NM_206933 | 72 | 71 | 56    | 108    | 255  | 11141  | 51,58  | 100         |
| chr1 | 215953249 | 215953458 | USH2A  | NM_206933 | 72 | 71 | 55    | 199    | 580  | 25537  | 121,6  | 67,8        |
| chr1 | 215955405 | 215955575 | USH2A  | NM_206933 | 72 | 71 | 54    | 155    | 254  | 11424  | 66,81  | 86,5        |
| chr1 | 215956075 | 215956293 | USH2A  | NM_206933 | 72 | 71 | 53    | 198    | 311  | 13893  | 63,44  | 100         |
| chr1 | 215959962 | 215960147 | USH2A  | NM_206933 | 72 | 71 | 52    | 205    | 330  | 14551  | 78,23  | 66,3        |
| chr1 | 215963369 | 215963643 | USH2A  | NM_206933 | 72 | 71 | 51    | 224    | 1091 | 49524  | 180,09 | 100         |
| chr1 | 215972256 | 215972512 | USH2A  | NM_206933 | 72 | 71 | 50    | 219    | 1623 | 70581  | 274,63 | 96,8        |
| chr1 | 215987080 | 215987274 | USH2A  | NM_206933 | 72 | 71 | 49    | 169    | 274  | 11106  | 56,95  | 98,8        |
| chr1 | 215990328 | 215990549 | USH2A  | NM_206933 | 72 | 71 | 48    | 199    | 343  | 15034  | 67,72  | 100         |
| chr1 | 216011288 | 216011476 | USH2A  | NM_206933 | 72 | 71 | 47    | 113    | 119  | 4897   | 25,91  | 100         |
| chr1 | 216017600 | 216017815 | USH2A  | NM_206933 | 72 | 71 | 46    | 203    | 378  | 16502  | 76,4   | 88,7        |
| chr1 | 216019221 | 216019433 | USH2A  | NM_206933 | 72 | 71 | 45    | 210    | 229  | 9755   | 45,8   | 73,8        |
| chr1 | 216040285 | 216040515 | USH2A  | NM_206933 | 72 | 71 | 44    | 164    | 550  | 24318  | 105,27 | 100         |
| chr1 | 216051081 | 216051287 | USH2A  | NM_206933 | 72 | 71 | 43    | 123    | 672  | 29277  | 141,43 | 100         |
| chr1 | 216052146 | 216052500 | USH2A  | NM_206933 | 72 | 71 | 42    | 335    | 1300 | 61636  | 173,62 | 88,1        |
| chr1 | 216061816 | 216062496 | USH2A  | NM_206933 | 72 | 71 | 41    | 629    | 4582 | 222174 | 326,25 | 92,4        |
| chr1 | 216073375 | 216073587 | USH2A  | NM_206933 | 72 | 71 | 40    | 143    | 264  | 11390  | 53,47  | 100         |
| chr1 | 216074011 | 216074199 | USH2A  | NM_206933 | 72 | 71 | 39    | 151    | 361  | 15644  | 82,77  | 68,2        |
| chr1 | 216107941 | 216108153 | USH2A  | NM_206933 | 72 | 71 | 38    | 180    | 171  | 6807   | 31,96  | 100         |
| chr1 | 216138627 | 216138851 | USH2A  | NM_206933 | 72 | 71 | 37    | 163    | 70   | 2888   | 12,84  | 100         |
| chr1 | 216143906 | 216144121 | USH2A  | NM_206933 | 72 | 71 | 36    | 152    | 379  | 16371  | 75,79  | 100         |
| chr1 | 216166290 | 216166463 | USH2A  | NM_206933 | 72 | 71 | 35    | 148    | 529  | 23204  | 133,36 | 68,9        |
| chr1 | 216172175 | 216172375 | USH2A  | NM_206933 | 72 | 71 | 34    | 172    | 169  | 7725   | 38,43  | 85,5        |
| chr1 | 216173655 | 216173849 | USH2A  | NM_206933 | 72 | 71 | 33    | 160    | 327  | 15683  | 80,43  | 65,6        |
| chr1 | 216219768 | 216219995 | USH2A  | NM_206933 | 72 | 71 | 32    | 162    | 105  | 4280   | 18,77  | 100         |
| chr1 | 216221826 | 216222044 | USH2A  | NM_206933 | 72 | 71 | 31    | 114    | 211  | 8694   | 39,7   | 100         |
| chr1 | 216243510 | 216243710 | USH2A  | NM_206933 | 72 | 71 | 30    | 192    | 982  | 42727  | 212,57 | 65,1        |
| chr1 | 216246231 | 216246698 | USH2A  | NM_206933 | 72 | 71 | 29,28 | 81.204 | 1790 | 82628  | 176,56 | 100.0,100.0 |
| chr1 | 216251499 | 216251773 | USH2A  | NM_206933 | 72 | 71 | 27    | 274    | 464  | 22220  | 80,8   | 75,2        |
| chr1 | 216256810 | 216257028 | USH2A  | NM_206933 | 72 | 71 | 26    | 131    | 268  | 11080  | 50,59  | 90,8        |
| chr1 | 216257990 | 216258211 | USH2A  | NM_206933 | 72 | 71 | 25    | 180    | 134  | 5640   | 25,41  | 95,6        |
| chr1 | 216259996 | 216260226 | USH2A  | NM_206933 | 72 | 71 | 24    | 102    | 235  | 10397  | 45,01  | 100         |
| chr1 | 216262287 | 216262490 | USH2A  | NM_206933 | 72 | 71 | 23    | 127    | 818  | 36355  | 178,21 | 100         |
| chr1 | 216270419 | 216270628 | USH2A  | NM_206933 | 72 | 71 | 22    | 131    | 723  | 32007  | 152,41 | 100         |
| chr1 | 216348444 | 216348890 | USH2A  | NM_206933 | 72 | 71 | 21    | 231    | 319  | 15017  | 33,6   | 100         |
| chr1 | 216363518 | 216363706 | USH2A  | NM_206933 | 72 | 71 | 20    | 145    | 222  | 9658   | 51,1   | 97,9        |
| chr1 | 216369882 | 216370094 | USH2A  | NM_206933 | 72 | 71 | 19    | 170    | 1003 | 45155  | 212    | 100         |

|      |           |           |         |              |    |    |       |         |      |        |        |             |
|------|-----------|-----------|---------|--------------|----|----|-------|---------|------|--------|--------|-------------|
| chr1 | 216371612 | 216371907 | USH2A   | NM_206933    | 72 | 71 | 18    | 270     | 362  | 17562  | 59,33  | 93          |
| chr1 | 216372898 | 216373421 | USH2A   | NM_206933    | 72 | 71 | 17    | 495     | 703  | 34078  | 65,03  | 91,5        |
| chr1 | 216380623 | 216380826 | USH2A   | NM_206933    | 72 | 71 | 16    | 159     | 333  | 14658  | 71,85  | 95          |
| chr1 | 216390707 | 216390925 | USH2A   | NM_206933    | 72 | 71 | 15    | 164     | 197  | 8557   | 39,07  | 100         |
| chr1 | 216405271 | 216405501 | USH2A   | NM_206933    | 72 | 71 | 14    | 184     | 183  | 8440   | 36,54  | 100         |
| chr1 | 216419871 | 216420566 | USH2A   | NM_206933    | 72 | 71 | 13    | 642     | 2833 | 136649 | 196,33 | 99,7        |
| chr1 | 216424275 | 216424484 | USH2A   | NM_206933    | 72 | 71 | 12    | 196     | 856  | 36066  | 171,74 | 84,7        |
| chr1 | 216462583 | 216462801 | USH2A   | NM_206933    | 72 | 71 | 11    | 131     | 664  | 31157  | 142,27 | 100         |
| chr1 | 216465499 | 216465726 | USH2A   | NM_206933    | 72 | 71 | 10    | 196     | 440  | 19768  | 86,7   | 100         |
| chr1 | 216495186 | 216495410 | USH2A   | NM_206933    | 72 | 71 | 9     | 94      | 692  | 31592  | 140,41 | 100         |
| chr1 | 216496801 | 216497051 | USH2A   | NM_206933    | 72 | 71 | 8     | 222     | 798  | 36497  | 145,41 | 100         |
| chr1 | 216497516 | 216497695 | USH2A   | NM_206933    | 72 | 71 | 7     | 185     | 391  | 14962  | 83,12  | 96,8        |
| chr1 | 216498587 | 216498858 | USH2A   | NM_206933    | 72 | 71 | 6     | 295     | 563  | 24964  | 91,78  | 71,9        |
| chr1 | 216500879 | 216501058 | USH2A   | NM_206933    | 72 | 71 | 5     | 64      | 577  | 22829  | 126,83 | 100         |
| chr1 | 216538275 | 216538445 | USH2A   | NM_206933    | 72 | 71 | 4     | 133     | 353  | 15022  | 87,85  | 100         |
| chr1 | 216591892 | 216592095 | USH2A   | NM_206933    | 72 | 71 | 3     | 166     | 1069 | 46613  | 228,5  | 78,3        |
| chr1 | 216595193 | 216595802 | USH2A   | NM_206933    | 72 | 71 | 2     | 485     | 1383 | 62306  | 102,14 | 100         |
| chr1 | 243419395 | 243419565 | SDCCAG8 | NM_006642    | 18 | 18 | 1     | 67      | 371  | 15441  | 90,3   | 100         |
| chr1 | 243433457 | 243433648 | SDCCAG8 | NM_006642    | 18 | 18 | 2     | 153     | 842  | 36560  | 190,42 | 67,3        |
| chr1 | 243434210 | 243434413 | SDCCAG8 | NM_006642    | 18 | 18 | 3     | 86      | 546  | 24106  | 118,17 | 100         |
| chr1 | 243437843 | 243438019 | SDCCAG8 | NM_006642    | 18 | 18 | 4     | 114     | 152  | 6240   | 35,25  | 100         |
| chr1 | 243449569 | 243449769 | SDCCAG8 | NM_006642    | 18 | 18 | 5     | 126     | 94   | 3727   | 18,54  | 100         |
| chr1 | 243456370 | 243456813 | SDCCAG8 | NM_006642    | 18 | 18 | 6     | 129     | 437  | 19795  | 44,58  | 100         |
| chr1 | 243467976 | 243468161 | SDCCAG8 | NM_006642    | 18 | 18 | 7     | 65      | 211  | 8157   | 43,85  | 100         |
| chr1 | 243471344 | 243471538 | SDCCAG8 | NM_006642    | 18 | 18 | 8     | 189     | 434  | 19504  | 100,02 | 72          |
| chr1 | 243479993 | 243480190 | SDCCAG8 | NM_006642    | 18 | 18 | 9     | 139     | 105  | 4294   | 21,69  | 96,4        |
| chr1 | 243493737 | 243494085 | SDCCAG8 | NM_006642    | 18 | 18 | 10    | 153     | 330  | 15394  | 44,11  | 100         |
| chr1 | 243504313 | 243504498 | SDCCAG8 | NM_006642    | 18 | 18 | 11    | 135     | 207  | 9069   | 48,76  | 100         |
| chr1 | 243507411 | 243507608 | SDCCAG8 | NM_006642    | 18 | 18 | 12    | 117     | 256  | 10963  | 55,37  | 78,6        |
| chr1 | 243541972 | 243542151 | SDCCAG8 | NM_006642    | 18 | 18 | 13    | 143     | 142  | 6343   | 35,24  | 90,2        |
| chr1 | 243578904 | 243579092 | SDCCAG8 | NM_006642    | 18 | 18 | 14    | 128     | 423  | 18368  | 97,19  | 69,5        |
| chr1 | 243581184 | 243581408 | SDCCAG8 | NM_006642    | 18 | 18 | 15    | 109     | 231  | 9913   | 44,06  | 100         |
| chr1 | 243589769 | 243589954 | SDCCAG8 | NM_006642    | 18 | 18 | 16    | 132     | 326  | 12921  | 69,47  | 69,7        |
| chr1 | 243652218 | 243652406 | SDCCAG8 | NM_006642    | 18 | 18 | 17    | 127     | 170  | 7825   | 41,4   | 71,7        |
| chr1 | 243662976 | 243663232 | SDCCAG8 | NM_006642    | 18 | 18 | 18    | 30      | 687  | 32368  | 125,95 | 100         |
| chr2 | 27600306  | 27601851  | ZNF513  | NM_144631    | 4  | 4  | 4,3   | 827.588 | 1190 | 56812  | 36,75  | 100,0,88.1  |
| chr2 | 27602874  | 27603557  | ZNF513  | NM_144631    | 4  | 4  | 2,1   | 156,55  | 1777 | 84705  | 123,84 | 100,0,100.0 |
| chr2 | 29287670  | 29287885  | C2orf71 | NM_001029883 | 2  | 2  | 2     | 199     | 141  | 5462   | 25,29  | 75,9        |
| chr2 | 29293448  | 29297198  | C2orf71 | NM_001029883 | 2  | 2  | 1     | 3668    | 9275 | 449510 | 119,84 | 100         |
| chr2 | 56094077  | 56094381  | EFEMP1  | NM_001039348 | 12 | 10 | 12    | 162     | 421  | 19010  | 62,33  | 100         |
| chr2 | 56097857  | 56098306  | EFEMP1  | NM_001039348 | 12 | 10 | 11,10 | 196.124 | 1005 | 46698  | 103,77 | 99,0,100.0  |
| chr2 | 56102064  | 56102258  | EFEMP1  | NM_001039348 | 12 | 10 | 9     | 120     | 545  | 25152  | 128,98 | 100         |
| chr2 | 56103687  | 56103878  | EFEMP1  | NM_001039348 | 12 | 10 | 8     | 120     | 161  | 7550   | 39,32  | 100         |
| chr2 | 56104834  | 56105046  | EFEMP1  | NM_001039348 | 12 | 10 | 7     | 120     | 518  | 21760  | 102,16 | 100         |
| chr2 | 56108779  | 56108961  | EFEMP1  | NM_001039348 | 12 | 10 | 6     | 123     | 745  | 31537  | 172,33 | 74          |
| chr2 | 56144845  | 56145475  | EFEMP1  | NM_001039348 | 12 | 10 | 5,4   | 387,49  | 1568 | 75761  | 120,06 | 88,4,100.0  |
| chr2 | 56149425  | 56149705  | EFEMP1  | NM_001039348 | 12 | 10 | 3     | 81      | 107  | 4946   | 17,6   | 100         |
| chr2 | 62053507  | 62053808  | FAM161A | NM_032180    | 6  | 6  | 6     | 145     | 97   | 4558   | 15,09  | 100         |
| chr2 | 62054197  | 62054379  | FAM161A | NM_032180    | 6  | 6  | 5     | 155     | 193  | 8241   | 45,03  | 91          |
| chr2 | 62063058  | 62063249  | FAM161A | NM_032180    | 6  | 6  | 4     | 100     | 319  | 11269  | 58,69  | 100         |
| chr2 | 62066609  | 62067763  | FAM161A | NM_032180    | 6  | 6  | 3     | 1161    | 3106 | 148615 | 128,67 | 95,4        |
| chr2 | 62069258  | 62069547  | FAM161A | NM_032180    | 6  | 6  | 2     | 239     | 319  | 14542  | 50,14  | 99,6        |
| chr2 | 62080929  | 62081203  | FAM161A | NM_032180    | 6  | 6  | 1     | 183     | 276  | 13027  | 47,37  | 100         |
| chr2 | 63348990  | 63349258  | WDPCP   | NM_015910    | 18 | 18 | 18    | 51      | 452  | 20877  | 77,61  | 100         |

|      |          |          |          |           |    |    |          |             |       |         |        |                   |
|------|----------|----------|----------|-----------|----|----|----------|-------------|-------|---------|--------|-------------------|
| chr2 | 63379961 | 63380155 | WDPCP    | NM_015910 | 18 | 18 | 17       | 32          | 222   | 9084    | 46,58  | 100               |
| chr2 | 63380554 | 63380727 | WDPCP    | NM_015910 | 18 | 18 | 16       | 80          | 182   | 7868    | 45,22  | 100               |
| chr2 | 63401767 | 63401940 | WDPCP    | NM_015910 | 18 | 18 | 15       | 163         | 164   | 6844    | 39,33  | 83,4              |
| chr2 | 63486425 | 63486607 | WDPCP    | NM_015910 | 18 | 18 | 14       | 103         | 146   | 6699    | 36,61  | 100               |
| chr2 | 63540284 | 63540484 | WDPCP    | NM_015910 | 18 | 18 | 13       | 64          | 146   | 6106    | 30,38  | 100               |
| chr2 | 63605509 | 63605712 | WDPCP    | NM_015910 | 18 | 18 | 12       | 124         | 104   | 4338    | 21,26  | 100               |
| chr2 | 63608995 | 63609198 | WDPCP    | NM_015910 | 18 | 18 | 11       | 189         | 754   | 33044   | 161,98 | 83,6              |
| chr2 | 63631148 | 63631828 | WDPCP    | NM_015910 | 18 | 18 | 10       | 610         | 2101  | 99946   | 146,76 | 100               |
| chr2 | 63660835 | 63661044 | WDPCP    | NM_015910 | 18 | 18 | 9        | 192         | 201   | 9168    | 43,66  | 86,5              |
| chr2 | 63664500 | 63664682 | WDPCP    | NM_015910 | 18 | 18 | 8        | 134         | 49    | 2018    | 11,03  | 95,5              |
| chr2 | 63666775 | 63666972 | WDPCP    | NM_015910 | 18 | 18 | 7        | 115         | 498   | 20657   | 104,33 | 71,3              |
| chr2 | 63711697 | 63711903 | WDPCP    | NM_015910 | 18 | 18 | 6        | 60          | 443   | 18686   | 90,27  | 100               |
| chr2 | 63712003 | 63712200 | WDPCP    | NM_015910 | 18 | 18 | 5        | 71          | 108   | 5057    | 25,54  | 100               |
| chr2 | 63713603 | 63713788 | WDPCP    | NM_015910 | 18 | 18 | 4        | 45          | 159   | 6244    | 33,57  | 100               |
| chr2 | 63714573 | 63714779 | WDPCP    | NM_015910 | 18 | 18 | 3        | 48          | 170   | 7497    | 36,22  | 100               |
| chr2 | 63719883 | 63720077 | WDPCP    | NM_015910 | 18 | 18 | 2        | 85          | 194   | 8326    | 42,7   | 100               |
| chr2 | 63815366 | 63815551 | WDPCP    | NM_015910 | 18 | 18 | 1        | 75          | 91    | 3627    | 19,5   | 53,3              |
| chr2 | 73612898 | 73613018 | ALMS1    | NM_015120 | 23 | 23 | 1        | 324         | 0     | 0       | 0      | 6,8               |
| chr2 | 73613082 | 73613344 | ALMS1    | NM_015120 | 23 | 23 | 1        | 324         | 296   | 14062   | 53,47  | 73,8              |
| chr2 | 73635742 | 73635942 | ALMS1    | NM_015120 | 23 | 23 | 2        | 126         | 496   | 21611   | 107,52 | 100               |
| chr2 | 73646239 | 73646436 | ALMS1    | NM_015120 | 23 | 23 | 3        | 196         | 426   | 18404   | 92,95  | 94,9              |
| chr2 | 73650000 | 73650200 | ALMS1    | NM_015120 | 23 | 23 | 4        | 118         | 699   | 30826   | 153,36 | 87,3              |
| chr2 | 73651560 | 73652068 | ALMS1    | NM_015120 | 23 | 23 | 5        | 473         | 920   | 41301   | 81,14  | 99,6              |
| chr2 | 73653533 | 73653721 | ALMS1    | NM_015120 | 23 | 23 | 6        | 101         | 372   | 16401   | 86,78  | 100               |
| chr2 | 73659272 | 73659472 | ALMS1    | NM_015120 | 23 | 23 | 7        | 94          | 203   | 8340    | 41,49  | 100               |
| chr2 | 73675063 | 73681171 | ALMS1    | NM_015120 | 23 | 23 | 8        | 6105        | 40329 | 1929201 | 315,8  | 99,6              |
| chr2 | 73682264 | 73682440 | ALMS1    | NM_015120 | 23 | 23 | 9        | 134         | 215   | 9017    | 50,94  | 100               |
| chr2 | 73716782 | 73718674 | ALMS1    | NM_015120 | 23 | 23 | 10       | 1865        | 6415  | 306353  | 161,83 | 98,9              |
| chr2 | 73746822 | 73747102 | ALMS1    | NM_015120 | 23 | 23 | 11       | 242         | 673   | 30322   | 107,91 | 83,1              |
| chr2 | 73761928 | 73762101 | ALMS1    | NM_015120 | 23 | 23 | 12       | 126         | 802   | 35297   | 202,86 | 100               |
| chr2 | 73777441 | 73777638 | ALMS1    | NM_015120 | 23 | 23 | 13       | 171         | 289   | 12491   | 63,09  | 72,5              |
| chr2 | 73784304 | 73784513 | ALMS1    | NM_015120 | 23 | 23 | 14       | 135         | 129   | 5847    | 27,84  | 100               |
| chr2 | 73786038 | 73786268 | ALMS1    | NM_015120 | 23 | 23 | 15       | 171         | 206   | 8723    | 37,76  | 99,4              |
| chr2 | 73799389 | 73800638 | ALMS1    | NM_015120 | 23 | 23 | 16       | 1163        | 3461  | 167017  | 133,61 | 100               |
| chr2 | 73827743 | 73827931 | ALMS1    | NM_015120 | 23 | 23 | 18       | 204         | 622   | 25805   | 136,53 | 62,3              |
| chr2 | 73828338 | 73828612 | ALMS1    | NM_015120 | 23 | 23 | 19       | 242         | 338   | 15339   | 55,78  | 93,4              |
| chr2 | 73829246 | 73829428 | ALMS1    | NM_015120 | 23 | 23 | 20       | 184         | 369   | 15185   | 82,98  | 63,6              |
| chr2 | 73830339 | 73830530 | ALMS1    | NM_015120 | 23 | 23 | 21       | 64          | 470   | 20629   | 107,44 | 100               |
| chr2 | 73835554 | 73835745 | ALMS1    | NM_015120 | 23 | 23 | 22       | 100         | 171   | 7158    | 37,28  | 100               |
| chr2 | 73836659 | 73836847 | ALMS1    | NM_015120 | 23 | 23 | 23       | 45          | 453   | 18472   | 97,74  | 100               |
| chr2 | 96940646 | 96941006 | SNRNP200 | NM_014014 | 45 | 45 | 45,44    | 144,93      | 796   | 37623   | 104,22 | 100.0,12.9        |
| chr2 | 96942457 | 96943075 | SNRNP200 | NM_014014 | 45 | 45 | 43,42    | 82.161      | 2617  | 120372  | 194,46 | 100.0,100.0       |
| chr2 | 96943337 | 96943771 | SNRNP200 | NM_014014 | 45 | 45 | 41,40    | 177.144     | 1365  | 64094   | 147,34 | 66.1,100.0        |
| chr2 | 96944010 | 96944201 | SNRNP200 | NM_014014 | 45 | 45 | 39       | 122         | 324   | 13974   | 72,78  | 71,3              |
| chr2 | 96944350 | 96944778 | SNRNP200 | NM_014014 | 45 | 45 | 38,37    | 165.190     | 749   | 35722   | 83,27  | 60.6,100.0        |
| chr2 | 96945073 | 96945288 | SNRNP200 | NM_014014 | 45 | 45 | 36       | 109         | 210   | 8999    | 41,66  | 91,7              |
| chr2 | 96947430 | 96947645 | SNRNP200 | NM_014014 | 45 | 45 | 35       | 109         | 317   | 12903   | 59,74  | 86,2              |
| chr2 | 96948930 | 96949761 | SNRNP200 | NM_014014 | 45 | 45 | 34,33,32 | 152.179.192 | 2663  | 128420  | 154,35 | 100.0,100.0,100.0 |
| chr2 | 96950129 | 96950409 | SNRNP200 | NM_014014 | 45 | 45 | 31       | 228         | 797   | 36360   | 129,4  | 85,5              |
| chr2 | 96950795 | 96951167 | SNRNP200 | NM_014014 | 45 | 45 | 30       | 161         | 693   | 31882   | 85,47  | 100               |
| chr2 | 96951984 | 96952184 | SNRNP200 | NM_014014 | 45 | 45 | 29       | 174         | 222   | 10033   | 49,92  | 78,2              |
| chr2 | 96952392 | 96952921 | SNRNP200 | NM_014014 | 45 | 45 | 28,27    | 190.155     | 3468  | 158710  | 299,45 | 100.0,100.0       |
| chr2 | 96953183 | 96953407 | SNRNP200 | NM_014014 | 45 | 45 | 26       | 119         | 768   | 34287   | 152,39 | 95                |
| chr2 | 96953562 | 96953750 | SNRNP200 | NM_014014 | 45 | 45 | 25       | 107         | 949   | 40570   | 214,66 | 100               |

|      |           |           |          |           |    |    |       |             |      |        |        |                  |
|------|-----------|-----------|----------|-----------|----|----|-------|-------------|------|--------|--------|------------------|
| chr2 | 96954402  | 96954617  | SNRNP200 | NM_014014 | 45 | 45 | 24    | 84          | 195  | 7924   | 36,69  | 98,8             |
| chr2 | 96954693  | 96955074  | SNRNP200 | NM_014014 | 45 | 45 | 23,22 | 81.153      | 724  | 33893  | 88,73  | 100.0,71.9       |
| chr2 | 96955463  | 96955672  | SNRNP200 | NM_014014 | 45 | 45 | 21    | 198         | 765  | 33525  | 159,64 | 68,7             |
| chr2 | 96956060  | 96956580  | SNRNP200 | NM_014014 | 45 | 45 | 20,19 | 189.132     | 1026 | 49045  | 94,14  | 100.0,100.0      |
| chr2 | 96957132  | 96957356  | SNRNP200 | NM_014014 | 45 | 45 | 18    | 111         | 736  | 31435  | 139,71 | 98,2             |
| chr2 | 96957451  | 96957675  | SNRNP200 | NM_014014 | 45 | 45 | 17    | 150         | 859  | 36875  | 163,89 | 100              |
| chr2 | 96958674  | 96958856  | SNRNP200 | NM_014014 | 45 | 45 | 16    | 124         | 278  | 11437  | 62,5   | 100              |
| chr2 | 96958993  | 96959175  | SNRNP200 | NM_014014 | 45 | 45 | 15    | 194         | 1219 | 52778  | 288,4  | 62,9             |
| chr2 | 96961135  | 96961338  | SNRNP200 | NM_014014 | 45 | 45 | 14    | 171         | 434  | 19327  | 94,74  | 66,1             |
| chr2 | 96962254  | 96962442  | SNRNP200 | NM_014014 | 45 | 45 | 13    | 156         | 606  | 24899  | 131,74 | 100              |
| chr2 | 96962714  | 96962914  | SNRNP200 | NM_014014 | 45 | 45 | 12    | 138         | 350  | 16095  | 80,07  | 68,8             |
| chr2 | 96963174  | 96963516  | SNRNP200 | NM_014014 | 45 | 45 | 11,10 | 174,84      | 1057 | 50697  | 147,8  | 58.0,100.0       |
| chr2 | 96963954  | 96964640  | SNRNP200 | NM_014014 | 45 | 45 | 9,8,7 | 137.100.153 | 1529 | 71907  | 104,67 | 100.0,100.0,57.5 |
| chr2 | 96964949  | 96965149  | SNRNP200 | NM_014014 | 45 | 45 | 6     | 99          | 599  | 24593  | 122,35 | 83,8             |
| chr2 | 96966636  | 96966842  | SNRNP200 | NM_014014 | 45 | 45 | 5     | 56          | 475  | 20689  | 99,95  | 100              |
| chr2 | 96967188  | 96967385  | SNRNP200 | NM_014014 | 45 | 45 | 4     | 193         | 614  | 27433  | 138,55 | 64,2             |
| chr2 | 96968813  | 96969037  | SNRNP200 | NM_014014 | 45 | 45 | 3     | 172         | 1732 | 74029  | 329,02 | 82               |
| chr2 | 96970496  | 96970699  | SNRNP200 | NM_014014 | 45 | 45 | 2     | 164         | 108  | 4705   | 23,06  | 67,7             |
| chr2 | 96971027  | 96971230  | SNRNP200 | NM_014014 | 45 | 45 | 1     | 45          | 1473 | 66565  | 326,3  | 100              |
| chr2 | 97426657  | 97428235  | CNNM4    | NM_020184 | 7  | 7  | 1     | 1402        | 8060 | 389878 | 246,91 | 100              |
| chr2 | 97462795  | 97462974  | CNNM4    | NM_020184 | 7  | 7  | 2     | 144         | 265  | 9442   | 52,46  | 68,1             |
| chr2 | 97463219  | 97463425  | CNNM4    | NM_020184 | 7  | 7  | 3     | 135         | 563  | 24048  | 116,17 | 100              |
| chr2 | 97464778  | 97464963  | CNNM4    | NM_020184 | 7  | 7  | 4     | 170         | 1277 | 55690  | 299,41 | 100              |
| chr2 | 97465176  | 97465361  | CNNM4    | NM_020184 | 7  | 7  | 5     | 97          | 493  | 21554  | 115,88 | 75,3             |
| chr2 | 97474363  | 97474548  | CNNM4    | NM_020184 | 7  | 7  | 6     | 182         | 466  | 19111  | 102,75 | 64,3             |
| chr2 | 97475030  | 97475286  | CNNM4    | NM_020184 | 7  | 7  | 7     | 198         | 1306 | 59621  | 231,99 | 100              |
| chr2 | 98986343  | 98986537  | CNGA3    | NM_001298 | 8  | 7  | 2     | 101         | 465  | 19216  | 98,54  | 98               |
| chr2 | 98994055  | 98994231  | CNGA3    | NM_001298 | 8  | 7  | 3     | 114         | 145  | 5342   | 30,18  | 71,9             |
| chr2 | 98996651  | 98996857  | CNGA3    | NM_001298 | 8  | 7  | 4     | 180         | 186  | 7965   | 38,48  | 92,8             |
| chr2 | 98999711  | 98999917  | CNGA3    | NM_001298 | 8  | 7  | 5     | 54          | 225  | 9895   | 47,8   | 100              |
| chr2 | 99006018  | 99006233  | CNGA3    | NM_001298 | 8  | 7  | 6     | 117         | 372  | 15754  | 72,94  | 96,6             |
| chr2 | 99008219  | 99008419  | CNGA3    | NM_001298 | 8  | 7  | 7     | 107         | 834  | 36575  | 181,97 | 86,9             |
| chr2 | 99012229  | 99013813  | CNGA3    | NM_001298 | 8  | 7  | 8     | 1412        | 4025 | 194579 | 122,76 | 100              |
| chr2 | 110881272 | 110881721 | NPHP1    | NM_000272 | 20 | 20 | 20    | 273         | 701  | 33619  | 74,71  | 100              |
| chr2 | 110882773 | 110883272 | NPHP1    | NM_000272 | 20 | 20 | 19    | 45          | 1961 | 91153  | 182,31 | 100              |
| chr2 | 110886657 | 110886884 | NPHP1    | NM_000272 | 20 | 20 | 18    | 74          | 427  | 18989  | 83,29  | 100              |
| chr2 | 110889154 | 110889345 | NPHP1    | NM_000272 | 20 | 20 | 17    | 113         | 74   | 3276   | 17,06  | 79,6             |
| chr2 | 110901017 | 110901205 | NPHP1    | NM_000272 | 20 | 20 | 16    | 100         | 384  | 15826  | 83,74  | 87               |
| chr2 | 110902004 | 110902207 | NPHP1    | NM_000272 | 20 | 20 | 15    | 77          | 327  | 13360  | 65,49  | 100              |
| chr2 | 110904285 | 110904455 | NPHP1    | NM_000272 | 20 | 20 | 14    | 83          | 340  | 13912  | 81,36  | 100              |
| chr2 | 110905393 | 110905599 | NPHP1    | NM_000272 | 20 | 20 | 13    | 111         | 518  | 22809  | 110,19 | 96,4             |
| chr2 | 110907695 | 110907901 | NPHP1    | NM_000272 | 20 | 20 | 12    | 75          | 556  | 23813  | 115,04 | 100              |
| chr2 | 110917646 | 110917846 | NPHP1    | NM_000272 | 20 | 20 | 11    | 129         | 218  | 9770   | 48,61  | 100              |
| chr2 | 110919111 | 110919299 | NPHP1    | NM_000272 | 20 | 20 | 10    | 95          | 123  | 5803   | 30,7   | 100              |
| chr2 | 110920523 | 110920753 | NPHP1    | NM_000272 | 20 | 20 | 9     | 88          | 766  | 34400  | 148,92 | 100              |
| chr2 | 110922068 | 110922259 | NPHP1    | NM_000272 | 20 | 20 | 8     | 211         | 647  | 29304  | 152,63 | 77,3             |
| chr2 | 110922574 | 110922774 | NPHP1    | NM_000272 | 20 | 20 | 7     | 104         | 1948 | 86822  | 431,95 | 100              |
| chr2 | 110925955 | 110926143 | NPHP1    | NM_000272 | 20 | 20 | 6     | 102         | 609  | 21714  | 114,89 | 100              |
| chr2 | 110927312 | 110927503 | NPHP1    | NM_000272 | 20 | 20 | 5     | 193         | 1310 | 57254  | 298,2  | 62,7             |
| chr2 | 110935875 | 110936155 | NPHP1    | NM_000272 | 20 | 20 | 4     | 125         | 430  | 18681  | 66,48  | 100              |
| chr2 | 110937055 | 110937255 | NPHP1    | NM_000272 | 20 | 20 | 3     | 61          | 340  | 14900  | 74,13  | 90,2             |
| chr2 | 110958859 | 110959077 | NPHP1    | NM_000272 | 20 | 20 | 2     | 74          | 245  | 10105  | 46,14  | 100              |
| chr2 | 110962383 | 110962592 | NPHP1    | NM_000272 | 20 | 20 | 1     | 69          | 86   | 3406   | 16,22  | 100              |
| chr2 | 112656180 | 112656353 | MERTK    | NM_006343 | 19 | 19 | 1     | 61          | 19   | 809    | 4,65   | 67,2             |

|      |           |           |         |              |    |    |       |        |      |        |        |             |
|------|-----------|-----------|---------|--------------|----|----|-------|--------|------|--------|--------|-------------|
| chr2 | 112686671 | 112687132 | MERTK   | NM_006343    | 19 | 19 | 2     | 421    | 1263 | 58982  | 127,67 | 100         |
| chr2 | 112702450 | 112702644 | MERTK   | NM_006343    | 19 | 19 | 3     | 101    | 753  | 32272  | 165,5  | 100         |
| chr2 | 112704924 | 112705121 | MERTK   | NM_006343    | 19 | 19 | 4     | 174    | 149  | 5982   | 30,21  | 86,8        |
| chr2 | 112722641 | 112722859 | MERTK   | NM_006343    | 19 | 19 | 5     | 87     | 661  | 28476  | 130,03 | 100         |
| chr2 | 112725698 | 112725907 | MERTK   | NM_006343    | 19 | 19 | 6     | 116    | 871  | 40200  | 191,43 | 100         |
| chr2 | 112732827 | 112733015 | MERTK   | NM_006343    | 19 | 19 | 7     | 184    | 839  | 36536  | 193,31 | 81,5        |
| chr2 | 112740334 | 112740522 | MERTK   | NM_006343    | 19 | 19 | 8     | 152    | 438  | 20056  | 106,12 | 68,4        |
| chr2 | 112751871 | 112752148 | MERTK   | NM_006343    | 19 | 19 | 9     | 154    | 366  | 16294  | 58,61  | 72,1        |
| chr2 | 112754729 | 112755083 | MERTK   | NM_006343    | 19 | 19 | 10    | 154    | 859  | 41201  | 116,06 | 100         |
| chr2 | 112758702 | 112758887 | MERTK   | NM_006343    | 19 | 19 | 11    | 86     | 361  | 16100  | 86,56  | 100         |
| chr2 | 112760601 | 112760771 | MERTK   | NM_006343    | 19 | 19 | 12    | 96     | 141  | 5643   | 33     | 100         |
| chr2 | 112761393 | 112761587 | MERTK   | NM_006343    | 19 | 19 | 13    | 81     | 711  | 31563  | 161,86 | 100         |
| chr2 | 112766023 | 112766205 | MERTK   | NM_006343    | 19 | 19 | 14    | 93     | 294  | 12067  | 65,94  | 32,3        |
| chr2 | 112767421 | 112767793 | MERTK   | NM_006343    | 19 | 19 | 15    | 119    | 1052 | 49705  | 133,26 | 100         |
| chr2 | 112776886 | 112777083 | MERTK   | NM_006343    | 19 | 19 | 16    | 110    | 1176 | 52596  | 265,64 | 85,5        |
| chr2 | 112779041 | 112779253 | MERTK   | NM_006343    | 19 | 19 | 17    | 160    | 89   | 3801   | 17,85  | 73,8        |
| chr2 | 112779746 | 112780106 | MERTK   | NM_006343    | 19 | 19 | 18    | 137    | 787  | 37117  | 102,82 | 100         |
| chr2 | 112785834 | 112786508 | MERTK   | NM_006343    | 19 | 19 | 19    | 514    | 2278 | 107910 | 159,87 | 100         |
| chr2 | 170335940 | 170336137 | BBS5    | NM_152384    | 12 | 12 | 1     | 59     | 158  | 6665   | 33,66  | 100         |
| chr2 | 170338758 | 170338952 | BBS5    | NM_152384    | 12 | 12 | 2     | 83     | 131  | 5015   | 25,72  | 100         |
| chr2 | 170343466 | 170343642 | BBS5    | NM_152384    | 12 | 12 | 3     | 66     | 82   | 3108   | 17,56  | 97          |
| chr2 | 170344268 | 170344622 | BBS5    | NM_152384    | 12 | 12 | 4,5   | 50.128 | 524  | 23086  | 65,03  | 100.0,98.4  |
| chr2 | 170349423 | 170349611 | BBS5    | NM_152384    | 12 | 12 | 6     | 136    | 321  | 13697  | 72,47  | 71,3        |
| chr2 | 170350180 | 170350368 | BBS5    | NM_152384    | 12 | 12 | 7     | 96     | 81   | 3459   | 18,3   | 100         |
| chr2 | 170353992 | 170354210 | BBS5    | NM_152384    | 12 | 12 | 8     | 63     | 109  | 4342   | 19,83  | 100         |
| chr2 | 170355986 | 170356177 | BBS5    | NM_152384    | 12 | 12 | 9     | 135    | 243  | 10472  | 54,54  | 100         |
| chr2 | 170359546 | 170359731 | BBS5    | NM_152384    | 12 | 12 | 10    | 84     | 443  | 19100  | 102,69 | 100         |
| chr2 | 170360798 | 170361170 | BBS5    | NM_152384    | 12 | 12 | 11,12 | 24.102 | 1235 | 59495  | 159,5  | 100.0,100.0 |
| chr2 | 182402762 | 182403027 | CERKL   | NM_001030311 | 14 | 14 | 14    | 61     | 130  | 6140   | 23,08  | 100         |
| chr2 | 182403789 | 182403974 | CERKL   | NM_001030311 | 14 | 14 | 13    | 173    | 834  | 34702  | 186,57 | 90,2        |
| chr2 | 182409329 | 182409514 | CERKL   | NM_001030311 | 14 | 14 | 12    | 97     | 161  | 7001   | 37,64  | 90,7        |
| chr2 | 182412304 | 182412611 | CERKL   | NM_001030311 | 14 | 14 | 11,10 | 109,26 | 699  | 32624  | 105,92 | 100.0,100.0 |
| chr2 | 182413270 | 182413651 | CERKL   | NM_001030311 | 14 | 14 | 9,8   | 60.178 | 695  | 31575  | 82,66  | 100.0,100.0 |
| chr2 | 182414336 | 182414515 | CERKL   | NM_001030311 | 14 | 14 | 7     | 75     | 685  | 27886  | 154,92 | 100         |
| chr2 | 182423338 | 182423511 | CERKL   | NM_001030311 | 14 | 14 | 6     | 143    | 293  | 13141  | 75,52  | 68,5        |
| chr2 | 182430113 | 182430283 | CERKL   | NM_001030311 | 14 | 14 | 5     | 78     | 223  | 9221   | 53,92  | 100         |
| chr2 | 182430716 | 182430904 | CERKL   | NM_001030311 | 14 | 14 | 4     | 64     | 338  | 14666  | 77,6   | 100         |
| chr2 | 182438481 | 182438660 | CERKL   | NM_001030311 | 14 | 14 | 3     | 132    | 723  | 31317  | 173,98 | 99,2        |
| chr2 | 182468449 | 182468809 | CERKL   | NM_001030311 | 14 | 14 | 2     | 243    | 470  | 21003  | 58,18  | 100         |
| chr2 | 182521543 | 182522149 | CERKL   | NM_001030311 | 14 | 14 | 1     | 238    | 535  | 23795  | 39,2   | 80,3        |
| chr2 | 202488870 | 202488990 | TMEM237 | NM_001044385 | 12 | 12 | 12    | 68     | 101  | 4216   | 34,84  | 19,1        |
| chr2 | 202490724 | 202490894 | TMEM237 | NM_001044385 | 12 | 12 | 11    | 122    | 79   | 2992   | 17,5   | 100         |
| chr2 | 202491975 | 202492157 | TMEM237 | NM_001044385 | 12 | 12 | 10    | 94     | 509  | 22213  | 121,38 | 100         |
| chr2 | 202492733 | 202492924 | TMEM237 | NM_001044385 | 12 | 12 | 9     | 74     | 237  | 10370  | 54,01  | 100         |
| chr2 | 202493978 | 202494178 | TMEM237 | NM_001044385 | 12 | 12 | 8     | 192    | 336  | 14690  | 73,08  | 87          |
| chr2 | 202494488 | 202494679 | TMEM237 | NM_001044385 | 12 | 12 | 7     | 124    | 195  | 7003   | 36,47  | 71          |
| chr2 | 202496720 | 202496941 | TMEM237 | NM_001044385 | 12 | 12 | 6     | 158    | 293  | 12986  | 58,5   | 100         |
| chr2 | 202497978 | 202498163 | TMEM237 | NM_001044385 | 12 | 12 | 5     | 121    | 280  | 12307  | 66,17  | 100         |
| chr2 | 202501424 | 202501645 | TMEM237 | NM_001044385 | 12 | 12 | 4     | 138    | 129  | 5360   | 24,14  | 100         |
| chr2 | 202503660 | 202503878 | TMEM237 | NM_001044385 | 12 | 12 | 3     | 62     | 153  | 6301   | 28,77  | 100         |
| chr2 | 202505537 | 202505719 | TMEM237 | NM_001044385 | 12 | 12 | 2     | 32     | 186  | 8148   | 44,52  | 100         |
| chr2 | 202508003 | 202508197 | TMEM237 | NM_001044385 | 12 | 12 | 1     | 42     | 41   | 1835   | 9,41   | 100         |
| chr2 | 233632754 | 233633538 | KCNJ13  | NM_002242    | 3  | 2  | 3     | 623    | 2429 | 118622 | 151,11 | 100         |
| chr2 | 233635590 | 233636122 | KCNJ13  | NM_002242    | 3  | 2  | 2     | 460    | 1756 | 85961  | 161,28 | 100         |



|      |           |           |        |              |    |    |       |             |      |        |        |                   |
|------|-----------|-----------|--------|--------------|----|----|-------|-------------|------|--------|--------|-------------------|
| chr2 | 233641054 | 233641260 | KCNJ13 | NM_002242    | 3  | 2  | 1     | 121         | 353  | 15563  | 75,18  | 87,6              |
| chr2 | 234217719 | 234217949 | SAG    | NM_000541    | 16 | 15 | 2     | 75          | 410  | 18486  | 80,03  | 100               |
| chr2 | 234224725 | 234224922 | SAG    | NM_000541    | 16 | 15 | 3     | 61          | 590  | 26353  | 133,1  | 93,4              |
| chr2 | 234227308 | 234227618 | SAG    | NM_000541    | 16 | 15 | 4     | 45          | 256  | 11962  | 38,46  | 100               |
| chr2 | 234229242 | 234229439 | SAG    | NM_000541    | 16 | 15 | 5     | 194         | 405  | 16848  | 85,09  | 84,5              |
| chr2 | 234231530 | 234231715 | SAG    | NM_000541    | 16 | 15 | 6     | 60          | 451  | 19503  | 104,85 | 100               |
| chr2 | 234235750 | 234235941 | SAG    | NM_000541    | 16 | 15 | 7     | 77          | 333  | 13943  | 72,62  | 100               |
| chr2 | 234237031 | 234237225 | SAG    | NM_000541    | 16 | 15 | 8     | 136         | 536  | 22280  | 114,26 | 75                |
| chr2 | 234238011 | 234238220 | SAG    | NM_000541    | 16 | 15 | 9     | 85          | 334  | 14336  | 68,27  | 96,5              |
| chr2 | 234240296 | 234240487 | SAG    | NM_000541    | 16 | 15 | 10    | 73          | 1702 | 72301  | 376,57 | 86,3              |
| chr2 | 234243516 | 234243713 | SAG    | NM_000541    | 16 | 15 | 11    | 138         | 119  | 5066   | 25,59  | 76,8              |
| chr2 | 234247287 | 234247493 | SAG    | NM_000541    | 16 | 15 | 12    | 78          | 284  | 12783  | 61,75  | 100               |
| chr2 | 234249051 | 234249251 | SAG    | NM_000541    | 16 | 15 | 13    | 24          | 164  | 7203   | 35,84  | 100               |
| chr2 | 234250944 | 234251123 | SAG    | NM_000541    | 16 | 15 | 14    | 56          | 194  | 8399   | 46,66  | 51,8              |
| chr2 | 234254905 | 234255078 | SAG    | NM_000541    | 16 | 15 | 15    | 10          | 712  | 29607  | 170,16 | 100               |
| chr2 | 234255373 | 234255656 | SAG    | NM_000541    | 16 | 15 | 16    | 106         | 671  | 28918  | 101,82 | 100               |
| chr3 | 45867661  | 45867831  | LZTFL1 | NM_020347    | 10 | 10 | 10    | 19          | 274  | 11062  | 64,69  | 100               |
| chr3 | 45868772  | 45868954  | LZTFL1 | NM_020347    | 10 | 10 | 9     | 104         | 775  | 33042  | 180,56 | 100               |
| chr3 | 45869873  | 45870103  | LZTFL1 | NM_020347    | 10 | 10 | 8     | 177         | 617  | 26626  | 115,26 | 97,7              |
| chr3 | 45872362  | 45872639  | LZTFL1 | NM_020347    | 10 | 10 | 7,6   | 78,66       | 716  | 31184  | 112,17 | 100,0,100,0       |
| chr3 | 45874417  | 45874602  | LZTFL1 | NM_020347    | 10 | 10 | 5     | 72          | 538  | 23251  | 125,01 | 84,7              |
| chr3 | 45875689  | 45875904  | LZTFL1 | NM_020347    | 10 | 10 | 4     | 61          | 45   | 1852   | 8,57   | 100               |
| chr3 | 45877051  | 45877254  | LZTFL1 | NM_020347    | 10 | 10 | 3     | 195         | 280  | 12478  | 61,17  | 88,7              |
| chr3 | 45879431  | 45879637  | LZTFL1 | NM_020347    | 10 | 10 | 2     | 125         | 176  | 7657   | 36,99  | 90,4              |
| chr3 | 50229020  | 50229232  | GNAT1  | NM_144499    | 9  | 8  | 1     | 106         | 217  | 9122   | 42,83  | 69,8              |
| chr3 | 50230634  | 50231364  | GNAT1  | NM_144499    | 9  | 8  | 3,4,5 | 142.158.129 | 1315 | 60822  | 83,2   | 100,0,100,0,100,0 |
| chr3 | 50231561  | 50231740  | GNAT1  | NM_144499    | 9  | 8  | 6     | 130         | 55   | 2474   | 13,74  | 72,3              |
| chr3 | 50231985  | 50232425  | GNAT1  | NM_144499    | 9  | 8  | 7,8   | 154.191     | 697  | 31277  | 70,92  | 66,9,100,0        |
| chr3 | 97486909  | 97487085  | ARL6   | NM_032146    | 9  | 7  | 3     | 123         | 241  | 10380  | 58,64  | 100               |
| chr3 | 97498945  | 97499139  | ARL6   | NM_032146    | 9  | 7  | 4     | 62          | 225  | 9889   | 50,71  | 100               |
| chr3 | 97499431  | 97499619  | ARL6   | NM_032146    | 9  | 7  | 5     | 69          | 418  | 18883  | 99,91  | 100               |
| chr3 | 97503787  | 97503969  | ARL6   | NM_032146    | 9  | 7  | 6     | 95          | 810  | 34258  | 187,2  | 100               |
| chr3 | 97506837  | 97507028  | ARL6   | NM_032146    | 9  | 7  | 7     | 130         | 269  | 11166  | 58,16  | 97,7              |
| chr3 | 97510551  | 97510730  | ARL6   | NM_032146    | 9  | 7  | 8     | 56          | 233  | 9947   | 55,26  | 100               |
| chr3 | 97516862  | 97517065  | ARL6   | NM_032146    | 9  | 7  | 9     | 26          | 268  | 11038  | 54,11  | 100               |
| chr3 | 100947553 | 100947735 | IMPG2  | NM_016247    | 19 | 19 | 18    | 80          | 35   | 1524   | 8,33   | 100               |
| chr3 | 100948297 | 100948497 | IMPG2  | NM_016247    | 19 | 19 | 17    | 211         | 241  | 10134  | 50,42  | 65,4              |
| chr3 | 100949749 | 100949955 | IMPG2  | NM_016247    | 19 | 19 | 16    | 189         | 1615 | 68409  | 330,48 | 82                |
| chr3 | 100951647 | 100951868 | IMPG2  | NM_016247    | 19 | 19 | 15    | 211         | 544  | 23431  | 105,55 | 89,6              |
| chr3 | 100961486 | 100961766 | IMPG2  | NM_016247    | 19 | 19 | 14    | 220         | 924  | 43785  | 155,82 | 100               |
| chr3 | 100962308 | 100963631 | IMPG2  | NM_016247    | 19 | 19 | 13    | 1259        | 4927 | 239898 | 181,19 | 100               |
| chr3 | 100964563 | 100964917 | IMPG2  | NM_016247    | 19 | 19 | 12    | 304         | 1518 | 68198  | 192,11 | 89,5              |
| chr3 | 100972485 | 100972691 | IMPG2  | NM_016247    | 19 | 19 | 11    | 86          | 572  | 24442  | 118,08 | 100               |
| chr3 | 100976300 | 100976571 | IMPG2  | NM_016247    | 19 | 19 | 10    | 245         | 528  | 24641  | 90,59  | 81,2              |
| chr3 | 100986210 | 100986395 | IMPG2  | NM_016247    | 19 | 19 | 9     | 21          | 430  | 18919  | 101,72 | 100               |
| chr3 | 100988302 | 100988484 | IMPG2  | NM_016247    | 19 | 19 | 8     | 59          | 199  | 8798   | 48,08  | 100               |
| chr3 | 100992402 | 100992605 | IMPG2  | NM_016247    | 19 | 19 | 7     | 162         | 287  | 11928  | 58,47  | 100               |
| chr3 | 100994432 | 100994662 | IMPG2  | NM_016247    | 19 | 19 | 6     | 83          | 368  | 16844  | 72,92  | 100               |
| chr3 | 100995483 | 100995692 | IMPG2  | NM_016247    | 19 | 19 | 5     | 50          | 52   | 2380   | 11,33  | 100               |
| chr3 | 101010175 | 101010369 | IMPG2  | NM_016247    | 19 | 19 | 4     | 32          | 293  | 13052  | 66,93  | 100               |
| chr3 | 101022909 | 101023118 | IMPG2  | NM_016247    | 19 | 19 | 3     | 167         | 133  | 5757   | 27,41  | 77,2              |
| chr3 | 101038435 | 101038712 | IMPG2  | NM_016247    | 19 | 19 | 2     | 249         | 968  | 45681  | 164,32 | 97,2              |
| chr3 | 101039129 | 101039311 | IMPG2  | NM_016247    | 19 | 19 | 1     | 85          | 144  | 5835   | 31,89  | 100               |
| chr3 | 121489105 | 121489373 | IQCB1  | NM_001023570 | 15 | 13 | 15    | 230         | 1246 | 55131  | 204,95 | 79,1              |

|      |           |           |        |              |    |    |                |                    |      |        |        |                              |
|------|-----------|-----------|--------|--------------|----|----|----------------|--------------------|------|--------|--------|------------------------------|
| chr3 | 121491318 | 121491509 | IQCB1  | NM_001023570 | 15 | 13 | 14             | 157                | 171  | 7360   | 38,33  | 67,5                         |
| chr3 | 121500627 | 121500815 | IQCB1  | NM_001023570 | 15 | 13 | 13             | 132                | 78   | 2745   | 14,52  | 72                           |
| chr3 | 121507179 | 121507355 | IQCB1  | NM_001023570 | 15 | 13 | 12             | 149                | 571  | 24916  | 140,77 | 67,8                         |
| chr3 | 121508965 | 121509153 | IQCB1  | NM_001023570 | 15 | 13 | 11             | 143                | 66   | 2464   | 13,04  | 68,5                         |
| chr3 | 121514333 | 121514503 | IQCB1  | NM_001023570 | 15 | 13 | 10             | 110                | 117  | 3938   | 23,03  | 73,6                         |
| chr3 | 121515994 | 121516170 | IQCB1  | NM_001023570 | 15 | 13 | 9              | 110                | 81   | 3435   | 19,41  | 73,6                         |
| chr3 | 121518106 | 121518288 | IQCB1  | NM_001023570 | 15 | 13 | 8              | 179                | 104  | 4452   | 24,33  | 64,8                         |
| chr3 | 121526215 | 121526415 | IQCB1  | NM_001023570 | 15 | 13 | 7              | 100                | 185  | 6889   | 34,27  | 76                           |
| chr3 | 121527784 | 121527972 | IQCB1  | NM_001023570 | 15 | 13 | 6              | 94                 | 241  | 8846   | 46,8   | 77,7                         |
| chr3 | 121544937 | 121545122 | IQCB1  | NM_001023570 | 15 | 13 | 5              | 130                | 61   | 2623   | 14,1   | 70                           |
| chr3 | 121547267 | 121547452 | IQCB1  | NM_001023570 | 15 | 13 | 4              | 163                | 423  | 19141  | 102,91 | 83,4                         |
| chr3 | 121547731 | 121547907 | IQCB1  | NM_001023570 | 15 | 13 | 3              | 100                | 203  | 8112   | 45,83  | 77                           |
| chr3 | 129247502 | 129247924 | RHO    | NM_000539    | 5  | 5  | 1              | 361                | 1761 | 81265  | 192,12 | 96,4                         |
| chr3 | 129249630 | 129249839 | RHO    | NM_000539    | 5  | 5  | 2              | 169                | 359  | 15494  | 73,78  | 71,6                         |
| chr3 | 129251109 | 129251614 | RHO    | NM_000539    | 5  | 5  | 3,4            | 166.240            | 1572 | 66478  | 131,38 | 91,0,99.6                    |
| chr3 | 129252495 | 129252716 | RHO    | NM_000539    | 5  | 5  | 5              | 111                | 260  | 11229  | 50,58  | 60,4                         |
| chr3 | 132400632 | 132400903 | NPHP3  | NM_153240    | 27 | 27 | 27             | 181                | 964  | 44635  | 164,1  | 82,9                         |
| chr3 | 132401486 | 132401665 | NPHP3  | NM_153240    | 27 | 27 | 26             | 116                | 844  | 33851  | 188,06 | 100                          |
| chr3 | 132402211 | 132402390 | NPHP3  | NM_153240    | 27 | 27 | 25             | 126                | 427  | 17469  | 97,05  | 100                          |
| chr3 | 132403428 | 132403717 | NPHP3  | NM_153240    | 27 | 27 | 24             | 241                | 222  | 9868   | 34,03  | 87,6                         |
| chr3 | 132405073 | 132405273 | NPHP3  | NM_153240    | 27 | 27 | 23             | 128                | 111  | 4773   | 23,75  | 100                          |
| chr3 | 132405884 | 132406063 | NPHP3  | NM_153240    | 27 | 27 | 22             | 76                 | 253  | 10855  | 60,31  | 90,8                         |
| chr3 | 132407491 | 132408085 | NPHP3  | NM_153240    | 27 | 27 | 21,20          | 242.190            | 4612 | 216117 | 363,22 | 100,0,88.4                   |
| chr3 | 132409359 | 132409577 | NPHP3  | NM_153240    | 27 | 27 | 19             | 123                | 226  | 9977   | 45,56  | 100                          |
| chr3 | 132409982 | 132410170 | NPHP3  | NM_153240    | 27 | 27 | 18             | 95                 | 279  | 11279  | 59,68  | 100                          |
| chr3 | 132411491 | 132411691 | NPHP3  | NM_153240    | 27 | 27 | 17             | 165                | 533  | 23274  | 115,79 | 100                          |
| chr3 | 132413615 | 132413806 | NPHP3  | NM_153240    | 27 | 27 | 16             | 139                | 1174 | 54151  | 282,04 | 97,8                         |
| chr3 | 132415578 | 132415769 | NPHP3  | NM_153240    | 27 | 27 | 15             | 83                 | 1224 | 48826  | 254,3  | 96,4                         |
| chr3 | 132416024 | 132416218 | NPHP3  | NM_153240    | 27 | 27 | 14             | 103                | 433  | 17654  | 90,53  | 100                          |
| chr3 | 132418130 | 132418303 | NPHP3  | NM_153240    | 27 | 27 | 13             | 98                 | 201  | 8749   | 50,28  | 100                          |
| chr3 | 132418688 | 132418861 | NPHP3  | NM_153240    | 27 | 27 | 12             | 144                | 418  | 17100  | 98,28  | 69,4                         |
| chr3 | 132419143 | 132419328 | NPHP3  | NM_153240    | 27 | 27 | 11             | 115                | 214  | 8798   | 47,3   | 100                          |
| chr3 | 132420219 | 132420434 | NPHP3  | NM_153240    | 27 | 27 | 10             | 104                | 112  | 5059   | 23,42  | 100                          |
| chr3 | 132423028 | 132423243 | NPHP3  | NM_153240    | 27 | 27 | 9              | 174                | 937  | 38333  | 177,47 | 100                          |
| chr3 | 132424553 | 132424750 | NPHP3  | NM_153240    | 27 | 27 | 8              | 75                 | 160  | 7550   | 38,13  | 100                          |
| chr3 | 132426943 | 132427164 | NPHP3  | NM_153240    | 27 | 27 | 7              | 157                | 215  | 9268   | 41,75  | 100                          |
| chr3 | 132432012 | 132432194 | NPHP3  | NM_153240    | 27 | 27 | 6              | 161                | 156  | 6490   | 35,46  | 73,9                         |
| chr3 | 132433898 | 132434092 | NPHP3  | NM_153240    | 27 | 27 | 5              | 134                | 249  | 11028  | 56,55  | 100                          |
| chr3 | 132435591 | 132435821 | NPHP3  | NM_153240    | 27 | 27 | 4              | 153                | 384  | 16450  | 71,21  | 100                          |
| chr3 | 132437803 | 132438006 | NPHP3  | NM_153240    | 27 | 27 | 3              | 151                | 972  | 40833  | 200,16 | 100                          |
| chr3 | 132438511 | 132438708 | NPHP3  | NM_153240    | 27 | 27 | 2              | 126                | 335  | 13933  | 70,37  | 100                          |
| chr3 | 132440564 | 132441230 | NPHP3  | NM_153240    | 27 | 27 | 1              | 393                | 328  | 15181  | 22,76  | 100                          |
| chr3 | 150645674 | 150646010 | CLRN1  | NM_174878    | 3  | 3  | 3              | 266                | 464  | 20861  | 61,9   | 100                          |
| chr3 | 150659331 | 150659531 | CLRN1  | NM_174878    | 3  | 3  | 2              | 180                | 310  | 13066  | 65     | 90,6                         |
| chr3 | 150690150 | 150690584 | CLRN1  | NM_174878    | 3  | 3  | 1              | 253                | 3327 | 159564 | 366,81 | 100                          |
| chr3 | 184033152 | 184033429 | EIF4G1 | NM_182917    | 32 | 31 | 1              | 382                | 287  | 13028  | 46,86  | 47,6                         |
| chr3 | 184033472 | 184033666 | EIF4G1 | NM_182917    | 32 | 31 | 2              | 60                 | 110  | 4501   | 23,08  | 100                          |
| chr3 | 184033806 | 184033997 | EIF4G1 | NM_182917    | 32 | 31 | 3              | 87                 | 421  | 18121  | 94,38  | 89,7                         |
| chr3 | 184035027 | 184035248 | EIF4G1 | NM_182917    | 32 | 31 | 4              | 177                | 477  | 19799  | 89,18  | 79,1                         |
| chr3 | 184035514 | 184035729 | EIF4G1 | NM_182917    | 32 | 31 | 5              | 100                | 232  | 10416  | 48,22  | 91                           |
| chr3 | 184037483 | 184037698 | EIF4G1 | NM_182917    | 32 | 31 | 6              | 113                | 153  | 6385   | 29,56  | 94,7                         |
| chr3 | 184038333 | 184038856 | EIF4G1 | NM_182917    | 32 | 31 | 7,8            | 93,67              | 978  | 46975  | 89,65  | 100,0,100.0                  |
| chr3 | 184039135 | 184039972 | EIF4G1 | NM_182917    | 32 | 31 | 9              | 822                | 3562 | 172628 | 206    | 92,1                         |
| chr3 | 184040127 | 184041367 | EIF4G1 | NM_182917    | 32 | 31 | 10,11,12,13,14 | 89.187.134.159.189 | 3405 | 165383 | 133,27 | 100,0,100,0,100,0,100,0,92.6 |

|      |           |           |        |           |    |    |             |                 |      |        |        |                        |
|------|-----------|-----------|--------|-----------|----|----|-------------|-----------------|------|--------|--------|------------------------|
| chr3 | 184041596 | 184041793 | EIF4G1 | NM_182917 | 32 | 31 | 15          | 198             | 536  | 23453  | 118,45 | 85,9                   |
| chr3 | 184042000 | 184042176 | EIF4G1 | NM_182917 | 32 | 31 | 16          | 147             | 287  | 12020  | 67,91  | 92,5                   |
| chr3 | 184042724 | 184043810 | EIF4G1 | NM_182917 | 32 | 31 | 17,18,19,20 | 237.105.160.101 | 3035 | 146795 | 135,05 | 75.5,100.0,100.0,100.0 |
| chr3 | 184044190 | 184044405 | EIF4G1 | NM_182917 | 32 | 31 | 21          | 103             | 718  | 33108  | 153,28 | 88,3                   |
| chr3 | 184044556 | 184044753 | EIF4G1 | NM_182917 | 32 | 31 | 22          | 103             | 459  | 18818  | 95,04  | 82,5                   |
| chr3 | 184044901 | 184045771 | EIF4G1 | NM_182917 | 32 | 31 | 23,24,25    | 233.119.173     | 1300 | 59511  | 68,32  | 100.0,100.0,89.0       |
| chr3 | 184046388 | 184046745 | EIF4G1 | NM_182917 | 32 | 31 | 26,27       | 126,82          | 897  | 39912  | 111,49 | 100.0,59.8             |
| chr3 | 184048968 | 184049814 | EIF4G1 | NM_182917 | 32 | 31 | 28,29,30,31 | 99,135,82,141   | 2223 | 105683 | 124,77 | 100.0,100.0,100.0,57.4 |
| chr3 | 184052543 | 184052743 | EIF4G1 | NM_182917 | 32 | 31 | 32          | 182             | 279  | 12734  | 63,35  | 84,6                   |
| chr3 | 193332520 | 193332889 | OPA1   | NM_015560 | 29 | 28 | 2           | 319             | 941  | 42263  | 114,22 | 97,5                   |
| chr3 | 193333416 | 193333610 | OPA1   | NM_015560 | 29 | 28 | 3           | 97              | 384  | 16515  | 84,69  | 100                    |
| chr3 | 193334929 | 193335105 | OPA1   | NM_015560 | 29 | 28 | 4           | 108             | 632  | 25281  | 142,83 | 100                    |
| chr3 | 193336576 | 193336755 | OPA1   | NM_015560 | 29 | 28 | 5           | 68              | 264  | 11142  | 61,9   | 100                    |
| chr3 | 193349336 | 193349518 | OPA1   | NM_015560 | 29 | 28 | 6           | 54              | 284  | 12710  | 69,45  | 100                    |
| chr3 | 193353197 | 193353391 | OPA1   | NM_015560 | 29 | 28 | 7           | 105             | 119  | 4831   | 24,77  | 100                    |
| chr3 | 193354986 | 193355171 | OPA1   | NM_015560 | 29 | 28 | 8           | 87              | 70   | 2746   | 14,76  | 97,7                   |
| chr3 | 193355745 | 193355969 | OPA1   | NM_015560 | 29 | 28 | 9           | 114             | 234  | 10176  | 45,23  | 96,5                   |
| chr3 | 193360546 | 193360850 | OPA1   | NM_015560 | 29 | 28 | 10,11       | 81,75           | 412  | 18134  | 59,46  | 100.0,100.0            |
| chr3 | 193361115 | 193361410 | OPA1   | NM_015560 | 29 | 28 | 12,13       | 72,100          | 426  | 18759  | 63,38  | 100.0,94.0             |
| chr3 | 193361746 | 193361970 | OPA1   | NM_015560 | 29 | 28 | 14          | 131             | 162  | 6921   | 30,76  | 100                    |
| chr3 | 193363310 | 193363602 | OPA1   | NM_015560 | 29 | 28 | 15,16       | 73,73           | 122  | 4934   | 16,84  | 100.0,100.0            |
| chr3 | 193364847 | 193365041 | OPA1   | NM_015560 | 29 | 28 | 17          | 116             | 292  | 12480  | 64     | 100                    |
| chr3 | 193365745 | 193365954 | OPA1   | NM_015560 | 29 | 28 | 18          | 65              | 376  | 16257  | 77,41  | 100                    |
| chr3 | 193366470 | 193366661 | OPA1   | NM_015560 | 29 | 28 | 19          | 77              | 203  | 9274   | 48,3   | 100                    |
| chr3 | 193372636 | 193372827 | OPA1   | NM_015560 | 29 | 28 | 20          | 166             | 199  | 8508   | 44,31  | 100                    |
| chr3 | 193374859 | 193375029 | OPA1   | NM_015560 | 29 | 28 | 21          | 153             | 207  | 9047   | 52,91  | 100                    |
| chr3 | 193376659 | 193376859 | OPA1   | NM_015560 | 29 | 28 | 22          | 109             | 290  | 12808  | 63,72  | 100                    |
| chr3 | 193377222 | 193377410 | OPA1   | NM_015560 | 29 | 28 | 23          | 80              | 167  | 6958   | 36,81  | 100                    |
| chr3 | 193380607 | 193380810 | OPA1   | NM_015560 | 29 | 28 | 24          | 141             | 97   | 4040   | 19,8   | 100                    |
| chr3 | 193382629 | 193382832 | OPA1   | NM_015560 | 29 | 28 | 25          | 117             | 151  | 6909   | 33,87  | 100                    |
| chr3 | 193384043 | 193384219 | OPA1   | NM_015560 | 29 | 28 | 26          | 94              | 224  | 9165   | 51,78  | 100                    |
| chr3 | 193384900 | 193385168 | OPA1   | NM_015560 | 29 | 28 | 27          | 111             | 994  | 43253  | 160,79 | 100                    |
| chr3 | 193409845 | 193410054 | OPA1   | NM_015560 | 29 | 28 | 28          | 65              | 127  | 5481   | 26,1   | 100                    |
| chr4 | 619317    | 619816    | PDE6B  | NM_000283 | 22 | 22 | 1           | 468             | 594  | 27712  | 55,42  | 85,7                   |
| chr4 | 628438    | 628626    | PDE6B  | NM_000283 | 22 | 22 | 2           | 153             | 251  | 10707  | 56,65  | 100                    |
| chr4 | 629562    | 629738    | PDE6B  | NM_000283 | 22 | 22 | 3           | 90              | 522  | 20855  | 117,82 | 77,8                   |
| chr4 | 647616    | 648115    | PDE6B  | NM_000283 | 22 | 22 | 4,5         | 141,75          | 248  | 11373  | 22,75  | 100.0,100.0            |
| chr4 | 648520    | 648708    | PDE6B  | NM_000283 | 22 | 22 | 6           | 65              | 546  | 23130  | 122,38 | 100                    |
| chr4 | 649700    | 649879    | PDE6B  | NM_000283 | 22 | 22 | 7           | 67              | 215  | 8704   | 48,36  | 100                    |
| chr4 | 649927    | 650112    | PDE6B  | NM_000283 | 22 | 22 | 8           | 48              | 371  | 15742  | 84,63  | 100                    |
| chr4 | 650652    | 650822    | PDE6B  | NM_000283 | 22 | 22 | 9           | 150             | 315  | 13334  | 77,98  | 100                    |
| chr4 | 651096    | 651281    | PDE6B  | NM_000283 | 22 | 22 | 10          | 144             | 149  | 6670   | 35,86  | 98,6                   |
| chr4 | 652619    | 652816    | PDE6B  | NM_000283 | 22 | 22 | 11          | 66              | 672  | 29498  | 148,98 | 100                    |
| chr4 | 654189    | 654398    | PDE6B  | NM_000283 | 22 | 22 | 12          | 147             | 229  | 8417   | 40,08  | 97,3                   |
| chr4 | 655933    | 656133    | PDE6B  | NM_000283 | 22 | 22 | 13          | 108             | 349  | 14610  | 72,69  | 90,7                   |
| chr4 | 656303    | 656506    | PDE6B  | NM_000283 | 22 | 22 | 14          | 110             | 279  | 12698  | 62,25  | 95,5                   |
| chr4 | 656790    | 657002    | PDE6B  | NM_000283 | 22 | 22 | 15          | 88              | 149  | 6808   | 31,96  | 100                    |
| chr4 | 657493    | 657663    | PDE6B  | NM_000283 | 22 | 22 | 16          | 101             | 350  | 15270  | 89,3   | 100                    |
| chr4 | 657841    | 658017    | PDE6B  | NM_000283 | 22 | 22 | 17          | 108             | 124  | 5261   | 29,72  | 100                    |
| chr4 | 658574    | 658774    | PDE6B  | NM_000283 | 22 | 22 | 18          | 64              | 120  | 5183   | 25,79  | 100                    |
| chr4 | 659046    | 659249    | PDE6B  | NM_000283 | 22 | 22 | 19          | 75              | 266  | 11753  | 57,61  | 97,3                   |
| chr4 | 660282    | 660479    | PDE6B  | NM_000283 | 22 | 22 | 20          | 84              | 73   | 3374   | 17,04  | 100                    |
| chr4 | 661625    | 661810    | PDE6B  | NM_000283 | 22 | 22 | 21          | 151             | 347  | 15022  | 80,76  | 100                    |
| chr4 | 663815    | 664012    | PDE6B  | NM_000283 | 22 | 22 | 22          | 62              | 446  | 19662  | 99,3   | 100                    |

|      |          |          |        |              |    |    |    |      |      |        |        |      |
|------|----------|----------|--------|--------------|----|----|----|------|------|--------|--------|------|
| chr4 | 6279081  | 6279373  | WFS1   | NM_006005    | 8  | 7  | 2  | 232  | 148  | 6075   | 20,73  | 82,3 |
| chr4 | 6288700  | 6288885  | WFS1   | NM_006005    | 8  | 7  | 3  | 83   | 495  | 19949  | 107,25 | 79,5 |
| chr4 | 6290748  | 6290951  | WFS1   | NM_006005    | 8  | 7  | 4  | 145  | 30   | 1316   | 6,45   | 76,6 |
| chr4 | 6292833  | 6293045  | WFS1   | NM_006005    | 8  | 7  | 5  | 171  | 413  | 16844  | 79,08  | 71,3 |
| chr4 | 6293514  | 6293720  | WFS1   | NM_006005    | 8  | 7  | 6  | 81   | 26   | 991    | 4,79   | 95,1 |
| chr4 | 6296697  | 6296879  | WFS1   | NM_006005    | 8  | 7  | 7  | 149  | 309  | 13719  | 74,97  | 75,2 |
| chr4 | 6302407  | 6304281  | WFS1   | NM_006005    | 8  | 7  | 8  | 1812 | 5669 | 270586 | 144,31 | 98,7 |
| chr4 | 13370088 | 13370208 | RAB28  | NM_001017979 | 7  | 7  | 7  | 93   | 204  | 7228   | 59,74  | 29   |
| chr4 | 13378182 | 13378355 | RAB28  | NM_001017979 | 7  | 7  | 6  | 78   | 69   | 2611   | 15,01  | 83,3 |
| chr4 | 13462260 | 13462460 | RAB28  | NM_001017979 | 7  | 7  | 4  | 130  | 431  | 17035  | 84,75  | 100  |
| chr4 | 13475682 | 13475971 | RAB28  | NM_001017979 | 7  | 7  | 3  | 89   | 1000 | 47105  | 162,43 | 33,7 |
| chr4 | 13480953 | 13481150 | RAB28  | NM_001017979 | 7  | 7  | 2  | 97   | 291  | 12155  | 61,39  | 100  |
| chr4 | 13485658 | 13485935 | RAB28  | NM_001017979 | 7  | 7  | 1  | 75   | 36   | 1427   | 5,13   | 100  |
| chr4 | 15477439 | 15477621 | CC2D2A | NM_001080522 | 38 | 36 | 3  | 39   | 126  | 5207   | 28,45  | 100  |
| chr4 | 15480222 | 15480422 | CC2D2A | NM_001080522 | 38 | 36 | 4  | 84   | 213  | 8915   | 44,35  | 90,5 |
| chr4 | 15482349 | 15482558 | CC2D2A | NM_001080522 | 38 | 36 | 5  | 124  | 407  | 17479  | 83,23  | 83,1 |
| chr4 | 15504019 | 15504240 | CC2D2A | NM_001080522 | 38 | 36 | 6  | 89   | 159  | 7126   | 32,1   | 100  |
| chr4 | 15504380 | 15504610 | CC2D2A | NM_001080522 | 38 | 36 | 7  | 102  | 344  | 13504  | 58,46  | 100  |
| chr4 | 15511670 | 15511882 | CC2D2A | NM_001080522 | 38 | 36 | 8  | 102  | 201  | 8065   | 37,86  | 100  |
| chr4 | 15512820 | 15513079 | CC2D2A | NM_001080522 | 38 | 36 | 9  | 177  | 474  | 20953  | 80,59  | 100  |
| chr4 | 15516295 | 15516519 | CC2D2A | NM_001080522 | 38 | 36 | 10 | 163  | 380  | 16170  | 71,87  | 100  |
| chr4 | 15517410 | 15517583 | CC2D2A | NM_001080522 | 38 | 36 | 11 | 137  | 89   | 3671   | 21,1   | 67,9 |
| chr4 | 15518198 | 15518422 | CC2D2A | NM_001080522 | 38 | 36 | 12 | 132  | 370  | 16238  | 72,17  | 100  |
| chr4 | 15529125 | 15529334 | CC2D2A | NM_001080522 | 38 | 36 | 13 | 210  | 233  | 10422  | 49,63  | 73,8 |
| chr4 | 15530198 | 15530380 | CC2D2A | NM_001080522 | 38 | 36 | 14 | 107  | 372  | 16629  | 90,87  | 100  |
| chr4 | 15534800 | 15534970 | CC2D2A | NM_001080522 | 38 | 36 | 15 | 141  | 60   | 2486   | 14,54  | 100  |
| chr4 | 15538520 | 15538708 | CC2D2A | NM_001080522 | 38 | 36 | 16 | 157  | 35   | 1542   | 8,16   | 100  |
| chr4 | 15539440 | 15539720 | CC2D2A | NM_001080522 | 38 | 36 | 17 | 239  | 139  | 6547   | 23,3   | 83,3 |
| chr4 | 15542385 | 15542600 | CC2D2A | NM_001080522 | 38 | 36 | 18 | 178  | 264  | 10969  | 50,78  | 79,2 |
| chr4 | 15552448 | 15552663 | CC2D2A | NM_001080522 | 38 | 36 | 19 | 157  | 284  | 12307  | 56,98  | 99,4 |
| chr4 | 15554829 | 15555014 | CC2D2A | NM_001080522 | 38 | 36 | 20 | 148  | 235  | 10499  | 56,45  | 67,6 |
| chr4 | 15556594 | 15556797 | CC2D2A | NM_001080522 | 38 | 36 | 21 | 139  | 204  | 8434   | 41,34  | 74,1 |
| chr4 | 15558949 | 15559149 | CC2D2A | NM_001080522 | 38 | 36 | 22 | 204  | 257  | 11225  | 55,85  | 89,2 |
| chr4 | 15560760 | 15560975 | CC2D2A | NM_001080522 | 38 | 36 | 23 | 93   | 326  | 15011  | 69,5   | 100  |
| chr4 | 15562039 | 15562248 | CC2D2A | NM_001080522 | 38 | 36 | 24 | 92   | 84   | 3505   | 16,69  | 100  |
| chr4 | 15564901 | 15565089 | CC2D2A | NM_001080522 | 38 | 36 | 25 | 168  | 385  | 15690  | 83,02  | 66,7 |
| chr4 | 15568898 | 15569083 | CC2D2A | NM_001080522 | 38 | 36 | 26 | 106  | 272  | 12304  | 66,15  | 79,2 |
| chr4 | 15569254 | 15569445 | CC2D2A | NM_001080522 | 38 | 36 | 27 | 110  | 330  | 14620  | 76,15  | 100  |
| chr4 | 15570824 | 15571027 | CC2D2A | NM_001080522 | 38 | 36 | 28 | 97   | 458  | 20101  | 98,53  | 100  |
| chr4 | 15571930 | 15572136 | CC2D2A | NM_001080522 | 38 | 36 | 29 | 99   | 251  | 10596  | 51,19  | 100  |
| chr4 | 15575784 | 15576002 | CC2D2A | NM_001080522 | 38 | 36 | 30 | 177  | 328  | 14364  | 65,59  | 93,8 |
| chr4 | 15581667 | 15581840 | CC2D2A | NM_001080522 | 38 | 36 | 31 | 204  | 885  | 37326  | 214,52 | 62,7 |
| chr4 | 15587712 | 15587927 | CC2D2A | NM_001080522 | 38 | 36 | 32 | 90   | 566  | 26252  | 121,54 | 100  |
| chr4 | 15589416 | 15589640 | CC2D2A | NM_001080522 | 38 | 36 | 33 | 114  | 411  | 17738  | 78,84  | 100  |
| chr4 | 15591104 | 15591295 | CC2D2A | NM_001080522 | 38 | 36 | 34 | 135  | 466  | 19956  | 103,94 | 94,8 |
| chr4 | 15597596 | 15597823 | CC2D2A | NM_001080522 | 38 | 36 | 35 | 123  | 891  | 35877  | 157,36 | 94,3 |
| chr4 | 15598982 | 15599182 | CC2D2A | NM_001080522 | 38 | 36 | 36 | 59   | 365  | 14831  | 73,79  | 100  |
| chr4 | 15601158 | 15601379 | CC2D2A | NM_001080522 | 38 | 36 | 37 | 178  | 292  | 12756  | 57,46  | 96,6 |
| chr4 | 15602794 | 15603133 | CC2D2A | NM_001080522 | 38 | 36 | 38 | 189  | 524  | 25189  | 74,09  | 100  |
| chr4 | 15972660 | 15972845 | PROM1  | NM_006017    | 27 | 26 | 26 | 16   | 209  | 8213   | 44,16  | 100  |
| chr4 | 15980894 | 15981082 | PROM1  | NM_006017    | 27 | 26 | 25 | 69   | 544  | 24108  | 127,56 | 94,2 |
| chr4 | 15981481 | 15981690 | PROM1  | NM_006017    | 27 | 26 | 24 | 24   | 278  | 11426  | 54,41  | 100  |
| chr4 | 15981933 | 15982154 | PROM1  | NM_006017    | 27 | 26 | 23 | 116  | 653  | 31021  | 139,73 | 94,8 |
| chr4 | 15985828 | 15986025 | PROM1  | NM_006017    | 27 | 26 | 22 | 93   | 425  | 17590  | 88,84  | 100  |

|      |          |          |        |              |    |    |       |         |      |        |        |             |
|------|----------|----------|--------|--------------|----|----|-------|---------|------|--------|--------|-------------|
| chr4 | 15987441 | 15987709 | PROM1  | NM_006017    | 27 | 26 | 21,20 | 69,81   | 70   | 3031   | 11,27  | 15.9,100.0  |
| chr4 | 15989227 | 15989409 | PROM1  | NM_006017    | 27 | 26 | 19    | 54      | 893  | 39238  | 214,42 | 100         |
| chr4 | 15991285 | 15991461 | PROM1  | NM_006017    | 27 | 26 | 18    | 93      | 340  | 14548  | 82,19  | 100         |
| chr4 | 15992705 | 15992920 | PROM1  | NM_006017    | 27 | 26 | 17    | 72      | 582  | 25510  | 118,1  | 100         |
| chr4 | 15993854 | 15994030 | PROM1  | NM_006017    | 27 | 26 | 16    | 144     | 255  | 10309  | 58,24  | 100         |
| chr4 | 15995548 | 15995736 | PROM1  | NM_006017    | 27 | 26 | 15    | 85      | 684  | 29058  | 153,75 | 100         |
| chr4 | 16000001 | 16000174 | PROM1  | NM_006017    | 27 | 26 | 14    | 104     | 183  | 7587   | 43,6   | 100         |
| chr4 | 16002059 | 16002247 | PROM1  | NM_006017    | 27 | 26 | 13    | 124     | 498  | 21754  | 115,1  | 100         |
| chr4 | 16008154 | 16008372 | PROM1  | NM_006017    | 27 | 26 | 12    | 153     | 181  | 7908   | 36,11  | 100         |
| chr4 | 16010488 | 16010679 | PROM1  | NM_006017    | 27 | 26 | 11    | 160     | 163  | 6929   | 36,09  | 67,5        |
| chr4 | 16014799 | 16014996 | PROM1  | NM_006017    | 27 | 26 | 10    | 64      | 493  | 21270  | 107,42 | 100         |
| chr4 | 16017737 | 16017913 | PROM1  | NM_006017    | 27 | 26 | 9     | 75      | 137  | 5610   | 31,69  | 100         |
| chr4 | 16019984 | 16020178 | PROM1  | NM_006017    | 27 | 26 | 8     | 218     | 340  | 14424  | 73,97  | 82,6        |
| chr4 | 16024860 | 16025063 | PROM1  | NM_006017    | 27 | 26 | 7     | 90      | 643  | 28581  | 140,1  | 100         |
| chr4 | 16025906 | 16026121 | PROM1  | NM_006017    | 27 | 26 | 6     | 64      | 338  | 14955  | 69,24  | 100         |
| chr4 | 16026753 | 16026929 | PROM1  | NM_006017    | 27 | 26 | 5     | 121     | 607  | 24829  | 140,28 | 95          |
| chr4 | 16034866 | 16035054 | PROM1  | NM_006017    | 27 | 26 | 4     | 206     | 610  | 26409  | 139,73 | 62,1        |
| chr4 | 16037267 | 16037473 | PROM1  | NM_006017    | 27 | 26 | 3     | 27      | 340  | 14750  | 71,26  | 100         |
| chr4 | 16040508 | 16040687 | PROM1  | NM_006017    | 27 | 26 | 2     | 56      | 105  | 4271   | 23,73  | 100         |
| chr4 | 16077230 | 16077670 | PROM1  | NM_006017    | 27 | 26 | 1     | 220     | 1096 | 52370  | 118,75 | 100         |
| chr4 | 22389230 | 22390873 | GPR125 | NM_145290    | 19 | 19 | 19,18 | 1243,96 | 4158 | 200448 | 121,93 | 100.0,100.0 |
| chr4 | 22394143 | 22394331 | GPR125 | NM_145290    | 19 | 19 | 17    | 146     | 293  | 12431  | 65,77  | 100         |
| chr4 | 22402994 | 22403191 | GPR125 | NM_145290    | 19 | 19 | 16    | 124     | 320  | 14951  | 75,51  | 100         |
| chr4 | 22404259 | 22404450 | GPR125 | NM_145290    | 19 | 19 | 15    | 125     | 63   | 2737   | 14,26  | 100         |
| chr4 | 22414841 | 22415053 | GPR125 | NM_145290    | 19 | 19 | 14    | 209     | 762  | 31956  | 150,03 | 82,8        |
| chr4 | 22415200 | 22415400 | GPR125 | NM_145290    | 19 | 19 | 13    | 214     | 681  | 29242  | 145,48 | 82,7        |
| chr4 | 22422402 | 22422652 | GPR125 | NM_145290    | 19 | 19 | 12    | 204     | 2283 | 96929  | 386,17 | 70,6        |
| chr4 | 22425854 | 22426066 | GPR125 | NM_145290    | 19 | 19 | 11    | 162     | 1076 | 48810  | 229,15 | 75,3        |
| chr4 | 22436986 | 22437174 | GPR125 | NM_145290    | 19 | 19 | 10    | 156     | 58   | 2198   | 11,63  | 66,7        |
| chr4 | 22438218 | 22438338 | GPR125 | NM_145290    | 19 | 19 | 9     | 202     | 64   | 2558   | 21,14  | 23,3        |
| chr4 | 22439935 | 22440126 | GPR125 | NM_145290    | 19 | 19 | 8     | 165     | 156  | 7289   | 37,96  | 66,1        |
| chr4 | 22444434 | 22444554 | GPR125 | NM_145290    | 19 | 19 | 7     | 214     | 90   | 3237   | 26,75  | 24,8        |
| chr4 | 22446650 | 22446847 | GPR125 | NM_145290    | 19 | 19 | 6     | 161     | 443  | 20757  | 104,83 | 66,5        |
| chr4 | 22449064 | 22449243 | GPR125 | NM_145290    | 19 | 19 | 5     | 72      | 111  | 4456   | 24,76  | 98,6        |
| chr4 | 22456499 | 22456681 | GPR125 | NM_145290    | 19 | 19 | 4     | 72      | 241  | 9788   | 53,49  | 86,1        |
| chr4 | 22463370 | 22463570 | GPR125 | NM_145290    | 19 | 19 | 3     | 72      | 104  | 4501   | 22,39  | 86,1        |
| chr4 | 22475405 | 22475596 | GPR125 | NM_145290    | 19 | 19 | 2     | 72      | 113  | 5200   | 27,08  | 86,1        |
| chr4 | 22517197 | 22517317 | GPR125 | NM_145290    | 19 | 19 | 1     | 257     | 0    | 0      | 0      | 47,1        |
| chr4 | 22517387 | 22517507 | GPR125 | NM_145290    | 19 | 19 | 1     | 257     | 0    | 0      | 0      | 8,2         |
| chr4 | 36285530 | 36286195 | DTHD1  | NM_001170700 | 9  | 9  | 1     | 512     | 614  | 28367  | 42,59  | 96,5        |
| chr4 | 36291961 | 36292318 | DTHD1  | NM_001170700 | 9  | 9  | 2     | 331     | 1588 | 74166  | 207,17 | 97,9        |
| chr4 | 36295143 | 36295343 | DTHD1  | NM_001170700 | 9  | 9  | 3     | 180     | 426  | 18642  | 92,75  | 100         |
| chr4 | 36296395 | 36296675 | DTHD1  | NM_001170700 | 9  | 9  | 4     | 245     | 1082 | 49524  | 176,24 | 100         |
| chr4 | 36307790 | 36308005 | DTHD1  | NM_001170700 | 9  | 9  | 5     | 162     | 269  | 11183  | 51,77  | 100         |
| chr4 | 36309872 | 36310131 | DTHD1  | NM_001170700 | 9  | 9  | 6     | 290     | 375  | 16721  | 64,31  | 84,1        |
| chr4 | 36317788 | 36318050 | DTHD1  | NM_001170700 | 9  | 9  | 7     | 245     | 668  | 30482  | 115,9  | 76,3        |
| chr4 | 36340677 | 36340847 | DTHD1  | NM_001170700 | 9  | 9  | 8     | 58      | 767  | 31434  | 183,82 | 100         |
| chr4 | 36345078 | 36345515 | DTHD1  | NM_001170700 | 9  | 9  | 9     | 323     | 1781 | 82888  | 189,24 | 100         |
| chr4 | 39184078 | 39184263 | WDR19  | NM_025132    | 37 | 36 | 1     | 6       | 257  | 10911  | 58,66  | 100         |
| chr4 | 39187327 | 39187512 | WDR19  | NM_025132    | 37 | 36 | 2     | 92      | 195  | 9373   | 50,39  | 100         |
| chr4 | 39188151 | 39188342 | WDR19  | NM_025132    | 37 | 36 | 3     | 66      | 119  | 5080   | 26,46  | 100         |
| chr4 | 39191247 | 39191423 | WDR19  | NM_025132    | 37 | 36 | 4     | 126     | 508  | 20888  | 118,01 | 100         |
| chr4 | 39196160 | 39196354 | WDR19  | NM_025132    | 37 | 36 | 5     | 116     | 271  | 11617  | 59,57  | 100         |
| chr4 | 39201094 | 39201279 | WDR19  | NM_025132    | 37 | 36 | 6     | 116     | 185  | 8090   | 43,49  | 100         |

|      |           |           |       |              |    |    |       |         |      |        |        |             |
|------|-----------|-----------|-------|--------------|----|----|-------|---------|------|--------|--------|-------------|
| chr4 | 39205216  | 39205398  | WDR19 | NM_025132    | 37 | 36 | 7     | 81      | 562  | 23720  | 129,62 | 100         |
| chr4 | 39206759  | 39206944  | WDR19 | NM_025132    | 37 | 36 | 8     | 113     | 683  | 29429  | 158,22 | 100         |
| chr4 | 39207178  | 39207357  | WDR19 | NM_025132    | 37 | 36 | 9     | 174     | 215  | 9624   | 53,47  | 100         |
| chr4 | 39216200  | 39216388  | WDR19 | NM_025132    | 37 | 36 | 10    | 71      | 154  | 7053   | 37,32  | 100         |
| chr4 | 39217495  | 39217852  | WDR19 | NM_025132    | 37 | 36 | 11,12 | 173.115 | 980  | 42071  | 117,52 | 80.3,100.0  |
| chr4 | 39218745  | 39218924  | WDR19 | NM_025132    | 37 | 36 | 13    | 107     | 415  | 17065  | 94,81  | 100         |
| chr4 | 39219543  | 39219808  | WDR19 | NM_025132    | 37 | 36 | 14    | 123     | 552  | 25691  | 96,58  | 100         |
| chr4 | 39226493  | 39226663  | WDR19 | NM_025132    | 37 | 36 | 15    | 150     | 49   | 2296   | 13,43  | 100         |
| chr4 | 39229740  | 39230254  | WDR19 | NM_025132    | 37 | 36 | 16,17 | 148.205 | 2087 | 92198  | 179,03 | 100.0,72.7  |
| chr4 | 39233384  | 39233596  | WDR19 | NM_025132    | 37 | 36 | 18    | 160     | 312  | 14074  | 66,08  | 100         |
| chr4 | 39233748  | 39233936  | WDR19 | NM_025132    | 37 | 36 | 19    | 111     | 565  | 24644  | 130,39 | 100         |
| chr4 | 39236325  | 39236510  | WDR19 | NM_025132    | 37 | 36 | 20    | 110     | 398  | 17126  | 92,08  | 100         |
| chr4 | 39241891  | 39242097  | WDR19 | NM_025132    | 37 | 36 | 21    | 58      | 263  | 11459  | 55,36  | 100         |
| chr4 | 39245797  | 39246184  | WDR19 | NM_025132    | 37 | 36 | 22,23 | 141,83  | 510  | 24498  | 63,14  | 100.0,100.0 |
| chr4 | 39246885  | 39247109  | WDR19 | NM_025132    | 37 | 36 | 24    | 84      | 168  | 7559   | 33,6   | 100         |
| chr4 | 39254771  | 39254974  | WDR19 | NM_025132    | 37 | 36 | 25    | 147     | 291  | 12827  | 62,88  | 96,6        |
| chr4 | 39255490  | 39255672  | WDR19 | NM_025132    | 37 | 36 | 26    | 125     | 310  | 13341  | 72,9   | 100         |
| chr4 | 39257450  | 39257653  | WDR19 | NM_025132    | 37 | 36 | 27    | 113     | 601  | 24930  | 122,21 | 100         |
| chr4 | 39259018  | 39259209  | WDR19 | NM_025132    | 37 | 36 | 28    | 69      | 116  | 5023   | 26,16  | 100         |
| chr4 | 39267639  | 39267866  | WDR19 | NM_025132    | 37 | 36 | 29    | 78      | 477  | 19576  | 85,86  | 100         |
| chr4 | 39269514  | 39269693  | WDR19 | NM_025132    | 37 | 36 | 30    | 97      | 671  | 28042  | 155,79 | 81,4        |
| chr4 | 39271494  | 39271685  | WDR19 | NM_025132    | 37 | 36 | 31    | 125     | 665  | 28560  | 148,75 | 72          |
| chr4 | 39274480  | 39274668  | WDR19 | NM_025132    | 37 | 36 | 32    | 82      | 309  | 13828  | 73,16  | 84,1        |
| chr4 | 39276479  | 39276661  | WDR19 | NM_025132    | 37 | 36 | 33    | 151     | 248  | 10402  | 56,84  | 66,2        |
| chr4 | 39278595  | 39278798  | WDR19 | NM_025132    | 37 | 36 | 34    | 124     | 658  | 28797  | 141,16 | 100         |
| chr4 | 39279712  | 39279927  | WDR19 | NM_025132    | 37 | 36 | 35    | 77      | 1031 | 42715  | 197,75 | 100         |
| chr4 | 39280060  | 39280245  | WDR19 | NM_025132    | 37 | 36 | 36    | 112     | 752  | 32559  | 175,05 | 77,7        |
| chr4 | 47938333  | 47939896  | CNGA1 | NM_001142564 | 10 | 9  | 10    | 1409    | 4935 | 238225 | 152,32 | 100         |
| chr4 | 47942777  | 47943001  | CNGA1 | NM_001142564 | 10 | 9  | 9     | 107     | 24   | 1110   | 4,93   | 100         |
| chr4 | 47944047  | 47944247  | CNGA1 | NM_001142564 | 10 | 9  | 8     | 108     | 291  | 13602  | 67,67  | 100         |
| chr4 | 47945127  | 47945389  | CNGA1 | NM_001142564 | 10 | 9  | 7,6   | 108,42  | 490  | 19757  | 75,12  | 100.0,4.8   |
| chr4 | 47951825  | 47952013  | CNGA1 | NM_001142564 | 10 | 9  | 5     | 63      | 269  | 10424  | 55,15  | 100         |
| chr4 | 47953282  | 47953500  | CNGA1 | NM_001142564 | 10 | 9  | 4     | 117     | 307  | 13158  | 60,08  | 100         |
| chr4 | 47954519  | 47954778  | CNGA1 | NM_001142564 | 10 | 9  | 3     | 121     | 397  | 18630  | 71,65  | 100         |
| chr4 | 100485048 | 100485476 | MTTP  | NM_000253    | 19 | 18 | 1     | 155     | 626  | 27641  | 64,43  | 100         |
| chr4 | 100495897 | 100496118 | MTTP  | NM_000253    | 19 | 18 | 2     | 61      | 751  | 32888  | 148,14 | 85,2        |
| chr4 | 100503127 | 100503312 | MTTP  | NM_000253    | 19 | 18 | 3     | 188     | 596  | 25149  | 135,21 | 65,4        |
| chr4 | 100504462 | 100504813 | MTTP  | NM_000253    | 19 | 18 | 4     | 144     | 412  | 19362  | 55,01  | 100         |
| chr4 | 100510741 | 100510947 | MTTP  | NM_000253    | 19 | 18 | 5     | 108     | 193  | 7752   | 37,45  | 100         |
| chr4 | 100512349 | 100512543 | MTTP  | NM_000253    | 19 | 18 | 6     | 117     | 404  | 17322  | 88,83  | 100         |
| chr4 | 100512762 | 100512932 | MTTP  | NM_000253    | 19 | 18 | 7     | 140     | 193  | 7584   | 44,35  | 89,3        |
| chr4 | 100515855 | 100516076 | MTTP  | NM_000253    | 19 | 18 | 8     | 151     | 390  | 16942  | 76,32  | 100         |
| chr4 | 100518268 | 100518477 | MTTP  | NM_000253    | 19 | 18 | 9     | 158     | 276  | 11410  | 54,33  | 72,2        |
| chr4 | 100521690 | 100521911 | MTTP  | NM_000253    | 19 | 18 | 10    | 169     | 227  | 9457   | 42,6   | 100         |
| chr4 | 100522747 | 100522944 | MTTP  | NM_000253    | 19 | 18 | 11    | 108     | 779  | 31819  | 160,7  | 100         |
| chr4 | 100527838 | 100528038 | MTTP  | NM_000253    | 19 | 18 | 12    | 213     | 207  | 9157   | 45,56  | 62,9        |
| chr4 | 100529928 | 100530122 | MTTP  | NM_000253    | 19 | 18 | 13    | 212     | 566  | 24595  | 126,13 | 92          |
| chr4 | 100532301 | 100532673 | MTTP  | NM_000253    | 19 | 18 | 14,15 | 98.122  | 2091 | 94239  | 252,65 | 99.0,100.0  |
| chr4 | 100534115 | 100534377 | MTTP  | NM_000253    | 19 | 18 | 16    | 228     | 2028 | 90694  | 344,84 | 80,3        |
| chr4 | 100540104 | 100540277 | MTTP  | NM_000253    | 19 | 18 | 17    | 125     | 158  | 6455   | 37,1   | 100         |
| chr4 | 100542187 | 100542399 | MTTP  | NM_000253    | 19 | 18 | 18    | 171     | 353  | 15048  | 70,65  | 100         |
| chr4 | 100543775 | 100544117 | MTTP  | NM_000253    | 19 | 18 | 19    | 172     | 1945 | 94129  | 274,43 | 100         |
| chr4 | 110772593 | 110773220 | LRIT3 | NM_198506    | 4  | 4  | 2     | 473     | 2322 | 111521 | 177,58 | 100         |
| chr4 | 110788748 | 110789111 | LRIT3 | NM_198506    | 4  | 4  | 3     | 306     | 1632 | 70469  | 193,6  | 100         |

|      |           |           |        |              |    |    |          |             |       |        |        |                   |
|------|-----------|-----------|--------|--------------|----|----|----------|-------------|-------|--------|--------|-------------------|
| chr4 | 110790857 | 110792023 | LRIT3  | NM_198506    | 4  | 4  | 4        | 1145        | 3033  | 145892 | 125,01 | 95,1              |
| chr4 | 122746914 | 122747179 | BBS7   | NM_176824    | 19 | 19 | 19       | 134         | 436   | 19612  | 73,73  | 100               |
| chr4 | 122749177 | 122749940 | BBS7   | NM_176824    | 19 | 19 | 18,17,16 | 124.104.110 | 1478  | 72260  | 94,58  | 100.0,100.0,100.0 |
| chr4 | 122754394 | 122754612 | BBS7   | NM_176824    | 19 | 19 | 15       | 165         | 297   | 12399  | 56,62  | 95,2              |
| chr4 | 122756268 | 122756474 | BBS7   | NM_176824    | 19 | 19 | 14       | 140         | 390   | 17177  | 82,98  | 100               |
| chr4 | 122760727 | 122760915 | BBS7   | NM_176824    | 19 | 19 | 13       | 66          | 293   | 12826  | 67,86  | 100               |
| chr4 | 122764994 | 122765194 | BBS7   | NM_176824    | 19 | 19 | 12       | 75          | 35    | 1559   | 7,76   | 100               |
| chr4 | 122766681 | 122766869 | BBS7   | NM_176824    | 19 | 19 | 11       | 193         | 508   | 20691  | 109,48 | 88,6              |
| chr4 | 122768545 | 122768748 | BBS7   | NM_176824    | 19 | 19 | 10       | 103         | 523   | 24656  | 120,86 | 100               |
| chr4 | 122769955 | 122770131 | BBS7   | NM_176824    | 19 | 19 | 9        | 85          | 504   | 20435  | 115,45 | 100               |
| chr4 | 122774090 | 122774275 | BBS7   | NM_176824    | 19 | 19 | 8        | 131         | 1360  | 57442  | 308,83 | 100               |
| chr4 | 122775822 | 122776004 | BBS7   | NM_176824    | 19 | 19 | 7        | 117         | 699   | 29401  | 160,66 | 100               |
| chr4 | 122776582 | 122776776 | BBS7   | NM_176824    | 19 | 19 | 6        | 73          | 214   | 9177   | 47,06  | 100               |
| chr4 | 122780115 | 122780324 | BBS7   | NM_176824    | 19 | 19 | 5        | 187         | 645   | 28559  | 136    | 95,2              |
| chr4 | 122782624 | 122782892 | BBS7   | NM_176824    | 19 | 19 | 4        | 176         | 385   | 16274  | 60,5   | 100               |
| chr4 | 122784317 | 122784490 | BBS7   | NM_176824    | 19 | 19 | 3        | 63          | 491   | 21065  | 121,06 | 100               |
| chr4 | 122789047 | 122789232 | BBS7   | NM_176824    | 19 | 19 | 2        | 66          | 420   | 16812  | 90,39  | 100               |
| chr4 | 122791353 | 122791606 | BBS7   | NM_176824    | 19 | 19 | 1        | 36          | 207   | 8402   | 33,08  | 100               |
| chr4 | 123663021 | 123665215 | BBS12  | NM_001178007 | 3  | 1  | 3        | 2133        | 5723  | 278135 | 126,71 | 100               |
| chr4 | 155665433 | 155666033 | LRAT   | NM_004744    | 3  | 2  | 2        | 540         | 3471  | 163944 | 272,79 | 100               |
| chr4 | 155670087 | 155670355 | LRAT   | NM_004744    | 3  | 2  | 3        | 153         | 1008  | 46059  | 171,22 | 100               |
| chr4 | 187112905 | 187113567 | CYP4V2 | NM_207352    | 11 | 11 | 1        | 214         | 1839  | 89155  | 134,47 | 100               |
| chr4 | 187115594 | 187115824 | CYP4V2 | NM_207352    | 11 | 11 | 2        | 113         | 198   | 8827   | 38,21  | 100               |
| chr4 | 187117174 | 187117365 | CYP4V2 | NM_207352    | 11 | 11 | 3        | 86          | 542   | 23538  | 122,59 | 80,2              |
| chr4 | 187118148 | 187118360 | CYP4V2 | NM_207352    | 11 | 11 | 4        | 191         | 337   | 13514  | 63,45  | 71,7              |
| chr4 | 187118588 | 187118776 | CYP4V2 | NM_207352    | 11 | 11 | 5        | 70          | 303   | 13112  | 69,38  | 100               |
| chr4 | 187120004 | 187120219 | CYP4V2 | NM_207352    | 11 | 11 | 6        | 127         | 254   | 10630  | 49,21  | 85,8              |
| chr4 | 187122345 | 187122518 | CYP4V2 | NM_207352    | 11 | 11 | 7        | 186         | 362   | 15074  | 86,63  | 81,7              |
| chr4 | 187126322 | 187126537 | CYP4V2 | NM_207352    | 11 | 11 | 8        | 103         | 203   | 8775   | 40,63  | 100               |
| chr4 | 187129942 | 187130370 | CYP4V2 | NM_207352    | 11 | 11 | 9,10     | 135.180     | 1193  | 52689  | 122,82 | 100.0,68.9        |
| chr4 | 187131535 | 187131922 | CYP4V2 | NM_207352    | 11 | 11 | 11       | 173         | 849   | 39297  | 101,28 | 100               |
| chr5 | 82779277  | 82779474  | VCAN   | NM_004385    | 15 | 14 | 2        | 70          | 430   | 18035  | 91,09  | 100               |
| chr5 | 82785863  | 82786208  | VCAN   | NM_004385    | 15 | 14 | 3        | 375         | 679   | 30951  | 89,45  | 77,9              |
| chr5 | 82789340  | 82789780  | VCAN   | NM_004385    | 15 | 14 | 4,5      | 175.128     | 1171  | 54012  | 122,48 | 100.0,100.0       |
| chr5 | 82807874  | 82808335  | VCAN   | NM_004385    | 15 | 14 | 6        | 294         | 303   | 13665  | 29,58  | 100               |
| chr5 | 82815126  | 82818132  | VCAN   | NM_004385    | 15 | 14 | 7        | 2961        | 9388  | 462386 | 153,77 | 100               |
| chr5 | 82832718  | 82838130  | VCAN   | NM_004385    | 15 | 14 | 8        | 5262        | 18477 | 898520 | 165,99 | 100               |
| chr5 | 82841255  | 82841449  | VCAN   | NM_004385    | 15 | 14 | 9        | 114         | 744   | 31909  | 163,64 | 82,5              |
| chr5 | 82843755  | 82843940  | VCAN   | NM_004385    | 15 | 14 | 10       | 114         | 248   | 11372  | 61,14  | 100               |
| chr5 | 82849233  | 82849418  | VCAN   | NM_004385    | 15 | 14 | 11       | 159         | 275   | 11805  | 63,47  | 68,6              |
| chr5 | 82850715  | 82850903  | VCAN   | NM_004385    | 15 | 14 | 12       | 83          | 461   | 19862  | 105,09 | 100               |
| chr5 | 82868191  | 82868412  | VCAN   | NM_004385    | 15 | 14 | 13       | 145         | 192   | 8283   | 37,31  | 100               |
| chr5 | 82875764  | 82876305  | VCAN   | NM_004385    | 15 | 14 | 14,15    | 183.128     | 1929  | 90388  | 166,77 | 100.0,100.0       |
| chr5 | 89910694  | 89910903  | GPR98  | NM_032119    | 90 | 90 | 2        | 185         | 24    | 989    | 4,71   | 77,3              |
| chr5 | 89913595  | 89913792  | GPR98  | NM_032119    | 90 | 90 | 3        | 150         | 434   | 19893  | 100,47 | 100               |
| chr5 | 89914859  | 89915035  | GPR98  | NM_032119    | 90 | 90 | 4        | 96          | 53    | 2447   | 13,82  | 100               |
| chr5 | 89918293  | 89918517  | GPR98  | NM_032119    | 90 | 90 | 5        | 105         | 338   | 14655  | 65,13  | 99                |
| chr5 | 89920891  | 89921097  | GPR98  | NM_032119    | 90 | 90 | 6        | 114         | 455   | 19863  | 95,96  | 100               |
| chr5 | 89922977  | 89923565  | GPR98  | NM_032119    | 90 | 90 | 7        | 566         | 1367  | 64529  | 109,56 | 95,1              |
| chr5 | 89924351  | 89924616  | GPR98  | NM_032119    | 90 | 90 | 8        | 271         | 3855  | 178361 | 670,53 | 87,8              |
| chr5 | 89925014  | 89925368  | GPR98  | NM_032119    | 90 | 90 | 9        | 330         | 799   | 34971  | 98,51  | 100               |
| chr5 | 89930936  | 89931148  | GPR98  | NM_032119    | 90 | 90 | 10       | 177         | 422   | 18332  | 86,07  | 97,2              |
| chr5 | 89933510  | 89933778  | GPR98  | NM_032119    | 90 | 90 | 11       | 224         | 562   | 24373  | 90,61  | 100               |
| chr5 | 89938372  | 89938824  | GPR98  | NM_032119    | 90 | 90 | 12,13    | 127.186     | 880   | 40399  | 89,18  | 100.0,81.7        |

|      |          |          |       |           |    |    |       |         |      |       |        |             |
|------|----------|----------|-------|-----------|----|----|-------|---------|------|-------|--------|-------------|
| chr5 | 89939558 | 89939764 | GPR98 | NM_032119 | 90 | 90 | 14    | 181     | 384  | 17206 | 83,12  | 80,1        |
| chr5 | 89940507 | 89940689 | GPR98 | NM_032119 | 90 | 90 | 15    | 164     | 296  | 12356 | 67,52  | 100         |
| chr5 | 89941749 | 89941940 | GPR98 | NM_032119 | 90 | 90 | 16    | 124     | 152  | 6713  | 34,96  | 100         |
| chr5 | 89943262 | 89943551 | GPR98 | NM_032119 | 90 | 90 | 17    | 267     | 531  | 24253 | 83,63  | 88,8        |
| chr5 | 89947416 | 89947598 | GPR98 | NM_032119 | 90 | 90 | 18    | 127     | 134  | 5753  | 31,44  | 100         |
| chr5 | 89948141 | 89948341 | GPR98 | NM_032119 | 90 | 90 | 19    | 218     | 219  | 9314  | 46,34  | 82,1        |
| chr5 | 89948963 | 89949886 | GPR98 | NM_032119 | 90 | 90 | 20    | 744     | 1680 | 81096 | 87,77  | 100         |
| chr5 | 89953665 | 89954013 | GPR98 | NM_032119 | 90 | 90 | 21    | 374     | 702  | 31019 | 88,88  | 78,1        |
| chr5 | 89968386 | 89968574 | GPR98 | NM_032119 | 90 | 90 | 22    | 177     | 348  | 14311 | 75,72  | 87          |
| chr5 | 89969878 | 89970105 | GPR98 | NM_032119 | 90 | 90 | 23    | 181     | 738  | 31107 | 136,43 | 96,1        |
| chr5 | 89971132 | 89971320 | GPR98 | NM_032119 | 90 | 90 | 24    | 203     | 335  | 13605 | 71,98  | 64,5        |
| chr5 | 89971918 | 89972118 | GPR98 | NM_032119 | 90 | 90 | 25    | 130     | 87   | 3946  | 19,63  | 83,8        |
| chr5 | 89975272 | 89975487 | GPR98 | NM_032119 | 90 | 90 | 26    | 81      | 635  | 28772 | 133,2  | 100         |
| chr5 | 89977086 | 89977307 | GPR98 | NM_032119 | 90 | 90 | 27    | 140     | 438  | 19223 | 86,59  | 100         |
| chr5 | 89979392 | 89980007 | GPR98 | NM_032119 | 90 | 90 | 28    | 610     | 1337 | 62819 | 101,98 | 99,2        |
| chr5 | 89981532 | 89981741 | GPR98 | NM_032119 | 90 | 90 | 29    | 216     | 480  | 20545 | 97,83  | 67,1        |
| chr5 | 89985748 | 89985942 | GPR98 | NM_032119 | 90 | 90 | 30    | 216     | 80   | 3653  | 18,73  | 67,6        |
| chr5 | 89986532 | 89986919 | GPR98 | NM_032119 | 90 | 90 | 31    | 245     | 1810 | 83307 | 214,71 | 100         |
| chr5 | 89988427 | 89988603 | GPR98 | NM_032119 | 90 | 90 | 32    | 182     | 688  | 29309 | 165,59 | 97,3        |
| chr5 | 89989647 | 89990517 | GPR98 | NM_032119 | 90 | 90 | 33    | 812     | 1735 | 82801 | 95,06  | 99,9        |
| chr5 | 89992773 | 89992994 | GPR98 | NM_032119 | 90 | 90 | 34    | 210     | 209  | 9373  | 42,22  | 91          |
| chr5 | 89999515 | 89999703 | GPR98 | NM_032119 | 90 | 90 | 35    | 131     | 345  | 13767 | 72,84  | 74,8        |
| chr5 | 90000140 | 90000316 | GPR98 | NM_032119 | 90 | 90 | 36    | 100     | 470  | 20006 | 113,03 | 100         |
| chr5 | 90001239 | 90001433 | GPR98 | NM_032119 | 90 | 90 | 37    | 180     | 476  | 20915 | 107,26 | 87,8        |
| chr5 | 90002020 | 90002226 | GPR98 | NM_032119 | 90 | 90 | 38    | 164     | 480  | 21545 | 104,08 | 100         |
| chr5 | 90004618 | 90004803 | GPR98 | NM_032119 | 90 | 90 | 39    | 94      | 721  | 29323 | 157,65 | 100         |
| chr5 | 90006770 | 90007112 | GPR98 | NM_032119 | 90 | 90 | 40,41 | 79.139  | 236  | 10835 | 31,59  | 100,0,80.6  |
| chr5 | 90008113 | 90008310 | GPR98 | NM_032119 | 90 | 90 | 42    | 142     | 87   | 3255  | 16,44  | 93,7        |
| chr5 | 90012259 | 90012521 | GPR98 | NM_032119 | 90 | 90 | 43    | 263     | 621  | 27157 | 103,26 | 90,5        |
| chr5 | 90015846 | 90016067 | GPR98 | NM_032119 | 90 | 90 | 44    | 176     | 324  | 13039 | 58,73  | 100         |
| chr5 | 90016713 | 90016901 | GPR98 | NM_032119 | 90 | 90 | 45    | 125     | 998  | 43860 | 232,06 | 100         |
| chr5 | 90020607 | 90021050 | GPR98 | NM_032119 | 90 | 90 | 46,47 | 158.147 | 243  | 10948 | 24,66  | 100,0,100.0 |
| chr5 | 90021268 | 90021462 | GPR98 | NM_032119 | 90 | 90 | 48    | 108     | 494  | 22806 | 116,95 | 89,8        |
| chr5 | 90024432 | 90024742 | GPR98 | NM_032119 | 90 | 90 | 49    | 265     | 530  | 24230 | 77,91  | 97          |
| chr5 | 90025449 | 90025649 | GPR98 | NM_032119 | 90 | 90 | 50    | 123     | 642  | 27120 | 134,93 | 100         |
| chr5 | 90040814 | 90041067 | GPR98 | NM_032119 | 90 | 90 | 51    | 220     | 1323 | 59997 | 236,21 | 93,2        |
| chr5 | 90041424 | 90041636 | GPR98 | NM_032119 | 90 | 90 | 52    | 205     | 317  | 14242 | 66,86  | 92,2        |
| chr5 | 90046313 | 90046504 | GPR98 | NM_032119 | 90 | 90 | 53    | 147     | 500  | 21914 | 114,14 | 93,2        |
| chr5 | 90049387 | 90049673 | GPR98 | NM_032119 | 90 | 90 | 54    | 256     | 473  | 21613 | 75,31  | 100         |
| chr5 | 90050740 | 90050928 | GPR98 | NM_032119 | 90 | 90 | 55    | 203     | 395  | 17143 | 90,7   | 63,5        |
| chr5 | 90052327 | 90052530 | GPR98 | NM_032119 | 90 | 90 | 56    | 177     | 252  | 10813 | 53     | 68,4        |
| chr5 | 90052741 | 90052965 | GPR98 | NM_032119 | 90 | 90 | 57    | 183     | 211  | 9146  | 40,65  | 92,9        |
| chr5 | 90055167 | 90055497 | GPR98 | NM_032119 | 90 | 90 | 58    | 180     | 994  | 45654 | 137,93 | 100         |
| chr5 | 90059088 | 90059318 | GPR98 | NM_032119 | 90 | 90 | 59    | 165     | 321  | 14644 | 63,39  | 100         |
| chr5 | 90069925 | 90070134 | GPR98 | NM_032119 | 90 | 90 | 60    | 118     | 234  | 10518 | 50,09  | 100         |
| chr5 | 90072225 | 90072446 | GPR98 | NM_032119 | 90 | 90 | 61    | 124     | 249  | 10649 | 47,97  | 100         |
| chr5 | 90073651 | 90073872 | GPR98 | NM_032119 | 90 | 90 | 62    | 139     | 134  | 5959  | 26,84  | 100         |
| chr5 | 90074180 | 90074365 | GPR98 | NM_032119 | 90 | 90 | 63    | 183     | 376  | 16402 | 88,18  | 66,7        |
| chr5 | 90074642 | 90074943 | GPR98 | NM_032119 | 90 | 90 | 64    | 233     | 230  | 9885  | 32,73  | 100         |
| chr5 | 90077091 | 90077469 | GPR98 | NM_032119 | 90 | 90 | 65    | 149     | 685  | 29958 | 79,04  | 100         |
| chr5 | 90078911 | 90079120 | GPR98 | NM_032119 | 90 | 90 | 66    | 202     | 126  | 5491  | 26,15  | 89,1        |
| chr5 | 90079693 | 90079958 | GPR98 | NM_032119 | 90 | 90 | 67    | 220     | 641  | 29300 | 110,15 | 82,7        |
| chr5 | 90083831 | 90084108 | GPR98 | NM_032119 | 90 | 90 | 68    | 240     | 526  | 23708 | 85,28  | 92,1        |
| chr5 | 90085493 | 90085693 | GPR98 | NM_032119 | 90 | 90 | 69    | 150     | 48   | 2108  | 10,49  | 100         |



|      |           |           |       |           |    |    |      |         |      |        |        |             |
|------|-----------|-----------|-------|-----------|----|----|------|---------|------|--------|--------|-------------|
| chr5 | 90086720  | 90087246  | GPR98 | NM_032119 | 90 | 90 | 70   | 474     | 1127 | 52921  | 100,42 | 93,7        |
| chr5 | 90098455  | 90098658  | GPR98 | NM_032119 | 90 | 90 | 71   | 144     | 817  | 36601  | 179,42 | 71,5        |
| chr5 | 90101054  | 90101254  | GPR98 | NM_032119 | 90 | 90 | 72   | 175     | 401  | 17375  | 86,44  | 88          |
| chr5 | 90103335  | 90103514  | GPR98 | NM_032119 | 90 | 90 | 73   | 136     | 68   | 2885   | 16,03  | 70,6        |
| chr5 | 90106064  | 90107197  | GPR98 | NM_032119 | 90 | 90 | 74   | 1106    | 4832 | 235509 | 207,68 | 98,7        |
| chr5 | 90111385  | 90111600  | GPR98 | NM_032119 | 90 | 90 | 75   | 118     | 210  | 8741   | 40,47  | 100         |
| chr5 | 90119269  | 90119451  | GPR98 | NM_032119 | 90 | 90 | 76   | 172     | 486  | 20159  | 110,16 | 84,3        |
| chr5 | 90124786  | 90125048  | GPR98 | NM_032119 | 90 | 90 | 77   | 243     | 380  | 16071  | 61,11  | 89,7        |
| chr5 | 90136378  | 90136809  | GPR98 | NM_032119 | 90 | 90 | 78   | 408     | 775  | 34347  | 79,51  | 100         |
| chr5 | 90144445  | 90144660  | GPR98 | NM_032119 | 90 | 90 | 79   | 185     | 255  | 10966  | 50,77  | 100         |
| chr5 | 90149091  | 90149353  | GPR98 | NM_032119 | 90 | 90 | 80   | 250     | 502  | 22620  | 86,01  | 100         |
| chr5 | 90149872  | 90150075  | GPR98 | NM_032119 | 90 | 90 | 81   | 140     | 209  | 9314   | 45,66  | 100         |
| chr5 | 90151498  | 90151713  | GPR98 | NM_032119 | 90 | 90 | 82   | 161     | 516  | 21807  | 100,96 | 96,9        |
| chr5 | 90159538  | 90159768  | GPR98 | NM_032119 | 90 | 90 | 83   | 101     | 336  | 15651  | 67,75  | 100         |
| chr5 | 90261177  | 90261395  | GPR98 | NM_032119 | 90 | 90 | 84   | 117     | 243  | 10448  | 47,71  | 100         |
| chr5 | 90281119  | 90281331  | GPR98 | NM_032119 | 90 | 90 | 85   | 179     | 541  | 22834  | 107,2  | 95,5        |
| chr5 | 90368230  | 90368454  | GPR98 | NM_032119 | 90 | 90 | 86   | 158     | 140  | 6430   | 28,58  | 100         |
| chr5 | 90398026  | 90398217  | GPR98 | NM_032119 | 90 | 90 | 87   | 122     | 413  | 19105  | 99,51  | 100         |
| chr5 | 90445833  | 90446030  | GPR98 | NM_032119 | 90 | 90 | 88   | 192     | 561  | 24374  | 123,1  | 95,8        |
| chr5 | 90449092  | 90449271  | GPR98 | NM_032119 | 90 | 90 | 89   | 178     | 299  | 12618  | 70,1   | 69,7        |
| chr5 | 90459529  | 90459824  | GPR98 | NM_032119 | 90 | 90 | 90   | 119     | 1349 | 59457  | 200,87 | 100         |
| chr5 | 140053734 | 140053943 | HARS  | NM_002109 | 13 | 13 | 13   | 72      | 432  | 18297  | 87,13  | 100         |
| chr5 | 140054278 | 140054466 | HARS  | NM_002109 | 13 | 13 | 12   | 147     | 1648 | 71777  | 379,77 | 90,5        |
| chr5 | 140054487 | 140054708 | HARS  | NM_002109 | 13 | 13 | 11   | 117     | 711  | 28733  | 129,43 | 91,5        |
| chr5 | 140056227 | 140056765 | HARS  | NM_002109 | 13 | 13 | 10,9 | 243.128 | 1849 | 83297  | 154,54 | 100.0,100.0 |
| chr5 | 140056798 | 140057010 | HARS  | NM_002109 | 13 | 13 | 8    | 94      | 1131 | 48909  | 229,62 | 100         |
| chr5 | 140057203 | 140057581 | HARS  | NM_002109 | 13 | 13 | 7,6  | 99.108  | 1499 | 72905  | 192,36 | 100.0,82.4  |
| chr5 | 140058618 | 140058797 | HARS  | NM_002109 | 13 | 13 | 5    | 126     | 250  | 10430  | 57,94  | 75,4        |
| chr5 | 140059278 | 140059505 | HARS  | NM_002109 | 13 | 13 | 4    | 96      | 497  | 22271  | 97,68  | 100         |
| chr5 | 140062593 | 140062772 | HARS  | NM_002109 | 13 | 13 | 3    | 120     | 1106 | 49772  | 276,51 | 73,3        |
| chr5 | 140070333 | 140070512 | HARS  | NM_002109 | 13 | 13 | 2    | 90      | 794  | 32315  | 179,53 | 81,1        |
| chr5 | 140070840 | 140071058 | HARS  | NM_002109 | 13 | 13 | 1    | 90      | 190  | 7420   | 33,88  | 55,6        |
| chr5 | 149240312 | 149240512 | PDE6A | NM_000440 | 22 | 22 | 22   | 77      | 437  | 18571  | 92,39  | 71,4        |
| chr5 | 149242664 | 149242846 | PDE6A | NM_000440 | 22 | 22 | 21   | 148     | 1973 | 81455  | 445,11 | 100         |
| chr5 | 149245746 | 149245931 | PDE6A | NM_000440 | 22 | 22 | 20   | 84      | 272  | 11307  | 60,79  | 84,5        |
| chr5 | 149247152 | 149247370 | PDE6A | NM_000440 | 22 | 22 | 19   | 75      | 836  | 36570  | 166,99 | 100         |
| chr5 | 149247664 | 149247849 | PDE6A | NM_000440 | 22 | 22 | 18   | 64      | 1489 | 58807  | 316,17 | 90,6        |
| chr5 | 149263020 | 149263199 | PDE6A | NM_000440 | 22 | 22 | 17   | 108     | 427  | 17447  | 96,93  | 74,1        |
| chr5 | 149263994 | 149264191 | PDE6A | NM_000440 | 22 | 22 | 16   | 101     | 156  | 7043   | 35,57  | 100         |
| chr5 | 149264358 | 149264546 | PDE6A | NM_000440 | 22 | 22 | 15   | 88      | 419  | 17420  | 92,17  | 83          |
| chr5 | 149265857 | 149266042 | PDE6A | NM_000440 | 22 | 22 | 14   | 110     | 477  | 21509  | 115,64 | 73,6        |
| chr5 | 149274756 | 149274974 | PDE6A | NM_000440 | 22 | 22 | 13   | 108     | 361  | 16056  | 73,32  | 90,7        |
| chr5 | 149275900 | 149276091 | PDE6A | NM_000440 | 22 | 22 | 12   | 147     | 527  | 22972  | 119,65 | 100         |
| chr5 | 149276266 | 149276472 | PDE6A | NM_000440 | 22 | 22 | 11   | 66      | 668  | 25691  | 124,11 | 100         |
| chr5 | 149277972 | 149278157 | PDE6A | NM_000440 | 22 | 22 | 10   | 144     | 121  | 5236   | 28,15  | 68,1        |
| chr5 | 149278942 | 149279130 | PDE6A | NM_000440 | 22 | 22 | 9    | 150     | 1421 | 62846  | 332,52 | 97,3        |
| chr5 | 149283119 | 149283298 | PDE6A | NM_000440 | 22 | 22 | 8    | 48      | 209  | 8414   | 46,74  | 100         |
| chr5 | 149286747 | 149286932 | PDE6A | NM_000440 | 22 | 22 | 7    | 67      | 834  | 37986  | 204,23 | 86,6        |
| chr5 | 149294422 | 149294592 | PDE6A | NM_000440 | 22 | 22 | 6    | 65      | 68   | 3063   | 17,91  | 100         |
| chr5 | 149301119 | 149301331 | PDE6A | NM_000440 | 22 | 22 | 5    | 75      | 108  | 4949   | 23,23  | 100         |
| chr5 | 149310548 | 149310775 | PDE6A | NM_000440 | 22 | 22 | 4    | 141     | 484  | 20710  | 90,83  | 100         |
| chr5 | 149313506 | 149313700 | PDE6A | NM_000440 | 22 | 22 | 3    | 90      | 171  | 7130   | 36,56  | 85,6        |
| chr5 | 149314092 | 149314301 | PDE6A | NM_000440 | 22 | 22 | 2    | 153     | 500  | 21700  | 103,33 | 100         |
| chr5 | 149323830 | 149324353 | PDE6A | NM_000440 | 22 | 22 | 1    | 474     | 1662 | 75349  | 143,8  | 85,9        |

|      |           |           |         |           |    |    |                   |                   |      |        |        |                                    |
|------|-----------|-----------|---------|-----------|----|----|-------------------|-------------------|------|--------|--------|------------------------------------|
| chr5 | 178408668 | 178408859 | GRM6    | NM_000843 | 10 | 10 | 10                | 198               | 640  | 27723  | 144,39 | 94,9                               |
| chr5 | 178409966 | 178410833 | GRM6    | NM_000843 | 10 | 10 | 9                 | 312               | 1905 | 89573  | 103,19 | 82,4                               |
| chr5 | 178413212 | 178414034 | GRM6    | NM_000843 | 10 | 10 | 8,7               | 624.146           | 1384 | 65873  | 80,04  | 87.0,100.0                         |
| chr5 | 178415964 | 178416487 | GRM6    | NM_000843 | 10 | 10 | 6,5               | 201.141           | 566  | 26151  | 49,91  | 86.1,100.0                         |
| chr5 | 178417507 | 178417707 | GRM6    | NM_000843 | 10 | 10 | 4                 | 155               | 80   | 3506   | 17,44  | 74,2                               |
| chr5 | 178418379 | 178419382 | GRM6    | NM_000843 | 10 | 10 | 3,2               | 136.217           | 2528 | 120307 | 119,83 | 100.0,100.0                        |
| chr5 | 178421365 | 178421915 | GRM6    | NM_000843 | 10 | 10 | 1                 | 504               | 9    | 404    | 0,73   | 94                                 |
| chr6 | 10764566  | 10764793  | MAK     | NM_005906 | 14 | 13 | 14                | 155               | 296  | 13094  | 57,43  | 70,3                               |
| chr6 | 10770260  | 10770472  | MAK     | NM_005906 | 14 | 13 | 13                | 120               | 475  | 19938  | 93,61  | 100                                |
| chr6 | 10775475  | 10775654  | MAK     | NM_005906 | 14 | 13 | 12                | 132               | 410  | 17366  | 96,48  | 71,2                               |
| chr6 | 10784564  | 10784767  | MAK     | NM_005906 | 14 | 13 | 11                | 149               | 845  | 37623  | 184,43 | 74,5                               |
| chr6 | 10791911  | 10792126  | MAK     | NM_005906 | 14 | 13 | 10                | 173               | 148  | 6328   | 29,3   | 98,3                               |
| chr6 | 10796275  | 10796629  | MAK     | NM_005906 | 14 | 13 | 9                 | 312               | 447  | 20889  | 58,84  | 85,9                               |
| chr6 | 10802075  | 10802275  | MAK     | NM_005906 | 14 | 13 | 8                 | 168               | 495  | 20999  | 104,47 | 89,9                               |
| chr6 | 10803935  | 10804135  | MAK     | NM_005906 | 14 | 13 | 7                 | 172               | 385  | 16894  | 84,05  | 100                                |
| chr6 | 10808945  | 10809160  | MAK     | NM_005906 | 14 | 13 | 6                 | 133               | 355  | 15189  | 70,32  | 88,7                               |
| chr6 | 10813885  | 10814091  | MAK     | NM_005906 | 14 | 13 | 5                 | 80                | 668  | 28429  | 137,34 | 90                                 |
| chr6 | 10817986  | 10818168  | MAK     | NM_005906 | 14 | 13 | 4                 | 122               | 105  | 3801   | 20,77  | 70,5                               |
| chr6 | 10819030  | 10819242  | MAK     | NM_005906 | 14 | 13 | 3                 | 55                | 324  | 14547  | 68,3   | 100                                |
| chr6 | 10830824  | 10831015  | MAK     | NM_005906 | 14 | 13 | 2                 | 101               | 617  | 26248  | 136,71 | 57,4                               |
| chr6 | 33131353  | 33131547  | COL11A2 | NM_080680 | 66 | 66 | 66                | 141               | 70   | 2811   | 14,42  | 66                                 |
| chr6 | 33131986  | 33132171  | COL11A2 | NM_080680 | 66 | 66 | 65                | 207               | 540  | 23844  | 128,19 | 61,8                               |
| chr6 | 33132638  | 33132853  | COL11A2 | NM_080680 | 66 | 66 | 64                | 113               | 752  | 31678  | 146,66 | 92                                 |
| chr6 | 33133392  | 33134005  | COL11A2 | NM_080680 | 66 | 66 | 63,62,61          | 268,54,36         | 1169 | 54019  | 87,98  | 75.4,100.0,100.0                   |
| chr6 | 33134191  | 33134566  | COL11A2 | NM_080680 | 66 | 66 | 60,59             | 54.108            | 2776 | 127971 | 340,35 | 100.0,64.8                         |
| chr6 | 33134749  | 33135281  | COL11A2 | NM_080680 | 66 | 66 | 58,57,56          | 54,54,108         | 595  | 26476  | 49,67  | 100.0,100.0,73.1                   |
| chr6 | 33135541  | 33135744  | COL11A2 | NM_080680 | 66 | 66 | 55                | 54                | 143  | 5809   | 28,48  | 100                                |
| chr6 | 33136272  | 33136549  | COL11A2 | NM_080680 | 66 | 66 | 54,53             | 54,54             | 202  | 9098   | 32,73  | 100.0,100.0                        |
| chr6 | 33136697  | 33136882  | COL11A2 | NM_080680 | 66 | 66 | 52                | 54                | 134  | 5403   | 29,05  | 100                                |
| chr6 | 33137062  | 33137247  | COL11A2 | NM_080680 | 66 | 66 | 51                | 108               | 386  | 16022  | 86,14  | 81,5                               |
| chr6 | 33137662  | 33137957  | COL11A2 | NM_080680 | 66 | 66 | 49                | 54                | 1119 | 52787  | 178,33 | 100                                |
| chr6 | 33138029  | 33138309  | COL11A2 | NM_080680 | 66 | 66 | 48                | 54                | 165  | 6950   | 24,73  | 100                                |
| chr6 | 33138609  | 33138800  | COL11A2 | NM_080680 | 66 | 66 | 46                | 108               | 93   | 4084   | 21,27  | 79,6                               |
| chr6 | 33138908  | 33139668  | COL11A2 | NM_080680 | 66 | 66 | 45,44,43,42       | 54,54,108,108     | 1354 | 64176  | 84,33  | 68.5,100.0,100.0,100.0             |
| chr6 | 33139795  | 33139983  | COL11A2 | NM_080680 | 66 | 66 | 41                | 54                | 362  | 16319  | 86,34  | 100                                |
| chr6 | 33140095  | 33140437  | COL11A2 | NM_080680 | 66 | 66 | 40,39             | 90.108            | 664  | 29549  | 86,15  | 67.8,100.0                         |
| chr6 | 33140802  | 33140993  | COL11A2 | NM_080680 | 66 | 66 | 38                | 54                | 120  | 5079   | 26,45  | 100                                |
| chr6 | 33141126  | 33142052  | COL11A2 | NM_080680 | 66 | 66 | 37,36,35,34,33,32 | 54,54,45,54,45,54 | 1800 | 86082  | 92,86  | 98.1,100.0,100.0,100.0,100.0,100.0 |
| chr6 | 33142158  | 33142355  | COL11A2 | NM_080680 | 66 | 66 | 31                | 54                | 89   | 3664   | 18,51  | 96,3                               |
| chr6 | 33143184  | 33143408  | COL11A2 | NM_080680 | 66 | 66 | 30                | 108               | 487  | 22291  | 99,07  | 53,7                               |
| chr6 | 33143794  | 33144214  | COL11A2 | NM_080680 | 66 | 66 | 29,28,27          | 54,45,54          | 1059 | 49012  | 116,42 | 98.1,100.0,9.3                     |
| chr6 | 33144389  | 33144595  | COL11A2 | NM_080680 | 66 | 66 | 26                | 45                | 337  | 14100  | 68,12  | 100                                |
| chr6 | 33144790  | 33145249  | COL11A2 | NM_080680 | 66 | 66 | 25,24,23          | 54,45,54          | 1568 | 72523  | 157,66 | 61.1,100.0,100.0                   |
| chr6 | 33145834  | 33146221  | COL11A2 | NM_080680 | 66 | 66 | 21,20,19          | 54,45,54          | 1097 | 43588  | 112,34 | 100.0,100.0,18.5                   |
| chr6 | 33146334  | 33146528  | COL11A2 | NM_080680 | 66 | 66 | 18                | 54                | 1710 | 76219  | 390,87 | 100                                |
| chr6 | 33146656  | 33147238  | COL11A2 | NM_080680 | 66 | 66 | 17,16,15,14       | 54,54,54,57       | 1020 | 41962  | 71,98  | 100.0,100.0,100.0,54.4             |
| chr6 | 33147504  | 33147698  | COL11A2 | NM_080680 | 66 | 66 | 13                | 87                | 87   | 3008   | 15,43  | 90,8                               |
| chr6 | 33147911  | 33148096  | COL11A2 | NM_080680 | 66 | 66 | 12                | 75                | 888  | 38518  | 207,09 | 82,7                               |
| chr6 | 33148438  | 33148623  | COL11A2 | NM_080680 | 66 | 66 | 11                | 63                | 203  | 8091   | 43,5   | 100                                |
| chr6 | 33148797  | 33148997  | COL11A2 | NM_080680 | 66 | 66 | 9                 | 60                | 888  | 38601  | 192,04 | 100                                |
| chr6 | 33151842  | 33152054  | COL11A2 | NM_080680 | 66 | 66 | 8                 | 180               | 644  | 27853  | 130,77 | 73,9                               |
| chr6 | 33152738  | 33152917  | COL11A2 | NM_080680 | 66 | 66 | 7                 | 63                | 46   | 1909   | 10,61  | 100                                |
| chr6 | 33153401  | 33153586  | COL11A2 | NM_080680 | 66 | 66 | 6                 | 78                | 60   | 2774   | 14,91  | 100                                |
| chr6 | 33154237  | 33154541  | COL11A2 | NM_080680 | 66 | 66 | 5                 | 192               | 349  | 15800  | 51,8   | 71,9                               |

|      |          |          |         |              |    |    |       |         |      |        |        |             |
|------|----------|----------|---------|--------------|----|----|-------|---------|------|--------|--------|-------------|
| chr6 | 33156044 | 33156244 | COL11A2 | NM_080680    | 66 | 66 | 4     | 163     | 261  | 11573  | 57,58  | 65          |
| chr6 | 33156725 | 33157218 | COL11A2 | NM_080680    | 66 | 66 | 3,2   | 211.150 | 729  | 34228  | 69,29  | 100.0,81.3  |
| chr6 | 33159879 | 33160189 | COL11A2 | NM_080680    | 66 | 66 | 1     | 82      | 19   | 726    | 2,33   | 100         |
| chr6 | 35466018 | 35466298 | TULP1   | NM_003322    | 15 | 15 | 15    | 134     | 48   | 2027   | 7,21   | 100         |
| chr6 | 35467758 | 35467931 | TULP1   | NM_003322    | 15 | 15 | 14    | 172     | 417  | 16459  | 94,59  | 100         |
| chr6 | 35471406 | 35471671 | TULP1   | NM_003322    | 15 | 15 | 13,12 | 99.112  | 645  | 29844  | 112,2  | 29.3,100.0  |
| chr6 | 35473420 | 35474026 | TULP1   | NM_003322    | 15 | 15 | 11,10 | 113.171 | 886  | 41717  | 68,73  | 100.0,100.0 |
| chr6 | 35476982 | 35477212 | TULP1   | NM_003322    | 15 | 15 | 8     | 104     | 605  | 25482  | 110,31 | 100         |
| chr6 | 35477450 | 35477721 | TULP1   | NM_003322    | 15 | 15 | 7,6   | 117.102 | 1135 | 52617  | 193,44 | 66.7,100.0  |
| chr6 | 35478558 | 35478743 | TULP1   | NM_003322    | 15 | 15 | 5     | 150     | 885  | 42409  | 228,01 | 70,7        |
| chr6 | 35479343 | 35479528 | TULP1   | NM_003322    | 15 | 15 | 4     | 159     | 176  | 7637   | 41,06  | 65,4        |
| chr6 | 35479964 | 35480164 | TULP1   | NM_003322    | 15 | 15 | 3     | 91      | 23   | 934    | 4,65   | 92,3        |
| chr6 | 35480381 | 35480735 | TULP1   | NM_003322    | 15 | 15 | 2,1   | 52,47   | 1082 | 45352  | 127,75 | 100.0,100.0 |
| chr6 | 42123174 | 42123368 | GUCA1A  | NM_000409    | 6  | 4  | 1     | 188     | 335  | 12920  | 66,26  | 84          |
| chr6 | 42130721 | 42131066 | GUCA1A  | NM_000409    | 6  | 4  | 2     | 176     | 2947 | 141907 | 410,14 | 64,2        |
| chr6 | 42141303 | 42141491 | GUCA1A  | NM_000409    | 6  | 4  | 3     | 201     | 193  | 7775   | 41,14  | 69,7        |
| chr6 | 42146018 | 42146683 | GUCA1A  | NM_000409    | 6  | 4  | 4,5   | 150,94  | 2038 | 97805  | 146,85 | 100.0,100.0 |
| chr6 | 42147014 | 42147241 | GUCA1A  | NM_000409    | 6  | 4  | 6     | 161     | 27   | 1228   | 5,39   | 79,5        |
| chr6 | 42152315 | 42152725 | GUCA1B  | NM_002098    | 4  | 4  | 4     | 128     | 1610 | 73374  | 178,53 | 100         |
| chr6 | 42153412 | 42153606 | GUCA1B  | NM_002098    | 4  | 4  | 3     | 118     | 623  | 26687  | 136,86 | 100         |
| chr6 | 42156309 | 42156488 | GUCA1B  | NM_002098    | 4  | 4  | 2     | 150     | 1236 | 53453  | 296,96 | 100         |
| chr6 | 42162327 | 42162586 | GUCA1B  | NM_002098    | 4  | 4  | 1     | 207     | 1136 | 52880  | 203,38 | 100         |
| chr6 | 42666028 | 42666216 | PRPH2   | NM_000322    | 3  | 3  | 3     | 213     | 687  | 29960  | 158,52 | 86,4        |
| chr6 | 42672145 | 42672440 | PRPH2   | NM_000322    | 3  | 3  | 2     | 247     | 932  | 40821  | 137,91 | 83          |
| chr6 | 42689432 | 42690168 | PRPH2   | NM_000322    | 3  | 3  | 1     | 581     | 3793 | 182182 | 247,19 | 100         |
| chr6 | 64430400 | 64431726 | EYS     | NM_001142800 | 43 | 40 | 43    | 1202    | 4944 | 239450 | 180,44 | 100         |
| chr6 | 64436380 | 64436580 | EYS     | NM_001142800 | 43 | 40 | 42    | 162     | 481  | 19872  | 98,87  | 100         |
| chr6 | 64472309 | 64472509 | EYS     | NM_001142800 | 43 | 40 | 41    | 173     | 405  | 17508  | 87,1   | 90,2        |
| chr6 | 64487811 | 64488112 | EYS     | NM_001142800 | 43 | 40 | 40    | 175     | 443  | 18793  | 62,23  | 100         |
| chr6 | 64497984 | 64498157 | EYS     | NM_001142800 | 43 | 40 | 39    | 145     | 238  | 9771   | 56,16  | 100         |
| chr6 | 64498867 | 64499082 | EYS     | NM_001142800 | 43 | 40 | 38    | 167     | 330  | 14869  | 68,84  | 79          |
| chr6 | 64516100 | 64516303 | EYS     | NM_001142800 | 43 | 40 | 37    | 183     | 235  | 10357  | 50,77  | 90,7        |
| chr6 | 64574058 | 64574273 | EYS     | NM_001142800 | 43 | 40 | 36    | 173     | 520  | 22536  | 104,33 | 100         |
| chr6 | 64694200 | 64694483 | EYS     | NM_001142800 | 43 | 40 | 35    | 221     | 572  | 26251  | 92,43  | 94,1        |
| chr6 | 64708994 | 64709176 | EYS     | NM_001142800 | 43 | 40 | 34    | 109     | 239  | 10407  | 56,87  | 76,1        |
| chr6 | 64776159 | 64776344 | EYS     | NM_001142800 | 43 | 40 | 33    | 154     | 348  | 14218  | 76,44  | 74          |
| chr6 | 64791727 | 64791906 | EYS     | NM_001142800 | 43 | 40 | 32    | 147     | 83   | 3244   | 18,02  | 100         |
| chr6 | 64940445 | 64940752 | EYS     | NM_001142800 | 43 | 40 | 31    | 233     | 213  | 9661   | 31,37  | 100         |
| chr6 | 65016887 | 65017081 | EYS     | NM_001142800 | 43 | 40 | 30    | 113     | 85   | 3523   | 18,07  | 78,8        |
| chr6 | 65098569 | 65098757 | EYS     | NM_001142800 | 43 | 40 | 29    | 151     | 331  | 14753  | 78,06  | 100         |
| chr6 | 65145988 | 65146185 | EYS     | NM_001142800 | 43 | 40 | 28    | 92      | 424  | 17280  | 87,27  | 100         |
| chr6 | 65149091 | 65149264 | EYS     | NM_001142800 | 43 | 40 | 27    | 191     | 47   | 2079   | 11,95  | 81,2        |
| chr6 | 65300041 | 65301823 | EYS     | NM_001142800 | 43 | 40 | 26    | 1767    | 4576 | 219689 | 123,21 | 96,7        |
| chr6 | 65302975 | 65303172 | EYS     | NM_001142800 | 43 | 40 | 25    | 193     | 470  | 21302  | 107,59 | 84,5        |
| chr6 | 65327265 | 65327468 | EYS     | NM_001142800 | 43 | 40 | 24    | 116     | 889  | 38377  | 188,12 | 100         |
| chr6 | 65336026 | 65336244 | EYS     | NM_001142800 | 43 | 40 | 23    | 125     | 428  | 18294  | 83,53  | 90,4        |
| chr6 | 65523240 | 65523434 | EYS     | NM_001142800 | 43 | 40 | 22    | 200     | 511  | 21728  | 111,43 | 82          |
| chr6 | 65531545 | 65531730 | EYS     | NM_001142800 | 43 | 40 | 21    | 79      | 58   | 2504   | 13,46  | 91,1        |
| chr6 | 65532544 | 65532759 | EYS     | NM_001142800 | 43 | 40 | 20    | 172     | 497  | 21961  | 101,67 | 100         |
| chr6 | 65596502 | 65596702 | EYS     | NM_001142800 | 43 | 40 | 19    | 146     | 444  | 19115  | 95,1   | 77,4        |
| chr6 | 65611902 | 65612114 | EYS     | NM_001142800 | 43 | 40 | 18    | 108     | 141  | 5610   | 26,34  | 100         |
| chr6 | 65612247 | 65612435 | EYS     | NM_001142800 | 43 | 40 | 17    | 97      | 821  | 34065  | 180,24 | 100         |
| chr6 | 65622366 | 65622646 | EYS     | NM_001142800 | 43 | 40 | 16    | 260     | 703  | 30527  | 108,64 | 100         |
| chr6 | 65655613 | 65655816 | EYS     | NM_001142800 | 43 | 40 | 15    | 122     | 357  | 15318  | 75,09  | 100         |

|      |          |          |        |              |    |    |          |          |      |        |        |                  |
|------|----------|----------|--------|--------------|----|----|----------|----------|------|--------|--------|------------------|
| chr6 | 65707426 | 65707638 | EYS    | NM_001142800 | 43 | 40 | 14       | 122      | 344  | 14249  | 66,9   | 100              |
| chr6 | 65767445 | 65767642 | EYS    | NM_001142800 | 43 | 40 | 13       | 114      | 227  | 9101   | 45,96  | 100              |
| chr6 | 66005779 | 66006044 | EYS    | NM_001142800 | 43 | 40 | 12       | 257      | 564  | 24498  | 92,1   | 91,1             |
| chr6 | 66044847 | 66045136 | EYS    | NM_001142800 | 43 | 40 | 11       | 167      | 1354 | 64065  | 220,91 | 100              |
| chr6 | 66053903 | 66054094 | EYS    | NM_001142800 | 43 | 40 | 10       | 140      | 431  | 18085  | 94,19  | 100              |
| chr6 | 66063336 | 66063530 | EYS    | NM_001142800 | 43 | 40 | 9        | 160      | 489  | 21509  | 110,3  | 100              |
| chr6 | 66094238 | 66094423 | EYS    | NM_001142800 | 43 | 40 | 8        | 115      | 150  | 6860   | 36,88  | 100              |
| chr6 | 66112370 | 66112579 | EYS    | NM_001142800 | 43 | 40 | 7        | 128      | 199  | 9034   | 43,02  | 100              |
| chr6 | 66115075 | 66115257 | EYS    | NM_001142800 | 43 | 40 | 6        | 194      | 192  | 8093   | 44,22  | 94,3             |
| chr6 | 66200368 | 66200571 | EYS    | NM_001142800 | 43 | 40 | 5        | 114      | 72   | 2946   | 14,44  | 74,6             |
| chr6 | 66204541 | 66205372 | EYS    | NM_001142800 | 43 | 40 | 4        | 748      | 2763 | 132474 | 159,22 | 100              |
| chr6 | 70926525 | 70926719 | COL9A1 | NM_001851    | 38 | 38 | 38       | 185      | 220  | 9422   | 48,32  | 64,9             |
| chr6 | 70935543 | 70935758 | COL9A1 | NM_001851    | 38 | 38 | 37       | 78       | 505  | 22591  | 104,59 | 100              |
| chr6 | 70942351 | 70942536 | COL9A1 | NM_001851    | 38 | 38 | 36       | 189      | 125  | 5430   | 29,19  | 65,6             |
| chr6 | 70944183 | 70944368 | COL9A1 | NM_001851    | 38 | 38 | 35       | 55       | 656  | 27156  | 146    | 100              |
| chr6 | 70944544 | 70944732 | COL9A1 | NM_001851    | 38 | 38 | 34       | 147      | 271  | 12522  | 66,25  | 68               |
| chr6 | 70948932 | 70949132 | COL9A1 | NM_001851    | 38 | 38 | 33       | 33       | 95   | 4404   | 21,91  | 100              |
| chr6 | 70950385 | 70950588 | COL9A1 | NM_001851    | 38 | 38 | 32       | 45       | 856  | 39403  | 193,15 | 100              |
| chr6 | 70950976 | 70951170 | COL9A1 | NM_001851    | 38 | 38 | 31       | 36       | 1299 | 58653  | 300,78 | 100              |
| chr6 | 70951542 | 70951727 | COL9A1 | NM_001851    | 38 | 38 | 30       | 72       | 540  | 21664  | 116,47 | 84,7             |
| chr6 | 70952291 | 70952485 | COL9A1 | NM_001851    | 38 | 38 | 29       | 54       | 317  | 13197  | 67,68  | 100              |
| chr6 | 70961877 | 70962068 | COL9A1 | NM_001851    | 38 | 38 | 27       | 54       | 434  | 18880  | 98,33  | 100              |
| chr6 | 70963019 | 70963195 | COL9A1 | NM_001851    | 38 | 38 | 26       | 45       | 429  | 16849  | 95,19  | 100              |
| chr6 | 70964135 | 70964332 | COL9A1 | NM_001851    | 38 | 38 | 25       | 54       | 296  | 12581  | 63,54  | 100              |
| chr6 | 70964689 | 70965132 | COL9A1 | NM_001851    | 38 | 38 | 24,23,22 | 54,54,54 | 936  | 43281  | 97,48  | 57,4,100,0,100,0 |
| chr6 | 70966388 | 70966609 | COL9A1 | NM_001851    | 38 | 38 | 21       | 54       | 193  | 8327   | 37,51  | 100              |
| chr6 | 70970295 | 70970489 | COL9A1 | NM_001851    | 38 | 38 | 20       | 54       | 328  | 13039  | 66,87  | 100              |
| chr6 | 70972879 | 70973073 | COL9A1 | NM_001851    | 38 | 38 | 19       | 54       | 402  | 16924  | 86,79  | 100              |
| chr6 | 70976364 | 70976570 | COL9A1 | NM_001851    | 38 | 38 | 18       | 54       | 439  | 19790  | 95,6   | 100              |
| chr6 | 70978380 | 70978562 | COL9A1 | NM_001851    | 38 | 38 | 17       | 57       | 718  | 30584  | 167,13 | 98,2             |
| chr6 | 70979179 | 70979391 | COL9A1 | NM_001851    | 38 | 38 | 16       | 33       | 387  | 15924  | 74,76  | 100              |
| chr6 | 70979928 | 70980158 | COL9A1 | NM_001851    | 38 | 38 | 15       | 54       | 142  | 5855   | 25,35  | 100              |
| chr6 | 70981271 | 70981483 | COL9A1 | NM_001851    | 38 | 38 | 14       | 54       | 413  | 19327  | 90,74  | 100              |
| chr6 | 70981613 | 70981804 | COL9A1 | NM_001851    | 38 | 38 | 13       | 24       | 172  | 7369   | 38,38  | 100              |
| chr6 | 70983667 | 70983852 | COL9A1 | NM_001851    | 38 | 38 | 12       | 36       | 402  | 18228  | 98     | 100              |
| chr6 | 70984354 | 70984551 | COL9A1 | NM_001851    | 38 | 38 | 11       | 54       | 327  | 14756  | 74,53  | 100              |
| chr6 | 70990554 | 70990843 | COL9A1 | NM_001851    | 38 | 38 | 10,9     | 63,36    | 622  | 27551  | 95     | 38,1,100,0       |
| chr6 | 70990997 | 70991200 | COL9A1 | NM_001851    | 38 | 38 | 8        | 75       | 255  | 11051  | 54,17  | 100              |
| chr6 | 70992566 | 70992861 | COL9A1 | NM_001851    | 38 | 38 | 7        | 21       | 383  | 17429  | 58,88  | 100              |
| chr6 | 70993441 | 70993644 | COL9A1 | NM_001851    | 38 | 38 | 6        | 84       | 88   | 3539   | 17,35  | 98,8             |
| chr6 | 71003847 | 71004281 | COL9A1 | NM_001851    | 38 | 38 | 5        | 397      | 1290 | 58192  | 133,77 | 100              |
| chr6 | 71009731 | 71010103 | COL9A1 | NM_001851    | 38 | 38 | 4,3      | 133,78   | 630  | 27781  | 74,48  | 100,0,100,0      |
| chr6 | 71011655 | 71011855 | COL9A1 | NM_001851    | 38 | 38 | 2        | 74       | 87   | 3274   | 16,29  | 100              |
| chr6 | 71012538 | 71012723 | COL9A1 | NM_001851    | 38 | 38 | 1        | 14       | 1316 | 55032  | 295,87 | 100              |
| chr6 | 72596610 | 72596952 | RIMS1  | NM_014989    | 34 | 34 | 1        | 164      | 251  | 10356  | 30,19  | 100              |
| chr6 | 72678616 | 72678840 | RIMS1  | NM_014989    | 34 | 34 | 2        | 81       | 438  | 17981  | 79,92  | 100              |
| chr6 | 72806598 | 72806783 | RIMS1  | NM_014989    | 34 | 34 | 3        | 214      | 1665 | 71249  | 383,06 | 61,7             |
| chr6 | 72809592 | 72809771 | RIMS1  | NM_014989    | 34 | 34 | 4        | 12       | 149  | 6473   | 35,96  | 100              |
| chr6 | 72889255 | 72889642 | RIMS1  | NM_014989    | 34 | 34 | 5        | 341      | 500  | 23110  | 59,56  | 100              |
| chr6 | 72891908 | 72892831 | RIMS1  | NM_014989    | 34 | 34 | 6        | 866      | 466  | 21854  | 23,65  | 97,6             |
| chr6 | 72943433 | 72943633 | RIMS1  | NM_014989    | 34 | 34 | 7        | 68       | 537  | 22040  | 109,65 | 100              |
| chr6 | 72945293 | 72945499 | RIMS1  | NM_014989    | 34 | 34 | 8        | 111      | 554  | 24110  | 116,47 | 100              |
| chr6 | 72947490 | 72947672 | RIMS1  | NM_014989    | 34 | 34 | 9        | 100      | 109  | 4529   | 24,75  | 100              |
| chr6 | 72951993 | 72952163 | RIMS1  | NM_014989    | 34 | 34 | 10       | 124      | 52   | 2192   | 12,82  | 100              |

|      |           |           |        |              |    |    |       |         |      |        |        |            |
|------|-----------|-----------|--------|--------------|----|----|-------|---------|------|--------|--------|------------|
| chr6 | 72955398  | 72955598  | RIMS1  | NM_014989    | 34 | 34 | 11    | 47      | 474  | 19435  | 96,69  | 100        |
| chr6 | 72957700  | 72957900  | RIMS1  | NM_014989    | 34 | 34 | 12    | 113     | 214  | 8602   | 42,8   | 100        |
| chr6 | 72959982  | 72960164  | RIMS1  | NM_014989    | 34 | 34 | 13    | 131     | 558  | 25255  | 138,01 | 100        |
| chr6 | 72960681  | 72961124  | RIMS1  | NM_014989    | 34 | 34 | 14,15 | 172.154 | 1272 | 57206  | 128,84 | 66.9,100.0 |
| chr6 | 72962354  | 72962527  | RIMS1  | NM_014989    | 34 | 34 | 16    | 72      | 888  | 36806  | 211,53 | 88,9       |
| chr6 | 72967850  | 72968065  | RIMS1  | NM_014989    | 34 | 34 | 17    | 157     | 668  | 29084  | 134,65 | 86         |
| chr6 | 72968660  | 72968848  | RIMS1  | NM_014989    | 34 | 34 | 18    | 126     | 253  | 10964  | 58,01  | 100        |
| chr6 | 72970358  | 72970570  | RIMS1  | NM_014989    | 34 | 34 | 19    | 63      | 206  | 8702   | 40,85  | 100        |
| chr6 | 72974625  | 72974813  | RIMS1  | NM_014989    | 34 | 34 | 20    | 78      | 247  | 9568   | 50,62  | 100        |
| chr6 | 72975088  | 72975264  | RIMS1  | NM_014989    | 34 | 34 | 21    | 114     | 231  | 9866   | 55,74  | 100        |
| chr6 | 72975553  | 72975783  | RIMS1  | NM_014989    | 34 | 34 | 22    | 90      | 270  | 11367  | 49,21  | 100        |
| chr6 | 72983939  | 72984118  | RIMS1  | NM_014989    | 34 | 34 | 23    | 84      | 254  | 11187  | 62,15  | 79,8       |
| chr6 | 72993715  | 72993921  | RIMS1  | NM_014989    | 34 | 34 | 24    | 72      | 385  | 17053  | 82,38  | 100        |
| chr6 | 73000300  | 73000512  | RIMS1  | NM_014989    | 34 | 34 | 25    | 183     | 367  | 15977  | 75,01  | 71,6       |
| chr6 | 73001547  | 73001771  | RIMS1  | NM_014989    | 34 | 34 | 26    | 113     | 842  | 36389  | 161,73 | 100        |
| chr6 | 73016892  | 73017089  | RIMS1  | NM_014989    | 34 | 34 | 27    | 113     | 220  | 10299  | 52,02  | 100        |
| chr6 | 73023137  | 73023316  | RIMS1  | NM_014989    | 34 | 34 | 28    | 167     | 337  | 13277  | 73,76  | 64,7       |
| chr6 | 73043271  | 73043572  | RIMS1  | NM_014989    | 34 | 34 | 29    | 236     | 789  | 38267  | 126,71 | 100        |
| chr6 | 73100241  | 73100432  | RIMS1  | NM_014989    | 34 | 34 | 30    | 139     | 338  | 14395  | 74,97  | 95,7       |
| chr6 | 73102352  | 73102555  | RIMS1  | NM_014989    | 34 | 34 | 31    | 113     | 210  | 9126   | 44,74  | 100        |
| chr6 | 73107895  | 73108107  | RIMS1  | NM_014989    | 34 | 34 | 32    | 102     | 240  | 10724  | 50,35  | 100        |
| chr6 | 73108641  | 73108820  | RIMS1  | NM_014989    | 34 | 34 | 33    | 140     | 565  | 23007  | 127,82 | 100        |
| chr6 | 73110232  | 73110512  | RIMS1  | NM_014989    | 34 | 34 | 34    | 219     | 431  | 18400  | 65,48  | 84,5       |
| chr6 | 80196671  | 80197579  | LCA5   | NM_181714    | 9  | 7  | 9     | 863     | 2571 | 123378 | 135,73 | 99,5       |
| chr6 | 80198724  | 80198924  | LCA5   | NM_181714    | 9  | 7  | 8     | 133     | 212  | 8805   | 43,81  | 93,2       |
| chr6 | 80201290  | 80201460  | LCA5   | NM_181714    | 9  | 7  | 7     | 143     | 478  | 20486  | 119,8  | 100        |
| chr6 | 80202281  | 80202475  | LCA5   | NM_181714    | 9  | 7  | 6     | 97      | 518  | 22498  | 115,37 | 86,6       |
| chr6 | 80203340  | 80203516  | LCA5   | NM_181714    | 9  | 7  | 5     | 138     | 222  | 9400   | 53,11  | 92,8       |
| chr6 | 80222924  | 80223533  | LCA5   | NM_181714    | 9  | 7  | 4     | 530     | 1481 | 68955  | 113,04 | 100        |
| chr6 | 80228369  | 80228705  | LCA5   | NM_181714    | 9  | 7  | 3     | 190     | 949  | 44690  | 132,61 | 100        |
| chr6 | 80626277  | 80626634  | ELOVL4 | NM_022726    | 6  | 6  | 6     | 276     | 219  | 10384  | 29,01  | 100        |
| chr6 | 80629079  | 80629258  | ELOVL4 | NM_022726    | 6  | 6  | 5     | 128     | 300  | 13208  | 73,38  | 95,3       |
| chr6 | 80631252  | 80631464  | ELOVL4 | NM_022726    | 6  | 6  | 4     | 172     | 476  | 20677  | 97,08  | 71,5       |
| chr6 | 80634608  | 80634808  | ELOVL4 | NM_022726    | 6  | 6  | 3     | 81      | 232  | 10502  | 52,25  | 100        |
| chr6 | 80635934  | 80636131  | ELOVL4 | NM_022726    | 6  | 6  | 2     | 188     | 352  | 15226  | 76,9   | 87,8       |
| chr6 | 80656869  | 80657146  | ELOVL4 | NM_022726    | 6  | 6  | 1     | 100     | 130  | 6175   | 22,21  | 100        |
| chr6 | 135606564 | 135606847 | AHI1   | NM_001134831 | 29 | 26 | 29    | 3       | 781  | 37108  | 130,66 | 100        |
| chr6 | 135611502 | 135611711 | AHI1   | NM_001134831 | 29 | 26 | 28    | 103     | 281  | 12403  | 59,06  | 100        |
| chr6 | 135621593 | 135621811 | AHI1   | NM_001134831 | 29 | 26 | 27    | 59      | 479  | 21910  | 100,05 | 100        |
| chr6 | 135639643 | 135639843 | AHI1   | NM_001134831 | 29 | 26 | 26    | 98      | 57   | 1973   | 9,82   | 100        |
| chr6 | 135644280 | 135644477 | AHI1   | NM_001134831 | 29 | 26 | 25    | 163     | 500  | 21736  | 109,78 | 100        |
| chr6 | 135679211 | 135679381 | AHI1   | NM_001134831 | 29 | 26 | 24    | 56      | 637  | 26519  | 155,08 | 100        |
| chr6 | 135715843 | 135716105 | AHI1   | NM_001134831 | 29 | 26 | 23    | 121     | 318  | 14639  | 55,66  | 100        |
| chr6 | 135725953 | 135726129 | AHI1   | NM_001134831 | 29 | 26 | 22    | 27      | 471  | 20283  | 114,59 | 100        |
| chr6 | 135732477 | 135732668 | AHI1   | NM_001134831 | 29 | 26 | 21    | 197     | 704  | 30706  | 159,93 | 92,9       |
| chr6 | 135748286 | 135748462 | AHI1   | NM_001134831 | 29 | 26 | 20    | 141     | 491  | 19415  | 109,69 | 100        |
| chr6 | 135749707 | 135749901 | AHI1   | NM_001134831 | 29 | 26 | 19    | 131     | 724  | 33910  | 173,9  | 100        |
| chr6 | 135750906 | 135751115 | AHI1   | NM_001134831 | 29 | 26 | 18    | 119     | 413  | 18660  | 88,86  | 80,7       |
| chr6 | 135752334 | 135752537 | AHI1   | NM_001134831 | 29 | 26 | 17    | 107     | 527  | 23746  | 116,4  | 100        |
| chr6 | 135754123 | 135754373 | AHI1   | NM_001134831 | 29 | 26 | 16    | 230     | 900  | 42585  | 169,66 | 90,9       |
| chr6 | 135759446 | 135759634 | AHI1   | NM_001134831 | 29 | 26 | 15    | 124     | 330  | 13595  | 71,93  | 98,4       |
| chr6 | 135763691 | 135763870 | AHI1   | NM_001134831 | 29 | 26 | 14    | 133     | 78   | 3263   | 18,13  | 100        |
| chr6 | 135768109 | 135768321 | AHI1   | NM_001134831 | 29 | 26 | 13    | 153     | 510  | 22441  | 105,36 | 100        |
| chr6 | 135769419 | 135769628 | AHI1   | NM_001134831 | 29 | 26 | 12    | 186     | 348  | 14316  | 68,17  | 100        |

|      |           |           |       |              |    |    |       |        |      |        |        |             |
|------|-----------|-----------|-------|--------------|----|----|-------|--------|------|--------|--------|-------------|
| chr6 | 135774395 | 135774607 | AHI1  | NM_001134831 | 29 | 26 | 11    | 96     | 484  | 19544  | 91,76  | 100         |
| chr6 | 135776852 | 135777067 | AHI1  | NM_001134831 | 29 | 26 | 10    | 193    | 101  | 4266   | 19,75  | 100         |
| chr6 | 135778642 | 135778904 | AHI1  | NM_001134831 | 29 | 26 | 9     | 220    | 629  | 29447  | 111,97 | 95,5        |
| chr6 | 135784255 | 135784437 | AHI1  | NM_001134831 | 29 | 26 | 8     | 182    | 216  | 9478   | 51,79  | 96,2        |
| chr6 | 135786864 | 135787464 | AHI1  | NM_001134831 | 29 | 26 | 7     | 560    | 2882 | 138444 | 230,36 | 91,6        |
| chr6 | 135788707 | 135788916 | AHI1  | NM_001134831 | 29 | 26 | 6     | 54     | 234  | 9633   | 45,87  | 100         |
| chr6 | 135811667 | 135811941 | AHI1  | NM_001134831 | 29 | 26 | 5     | 125    | 379  | 16944  | 61,61  | 100         |
| chr6 | 135813349 | 135813528 | AHI1  | NM_001134831 | 29 | 26 | 4     | 10     | 202  | 8206   | 45,59  | 100         |
| chr6 | 137143650 | 137143862 | PEX7  | NM_000288    | 10 | 10 | 1     | 130    | 67   | 2890   | 13,57  | 45,4        |
| chr6 | 137146265 | 137146435 | PEX7  | NM_000288    | 10 | 10 | 2     | 58     | 230  | 10112  | 59,13  | 100         |
| chr6 | 137147413 | 137147595 | PEX7  | NM_000288    | 10 | 10 | 3     | 151    | 617  | 23838  | 130,26 | 92,1        |
| chr6 | 137166694 | 137166891 | PEX7  | NM_000288    | 10 | 10 | 4     | 78     | 204  | 8634   | 43,61  | 100         |
| chr6 | 137167179 | 137167358 | PEX7  | NM_000288    | 10 | 10 | 5     | 109    | 398  | 16364  | 90,91  | 100         |
| chr6 | 137187687 | 137187875 | PEX7  | NM_000288    | 10 | 10 | 6     | 107    | 422  | 18083  | 95,68  | 100         |
| chr6 | 137190948 | 137191166 | PEX7  | NM_000288    | 10 | 10 | 7     | 114    | 398  | 17664  | 80,66  | 100         |
| chr6 | 137193275 | 137193454 | PEX7  | NM_000288    | 10 | 10 | 8     | 56     | 307  | 13786  | 76,59  | 100         |
| chr6 | 137219256 | 137219468 | PEX7  | NM_000288    | 10 | 10 | 9     | 100    | 598  | 25776  | 121,01 | 100         |
| chr6 | 137234494 | 137234774 | PEX7  | NM_000288    | 10 | 10 | 10    | 69     | 673  | 30507  | 108,57 | 100         |
| chr7 | 23145553  | 23145809  | KLHL7 | NM_001031710 | 11 | 11 | 1     | 120    | 191  | 8323   | 32,39  | 100         |
| chr7 | 23163310  | 23163513  | KLHL7 | NM_001031710 | 11 | 11 | 2     | 103    | 142  | 6106   | 29,93  | 100         |
| chr7 | 23164193  | 23164381  | KLHL7 | NM_001031710 | 11 | 11 | 3     | 94     | 374  | 15827  | 83,74  | 79,8        |
| chr7 | 23164628  | 23164819  | KLHL7 | NM_001031710 | 11 | 11 | 4     | 125    | 368  | 15749  | 82,03  | 100         |
| chr7 | 23180393  | 23180593  | KLHL7 | NM_001031710 | 11 | 11 | 5     | 176    | 289  | 12741  | 63,39  | 97,2        |
| chr7 | 23183399  | 23183599  | KLHL7 | NM_001031710 | 11 | 11 | 6     | 175    | 597  | 24829  | 123,53 | 74,3        |
| chr7 | 23191650  | 23191841  | KLHL7 | NM_001031710 | 11 | 11 | 7     | 143    | 521  | 21043  | 109,6  | 100         |
| chr7 | 23205350  | 23205624  | KLHL7 | NM_001031710 | 11 | 11 | 8     | 241    | 778  | 34514  | 125,51 | 86,3        |
| chr7 | 23207440  | 23207670  | KLHL7 | NM_001031710 | 11 | 11 | 9     | 202    | 184  | 8327   | 36,05  | 100         |
| chr7 | 23212527  | 23212715  | KLHL7 | NM_001031710 | 11 | 11 | 10    | 98     | 226  | 9643   | 51,02  | 100         |
| chr7 | 23213611  | 23213950  | KLHL7 | NM_001031710 | 11 | 11 | 11    | 284    | 892  | 41508  | 122,08 | 100         |
| chr7 | 33135960  | 33136160  | RP9   | NM_203288    | 6  | 6  | 5     | 62     | 506  | 23135  | 115,1  | 90,3        |
| chr7 | 33136900  | 33137073  | RP9   | NM_203288    | 6  | 6  | 4     | 92     | 66   | 2539   | 14,59  | 81,5        |
| chr7 | 33138958  | 33139137  | RP9   | NM_203288    | 6  | 6  | 3     | 130    | 548  | 22124  | 122,91 | 70          |
| chr7 | 33148870  | 33149073  | RP9   | NM_203288    | 6  | 6  | 1     | 152    | 0    | 0      | 0      | 75,7        |
| chr7 | 33185875  | 33186063  | BBS9  | NM_198428    | 23 | 22 | 2     | 112    | 214  | 9535   | 50,45  | 91,1        |
| chr7 | 33192296  | 33192490  | BBS9  | NM_198428    | 23 | 22 | 3     | 151    | 205  | 8693   | 44,58  | 100         |
| chr7 | 33195196  | 33195366  | BBS9  | NM_198428    | 23 | 22 | 4     | 65     | 74   | 2834   | 16,57  | 100         |
| chr7 | 33217010  | 33217204  | BBS9  | NM_198428    | 23 | 22 | 5     | 114    | 265  | 10972  | 56,27  | 100         |
| chr7 | 33296825  | 33297034  | BBS9  | NM_198428    | 23 | 22 | 6     | 175    | 262  | 11570  | 55,1   | 100         |
| chr7 | 33303876  | 33304058  | BBS9  | NM_198428    | 23 | 22 | 7     | 85     | 138  | 6039   | 33     | 100         |
| chr7 | 33312612  | 33312803  | BBS9  | NM_198428    | 23 | 22 | 8     | 184    | 211  | 8536   | 44,46  | 97,8        |
| chr7 | 33313439  | 33313627  | BBS9  | NM_198428    | 23 | 22 | 9     | 130    | 446  | 19232  | 101,76 | 100         |
| chr7 | 33376016  | 33376210  | BBS9  | NM_198428    | 23 | 22 | 10    | 182    | 120  | 4929   | 25,28  | 86,8        |
| chr7 | 33380509  | 33380703  | BBS9  | NM_198428    | 23 | 22 | 11    | 77     | 435  | 18427  | 94,5   | 100         |
| chr7 | 33384107  | 33384319  | BBS9  | NM_198428    | 23 | 22 | 12    | 54     | 175  | 7245   | 34,01  | 100         |
| chr7 | 33388650  | 33388832  | BBS9  | NM_198428    | 23 | 22 | 13    | 103    | 497  | 21204  | 115,87 | 100         |
| chr7 | 33390576  | 33391004  | BBS9  | NM_198428    | 23 | 22 | 14    | 105    | 644  | 30783  | 71,76  | 100         |
| chr7 | 33392362  | 33392544  | BBS9  | NM_198428    | 23 | 22 | 15    | 15     | 1073 | 44402  | 242,63 | 100         |
| chr7 | 33397412  | 33397692  | BBS9  | NM_198428    | 23 | 22 | 16    | 141    | 602  | 28073  | 99,9   | 100         |
| chr7 | 33407290  | 33407490  | BBS9  | NM_198428    | 23 | 22 | 17    | 96     | 347  | 15777  | 78,49  | 100         |
| chr7 | 33423269  | 33423451  | BBS9  | NM_198428    | 23 | 22 | 18    | 173    | 208  | 8487   | 46,38  | 100         |
| chr7 | 33427591  | 33427788  | BBS9  | NM_198428    | 23 | 22 | 19    | 153    | 603  | 26640  | 134,55 | 100         |
| chr7 | 33545008  | 33545196  | BBS9  | NM_198428    | 23 | 22 | 20    | 183    | 362  | 15864  | 83,94  | 66,7        |
| chr7 | 33573604  | 33573890  | BBS9  | NM_198428    | 23 | 22 | 21    | 223    | 1614 | 72824  | 253,74 | 83          |
| chr7 | 33644454  | 33644977  | BBS9  | NM_198428    | 23 | 22 | 22,23 | 111,32 | 1074 | 51230  | 97,77  | 100,0,100,0 |

|      |           |           |          |              |    |    |       |         |      |        |        |            |
|------|-----------|-----------|----------|--------------|----|----|-------|---------|------|--------|--------|------------|
| chr7 | 92116628  | 92116831  | PEX1     | NM_000466    | 24 | 24 | 24    | 85      | 166  | 7628   | 37,39  | 71,8       |
| chr7 | 92118574  | 92118768  | PEX1     | NM_000466    | 24 | 24 | 23    | 131     | 195  | 8361   | 42,88  | 100        |
| chr7 | 92118966  | 92119163  | PEX1     | NM_000466    | 24 | 24 | 22    | 198     | 259  | 10820  | 54,65  | 68,7       |
| chr7 | 92120566  | 92120852  | PEX1     | NM_000466    | 24 | 24 | 21    | 231     | 642  | 28274  | 98,52  | 100        |
| chr7 | 92122213  | 92122475  | PEX1     | NM_000466    | 24 | 24 | 20    | 177     | 442  | 21068  | 80,11  | 100        |
| chr7 | 92123648  | 92124002  | PEX1     | NM_000466    | 24 | 24 | 19,18 | 104.143 | 861  | 39953  | 112,54 | 60,6,100,0 |
| chr7 | 92125937  | 92126113  | PEX1     | NM_000466    | 24 | 24 | 17    | 65      | 76   | 3453   | 19,51  | 100        |
| chr7 | 92128996  | 92129169  | PEX1     | NM_000466    | 24 | 24 | 16    | 135     | 176  | 7588   | 43,61  | 100        |
| chr7 | 92130791  | 92131009  | PEX1     | NM_000466    | 24 | 24 | 15    | 167     | 388  | 16344  | 74,63  | 100        |
| chr7 | 92131168  | 92131362  | PEX1     | NM_000466    | 24 | 24 | 14    | 190     | 463  | 20156  | 103,36 | 83,7       |
| chr7 | 92132316  | 92132501  | PEX1     | NM_000466    | 24 | 24 | 13    | 155     | 487  | 20288  | 109,08 | 94,8       |
| chr7 | 92134105  | 92134281  | PEX1     | NM_000466    | 24 | 24 | 12    | 171     | 1624 | 66467  | 375,52 | 65,5       |
| chr7 | 92135488  | 92135664  | PEX1     | NM_000466    | 24 | 24 | 11    | 97      | 471  | 19290  | 108,98 | 100        |
| chr7 | 92136258  | 92136488  | PEX1     | NM_000466    | 24 | 24 | 10    | 133     | 452  | 20938  | 90,64  | 100        |
| chr7 | 92138619  | 92138825  | PEX1     | NM_000466    | 24 | 24 | 9     | 83      | 498  | 19972  | 96,48  | 100        |
| chr7 | 92140170  | 92140364  | PEX1     | NM_000466    | 24 | 24 | 8     | 104     | 197  | 7985   | 40,95  | 100        |
| chr7 | 92140867  | 92141043  | PEX1     | NM_000466    | 24 | 24 | 7     | 124     | 205  | 8742   | 49,39  | 100        |
| chr7 | 92143103  | 92143285  | PEX1     | NM_000466    | 24 | 24 | 6     | 120     | 222  | 9259   | 50,6   | 100        |
| chr7 | 92146636  | 92147624  | PEX1     | NM_000466    | 24 | 24 | 5,4   | 767.115 | 2581 | 119790 | 121,12 | 94,0,100,0 |
| chr7 | 92148229  | 92148405  | PEX1     | NM_000466    | 24 | 24 | 3     | 84      | 262  | 11739  | 66,32  | 100        |
| chr7 | 92151381  | 92151593  | PEX1     | NM_000466    | 24 | 24 | 2     | 144     | 1066 | 45606  | 214,11 | 100        |
| chr7 | 92157582  | 92157859  | PEX1     | NM_000466    | 24 | 24 | 1     | 129     | 9    | 407    | 1,46   | 100        |
| chr7 | 120428579 | 120428989 | TSPAN12  | NM_012338    | 8  | 7  | 8     | 306     | 1661 | 76905  | 187,12 | 100        |
| chr7 | 120446559 | 120446777 | TSPAN12  | NM_012338    | 8  | 7  | 7     | 144     | 411  | 17714  | 80,89  | 100        |
| chr7 | 120450473 | 120450658 | TSPAN12  | NM_012338    | 8  | 7  | 6     | 108     | 1151 | 50645  | 272,28 | 100        |
| chr7 | 120455776 | 120455994 | TSPAN12  | NM_012338    | 8  | 7  | 5     | 75      | 172  | 7196   | 32,86  | 100        |
| chr7 | 120478810 | 120478983 | TSPAN12  | NM_012338    | 8  | 7  | 4     | 136     | 469  | 19890  | 114,31 | 100        |
| chr7 | 120480066 | 120480236 | TSPAN12  | NM_012338    | 8  | 7  | 3     | 83      | 321  | 13860  | 81,05  | 100        |
| chr7 | 120496646 | 120496858 | TSPAN12  | NM_012338    | 8  | 7  | 2     | 66      | 327  | 13710  | 64,37  | 100        |
| chr7 | 128033042 | 128033162 | IMPDH1   | NM_000883    | 17 | 17 | 17    | 22      | 9    | 285    | 2,36   | 100        |
| chr7 | 128034384 | 128034557 | IMPDH1   | NM_000883    | 17 | 17 | 16,15 | 84.144  | 237  | 9427   | 54,18  | 38.1,33.3  |
| chr7 | 128034618 | 128034738 | IMPDH1   | NM_000883    | 17 | 17 | 15    | 144     | 146  | 5054   | 41,77  | 25         |
| chr7 | 128034990 | 128035240 | IMPDH1   | NM_000883    | 17 | 17 | 14,13 | 145.144 | 113  | 5153   | 20,53  | 67.6,38.9  |
| chr7 | 128035310 | 128035430 | IMPDH1   | NM_000883    | 17 | 17 | 13    | 144     | 42   | 1571   | 12,98  | 13,2       |
| chr7 | 128036741 | 128036861 | IMPDH1   | NM_000883    | 17 | 17 | 12    | 96      | 15   | 580    | 4,79   | 9,4        |
| chr7 | 128038622 | 128038742 | IMPDH1   | NM_000883    | 17 | 17 | 10    | 200     | 31   | 1122   | 9,27   | 23         |
| chr7 | 128040210 | 128040395 | IMPDH1   | NM_000883    | 17 | 17 | 9,8   | 88.207  | 228  | 8895   | 47,82  | 30.7,4.3   |
| chr7 | 128040545 | 128040665 | IMPDH1   | NM_000883    | 17 | 17 | 8     | 207     | 36   | 1472   | 12,17  | 23,7       |
| chr7 | 128040909 | 128041085 | IMPDH1   | NM_000883    | 17 | 17 | 7,6   | 75.102  | 586  | 23960  | 135,37 | 49.3,16.7  |
| chr7 | 128041140 | 128041260 | IMPDH1   | NM_000883    | 17 | 17 | 6     | 102     | 285  | 10496  | 86,74  | 30,4       |
| chr7 | 128043758 | 128043928 | IMPDH1   | NM_000883    | 17 | 17 | 5     | 49      | 215  | 9299   | 54,38  | 100        |
| chr7 | 128045885 | 128046085 | IMPDH1   | NM_000883    | 17 | 17 | 4     | 99      | 0    | 0      | 0      | 35,4       |
| chr7 | 128049358 | 128049570 | IMPDH1   | NM_000883    | 17 | 17 | 3,2   | 64.44   | 538  | 24304  | 114,1  | 76.6,100.0 |
| chr7 | 128049853 | 128050044 | IMPDH1   | NM_000883    | 17 | 17 | 1     | 146     | 1    | 35     | 0,18   | 70,5       |
| chr7 | 128412529 | 128412741 | OPN1SW   | NM_001708    | 5  | 5  | 5     | 120     | 142  | 6346   | 29,79  | 100        |
| chr7 | 128413625 | 128413893 | OPN1SW   | NM_001708    | 5  | 5  | 4     | 240     | 494  | 23338  | 86,76  | 79,6       |
| chr7 | 128414474 | 128414659 | OPN1SW   | NM_001708    | 5  | 5  | 3     | 166     | 414  | 17612  | 94,69  | 65,1       |
| chr7 | 128414948 | 128415163 | OPN1SW   | NM_001708    | 5  | 5  | 2     | 169     | 724  | 32488  | 150,41 | 73,4       |
| chr7 | 128415542 | 128415920 | OPN1SW   | NM_001708    | 5  | 5  | 1     | 352     | 475  | 21182  | 55,89  | 86,1       |
| chr7 | 138522549 | 138522980 | KIAA1549 | NM_001164665 | 20 | 20 | 20    | 255     | 793  | 36187  | 83,77  | 100        |
| chr7 | 138524840 | 138525064 | KIAA1549 | NM_001164665 | 20 | 20 | 19    | 146     | 498  | 22279  | 99,02  | 100        |
| chr7 | 138528967 | 138529164 | KIAA1549 | NM_001164665 | 20 | 20 | 18    | 158     | 300  | 13727  | 69,33  | 65,2       |
| chr7 | 138536906 | 138537082 | KIAA1549 | NM_001164665 | 20 | 20 | 17    | 47      | 142  | 5790   | 32,71  | 100        |
| chr7 | 138545916 | 138546297 | KIAA1549 | NM_001164665 | 20 | 20 | 16    | 318     | 232  | 10560  | 27,64  | 90,3       |

|      |           |           |          |              |    |    |    |      |       |        |        |      |
|------|-----------|-----------|----------|--------------|----|----|----|------|-------|--------|--------|------|
| chr7 | 138552771 | 138552968 | KIAA1549 | NM_001164665 | 20 | 20 | 15 | 154  | 302   | 12563  | 63,45  | 67,5 |
| chr7 | 138554284 | 138554573 | KIAA1549 | NM_001164665 | 20 | 20 | 14 | 224  | 228   | 10790  | 37,21  | 100  |
| chr7 | 138555973 | 138556176 | KIAA1549 | NM_001164665 | 20 | 20 | 13 | 206  | 423   | 19146  | 93,85  | 66   |
| chr7 | 138564315 | 138564494 | KIAA1549 | NM_001164665 | 20 | 20 | 12 | 116  | 247   | 10750  | 59,72  | 73,3 |
| chr7 | 138566158 | 138566364 | KIAA1549 | NM_001164665 | 20 | 20 | 11 | 197  | 456   | 19760  | 95,46  | 87,8 |
| chr7 | 138579124 | 138579330 | KIAA1549 | NM_001164665 | 20 | 20 | 10 | 185  | 1850  | 80714  | 389,92 | 80,5 |
| chr7 | 138583732 | 138583929 | KIAA1549 | NM_001164665 | 20 | 20 | 9  | 178  | 38    | 1709   | 8,63   | 82,6 |
| chr7 | 138588337 | 138588525 | KIAA1549 | NM_001164665 | 20 | 20 | 8  | 149  | 348   | 15523  | 82,13  | 98   |
| chr7 | 138589696 | 138589887 | KIAA1549 | NM_001164665 | 20 | 20 | 7  | 60   | 525   | 24488  | 127,54 | 100  |
| chr7 | 138591676 | 138591891 | KIAA1549 | NM_001164665 | 20 | 20 | 6  | 184  | 24    | 1096   | 5,07   | 94   |
| chr7 | 138593767 | 138593952 | KIAA1549 | NM_001164665 | 20 | 20 | 5  | 131  | 160   | 6995   | 37,61  | 77,1 |
| chr7 | 138595846 | 138596058 | KIAA1549 | NM_001164665 | 20 | 20 | 4  | 178  | 296   | 13666  | 64,16  | 93,8 |
| chr7 | 138597136 | 138597324 | KIAA1549 | NM_001164665 | 20 | 20 | 3  | 89   | 1012  | 42336  | 224    | 79,8 |
| chr7 | 138601521 | 138604287 | KIAA1549 | NM_001164665 | 20 | 20 | 2  | 2691 | 5485  | 264144 | 95,46  | 99   |
| chr7 | 138665731 | 138666026 | KIAA1549 | NM_001164665 | 20 | 20 | 1  | 187  | 14    | 607    | 2,05   | 100  |
| chr8 | 10464321  | 10464983  | RP1L1    | NM_178857    | 4  | 3  | 4  | 6452 | 1526  | 68460  | 103,26 | 9    |
| chr8 | 10465358  | 10465558  | RP1L1    | NM_178857    | 4  | 3  | 4  | 6452 | 1884  | 63408  | 315,46 | 3,1  |
| chr8 | 10465613  | 10465943  | RP1L1    | NM_178857    | 4  | 3  | 4  | 6452 | 2363  | 91572  | 276,65 | 5,1  |
| chr8 | 10466084  | 10470933  | RP1L1    | NM_178857    | 4  | 3  | 4  | 6452 | 12931 | 592440 | 122,15 | 74   |
| chr8 | 10473869  | 10474054  | RP1L1    | NM_178857    | 4  | 3  | 3  | 142  | 496   | 20039  | 107,74 | 69,7 |
| chr8 | 10480012  | 10480692  | RP1L1    | NM_178857    | 4  | 3  | 2  | 609  | 290   | 13609  | 19,98  | 96,9 |
| chr8 | 38854411  | 38854623  | ADAM9    | NM_003816    | 22 | 22 | 1  | 97   | 43    | 1532   | 7,19   | 42,3 |
| chr8 | 38865383  | 38865598  | ADAM9    | NM_003816    | 22 | 22 | 2  | 98   | 107   | 4296   | 19,89  | 100  |
| chr8 | 38869159  | 38869377  | ADAM9    | NM_003816    | 22 | 22 | 3  | 59   | 411   | 17338  | 79,17  | 100  |
| chr8 | 38871473  | 38871694  | ADAM9    | NM_003816    | 22 | 22 | 4  | 79   | 373   | 16485  | 74,26  | 100  |
| chr8 | 38873482  | 38873768  | ADAM9    | NM_003816    | 22 | 22 | 5  | 77   | 973   | 42588  | 148,39 | 100  |
| chr8 | 38874765  | 38874977  | ADAM9    | NM_003816    | 22 | 22 | 6  | 196  | 320   | 13623  | 63,96  | 86,2 |
| chr8 | 38876292  | 38876507  | ADAM9    | NM_003816    | 22 | 22 | 7  | 66   | 591   | 24807  | 114,85 | 100  |
| chr8 | 38879097  | 38879297  | ADAM9    | NM_003816    | 22 | 22 | 8  | 72   | 262   | 11789  | 58,65  | 100  |
| chr8 | 38880656  | 38880874  | ADAM9    | NM_003816    | 22 | 22 | 9  | 170  | 193   | 8673   | 39,6   | 100  |
| chr8 | 38883286  | 38883501  | ADAM9    | NM_003816    | 22 | 22 | 10 | 82   | 244   | 11015  | 51     | 100  |
| chr8 | 38884132  | 38884320  | ADAM9    | NM_003816    | 22 | 22 | 11 | 134  | 922   | 40285  | 213,15 | 93,3 |
| chr8 | 38899477  | 38899695  | ADAM9    | NM_003816    | 22 | 22 | 12 | 172  | 134   | 5862   | 26,77  | 93   |
| chr8 | 38911954  | 38912133  | ADAM9    | NM_003816    | 22 | 22 | 13 | 93   | 304   | 13183  | 73,24  | 100  |
| chr8 | 38913063  | 38913272  | ADAM9    | NM_003816    | 22 | 22 | 14 | 196  | 437   | 18640  | 88,76  | 90,3 |
| chr8 | 38928772  | 38928969  | ADAM9    | NM_003816    | 22 | 22 | 15 | 106  | 148   | 6553   | 33,1   | 100  |
| chr8 | 38934729  | 38934953  | ADAM9    | NM_003816    | 22 | 22 | 16 | 184  | 153   | 6979   | 31,02  | 100  |
| chr8 | 38940156  | 38940344  | ADAM9    | NM_003816    | 22 | 22 | 17 | 81   | 364   | 16744  | 88,59  | 100  |
| chr8 | 38940497  | 38940700  | ADAM9    | NM_003816    | 22 | 22 | 18 | 106  | 142   | 5642   | 27,66  | 90,6 |
| chr8 | 38947518  | 38947706  | ADAM9    | NM_003816    | 22 | 22 | 19 | 142  | 516   | 20782  | 109,96 | 99,3 |
| chr8 | 38948733  | 38948912  | ADAM9    | NM_003816    | 22 | 22 | 20 | 88   | 280   | 11722  | 65,12  | 100  |
| chr8 | 38959330  | 38959518  | ADAM9    | NM_003816    | 22 | 22 | 21 | 68   | 540   | 22866  | 120,98 | 100  |
| chr8 | 38961049  | 38961323  | ADAM9    | NM_003816    | 22 | 22 | 22 | 94   | 469   | 22099  | 80,36  | 100  |
| chr8 | 55533419  | 55534108  | RP1      | NM_006269    | 4  | 3  | 2  | 615  | 2451  | 115614 | 167,56 | 94,6 |
| chr8 | 55534734  | 55534922  | RP1      | NM_006269    | 4  | 3  | 3  | 172  | 431   | 18236  | 96,49  | 66,9 |
| chr8 | 55537255  | 55542999  | RP1      | NM_006269    | 4  | 3  | 4  | 5684 | 12009 | 581716 | 101,26 | 99,6 |
| chr8 | 63973698  | 63974049  | TTPA     | NM_000370    | 5  | 5  | 5  | 174  | 437   | 20332  | 57,76  | 100  |
| chr8 | 63976650  | 63976853  | TTPA     | NM_000370    | 5  | 5  | 4  | 111  | 351   | 14637  | 71,75  | 80,2 |
| chr8 | 63978444  | 63978668  | TTPA     | NM_000370    | 5  | 5  | 5  | 194  | 378   | 16555  | 73,58  | 100  |
| chr8 | 63985464  | 63985655  | TTPA     | NM_000370    | 5  | 5  | 2  | 154  | 252   | 10601  | 55,21  | 100  |
| chr8 | 63998284  | 63998579  | TTPA     | NM_000370    | 5  | 5  | 1  | 204  | 4     | 104    | 0,35   | 99,5 |
| chr8 | 77895377  | 77896472  | PEX2     | NM_000318    | 4  | 1  | 4  | 918  | 1924  | 89224  | 81,41  | 100  |
| chr8 | 77911946  | 77912229  | PEX2     | NM_000318    | 4  | 1  | 1  | 299  | 286   | 12674  | 44,63  | 1,3  |
| chr8 | 87587929  | 87588286  | CNGB3    | NM_019098    | 18 | 18 | 18 | 327  | 601   | 28582  | 79,84  | 78   |



|      |           |           |         |           |    |    |       |         |       |        |        |             |
|------|-----------|-----------|---------|-----------|----|----|-------|---------|-------|--------|--------|-------------|
| chr8 | 87590966  | 87591172  | CNGB3   | NM_019098 | 18 | 18 | 17    | 175     | 480   | 20598  | 99,51  | 72          |
| chr8 | 87591258  | 87591431  | CNGB3   | NM_019098 | 18 | 18 | 16    | 147     | 221   | 10119  | 58,16  | 66,7        |
| chr8 | 87616279  | 87616470  | CNGB3   | NM_019098 | 18 | 18 | 15    | 119     | 640   | 27351  | 142,45 | 100         |
| chr8 | 87623733  | 87623915  | CNGB3   | NM_019098 | 18 | 18 | 14    | 84      | 510   | 20846  | 113,91 | 100         |
| chr8 | 87638150  | 87638356  | CNGB3   | NM_019098 | 18 | 18 | 13    | 98      | 238   | 9397   | 45,4   | 100         |
| chr8 | 87641075  | 87641251  | CNGB3   | NM_019098 | 18 | 18 | 12    | 160     | 1158  | 50266  | 283,99 | 65,6        |
| chr8 | 87644896  | 87645075  | CNGB3   | NM_019098 | 18 | 18 | 11    | 142     | 66    | 2864   | 15,91  | 67,6        |
| chr8 | 87655969  | 87656154  | CNGB3   | NM_019098 | 18 | 18 | 10    | 123     | 1238  | 53548  | 287,89 | 100         |
| chr8 | 87656730  | 87656915  | CNGB3   | NM_019098 | 18 | 18 | 9     | 65      | 503   | 21961  | 118,07 | 100         |
| chr8 | 87660016  | 87660192  | CNGB3   | NM_019098 | 18 | 18 | 8     | 87      | 536   | 22001  | 124,3  | 100         |
| chr8 | 87666101  | 87666298  | CNGB3   | NM_019098 | 18 | 18 | 7     | 51      | 184   | 8042   | 40,62  | 100         |
| chr8 | 87679111  | 87679311  | CNGB3   | NM_019098 | 18 | 18 | 6     | 209     | 284   | 12953  | 64,44  | 76,1        |
| chr8 | 87680188  | 87680391  | CNGB3   | NM_019098 | 18 | 18 | 5     | 150     | 835   | 37330  | 182,99 | 96,7        |
| chr8 | 87683220  | 87683393  | CNGB3   | NM_019098 | 18 | 18 | 4     | 155     | 72    | 3104   | 17,84  | 69          |
| chr8 | 87738712  | 87738918  | CNGB3   | NM_019098 | 18 | 18 | 3     | 127     | 480   | 20981  | 101,36 | 100         |
| chr8 | 87751802  | 87751990  | CNGB3   | NM_019098 | 18 | 18 | 2     | 82      | 105   | 4526   | 23,95  | 100         |
| chr8 | 87755656  | 87755862  | CNGB3   | NM_019098 | 18 | 18 | 1     | 129     | 157   | 6779   | 32,75  | 100         |
| chr8 | 94767154  | 94767413  | TMEM67  | NM_153704 | 28 | 28 | 1     | 223     | 1302  | 61828  | 237,8  | 95,1        |
| chr8 | 94767942  | 94768127  | TMEM67  | NM_153704 | 28 | 28 | 2     | 89      | 84    | 3389   | 18,22  | 100         |
| chr8 | 94770676  | 94770846  | TMEM67  | NM_153704 | 28 | 28 | 3     | 94      | 328   | 13947  | 81,56  | 100         |
| chr8 | 94776076  | 94776282  | TMEM67  | NM_153704 | 28 | 28 | 4     | 100     | 287   | 12355  | 59,69  | 94          |
| chr8 | 94777631  | 94777914  | TMEM67  | NM_153704 | 28 | 28 | 5,6   | 70,75   | 543   | 24902  | 87,68  | 100,0,100,0 |
| chr8 | 94784702  | 94784884  | TMEM67  | NM_153704 | 28 | 28 | 7     | 63      | 243   | 10094  | 55,16  | 100         |
| chr8 | 94792795  | 94793223  | TMEM67  | NM_153704 | 28 | 28 | 8,9   | 155,109 | 890   | 37483  | 87,37  | 100,0,100,0 |
| chr8 | 94793858  | 94794043  | TMEM67  | NM_153704 | 28 | 28 | 10    | 87      | 178   | 7161   | 38,5   | 100         |
| chr8 | 94794528  | 94794710  | TMEM67  | NM_153704 | 28 | 28 | 11    | 66      | 64    | 2502   | 13,67  | 100         |
| chr8 | 94797502  | 94797672  | TMEM67  | NM_153704 | 28 | 28 | 12    | 157     | 120   | 4887   | 28,58  | 66,9        |
| chr8 | 94798418  | 94798597  | TMEM67  | NM_153704 | 28 | 28 | 13    | 124     | 181   | 7588   | 42,16  | 100         |
| chr8 | 94800054  | 94800242  | TMEM67  | NM_153704 | 28 | 28 | 14    | 106     | 837   | 38128  | 201,74 | 100         |
| chr8 | 94803463  | 94803693  | TMEM67  | NM_153704 | 28 | 28 | 15    | 57      | 167   | 7168   | 31,03  | 100         |
| chr8 | 94805377  | 94805562  | TMEM67  | NM_153704 | 28 | 28 | 16    | 99      | 437   | 19232  | 103,4  | 100         |
| chr8 | 94807591  | 94807776  | TMEM67  | NM_153704 | 28 | 28 | 17    | 99      | 266   | 11446  | 61,54  | 100         |
| chr8 | 94808083  | 94808271  | TMEM67  | NM_153704 | 28 | 28 | 18    | 87      | 349   | 15846  | 83,84  | 100         |
| chr8 | 94809319  | 94809670  | TMEM67  | NM_153704 | 28 | 28 | 19,20 | 100,140 | 507   | 24022  | 68,24  | 100,0,80,0  |
| chr8 | 94811830  | 94812006  | TMEM67  | NM_153704 | 28 | 28 | 21    | 141     | 589   | 23487  | 132,69 | 100         |
| chr8 | 94815828  | 94816034  | TMEM67  | NM_153704 | 28 | 28 | 22    | 81      | 184   | 7229   | 34,92  | 100         |
| chr8 | 94816992  | 94817168  | TMEM67  | NM_153704 | 28 | 28 | 23    | 117     | 135   | 5999   | 33,89  | 98,3        |
| chr8 | 94821033  | 94821387  | TMEM67  | NM_153704 | 28 | 28 | 24,25 | 117,105 | 682   | 32398  | 91,26  | 100,0,98,1  |
| chr8 | 94821971  | 94822168  | TMEM67  | NM_153704 | 28 | 28 | 26    | 103     | 47    | 1989   | 10,05  | 100         |
| chr8 | 94827536  | 94827721  | TMEM67  | NM_153704 | 28 | 28 | 27    | 143     | 163   | 6566   | 35,3   | 97,9        |
| chr8 | 94828611  | 94828814  | TMEM67  | NM_153704 | 28 | 28 | 28    | 81      | 42    | 1712   | 8,39   | 86,4        |
| chr8 | 96259769  | 96259978  | C8orf37 | NM_177965 | 6  | 6  | 6     | 154     | 444   | 18156  | 86,46  | 87          |
| chr8 | 96264288  | 96264509  | C8orf37 | NM_177965 | 6  | 6  | 5     | 96      | 328   | 12910  | 58,15  | 97,9        |
| chr8 | 96272006  | 96272200  | C8orf37 | NM_177965 | 6  | 6  | 4     | 66      | 490   | 21631  | 110,93 | 100         |
| chr8 | 96272558  | 96272752  | C8orf37 | NM_177965 | 6  | 6  | 3     | 65      | 430   | 18047  | 92,55  | 87,7        |
| chr8 | 96275825  | 96276022  | C8orf37 | NM_177965 | 6  | 6  | 2     | 88      | 127   | 5536   | 27,96  | 100         |
| chr8 | 96281319  | 96281489  | C8orf37 | NM_177965 | 6  | 6  | 1     | 155     | 147   | 5534   | 32,36  | 63,9        |
| chr9 | 2717659   | 2719071   | KCNV2   | NM_133497 | 2  | 2  | 2     | 1356    | 1193  | 55088  | 38,99  | 98,2        |
| chr9 | 2729503   | 2729795   | KCNV2   | NM_133497 | 2  | 2  | 2     | 282     | 666   | 28933  | 98,75  | 79,8        |
| chr9 | 32541289  | 32544357  | TOPORS  | NM_005802 | 3  | 3  | 3     | 2940    | 11192 | 544933 | 177,56 | 100         |
| chr9 | 32550750  | 32550944  | TOPORS  | NM_005802 | 3  | 3  | 2     | 195     | 34    | 1286   | 6,59   | 88,7        |
| chr9 | 102866763 | 102866984 | INVS    | NM_014425 | 17 | 16 | 2     | 106     | 480   | 21973  | 98,98  | 100         |
| chr9 | 102888677 | 102888892 | INVS    | NM_014425 | 17 | 16 | 3     | 167     | 835   | 34831  | 161,25 | 92,8        |
| chr9 | 102988321 | 102988545 | INVS    | NM_014425 | 17 | 16 | 4     | 174     | 160   | 6995   | 31,09  | 100         |

|       |           |           |        |           |    |    |     |         |      |        |        |            |
|-------|-----------|-----------|--------|-----------|----|----|-----|---------|------|--------|--------|------------|
| chr9  | 102991856 | 102992053 | INVS   | NM_014425 | 17 | 16 | 5   | 168     | 193  | 8104   | 40,93  | 66,7       |
| chr9  | 103002376 | 103002564 | INVS   | NM_014425 | 17 | 16 | 6   | 181     | 733  | 31415  | 166,22 | 81,2       |
| chr9  | 103004809 | 103005000 | INVS   | NM_014425 | 17 | 16 | 7   | 110     | 248  | 10448  | 54,42  | 100        |
| chr9  | 103008907 | 103009113 | INVS   | NM_014425 | 17 | 16 | 8   | 172     | 338  | 15687  | 75,78  | 94,8       |
| chr9  | 103014509 | 103014727 | INVS   | NM_014425 | 17 | 16 | 9   | 156     | 484  | 21746  | 99,3   | 100        |
| chr9  | 103015148 | 103015449 | INVS   | NM_014425 | 17 | 16 | 10  | 230     | 634  | 28202  | 93,38  | 100        |
| chr9  | 103027032 | 103027223 | INVS   | NM_014425 | 17 | 16 | 11  | 107     | 536  | 24074  | 125,39 | 100        |
| chr9  | 103035097 | 103035276 | INVS   | NM_014425 | 17 | 16 | 12  | 213     | 671  | 27226  | 151,26 | 61,5       |
| chr9  | 103046537 | 103046817 | INVS   | NM_014425 | 17 | 16 | 13  | 284     | 107  | 4881   | 17,37  | 76,1       |
| chr9  | 103054556 | 103055310 | INVS   | NM_014425 | 17 | 16 | 14  | 718     | 1309 | 61541  | 81,51  | 97,9       |
| chr9  | 103059233 | 103059510 | INVS   | NM_014425 | 17 | 16 | 15  | 230     | 851  | 36872  | 132,63 | 85,2       |
| chr9  | 103060141 | 103060430 | INVS   | NM_014425 | 17 | 16 | 16  | 75      | 276  | 12192  | 42,04  | 100        |
| chr9  | 103062850 | 103063109 | INVS   | NM_014425 | 17 | 16 | 17  | 107     | 1245 | 56171  | 216,04 | 100        |
| chr9  | 117164957 | 117165160 | DFNB31 | NM_015404 | 12 | 12 | 12  | 183     | 225  | 9005   | 44,14  | 69,4       |
| chr9  | 117165394 | 117165612 | DFNB31 | NM_015404 | 12 | 12 | 11  | 123     | 250  | 10815  | 49,38  | 94,3       |
| chr9  | 117166199 | 117166396 | DFNB31 | NM_015404 | 12 | 12 | 10  | 182     | 339  | 15480  | 78,18  | 87,4       |
| chr9  | 117168654 | 117169251 | DFNB31 | NM_015404 | 12 | 12 | 9   | 538     | 309  | 13986  | 23,39  | 96,5       |
| chr9  | 117170222 | 117170416 | DFNB31 | NM_015404 | 12 | 12 | 8   | 72      | 365  | 15784  | 80,94  | 100        |
| chr9  | 117185637 | 117185828 | DFNB31 | NM_015404 | 12 | 12 | 7   | 210     | 1487 | 59423  | 309,49 | 79,5       |
| chr9  | 117186679 | 117186879 | DFNB31 | NM_015404 | 12 | 12 | 6   | 213     | 118  | 5114   | 25,44  | 69,5       |
| chr9  | 117187174 | 117187531 | DFNB31 | NM_015404 | 12 | 12 | 5   | 37      | 849  | 38617  | 107,87 | 100        |
| chr9  | 117188380 | 117188657 | DFNB31 | NM_015404 | 12 | 12 | 4   | 203     | 353  | 15856  | 57,04  | 82,3       |
| chr9  | 117228449 | 117228637 | DFNB31 | NM_015404 | 12 | 12 | 3   | 126     | 143  | 6072   | 32,13  | 72,2       |
| chr9  | 117240546 | 117240989 | DFNB31 | NM_015404 | 12 | 12 | 2   | 219     | 663  | 31300  | 70,5   | 71,7       |
| chr9  | 117266366 | 117267224 | DFNB31 | NM_015404 | 12 | 12 | 1   | 618     | 1532 | 71555  | 83,3   | 100        |
| chr9  | 119459944 | 119462073 | TRIM32 | NM_012210 | 2  | 1  | 2   | 1962    | 4782 | 231500 | 108,69 | 100        |
| chr9  | 139324037 | 139324240 | INPP5E | NM_019892 | 10 | 10 | 10  | 133     | 731  | 32712  | 160,35 | 85,7       |
| chr9  | 139324720 | 139324911 | INPP5E | NM_019892 | 10 | 10 | 9   | 137     | 191  | 8755   | 45,6   | 100        |
| chr9  | 139325417 | 139325611 | INPP5E | NM_019892 | 10 | 10 | 8   | 116     | 414  | 18834  | 96,58  | 100        |
| chr9  | 139326301 | 139326495 | INPP5E | NM_019892 | 10 | 10 | 7   | 162     | 100  | 4201   | 21,54  | 84,6       |
| chr9  | 139326926 | 139327105 | INPP5E | NM_019892 | 10 | 10 | 6   | 108     | 25   | 969    | 5,38   | 100        |
| chr9  | 139327344 | 139327689 | INPP5E | NM_019892 | 10 | 10 | 5,4 | 120.125 | 303  | 13018  | 37,62  | 100.0,66.4 |
| chr9  | 139328485 | 139328700 | INPP5E | NM_019892 | 10 | 10 | 3   | 98      | 91   | 3911   | 18,11  | 100        |
| chr9  | 139329201 | 139329422 | INPP5E | NM_019892 | 10 | 10 | 2   | 124     | 32   | 1336   | 6,02   | 92,7       |
| chr9  | 139332991 | 139333970 | INPP5E | NM_019892 | 10 | 10 | 1   | 812     | 72   | 2810   | 2,87   | 100        |
| chr10 | 13320128  | 13320408  | PHYH   | NM_006214 | 9  | 9  | 9   | 54      | 565  | 25892  | 92,14  | 100        |
| chr10 | 13322963  | 13323187  | PHYH   | NM_006214 | 9  | 9  | 8   | 135     | 631  | 29091  | 129,29 | 100        |
| chr10 | 13325706  | 13325909  | PHYH   | NM_006214 | 9  | 9  | 7   | 150     | 406  | 17529  | 85,93  | 89,3       |
| chr10 | 13330275  | 13330502  | PHYH   | NM_006214 | 9  | 9  | 6   | 182     | 146  | 6126   | 26,87  | 78,6       |
| chr10 | 13333751  | 13333933  | PHYH   | NM_006214 | 9  | 9  | 5   | 82      | 114  | 4637   | 25,34  | 100        |
| chr10 | 13336441  | 13336653  | PHYH   | NM_006214 | 9  | 9  | 4   | 169     | 585  | 24164  | 113,45 | 92,3       |
| chr10 | 13337414  | 13337614  | PHYH   | NM_006214 | 9  | 9  | 3   | 111     | 148  | 6711   | 33,39  | 100        |
| chr10 | 13340097  | 13340273  | PHYH   | NM_006214 | 9  | 9  | 2   | 59      | 131  | 5805   | 32,8   | 100        |
| chr10 | 13341933  | 13342121  | PHYH   | NM_006214 | 9  | 9  | 1   | 75      | 3    | 108    | 0,57   | 100        |
| chr10 | 27486194  | 27486444  | ACBD5  | NM_145698 | 13 | 13 | 13  | 13      | 199  | 8443   | 33,64  | 100        |
| chr10 | 27493341  | 27493547  | ACBD5  | NM_145698 | 13 | 13 | 12  | 110     | 296  | 12888  | 62,26  | 100        |
| chr10 | 27494048  | 27494245  | ACBD5  | NM_145698 | 13 | 13 | 11  | 51      | 216  | 10220  | 51,62  | 100        |
| chr10 | 27497111  | 27497299  | ACBD5  | NM_145698 | 13 | 13 | 10  | 200     | 451  | 19140  | 101,27 | 62,5       |
| chr10 | 27499811  | 27500061  | ACBD5  | NM_145698 | 13 | 13 | 9   | 268     | 276  | 12372  | 49,29  | 74,6       |
| chr10 | 27504419  | 27504601  | ACBD5  | NM_145698 | 13 | 13 | 8   | 107     | 260  | 11399  | 62,29  | 100        |
| chr10 | 27506853  | 27507050  | ACBD5  | NM_145698 | 13 | 13 | 7   | 204     | 528  | 21499  | 108,58 | 69,6       |
| chr10 | 27508612  | 27508824  | ACBD5  | NM_145698 | 13 | 13 | 6   | 135     | 229  | 9724   | 45,65  | 100        |
| chr10 | 27512119  | 27512384  | ACBD5  | NM_145698 | 13 | 13 | 5   | 115     | 826  | 33393  | 125,54 | 100        |
| chr10 | 27520633  | 27520827  | ACBD5  | NM_145698 | 13 | 13 | 4   | 73      | 182  | 8508   | 43,63  | 100        |

|       |          |          |        |              |    |    |     |        |      |        |        |             |
|-------|----------|----------|--------|--------------|----|----|-----|--------|------|--------|--------|-------------|
| chr10 | 27524025 | 27524198 | ACBD5  | NM_145698    | 13 | 13 | 3   | 121    | 319  | 13117  | 75,39  | 96,7        |
| chr10 | 27529180 | 27529709 | ACBD5  | NM_145698    | 13 | 13 | 2,1 | 166,15 | 554  | 25934  | 48,93  | 100.0,100.0 |
| chr10 | 48381799 | 48382266 | RBP3   | NM_002900    | 4  | 4  | 4   | 356    | 289  | 13249  | 28,31  | 100         |
| chr10 | 48383742 | 48383939 | RBP3   | NM_002900    | 4  | 4  | 3   | 143    | 609  | 25473  | 128,65 | 67,1        |
| chr10 | 48385913 | 48386089 | RBP3   | NM_002900    | 4  | 4  | 2   | 191    | 269  | 10748  | 60,72  | 65,4        |
| chr10 | 48387796 | 48390962 | RBP3   | NM_002900    | 4  | 4  | 1   | 3054   | 4781 | 224577 | 70,91  | 100         |
| chr10 | 55568408 | 55569325 | PCDH15 | NM_001142769 | 36 | 35 | 36  | 855    | 4338 | 211923 | 230,85 | 100         |
| chr10 | 55570275 | 55570475 | PCDH15 | NM_001142769 | 36 | 35 | 35  | 111    | 849  | 38136  | 189,73 | 100         |
| chr10 | 55587203 | 55587379 | PCDH15 | NM_001142769 | 36 | 35 | 34  | 160    | 191  | 8015   | 45,28  | 66,2        |
| chr10 | 55588183 | 55588353 | PCDH15 | NM_001142769 | 36 | 35 | 33  | 9      | 411  | 16512  | 96,56  | 100         |
| chr10 | 55590859 | 55591302 | PCDH15 | NM_001142769 | 36 | 35 | 32  | 219    | 1106 | 51864  | 116,81 | 100         |
| chr10 | 55600064 | 55600279 | PCDH15 | NM_001142769 | 36 | 35 | 31  | 177    | 253  | 10936  | 50,63  | 100         |
| chr10 | 55616914 | 55617114 | PCDH15 | NM_001142769 | 36 | 35 | 30  | 89     | 655  | 29490  | 146,72 | 100         |
| chr10 | 55626312 | 55626589 | PCDH15 | NM_001142769 | 36 | 35 | 29  | 216    | 542  | 22850  | 82,19  | 87          |
| chr10 | 55662933 | 55663151 | PCDH15 | NM_001142769 | 36 | 35 | 28  | 128    | 674  | 30243  | 138,1  | 100         |
| chr10 | 55698520 | 55698723 | PCDH15 | NM_001142769 | 36 | 35 | 27  | 141    | 718  | 30327  | 148,66 | 100         |
| chr10 | 55700586 | 55700771 | PCDH15 | NM_001142769 | 36 | 35 | 26  | 110    | 468  | 21115  | 113,52 | 100         |
| chr10 | 55719435 | 55719638 | PCDH15 | NM_001142769 | 36 | 35 | 25  | 113    | 199  | 9005   | 44,14  | 100         |
| chr10 | 55721484 | 55721666 | PCDH15 | NM_001142769 | 36 | 35 | 24  | 141    | 281  | 12359  | 67,54  | 100         |
| chr10 | 55755243 | 55755615 | PCDH15 | NM_001142769 | 36 | 35 | 23  | 117    | 441  | 20176  | 54,09  | 100         |
| chr10 | 55779962 | 55780233 | PCDH15 | NM_001142769 | 36 | 35 | 22  | 225    | 958  | 44909  | 165,11 | 95,6        |
| chr10 | 55782570 | 55782924 | PCDH15 | NM_001142769 | 36 | 35 | 21  | 306    | 892  | 42289  | 119,12 | 89,2        |
| chr10 | 55826492 | 55826665 | PCDH15 | NM_001142769 | 36 | 35 | 20  | 129    | 281  | 12172  | 69,95  | 100         |
| chr10 | 55838995 | 55839219 | PCDH15 | NM_001142769 | 36 | 35 | 19  | 94     | 849  | 38591  | 171,52 | 100         |
| chr10 | 55849758 | 55849931 | PCDH15 | NM_001142769 | 36 | 35 | 18  | 80     | 384  | 16084  | 92,44  | 82,5        |
| chr10 | 55892630 | 55892833 | PCDH15 | NM_001142769 | 36 | 35 | 17  | 133    | 417  | 18844  | 92,37  | 100         |
| chr10 | 55912916 | 55913116 | PCDH15 | NM_001142769 | 36 | 35 | 16  | 194    | 2011 | 85622  | 425,98 | 71,1        |
| chr10 | 55943190 | 55943375 | PCDH15 | NM_001142769 | 36 | 35 | 15  | 150    | 867  | 37850  | 203,49 | 100         |
| chr10 | 55944854 | 55945066 | PCDH15 | NM_001142769 | 36 | 35 | 14  | 135    | 189  | 8220   | 38,59  | 100         |
| chr10 | 55949033 | 55949230 | PCDH15 | NM_001142769 | 36 | 35 | 13  | 21     | 160  | 7076   | 35,74  | 100         |
| chr10 | 55955409 | 55955606 | PCDH15 | NM_001142769 | 36 | 35 | 12  | 207    | 480  | 21378  | 107,97 | 79,2        |
| chr10 | 55973684 | 55973866 | PCDH15 | NM_001142769 | 36 | 35 | 11  | 113    | 262  | 10897  | 59,55  | 100         |
| chr10 | 55996536 | 55996736 | PCDH15 | NM_001142769 | 36 | 35 | 10  | 109    | 177  | 7579   | 37,71  | 100         |
| chr10 | 56076964 | 56077143 | PCDH15 | NM_001142769 | 36 | 35 | 9   | 171    | 259  | 10100  | 56,11  | 66,1        |
| chr10 | 56089235 | 56089465 | PCDH15 | NM_001142769 | 36 | 35 | 8   | 111    | 291  | 12836  | 55,57  | 99,1        |
| chr10 | 56106123 | 56106311 | PCDH15 | NM_001142769 | 36 | 35 | 7   | 120    | 343  | 14439  | 76,4   | 100         |
| chr10 | 56128854 | 56129066 | PCDH15 | NM_001142769 | 36 | 35 | 6   | 156    | 291  | 11315  | 53,12  | 100         |
| chr10 | 56138515 | 56138736 | PCDH15 | NM_001142769 | 36 | 35 | 5   | 161    | 299  | 13014  | 58,62  | 100         |
| chr10 | 56287519 | 56287698 | PCDH15 | NM_001142769 | 36 | 35 | 4   | 66     | 157  | 6576   | 36,53  | 100         |
| chr10 | 56288033 | 56288212 | PCDH15 | NM_001142769 | 36 | 35 | 3   | 15     | 308  | 12312  | 68,4   | 100         |
| chr10 | 56423859 | 56424065 | PCDH15 | NM_001142769 | 36 | 35 | 2   | 91     | 215  | 9469   | 45,74  | 100         |
| chr10 | 73156982 | 73157182 | CDH23  | NM_022124    | 68 | 67 | 1   | 385    | 4    | 166    | 0,83   | 24,4        |
| chr10 | 73199456 | 73199659 | CDH23  | NM_022124    | 68 | 67 | 2   | 67     | 688  | 27683  | 135,7  | 100         |
| chr10 | 73206012 | 73206215 | CDH23  | NM_022124    | 68 | 67 | 3   | 78     | 495  | 21613  | 105,95 | 100         |
| chr10 | 73269752 | 73269946 | CDH23  | NM_022124    | 68 | 67 | 4   | 143    | 689  | 30982  | 158,88 | 75,5        |
| chr10 | 73270691 | 73270971 | CDH23  | NM_022124    | 68 | 67 | 5,6 | 48,93  | 748  | 32881  | 117,01 | 100.0,100.0 |
| chr10 | 73326423 | 73326638 | CDH23  | NM_022124    | 68 | 67 | 7   | 195    | 390  | 17125  | 79,28  | 71,8        |
| chr10 | 73330438 | 73330659 | CDH23  | NM_022124    | 68 | 67 | 8   | 129    | 1126 | 47233  | 212,76 | 87,6        |
| chr10 | 73337543 | 73337761 | CDH23  | NM_022124    | 68 | 67 | 9   | 79     | 388  | 16578  | 75,7   | 100         |
| chr10 | 73375195 | 73375383 | CDH23  | NM_022124    | 68 | 67 | 10  | 113    | 343  | 16041  | 84,87  | 100         |
| chr10 | 73377015 | 73377310 | CDH23  | NM_022124    | 68 | 67 | 11  | 189    | 616  | 26178  | 88,44  | 72          |
| chr10 | 73405461 | 73405824 | CDH23  | NM_022124    | 68 | 67 | 12  | 156    | 1615 | 71187  | 195,57 | 100         |
| chr10 | 73406246 | 73406606 | CDH23  | NM_022124    | 68 | 67 | 13  | 159    | 938  | 43901  | 121,61 | 81,1        |
| chr10 | 73434776 | 73434958 | CDH23  | NM_022124    | 68 | 67 | 14  | 65     | 261  | 11599  | 63,38  | 100         |

|       |          |          |       |              |    |    |          |             |      |       |        |                  |
|-------|----------|----------|-------|--------------|----|----|----------|-------------|------|-------|--------|------------------|
| chr10 | 73437247 | 73437533 | CDH23 | NM_022124    | 68 | 67 | 15       | 238         | 171  | 7642  | 26,63  | 85,7             |
| chr10 | 73439080 | 73439253 | CDH23 | NM_022124    | 68 | 67 | 16       | 106         | 998  | 42456 | 244    | 100              |
| chr10 | 73442140 | 73442340 | CDH23 | NM_022124    | 68 | 67 | 17       | 128         | 808  | 35284 | 175,54 | 100              |
| chr10 | 73447294 | 73447488 | CDH23 | NM_022124    | 68 | 67 | 18       | 73          | 335  | 14493 | 74,32  | 100              |
| chr10 | 73450209 | 73450400 | CDH23 | NM_022124    | 68 | 67 | 19       | 117         | 425  | 19772 | 102,98 | 100              |
| chr10 | 73453790 | 73454002 | CDH23 | NM_022124    | 68 | 67 | 20       | 113         | 855  | 38217 | 179,42 | 87,6             |
| chr10 | 73455064 | 73455279 | CDH23 | NM_022124    | 68 | 67 | 21       | 108         | 662  | 28691 | 132,83 | 97,2             |
| chr10 | 73461778 | 73461972 | CDH23 | NM_022124    | 68 | 67 | 22       | 190         | 203  | 8972  | 46,01  | 100              |
| chr10 | 73462283 | 73462477 | CDH23 | NM_022124    | 68 | 67 | 23       | 146         | 770  | 34117 | 174,96 | 100              |
| chr10 | 73464570 | 73464859 | CDH23 | NM_022124    | 68 | 67 | 24       | 220         | 152  | 6330  | 21,83  | 87,3             |
| chr10 | 73466704 | 73467011 | CDH23 | NM_022124    | 68 | 67 | 25       | 153         | 308  | 12783 | 41,5   | 67,3             |
| chr10 | 73468858 | 73469064 | CDH23 | NM_022124    | 68 | 67 | 26       | 114         | 207  | 8965  | 43,31  | 97,4             |
| chr10 | 73472347 | 73472621 | CDH23 | NM_022124    | 68 | 67 | 27       | 149         | 479  | 22455 | 81,65  | 100              |
| chr10 | 73483680 | 73483856 | CDH23 | NM_022124    | 68 | 67 | 28       | 61          | 644  | 27672 | 156,34 | 90,2             |
| chr10 | 73485039 | 73485242 | CDH23 | NM_022124    | 68 | 67 | 29       | 149         | 341  | 13902 | 68,15  | 76,5             |
| chr10 | 73490222 | 73490410 | CDH23 | NM_022124    | 68 | 67 | 30       | 136         | 170  | 7464  | 39,49  | 100              |
| chr10 | 73491789 | 73492232 | CDH23 | NM_022124    | 68 | 67 | 31       | 389         | 1463 | 68769 | 154,89 | 88,4             |
| chr10 | 73493886 | 73494071 | CDH23 | NM_022124    | 68 | 67 | 32       | 102         | 230  | 9803  | 52,7   | 73,5             |
| chr10 | 73498167 | 73498370 | CDH23 | NM_022124    | 68 | 67 | 33       | 153         | 160  | 6893  | 33,79  | 77,8             |
| chr10 | 73499439 | 73499624 | CDH23 | NM_022124    | 68 | 67 | 34       | 129         | 344  | 14259 | 76,66  | 70,5             |
| chr10 | 73500506 | 73500706 | CDH23 | NM_022124    | 68 | 67 | 35       | 129         | 725  | 29626 | 147,39 | 99,2             |
| chr10 | 73501407 | 73501663 | CDH23 | NM_022124    | 68 | 67 | 36       | 228         | 541  | 22998 | 89,49  | 93,4             |
| chr10 | 73537361 | 73537671 | CDH23 | NM_022124    | 68 | 67 | 37       | 222         | 926  | 38748 | 124,59 | 100              |
| chr10 | 73537865 | 73538071 | CDH23 | NM_022124    | 68 | 67 | 38       | 120         | 824  | 35862 | 173,25 | 100              |
| chr10 | 73538944 | 73539147 | CDH23 | NM_022124    | 68 | 67 | 39       | 181         | 495  | 21234 | 104,09 | 68,5             |
| chr10 | 73543949 | 73544134 | CDH23 | NM_022124    | 68 | 67 | 40       | 134         | 361  | 16319 | 87,74  | 67,9             |
| chr10 | 73544624 | 73544818 | CDH23 | NM_022124    | 68 | 67 | 41       | 210         | 697  | 28523 | 146,27 | 81,4             |
| chr10 | 73545271 | 73545468 | CDH23 | NM_022124    | 68 | 67 | 42       | 108         | 613  | 24722 | 124,86 | 75               |
| chr10 | 73548623 | 73548808 | CDH23 | NM_022124    | 68 | 67 | 43       | 103         | 767  | 32308 | 173,7  | 100              |
| chr10 | 73550063 | 73550257 | CDH23 | NM_022124    | 68 | 67 | 44       | 126         | 200  | 8459  | 43,38  | 85,7             |
| chr10 | 73550913 | 73551104 | CDH23 | NM_022124    | 68 | 67 | 45       | 204         | 425  | 18200 | 94,79  | 88,2             |
| chr10 | 73552850 | 73553379 | CDH23 | NM_022124    | 68 | 67 | 46       | 459         | 1792 | 82664 | 155,97 | 96,1             |
| chr10 | 73556821 | 73557024 | CDH23 | NM_022124    | 68 | 67 | 47       | 117         | 648  | 27891 | 136,72 | 100              |
| chr10 | 73558067 | 73558377 | CDH23 | NM_022124    | 68 | 67 | 48       | 225         | 1124 | 52561 | 169,01 | 100              |
| chr10 | 73558791 | 73559006 | CDH23 | NM_022124    | 68 | 67 | 49       | 170         | 148  | 5830  | 26,99  | 81,8             |
| chr10 | 73559255 | 73559440 | CDH23 | NM_022124    | 68 | 67 | 50       | 138         | 265  | 10704 | 57,55  | 95,7             |
| chr10 | 73560282 | 73560506 | CDH23 | NM_022124    | 68 | 67 | 51       | 120         | 152  | 7161  | 31,83  | 95               |
| chr10 | 73562610 | 73563124 | CDH23 | NM_022124    | 68 | 67 | 52,53    | 178.212     | 1237 | 57735 | 112,11 | 100,0,75,0       |
| chr10 | 73565578 | 73566083 | CDH23 | NM_022124    | 68 | 67 | 54,55    | 192.114     | 722  | 33167 | 65,55  | 92,2,100,0       |
| chr10 | 73567090 | 73567841 | CDH23 | NM_022124    | 68 | 67 | 56,57,58 | 130.252.162 | 1786 | 83246 | 110,7  | 56,9,100,0,100,0 |
| chr10 | 73569561 | 73569844 | CDH23 | NM_022124    | 68 | 67 | 59       | 257         | 646  | 26807 | 94,39  | 100              |
| chr10 | 73570101 | 73570319 | CDH23 | NM_022124    | 68 | 67 | 60       | 98          | 506  | 21002 | 95,9   | 92,9             |
| chr10 | 73571010 | 73571435 | CDH23 | NM_022124    | 68 | 67 | 61,62    | 121,80      | 730  | 34624 | 81,28  | 100,0,100,0      |
| chr10 | 73571650 | 73571832 | CDH23 | NM_022124    | 68 | 67 | 64       | 61          | 678  | 31656 | 172,98 | 100              |
| chr10 | 73572035 | 73572647 | CDH23 | NM_022124    | 68 | 67 | 65,66    | 130.123     | 591  | 26792 | 43,71  | 100,0,100,0      |
| chr10 | 73572979 | 73573191 | CDH23 | NM_022124    | 68 | 67 | 67       | 105         | 333  | 14652 | 68,79  | 100              |
| chr10 | 73574740 | 73575165 | CDH23 | NM_022124    | 68 | 67 | 68       | 327         | 654  | 31651 | 74,3   | 90,5             |
| chr10 | 85954402 | 85954522 | CDHR1 | NM_001171971 | 17 | 17 | 1        | 55          | 0    | 0     | 0      | 10,9             |
| chr10 | 85955197 | 85955412 | CDHR1 | NM_001171971 | 17 | 17 | 2        | 96          | 216  | 9446  | 43,73  | 100              |
| chr10 | 85956164 | 85956382 | CDHR1 | NM_001171971 | 17 | 17 | 3        | 146         | 1736 | 76578 | 349,67 | 83,6             |
| chr10 | 85957478 | 85957654 | CDHR1 | NM_001171971 | 17 | 17 | 4        | 51          | 305  | 11992 | 67,75  | 100              |
| chr10 | 85958693 | 85958914 | CDHR1 | NM_001171971 | 17 | 17 | 5        | 90          | 369  | 17185 | 77,41  | 100              |
| chr10 | 85960224 | 85960439 | CDHR1 | NM_001171971 | 17 | 17 | 6        | 87          | 475  | 21136 | 97,85  | 95,4             |
| chr10 | 85961459 | 85961644 | CDHR1 | NM_001171971 | 17 | 17 | 7        | 114         | 580  | 23277 | 125,15 | 71,9             |

|       |           |           |       |              |    |    |       |             |      |        |        |                  |
|-------|-----------|-----------|-------|--------------|----|----|-------|-------------|------|--------|--------|------------------|
| chr10 | 85962662  | 85962871  | CDHR1 | NM_001171971 | 17 | 17 | 8     | 144         | 475  | 21484  | 102,3  | 94,4             |
| chr10 | 85964293  | 85964475  | CDHR1 | NM_001171971 | 17 | 17 | 9     | 79          | 611  | 26461  | 144,6  | 87,3             |
| chr10 | 85965565  | 85965768  | CDHR1 | NM_001171971 | 17 | 17 | 10    | 101         | 546  | 23629  | 115,83 | 100              |
| chr10 | 85967979  | 85968206  | CDHR1 | NM_001171971 | 17 | 17 | 11    | 204         | 516  | 22008  | 96,53  | 76               |
| chr10 | 85968415  | 85968639  | CDHR1 | NM_001171971 | 17 | 17 | 12    | 153         | 125  | 5287   | 23,5   | 100              |
| chr10 | 85970687  | 85970884  | CDHR1 | NM_001171971 | 17 | 17 | 13    | 165         | 1434 | 58137  | 293,62 | 77,6             |
| chr10 | 85971301  | 85971504  | CDHR1 | NM_001171971 | 17 | 17 | 14    | 68          | 254  | 9913   | 48,59  | 100              |
| chr10 | 85971977  | 85972260  | CDHR1 | NM_001171971 | 17 | 17 | 15    | 229         | 295  | 13989  | 49,26  | 81,7             |
| chr10 | 85972778  | 85973040  | CDHR1 | NM_001171971 | 17 | 17 | 16    | 258         | 1018 | 46168  | 175,54 | 75,2             |
| chr10 | 85978733  | 85979108  | CDHR1 | NM_001171971 | 17 | 17 | 17    | 198         | 515  | 23809  | 63,32  | 100              |
| chr10 | 86004695  | 86004898  | RGR   | NM_002921    | 7  | 7  | 1     | 79          | 131  | 5384   | 26,39  | 65,8             |
| chr10 | 86007278  | 86007460  | RGR   | NM_002921    | 7  | 7  | 2     | 157         | 530  | 23189  | 126,72 | 72,6             |
| chr10 | 86008557  | 86008766  | RGR   | NM_002921    | 7  | 7  | 3     | 134         | 97   | 3903   | 18,59  | 75,4             |
| chr10 | 86012514  | 86012720  | RGR   | NM_002921    | 7  | 7  | 4     | 154         | 1208 | 55389  | 267,58 | 70,1             |
| chr10 | 86014055  | 86014231  | RGR   | NM_002921    | 7  | 7  | 5     | 118         | 2264 | 102080 | 576,72 | 100              |
| chr10 | 86017668  | 86017877  | RGR   | NM_002921    | 7  | 7  | 6     | 114         | 930  | 37816  | 180,08 | 83,3             |
| chr10 | 86018212  | 86018489  | RGR   | NM_002921    | 7  | 7  | 7     | 132         | 489  | 21882  | 78,71  | 100              |
| chr10 | 95351686  | 95351892  | RBP4  | NM_006744    | 6  | 5  | 6     | 38          | 147  | 6627   | 32,01  | 100              |
| chr10 | 95353636  | 95353857  | RBP4  | NM_006744    | 6  | 5  | 5     | 213         | 415  | 16905  | 76,15  | 73,7             |
| chr10 | 95360078  | 95360767  | RBP4  | NM_006744    | 6  | 5  | 4,3,2 | 107.137.111 | 1500 | 71757  | 104    | 100.0,100.0,83.8 |
| chr10 | 95372364  | 95372964  | PDE6C | NM_006204    | 22 | 22 | 1     | 480         | 1195 | 56792  | 94,5   | 100              |
| chr10 | 95380427  | 95380763  | PDE6C | NM_006204    | 22 | 22 | 2,3   | 153,90      | 433  | 20291  | 60,21  | 75.2,100.0       |
| chr10 | 95381682  | 95381888  | PDE6C | NM_006204    | 22 | 22 | 4     | 141         | 840  | 34577  | 167,04 | 100              |
| chr10 | 95385274  | 95385465  | PDE6C | NM_006204    | 22 | 22 | 5     | 75          | 323  | 14092  | 73,4   | 100              |
| chr10 | 95386378  | 95386649  | PDE6C | NM_006204    | 22 | 22 | 6,7   | 65,67       | 367  | 16140  | 59,34  | 100.0,100.0      |
| chr10 | 95388908  | 95389093  | PDE6C | NM_006204    | 22 | 22 | 8     | 48          | 916  | 39824  | 214,11 | 100              |
| chr10 | 95394501  | 95394680  | PDE6C | NM_006204    | 22 | 22 | 9     | 150         | 165  | 7086   | 39,37  | 100              |
| chr10 | 95395255  | 95395458  | PDE6C | NM_006204    | 22 | 22 | 10    | 144         | 368  | 15344  | 75,22  | 99,3             |
| chr10 | 95396613  | 95396813  | PDE6C | NM_006204    | 22 | 22 | 11    | 69          | 226  | 9759   | 48,55  | 89,9             |
| chr10 | 95399850  | 95400062  | PDE6C | NM_006204    | 22 | 22 | 12    | 147         | 819  | 36374  | 170,77 | 84,4             |
| chr10 | 95400148  | 95400372  | PDE6C | NM_006204    | 22 | 22 | 13    | 108         | 394  | 17189  | 76,4   | 100              |
| chr10 | 95400661  | 95400855  | PDE6C | NM_006204    | 22 | 22 | 14    | 110         | 473  | 21938  | 112,5  | 100              |
| chr10 | 95405657  | 95405848  | PDE6C | NM_006204    | 22 | 22 | 15    | 88          | 280  | 11989  | 62,44  | 100              |
| chr10 | 95415487  | 95415690  | PDE6C | NM_006204    | 22 | 22 | 16    | 101         | 537  | 22935  | 112,43 | 100              |
| chr10 | 95418629  | 95418915  | PDE6C | NM_006204    | 22 | 22 | 17,18 | 108,64      | 387  | 17697  | 61,66  | 100.0,85.9       |
| chr10 | 95421704  | 95421883  | PDE6C | NM_006204    | 22 | 22 | 19    | 75          | 340  | 14134  | 78,52  | 90,7             |
| chr10 | 95422240  | 95422416  | PDE6C | NM_006204    | 22 | 22 | 20    | 84          | 177  | 8378   | 47,33  | 100              |
| chr10 | 95422759  | 95422956  | PDE6C | NM_006204    | 22 | 22 | 21    | 151         | 152  | 6143   | 31,03  | 100              |
| chr10 | 95425034  | 95425335  | PDE6C | NM_006204    | 22 | 22 | 22    | 59          | 219  | 9850   | 32,62  | 100              |
| chr10 | 102777779 | 102777982 | PDZD7 | NM_024895    | 10 | 9  | 9     | 198         | 466  | 20147  | 98,76  | 64,1             |
| chr10 | 102778493 | 102778939 | PDZD7 | NM_024895    | 10 | 9  | 8     | 396         | 121  | 5314   | 11,89  | 91,2             |
| chr10 | 102780352 | 102780564 | PDZD7 | NM_024895    | 10 | 9  | 7     | 61          | 53   | 1964   | 9,22   | 100              |
| chr10 | 102781459 | 102781674 | PDZD7 | NM_024895    | 10 | 9  | 6     | 148         | 990  | 42173  | 195,25 | 81,1             |
| chr10 | 102781926 | 102782108 | PDZD7 | NM_024895    | 10 | 9  | 5     | 177         | 874  | 38193  | 208,7  | 80,8             |
| chr10 | 102783107 | 102783319 | PDZD7 | NM_024895    | 10 | 9  | 4     | 175         | 124  | 5266   | 24,72  | 72,6             |
| chr10 | 102783729 | 102783914 | PDZD7 | NM_024895    | 10 | 9  | 3     | 141         | 1289 | 55779  | 299,89 | 68,8             |
| chr10 | 102789748 | 102790034 | PDZD7 | NM_024895    | 10 | 9  | 2     | 226         | 161  | 7067   | 24,62  | 100              |
| chr10 | 126086640 | 126086760 | OAT   | NM_000274    | 10 | 9  | 10    | 161         | 100  | 4049   | 33,46  | 19,9             |
| chr10 | 126089517 | 126089637 | OAT   | NM_000274    | 10 | 9  | 9     | 145         | 24   | 971    | 8,02   | 25,5             |
| chr10 | 126090376 | 126090496 | OAT   | NM_000274    | 10 | 9  | 8     | 114         | 13   | 502    | 4,15   | 28,9             |
| chr10 | 126091584 | 126091704 | OAT   | NM_000274    | 10 | 9  | 7     | 129         | 166  | 5736   | 47,4   | 31,8             |
| chr10 | 126092399 | 126092572 | OAT   | NM_000274    | 10 | 9  | 6     | 123         | 302  | 12981  | 74,6   | 74               |
| chr10 | 126093956 | 126094183 | OAT   | NM_000274    | 10 | 9  | 5     | 128         | 193  | 7925   | 34,76  | 100              |
| chr10 | 126097165 | 126097617 | OAT   | NM_000274    | 10 | 9  | 4,3   | 96.225      | 385  | 18540  | 40,93  | 43.8,100.0       |

|       |           |           |        |           |    |    |       |          |      |        |        |                  |
|-------|-----------|-----------|--------|-----------|----|----|-------|----------|------|--------|--------|------------------|
| chr10 | 126100472 | 126100672 | OAT    | NM_000274 | 10 | 9  | 2     | 199      | 297  | 11478  | 57,1   | 65,8             |
| chr11 | 12785719  | 12785937  | TEAD1  | NM_021961 | 13 | 11 | 3     | 202      | 505  | 19846  | 90,62  | 78,2             |
| chr11 | 12883713  | 12883892  | TEAD1  | NM_021961 | 13 | 11 | 4     | 65       | 116  | 5114   | 28,41  | 100              |
| chr11 | 12886387  | 12886590  | TEAD1  | NM_021961 | 13 | 11 | 5     | 63       | 201  | 8568   | 42     | 96,8             |
| chr11 | 12901135  | 12901338  | TEAD1  | NM_021961 | 13 | 11 | 6     | 135      | 148  | 5841   | 28,63  | 62,2             |
| chr11 | 12902423  | 12902611  | TEAD1  | NM_021961 | 13 | 11 | 7     | 47       | 290  | 12776  | 67,6   | 100              |
| chr11 | 12903409  | 12903618  | TEAD1  | NM_021961 | 13 | 11 | 8     | 62       | 758  | 32094  | 152,83 | 100              |
| chr11 | 12904524  | 12904751  | TEAD1  | NM_021961 | 13 | 11 | 9     | 125      | 803  | 36066  | 158,18 | 100              |
| chr11 | 12923476  | 12923670  | TEAD1  | NM_021961 | 13 | 11 | 10    | 174      | 756  | 33229  | 170,41 | 100              |
| chr11 | 12946422  | 12946634  | TEAD1  | NM_021961 | 13 | 11 | 11    | 141      | 463  | 20255  | 95,09  | 100              |
| chr11 | 12951648  | 12951821  | TEAD1  | NM_021961 | 13 | 11 | 12    | 153      | 385  | 14866  | 85,44  | 66               |
| chr11 | 12958686  | 12958883  | TEAD1  | NM_021961 | 13 | 11 | 13    | 114      | 679  | 25297  | 127,76 | 73,7             |
| chr11 | 17518160  | 17518360  | USH1C  | NM_005709 | 21 | 21 | 20    | 56       | 196  | 8334   | 41,46  | 100              |
| chr11 | 17519693  | 17519878  | USH1C  | NM_005709 | 21 | 21 | 19    | 110      | 995  | 43246  | 232,51 | 100              |
| chr11 | 17522619  | 17522804  | USH1C  | NM_005709 | 21 | 21 | 18    | 100      | 140  | 5705   | 30,67  | 79               |
| chr11 | 17522994  | 17523170  | USH1C  | NM_005709 | 21 | 21 | 17    | 54       | 154  | 6521   | 36,84  | 100              |
| chr11 | 17523406  | 17523594  | USH1C  | NM_005709 | 21 | 21 | 16    | 42       | 357  | 14581  | 77,15  | 100              |
| chr11 | 17538944  | 17539129  | USH1C  | NM_005709 | 21 | 21 | 15    | 74       | 157  | 7268   | 39,08  | 100              |
| chr11 | 17542369  | 17542578  | USH1C  | NM_005709 | 21 | 21 | 14    | 125      | 2216 | 97561  | 464,58 | 100              |
| chr11 | 17542894  | 17543076  | USH1C  | NM_005709 | 21 | 21 | 13    | 66       | 483  | 21111  | 115,36 | 98,5             |
| chr11 | 17544257  | 17544427  | USH1C  | NM_005709 | 21 | 21 | 12    | 143      | 350  | 14653  | 85,69  | 67,8             |
| chr11 | 17544796  | 17545076  | USH1C  | NM_005709 | 21 | 21 | 11,10 | 57,60    | 431  | 17407  | 61,95  | 33.3,100.0       |
| chr11 | 17546002  | 17546196  | USH1C  | NM_005709 | 21 | 21 | 9     | 85       | 494  | 21524  | 110,38 | 95,3             |
| chr11 | 17547912  | 17548109  | USH1C  | NM_005709 | 21 | 21 | 8     | 95       | 886  | 39412  | 199,05 | 81,1             |
| chr11 | 17548243  | 17548416  | USH1C  | NM_005709 | 21 | 21 | 7     | 58       | 438  | 18938  | 108,84 | 100              |
| chr11 | 17548695  | 17548954  | USH1C  | NM_005709 | 21 | 21 | 5     | 109      | 353  | 16959  | 65,23  | 100              |
| chr11 | 17552734  | 17553159  | USH1C  | NM_005709 | 21 | 21 | 4,3   | 139.144  | 199  | 8784   | 20,62  | 76.3,100.0       |
| chr11 | 17554743  | 17554993  | USH1C  | NM_005709 | 21 | 21 | 2     | 68       | 156  | 6998   | 27,88  | 100              |
| chr11 | 17565726  | 17565929  | USH1C  | NM_005709 | 21 | 21 | 1     | 36       | 173  | 7030   | 34,46  | 100              |
| chr11 | 46722449  | 46722634  | ZNF408 | NM_024741 | 5  | 5  | 1     | 52       | 210  | 8524   | 45,83  | 71,2             |
| chr11 | 46722995  | 46723302  | ZNF408 | NM_024741 | 5  | 5  | 2     | 278      | 92   | 3752   | 12,18  | 83,5             |
| chr11 | 46724121  | 46724336  | ZNF408 | NM_024741 | 5  | 5  | 3     | 62       | 1032 | 45009  | 208,38 | 100              |
| chr11 | 46724598  | 46724878  | ZNF408 | NM_024741 | 5  | 5  | 4     | 260      | 160  | 6077   | 21,63  | 75,4             |
| chr11 | 46725886  | 46727464  | ZNF408 | NM_024741 | 5  | 5  | 5     | 1511     | 2195 | 104010 | 65,87  | 100              |
| chr11 | 61719309  | 61719482  | BEST1  | NM_004183 | 11 | 10 | 2     | 152      | 201  | 8397   | 48,26  | 80,3             |
| chr11 | 61722540  | 61722710  | BEST1  | NM_004183 | 11 | 10 | 3     | 95       | 426  | 16981  | 99,3   | 100              |
| chr11 | 61723178  | 61723443  | BEST1  | NM_004183 | 11 | 10 | 4     | 234      | 50   | 2041   | 7,67   | 100              |
| chr11 | 61724295  | 61724486  | BEST1  | NM_004183 | 11 | 10 | 5     | 155      | 365  | 15928  | 82,96  | 100              |
| chr11 | 61724812  | 61724985  | BEST1  | NM_004183 | 11 | 10 | 6     | 78       | 398  | 16984  | 97,61  | 100              |
| chr11 | 61725559  | 61725901  | BEST1  | NM_004183 | 11 | 10 | 7     | 153      | 786  | 37890  | 110,47 | 100              |
| chr11 | 61726897  | 61727476  | BEST1  | NM_004183 | 11 | 10 | 8,9   | 81.152   | 1350 | 64248  | 110,77 | 100.0,74.3       |
| chr11 | 61729756  | 61730744  | BEST1  | NM_004183 | 11 | 10 | 10    | 639      | 4272 | 205983 | 208,27 | 95,5             |
| chr11 | 61731448  | 61731781  | BEST1  | NM_004183 | 11 | 10 | 11    | 19       | 1088 | 50324  | 150,67 | 100              |
| chr11 | 62380656  | 62381428  | ROM1   | NM_000327 | 3  | 3  | 1     | 590      | 980  | 43428  | 56,18  | 100              |
| chr11 | 62381624  | 62382411  | ROM1   | NM_000327 | 3  | 3  | 2,3   | 247.219  | 2829 | 134200 | 170,3  | 100.0,100.0      |
| chr11 | 66278115  | 66278324  | BBS1   | NM_024649 | 17 | 17 | 1     | 47       | 562  | 20477  | 97,51  | 100              |
| chr11 | 66278367  | 66278804  | BBS1   | NM_024649 | 17 | 17 | 2,3   | 77,35    | 3762 | 174904 | 399,32 | 100.0,100.0      |
| chr11 | 66281944  | 66282197  | BBS1   | NM_024649 | 17 | 17 | 4     | 273      | 1313 | 60446  | 237,98 | 75,5             |
| chr11 | 66283014  | 66283451  | BBS1   | NM_024649 | 17 | 17 | 5,6,7 | 47,39,73 | 891  | 37436  | 85,47  | 93.6,100.0,100.0 |
| chr11 | 66287101  | 66287328  | BBS1   | NM_024649 | 17 | 17 | 8     | 132      | 488  | 20317  | 89,11  | 90,2             |
| chr11 | 66288726  | 66288935  | BBS1   | NM_024649 | 17 | 17 | 9     | 107      | 379  | 14955  | 71,21  | 100              |
| chr11 | 66290844  | 66291314  | BBS1   | NM_024649 | 17 | 17 | 10,11 | 121.159  | 1956 | 86301  | 183,23 | 100.0,75.5       |
| chr11 | 66293453  | 66293659  | BBS1   | NM_024649 | 17 | 17 | 12    | 70       | 661  | 29546  | 142,73 | 94,3             |
| chr11 | 66294042  | 66294417  | BBS1   | NM_024649 | 17 | 17 | 13    | 159      | 1483 | 65250  | 173,54 | 100              |

|       |          |          |       |           |    |    |       |         |      |        |        |            |
|-------|----------|----------|-------|-----------|----|----|-------|---------|------|--------|--------|------------|
| chr11 | 66297313 | 66297528 | BBS1  | NM_024649 | 17 | 17 | 14    | 134     | 73   | 3074   | 14,23  | 82,8       |
| chr11 | 66298340 | 66298528 | BBS1  | NM_024649 | 17 | 17 | 15    | 135     | 1348 | 51560  | 272,8  | 100        |
| chr11 | 66299176 | 66299631 | BBS1  | NM_024649 | 17 | 17 | 16,17 | 87,87   | 158  | 6744   | 14,79  | 43.7,100.0 |
| chr11 | 67222927 | 67223287 | CABP4 | NM_145200 | 6  | 6  | 1     | 366     | 138  | 6245   | 17,3   | 91,3       |
| chr11 | 67223521 | 67223881 | CABP4 | NM_145200 | 6  | 6  | 2,3   | 31.144  | 384  | 16925  | 46,88  | 100.0,77.8 |
| chr11 | 67224977 | 67225171 | CABP4 | NM_145200 | 6  | 6  | 4     | 110     | 180  | 7985   | 40,95  | 100        |
| chr11 | 67225890 | 67226155 | CABP4 | NM_145200 | 6  | 6  | 5,6   | 148,29  | 509  | 23516  | 88,41  | 67.6,100.0 |
| chr11 | 68080041 | 68080229 | LRP5  | NM_002335 | 23 | 23 | 1     | 91      | 0    | 0      | 0      | 51,6       |
| chr11 | 68115367 | 68115807 | LRP5  | NM_002335 | 23 | 23 | 2     | 397     | 527  | 24815  | 56,27  | 86,9       |
| chr11 | 68125041 | 68125241 | LRP5  | NM_002335 | 23 | 23 | 3     | 198     | 289  | 12622  | 62,8   | 62,6       |
| chr11 | 68131248 | 68131427 | LRP5  | NM_002335 | 23 | 23 | 4     | 197     | 396  | 18522  | 102,9  | 83,2       |
| chr11 | 68133061 | 68133267 | LRP5  | NM_002335 | 23 | 23 | 5     | 132     | 53   | 2318   | 11,2   | 83,3       |
| chr11 | 68153806 | 68154237 | LRP5  | NM_002335 | 23 | 23 | 6     | 397     | 285  | 12681  | 29,35  | 94,5       |
| chr11 | 68157397 | 68157609 | LRP5  | NM_002335 | 23 | 23 | 7     | 172     | 80   | 3343   | 15,69  | 72,1       |
| chr11 | 68170867 | 68171123 | LRP5  | NM_002335 | 23 | 23 | 8     | 217     | 247  | 10963  | 42,66  | 79,7       |
| chr11 | 68173936 | 68174204 | LRP5  | NM_002335 | 23 | 23 | 9     | 290     | 207  | 8608   | 32     | 73,4       |
| chr11 | 68177315 | 68177616 | LRP5  | NM_002335 | 23 | 23 | 10    | 227     | 556  | 25793  | 85,41  | 100        |
| chr11 | 68178904 | 68179086 | LRP5  | NM_002335 | 23 | 23 | 11    | 185     | 77   | 3252   | 17,77  | 98,9       |
| chr11 | 68181141 | 68181486 | LRP5  | NM_002335 | 23 | 23 | 12    | 324     | 590  | 27182  | 78,56  | 100        |
| chr11 | 68183726 | 68183944 | LRP5  | NM_002335 | 23 | 23 | 13    | 200     | 1432 | 58785  | 268,42 | 74,5       |
| chr11 | 68190912 | 68191085 | LRP5  | NM_002335 | 23 | 23 | 14    | 209     | 271  | 12118  | 69,64  | 61,7       |
| chr11 | 68192639 | 68192824 | LRP5  | NM_002335 | 23 | 23 | 15    | 191     | 132  | 5788   | 31,12  | 63,9       |
| chr11 | 68193450 | 68193659 | LRP5  | NM_002335 | 23 | 23 | 16    | 210     | 304  | 13847  | 65,94  | 98,1       |
| chr11 | 68196948 | 68197130 | LRP5  | NM_002335 | 23 | 23 | 17    | 126     | 400  | 17644  | 96,42  | 69,8       |
| chr11 | 68200978 | 68201261 | LRP5  | NM_002335 | 23 | 23 | 18    | 237     | 112  | 4967   | 17,49  | 81         |
| chr11 | 68204242 | 68204448 | LRP5  | NM_002335 | 23 | 23 | 19    | 111     | 365  | 14086  | 68,05  | 82,9       |
| chr11 | 68205897 | 68206183 | LRP5  | NM_002335 | 23 | 23 | 20    | 237     | 227  | 8540   | 29,76  | 100        |
| chr11 | 68207154 | 68207366 | LRP5  | NM_002335 | 23 | 23 | 21    | 140     | 84   | 3553   | 16,68  | 87,1       |
| chr11 | 68213858 | 68214058 | LRP5  | NM_002335 | 23 | 23 | 22    | 98      | 351  | 15193  | 75,59  | 100        |
| chr11 | 68216323 | 68216653 | LRP5  | NM_002335 | 23 | 23 | 23    | 262     | 400  | 18251  | 55,14  | 82,4       |
| chr11 | 76795862 | 76796056 | CAPN5 | NM_004055 | 13 | 12 | 2     | 165     | 860  | 38939  | 199,69 | 75,2       |
| chr11 | 76804750 | 76804968 | CAPN5 | NM_004055 | 13 | 12 | 3     | 132     | 125  | 5498   | 25,11  | 83,3       |
| chr11 | 76823671 | 76823859 | CAPN5 | NM_004055 | 13 | 12 | 4     | 209     | 249  | 9659   | 51,11  | 82,8       |
| chr11 | 76825253 | 76825441 | CAPN5 | NM_004055 | 13 | 12 | 5     | 193     | 469  | 21117  | 111,73 | 79,8       |
| chr11 | 76826395 | 76826604 | CAPN5 | NM_004055 | 13 | 12 | 6     | 194     | 349  | 14754  | 70,26  | 84,5       |
| chr11 | 76827195 | 76827365 | CAPN5 | NM_004055 | 13 | 12 | 7     | 78      | 55   | 2338   | 13,67  | 100        |
| chr11 | 76829146 | 76829346 | CAPN5 | NM_004055 | 13 | 12 | 8     | 196     | 164  | 7135   | 35,5   | 73,5       |
| chr11 | 76830018 | 76830197 | CAPN5 | NM_004055 | 13 | 12 | 9     | 123     | 262  | 10636  | 59,09  | 99,2       |
| chr11 | 76831816 | 76832004 | CAPN5 | NM_004055 | 13 | 12 | 10    | 197     | 829  | 36099  | 191    | 71,1       |
| chr11 | 76832862 | 76833092 | CAPN5 | NM_004055 | 13 | 12 | 11    | 116     | 1217 | 56382  | 244,08 | 97,4       |
| chr11 | 76833544 | 76833738 | CAPN5 | NM_004055 | 13 | 12 | 12    | 137     | 358  | 15029  | 77,07  | 85,4       |
| chr11 | 76834754 | 76834972 | CAPN5 | NM_004055 | 13 | 12 | 13    | 183     | 487  | 21357  | 97,52  | 89,1       |
| chr11 | 76841599 | 76841805 | MYO7A | NM_000260 | 49 | 48 | 2     | 18      | 1077 | 45083  | 217,79 | 100        |
| chr11 | 76853518 | 76853801 | MYO7A | NM_000260 | 49 | 48 | 3     | 114     | 361  | 16942  | 59,65  | 41,2       |
| chr11 | 76858822 | 76859004 | MYO7A | NM_000260 | 49 | 48 | 4     | 153     | 173  | 7697   | 42,06  | 100        |
| chr11 | 76866992 | 76867195 | MYO7A | NM_000260 | 49 | 48 | 5     | 185     | 292  | 12815  | 62,82  | 78,9       |
| chr11 | 76867709 | 76868042 | MYO7A | NM_000260 | 49 | 48 | 6,7   | 122.143 | 518  | 23891  | 71,53  | 97.5,94.4  |
| chr11 | 76868221 | 76868433 | MYO7A | NM_000260 | 49 | 48 | 8     | 114     | 286  | 12531  | 58,83  | 95,6       |
| chr11 | 76869308 | 76869484 | MYO7A | NM_000260 | 49 | 48 | 9     | 154     | 196  | 7776   | 43,93  | 100        |
| chr11 | 76870487 | 76870705 | MYO7A | NM_000260 | 49 | 48 | 10    | 77      | 518  | 24132  | 110,19 | 100        |
| chr11 | 76871219 | 76871428 | MYO7A | NM_000260 | 49 | 48 | 11    | 120     | 69   | 2952   | 14,06  | 91,7       |
| chr11 | 76872040 | 76872249 | MYO7A | NM_000260 | 49 | 48 | 12    | 143     | 756  | 32220  | 153,43 | 85,3       |
| chr11 | 76873206 | 76873385 | MYO7A | NM_000260 | 49 | 48 | 13    | 211     | 164  | 6234   | 34,63  | 81         |
| chr11 | 76873917 | 76874138 | MYO7A | NM_000260 | 49 | 48 | 14    | 136     | 2128 | 100134 | 451,05 | 86,8       |

|       |           |           |          |              |    |    |       |         |      |        |        |            |
|-------|-----------|-----------|----------|--------------|----|----|-------|---------|------|--------|--------|------------|
| chr11 | 76876985  | 76877191  | MYO7A    | NM_000260    | 49 | 48 | 15    | 107     | 183  | 7665   | 37,03  | 84,1       |
| chr11 | 76883819  | 76884031  | MYO7A    | NM_000260    | 49 | 48 | 16    | 138     | 81   | 3656   | 17,16  | 81,9       |
| chr11 | 76885837  | 76886037  | MYO7A    | NM_000260    | 49 | 48 | 17    | 159     | 153  | 6344   | 31,56  | 78         |
| chr11 | 76886393  | 76886587  | MYO7A    | NM_000260    | 49 | 48 | 18    | 93      | 478  | 20883  | 107,09 | 100        |
| chr11 | 76888601  | 76888813  | MYO7A    | NM_000260    | 49 | 48 | 19    | 95      | 710  | 28753  | 134,99 | 93,7       |
| chr11 | 76890047  | 76890217  | MYO7A    | NM_000260    | 49 | 48 | 20    | 85      | 352  | 15022  | 87,85  | 100        |
| chr11 | 76890723  | 76890944  | MYO7A    | NM_000260    | 49 | 48 | 21    | 219     | 47   | 1884   | 8,49   | 74,9       |
| chr11 | 76891304  | 76891498  | MYO7A    | NM_000260    | 49 | 48 | 22    | 108     | 212  | 8007   | 41,06  | 73,1       |
| chr11 | 76892457  | 76892651  | MYO7A    | NM_000260    | 49 | 48 | 23    | 210     | 227  | 9361   | 48,01  | 85,2       |
| chr11 | 76892983  | 76893204  | MYO7A    | NM_000260    | 49 | 48 | 24    | 204     | 230  | 9471   | 42,66  | 100        |
| chr11 | 76893492  | 76893674  | MYO7A    | NM_000260    | 49 | 48 | 25    | 177     | 218  | 8389   | 45,84  | 87         |
| chr11 | 76894064  | 76894252  | MYO7A    | NM_000260    | 49 | 48 | 26    | 90      | 59   | 2528   | 13,38  | 100        |
| chr11 | 76895595  | 76895946  | MYO7A    | NM_000260    | 49 | 48 | 27    | 128     | 761  | 32746  | 93,03  | 100        |
| chr11 | 76900405  | 76900617  | MYO7A    | NM_000260    | 49 | 48 | 28    | 127     | 138  | 5764   | 27,06  | 87,4       |
| chr11 | 76901099  | 76901299  | MYO7A    | NM_000260    | 49 | 48 | 29    | 120     | 173  | 6596   | 32,82  | 71,7       |
| chr11 | 76901662  | 76901868  | MYO7A    | NM_000260    | 49 | 48 | 30    | 174     | 380  | 15308  | 73,95  | 73         |
| chr11 | 76903117  | 76903415  | MYO7A    | NM_000260    | 49 | 48 | 31    | 228     | 208  | 9469   | 31,67  | 90,8       |
| chr11 | 76905428  | 76905649  | MYO7A    | NM_000260    | 49 | 48 | 32    | 171     | 144  | 6185   | 27,86  | 83         |
| chr11 | 76908433  | 76908624  | MYO7A    | NM_000260    | 49 | 48 | 33    | 118     | 356  | 15434  | 80,39  | 83,9       |
| chr11 | 76909427  | 76909648  | MYO7A    | NM_000260    | 49 | 48 | 34    | 127     | 164  | 6595   | 29,71  | 85,8       |
| chr11 | 76910650  | 76910918  | MYO7A    | NM_000260    | 49 | 48 | 35    | 284     | 440  | 20349  | 75,65  | 75,4       |
| chr11 | 76912421  | 76912618  | MYO7A    | NM_000260    | 49 | 48 | 36    | 191     | 478  | 20097  | 101,5  | 66         |
| chr11 | 76913354  | 76913560  | MYO7A    | NM_000260    | 49 | 48 | 37    | 125     | 330  | 14416  | 69,64  | 92,8       |
| chr11 | 76914113  | 76914304  | MYO7A    | NM_000260    | 49 | 48 | 38    | 158     | 23   | 1010   | 5,26   | 94,9       |
| chr11 | 76915075  | 76915272  | MYO7A    | NM_000260    | 49 | 48 | 39    | 154     | 319  | 13662  | 69     | 98,7       |
| chr11 | 76916496  | 76916672  | MYO7A    | NM_000260    | 49 | 48 | 40    | 156     | 90   | 3818   | 21,57  | 100        |
| chr11 | 76917127  | 76917327  | MYO7A    | NM_000260    | 49 | 48 | 41    | 106     | 237  | 10645  | 52,96  | 100        |
| chr11 | 76918326  | 76918520  | MYO7A    | NM_000260    | 49 | 48 | 42    | 114     | 232  | 10267  | 52,65  | 100        |
| chr11 | 76919424  | 76919784  | MYO7A    | NM_000260    | 49 | 48 | 43,44 | 88,107  | 177  | 7396   | 20,49  | 100,0,40,2 |
| chr11 | 76922183  | 76922386  | MYO7A    | NM_000260    | 49 | 48 | 45    | 186     | 264  | 10410  | 51,03  | 100        |
| chr11 | 76922862  | 76923044  | MYO7A    | NM_000260    | 49 | 48 | 46    | 117     | 148  | 6260   | 34,21  | 100        |
| chr11 | 76923923  | 76924102  | MYO7A    | NM_000260    | 49 | 48 | 47    | 84      | 565  | 24768  | 137,6  | 100        |
| chr11 | 76924933  | 76925115  | MYO7A    | NM_000260    | 49 | 48 | 48    | 120     | 680  | 27618  | 150,92 | 76,7       |
| chr11 | 76925627  | 76925833  | MYO7A    | NM_000260    | 49 | 48 | 49    | 90      | 126  | 5776   | 27,9   | 100        |
| chr11 | 85361275  | 85361484  | TMEM126A | NM_032273    | 5  | 4  | 2     | 86      | 127  | 5483   | 26,11  | 100        |
| chr11 | 85365087  | 85365296  | TMEM126A | NM_032273    | 5  | 4  | 3     | 194     | 475  | 20257  | 96,46  | 97,9       |
| chr11 | 85366591  | 85366788  | TMEM126A | NM_032273    | 5  | 4  | 4     | 115     | 124  | 5081   | 25,66  | 100        |
| chr11 | 85367397  | 85367585  | TMEM126A | NM_032273    | 5  | 4  | 5     | 193     | 37   | 1609   | 8,51   | 77,2       |
| chr11 | 86662077  | 86663563  | FZD4     | NM_012193    | 2  | 2  | 2     | 1329    | 6630 | 320144 | 215,3  | 100        |
| chr11 | 86665821  | 86666243  | FZD4     | NM_012193    | 2  | 2  | 1     | 285     | 242  | 10370  | 24,52  | 100        |
| chr11 | 117209308 | 117209481 | CEP164   | NM_001271933 | 32 | 31 | 2     | 82      | 972  | 41088  | 236,14 | 93,9       |
| chr11 | 117214912 | 117215100 | CEP164   | NM_001271933 | 32 | 31 | 3     | 112     | 102  | 4362   | 23,08  | 73,2       |
| chr11 | 117222429 | 117222656 | CEP164   | NM_001271933 | 32 | 31 | 4     | 199     | 296  | 13026  | 57,13  | 75,9       |
| chr11 | 117232604 | 117232801 | CEP164   | NM_001271933 | 32 | 31 | 5     | 159     | 664  | 27235  | 137,55 | 66,7       |
| chr11 | 117233146 | 117233349 | CEP164   | NM_001271933 | 32 | 31 | 6     | 135     | 50   | 2223   | 10,9   | 80,7       |
| chr11 | 117234104 | 117234328 | CEP164   | NM_001271933 | 32 | 31 | 7     | 78      | 570  | 24871  | 110,54 | 100        |
| chr11 | 117241732 | 117242172 | CEP164   | NM_001271933 | 32 | 31 | 8     | 387     | 675  | 32136  | 72,87  | 97,4       |
| chr11 | 117244475 | 117244672 | CEP164   | NM_001271933 | 32 | 31 | 9     | 81      | 639  | 28036  | 141,6  | 90,1       |
| chr11 | 117246290 | 117246499 | CEP164   | NM_001271933 | 32 | 31 | 10    | 84      | 540  | 24325  | 115,83 | 90,5       |
| chr11 | 117251209 | 117251403 | CEP164   | NM_001271933 | 32 | 31 | 11    | 101     | 341  | 13742  | 70,47  | 73,3       |
| chr11 | 117252472 | 117252672 | CEP164   | NM_001271933 | 32 | 31 | 12    | 168     | 98   | 3722   | 18,52  | 67,3       |
| chr11 | 117253409 | 117253609 | CEP164   | NM_001271933 | 32 | 31 | 13    | 147     | 854  | 36997  | 184,06 | 66,7       |
| chr11 | 117257803 | 117258086 | CEP164   | NM_001271933 | 32 | 31 | 14    | 210     | 391  | 17884  | 62,97  | 80         |
| chr11 | 117261416 | 117261859 | CEP164   | NM_001271933 | 32 | 31 | 15,16 | 132,217 | 423  | 19532  | 43,99  | 100,0,66,8 |



|       |           |           |          |              |    |    |           |                     |      |        |        |                              |
|-------|-----------|-----------|----------|--------------|----|----|-----------|---------------------|------|--------|--------|------------------------------|
| chr11 | 117262949 | 117263140 | CEP164   | NM_001271933 | 32 | 31 | 17        | 78                  | 321  | 12223  | 63,66  | 91                           |
| chr11 | 117263204 | 117263407 | CEP164   | NM_001271933 | 32 | 31 | 18        | 132                 | 441  | 18346  | 89,93  | 100                          |
| chr11 | 117263680 | 117263865 | CEP164   | NM_001271933 | 32 | 31 | 19        | 123                 | 144  | 6489   | 34,89  | 100                          |
| chr11 | 117264965 | 117265186 | CEP164   | NM_001271933 | 32 | 31 | 20        | 144                 | 37   | 1441   | 6,49   | 84                           |
| chr11 | 117265580 | 117265845 | CEP164   | NM_001271933 | 32 | 31 | 21,22     | 84,69               | 321  | 15005  | 56,41  | 100.0,10.1                   |
| chr11 | 117266238 | 117266438 | CEP164   | NM_001271933 | 32 | 31 | 23        | 176                 | 269  | 10980  | 54,63  | 100                          |
| chr11 | 117266747 | 117266917 | CEP164   | NM_001271933 | 32 | 31 | 24        | 127                 | 254  | 10635  | 62,19  | 100                          |
| chr11 | 117267202 | 117267396 | CEP164   | NM_001271933 | 32 | 31 | 25        | 62                  | 1069 | 48227  | 247,32 | 100                          |
| chr11 | 117267762 | 117268042 | CEP164   | NM_001271933 | 32 | 31 | 26        | 223                 | 159  | 7009   | 24,94  | 100                          |
| chr11 | 117278522 | 117278725 | CEP164   | NM_001271933 | 32 | 31 | 27        | 108                 | 143  | 5947   | 29,15  | 78,7                         |
| chr11 | 117279499 | 117279708 | CEP164   | NM_001271933 | 32 | 31 | 28        | 115                 | 145  | 6320   | 30,1   | 89,6                         |
| chr11 | 117280322 | 117280851 | CEP164   | NM_001271933 | 32 | 31 | 29        | 348                 | 4343 | 203379 | 383,73 | 100                          |
| chr11 | 117281404 | 117281616 | CEP164   | NM_001271933 | 32 | 31 | 30        | 67                  | 245  | 9837   | 46,18  | 100                          |
| chr11 | 117282539 | 117282976 | CEP164   | NM_001271933 | 32 | 31 | 31,32     | 123,97              | 2381 | 113444 | 259    | 77.2,100.0                   |
| chr11 | 119210000 | 119210493 | C1QTNF5  | NM_015645    | 15 | 2  | 15        | 518                 | 1263 | 58801  | 119,03 | 87,5                         |
| chr11 | 119210940 | 119211205 | C1QTNF5  | NM_015645    | 15 | 2  | 14        | 214                 | 20   | 865    | 3,25   | 78,5                         |
| chr11 | 119212215 | 119212658 | C1QTNF5  | NM_015645    | 15 | 2  | 13,12     | 1.078.128           | 333  | 13487  | 30,38  | 24.9,71.9                    |
| chr11 | 119213298 | 119213735 | C1QTNF5  | NM_015645    | 15 | 2  | 11,10     | 132.131             | 745  | 34842  | 79,55  | 100.0,100.0                  |
| chr11 | 119214478 | 119214669 | C1QTNF5  | NM_015645    | 15 | 2  | 9         | 149                 | 508  | 22568  | 117,54 | 96,6                         |
| chr11 | 119215037 | 119215222 | C1QTNF5  | NM_015645    | 15 | 2  | 8         | 77                  | 152  | 5818   | 31,28  | 84,4                         |
| chr11 | 119215287 | 119215662 | C1QTNF5  | NM_015645    | 15 | 2  | 7,6       | 126.131             | 911  | 42654  | 113,44 | 100.0,60.3                   |
| chr11 | 119216066 | 119217312 | C1QTNF5  | NM_015645    | 15 | 2  | 5,4,3,2,1 | 214.156.114.103.214 | 1260 | 59075  | 47,37  | 100.0,100.0,100.0,100.0,66.8 |
| chr12 | 1902685   | 1902855   | CACNA2D4 | NM_172364    | 38 | 38 | 38        | 105                 | 156  | 6141   | 35,91  | 33,3                         |
| chr12 | 1904462   | 1904662   | CACNA2D4 | NM_172364    | 38 | 38 | 37        | 81                  | 372  | 14576  | 72,52  | 100                          |
| chr12 | 1904821   | 1905030   | CACNA2D4 | NM_172364    | 38 | 38 | 36        | 115                 | 190  | 7903   | 37,63  | 100                          |
| chr12 | 1906602   | 1906805   | CACNA2D4 | NM_172364    | 38 | 38 | 35        | 118                 | 247  | 9566   | 46,89  | 84,7                         |
| chr12 | 1908816   | 1909019   | CACNA2D4 | NM_172364    | 38 | 38 | 34        | 21                  | 458  | 17621  | 86,38  | 100                          |
| chr12 | 1909034   | 1909228   | CACNA2D4 | NM_172364    | 38 | 38 | 33        | 53                  | 768  | 32518  | 166,76 | 100                          |
| chr12 | 1909444   | 1909653   | CACNA2D4 | NM_172364    | 38 | 38 | 32        | 53                  | 544  | 24427  | 116,32 | 100                          |
| chr12 | 1910188   | 1910382   | CACNA2D4 | NM_172364    | 38 | 38 | 31        | 76                  | 271  | 11716  | 60,08  | 100                          |
| chr12 | 1910695   | 1910916   | CACNA2D4 | NM_172364    | 38 | 38 | 30        | 71                  | 343  | 14214  | 64,03  | 100                          |
| chr12 | 1919359   | 1919538   | CACNA2D4 | NM_172364    | 38 | 38 | 29        | 63                  | 391  | 17041  | 94,67  | 100                          |
| chr12 | 1919699   | 1919887   | CACNA2D4 | NM_172364    | 38 | 38 | 28        | 45                  | 226  | 9456   | 50,03  | 100                          |
| chr12 | 1920833   | 1921018   | CACNA2D4 | NM_172364    | 38 | 38 | 27        | 62                  | 19   | 839    | 4,51   | 91,9                         |
| chr12 | 1949901   | 1950110   | CACNA2D4 | NM_172364    | 38 | 38 | 26        | 81                  | 107  | 4377   | 20,84  | 100                          |
| chr12 | 1953591   | 1953803   | CACNA2D4 | NM_172364    | 38 | 38 | 25        | 128                 | 743  | 29027  | 136,28 | 82                           |
| chr12 | 1955770   | 1955952   | CACNA2D4 | NM_172364    | 38 | 38 | 24        | 96                  | 346  | 15086  | 82,44  | 89,6                         |
| chr12 | 1963138   | 1963335   | CACNA2D4 | NM_172364    | 38 | 38 | 23        | 94                  | 2393 | 101422 | 512,23 | 77,7                         |
| chr12 | 1965231   | 1965407   | CACNA2D4 | NM_172364    | 38 | 38 | 22,21     | 98,46               | 988  | 41252  | 233,06 | 45.9,100.0                   |
| chr12 | 1967658   | 1967852   | CACNA2D4 | NM_172364    | 38 | 38 | 20        | 68                  | 622  | 25597  | 131,27 | 100                          |
| chr12 | 1969181   | 1969366   | CACNA2D4 | NM_172364    | 38 | 38 | 19        | 62                  | 936  | 39211  | 210,81 | 90,3                         |
| chr12 | 1983753   | 1983962   | CACNA2D4 | NM_172364    | 38 | 38 | 18        | 72                  | 2289 | 102621 | 488,67 | 100                          |
| chr12 | 1984425   | 1984619   | CACNA2D4 | NM_172364    | 38 | 38 | 17        | 87                  | 114  | 5100   | 26,15  | 90,8                         |
| chr12 | 1987374   | 1987568   | CACNA2D4 | NM_172364    | 38 | 38 | 16        | 75                  | 627  | 27670  | 141,9  | 100                          |
| chr12 | 1988136   | 1988336   | CACNA2D4 | NM_172364    | 38 | 38 | 15        | 81                  | 273  | 11802  | 58,72  | 82,7                         |
| chr12 | 1988839   | 1989048   | CACNA2D4 | NM_172364    | 38 | 38 | 14        | 78                  | 230  | 10086  | 48,03  | 100                          |
| chr12 | 1991945   | 1992154   | CACNA2D4 | NM_172364    | 38 | 38 | 13        | 134                 | 208  | 8813   | 41,97  | 91                           |
| chr12 | 1993386   | 1993565   | CACNA2D4 | NM_172364    | 38 | 38 | 12        | 79                  | 1129 | 47245  | 262,47 | 100                          |
| chr12 | 1993952   | 1994330   | CACNA2D4 | NM_172364    | 38 | 38 | 11,10     | 114,90              | 854  | 39850  | 105,15 | 84.2,100.0                   |
| chr12 | 1995103   | 1995288   | CACNA2D4 | NM_172364    | 38 | 38 | 9         | 75                  | 636  | 27092  | 145,66 | 100                          |
| chr12 | 1995336   | 1995548   | CACNA2D4 | NM_172364    | 38 | 38 | 8         | 151                 | 286  | 12434  | 58,38  | 100                          |
| chr12 | 1996113   | 1996289   | CACNA2D4 | NM_172364    | 38 | 38 | 7         | 61                  | 45   | 2036   | 11,5   | 100                          |
| chr12 | 2016610   | 2016795   | CACNA2D4 | NM_172364    | 38 | 38 | 6         | 132                 | 371  | 15816  | 85,03  | 97                           |
| chr12 | 2017036   | 2017206   | CACNA2D4 | NM_172364    | 38 | 38 | 5         | 163                 | 386  | 15548  | 90,92  | 100                          |

|       |          |          |          |           |    |    |             |               |      |        |        |                        |
|-------|----------|----------|----------|-----------|----|----|-------------|---------------|------|--------|--------|------------------------|
| chr12 | 2019076  | 2019273  | CACNA2D4 | NM_172364 | 38 | 38 | 4           | 60            | 48   | 1994   | 10,07  | 93,3                   |
| chr12 | 2022200  | 2022403  | CACNA2D4 | NM_172364 | 38 | 38 | 3           | 117           | 588  | 26034  | 127,62 | 90,6                   |
| chr12 | 2024032  | 2024211  | CACNA2D4 | NM_172364 | 38 | 38 | 2           | 82            | 269  | 10933  | 60,74  | 85,4                   |
| chr12 | 2027325  | 2027608  | CACNA2D4 | NM_172364 | 38 | 38 | 1           | 227           | 310  | 14389  | 50,67  | 86,3                   |
| chr12 | 15130988 | 15131161 | PDE6H    | NM_006205 | 4  | 3  | 2           | 134           | 165  | 6284   | 36,11  | 69,4                   |
| chr12 | 15131969 | 15132172 | PDE6H    | NM_006205 | 4  | 3  | 3           | 41            | 256  | 11019  | 54,01  | 100                    |
| chr12 | 15134334 | 15134546 | PDE6H    | NM_006205 | 4  | 3  | 4           | 77            | 582  | 25230  | 118,45 | 100                    |
| chr12 | 48367071 | 48367357 | COL2A1   | NM_001844 | 54 | 54 | 54          | 147           | 1217 | 54206  | 188,87 | 100                    |
| chr12 | 48367909 | 48368198 | COL2A1   | NM_001844 | 54 | 54 | 53          | 243           | 836  | 36217  | 124,89 | 84,8                   |
| chr12 | 48368394 | 48368594 | COL2A1   | NM_001844 | 54 | 54 | 52          | 188           | 1117 | 49819  | 247,86 | 72,9                   |
| chr12 | 48369037 | 48369314 | COL2A1   | NM_001844 | 54 | 54 | 51          | 289           | 207  | 9072   | 32,63  | 74,4                   |
| chr12 | 48369624 | 48369824 | COL2A1   | NM_001844 | 54 | 54 | 50          | 108           | 319  | 13937  | 69,34  | 73,1                   |
| chr12 | 48370286 | 48370471 | COL2A1   | NM_001844 | 54 | 54 | 49          | 54            | 510  | 21105  | 113,47 | 100                    |
| chr12 | 48370616 | 48371474 | COL2A1   | NM_001844 | 54 | 54 | 48,47,46,45 | 108,54,108,54 | 1753 | 83282  | 96,95  | 80,6,100,0,100,0,100,0 |
| chr12 | 48371823 | 48372260 | COL2A1   | NM_001844 | 54 | 54 | 44,43       | 108,108       | 366  | 16889  | 38,56  | 72,2,100,0             |
| chr12 | 48372435 | 48372611 | COL2A1   | NM_001844 | 54 | 54 | 42          | 162           | 119  | 5517   | 31,17  | 66                     |
| chr12 | 48373289 | 48373468 | COL2A1   | NM_001844 | 54 | 54 | 41          | 54            | 44   | 1860   | 10,33  | 100                    |
| chr12 | 48373772 | 48373966 | COL2A1   | NM_001844 | 54 | 54 | 40          | 54            | 211  | 9343   | 47,91  | 100                    |
| chr12 | 48374353 | 48374764 | COL2A1   | NM_001844 | 54 | 54 | 39,38       | 108,54        | 259  | 12249  | 29,73  | 85,2,100,0             |
| chr12 | 48375097 | 48375267 | COL2A1   | NM_001844 | 54 | 54 | 37          | 54            | 22   | 971    | 5,68   | 100                    |
| chr12 | 48375425 | 48375610 | COL2A1   | NM_001844 | 54 | 54 | 36          | 54            | 134  | 5013   | 26,95  | 96,3                   |
| chr12 | 48375844 | 48376071 | COL2A1   | NM_001844 | 54 | 54 | 35          | 54            | 330  | 15030  | 65,92  | 100                    |
| chr12 | 48376163 | 48376363 | COL2A1   | NM_001844 | 54 | 54 | 34          | 108           | 151  | 6521   | 32,44  | 73,1                   |
| chr12 | 48376701 | 48376981 | COL2A1   | NM_001844 | 54 | 54 | 33,32       | 99,45         | 141  | 5998   | 21,35  | 29,3,100,0             |
| chr12 | 48377070 | 48377252 | COL2A1   | NM_001844 | 54 | 54 | 31          | 54            | 430  | 18803  | 102,75 | 100                    |
| chr12 | 48377461 | 48377649 | COL2A1   | NM_001844 | 54 | 54 | 30          | 54            | 50   | 2275   | 12,04  | 100                    |
| chr12 | 48377859 | 48378044 | COL2A1   | NM_001844 | 54 | 54 | 29          | 54            | 479  | 17596  | 94,6   | 100                    |
| chr12 | 48378315 | 48378524 | COL2A1   | NM_001844 | 54 | 54 | 28          | 54            | 265  | 11497  | 54,75  | 100                    |
| chr12 | 48378669 | 48378863 | COL2A1   | NM_001844 | 54 | 54 | 27          | 99            | 808  | 36289  | 186,1  | 86,9                   |
| chr12 | 48379282 | 48379728 | COL2A1   | NM_001844 | 54 | 54 | 26,25,24    | 54,99,54      | 659  | 29492  | 65,98  | 100,0,100,0,63,0       |
| chr12 | 48380009 | 48380200 | COL2A1   | NM_001844 | 54 | 54 | 23          | 108           | 2172 | 95990  | 499,95 | 75,9                   |
| chr12 | 48380559 | 48380747 | COL2A1   | NM_001844 | 54 | 54 | 22          | 54            | 473  | 20100  | 106,35 | 100                    |
| chr12 | 48380856 | 48381145 | COL2A1   | NM_001844 | 54 | 54 | 21,20       | 99,45         | 745  | 31775  | 109,57 | 100,0,100,0            |
| chr12 | 48381411 | 48381605 | COL2A1   | NM_001844 | 54 | 54 | 19          | 99            | 136  | 6265   | 32,13  | 82,8                   |
| chr12 | 48382988 | 48383206 | COL2A1   | NM_001844 | 54 | 54 | 18          | 54            | 969  | 39273  | 179,33 | 100                    |
| chr12 | 48383390 | 48383605 | COL2A1   | NM_001844 | 54 | 54 | 17          | 45            | 298  | 13194  | 61,08  | 100                    |
| chr12 | 48386536 | 48386712 | COL2A1   | NM_001844 | 54 | 54 | 16          | 54            | 141  | 4955   | 27,99  | 96,3                   |
| chr12 | 48387108 | 48387305 | COL2A1   | NM_001844 | 54 | 54 | 15          | 45            | 357  | 15594  | 78,76  | 100                    |
| chr12 | 48387609 | 48387886 | COL2A1   | NM_001844 | 54 | 54 | 14,13       | 54,54         | 2623 | 119453 | 429,69 | 68,5,100,0             |
| chr12 | 48388058 | 48388282 | COL2A1   | NM_001844 | 54 | 54 | 12          | 54            | 310  | 11861  | 52,72  | 100                    |
| chr12 | 48389009 | 48389200 | COL2A1   | NM_001844 | 54 | 54 | 11          | 54            | 139  | 6024   | 31,38  | 100                    |
| chr12 | 48389482 | 48389667 | COL2A1   | NM_001844 | 54 | 54 | 10,9        | 54,45         | 329  | 13850  | 74,46  | 100,0,22,2             |
| chr12 | 48390323 | 48390541 | COL2A1   | NM_001844 | 54 | 54 | 8           | 78            | 659  | 29747  | 135,83 | 100                    |
| chr12 | 48391449 | 48392043 | COL2A1   | NM_001844 | 54 | 54 | 7,6,5,4     | 102,54,33,33  | 1002 | 46288  | 77,79  | 41,2,100,0,100,0,100,0 |
| chr12 | 48392174 | 48392359 | COL2A1   | NM_001844 | 54 | 54 | 3           | 17            | 259  | 12012  | 64,58  | 100                    |
| chr12 | 48393659 | 48393874 | COL2A1   | NM_001844 | 54 | 54 | 2           | 207           | 218  | 9260   | 42,87  | 83,6                   |
| chr12 | 48397958 | 48398217 | COL2A1   | NM_001844 | 54 | 54 | 1           | 85            | 58   | 2579   | 9,92   | 100                    |
| chr12 | 56115006 | 56115378 | RDH5     | NM_002905 | 5  | 4  | 2           | 310           | 219  | 9235   | 24,76  | 88,1                   |
| chr12 | 56115393 | 56115679 | RDH5     | NM_002905 | 5  | 4  | 3           | 259           | 361  | 16237  | 56,57  | 79,9                   |
| chr12 | 56117585 | 56117782 | RDH5     | NM_002905 | 5  | 4  | 4           | 164           | 899  | 37244  | 188,1  | 68,9                   |
| chr12 | 56118125 | 56118432 | RDH5     | NM_002905 | 5  | 4  | 5           | 224           | 1522 | 67548  | 219,31 | 91,5                   |
| chr12 | 76739517 | 76741643 | BBS10    | NM_024685 | 2  | 2  | 2           | 1975          | 4096 | 196841 | 92,54  | 100                    |
| chr12 | 76741918 | 76742222 | BBS10    | NM_024685 | 2  | 2  | 1           | 197           | 170  | 7140   | 23,41  | 100                    |
| chr12 | 88443010 | 88443290 | CEP290   | NM_025114 | 54 | 53 | 54          | 231           | 59   | 2763   | 9,83   | 78,8                   |

|       |           |           |        |           |    |    |       |         |      |       |        |             |
|-------|-----------|-----------|--------|-----------|----|----|-------|---------|------|-------|--------|-------------|
| chr12 | 88444136  | 88444342  | CEP290 | NM_025114 | 54 | 53 | 53    | 80      | 437  | 18507 | 89,41  | 93,8        |
| chr12 | 88447348  | 88447545  | CEP290 | NM_025114 | 54 | 53 | 52    | 95      | 331  | 12973 | 65,52  | 100         |
| chr12 | 88448065  | 88448244  | CEP290 | NM_025114 | 54 | 53 | 51    | 74      | 752  | 31296 | 173,87 | 100         |
| chr12 | 88449323  | 88449508  | CEP290 | NM_025114 | 54 | 53 | 50    | 142     | 259  | 10789 | 58,01  | 100         |
| chr12 | 88452580  | 88452774  | CEP290 | NM_025114 | 54 | 53 | 49    | 173     | 1238 | 53092 | 272,27 | 86,7        |
| chr12 | 88453656  | 88453850  | CEP290 | NM_025114 | 54 | 53 | 48    | 123     | 285  | 11817 | 60,6   | 100         |
| chr12 | 88454660  | 88454848  | CEP290 | NM_025114 | 54 | 53 | 47    | 165     | 63   | 2704  | 14,31  | 67,9        |
| chr12 | 88456363  | 88456536  | CEP290 | NM_025114 | 54 | 53 | 46    | 87      | 260  | 11009 | 63,27  | 78,2        |
| chr12 | 88457766  | 88457957  | CEP290 | NM_025114 | 54 | 53 | 45    | 135     | 235  | 9616  | 50,08  | 94,1        |
| chr12 | 88462302  | 88462478  | CEP290 | NM_025114 | 54 | 53 | 44    | 124     | 357  | 15638 | 88,35  | 97,6        |
| chr12 | 88465063  | 88465239  | CEP290 | NM_025114 | 54 | 53 | 43    | 156     | 610  | 26072 | 147,3  | 100         |
| chr12 | 88465542  | 88465724  | CEP290 | NM_025114 | 54 | 53 | 42    | 146     | 142  | 5914  | 32,32  | 100         |
| chr12 | 88470932  | 88471123  | CEP290 | NM_025114 | 54 | 53 | 41    | 123     | 317  | 14208 | 74     | 100         |
| chr12 | 88471420  | 88471694  | CEP290 | NM_025114 | 54 | 53 | 40    | 222     | 378  | 17021 | 61,89  | 99,5        |
| chr12 | 88472846  | 88473031  | CEP290 | NM_025114 | 54 | 53 | 39    | 138     | 196  | 7433  | 39,96  | 100         |
| chr12 | 88473944  | 88474132  | CEP290 | NM_025114 | 54 | 53 | 38    | 214     | 363  | 15911 | 84,19  | 81,3        |
| chr12 | 88476846  | 88477022  | CEP290 | NM_025114 | 54 | 53 | 37    | 200     | 332  | 13210 | 74,63  | 81          |
| chr12 | 88477517  | 88477732  | CEP290 | NM_025114 | 54 | 53 | 36    | 108     | 145  | 6283  | 29,09  | 100         |
| chr12 | 88478361  | 88478620  | CEP290 | NM_025114 | 54 | 53 | 35    | 267     | 497  | 22215 | 85,44  | 96,6        |
| chr12 | 88479809  | 88480003  | CEP290 | NM_025114 | 54 | 53 | 34    | 135     | 114  | 4623  | 23,71  | 100         |
| chr12 | 88480136  | 88480318  | CEP290 | NM_025114 | 54 | 53 | 33    | 108     | 299  | 12559 | 68,63  | 100         |
| chr12 | 88481568  | 88481759  | CEP290 | NM_025114 | 54 | 53 | 32    | 165     | 109  | 4360  | 22,71  | 93,3        |
| chr12 | 88482891  | 88483301  | CEP290 | NM_025114 | 54 | 53 | 31    | 456     | 972  | 44812 | 109,03 | 82          |
| chr12 | 88484427  | 88484624  | CEP290 | NM_025114 | 54 | 53 | 30    | 112     | 254  | 10691 | 53,99  | 100         |
| chr12 | 88486433  | 88486627  | CEP290 | NM_025114 | 54 | 53 | 29    | 152     | 850  | 37684 | 193,25 | 100         |
| chr12 | 88487558  | 88487746  | CEP290 | NM_025114 | 54 | 53 | 28    | 206     | 754  | 31454 | 166,42 | 91,7        |
| chr12 | 88490659  | 88490844  | CEP290 | NM_025114 | 54 | 53 | 27    | 112     | 175  | 7340  | 39,46  | 100         |
| chr12 | 88496613  | 88496789  | CEP290 | NM_025114 | 54 | 53 | 26    | 174     | 62   | 2313  | 13,07  | 100         |
| chr12 | 88500383  | 88500835  | CEP290 | NM_025114 | 54 | 53 | 25,24 | 231.103 | 728  | 34756 | 76,72  | 100,0,61,2  |
| chr12 | 88502731  | 88502943  | CEP290 | NM_025114 | 54 | 53 | 23    | 116     | 83   | 3497  | 16,42  | 87,1        |
| chr12 | 88505013  | 88505213  | CEP290 | NM_025114 | 54 | 53 | 22    | 150     | 175  | 6728  | 33,47  | 77,3        |
| chr12 | 88505461  | 88505646  | CEP290 | NM_025114 | 54 | 53 | 21    | 165     | 501  | 20171 | 108,45 | 100         |
| chr12 | 88508146  | 88508328  | CEP290 | NM_025114 | 54 | 53 | 20    | 143     | 302  | 12822 | 70,07  | 92,3        |
| chr12 | 88508789  | 88508977  | CEP290 | NM_025114 | 54 | 53 | 19    | 85      | 126  | 5239  | 27,72  | 100         |
| chr12 | 88510804  | 88510983  | CEP290 | NM_025114 | 54 | 53 | 18    | 113     | 128  | 5184  | 28,8   | 100         |
| chr12 | 88512237  | 88512529  | CEP290 | NM_025114 | 54 | 53 | 17,16 | 88.101  | 707  | 31417 | 107,23 | 100,0,100,0 |
| chr12 | 88513826  | 88514002  | CEP290 | NM_025114 | 54 | 53 | 15    | 163     | 211  | 8281  | 46,79  | 68,7        |
| chr12 | 88514749  | 88514955  | CEP290 | NM_025114 | 54 | 53 | 14    | 170     | 919  | 40421 | 195,27 | 100         |
| chr12 | 88519020  | 88519217  | CEP290 | NM_025114 | 54 | 53 | 13    | 124     | 164  | 7313  | 36,93  | 100         |
| chr12 | 88519987  | 88520178  | CEP290 | NM_025114 | 54 | 53 | 12    | 123     | 513  | 22867 | 119,1  | 69,9        |
| chr12 | 88522703  | 88522882  | CEP290 | NM_025114 | 54 | 53 | 11    | 90      | 359  | 15747 | 87,48  | 100         |
| chr12 | 88523470  | 88523646  | CEP290 | NM_025114 | 54 | 53 | 10    | 183     | 374  | 14395 | 81,33  | 96,2        |
| chr12 | 88524005  | 88524276  | CEP290 | NM_025114 | 54 | 53 | 9     | 153     | 694  | 32167 | 118,26 | 100         |
| chr12 | 88524808  | 88524999  | CEP290 | NM_025114 | 54 | 53 | 7     | 54      | 184  | 7788  | 40,56  | 100         |
| chr12 | 88530370  | 88530561  | CEP290 | NM_025114 | 54 | 53 | 6     | 144     | 515  | 21152 | 110,17 | 98,6        |
| chr12 | 88532820  | 88533014  | CEP290 | NM_025114 | 54 | 53 | 5     | 47      | 166  | 6304  | 32,33  | 100         |
| chr12 | 88533215  | 88533397  | CEP290 | NM_025114 | 54 | 53 | 4     | 70      | 178  | 7977  | 43,59  | 100         |
| chr12 | 88534785  | 88535139  | CEP290 | NM_025114 | 54 | 53 | 3,2   | 78.102  | 319  | 14619 | 41,18  | 33,3,100,0  |
| chr12 | 110012497 | 110012700 | MVK    | NM_000431 | 11 | 10 | 2     | 78      | 671  | 28988 | 142,1  | 93,6        |
| chr12 | 110013716 | 110013901 | MVK    | NM_000431 | 11 | 10 | 3     | 148     | 505  | 22427 | 120,58 | 66,9        |
| chr12 | 110017506 | 110017727 | MVK    | NM_000431 | 11 | 10 | 4     | 145     | 744  | 33124 | 149,21 | 83,4        |
| chr12 | 110019252 | 110019437 | MVK    | NM_000431 | 11 | 10 | 5     | 156     | 426  | 19031 | 102,32 | 66,7        |
| chr12 | 110023850 | 110024038 | MVK    | NM_000431 | 11 | 10 | 6     | 104     | 215  | 9706  | 51,35  | 77,9        |
| chr12 | 110024436 | 110024612 | MVK    | NM_000431 | 11 | 10 | 7     | 46      | 156  | 6808  | 38,46  | 100         |

|       |           |           |         |           |    |    |       |         |      |        |        |            |
|-------|-----------|-----------|---------|-----------|----|----|-------|---------|------|--------|--------|------------|
| chr12 | 110028583 | 110028768 | MVK     | NM_000431 | 11 | 10 | 8     | 91      | 432  | 18141  | 97,53  | 92,3       |
| chr12 | 110029072 | 110029275 | MVK     | NM_000431 | 11 | 10 | 9     | 117     | 381  | 15361  | 75,3   | 77,8       |
| chr12 | 110032746 | 110032937 | MVK     | NM_000431 | 11 | 10 | 10    | 154     | 355  | 14426  | 75,14  | 68,2       |
| chr12 | 110034155 | 110034352 | MVK     | NM_000431 | 11 | 10 | 11    | 152     | 146  | 6425   | 32,45  | 80,3       |
| chr13 | 114321700 | 114322445 | GRK1    | NM_002929 | 7  | 7  | 1     | 699     | 752  | 36385  | 48,77  | 100        |
| chr13 | 114323934 | 114324134 | GRK1    | NM_002929 | 7  | 7  | 2     | 128     | 932  | 41939  | 208,65 | 100        |
| chr13 | 114325727 | 114325930 | GRK1    | NM_002929 | 7  | 7  | 3     | 158     | 348  | 14596  | 71,55  | 74,1       |
| chr13 | 114426033 | 114426248 | GRK1    | NM_002929 | 7  | 7  | 4     | 84      | 126  | 4325   | 20,02  | 100        |
| chr13 | 114434159 | 114434344 | GRK1    | NM_002929 | 7  | 7  | 5     | 125     | 322  | 14200  | 76,34  | 100        |
| chr13 | 114435800 | 114435994 | GRK1    | NM_002929 | 7  | 7  | 6     | 202     | 385  | 16727  | 85,78  | 68,3       |
| chr13 | 114437994 | 114438256 | GRK1    | NM_002929 | 7  | 7  | 7     | 296     | 503  | 23044  | 87,62  | 73         |
| chr14 | 21756014  | 21756202  | RPGRIP1 | NM_020366 | 24 | 24 | 1     | 85      | 318  | 14513  | 76,79  | 78,8       |
| chr14 | 21762774  | 21762956  | RPGRIP1 | NM_020366 | 24 | 24 | 2     | 133     | 72   | 3077   | 16,81  | 91         |
| chr14 | 21769047  | 21769348  | RPGRIP1 | NM_020366 | 24 | 24 | 3     | 272     | 335  | 13116  | 43,43  | 82,4       |
| chr14 | 21770669  | 21770854  | RPGRIP1 | NM_020366 | 24 | 24 | 4     | 97      | 638  | 25174  | 135,34 | 77,3       |
| chr14 | 21771468  | 21771665  | RPGRIP1 | NM_020366 | 24 | 24 | 5     | 213     | 185  | 8117   | 40,99  | 82,6       |
| chr14 | 21775796  | 21776005  | RPGRIP1 | NM_020366 | 24 | 24 | 6     | 106     | 205  | 9129   | 43,47  | 100        |
| chr14 | 21778728  | 21778904  | RPGRIP1 | NM_020366 | 24 | 24 | 7     | 24      | 211  | 9008   | 50,89  | 100        |
| chr14 | 21780030  | 21780203  | RPGRIP1 | NM_020366 | 24 | 24 | 8     | 147     | 186  | 7570   | 43,51  | 68         |
| chr14 | 21780512  | 21780694  | RPGRIP1 | NM_020366 | 24 | 24 | 9     | 74      | 202  | 9110   | 49,78  | 100        |
| chr14 | 21785681  | 21785988  | RPGRIP1 | NM_020366 | 24 | 24 | 10    | 155     | 356  | 15861  | 51,5   | 86,5       |
| chr14 | 21788104  | 21788280  | RPGRIP1 | NM_020366 | 24 | 24 | 11    | 161     | 254  | 9888   | 55,86  | 65,2       |
| chr14 | 21789364  | 21789549  | RPGRIP1 | NM_020366 | 24 | 24 | 12    | 144     | 387  | 16655  | 89,54  | 91,7       |
| chr14 | 21789969  | 21790148  | RPGRIP1 | NM_020366 | 24 | 24 | 13    | 151     | 64   | 3002   | 16,68  | 90,1       |
| chr14 | 21792718  | 21793484  | RPGRIP1 | NM_020366 | 24 | 24 | 14,15 | 453.152 | 3713 | 176268 | 229,81 | 100,0,61.8 |
| chr14 | 21794046  | 21794415  | RPGRIP1 | NM_020366 | 24 | 24 | 16    | 343     | 4330 | 191356 | 517,18 | 83,7       |
| chr14 | 21795740  | 21795940  | RPGRIP1 | NM_020366 | 24 | 24 | 17    | 185     | 363  | 14944  | 74,35  | 85,9       |
| chr14 | 21796649  | 21796840  | RPGRIP1 | NM_020366 | 24 | 24 | 18    | 204     | 284  | 11295  | 58,83  | 67,6       |
| chr14 | 21798376  | 21798564  | RPGRIP1 | NM_020366 | 24 | 24 | 19    | 139     | 405  | 18303  | 96,84  | 100        |
| chr14 | 21802713  | 21802910  | RPGRIP1 | NM_020366 | 24 | 24 | 20    | 101     | 352  | 16104  | 81,33  | 100        |
| chr14 | 21811118  | 21811315  | RPGRIP1 | NM_020366 | 24 | 24 | 21    | 193     | 484  | 21450  | 108,33 | 62,7       |
| chr14 | 21813222  | 21813425  | RPGRIP1 | NM_020366 | 24 | 24 | 22    | 85      | 321  | 12742  | 62,46  | 100        |
| chr14 | 21816328  | 21816510  | RPGRIP1 | NM_020366 | 24 | 24 | 23    | 131     | 150  | 6203   | 33,9   | 100        |
| chr14 | 21819203  | 21819424  | RPGRIP1 | NM_020366 | 24 | 24 | 24    | 113     | 771  | 34145  | 153,81 | 100        |
| chr14 | 24550355  | 24550742  | NRL     | NM_006177 | 3  | 2  | 3     | 333     | 225  | 10252  | 26,42  | 89,5       |
| chr14 | 24551662  | 24552099  | NRL     | NM_006177 | 3  | 2  | 2     | 381     | 379  | 16747  | 38,24  | 100        |
| chr14 | 57268370  | 57269115  | OTX2    | NM_021728 | 5  | 3  | 5     | 621     | 3058 | 147186 | 197,3  | 100        |
| chr14 | 57270842  | 57271033  | OTX2    | NM_021728 | 5  | 3  | 4     | 176     | 741  | 32502  | 169,28 | 72,7       |
| chr14 | 57272069  | 57272239  | OTX2    | NM_021728 | 5  | 3  | 3     | 97      | 659  | 28048  | 164,02 | 100        |
| chr14 | 68189347  | 68189538  | RDH12   | NM_152443 | 9  | 7  | 3     | 68      | 21   | 922    | 4,8    | 100        |
| chr14 | 68191082  | 68191282  | RDH12   | NM_152443 | 9  | 7  | 4     | 119     | 412  | 16983  | 84,49  | 78,2       |
| chr14 | 68191742  | 68191942  | RDH12   | NM_152443 | 9  | 7  | 5     | 156     | 240  | 10143  | 50,46  | 81,4       |
| chr14 | 68192779  | 68192991  | RDH12   | NM_152443 | 9  | 7  | 6     | 105     | 228  | 9975   | 46,83  | 89,5       |
| chr14 | 68193762  | 68193959  | RDH12   | NM_152443 | 9  | 7  | 7     | 210     | 434  | 18149  | 91,66  | 69,5       |
| chr14 | 68195827  | 68196042  | RDH12   | NM_152443 | 9  | 7  | 8     | 190     | 47   | 2119   | 9,81   | 71,1       |
| chr14 | 68200362  | 68200538  | RDH12   | NM_152443 | 9  | 7  | 9     | 103     | 401  | 16384  | 92,56  | 73,8       |
| chr14 | 88852014  | 88852226  | SPATA7  | NM_018418 | 12 | 12 | 1     | 19      | 105  | 4387   | 20,6   | 100        |
| chr14 | 88857692  | 88857877  | SPATA7  | NM_018418 | 12 | 12 | 2     | 75      | 52   | 1951   | 10,49  | 100        |
| chr14 | 88859729  | 88859899  | SPATA7  | NM_018418 | 12 | 12 | 3     | 96      | 99   | 4180   | 24,44  | 100        |
| chr14 | 88862402  | 88862581  | SPATA7  | NM_018418 | 12 | 12 | 4     | 48      | 78   | 3247   | 18,04  | 100        |
| chr14 | 88882985  | 88883179  | SPATA7  | NM_018418 | 12 | 12 | 5     | 134     | 26   | 1003   | 5,14   | 93,3       |
| chr14 | 88892536  | 88893041  | SPATA7  | NM_018418 | 12 | 12 | 6     | 473     | 1577 | 74887  | 148    | 98,5       |
| chr14 | 88893983  | 88894189  | SPATA7  | NM_018418 | 12 | 12 | 7     | 67      | 82   | 3494   | 16,88  | 86,6       |
| chr14 | 88895676  | 88895867  | SPATA7  | NM_018418 | 12 | 12 | 8     | 116     | 484  | 20548  | 107,02 | 100        |

|       |          |          |         |           |    |    |     |        |      |        |        |            |
|-------|----------|----------|---------|-----------|----|----|-----|--------|------|--------|--------|------------|
| chr14 | 88897448 | 88897633 | SPATA7  | NM_018418 | 12 | 12 | 9   | 54     | 766  | 33870  | 182,1  | 100        |
| chr14 | 88899402 | 88899581 | SPATA7  | NM_018418 | 12 | 12 | 10  | 78     | 228  | 9655   | 53,64  | 100        |
| chr14 | 88903792 | 88903968 | SPATA7  | NM_018418 | 12 | 12 | 11  | 55     | 135  | 6100   | 34,46  | 100        |
| chr14 | 88904194 | 88904794 | SPATA7  | NM_018418 | 12 | 12 | 12  | 585    | 1200 | 56742  | 94,41  | 97,9       |
| chr14 | 89291047 | 89291232 | TTC8    | NM_144596 | 15 | 15 | 1   | 114    | 191  | 7704   | 41,42  | 100        |
| chr14 | 89299948 | 89300136 | TTC8    | NM_144596 | 15 | 15 | 2   | 30     | 278  | 12036  | 63,68  | 100        |
| chr14 | 89305794 | 89305982 | TTC8    | NM_144596 | 15 | 15 | 3   | 121    | 162  | 7270   | 38,47  | 100        |
| chr14 | 89307143 | 89307482 | TTC8    | NM_144596 | 15 | 15 | 4,5 | 64.160 | 1492 | 71010  | 208,85 | 100,0,63.7 |
| chr14 | 89307679 | 89307864 | TTC8    | NM_144596 | 15 | 15 | 6   | 90     | 149  | 5922   | 31,84  | 100        |
| chr14 | 89310041 | 89310250 | TTC8    | NM_144596 | 15 | 15 | 7   | 45     | 124  | 5464   | 26,02  | 100        |
| chr14 | 89319299 | 89319484 | TTC8    | NM_144596 | 15 | 15 | 8   | 86     | 365  | 14926  | 80,25  | 100        |
| chr14 | 89323498 | 89323695 | TTC8    | NM_144596 | 15 | 15 | 9   | 88     | 356  | 15740  | 79,49  | 100        |
| chr14 | 89327532 | 89327705 | TTC8    | NM_144596 | 15 | 15 | 10  | 111    | 298  | 12692  | 72,94  | 100        |
| chr14 | 89336411 | 89336596 | TTC8    | NM_144596 | 15 | 15 | 11  | 140    | 994  | 40386  | 217,13 | 94,3       |
| chr14 | 89337831 | 89338025 | TTC8    | NM_144596 | 15 | 15 | 12  | 175    | 299  | 13020  | 66,77  | 76         |
| chr14 | 89338559 | 89338768 | TTC8    | NM_144596 | 15 | 15 | 13  | 123    | 643  | 27176  | 129,41 | 77,2       |
| chr14 | 89341290 | 89341484 | TTC8    | NM_144596 | 15 | 15 | 14  | 84     | 135  | 6228   | 31,94  | 100        |
| chr14 | 89343604 | 89343783 | TTC8    | NM_144596 | 15 | 15 | 15  | 117    | 120  | 4166   | 23,14  | 100        |
| chr15 | 31293946 | 31295349 | TRPM1   | NM_002420 | 27 | 26 | 27  | 1249   | 6309 | 306504 | 218,31 | 100        |
| chr15 | 31318370 | 31318564 | TRPM1   | NM_002420 | 27 | 26 | 26  | 133    | 147  | 6171   | 31,65  | 78,9       |
| chr15 | 31319148 | 31319342 | TRPM1   | NM_002420 | 27 | 26 | 25  | 203    | 186  | 7865   | 40,33  | 85,2       |
| chr15 | 31320491 | 31320721 | TRPM1   | NM_002420 | 27 | 26 | 24  | 145    | 204  | 8959   | 38,78  | 100        |
| chr15 | 31321528 | 31321701 | TRPM1   | NM_002420 | 27 | 26 | 23  | 21     | 589  | 25059  | 144,02 | 100        |
| chr15 | 31323103 | 31323297 | TRPM1   | NM_002420 | 27 | 26 | 22  | 175    | 671  | 30946  | 158,7  | 64         |
| chr15 | 31324940 | 31325214 | TRPM1   | NM_002420 | 27 | 26 | 21  | 252    | 1330 | 60120  | 218,62 | 81         |
| chr15 | 31327778 | 31327972 | TRPM1   | NM_002420 | 27 | 26 | 20  | 129    | 247  | 9211   | 47,24  | 77,5       |
| chr15 | 31329831 | 31330004 | TRPM1   | NM_002420 | 27 | 26 | 19  | 132    | 135  | 5725   | 32,9   | 68,9       |
| chr15 | 31330234 | 31330431 | TRPM1   | NM_002420 | 27 | 26 | 18  | 123    | 159  | 6466   | 32,66  | 100        |
| chr15 | 31332363 | 31332631 | TRPM1   | NM_002420 | 27 | 26 | 17  | 229    | 1414 | 62161  | 231,08 | 81,7       |
| chr15 | 31334225 | 31334499 | TRPM1   | NM_002420 | 27 | 26 | 16  | 293    | 309  | 13690  | 49,78  | 75,8       |
| chr15 | 31338336 | 31338527 | TRPM1   | NM_002420 | 27 | 26 | 15  | 30     | 315  | 14233  | 74,13  | 100        |
| chr15 | 31339238 | 31339438 | TRPM1   | NM_002420 | 27 | 26 | 14  | 141    | 993  | 42178  | 209,84 | 88,7       |
| chr15 | 31339971 | 31340153 | TRPM1   | NM_002420 | 27 | 26 | 13  | 51     | 357  | 13018  | 71,14  | 100        |
| chr15 | 31341559 | 31341729 | TRPM1   | NM_002420 | 27 | 26 | 12  | 135    | 184  | 6993   | 40,89  | 100        |
| chr15 | 31342580 | 31342759 | TRPM1   | NM_002420 | 27 | 26 | 11  | 174    | 2593 | 115035 | 639,08 | 85,1       |
| chr15 | 31352651 | 31352881 | TRPM1   | NM_002420 | 27 | 26 | 10  | 101    | 440  | 19008  | 82,29  | 100        |
| chr15 | 31353652 | 31353828 | TRPM1   | NM_002420 | 27 | 26 | 9   | 73     | 319  | 13921  | 78,65  | 90,4       |
| chr15 | 31354686 | 31354892 | TRPM1   | NM_002420 | 27 | 26 | 8   | 124    | 450  | 19626  | 94,81  | 89,5       |
| chr15 | 31355232 | 31355447 | TRPM1   | NM_002420 | 27 | 26 | 7   | 175    | 1357 | 56967  | 263,74 | 72,6       |
| chr15 | 31358339 | 31358530 | TRPM1   | NM_002420 | 27 | 26 | 6   | 172    | 97   | 4192   | 21,83  | 65,1       |
| chr15 | 31359215 | 31359430 | TRPM1   | NM_002420 | 27 | 26 | 5   | 125    | 760  | 34242  | 158,53 | 100        |
| chr15 | 31360142 | 31360354 | TRPM1   | NM_002420 | 27 | 26 | 4   | 214    | 263  | 10950  | 51,41  | 72         |
| chr15 | 31362004 | 31362465 | TRPM1   | NM_002420 | 27 | 26 | 3   | 196    | 1977 | 96574  | 209,03 | 100        |
| chr15 | 31369109 | 31369306 | TRPM1   | NM_002420 | 27 | 26 | 2   | 17     | 738  | 29887  | 150,94 | 94,1       |
| chr15 | 65916447 | 65918321 | SLC24A1 | NM_004727 | 10 | 9  | 2   | 1890   | 8225 | 398303 | 212,43 | 98,5       |
| chr15 | 65930326 | 65930517 | SLC24A1 | NM_004727 | 10 | 9  | 3   | 54     | 304  | 12664  | 65,96  | 96,3       |
| chr15 | 65931952 | 65932161 | SLC24A1 | NM_004727 | 10 | 9  | 4   | 109    | 814  | 34661  | 165,05 | 82,6       |
| chr15 | 65936647 | 65936844 | SLC24A1 | NM_004727 | 10 | 9  | 5   | 87     | 769  | 33253  | 167,94 | 92         |
| chr15 | 65937829 | 65938029 | SLC24A1 | NM_004727 | 10 | 9  | 6   | 92     | 2002 | 91282  | 454,14 | 87         |
| chr15 | 65942639 | 65943064 | SLC24A1 | NM_004727 | 10 | 9  | 7   | 561    | 151  | 7098   | 16,66  | 61,5       |
| chr15 | 65943131 | 65943251 | SLC24A1 | NM_004727 | 10 | 9  | 7   | 561    | 292  | 9554   | 78,96  | 21,6       |
| chr15 | 65943962 | 65944141 | SLC24A1 | NM_004727 | 10 | 9  | 8   | 90     | 372  | 16194  | 89,97  | 100        |
| chr15 | 65945019 | 65945237 | SLC24A1 | NM_004727 | 10 | 9  | 9   | 167    | 642  | 27691  | 126,44 | 76,6       |
| chr15 | 65946125 | 65946414 | SLC24A1 | NM_004727 | 10 | 9  | 10  | 250    | 897  | 38920  | 134,21 | 98,8       |

|       |          |          |       |              |    |    |                   |                           |      |        |        |                                     |
|-------|----------|----------|-------|--------------|----|----|-------------------|---------------------------|------|--------|--------|-------------------------------------|
| chr15 | 72102990 | 72103178 | NR2E3 | NM_014249    | 9  | 9  | 1                 | 118                       | 149  | 6416   | 33,95  | 80,5                                |
| chr15 | 72103835 | 72104897 | NR2E3 | NM_014249    | 9  | 9  | 2,3,4,5           | 127.104.222.176           | 2083 | 100632 | 94,67  | 90,6,100,0,100,0,100,0              |
| chr15 | 72105780 | 72106057 | NR2E3 | NM_014249    | 9  | 9  | 6,7               | 200,47                    | 1213 | 53862  | 193,75 | 74,5,100,0                          |
| chr15 | 72106366 | 72106578 | NR2E3 | NM_014249    | 9  | 9  | 8                 | 106                       | 1168 | 44786  | 210,26 | 87,7                                |
| chr15 | 72109900 | 72110088 | NR2E3 | NM_014249    | 9  | 9  | 9                 | 133                       | 135  | 5530   | 29,26  | 94,7                                |
| chr15 | 72978385 | 72978615 | BBS4  | NM_033028    | 16 | 16 | 1                 | 24                        | 1185 | 49082  | 212,48 | 100                                 |
| chr15 | 72987175 | 72987615 | BBS4  | NM_033028    | 16 | 16 | 2                 | 52                        | 637  | 30695  | 69,6   | 100                                 |
| chr15 | 73001968 | 73002183 | BBS4  | NM_033028    | 16 | 16 | 3                 | 80                        | 205  | 8626   | 39,94  | 100                                 |
| chr15 | 73004516 | 73004719 | BBS4  | NM_033028    | 16 | 16 | 4                 | 64                        | 173  | 7471   | 36,62  | 100                                 |
| chr15 | 73007533 | 73007727 | BBS4  | NM_033028    | 16 | 16 | 5                 | 112                       | 254  | 9800   | 50,26  | 85,7                                |
| chr15 | 73008979 | 73009203 | BBS4  | NM_033028    | 16 | 16 | 6                 | 73                        | 315  | 14326  | 63,67  | 100                                 |
| chr15 | 73015034 | 73015237 | BBS4  | NM_033028    | 16 | 16 | 7                 | 54                        | 206  | 9196   | 45,08  | 100                                 |
| chr15 | 73016829 | 73017038 | BBS4  | NM_033028    | 16 | 16 | 8                 | 128                       | 142  | 6420   | 30,57  | 100                                 |
| chr15 | 73020207 | 73020416 | BBS4  | NM_033028    | 16 | 16 | 9                 | 55                        | 619  | 28535  | 135,88 | 100                                 |
| chr15 | 73021944 | 73022156 | BBS4  | NM_033028    | 16 | 16 | 10                | 69                        | 372  | 15307  | 71,86  | 100                                 |
| chr15 | 73023705 | 73024142 | BBS4  | NM_033028    | 16 | 16 | 11,12             | 153.172                   | 1070 | 50267  | 114,76 | 61,4,100,0                          |
| chr15 | 73027365 | 73027550 | BBS4  | NM_033028    | 16 | 16 | 13                | 70                        | 90   | 3988   | 21,44  | 100                                 |
| chr15 | 73028202 | 73028393 | BBS4  | NM_033028    | 16 | 16 | 14                | 142                       | 325  | 11598  | 60,41  | 74,6                                |
| chr15 | 73029070 | 73029276 | BBS4  | NM_033028    | 16 | 16 | 15                | 202                       | 664  | 25972  | 125,47 | 86,1                                |
| chr15 | 73029879 | 73030067 | BBS4  | NM_033028    | 16 | 16 | 16                | 110                       | 227  | 10061  | 53,23  | 45,5                                |
| chr15 | 78397472 | 78397687 | CIB2  | NM_001271888 | 5  | 4  | 5                 | 22                        | 131  | 5582   | 25,84  | 100                                 |
| chr15 | 78398065 | 78398348 | CIB2  | NM_001271888 | 5  | 4  | 4                 | 196                       | 1081 | 51641  | 181,83 | 100                                 |
| chr15 | 78401544 | 78401747 | CIB2  | NM_001271888 | 5  | 4  | 3                 | 148                       | 1036 | 42232  | 207,02 | 100                                 |
| chr15 | 78403519 | 78403719 | CIB2  | NM_001271888 | 5  | 4  | 2                 | 69                        | 230  | 9673   | 48,12  | 82,6                                |
| chr15 | 78423442 | 78423719 | CIB2  | NM_001271888 | 5  | 4  | 1                 | 371                       | 4    | 175    | 0,63   | 57,4                                |
| chr15 | 89753419 | 89753628 | RLBP1 | NM_000326    | 9  | 7  | 9                 | 159                       | 208  | 9142   | 43,53  | 71,1                                |
| chr15 | 89753893 | 89754072 | RLBP1 | NM_000326    | 9  | 7  | 8                 | 111                       | 281  | 12113  | 67,29  | 100                                 |
| chr15 | 89755015 | 89755227 | RLBP1 | NM_000326    | 9  | 7  | 7                 | 159                       | 408  | 17632  | 82,78  | 74,2                                |
| chr15 | 89758222 | 89758404 | RLBP1 | NM_000326    | 9  | 7  | 6                 | 179                       | 736  | 31783  | 173,68 | 63,7                                |
| chr15 | 89760397 | 89760627 | RLBP1 | NM_000326    | 9  | 7  | 5                 | 205                       | 169  | 7668   | 33,19  | 77,6                                |
| chr15 | 89761834 | 89762031 | RLBP1 | NM_000326    | 9  | 7  | 4                 | 129                       | 348  | 13427  | 67,81  | 70,5                                |
| chr15 | 89762145 | 89762369 | RLBP1 | NM_000326    | 9  | 7  | 3                 | 12                        | 215  | 9405   | 41,8   | 100                                 |
| chr16 | 1401413  | 1402330  | GNPTG | NM_032520    | 11 | 11 | 1,2,3             | 52,58,68                  | 43   | 1959   | 2,13   | 100,0,100,0,100,0                   |
| chr16 | 1411662  | 1413154  | GNPTG | NM_032520    | 11 | 11 | 4,5,6,7,8,9,10,11 | 55,84,94,115,83,132,82,95 | 2184 | 103115 | 69,07  | 100,0,100,0,100,0,100,0,100,0,100,0 |
| chr16 | 4382212  | 4382400  | GLIS2 | NM_032575    | 6  | 6  | 1                 | 172                       | 104  | 4225   | 22,35  | 69,2                                |
| chr16 | 4383276  | 4383470  | GLIS2 | NM_032575    | 6  | 6  | 2                 | 173                       | 443  | 19543  | 100,22 | 71,1                                |
| chr16 | 4384803  | 4385397  | GLIS2 | NM_032575    | 6  | 6  | 3,4,5             | 177.134.119               | 821  | 38103  | 64,04  | 99,4,100,0,100,0                    |
| chr16 | 4386646  | 4387625  | GLIS2 | NM_032575    | 6  | 6  | 6                 | 800                       | 682  | 32679  | 33,35  | 100                                 |
| chr16 | 16243855 | 16244076 | ABCC6 | NM_001171    | 31 | 31 | 31                | 109                       | 240  | 9753   | 43,93  | 79,8                                |
| chr16 | 16244464 | 16244667 | ABCC6 | NM_001171    | 31 | 31 | 30                | 195                       | 204  | 8514   | 41,74  | 85,1                                |
| chr16 | 16248502 | 16249111 | ABCC6 | NM_001171    | 31 | 31 | 29,28             | 167.159                   | 517  | 23249  | 38,11  | 89,8,100,0                          |
| chr16 | 16251423 | 16251617 | ABCC6 | NM_001171    | 31 | 31 | 27                | 147                       | 143  | 6116   | 31,36  | 66,7                                |
| chr16 | 16253334 | 16253522 | ABCC6 | NM_001171    | 31 | 31 | 26                | 102                       | 117  | 4996   | 26,43  | 100                                 |
| chr16 | 16255308 | 16255520 | ABCC6 | NM_001171    | 31 | 31 | 25                | 127                       | 135  | 5519   | 25,91  | 89,8                                |
| chr16 | 16256774 | 16256989 | ABCC6 | NM_001171    | 31 | 31 | 24                | 200                       | 1252 | 55401  | 256,49 | 70                                  |
| chr16 | 16259395 | 16259743 | ABCC6 | NM_001171    | 31 | 31 | 23                | 311                       | 630  | 29589  | 84,78  | 84,9                                |
| chr16 | 16263536 | 16263730 | ABCC6 | NM_001171    | 31 | 31 | 22                | 208                       | 18   | 617    | 3,16   | 84,1                                |
| chr16 | 16267175 | 16267357 | ABCC6 | NM_001171    | 31 | 31 | 21                | 121                       | 422  | 17517  | 95,72  | 71,9                                |
| chr16 | 16269774 | 16269956 | ABCC6 | NM_001171    | 31 | 31 | 20                | 76                        | 1401 | 59602  | 325,69 | 92,1                                |
| chr16 | 16271283 | 16271486 | ABCC6 | NM_001171    | 31 | 31 | 19                | 175                       | 494  | 21288  | 104,35 | 100                                 |
| chr16 | 16272575 | 16272772 | ABCC6 | NM_001171    | 31 | 31 | 18                | 168                       | 411  | 17766  | 89,73  | 70,2                                |
| chr16 | 16276184 | 16276396 | ABCC6 | NM_001171    | 31 | 31 | 17                | 177                       | 1038 | 45305  | 212,7  | 72,3                                |
| chr16 | 16276698 | 16276895 | ABCC6 | NM_001171    | 31 | 31 | 16                | 127                       | 168  | 7139   | 36,06  | 70,9                                |
| chr16 | 16278693 | 16278884 | ABCC6 | NM_001171    | 31 | 31 | 15                | 76                        | 346  | 13854  | 72,16  | 90,8                                |

|       |          |          |          |              |    |    |             |             |      |        |        |                        |
|-------|----------|----------|----------|--------------|----|----|-------------|-------------|------|--------|--------|------------------------|
| chr16 | 16280993 | 16281187 | ABCC6    | NM_001171    | 31 | 31 | 14          | 88          | 61   | 2616   | 13,42  | 86,4                   |
| chr16 | 16282671 | 16282850 | ABCC6    | NM_001171    | 31 | 31 | 13          | 144         | 220  | 9112   | 50,62  | 100                    |
| chr16 | 16284097 | 16284276 | ABCC6    | NM_001171    | 31 | 31 | 12          | 204         | 302  | 13183  | 73,24  | 62,7                   |
| chr16 | 16286614 | 16286790 | ABCC6    | NM_001171    | 31 | 31 | 11          | 93          | 120  | 5111   | 28,88  | 100                    |
| chr16 | 16291795 | 16291995 | ABCC6    | NM_001171    | 31 | 31 | 10          | 162         | 177  | 7328   | 36,46  | 72,8                   |
| chr16 | 28488741 | 28489169 | CLN3     | NM_001042432 | 16 | 15 | 16,15       | 120.141     | 391  | 17369  | 40,49  | 100.0,79.4             |
| chr16 | 28493445 | 28494042 | CLN3     | NM_001042432 | 16 | 15 | 14,13,12,11 | 94,56,69,47 | 1083 | 50641  | 84,68  | 79.8,100.0,100.0,100.0 |
| chr16 | 28495351 | 28495548 | CLN3     | NM_001042432 | 16 | 15 | 10          | 113         | 206  | 8552   | 43,19  | 78,8                   |
| chr16 | 28497687 | 28498065 | CLN3     | NM_001042432 | 16 | 15 | 9,8         | 144,73      | 807  | 36381  | 95,99  | 86.8,100.0             |
| chr16 | 28498719 | 28499011 | CLN3     | NM_001042432 | 16 | 15 | 7,6         | 86,80       | 635  | 26443  | 90,25  | 100.0,36.2             |
| chr16 | 28499916 | 28500104 | CLN3     | NM_001042432 | 16 | 15 | 5           | 72          | 422  | 18247  | 96,54  | 94,4                   |
| chr16 | 28500576 | 28500788 | CLN3     | NM_001042432 | 16 | 15 | 4           | 97          | 403  | 18268  | 85,77  | 100                    |
| chr16 | 28502824 | 28503190 | CLN3     | NM_001042432 | 16 | 15 | 3,2         | 79,46       | 263  | 12064  | 32,87  | 73.4,100.0             |
| chr16 | 49525172 | 49525354 | ZNF423   | NM_015069    | 8  | 8  | 8           | 30          | 914  | 37068  | 202,56 | 100                    |
| chr16 | 49557537 | 49557731 | ZNF423   | NM_015069    | 8  | 8  | 7           | 116         | 221  | 9169   | 47,02  | 98,3                   |
| chr16 | 49559179 | 49559385 | ZNF423   | NM_015069    | 8  | 8  | 6           | 132         | 301  | 13362  | 64,55  | 84,8                   |
| chr16 | 49660076 | 49660273 | ZNF423   | NM_015069    | 8  | 8  | 5           | 85          | 62   | 2645   | 13,36  | 100                    |
| chr16 | 49669563 | 49672812 | ZNF423   | NM_015069    | 8  | 8  | 4           | 3215        | 8377 | 398362 | 122,57 | 100                    |
| chr16 | 49764756 | 49764947 | ZNF423   | NM_015069    | 8  | 8  | 3           | 201         | 2263 | 99370  | 517,55 | 63,2                   |
| chr16 | 49823390 | 49823572 | ZNF423   | NM_015069    | 8  | 8  | 2           | 60          | 236  | 10686  | 58,39  | 100                    |
| chr16 | 49856557 | 49856745 | ZNF423   | NM_015069    | 8  | 8  | 1           | 16          | 158  | 6899   | 36,5   | 100                    |
| chr16 | 53636015 | 53636191 | RPGRIP1L | NM_015272    | 27 | 26 | 27          | 113         | 207  | 8834   | 49,91  | 76,1                   |
| chr16 | 53639264 | 53639452 | RPGRIP1L | NM_015272    | 27 | 26 | 26          | 134         | 303  | 12858  | 68,03  | 44,8                   |
| chr16 | 53644760 | 53644966 | RPGRIP1L | NM_015272    | 27 | 26 | 25          | 85          | 660  | 30554  | 147,6  | 100                    |
| chr16 | 53652895 | 53653113 | RPGRIP1L | NM_015272    | 27 | 26 | 24          | 184         | 321  | 13858  | 63,28  | 96,2                   |
| chr16 | 53656254 | 53656374 | RPGRIP1L | NM_015272    | 27 | 26 | 23          | 138         | 17   | 541    | 4,47   | 10,9                   |
| chr16 | 53670296 | 53670484 | RPGRIP1L | NM_015272    | 27 | 26 | 22          | 74          | 257  | 10946  | 57,92  | 100                    |
| chr16 | 53671592 | 53671786 | RPGRIP1L | NM_015272    | 27 | 26 | 21          | 160         | 970  | 41097  | 210,75 | 100                    |
| chr16 | 53672205 | 53672390 | RPGRIP1L | NM_015272    | 27 | 26 | 20          | 102         | 360  | 16316  | 87,72  | 100                    |
| chr16 | 53674954 | 53675373 | RPGRIP1L | NM_015272    | 27 | 26 | 19,18       | 84.191      | 597  | 27365  | 65,15  | 89.3,92.7              |
| chr16 | 53679529 | 53679978 | RPGRIP1L | NM_015272    | 27 | 26 | 17          | 379         | 655  | 31125  | 69,17  | 100                    |
| chr16 | 53682845 | 53683054 | RPGRIP1L | NM_015272    | 27 | 26 | 16          | 152         | 87   | 3590   | 17,1   | 100                    |
| chr16 | 53686449 | 53686904 | RPGRIP1L | NM_015272    | 27 | 26 | 15          | 453         | 910  | 43659  | 95,74  | 99,6                   |
| chr16 | 53690303 | 53690512 | RPGRIP1L | NM_015272    | 27 | 26 | 14          | 118         | 373  | 16817  | 80,08  | 100                    |
| chr16 | 53691339 | 53691524 | RPGRIP1L | NM_015272    | 27 | 26 | 13          | 180         | 148  | 6544   | 35,18  | 88,9                   |
| chr16 | 53692229 | 53692408 | RPGRIP1L | NM_015272    | 27 | 26 | 12          | 51          | 521  | 21909  | 121,72 | 100                    |
| chr16 | 53692702 | 53692905 | RPGRIP1L | NM_015272    | 27 | 26 | 11          | 107         | 351  | 13715  | 67,23  | 83,2                   |
| chr16 | 53698676 | 53698891 | RPGRIP1L | NM_015272    | 27 | 26 | 10          | 140         | 418  | 17680  | 81,85  | 78,6                   |
| chr16 | 53705295 | 53705498 | RPGRIP1L | NM_015272    | 27 | 26 | 9           | 74          | 196  | 7664   | 37,57  | 100                    |
| chr16 | 53706733 | 53706927 | RPGRIP1L | NM_015272    | 27 | 26 | 8           | 147         | 192  | 8371   | 42,93  | 99,3                   |
| chr16 | 53708920 | 53709108 | RPGRIP1L | NM_015272    | 27 | 26 | 7           | 106         | 139  | 6152   | 32,55  | 100                    |
| chr16 | 53720340 | 53720531 | RPGRIP1L | NM_015272    | 27 | 26 | 6           | 144         | 404  | 17601  | 91,67  | 100                    |
| chr16 | 53721737 | 53721910 | RPGRIP1L | NM_015272    | 27 | 26 | 5           | 103         | 128  | 5560   | 31,95  | 100                    |
| chr16 | 53725967 | 53726333 | RPGRIP1L | NM_015272    | 27 | 26 | 4           | 299         | 1247 | 59466  | 162,03 | 100                    |
| chr16 | 53730052 | 53730270 | RPGRIP1L | NM_015272    | 27 | 26 | 3           | 145         | 463  | 22454  | 102,53 | 100                    |
| chr16 | 53734492 | 53734683 | RPGRIP1L | NM_015272    | 27 | 26 | 2           | 85          | 190  | 8415   | 43,83  | 100                    |
| chr16 | 56518622 | 56518825 | BBS2     | NM_031885    | 17 | 17 | 17          | 107         | 878  | 37528  | 183,96 | 100                    |
| chr16 | 56519415 | 56519603 | BBS2     | NM_031885    | 17 | 17 | 16          | 149         | 390  | 15770  | 83,44  | 68,5                   |
| chr16 | 56530783 | 56530983 | BBS2     | NM_031885    | 17 | 17 | 15          | 113         | 1819 | 80775  | 401,87 | 92,9                   |
| chr16 | 56531608 | 56531781 | BBS2     | NM_031885    | 17 | 17 | 14          | 138         | 707  | 29385  | 168,88 | 92                     |
| chr16 | 56532317 | 56532511 | BBS2     | NM_031885    | 17 | 17 | 13          | 132         | 418  | 19106  | 97,98  | 100                    |
| chr16 | 56533639 | 56533869 | BBS2     | NM_031885    | 17 | 17 | 12          | 130         | 331  | 14144  | 61,23  | 100                    |
| chr16 | 56534793 | 56534972 | BBS2     | NM_031885    | 17 | 17 | 11          | 172         | 151  | 6617   | 36,76  | 84,3                   |
| chr16 | 56535188 | 56535364 | BBS2     | NM_031885    | 17 | 17 | 10          | 145         | 256  | 11562  | 65,32  | 69                     |

|       |          |          |       |           |    |    |       |         |      |       |        |             |
|-------|----------|----------|-------|-----------|----|----|-------|---------|------|-------|--------|-------------|
| chr16 | 56536138 | 56536326 | BBS2  | NM_031885 | 17 | 17 | 9     | 140     | 1840 | 82593 | 437    | 70          |
| chr16 | 56536555 | 56536755 | BBS2  | NM_031885 | 17 | 17 | 8     | 136     | 618  | 25919 | 128,95 | 100         |
| chr16 | 56539885 | 56540171 | BBS2  | NM_031885 | 17 | 17 | 7,6   | 87.105  | 650  | 28745 | 100,16 | 73.6,100.0  |
| chr16 | 56543792 | 56543977 | BBS2  | NM_031885 | 17 | 17 | 5     | 78      | 569  | 25675 | 138,04 | 100         |
| chr16 | 56544701 | 56544889 | BBS2  | NM_031885 | 17 | 17 | 4     | 63      | 811  | 36135 | 191,19 | 100         |
| chr16 | 56545033 | 56545239 | BBS2  | NM_031885 | 17 | 17 | 3     | 126     | 436  | 19119 | 92,36  | 100         |
| chr16 | 56548341 | 56548627 | BBS2  | NM_031885 | 17 | 17 | 2     | 228     | 959  | 45174 | 157,4  | 100         |
| chr16 | 56553654 | 56553830 | BBS2  | NM_031885 | 17 | 17 | 1     | 117     | 38   | 1432  | 8,09   | 100         |
| chr16 | 57918036 | 57918304 | CNGB1 | NM_001297 | 33 | 32 | 33    | 294     | 305  | 11623 | 43,21  | 80,6        |
| chr16 | 57921662 | 57921963 | CNGB1 | NM_001297 | 33 | 32 | 32    | 220     | 1165 | 52728 | 174,6  | 93,2        |
| chr16 | 57931225 | 57931398 | CNGB1 | NM_001297 | 33 | 32 | 31    | 147     | 336  | 14345 | 82,44  | 66,7        |
| chr16 | 57931685 | 57931888 | CNGB1 | NM_001297 | 33 | 32 | 30    | 119     | 702  | 30539 | 149,7  | 100         |
| chr16 | 57935261 | 57935538 | CNGB1 | NM_001297 | 33 | 32 | 29,28 | 84,98   | 901  | 41473 | 149,18 | 94.0,100.0  |
| chr16 | 57937711 | 57937905 | CNGB1 | NM_001297 | 33 | 32 | 27    | 160     | 405  | 17217 | 88,29  | 100         |
| chr16 | 57938602 | 57938796 | CNGB1 | NM_001297 | 33 | 32 | 26    | 142     | 381  | 16026 | 82,18  | 100         |
| chr16 | 57945644 | 57945838 | CNGB1 | NM_001297 | 33 | 32 | 25    | 123     | 216  | 9214  | 47,25  | 100         |
| chr16 | 57946708 | 57946890 | CNGB1 | NM_001297 | 33 | 32 | 24    | 65      | 202  | 6966  | 38,07  | 87,7        |
| chr16 | 57949152 | 57949370 | CNGB1 | NM_001297 | 33 | 32 | 23    | 87      | 135  | 5787  | 26,42  | 100         |
| chr16 | 57950032 | 57950205 | CNGB1 | NM_001297 | 33 | 32 | 22    | 51      | 519  | 20493 | 117,78 | 100         |
| chr16 | 57951160 | 57951339 | CNGB1 | NM_001297 | 33 | 32 | 21    | 209     | 247  | 10376 | 57,64  | 80,4        |
| chr16 | 57952947 | 57953147 | CNGB1 | NM_001297 | 33 | 32 | 20    | 156     | 540  | 22860 | 113,73 | 92,9        |
| chr16 | 57954251 | 57954427 | CNGB1 | NM_001297 | 33 | 32 | 19    | 158     | 450  | 19497 | 110,15 | 86,7        |
| chr16 | 57957202 | 57957396 | CNGB1 | NM_001297 | 33 | 32 | 18    | 108     | 177  | 7153  | 36,68  | 76,9        |
| chr16 | 57965546 | 57965752 | CNGB1 | NM_001297 | 33 | 32 | 17    | 163     | 945  | 41230 | 199,18 | 81,6        |
| chr16 | 57973389 | 57973589 | CNGB1 | NM_001297 | 33 | 32 | 16    | 163     | 572  | 25256 | 125,65 | 66,3        |
| chr16 | 57974030 | 57974224 | CNGB1 | NM_001297 | 33 | 32 | 15    | 88      | 703  | 29614 | 151,87 | 98,9        |
| chr16 | 57983274 | 57983474 | CNGB1 | NM_001297 | 33 | 32 | 14    | 87      | 262  | 9503  | 47,28  | 80,5        |
| chr16 | 57984201 | 57984410 | CNGB1 | NM_001297 | 33 | 32 | 13    | 160     | 266  | 11960 | 56,95  | 78,8        |
| chr16 | 57991144 | 57991317 | CNGB1 | NM_001297 | 33 | 32 | 12    | 37      | 451  | 19809 | 113,84 | 100         |
| chr16 | 57992323 | 57992508 | CNGB1 | NM_001297 | 33 | 32 | 11    | 76      | 82   | 3347  | 17,99  | 88,2        |
| chr16 | 57993708 | 57993905 | CNGB1 | NM_001297 | 33 | 32 | 10    | 178     | 45   | 1932  | 9,76   | 64          |
| chr16 | 57994342 | 57994524 | CNGB1 | NM_001297 | 33 | 32 | 9     | 49      | 230  | 10377 | 56,7   | 100         |
| chr16 | 57994693 | 57994866 | CNGB1 | NM_001297 | 33 | 32 | 8     | 76      | 86   | 3538  | 20,33  | 100         |
| chr16 | 57996460 | 57996645 | CNGB1 | NM_001297 | 33 | 32 | 7     | 46      | 111  | 4651  | 25,01  | 100         |
| chr16 | 57996713 | 57996990 | CNGB1 | NM_001297 | 33 | 32 | 6,5   | 31,91   | 221  | 9923  | 35,69  | 100.0,100.0 |
| chr16 | 57998005 | 57998193 | CNGB1 | NM_001297 | 33 | 32 | 4     | 73      | 171  | 7452  | 39,43  | 100         |
| chr16 | 57998385 | 57998585 | CNGB1 | NM_001297 | 33 | 32 | 3     | 58      | 661  | 28172 | 140,16 | 100         |
| chr16 | 58001088 | 58001288 | CNGB1 | NM_001297 | 33 | 32 | 2     | 159     | 491  | 20281 | 100,9  | 64,8        |
| chr16 | 68679564 | 68679764 | CDH3  | NM_001793 | 16 | 16 | 2     | 115     | 3    | 145   | 0,72   | 78,3        |
| chr16 | 68710233 | 68710433 | CDH3  | NM_001793 | 16 | 16 | 3     | 86      | 2182 | 97042 | 482,8  | 100         |
| chr16 | 68711954 | 68712133 | CDH3  | NM_001793 | 16 | 16 | 4     | 144     | 249  | 11054 | 61,41  | 67,4        |
| chr16 | 68712329 | 68712766 | CDH3  | NM_001793 | 16 | 16 | 5,6   | 156.145 | 855  | 39499 | 90,18  | 100.0,70.3  |
| chr16 | 68713614 | 68713826 | CDH3  | NM_001793 | 16 | 16 | 7     | 176     | 481  | 20850 | 97,89  | 71          |
| chr16 | 68714885 | 68715094 | CDH3  | NM_001793 | 16 | 16 | 8     | 129     | 733  | 30607 | 145,75 | 89,1        |
| chr16 | 68716152 | 68716379 | CDH3  | NM_001793 | 16 | 16 | 9     | 186     | 373  | 15501 | 67,99  | 94,1        |
| chr16 | 68718394 | 68718698 | CDH3  | NM_001793 | 16 | 16 | 10    | 242     | 1155 | 52920 | 173,51 | 88          |
| chr16 | 68719047 | 68719259 | CDH3  | NM_001793 | 16 | 16 | 11    | 146     | 316  | 13959 | 65,54  | 100         |
| chr16 | 68721341 | 68721615 | CDH3  | NM_001793 | 16 | 16 | 12    | 225     | 1450 | 63121 | 229,53 | 89,3        |
| chr16 | 68725553 | 68725765 | CDH3  | NM_001793 | 16 | 16 | 13    | 207     | 719  | 30713 | 144,19 | 69,1        |
| chr16 | 68729101 | 68729292 | CDH3  | NM_001793 | 16 | 16 | 14    | 131     | 337  | 15276 | 79,56  | 100         |
| chr16 | 68729724 | 68729912 | CDH3  | NM_001793 | 16 | 16 | 15    | 147     | 482  | 20279 | 107,3  | 70,1        |
| chr16 | 68732043 | 68732418 | CDH3  | NM_001793 | 16 | 16 | 16    | 210     | 307  | 13855 | 36,85  | 100         |
| chr16 | 72129957 | 72130329 | DHX38 | NM_014003 | 27 | 26 | 2     | 323     | 279  | 13061 | 35,02  | 84,5        |
| chr16 | 72130771 | 72130962 | DHX38 | NM_014003 | 27 | 26 | 3     | 188     | 48   | 2346  | 12,22  | 73,4        |



|       |          |          |         |              |    |    |             |                 |      |        |        |                        |
|-------|----------|----------|---------|--------------|----|----|-------------|-----------------|------|--------|--------|------------------------|
| chr16 | 72131473 | 72131652 | DHX38   | NM_014003    | 27 | 26 | 4           | 105             | 251  | 11204  | 62,24  | 73,3                   |
| chr16 | 72132446 | 72133141 | DHX38   | NM_014003    | 27 | 26 | 5,6,7       | 148,119,77      | 1028 | 47779  | 68,65  | 100.0,100.0,50.6       |
| chr16 | 72133665 | 72133856 | DHX38   | NM_014003    | 27 | 26 | 8           | 156             | 197  | 8337   | 43,42  | 78,2                   |
| chr16 | 72134249 | 72134455 | DHX38   | NM_014003    | 27 | 26 | 9           | 162             | 215  | 8908   | 43,03  | 74,7                   |
| chr16 | 72135013 | 72135204 | DHX38   | NM_014003    | 27 | 26 | 10          | 108             | 450  | 18704  | 97,42  | 74,1                   |
| chr16 | 72135294 | 72135494 | DHX38   | NM_014003    | 27 | 26 | 11          | 113             | 461  | 20170  | 100,35 | 85                     |
| chr16 | 72136920 | 72137117 | DHX38   | NM_014003    | 27 | 26 | 12          | 138             | 195  | 8074   | 40,78  | 100                    |
| chr16 | 72137484 | 72137980 | DHX38   | NM_014003    | 27 | 26 | 13,14       | 187.186         | 948  | 42692  | 85,9   | 100.0,73.1             |
| chr16 | 72138399 | 72138575 | DHX38   | NM_014003    | 27 | 26 | 15          | 141             | 1240 | 51044  | 288,38 | 90,1                   |
| chr16 | 72138993 | 72139575 | DHX38   | NM_014003    | 27 | 26 | 16,17,18    | 111.117.108     | 1727 | 81751  | 140,22 | 39.6,100.0,100.0       |
| chr16 | 72139832 | 72140020 | DHX38   | NM_014003    | 27 | 26 | 19          | 113             | 180  | 7769   | 41,11  | 100                    |
| chr16 | 72141145 | 72141668 | DHX38   | NM_014003    | 27 | 26 | 20,21       | 209.155         | 1044 | 49176  | 93,85  | 100.0,80.6             |
| chr16 | 72142080 | 72142505 | DHX38   | NM_014003    | 27 | 26 | 22,23       | 156.135         | 624  | 29565  | 69,4   | 100.0,99.3             |
| chr16 | 72142736 | 72142906 | DHX38   | NM_014003    | 27 | 26 | 24          | 126             | 592  | 23781  | 139,07 | 70,6                   |
| chr16 | 72143312 | 72143527 | DHX38   | NM_014003    | 27 | 26 | 25          | 96              | 231  | 10246  | 47,44  | 100                    |
| chr16 | 72144755 | 72144952 | DHX38   | NM_014003    | 27 | 26 | 26          | 122             | 171  | 7507   | 37,91  | 80,3                   |
| chr16 | 72146375 | 72146495 | DHX38   | NM_014003    | 27 | 26 | 27          | 85              | 64   | 2377   | 19,64  | 25,9                   |
| chr17 | 1554014  | 1555023  | PRPF8   | NM_006445    | 43 | 42 | 43,42,41,40 | 155.203.140.141 | 3262 | 157247 | 155,69 | 100.0,100.0,100.0,58.2 |
| chr17 | 1556776  | 1557308  | PRPF8   | NM_006445    | 43 | 42 | 39,38       | 142.240         | 2993 | 141863 | 266,16 | 100.0,99.2             |
| chr17 | 1558643  | 1558855  | PRPF8   | NM_006445    | 43 | 42 | 37          | 194             | 491  | 21327  | 100,13 | 100                    |
| chr17 | 1559621  | 1559981  | PRPF8   | NM_006445    | 43 | 42 | 36,35       | 174.114         | 2182 | 93569  | 259,19 | 100.0,35.1             |
| chr17 | 1561583  | 1562088  | PRPF8   | NM_006445    | 43 | 42 | 34,33       | 129.238         | 2245 | 106932 | 211,33 | 72.1,100.0             |
| chr17 | 1562703  | 1562918  | PRPF8   | NM_006445    | 43 | 42 | 32          | 192             | 142  | 5748   | 26,61  | 72,9                   |
| chr17 | 1563159  | 1563347  | PRPF8   | NM_006445    | 43 | 42 | 31          | 161             | 255  | 10657  | 56,39  | 85,1                   |
| chr17 | 1563730  | 1564745  | PRPF8   | NM_006445    | 43 | 42 | 30,29,28,27 | 147.130.170.136 | 4110 | 194083 | 191,03 | 97.3,100.0,100.0,100.0 |
| chr17 | 1564950  | 1565529  | PRPF8   | NM_006445    | 43 | 42 | 26,25       | 180.248         | 1142 | 53346  | 91,98  | 75.0,100.0             |
| chr17 | 1576423  | 1577260  | PRPF8   | NM_006445    | 43 | 42 | 24,23,22    | 117.211.147     | 3473 | 167719 | 200,14 | 59.0,100.0,100.0       |
| chr17 | 1577789  | 1578069  | PRPF8   | NM_006445    | 43 | 42 | 21          | 239             | 433  | 19095  | 67,95  | 77,8                   |
| chr17 | 1578445  | 1578642  | PRPF8   | NM_006445    | 43 | 42 | 20          | 188             | 658  | 27454  | 138,66 | 100                    |
| chr17 | 1578922  | 1579984  | PRPF8   | NM_006445    | 43 | 42 | 19,18,17,16 | 193.127.164.207 | 4136 | 200049 | 188,19 | 95.9,100.0,100.0,89.9  |
| chr17 | 1580324  | 1580521  | PRPF8   | NM_006445    | 43 | 42 | 15          | 197             | 953  | 39258  | 198,27 | 72,6                   |
| chr17 | 1580898  | 1581098  | PRPF8   | NM_006445    | 43 | 42 | 14          | 130             | 117  | 4688   | 23,32  | 70                     |
| chr17 | 1581746  | 1582642  | PRPF8   | NM_006445    | 43 | 42 | 13,12,11,10 | 135.120.190.120 | 3598 | 166586 | 185,71 | 100.0,100.0,100.0,48.3 |
| chr17 | 1582969  | 1583160  | PRPF8   | NM_006445    | 43 | 42 | 9           | 191             | 308  | 13218  | 68,84  | 65,4                   |
| chr17 | 1584015  | 1584363  | PRPF8   | NM_006445    | 43 | 42 | 8,7         | 106.126         | 608  | 28806  | 82,54  | 100.0,100.0            |
| chr17 | 1584702  | 1585524  | PRPF8   | NM_006445    | 43 | 42 | 6,5,4       | 213.219.165     | 6241 | 294571 | 357,92 | 100.0,100.0,61.8       |
| chr17 | 1586774  | 1586980  | PRPF8   | NM_006445    | 43 | 42 | 3           | 169             | 320  | 13755  | 66,45  | 91,1                   |
| chr17 | 1587788  | 1587964  | PRPF8   | NM_006445    | 43 | 42 | 2           | 100             | 24   | 897    | 5,07   | 78                     |
| chr17 | 6328679  | 6329119  | AIPL1   | NM_014336    | 6  | 6  | 6           | 371             | 676  | 31971  | 72,5   | 91,6                   |
| chr17 | 6329927  | 6330435  | AIPL1   | NM_014336    | 6  | 6  | 5,4         | 142.177         | 737  | 34765  | 68,3   | 100.0,100.0            |
| chr17 | 6331652  | 6331861  | AIPL1   | NM_014336    | 6  | 6  | 3           | 189             | 435  | 18600  | 88,57  | 92,6                   |
| chr17 | 6337300  | 6337485  | AIPL1   | NM_014336    | 6  | 6  | 2           | 180             | 899  | 37534  | 201,8  | 66,1                   |
| chr17 | 6338320  | 6338490  | AIPL1   | NM_014336    | 6  | 6  | 1           | 96              | 376  | 16144  | 94,41  | 100                    |
| chr17 | 6358523  | 6358963  | PITPNM3 | NM_001165966 | 19 | 19 | 19          | 306             | 69   | 2807   | 6,37   | 100                    |
| chr17 | 6360817  | 6361032  | PITPNM3 | NM_001165966 | 19 | 19 | 18          | 129             | 199  | 7967   | 36,88  | 92,2                   |
| chr17 | 6364738  | 6364941  | PITPNM3 | NM_001165966 | 19 | 19 | 17          | 184             | 454  | 21177  | 103,81 | 75,5                   |
| chr17 | 6366951  | 6367154  | PITPNM3 | NM_001165966 | 19 | 19 | 16          | 150             | 513  | 21753  | 106,63 | 68,7                   |
| chr17 | 6367394  | 6367603  | PITPNM3 | NM_001165966 | 19 | 19 | 15          | 149             | 674  | 29417  | 140,08 | 76,5                   |
| chr17 | 6367992  | 6368204  | PITPNM3 | NM_001165966 | 19 | 19 | 14          | 117             | 386  | 16947  | 79,56  | 85,5                   |
| chr17 | 6371544  | 6371744  | PITPNM3 | NM_001165966 | 19 | 19 | 13          | 117             | 220  | 10431  | 51,9   | 100                    |
| chr17 | 6373613  | 6373810  | PITPNM3 | NM_001165966 | 19 | 19 | 12          | 149             | 85   | 3497   | 17,66  | 77,9                   |
| chr17 | 6374504  | 6374722  | PITPNM3 | NM_001165966 | 19 | 19 | 11          | 195             | 15   | 653    | 2,98   | 88,2                   |
| chr17 | 6376000  | 6376191  | PITPNM3 | NM_001165966 | 19 | 19 | 10          | 171             | 44   | 1824   | 9,5    | 86,5                   |
| chr17 | 6377803  | 6378009  | PITPNM3 | NM_001165966 | 19 | 19 | 9           | 173             | 19   | 812    | 3,92   | 70,5                   |

|       |          |          |         |              |    |    |             |                |       |        |        |                         |
|-------|----------|----------|---------|--------------|----|----|-------------|----------------|-------|--------|--------|-------------------------|
| chr17 | 6380373  | 6380573  | PITPNM3 | NM_001165966 | 19 | 19 | 8           | 185            | 164   | 7024   | 34,95  | 87                      |
| chr17 | 6381315  | 6381527  | PITPNM3 | NM_001165966 | 19 | 19 | 7           | 123            | 50    | 1926   | 9,04   | 83,7                    |
| chr17 | 6381789  | 6381992  | PITPNM3 | NM_001165966 | 19 | 19 | 6           | 190            | 196   | 8216   | 40,27  | 66,3                    |
| chr17 | 6386757  | 6387049  | PITPNM3 | NM_001165966 | 19 | 19 | 5           | 236            | 587   | 27790  | 94,85  | 90,3                    |
| chr17 | 6387542  | 6387742  | PITPNM3 | NM_001165966 | 19 | 19 | 4           | 77             | 386   | 16314  | 81,16  | 92,2                    |
| chr17 | 6406833  | 6407018  | PITPNM3 | NM_001165966 | 19 | 19 | 3           | 48             | 196   | 8409   | 45,21  | 100                     |
| chr17 | 6441242  | 6441445  | PITPNM3 | NM_001165966 | 19 | 19 | 2           | 96             | 1010  | 43519  | 213,33 | 100                     |
| chr17 | 6459614  | 6459820  | PITPNM3 | NM_001165966 | 19 | 19 | 1           | 22             | 2     | 62     | 0,3    | 100                     |
| chr17 | 7906408  | 7907565  | GUCY2D  | NM_000180    | 20 | 18 | 2,3         | 721.305        | 325   | 15266  | 13,18  | 94,2,100,0              |
| chr17 | 7909604  | 7909961  | GUCY2D  | NM_000180    | 20 | 18 | 4           | 352            | 1102  | 47739  | 133,35 | 79,8                    |
| chr17 | 7910394  | 7910573  | GUCY2D  | NM_000180    | 20 | 18 | 5           | 85             | 64    | 2857   | 15,87  | 81,2                    |
| chr17 | 7910691  | 7910900  | GUCY2D  | NM_000180    | 20 | 18 | 6           | 103            | 382   | 15679  | 74,66  | 100                     |
| chr17 | 7911127  | 7911327  | GUCY2D  | NM_000180    | 20 | 18 | 7           | 102            | 1298  | 58278  | 289,94 | 77,5                    |
| chr17 | 7912697  | 7912891  | GUCY2D  | NM_000180    | 20 | 18 | 8           | 81             | 240   | 10304  | 52,84  | 84                      |
| chr17 | 7915363  | 7915880  | GUCY2D  | NM_000180    | 20 | 18 | 9,10        | 207.157        | 1358  | 61114  | 117,98 | 100,0,72,0              |
| chr17 | 7916443  | 7916658  | GUCY2D  | NM_000180    | 20 | 18 | 11          | 150            | 70    | 3002   | 13,9   | 85,3                    |
| chr17 | 7917228  | 7917431  | GUCY2D  | NM_000180    | 20 | 18 | 12          | 149            | 247   | 10385  | 50,91  | 79,9                    |
| chr17 | 7917890  | 7918339  | GUCY2D  | NM_000180    | 20 | 18 | 13,14       | 164.193        | 1933  | 86783  | 192,85 | 100,0,84,5              |
| chr17 | 7918572  | 7918769  | GUCY2D  | NM_000180    | 20 | 18 | 15          | 175            | 187   | 8285   | 41,84  | 70,9                    |
| chr17 | 7919027  | 7919855  | GUCY2D  | NM_000180    | 20 | 18 | 16,17,18,19 | 99,95,86,88    | 510   | 23879  | 28,8   | 100,0,100,0,100,0,100,0 |
| chr17 | 26874237 | 26875062 | UNC119  | NM_005148    | 5  | 5  | 5,4,3       | 113.173.103    | 1839  | 88056  | 106,61 | 100,0,100,0,44,7        |
| chr17 | 26875581 | 26875751 | UNC119  | NM_005148    | 5  | 5  | 2           | 114            | 142   | 6086   | 35,59  | 100                     |
| chr17 | 26879296 | 26879656 | UNC119  | NM_005148    | 5  | 5  | 1           | 220            | 6     | 241    | 0,67   | 100                     |
| chr17 | 27055808 | 27056011 | NEK8    | NM_178170    | 15 | 15 | 1           | 47             | 29    | 1242   | 6,09   | 100                     |
| chr17 | 27061042 | 27061218 | NEK8    | NM_178170    | 15 | 15 | 2           | 206            | 895   | 38035  | 214,89 | 80,1                    |
| chr17 | 27061699 | 27062000 | NEK8    | NM_178170    | 15 | 15 | 3           | 233            | 351   | 16554  | 54,81  | 90,6                    |
| chr17 | 27062163 | 27062354 | NEK8    | NM_178170    | 15 | 15 | 4           | 132            | 303   | 11842  | 61,68  | 73,5                    |
| chr17 | 27064236 | 27065248 | NEK8    | NM_178170    | 15 | 15 | 5,6,7,8     | 209,62,182,151 | 1862  | 85947  | 84,84  | 100,0,100,0,100,0,90,1  |
| chr17 | 27065551 | 27065760 | NEK8    | NM_178170    | 15 | 15 | 9           | 77             | 785   | 34276  | 163,22 | 93,5                    |
| chr17 | 27066117 | 27066335 | NEK8    | NM_178170    | 15 | 15 | 10          | 118            | 1148  | 47635  | 217,51 | 87,3                    |
| chr17 | 27067530 | 27067727 | NEK8    | NM_178170    | 15 | 15 | 11          | 151            | 674   | 29686  | 149,93 | 67,5                    |
| chr17 | 27067897 | 27068645 | NEK8    | NM_178170    | 15 | 15 | 12,13,14    | 164.159.159    | 1998  | 91901  | 122,7  | 65,2,100,0,100,0        |
| chr17 | 27068950 | 27069153 | NEK8    | NM_178170    | 15 | 15 | 15          | 29             | 1012  | 45083  | 221    | 100                     |
| chr17 | 36482254 | 36487482 | GPR179  | NM_001004334 | 11 | 11 | 11          | 5067           | 19669 | 957421 | 183,1  | 100                     |
| chr17 | 36489091 | 36489309 | GPR179  | NM_001004334 | 11 | 11 | 10          | 147            | 249   | 10647  | 48,62  | 100                     |
| chr17 | 36489816 | 36490028 | GPR179  | NM_001004334 | 11 | 11 | 9           | 106            | 257   | 11152  | 52,36  | 100                     |
| chr17 | 36490540 | 36490728 | GPR179  | NM_001004334 | 11 | 11 | 8           | 139            | 95    | 3998   | 21,15  | 100                     |
| chr17 | 36490843 | 36491111 | GPR179  | NM_001004334 | 11 | 11 | 7           | 239            | 342   | 15679  | 58,29  | 82                      |
| chr17 | 36491470 | 36491670 | GPR179  | NM_001004334 | 11 | 11 | 6           | 110            | 210   | 8709   | 43,33  | 100                     |
| chr17 | 36491958 | 36492143 | GPR179  | NM_001004334 | 11 | 11 | 5           | 69             | 270   | 12513  | 67,27  | 100                     |
| chr17 | 36492895 | 36493178 | GPR179  | NM_001004334 | 11 | 11 | 4           | 236            | 506   | 22979  | 80,91  | 85,6                    |
| chr17 | 36493534 | 36493722 | GPR179  | NM_001004334 | 11 | 11 | 3           | 88             | 283   | 12497  | 66,12  | 79,5                    |
| chr17 | 36495281 | 36495472 | GPR179  | NM_001004334 | 11 | 11 | 2           | 109            | 875   | 38217  | 199,05 | 100                     |
| chr17 | 36498816 | 36499644 | GPR179  | NM_001004334 | 11 | 11 | 1           | 794            | 2415  | 116136 | 140,09 | 96,5                    |
| chr17 | 56283306 | 56284001 | MKS1    | NM_001165927 | 18 | 18 | 18,17,16    | 92,98,83       | 2109  | 99597  | 143,1  | 100,0,100,0,100,0       |
| chr17 | 56284337 | 56284540 | MKS1    | NM_001165927 | 18 | 18 | 15          | 134            | 1244  | 57351  | 281,13 | 70,9                    |
| chr17 | 56285308 | 56285591 | MKS1    | NM_001165927 | 18 | 18 | 14,13       | 108,70         | 483   | 20950  | 73,77  | 50,9,100,0              |
| chr17 | 56285793 | 56286014 | MKS1    | NM_001165927 | 18 | 18 | 12          | 71             | 121   | 5544   | 24,97  | 100                     |
| chr17 | 56287901 | 56288092 | MKS1    | NM_001165927 | 18 | 18 | 11          | 66             | 284   | 11767  | 61,29  | 100                     |
| chr17 | 56288237 | 56288416 | MKS1    | NM_001165927 | 18 | 18 | 10          | 43             | 1431  | 58574  | 325,41 | 100                     |
| chr17 | 56289741 | 56289911 | MKS1    | NM_001165927 | 18 | 18 | 9           | 57             | 784   | 33311  | 194,8  | 96,5                    |
| chr17 | 56290371 | 56290571 | MKS1    | NM_001165927 | 18 | 18 | 8           | 109            | 469   | 20745  | 103,21 | 74,3                    |
| chr17 | 56291146 | 56291328 | MKS1    | NM_001165927 | 18 | 18 | 7           | 105            | 202   | 8720   | 47,65  | 81                      |
| chr17 | 56291508 | 56291732 | MKS1    | NM_001165927 | 18 | 18 | 6           | 129            | 452   | 19656  | 87,36  | 87,6                    |

|       |          |          |        |              |    |    |     |         |      |       |        |             |
|-------|----------|----------|--------|--------------|----|----|-----|---------|------|-------|--------|-------------|
| chr17 | 56291996 | 56292175 | MKS1   | NM_001165927 | 18 | 18 | 5   | 98      | 659  | 27867 | 154,82 | 75,5        |
| chr17 | 56293369 | 56293560 | MKS1   | NM_001165927 | 18 | 18 | 4   | 156     | 429  | 18520 | 96,46  | 71,8        |
| chr17 | 56294030 | 56294212 | MKS1   | NM_001165927 | 18 | 18 | 3   | 71      | 2046 | 87951 | 480,61 | 95,8        |
| chr17 | 56295890 | 56296117 | MKS1   | NM_001165927 | 18 | 18 | 2   | 110     | 315  | 13850 | 60,75  | 100         |
| chr17 | 56296564 | 56296915 | MKS1   | NM_001165927 | 18 | 18 | 1   | 50      | 398  | 17143 | 48,7   | 100         |
| chr17 | 58227291 | 58227488 | CA4    | NM_000717    | 8  | 8  | 1   | 58      | 15   | 573   | 2,89   | 100         |
| chr17 | 58232598 | 58232795 | CA4    | NM_000717    | 8  | 8  | 2   | 54      | 243  | 9737  | 49,18  | 100         |
| chr17 | 58233904 | 58234086 | CA4    | NM_000717    | 8  | 8  | 3   | 156     | 302  | 12314 | 67,29  | 100         |
| chr17 | 58234773 | 58235133 | CA4    | NM_000717    | 8  | 8  | 4,5 | 146,99  | 774  | 35282 | 97,73  | 100,0,83,8  |
| chr17 | 58235358 | 58235810 | CA4    | NM_000717    | 8  | 8  | 6,7 | 67,164  | 974  | 42797 | 94,47  | 100,0,100,0 |
| chr17 | 58236533 | 58236718 | CA4    | NM_000717    | 8  | 8  | 8   | 195     | 128  | 5682  | 30,55  | 65,6        |
| chr17 | 63133631 | 63133861 | RGS9   | NM_003835    | 19 | 19 | 1   | 57      | 212  | 8469  | 36,66  | 100         |
| chr17 | 63149442 | 63149612 | RGS9   | NM_003835    | 19 | 19 | 2   | 97      | 683  | 28423 | 166,22 | 75,3        |
| chr17 | 63154391 | 63154600 | RGS9   | NM_003835    | 19 | 19 | 3   | 51      | 390  | 17083 | 81,35  | 100         |
| chr17 | 63156354 | 63156554 | RGS9   | NM_003835    | 19 | 19 | 4   | 107     | 776  | 33144 | 164,9  | 97,2        |
| chr17 | 63156597 | 63156809 | RGS9   | NM_003835    | 19 | 19 | 5   | 52      | 1048 | 44346 | 208,2  | 100         |
| chr17 | 63156900 | 63157085 | RGS9   | NM_003835    | 19 | 19 | 6   | 59      | 374  | 15836 | 85,14  | 100         |
| chr17 | 63159038 | 63159241 | RGS9   | NM_003835    | 19 | 19 | 7   | 77      | 268  | 11514 | 56,44  | 100         |
| chr17 | 63164186 | 63164383 | RGS9   | NM_003835    | 19 | 19 | 8   | 82      | 126  | 5218  | 26,35  | 80,5        |
| chr17 | 63173755 | 63173943 | RGS9   | NM_003835    | 19 | 19 | 9   | 72      | 136  | 6087  | 32,21  | 100         |
| chr17 | 63185366 | 63185593 | RGS9   | NM_003835    | 19 | 19 | 10  | 30      | 365  | 14898 | 65,34  | 100         |
| chr17 | 63186271 | 63186483 | RGS9   | NM_003835    | 19 | 19 | 11  | 62      | 189  | 8498  | 39,9   | 100         |
| chr17 | 63189587 | 63189802 | RGS9   | NM_003835    | 19 | 19 | 12  | 114     | 266  | 11630 | 53,84  | 100         |
| chr17 | 63193276 | 63193476 | RGS9   | NM_003835    | 19 | 19 | 13  | 116     | 503  | 20835 | 103,66 | 72,4        |
| chr17 | 63198006 | 63198200 | RGS9   | NM_003835    | 19 | 19 | 14  | 88      | 382  | 15558 | 79,78  | 100         |
| chr17 | 63200309 | 63200515 | RGS9   | NM_003835    | 19 | 19 | 15  | 139     | 325  | 14464 | 69,87  | 79,9        |
| chr17 | 63203934 | 63204131 | RGS9   | NM_003835    | 19 | 19 | 16  | 86      | 420  | 17833 | 90,07  | 100         |
| chr17 | 63206663 | 63206863 | RGS9   | NM_003835    | 19 | 19 | 17  | 118     | 146  | 5659  | 28,15  | 51,7        |
| chr17 | 63221156 | 63221685 | RGS9   | NM_003835    | 19 | 19 | 18  | 485     | 618  | 27860 | 52,57  | 92,6        |
| chr17 | 63223298 | 63223483 | RGS9   | NM_003835    | 19 | 19 | 19  | 133     | 1056 | 45269 | 243,38 | 68,4        |
| chr17 | 72914114 | 72914287 | USH1G  | NM_173477    | 3  | 3  | 3   | 4       | 524  | 22356 | 128,48 | 100         |
| chr17 | 72915612 | 72916825 | USH1G  | NM_173477    | 3  | 3  | 2   | 1218    | 1165 | 54704 | 45,06  | 94,8        |
| chr17 | 72918929 | 72919132 | USH1G  | NM_173477    | 3  | 3  | 1   | 164     | 52   | 2298  | 11,26  | 78          |
| chr17 | 74536085 | 74536309 | PRCD   | NM_001077620 | 5  | 3  | 1   | 74      | 257  | 10428 | 46,35  | 100         |
| chr17 | 74536460 | 74536666 | PRCD   | NM_001077620 | 5  | 3  | 2   | 69      | 438  | 18904 | 91,32  | 100         |
| chr17 | 74538470 | 74538682 | PRCD   | NM_001077620 | 5  | 3  | 3   | 22      | 245  | 10716 | 50,31  | 100         |
| chr17 | 74539026 | 74539217 | PRCD   | NM_001077620 | 5  | 3  | 4   | 93      | 215  | 9786  | 50,97  | 100         |
| chr17 | 74539904 | 74540107 | PRCD   | NM_001077620 | 5  | 3  | 5   | 1574    | 611  | 26781 | 131,28 | 13          |
| chr17 | 74540369 | 74541479 | PRCD   | NM_001077620 | 5  | 3  | 5   | 1574    | 1362 | 65557 | 59,01  | 69,3        |
| chr17 | 79495477 | 79496474 | FSCN2  | NM_001077182 | 5  | 5  | 1   | 826     | 410  | 19058 | 19,1   | 100         |
| chr17 | 79502055 | 79502249 | FSCN2  | NM_001077182 | 5  | 5  | 2   | 157     | 975  | 40876 | 209,62 | 100         |
| chr17 | 79503072 | 79503263 | FSCN2  | NM_001077182 | 5  | 5  | 3   | 122     | 400  | 16195 | 84,35  | 75,4        |
| chr17 | 79503637 | 79504145 | FSCN2  | NM_001077182 | 5  | 5  | 4,5 | 240,206 | 139  | 6342  | 12,46  | 74,6,100,0  |
| chr17 | 79618002 | 79618214 | PDE6G  | NM_002602    | 4  | 3  | 4   | 77      | 178  | 8027  | 37,69  | 100         |
| chr17 | 79618621 | 79618821 | PDE6G  | NM_002602    | 4  | 3  | 3   | 41      | 337  | 15010 | 74,68  | 100         |
| chr17 | 79620130 | 79620318 | PDE6G  | NM_002602    | 4  | 3  | 2   | 146     | 215  | 9099  | 48,14  | 88,4        |
| chr17 | 79623536 | 79623715 | PDE6G  | NM_002602    | 4  | 3  | 1   | 85      | 78   | 3390  | 18,83  | 84,7        |
| chr19 | 3770631  | 3770997  | RAX2   | NM_032753    | 3  | 2  | 3   | 339     | 16   | 693   | 1,89   | 96,5        |
| chr19 | 3771463  | 3771811  | RAX2   | NM_032753    | 3  | 2  | 2   | 216     | 211  | 9130  | 26,16  | 100         |
| chr19 | 33167176 | 33167930 | RGS9BP | NM_207391    | 1  | 1  | 1   | 708     | 141  | 6034  | 7,99   | 99,2        |
| chr19 | 46032356 | 46032784 | OPA3   | NM_001017989 | 2  | 2  | 2   | 401     | 339  | 14732 | 34,34  | 89,5        |
| chr19 | 46087797 | 46087991 | OPA3   | NM_001017989 | 2  | 2  | 1   | 142     | 245  | 10844 | 55,61  | 78,2        |
| chr19 | 48337620 | 48337820 | CRX    | NM_000554    | 4  | 3  | 2   | 100     | 574  | 25596 | 127,34 | 100         |
| chr19 | 48339535 | 48339741 | CRX    | NM_000554    | 4  | 3  | 3   | 152     | 377  | 16298 | 78,73  | 77          |

|       |          |          |        |           |    |    |           |                    |      |        |        |                              |
|-------|----------|----------|--------|-----------|----|----|-----------|--------------------|------|--------|--------|------------------------------|
| chr19 | 48342626 | 48343300 | CRX    | NM_000554 | 4  | 3  | 4         | 648                | 1938 | 88386  | 130,94 | 92,4                         |
| chr19 | 54618682 | 54618802 | PRPF31 | NM_015629 | 14 | 13 | 1         | 388                | 262  | 9563   | 79,03  | 3,4                          |
| chr19 | 54621621 | 54622055 | PRPF31 | NM_015629 | 14 | 13 | 2,3       | 177,61             | 1402 | 63343  | 145,62 | 100.0,100.0                  |
| chr19 | 54625117 | 54625320 | PRPF31 | NM_015629 | 14 | 13 | 4         | 84                 | 1315 | 60589  | 297    | 97,6                         |
| chr19 | 54625800 | 54625985 | PRPF31 | NM_015629 | 14 | 13 | 5         | 98                 | 942  | 41688  | 224,13 | 100                          |
| chr19 | 54626764 | 54626955 | PRPF31 | NM_015629 | 14 | 13 | 6         | 107                | 753  | 33596  | 174,98 | 100                          |
| chr19 | 54627175 | 54627375 | PRPF31 | NM_015629 | 14 | 13 | 7         | 170                | 431  | 18951  | 94,28  | 72,4                         |
| chr19 | 54627811 | 54628017 | PRPF31 | NM_015629 | 14 | 13 | 8         | 158                | 143  | 6019   | 29,08  | 88,6                         |
| chr19 | 54629787 | 54629978 | PRPF31 | NM_015629 | 14 | 13 | 9         | 90                 | 1025 | 41739  | 217,39 | 84,4                         |
| chr19 | 54631404 | 54631761 | PRPF31 | NM_015629 | 14 | 13 | 10,11     | 128,73             | 1    | 41     | 0,11   | 100.0,100.0                  |
| chr19 | 54632348 | 54632708 | PRPF31 | NM_015629 | 14 | 13 | 12,13     | 129,99             | 61   | 2600   | 7,2    | 100.0,62.6                   |
| chr19 | 54634768 | 54634968 | PRPF31 | NM_015629 | 14 | 13 | 14        | 126                | 181  | 7934   | 39,47  | 76,2                         |
| chr20 | 2639271  | 2639545  | IDH3B  | NM_006899 | 12 | 12 | 12        | 87                 | 530  | 20889  | 75,96  | 100                          |
| chr20 | 2640119  | 2640369  | IDH3B  | NM_006899 | 12 | 12 | 11,10     | 61,95              | 2995 | 142511 | 567,77 | 100.0,26.3                   |
| chr20 | 2640693  | 2641708  | IDH3B  | NM_006899 | 12 | 12 | 9,8,7,6,5 | 147,103,134,133,61 | 5051 | 241511 | 237,71 | 88.4,100.0,100.0,100.0,100.0 |
| chr20 | 2644025  | 2644785  | IDH3B  | NM_006899 | 12 | 12 | 4,3,2     | 121,99,81          | 3252 | 153205 | 201,32 | 100.0,100.0,100.0            |
| chr20 | 3869713  | 3870390  | PANK2  | NM_153638 | 7  | 7  | 1         | 628                | 186  | 8803   | 12,98  | 100                          |
| chr20 | 3888568  | 3888943  | PANK2  | NM_153638 | 7  | 7  | 2         | 353                | 1069 | 51144  | 136,02 | 100                          |
| chr20 | 3891225  | 3891505  | PANK2  | NM_153638 | 7  | 7  | 3         | 254                | 977  | 42917  | 152,73 | 99,6                         |
| chr20 | 3893077  | 3893259  | PANK2  | NM_153638 | 7  | 7  | 4         | 177                | 430  | 19128  | 104,52 | 87,6                         |
| chr20 | 3897610  | 3897795  | PANK2  | NM_153638 | 7  | 7  | 5         | 124                | 272  | 11796  | 63,42  | 71                           |
| chr20 | 3899292  | 3899477  | PANK2  | NM_153638 | 7  | 7  | 6         | 126                | 473  | 20692  | 111,25 | 100                          |
| chr20 | 3903832  | 3904091  | PANK2  | NM_153638 | 7  | 7  | 7         | 51                 | 158  | 6788   | 26,11  | 100                          |
| chr20 | 10385836 | 10386332 | MKKS   | NM_018848 | 6  | 4  | 6         | 441                | 1098 | 52977  | 106,59 | 99,3                         |
| chr20 | 10388203 | 10388433 | MKKS   | NM_018848 | 6  | 4  | 5         | 111                | 676  | 29242  | 126,59 | 100                          |
| chr20 | 10389200 | 10389403 | MKKS   | NM_018848 | 6  | 4  | 4         | 176                | 557  | 24730  | 121,23 | 72,7                         |
| chr20 | 10393177 | 10394245 | MKKS   | NM_018848 | 6  | 4  | 3         | 985                | 3273 | 156948 | 146,82 | 100                          |
| chr20 | 25282833 | 25283303 | ABHD12 | NM_015600 | 13 | 13 | 12        | 128                | 46   | 1604   | 9,38   | 100                          |
| chr20 | 25284184 | 25284396 | ABHD12 | NM_015600 | 13 | 13 | 11        | 79                 | 224  | 9626   | 45,19  | 100                          |
| chr20 | 25287484 | 25287660 | ABHD12 | NM_015600 | 13 | 13 | 10        | 83                 | 208  | 8603   | 48,6   | 81,9                         |
| chr20 | 25288580 | 25288756 | ABHD12 | NM_015600 | 13 | 13 | 9         | 80                 | 302  | 13076  | 73,88  | 100                          |
| chr20 | 25289086 | 25289256 | ABHD12 | NM_015600 | 13 | 13 | 8         | 38                 | 96   | 3688   | 21,57  | 100                          |
| chr20 | 25290031 | 25290225 | ABHD12 | NM_015600 | 13 | 13 | 7         | 130                | 562  | 25155  | 129    | 100                          |
| chr20 | 25295540 | 25295731 | ABHD12 | NM_015600 | 13 | 13 | 6         | 46                 | 450  | 18906  | 98,47  | 100                          |
| chr20 | 25297571 | 25297759 | ABHD12 | NM_015600 | 13 | 13 | 5         | 31                 | 536  | 22502  | 119,06 | 100                          |
| chr20 | 25300785 | 25300997 | ABHD12 | NM_015600 | 13 | 13 | 4         | 120                | 132  | 5450   | 25,59  | 100                          |
| chr20 | 25303970 | 25304164 | ABHD12 | NM_015600 | 13 | 13 | 3         | 106                | 451  | 19886  | 101,98 | 91,5                         |
| chr20 | 25319851 | 25320066 | ABHD12 | NM_015600 | 13 | 13 | 2         | 125                | 270  | 12348  | 57,17  | 100                          |
| chr20 | 25371137 | 25371423 | ABHD12 | NM_015600 | 13 | 13 | 1         | 191                | 2    | 87     | 0,3    | 100                          |
| chr20 | 62612458 | 62612634 | PRPF6  | NM_012469 | 21 | 21 | 1         | 71                 | 411  | 18151  | 102,55 | 50,7                         |
| chr20 | 62614443 | 62614655 | PRPF6  | NM_012469 | 21 | 21 | 2         | 169                | 732  | 31431  | 147,56 | 74,6                         |
| chr20 | 62616152 | 62616373 | PRPF6  | NM_012469 | 21 | 21 | 3         | 119                | 63   | 2909   | 13,1   | 95,8                         |
| chr20 | 62624650 | 62624829 | PRPF6  | NM_012469 | 21 | 21 | 4         | 79                 | 158  | 6449   | 35,83  | 88,6                         |
| chr20 | 62626217 | 62626432 | PRPF6  | NM_012469 | 21 | 21 | 5         | 177                | 400  | 16705  | 77,34  | 92,7                         |
| chr20 | 62626600 | 62626794 | PRPF6  | NM_012469 | 21 | 21 | 6         | 156                | 230  | 9915   | 50,85  | 73,7                         |
| chr20 | 62630389 | 62630610 | PRPF6  | NM_012469 | 21 | 21 | 7         | 95                 | 139  | 5797   | 26,11  | 100                          |
| chr20 | 62630984 | 62631196 | PRPF6  | NM_012469 | 21 | 21 | 8         | 157                | 285  | 12689  | 59,57  | 82,2                         |
| chr20 | 62632413 | 62632619 | PRPF6  | NM_012469 | 21 | 21 | 9         | 163                | 424  | 18823  | 90,93  | 100                          |
| chr20 | 62641451 | 62641636 | PRPF6  | NM_012469 | 21 | 21 | 10        | 119                | 690  | 30966  | 166,48 | 70,6                         |
| chr20 | 62642609 | 62642892 | PRPF6  | NM_012469 | 21 | 21 | 11        | 219                | 579  | 26680  | 93,94  | 100                          |
| chr20 | 62647973 | 62648161 | PRPF6  | NM_012469 | 21 | 21 | 12        | 123                | 176  | 7200   | 38,1   | 69,9                         |
| chr20 | 62653995 | 62654198 | PRPF6  | NM_012469 | 21 | 21 | 13        | 122                | 836  | 35277  | 172,93 | 73                           |
| chr20 | 62655801 | 62656016 | PRPF6  | NM_012469 | 21 | 21 | 14        | 139                | 500  | 20081  | 92,97  | 78,4                         |
| chr20 | 62657194 | 62657385 | PRPF6  | NM_012469 | 21 | 21 | 15        | 120                | 346  | 14964  | 77,94  | 78,3                         |

|       |          |          |         |           |    |    |       |         |       |        |        |            |
|-------|----------|----------|---------|-----------|----|----|-------|---------|-------|--------|--------|------------|
| chr20 | 62658259 | 62658450 | PRPF6   | NM_012469 | 21 | 21 | 16    | 177     | 239   | 10378  | 54,05  | 65,5       |
| chr20 | 62658898 | 62659077 | PRPF6   | NM_012469 | 21 | 21 | 17    | 134     | 268   | 11515  | 63,97  | 91         |
| chr20 | 62659710 | 62659901 | PRPF6   | NM_012469 | 21 | 21 | 18    | 92      | 247   | 9937   | 51,76  | 77,2       |
| chr20 | 62660626 | 62660817 | PRPF6   | NM_012469 | 21 | 21 | 19    | 115     | 150   | 6270   | 32,66  | 76,5       |
| chr20 | 62663218 | 62663394 | PRPF6   | NM_012469 | 21 | 21 | 20    | 127     | 301   | 13324  | 75,28  | 97,6       |
| chr20 | 62664242 | 62664448 | PRPF6   | NM_012469 | 21 | 21 | 21    | 153     | 149   | 6519   | 31,49  | 68,6       |
| chr21 | 45749996 | 45750759 | C21orf2 | NM_004928 | 7  | 7  | 7,6   | 129,97  | 427   | 19234  | 25,18  | 100,0,55,7 |
| chr21 | 45751786 | 45751965 | C21orf2 | NM_004928 | 7  | 7  | 5     | 172     | 259   | 10371  | 57,62  | 65,1       |
| chr21 | 45752818 | 45753110 | C21orf2 | NM_004928 | 7  | 7  | 4     | 230     | 119   | 4432   | 15,13  | 84,8       |
| chr21 | 45755599 | 45755790 | C21orf2 | NM_004928 | 7  | 7  | 3     | 47      | 261   | 11124  | 57,94  | 100        |
| chr21 | 45757401 | 45757595 | C21orf2 | NM_004928 | 7  | 7  | 2     | 19      | 503   | 21777  | 111,68 | 100        |
| chr21 | 45758956 | 45759233 | C21orf2 | NM_004928 | 7  | 7  | 1     | 77      | 4     | 178    | 0,64   | 100        |
| chr22 | 33197907 | 33198178 | TIMP3   | NM_000362 | 5  | 5  | 1     | 121     | 33    | 1438   | 5,29   | 100        |
| chr22 | 33245412 | 33245615 | TIMP3   | NM_000362 | 5  | 5  | 2     | 83      | 332   | 13654  | 66,93  | 100        |
| chr22 | 33253137 | 33253331 | TIMP3   | NM_000362 | 5  | 5  | 3     | 112     | 294   | 11990  | 61,49  | 85,7       |
| chr22 | 33253910 | 33254098 | TIMP3   | NM_000362 | 5  | 5  | 4     | 122     | 2893  | 122410 | 647,67 | 77,9       |
| chr22 | 33255193 | 33255497 | TIMP3   | NM_000362 | 5  | 5  | 5     | 198     | 720   | 33493  | 109,81 | 86,9       |
| chrX  | 13753140 | 13753390 | OFD1    | NM_003611 | 23 | 23 | 1,2   | 12,99   | 476   | 21353  | 85,07  | 100,0,24,2 |
| chrX  | 13754641 | 13754871 | OFD1    | NM_003611 | 23 | 23 | 3     | 201     | 630   | 23345  | 101,06 | 78,1       |
| chrX  | 13756996 | 13757199 | OFD1    | NM_003611 | 23 | 23 | 4,5   | 69,31   | 85    | 3250   | 15,93  | 55,1,100,0 |
| chrX  | 13762560 | 13762757 | OFD1    | NM_003611 | 23 | 23 | 6     | 105     | 369   | 16035  | 80,98  | 75,2       |
| chrX  | 13764480 | 13764677 | OFD1    | NM_003611 | 23 | 23 | 7     | 137     | 430   | 18236  | 92,1   | 69,3       |
| chrX  | 13764930 | 13765100 | OFD1    | NM_003611 | 23 | 23 | 8     | 174     | 186   | 7282   | 42,58  | 82,2       |
| chrX  | 13769402 | 13769578 | OFD1    | NM_003611 | 23 | 23 | 10    | 120     | 136   | 5847   | 33,03  | 71,7       |
| chrX  | 13771520 | 13771690 | OFD1    | NM_003611 | 23 | 23 | 11    | 74      | 233   | 7796   | 45,59  | 55,4       |
| chrX  | 13773331 | 13773451 | OFD1    | NM_003611 | 23 | 23 | 12    | 92      | 62    | 2288   | 18,91  | 33,7       |
| chrX  | 13774846 | 13774966 | OFD1    | NM_003611 | 23 | 23 | 13    | 190     | 250   | 8447   | 69,81  | 21,6       |
| chrX  | 13775788 | 13775970 | OFD1    | NM_003611 | 23 | 23 | 14    | 131     | 143   | 6087   | 33,26  | 93,1       |
| chrX  | 13776363 | 13776536 | OFD1    | NM_003611 | 23 | 23 | 15    | 112     | 238   | 10198  | 58,61  | 72,3       |
| chrX  | 13778191 | 13778557 | OFD1    | NM_003611 | 23 | 23 | 16    | 606     | 797   | 36797  | 100,26 | 53,5       |
| chrX  | 13778671 | 13778791 | OFD1    | NM_003611 | 23 | 23 | 16    | 606     | 321   | 9447   | 78,07  | 20         |
| chrX  | 13779235 | 13779426 | OFD1    | NM_003611 | 23 | 23 | 17    | 127     | 457   | 17932  | 93,4   | 75,6       |
| chrX  | 13780487 | 13780657 | OFD1    | NM_003611 | 23 | 23 | 18    | 101     | 131   | 5549   | 32,45  | 76,2       |
| chrX  | 13781878 | 13782078 | OFD1    | NM_003611 | 23 | 23 | 19    | 111     | 292   | 12707  | 63,22  | 87,4       |
| chrX  | 13785379 | 13785499 | OFD1    | NM_003611 | 23 | 23 | 20    | 158     | 102   | 4344   | 35,9   | 15,8       |
| chrX  | 13786232 | 13786405 | OFD1    | NM_003611 | 23 | 23 | 21    | 171     | 239   | 9783   | 56,22  | 65,5       |
| chrX  | 13786710 | 13786907 | OFD1    | NM_003611 | 23 | 23 | 22    | 68      | 183   | 7340   | 37,07  | 100        |
| chrX  | 18660079 | 18660368 | RS1     | NM_000330 | 6  | 6  | 6     | 153     | 265   | 11052  | 38,11  | 100        |
| chrX  | 18662517 | 18662717 | RS1     | NM_000330 | 6  | 6  | 5     | 196     | 1123  | 49122  | 244,39 | 85,7       |
| chrX  | 18665353 | 18665544 | RS1     | NM_000330 | 6  | 6  | 4     | 142     | 223   | 9097   | 47,38  | 70,4       |
| chrX  | 18674650 | 18674856 | RS1     | NM_000330 | 6  | 6  | 3     | 106     | 410   | 17497  | 84,53  | 79,2       |
| chrX  | 18675738 | 18675947 | RS1     | NM_000330 | 6  | 6  | 2     | 26      | 198   | 8715   | 41,5   | 100        |
| chrX  | 18690096 | 18690326 | RS1     | NM_000330 | 6  | 6  | 1     | 52      | 390   | 16616  | 71,93  | 100        |
| chrX  | 38128818 | 38129178 | RPGR    | NM_000328 | 19 | 19 | 19    | 207     | 569   | 25342  | 70,2   | 100        |
| chrX  | 38132629 | 38132853 | RPGR    | NM_000328 | 19 | 19 | 18    | 92      | 219   | 9477   | 42,12  | 100        |
| chrX  | 38134330 | 38134545 | RPGR    | NM_000328 | 19 | 19 | 17    | 58      | 380   | 15528  | 71,89  | 100        |
| chrX  | 38135772 | 38135969 | RPGR    | NM_000328 | 19 | 19 | 16    | 186     | 760   | 33044  | 166,89 | 69,9       |
| chrX  | 38145625 | 38147268 | RPGR    | NM_000328 | 19 | 19 | 15,14 | 152.181 | 12557 | 612177 | 372,37 | 100,0,85,6 |
| chrX  | 38150072 | 38150281 | RPGR    | NM_000328 | 19 | 19 | 13    | 66      | 178   | 7386   | 35,17  | 100        |
| chrX  | 38150633 | 38150818 | RPGR    | NM_000328 | 19 | 19 | 12    | 92      | 123   | 5620   | 30,22  | 100        |
| chrX  | 38156562 | 38156741 | RPGR    | NM_000328 | 19 | 19 | 11    | 169     | 364   | 15469  | 85,94  | 85,2       |
| chrX  | 38158231 | 38158431 | RPGR    | NM_000328 | 19 | 19 | 10    | 186     | 594   | 24833  | 123,55 | 88,2       |
| chrX  | 38160476 | 38160649 | RPGR    | NM_000328 | 19 | 19 | 9     | 125     | 339   | 13369  | 76,83  | 100        |
| chrX  | 38163928 | 38164140 | RPGR    | NM_000328 | 19 | 19 | 8     | 156     | 365   | 15818  | 74,26  | 74,4       |

|      |          |          |         |           |    |    |             |              |      |       |        |                         |
|------|----------|----------|---------|-----------|----|----|-------------|--------------|------|-------|--------|-------------------------|
| chrX | 38169921 | 38170091 | RPGR    | NM_000328 | 19 | 19 | 7           | 159          | 305  | 12744 | 74,53  | 66,7                    |
| chrX | 38176540 | 38176740 | RPGR    | NM_000328 | 19 | 19 | 6           | 150          | 185  | 7543  | 37,53  | 100                     |
| chrX | 38178066 | 38178263 | RPGR    | NM_000328 | 19 | 19 | 5           | 159          | 973  | 41060 | 207,37 | 100                     |
| chrX | 38180177 | 38180368 | RPGR    | NM_000328 | 19 | 19 | 4           | 63           | 384  | 16288 | 84,83  | 100                     |
| chrX | 38182063 | 38182236 | RPGR    | NM_000328 | 19 | 19 | 3           | 93           | 672  | 27164 | 156,11 | 100                     |
| chrX | 38182689 | 38182889 | RPGR    | NM_000328 | 19 | 19 | 2           | 126          | 239  | 8865  | 44,1   | 70,6                    |
| chrX | 38186584 | 38186793 | RPGR    | NM_000328 | 19 | 19 | 1           | 28           | 55   | 2346  | 11,17  | 100                     |
| chrX | 41306973 | 41307259 | NYX     | NM_022567 | 2  | 2  | 1           | 37           | 686  | 31029 | 108,11 | 100                     |
| chrX | 41332787 | 41334249 | NYX     | NM_022567 | 2  | 2  | 2           | 1409         | 422  | 19724 | 13,48  | 96,9                    |
| chrX | 43808912 | 43809216 | NDP     | NM_000266 | 3  | 2  | 3           | 228          | 640  | 27466 | 90,05  | 75,4                    |
| chrX | 43817713 | 43817993 | NDP     | NM_000266 | 3  | 2  | 2           | 174          | 66   | 2648  | 9,42   | 100                     |
| chrX | 46696381 | 46696655 | RP2     | NM_006915 | 5  | 5  | 1           | 102          | 242  | 10829 | 39,38  | 100                     |
| chrX | 46712858 | 46713568 | RP2     | NM_006915 | 5  | 5  | 2           | 666          | 1364 | 64260 | 90,38  | 98,8                    |
| chrX | 46719400 | 46719594 | RP2     | NM_006915 | 5  | 5  | 3           | 115          | 756  | 31362 | 160,83 | 100                     |
| chrX | 46736849 | 46737046 | RP2     | NM_006915 | 5  | 5  | 4           | 86           | 253  | 11202 | 56,58  | 100                     |
| chrX | 46739100 | 46739353 | RP2     | NM_006915 | 5  | 5  | 5           | 84           | 156  | 7312  | 28,79  | 100                     |
| chrX | 49061561 | 49061927 | CACNA1F | NM_005183 | 48 | 48 | 48          | 231          | 638  | 29120 | 79,35  | 100                     |
| chrX | 49062125 | 49062337 | CACNA1F | NM_005183 | 48 | 48 | 47          | 198          | 47   | 1876  | 8,81   | 75,3                    |
| chrX | 49063020 | 49063617 | CACNA1F | NM_005183 | 48 | 48 | 46,45,44    | 113.128.108  | 1747 | 83166 | 139,07 | 57.5,100.0,100.0        |
| chrX | 49064887 | 49065265 | CACNA1F | NM_005183 | 48 | 48 | 43          | 170          | 1671 | 77436 | 204,32 | 100                     |
| chrX | 49065548 | 49065798 | CACNA1F | NM_005183 | 48 | 48 | 42          | 132          | 1078 | 44355 | 176,71 | 58,3                    |
| chrX | 49066081 | 49066512 | CACNA1F | NM_005183 | 48 | 48 | 41,40       | 131.102      | 1929 | 86030 | 199,14 | 100.0,100.0             |
| chrX | 49066765 | 49066962 | CACNA1F | NM_005183 | 48 | 48 | 39          | 103          | 220  | 9565  | 48,31  | 96,1                    |
| chrX | 49067072 | 49067242 | CACNA1F | NM_005183 | 48 | 48 | 38          | 97           | 487  | 20263 | 118,5  | 77,3                    |
| chrX | 49067433 | 49067615 | CACNA1F | NM_005183 | 48 | 48 | 37          | 128          | 304  | 12249 | 66,93  | 93,8                    |
| chrX | 49067794 | 49068006 | CACNA1F | NM_005183 | 48 | 48 | 36          | 160          | 885  | 39298 | 184,5  | 92,5                    |
| chrX | 49068348 | 49068575 | CACNA1F | NM_005183 | 48 | 48 | 35          | 92           | 489  | 21202 | 92,99  | 100                     |
| chrX | 49068635 | 49068838 | CACNA1F | NM_005183 | 48 | 48 | 34          | 66           | 166  | 7150  | 35,05  | 100                     |
| chrX | 49069038 | 49069407 | CACNA1F | NM_005183 | 48 | 48 | 33          | 129          | 499  | 23600 | 63,78  | 100                     |
| chrX | 49070259 | 49070435 | CACNA1F | NM_005183 | 48 | 48 | 31          | 84           | 479  | 20904 | 118,1  | 100                     |
| chrX | 49070615 | 49070794 | CACNA1F | NM_005183 | 48 | 48 | 30          | 111          | 312  | 12961 | 72,01  | 100                     |
| chrX | 49071484 | 49071998 | CACNA1F | NM_005183 | 48 | 48 | 29,28       | 159.202      | 1600 | 74388 | 144,44 | 100.0,97.5              |
| chrX | 49072808 | 49073014 | CACNA1F | NM_005183 | 48 | 48 | 27          | 147          | 277  | 11942 | 57,69  | 100                     |
| chrX | 49074123 | 49074403 | CACNA1F | NM_005183 | 48 | 48 | 26,25       | 53.108       | 957  | 40926 | 145,64 | 100.0,43.5              |
| chrX | 49074956 | 49075461 | CACNA1F | NM_005183 | 48 | 48 | 24,23,22    | 88,107,60    | 205  | 9547  | 18,87  | 52.3,100.0,100.0        |
| chrX | 49075688 | 49076199 | CACNA1F | NM_005183 | 48 | 48 | 21,20       | 130.157      | 1007 | 46537 | 90,89  | 100.0,68.2              |
| chrX | 49076920 | 49077102 | CACNA1F | NM_005183 | 48 | 48 | 19          | 52           | 70   | 3146  | 17,19  | 100                     |
| chrX | 49077386 | 49077601 | CACNA1F | NM_005183 | 48 | 48 | 18          | 46           | 433  | 19043 | 88,16  | 100                     |
| chrX | 49079008 | 49079614 | CACNA1F | NM_005183 | 48 | 48 | 17,16,15    | 82.121.208   | 913  | 43910 | 72,34  | 67.1,100.0,100.0        |
| chrX | 49081123 | 49081427 | CACNA1F | NM_005183 | 48 | 48 | 14          | 226          | 522  | 22409 | 73,47  | 90,7                    |
| chrX | 49082365 | 49083202 | CACNA1F | NM_005183 | 48 | 48 | 13,12,11,10 | 161,27,94,93 | 770  | 35471 | 42,33  | 100.0,100.0,100.0,100.0 |
| chrX | 49083459 | 49083653 | CACNA1F | NM_005183 | 48 | 48 | 9           | 191          | 559  | 23945 | 122,79 | 68,6                    |
| chrX | 49084411 | 49084857 | CACNA1F | NM_005183 | 48 | 48 | 8,7         | 104.197      | 930  | 42951 | 96,09  | 100.0,73.6              |
| chrX | 49086593 | 49087021 | CACNA1F | NM_005183 | 48 | 48 | 6,5         | 153.143      | 452  | 21330 | 49,72  | 100.0,65.0              |
| chrX | 49087320 | 49087511 | CACNA1F | NM_005183 | 48 | 48 | 4           | 140          | 239  | 10730 | 55,89  | 94,3                    |
| chrX | 49087658 | 49087846 | CACNA1F | NM_005183 | 48 | 48 | 3           | 106          | 387  | 16157 | 85,49  | 100                     |
| chrX | 49088193 | 49088479 | CACNA1F | NM_005183 | 48 | 48 | 2           | 250          | 206  | 7514  | 26,18  | 78,8                    |
| chrX | 49089681 | 49089872 | CACNA1F | NM_005183 | 48 | 48 | 1           | 25           | 616  | 27424 | 142,83 | 100                     |
| chrX | 85119546 | 85119823 | CHM     | NM_000390 | 15 | 15 | 15          | 192          | 697  | 30252 | 108,82 | 98,4                    |
| chrX | 85128006 | 85128215 | CHM     | NM_000390 | 15 | 15 | 14          | 161          | 631  | 28205 | 134,31 | 98,8                    |
| chrX | 85133858 | 85134055 | CHM     | NM_000390 | 15 | 15 | 13          | 99           | 230  | 9787  | 49,43  | 86,9                    |
| chrX | 85149140 | 85149325 | CHM     | NM_000390 | 15 | 15 | 12          | 97           | 624  | 25950 | 139,52 | 100                     |
| chrX | 85155627 | 85155812 | CHM     | NM_000390 | 15 | 15 | 11          | 64           | 270  | 11716 | 62,99  | 100                     |
| chrX | 85156001 | 85156210 | CHM     | NM_000390 | 15 | 15 | 10          | 105          | 236  | 10218 | 48,66  | 100                     |

|      |           |           |        |           |    |    |   |     |     |        |        |      |
|------|-----------|-----------|--------|-----------|----|----|---|-----|-----|--------|--------|------|
| chrX | 85166219  | 85166389  | CHM    | NM_000390 | 15 | 15 | 9 | 78  | 118 | 4972   | 29,08  | 100  |
| chrX | 85211079  | 85211350  | CHM    | NM_000390 | 15 | 15 | 8 | 226 | 470 | 21604  | 79,43  | 85,4 |
| chrX | 85212864  | 85213037  | CHM    | NM_000390 | 15 | 15 | 7 | 121 | 165 | 7030   | 40,4   | 96,7 |
| chrX | 85213772  | 85213948  | CHM    | NM_000390 | 15 | 15 | 6 | 117 | 643 | 27196  | 153,65 | 70,9 |
| chrX | 85218694  | 85219134  | CHM    | NM_000390 | 15 | 15 | 5 | 388 | 496 | 21636  | 49,06  | 93,8 |
| chrX | 85233747  | 85233935  | CHM    | NM_000390 | 15 | 15 | 4 | 125 | 563 | 24857  | 131,52 | 100  |
| chrX | 85236640  | 85236831  | CHM    | NM_000390 | 15 | 15 | 3 | 73  | 251 | 10008  | 52,13  | 100  |
| chrX | 85282463  | 85282672  | CHM    | NM_000390 | 15 | 15 | 2 | 67  | 348 | 14419  | 68,66  | 100  |
| chrX | 85302479  | 85302694  | CHM    | NM_000390 | 15 | 15 | 1 | 49  | 183 | 8533   | 39,5   | 100  |
| chrX | 100601604 | 100601724 | TIMM8A | NM_004085 | 2  | 2  | 2 | 162 | 216 | 8581   | 70,92  | 27,8 |
| chrX | 100603380 | 100603749 | TIMM8A | NM_004085 | 2  | 2  | 1 | 132 | 794 | 36315  | 98,15  | 100  |
|      |           |           |        |           |    |    |   |     |     | Median | 74,26  | 100  |

**S3 Table: List of the hearing impairment genes and coverage data.**

| Chromosome | Start position | End position | Gene name | Gene id   | Total exons | Total coding ex | Component nr | Exon size | reads | bps   | coverage | Overlap %        |
|------------|----------------|--------------|-----------|-----------|-------------|-----------------|--------------|-----------|-------|-------|----------|------------------|
| chr1       | 6484950        | 6485414      | ESPN      | NM_031475 | 13          | 13              | 1            | 294       | 19    | 699   | 1,5      | 100              |
| chr1       | 6488213        | 6488407      | ESPN      | NM_031475 | 13          | 13              | 2            | 194       | 147   | 6054  | 31,05    | 62,9             |
| chr1       | 6500461        | 6500581      | ESPN      | NM_031475 | 13          | 13              | 3            | 187       | 1     | 50    | 0,41     | 21,4             |
| chr1       | 6500610        | 6500730      | ESPN      | NM_031475 | 13          | 13              | 4            | 183       | 0     | 0     | 0        | 24,6             |
| chr1       | 6500839        | 6500957      | ESPN      | NM_031475 | 13          | 13              | 4            | 183       | 1     | 33    | 0,28     | 16,4             |
| chr1       | 6501105        | 6501225      | ESPN      | NM_031475 | 13          | 13              | 5            | 132       | 138   | 4076  | 33,69    | 15,9             |
| chr1       | 6504466        | 6504666      | ESPN      | NM_031475 | 13          | 13              | 6            | 202       | 333   | 14593 | 72,6     | 62,4             |
| chr1       | 6505644        | 6505764      | ESPN      | NM_031475 | 13          | 13              | 7            | 272       | 116   | 3961  | 32,74    | 15,1             |
| chr1       | 6508910        | 6509163      | ESPN      | NM_031475 | 13          | 13              | 8            | 451       | 3     | 133   | 0,52     | 53,7             |
| chr1       | 6511643        | 6511763      | ESPN      | NM_031475 | 13          | 13              | 9            | 146       | 49    | 1814  | 14,99    | 69,2             |
| chr1       | 6511818        | 6511938      | ESPN      | NM_031475 | 13          | 13              | 10           | 264       | 68    | 2603  | 21,51    | 17,4             |
| chr1       | 6511972        | 6512160      | ESPN      | NM_031475 | 13          | 13              | 10           | 264       | 283   | 10785 | 57,06    | 70,1             |
| chr1       | 6517282        | 6517452      | ESPN      | NM_031475 | 13          | 13              | 11,12        | 80,12     | 323   | 13999 | 81,87    | 52.5,100.0       |
| chr1       | 6520099        | 6520287      | ESPN      | NM_031475 | 13          | 13              | 13           | 148       | 66    | 2633  | 13,93    | 73               |
| chr1       | 35250289       | 35251224     | GJB3      | NM_024009 | 2           | 1               | 2            | 813       | 1984  | 94119 | 100,55   | 100              |
| chr1       | 41249737       | 41250168     | KCNQ4     | NM_004700 | 14          | 14              | 1            | 314       | 57    | 2571  | 5,95     | 100              |
| chr1       | 41282821       | 41283021     | KCNQ4     | NM_004700 | 14          | 14              | 2            | 91        | 872   | 35185 | 175,05   | 93,4             |
| chr1       | 41283756       | 41283956     | KCNQ4     | NM_004700 | 14          | 14              | 3            | 127       | 785   | 34994 | 174,1    | 95,3             |
| chr1       | 41284179       | 41284385     | KCNQ4     | NM_004700 | 14          | 14              | 4            | 176       | 36    | 1336  | 6,45     | 98,9             |
| chr1       | 41285014       | 41285208     | KCNQ4     | NM_004700 | 14          | 14              | 5            | 126       | 529   | 23206 | 119,01   | 100              |
| chr1       | 41285459       | 41285902     | KCNQ4     | NM_004700 | 14          | 14              | 6,7          | 111,96    | 2082  | 95114 | 214,22   | 100.0,68.8       |
| chr1       | 41287959       | 41288156     | KCNQ4     | NM_004700 | 14          | 14              | 8            | 89        | 245   | 10594 | 53,51    | 100              |
| chr1       | 41289809       | 41290024     | KCNQ4     | NM_004700 | 14          | 14              | 9            | 162       | 690   | 25137 | 116,38   | 75,3             |
| chr1       | 41296656       | 41296957     | KCNQ4     | NM_004700 | 14          | 14              | 10           | 221       | 211   | 9298  | 30,79    | 91,4             |
| chr1       | 41298566       | 41298790     | KCNQ4     | NM_004700 | 14          | 14              | 11           | 100       | 442   | 17878 | 79,46    | 100              |
| chr1       | 41300559       | 41300759     | KCNQ4     | NM_004700 | 14          | 14              | 12           | 132       | 93    | 3865  | 19,23    | 91,7             |
| chr1       | 41303229       | 41303438     | KCNQ4     | NM_004700 | 14          | 14              | 13           | 130       | 129   | 5295  | 25,21    | 78,5             |
| chr1       | 41304021       | 41304295     | KCNQ4     | NM_004700 | 14          | 14              | 14           | 213       | 509   | 22632 | 82,3     | 82,2             |
| chr1       | 55464778       | 55464978     | BSND      | NM_057176 | 4           | 4               | 1            | 177       | 308   | 12214 | 60,77    | 67,2             |
| chr1       | 55470608       | 55470796     | BSND      | NM_057176 | 4           | 4               | 2            | 95        | 466   | 20696 | 109,5    | 100              |
| chr1       | 55472715       | 55473004     | BSND      | NM_057176 | 4           | 4               | 3            | 276       | 286   | 12407 | 42,78    | 83,7             |
| chr1       | 55473820       | 55474325     | BSND      | NM_057176 | 4           | 4               | 4            | 415       | 1682  | 75947 | 150,09   | 100              |
| chr1       | 103343449      | 103343726    | COL11A1   | NM_001854 | 67          | 67              | 67           | 147       | 418   | 18499 | 66,54    | 100              |
| chr1       | 103345185      | 103345480    | COL11A1   | NM_001854 | 67          | 67              | 66           | 234       | 1108  | 48954 | 165,39   | 100              |
| chr1       | 103347189      | 103347371    | COL11A1   | NM_001854 | 67          | 67              | 65           | 69        | 201   | 8251  | 45,09    | 100              |
| chr1       | 103348683      | 103348874    | COL11A1   | NM_001854 | 67          | 67              | 64           | 113       | 222   | 9634  | 50,18    | 100              |
| chr1       | 103352392      | 103352657    | COL11A1   | NM_001854 | 67          | 67              | 63           | 250       | 743   | 34096 | 128,18   | 88,4             |
| chr1       | 103354171      | 103354552    | COL11A1   | NM_001854 | 67          | 67              | 62,61,60     | 54,36,54  | 451   | 21359 | 55,91    | 29.6,100.0,100.0 |
| chr1       | 103354949      | 103355170    | COL11A1   | NM_001854 | 67          | 67              | 59           | 108       | 501   | 21827 | 98,32    | 100              |
| chr1       | 103355939      | 103356130    | COL11A1   | NM_001854 | 67          | 67              | 58           | 54        | 125   | 5498  | 28,64    | 100              |
| chr1       | 103363613      | 103363795    | COL11A1   | NM_001854 | 67          | 67              | 57           | 54        | 19    | 766   | 4,19     | 100              |
| chr1       | 103364160      | 103364550    | COL11A1   | NM_001854 | 67          | 67              | 56,55        | 108,54    | 220   | 10636 | 27,2     | 100.0,100.0      |
| chr1       | 103377641      | 103377853    | COL11A1   | NM_001854 | 67          | 67              | 54           | 54        | 105   | 4355  | 20,45    | 100              |
| chr1       | 103379128      | 103379313    | COL11A1   | NM_001854 | 67          | 67              | 53           | 54        | 788   | 34257 | 184,18   | 100              |
| chr1       | 103379834      | 103380031    | COL11A1   | NM_001854 | 67          | 67              | 52           | 54        | 110   | 4972  | 25,11    | 100              |
| chr1       | 103380288      | 103380464    | COL11A1   | NM_001854 | 67          | 67              | 51           | 108       | 175   | 7488  | 42,31    | 74,1             |
| chr1       | 103381098      | 103381307    | COL11A1   | NM_001854 | 67          | 67              | 50           | 54        | 235   | 10498 | 49,99    | 100              |
| chr1       | 103385796      | 103385993    | COL11A1   | NM_001854 | 67          | 67              | 49           | 54        | 475   | 21385 | 108,01   | 100              |
| chr1       | 103387003      | 103387212    | COL11A1   | NM_001854 | 67          | 67              | 48           | 54        | 152   | 6998  | 33,32    | 100              |



|      |           |           |         |           |    |    |          |          |      |       |        |                   |
|------|-----------|-----------|---------|-----------|----|----|----------|----------|------|-------|--------|-------------------|
| chr1 | 103388815 | 103389009 | COL11A1 | NM_001854 | 67 | 67 | 47       | 54       | 679  | 27777 | 142,45 | 100               |
| chr1 | 103399943 | 103400173 | COL11A1 | NM_001854 | 67 | 67 | 46       | 108      | 643  | 28965 | 125,39 | 100               |
| chr1 | 103400518 | 103400703 | COL11A1 | NM_001854 | 67 | 67 | 45       | 54       | 236  | 10526 | 56,59  | 100               |
| chr1 | 103404526 | 103404717 | COL11A1 | NM_001854 | 67 | 67 | 44       | 54       | 694  | 30190 | 157,24 | 100               |
| chr1 | 103405821 | 103406051 | COL11A1 | NM_001854 | 67 | 67 | 43       | 108      | 754  | 32231 | 139,53 | 100               |
| chr1 | 103412343 | 103412573 | COL11A1 | NM_001854 | 67 | 67 | 42       | 108      | 212  | 8969  | 38,83  | 100               |
| chr1 | 103427318 | 103427518 | COL11A1 | NM_001854 | 67 | 67 | 41       | 54       | 327  | 14763 | 73,45  | 100               |
| chr1 | 103427673 | 103427879 | COL11A1 | NM_001854 | 67 | 67 | 40       | 90       | 316  | 13226 | 63,89  | 100               |
| chr1 | 103428147 | 103428377 | COL11A1 | NM_001854 | 67 | 67 | 39       | 108      | 237  | 10071 | 43,6   | 100               |
| chr1 | 103430957 | 103431181 | COL11A1 | NM_001854 | 67 | 67 | 38       | 54       | 209  | 9432  | 41,92  | 100               |
| chr1 | 103435686 | 103435898 | COL11A1 | NM_001854 | 67 | 67 | 37       | 54       | 465  | 20397 | 95,76  | 100               |
| chr1 | 103440309 | 103440524 | COL11A1 | NM_001854 | 67 | 67 | 36       | 54       | 293  | 12232 | 56,63  | 100               |
| chr1 | 103444217 | 103444663 | COL11A1 | NM_001854 | 67 | 67 | 35,34,33 | 45,54,45 | 487  | 21371 | 47,81  | 100,0,100,0,100,0 |
| chr1 | 103444854 | 103445134 | COL11A1 | NM_001854 | 67 | 67 | 32       | 54       | 519  | 24205 | 86,14  | 100               |
| chr1 | 103449635 | 103449811 | COL11A1 | NM_001854 | 67 | 67 | 31       | 54       | 162  | 6242  | 35,27  | 100               |
| chr1 | 103453115 | 103453324 | COL11A1 | NM_001854 | 67 | 67 | 30       | 108      | 706  | 28039 | 133,52 | 100               |
| chr1 | 103455063 | 103455272 | COL11A1 | NM_001854 | 67 | 67 | 29       | 54       | 537  | 24156 | 115,03 | 100               |
| chr1 | 103461474 | 103461677 | COL11A1 | NM_001854 | 67 | 67 | 27       | 54       | 73   | 3193  | 15,65  | 100               |
| chr1 | 103462566 | 103462745 | COL11A1 | NM_001854 | 67 | 67 | 26       | 45       | 926  | 37884 | 210,47 | 100               |
| chr1 | 103463801 | 103463983 | COL11A1 | NM_001854 | 67 | 67 | 25       | 54       | 123  | 4764  | 26,03  | 100               |
| chr1 | 103467342 | 103467539 | COL11A1 | NM_001854 | 67 | 67 | 24       | 45       | 1048 | 45791 | 231,27 | 100               |
| chr1 | 103467895 | 103468113 | COL11A1 | NM_001854 | 67 | 67 | 23       | 54       | 124  | 5331  | 24,34  | 100               |
| chr1 | 103468233 | 103468421 | COL11A1 | NM_001854 | 67 | 67 | 22       | 45       | 546  | 23084 | 122,14 | 100               |
| chr1 | 103468655 | 103468882 | COL11A1 | NM_001854 | 67 | 67 | 21       | 54       | 592  | 25396 | 111,39 | 100               |
| chr1 | 103469986 | 103470266 | COL11A1 | NM_001854 | 67 | 67 | 20,19    | 45,54    | 284  | 12334 | 43,89  | 100,0,100,0       |
| chr1 | 103471411 | 103471922 | COL11A1 | NM_001854 | 67 | 67 | 18,17,16 | 54,54,54 | 600  | 27597 | 53,9   | 68,5,100,0,100,0  |
| chr1 | 103473945 | 103474154 | COL11A1 | NM_001854 | 67 | 67 | 15       | 54       | 338  | 14625 | 69,64  | 100               |
| chr1 | 103477866 | 103478051 | COL11A1 | NM_001854 | 67 | 67 | 14       | 57       | 247  | 10799 | 58,06  | 100               |
| chr1 | 103479972 | 103480193 | COL11A1 | NM_001854 | 67 | 67 | 13       | 84       | 583  | 25505 | 114,89 | 100               |
| chr1 | 103481160 | 103481360 | COL11A1 | NM_001854 | 67 | 67 | 12       | 75       | 33   | 1043  | 5,19   | 100               |
| chr1 | 103483297 | 103483518 | COL11A1 | NM_001854 | 67 | 67 | 11       | 63       | 304  | 13621 | 61,36  | 100               |
| chr1 | 103484339 | 103484509 | COL11A1 | NM_001854 | 67 | 67 | 10       | 42       | 139  | 5983  | 34,99  | 100               |
| chr1 | 103487175 | 103487363 | COL11A1 | NM_001854 | 67 | 67 | 9        | 63       | 1028 | 45179 | 239,04 | 100               |
| chr1 | 103488251 | 103488525 | COL11A1 | NM_001854 | 67 | 67 | 8        | 255      | 913  | 38179 | 138,83 | 89,4              |
| chr1 | 103491037 | 103491216 | COL11A1 | NM_001854 | 67 | 67 | 7        | 93       | 248  | 9905  | 55,03  | 100               |
| chr1 | 103491654 | 103491875 | COL11A1 | NM_001854 | 67 | 67 | 6        | 117      | 569  | 25045 | 112,82 | 88,9              |
| chr1 | 103496506 | 103496875 | COL11A1 | NM_001854 | 67 | 67 | 5        | 129      | 464  | 21691 | 58,62  | 100               |
| chr1 | 103540208 | 103540414 | COL11A1 | NM_001854 | 67 | 67 | 4        | 163      | 111  | 4864  | 23,5   | 79,1              |
| chr1 | 103544175 | 103544375 | COL11A1 | NM_001854 | 67 | 67 | 3        | 214      | 186  | 8589  | 42,73  | 75,7              |
| chr1 | 103548359 | 103548532 | COL11A1 | NM_001854 | 67 | 67 | 2        | 168      | 226  | 9427  | 54,18  | 100               |
| chr1 | 103573568 | 103573827 | COL11A1 | NM_001854 | 67 | 67 | 1        | 106      | 1126 | 48686 | 187,25 | 100               |
| chr1 | 109427987 | 109428205 | GPSM2   | NM_013296 | 15 | 14 | 2        | 56       | 165  | 7251  | 33,11  | 100               |
| chr1 | 109439411 | 109439676 | GPSM2   | NM_013296 | 15 | 14 | 3        | 222      | 359  | 16239 | 61,05  | 86                |
| chr1 | 109440078 | 109440281 | GPSM2   | NM_013296 | 15 | 14 | 4        | 136      | 229  | 9351  | 45,84  | 100               |
| chr1 | 109440530 | 109440721 | GPSM2   | NM_013296 | 15 | 14 | 5        | 143      | 449  | 20622 | 107,41 | 98,6              |
| chr1 | 109441214 | 109441604 | GPSM2   | NM_013296 | 15 | 14 | 6,7      | 124,116  | 928  | 44797 | 114,57 | 100,0,89,7        |
| chr1 | 109444362 | 109444544 | GPSM2   | NM_013296 | 15 | 14 | 8        | 156      | 354  | 14782 | 80,78  | 85,3              |
| chr1 | 109445701 | 109445886 | GPSM2   | NM_013296 | 15 | 14 | 9        | 109      | 321  | 14486 | 77,88  | 100               |
| chr1 | 109446693 | 109446869 | GPSM2   | NM_013296 | 15 | 14 | 10       | 130      | 229  | 7998  | 45,19  | 94,6              |
| chr1 | 109456870 | 109457067 | GPSM2   | NM_013296 | 15 | 14 | 11       | 71       | 88   | 3352  | 16,93  | 100               |
| chr1 | 109461207 | 109461419 | GPSM2   | NM_013296 | 15 | 14 | 12       | 177      | 447  | 19172 | 90,01  | 100               |

|      |           |           |        |           |    |    |       |        |      |        |        |             |
|------|-----------|-----------|--------|-----------|----|----|-------|--------|------|--------|--------|-------------|
| chr1 | 109465063 | 109465236 | GPSM2  | NM_013296 | 15 | 14 | 13    | 160    | 565  | 23340  | 134,14 | 85          |
| chr1 | 109466573 | 109466924 | GPSM2  | NM_013296 | 15 | 14 | 14    | 215    | 899  | 43266  | 122,91 | 100         |
| chr1 | 109472382 | 109472656 | GPSM2  | NM_013296 | 15 | 14 | 15    | 240    | 406  | 17587  | 63,95  | 75,4        |
| chr1 | 160011095 | 160012255 | KCNJ10 | NM_002241 | 2  | 1  | 2     | 1140   | 4054 | 192716 | 165,99 | 94,1        |
| chr1 | 215798997 | 215799191 | USH2A  | NM_206933 | 72 | 71 | 72    | 90     | 274  | 11348  | 58,19  | 76,7        |
| chr1 | 215802174 | 215802478 | USH2A  | NM_206933 | 72 | 71 | 71    | 222    | 453  | 20762  | 68,07  | 91,9        |
| chr1 | 215807821 | 215808101 | USH2A  | NM_206933 | 72 | 71 | 70    | 245    | 1041 | 47289  | 168,29 | 91,8        |
| chr1 | 215812432 | 215812653 | USH2A  | NM_206933 | 72 | 71 | 69    | 84     | 204  | 8696   | 39,17  | 100         |
| chr1 | 215813959 | 215814156 | USH2A  | NM_206933 | 72 | 71 | 68    | 177    | 556  | 23630  | 119,34 | 66,7        |
| chr1 | 215820915 | 215821139 | USH2A  | NM_206933 | 72 | 71 | 67    | 209    | 147  | 6207   | 27,59  | 75,6        |
| chr1 | 215821920 | 215822197 | USH2A  | NM_206933 | 72 | 71 | 66    | 239    | 440  | 19681  | 70,79  | 79,1        |
| chr1 | 215824010 | 215824213 | USH2A  | NM_206933 | 72 | 71 | 65    | 210    | 344  | 13614  | 66,74  | 63,8        |
| chr1 | 215844234 | 215844594 | USH2A  | NM_206933 | 72 | 71 | 64    | 322    | 1041 | 46647  | 129,22 | 87,3        |
| chr1 | 215847404 | 215848985 | USH2A  | NM_206933 | 72 | 71 | 63    | 1517   | 5711 | 273665 | 172,99 | 100         |
| chr1 | 215853461 | 215853759 | USH2A  | NM_206933 | 72 | 71 | 62    | 228    | 689  | 31314  | 104,73 | 100         |
| chr1 | 215901305 | 215901671 | USH2A  | NM_206933 | 72 | 71 | 61    | 355    | 1127 | 53042  | 144,53 | 84,5        |
| chr1 | 215914703 | 215914897 | USH2A  | NM_206933 | 72 | 71 | 60    | 163    | 198  | 9083   | 46,58  | 100         |
| chr1 | 215916479 | 215916661 | USH2A  | NM_206933 | 72 | 71 | 59    | 159    | 411  | 18904  | 103,3  | 89,9        |
| chr1 | 215931969 | 215932163 | USH2A  | NM_206933 | 72 | 71 | 58    | 158    | 429  | 18490  | 94,82  | 79,7        |
| chr1 | 215932966 | 215933175 | USH2A  | NM_206933 | 72 | 71 | 57    | 184    | 736  | 31329  | 149,19 | 94,6        |
| chr1 | 215939970 | 215940185 | USH2A  | NM_206933 | 72 | 71 | 56    | 108    | 255  | 11141  | 51,58  | 100         |
| chr1 | 215953249 | 215953458 | USH2A  | NM_206933 | 72 | 71 | 55    | 199    | 580  | 25537  | 121,6  | 67,8        |
| chr1 | 215955405 | 215955575 | USH2A  | NM_206933 | 72 | 71 | 54    | 155    | 254  | 11424  | 66,81  | 86,5        |
| chr1 | 215956075 | 215956293 | USH2A  | NM_206933 | 72 | 71 | 53    | 198    | 311  | 13893  | 63,44  | 100         |
| chr1 | 215959962 | 215960147 | USH2A  | NM_206933 | 72 | 71 | 52    | 205    | 330  | 14551  | 78,23  | 66,3        |
| chr1 | 215963369 | 215963643 | USH2A  | NM_206933 | 72 | 71 | 51    | 224    | 1091 | 49524  | 180,09 | 100         |
| chr1 | 215972256 | 215972512 | USH2A  | NM_206933 | 72 | 71 | 50    | 219    | 1623 | 70581  | 274,63 | 96,8        |
| chr1 | 215987080 | 215987274 | USH2A  | NM_206933 | 72 | 71 | 49    | 169    | 274  | 11106  | 56,95  | 98,8        |
| chr1 | 215990328 | 215990549 | USH2A  | NM_206933 | 72 | 71 | 48    | 199    | 343  | 15034  | 67,72  | 100         |
| chr1 | 216011288 | 216011476 | USH2A  | NM_206933 | 72 | 71 | 47    | 113    | 119  | 4897   | 25,91  | 100         |
| chr1 | 216017600 | 216017815 | USH2A  | NM_206933 | 72 | 71 | 46    | 203    | 378  | 16502  | 76,4   | 88,7        |
| chr1 | 216019221 | 216019433 | USH2A  | NM_206933 | 72 | 71 | 45    | 210    | 229  | 9755   | 45,8   | 73,8        |
| chr1 | 216040285 | 216040515 | USH2A  | NM_206933 | 72 | 71 | 44    | 164    | 550  | 24318  | 105,27 | 100         |
| chr1 | 216051081 | 216051287 | USH2A  | NM_206933 | 72 | 71 | 43    | 123    | 672  | 29277  | 141,43 | 100         |
| chr1 | 216052146 | 216052500 | USH2A  | NM_206933 | 72 | 71 | 42    | 335    | 1300 | 61636  | 173,62 | 88,1        |
| chr1 | 216061816 | 216062496 | USH2A  | NM_206933 | 72 | 71 | 41    | 629    | 4582 | 222174 | 326,25 | 92,4        |
| chr1 | 216073375 | 216073587 | USH2A  | NM_206933 | 72 | 71 | 40    | 143    | 264  | 11390  | 53,47  | 100         |
| chr1 | 216074011 | 216074199 | USH2A  | NM_206933 | 72 | 71 | 39    | 151    | 361  | 15644  | 82,77  | 68,2        |
| chr1 | 216107941 | 216108153 | USH2A  | NM_206933 | 72 | 71 | 38    | 180    | 171  | 6807   | 31,96  | 100         |
| chr1 | 216138627 | 216138851 | USH2A  | NM_206933 | 72 | 71 | 37    | 163    | 70   | 2888   | 12,84  | 100         |
| chr1 | 216143906 | 216144121 | USH2A  | NM_206933 | 72 | 71 | 36    | 152    | 379  | 16371  | 75,79  | 100         |
| chr1 | 216166290 | 216166463 | USH2A  | NM_206933 | 72 | 71 | 35    | 148    | 529  | 23204  | 133,36 | 68,9        |
| chr1 | 216172175 | 216172375 | USH2A  | NM_206933 | 72 | 71 | 34    | 172    | 169  | 7725   | 38,43  | 85,5        |
| chr1 | 216173655 | 216173849 | USH2A  | NM_206933 | 72 | 71 | 33    | 160    | 327  | 15683  | 80,43  | 65,6        |
| chr1 | 216219768 | 216219995 | USH2A  | NM_206933 | 72 | 71 | 32    | 162    | 105  | 4280   | 18,77  | 100         |
| chr1 | 216221826 | 216222044 | USH2A  | NM_206933 | 72 | 71 | 31    | 114    | 211  | 8694   | 39,7   | 100         |
| chr1 | 216243510 | 216243710 | USH2A  | NM_206933 | 72 | 71 | 30    | 192    | 982  | 42727  | 212,57 | 65,1        |
| chr1 | 216246231 | 216246698 | USH2A  | NM_206933 | 72 | 71 | 29,28 | 81.204 | 1790 | 82628  | 176,56 | 100.0,100.0 |
| chr1 | 216251499 | 216251773 | USH2A  | NM_206933 | 72 | 71 | 27    | 274    | 464  | 22220  | 80,8   | 75,2        |
| chr1 | 216256810 | 216257028 | USH2A  | NM_206933 | 72 | 71 | 26    | 131    | 268  | 11080  | 50,59  | 90,8        |
| chr1 | 216257990 | 216258211 | USH2A  | NM_206933 | 72 | 71 | 25    | 180    | 134  | 5640   | 25,41  | 95,6        |



|      |          |          |          |           |    |    |             |                |      |       |        |                        |
|------|----------|----------|----------|-----------|----|----|-------------|----------------|------|-------|--------|------------------------|
| chr2 | 26699780 | 26700863 | OTOF     | NM_194248 | 47 | 46 | 22,21,20,19 | 153,117,91,101 | 1616 | 75588 | 69,73  | 86.3,100.0,100.0,100.0 |
| chr2 | 26702154 | 26702618 | OTOF     | NM_194248 | 47 | 46 | 18,17       | 121.181        | 178  | 7888  | 16,96  | 81.8,100.0             |
| chr2 | 26703063 | 26703260 | OTOF     | NM_194248 | 47 | 46 | 16          | 109            | 452  | 19579 | 98,88  | 100                    |
| chr2 | 26703688 | 26703956 | OTOF     | NM_194248 | 47 | 46 | 15          | 224            | 263  | 12371 | 45,99  | 84,8                   |
| chr2 | 26705266 | 26705457 | OTOF     | NM_194248 | 47 | 46 | 14          | 187            | 968  | 40787 | 212,43 | 98,4                   |
| chr2 | 26706307 | 26706486 | OTOF     | NM_194248 | 47 | 46 | 13          | 187            | 183  | 7645  | 42,47  | 84                     |
| chr2 | 26707336 | 26707512 | OTOF     | NM_194248 | 47 | 46 | 12          | 160            | 807  | 33792 | 190,92 | 100                    |
| chr2 | 26712062 | 26712253 | OTOF     | NM_194248 | 47 | 46 | 11          | 85             | 192  | 8570  | 44,64  | 100                    |
| chr2 | 26712479 | 26712667 | OTOF     | NM_194248 | 47 | 46 | 10          | 63             | 84   | 3651  | 19,32  | 100                    |
| chr2 | 26717757 | 26717936 | OTOF     | NM_194248 | 47 | 46 | 9           | 132            | 555  | 22689 | 126,05 | 96,2                   |
| chr2 | 26724479 | 26724694 | OTOF     | NM_194248 | 47 | 46 | 8           | 55             | 946  | 41364 | 191,5  | 100                    |
| chr2 | 26725193 | 26725405 | OTOF     | NM_194248 | 47 | 46 | 7           | 127            | 297  | 12618 | 59,24  | 80,3                   |
| chr2 | 26726651 | 26726845 | OTOF     | NM_194248 | 47 | 46 | 6           | 74             | 91   | 4268  | 21,89  | 85,1                   |
| chr2 | 26739336 | 26739551 | OTOF     | NM_194248 | 47 | 46 | 5           | 182            | 327  | 14312 | 66,26  | 72,5                   |
| chr2 | 26741782 | 26741958 | OTOF     | NM_194248 | 47 | 46 | 4           | 100            | 1101 | 47290 | 267,18 | 81                     |
| chr2 | 26750610 | 26750810 | OTOF     | NM_194248 | 47 | 46 | 3           | 89             | 442  | 18512 | 92,1   | 100                    |
| chr2 | 26760578 | 26760757 | OTOF     | NM_194248 | 47 | 46 | 2           | 59             | 490  | 21245 | 118,03 | 100                    |
| chr2 | 26781320 | 26781529 | OTOF     | NM_194248 | 47 | 46 | 1           | 79             | 45   | 1869  | 8,9    | 100                    |
| chr2 | 55863289 | 55863599 | PNPT1    | NM_033109 | 28 | 28 | 28          | 156            | 288  | 12783 | 41,1   | 100                    |
| chr2 | 55864619 | 55864819 | PNPT1    | NM_033109 | 28 | 28 | 27          | 48             | 194  | 7591  | 37,77  | 100                    |
| chr2 | 55867625 | 55867840 | PNPT1    | NM_033109 | 28 | 28 | 26          | 79             | 151  | 6407  | 29,66  | 100                    |
| chr2 | 55870226 | 55870491 | PNPT1    | NM_033109 | 28 | 28 | 25,24       | 56.107         | 255  | 10809 | 40,64  | 100.0,35.5             |
| chr2 | 55871743 | 55871958 | PNPT1    | NM_033109 | 28 | 28 | 23          | 84             | 184  | 8157  | 37,76  | 100                    |
| chr2 | 55872500 | 55872700 | PNPT1    | NM_033109 | 28 | 28 | 22          | 84             | 200  | 7615  | 37,89  | 81                     |
| chr2 | 55873322 | 55873572 | PNPT1    | NM_033109 | 28 | 28 | 21,20       | 64,72          | 319  | 13329 | 53,1   | 100.0,31.9             |
| chr2 | 55874445 | 55874645 | PNPT1    | NM_033109 | 28 | 28 | 19          | 107            | 363  | 15975 | 79,48  | 100                    |
| chr2 | 55882036 | 55882233 | PNPT1    | NM_033109 | 28 | 28 | 18          | 54             | 52   | 2167  | 10,94  | 98,1                   |
| chr2 | 55883320 | 55883591 | PNPT1    | NM_033109 | 28 | 28 | 17,16       | 90,67          | 584  | 27090 | 99,6   | 40.0,100.0             |
| chr2 | 55887200 | 55887403 | PNPT1    | NM_033109 | 28 | 28 | 15          | 37             | 93   | 3649  | 17,89  | 100                    |
| chr2 | 55889085 | 55889300 | PNPT1    | NM_033109 | 28 | 28 | 14          | 71             | 58   | 2599  | 12,03  | 100                    |
| chr2 | 55894151 | 55894324 | PNPT1    | NM_033109 | 28 | 28 | 13          | 103            | 913  | 38537 | 221,48 | 75,7                   |
| chr2 | 55895010 | 55895216 | PNPT1    | NM_033109 | 28 | 28 | 12          | 97             | 184  | 7947  | 38,39  | 86,6                   |
| chr2 | 55898457 | 55898630 | PNPT1    | NM_033109 | 28 | 28 | 11          | 58             | 86   | 3511  | 20,18  | 94,8                   |
| chr2 | 55899064 | 55899258 | PNPT1    | NM_033109 | 28 | 28 | 10          | 52             | 459  | 20031 | 102,72 | 100                    |
| chr2 | 55900081 | 55900296 | PNPT1    | NM_033109 | 28 | 28 | 9           | 187            | 205  | 8372  | 38,76  | 71,7                   |
| chr2 | 55906848 | 55907033 | PNPT1    | NM_033109 | 28 | 28 | 8           | 114            | 980  | 41026 | 220,57 | 72,8                   |
| chr2 | 55907876 | 55908091 | PNPT1    | NM_033109 | 28 | 28 | 7,6         | 48,64          | 490  | 21548 | 99,76  | 39.6,100.0             |
| chr2 | 55910856 | 55911038 | PNPT1    | NM_033109 | 28 | 28 | 5           | 50             | 163  | 7022  | 38,37  | 100                    |
| chr2 | 55912105 | 55912290 | PNPT1    | NM_033109 | 28 | 28 | 4           | 106            | 213  | 7966  | 42,83  | 74,5                   |
| chr2 | 55913516 | 55913686 | PNPT1    | NM_033109 | 28 | 28 | 3           | 75             | 92   | 3932  | 22,99  | 85,3                   |
| chr2 | 55914784 | 55914978 | PNPT1    | NM_033109 | 28 | 28 | 2           | 61             | 245  | 10571 | 54,21  | 93,4                   |
| chr2 | 55920714 | 55921006 | PNPT1    | NM_033109 | 28 | 28 | 1           | 161            | 1265 | 57272 | 195,47 | 100                    |
| chr2 | 71162992 | 71163210 | ATP6V1B1 | NM_001692 | 14 | 14 | 1           | 118            | 29   | 1073  | 4,9    | 100                    |
| chr2 | 71170548 | 71170926 | ATP6V1B1 | NM_001692 | 14 | 14 | 2           | 56             | 255  | 10976 | 28,96  | 100                    |
| chr2 | 71185199 | 71185552 | ATP6V1B1 | NM_001692 | 14 | 14 | 3,4         | 99,94          | 1032 | 48270 | 136,36 | 76.8,95.7              |
| chr2 | 71186122 | 71186325 | ATP6V1B1 | NM_001692 | 14 | 14 | 5           | 78             | 679  | 28954 | 141,93 | 100                    |
| chr2 | 71187023 | 71187214 | ATP6V1B1 | NM_001692 | 14 | 14 | 6           | 140            | 427  | 18622 | 96,99  | 100                    |
| chr2 | 71188021 | 71188206 | ATP6V1B1 | NM_001692 | 14 | 14 | 7           | 102            | 457  | 20977 | 112,78 | 100                    |
| chr2 | 71188687 | 71188863 | ATP6V1B1 | NM_001692 | 14 | 14 | 8           | 98             | 354  | 15211 | 85,94  | 100                    |
| chr2 | 71189883 | 71190068 | ATP6V1B1 | NM_001692 | 14 | 14 | 9           | 124            | 463  | 19924 | 107,12 | 100                    |
| chr2 | 71190236 | 71190445 | ATP6V1B1 | NM_001692 | 14 | 14 | 10          | 151            | 868  | 38958 | 185,51 | 100                    |



|      |           |           |        |           |    |    |       |       |     |       |        |             |
|------|-----------|-----------|--------|-----------|----|----|-------|-------|-----|-------|--------|-------------|
| chr2 | 227967783 | 227967977 | COL4A4 | NM_000092 | 48 | 47 | 14    | 54    | 442 | 17856 | 91,57  | 100         |
| chr2 | 227968619 | 227968831 | COL4A4 | NM_000092 | 48 | 47 | 13    | 81    | 141 | 5938  | 27,88  | 100         |
| chr2 | 227973175 | 227973390 | COL4A4 | NM_000092 | 48 | 47 | 12    | 42    | 371 | 16173 | 74,88  | 100         |
| chr2 | 227973424 | 227973636 | COL4A4 | NM_000092 | 48 | 47 | 11    | 36    | 198 | 8081  | 37,94  | 100         |
| chr2 | 227973810 | 227974158 | COL4A4 | NM_000092 | 48 | 47 | 10    | 63    | 689 | 31618 | 90,6   | 100         |
| chr2 | 227976272 | 227976496 | COL4A4 | NM_000092 | 48 | 47 | 9     | 36    | 262 | 11081 | 49,25  | 100         |
| chr2 | 227979189 | 227979386 | COL4A4 | NM_000092 | 48 | 47 | 8     | 69    | 362 | 13511 | 68,24  | 62,3        |
| chr2 | 227983243 | 227983443 | COL4A4 | NM_000092 | 48 | 47 | 7     | 117   | 552 | 24827 | 123,52 | 70,9        |
| chr2 | 227984547 | 227984720 | COL4A4 | NM_000092 | 48 | 47 | 6     | 45    | 44  | 1767  | 10,16  | 100         |
| chr2 | 227985638 | 227985948 | COL4A4 | NM_000092 | 48 | 47 | 5     | 135   | 539 | 25013 | 80,43  | 100         |
| chr2 | 228004800 | 228005015 | COL4A4 | NM_000092 | 48 | 47 | 4     | 78    | 700 | 28421 | 131,58 | 100         |
| chr2 | 228009203 | 228009427 | COL4A4 | NM_000092 | 48 | 47 | 3     | 43    | 164 | 6827  | 30,34  | 100         |
| chr2 | 228012038 | 228012315 | COL4A4 | NM_000092 | 48 | 47 | 2     | 71    | 653 | 29771 | 107,09 | 100         |
| chr2 | 228029282 | 228029494 | COL4A3 | NM_000091 | 52 | 52 | 1     | 87    | 4   | 184   | 0,86   | 59,8        |
| chr2 | 228102680 | 228102859 | COL4A3 | NM_000091 | 52 | 52 | 2     | 57    | 147 | 5716  | 31,76  | 100         |
| chr2 | 228104743 | 228104931 | COL4A3 | NM_000091 | 52 | 52 | 3     | 90    | 636 | 27808 | 147,13 | 81,1        |
| chr2 | 228108978 | 228109187 | COL4A3 | NM_000091 | 52 | 52 | 4     | 45    | 390 | 17227 | 82,03  | 100         |
| chr2 | 228109529 | 228109738 | COL4A3 | NM_000091 | 52 | 52 | 5     | 45    | 136 | 5580  | 26,57  | 100         |
| chr2 | 228110675 | 228110872 | COL4A3 | NM_000091 | 52 | 52 | 6     | 63    | 270 | 11269 | 56,91  | 92,1        |
| chr2 | 228111439 | 228111639 | COL4A3 | NM_000091 | 52 | 52 | 7     | 54    | 430 | 18125 | 90,17  | 29,6        |
| chr2 | 228112183 | 228112377 | COL4A3 | NM_000091 | 52 | 52 | 8     | 27    | 222 | 9800  | 50,26  | 100         |
| chr2 | 228113097 | 228113297 | COL4A3 | NM_000091 | 52 | 52 | 9     | 78    | 251 | 10474 | 52,11  | 100         |
| chr2 | 228115786 | 228116096 | COL4A3 | NM_000091 | 52 | 52 | 10,11 | 63,36 | 289 | 13265 | 42,65  | 100.0,100.0 |
| chr2 | 228117987 | 228118326 | COL4A3 | NM_000091 | 52 | 52 | 12,13 | 42,78 | 575 | 25388 | 74,67  | 100.0,64.1  |
| chr2 | 228118743 | 228118970 | COL4A3 | NM_000091 | 52 | 52 | 14    | 63    | 301 | 13891 | 60,93  | 100         |
| chr2 | 228119325 | 228119546 | COL4A3 | NM_000091 | 52 | 52 | 15    | 60    | 390 | 15162 | 68,3   | 100         |
| chr2 | 228120678 | 228120869 | COL4A3 | NM_000091 | 52 | 52 | 16    | 45    | 236 | 10876 | 56,65  | 100         |
| chr2 | 228121035 | 228121238 | COL4A3 | NM_000091 | 52 | 52 | 17    | 54    | 291 | 11684 | 57,27  | 100         |
| chr2 | 228122242 | 228122430 | COL4A3 | NM_000091 | 52 | 52 | 18    | 42    | 392 | 16721 | 88,47  | 100         |
| chr2 | 228124440 | 228124726 | COL4A3 | NM_000091 | 52 | 52 | 19    | 85    | 267 | 12126 | 42,25  | 100         |
| chr2 | 228125709 | 228125918 | COL4A3 | NM_000091 | 52 | 52 | 20    | 36    | 241 | 10406 | 49,55  | 100         |
| chr2 | 228128420 | 228128602 | COL4A3 | NM_000091 | 52 | 52 | 21    | 165   | 378 | 15248 | 83,32  | 64,8        |
| chr2 | 228131075 | 228131293 | COL4A3 | NM_000091 | 52 | 52 | 22    | 93    | 238 | 10274 | 46,91  | 100         |
| chr2 | 228131725 | 228131916 | COL4A3 | NM_000091 | 52 | 52 | 23    | 96    | 508 | 22113 | 115,17 | 83,3        |
| chr2 | 228134527 | 228134724 | COL4A3 | NM_000091 | 52 | 52 | 24    | 71    | 130 | 5729  | 28,93  | 100         |
| chr2 | 228135413 | 228135631 | COL4A3 | NM_000091 | 52 | 52 | 25    | 183   | 218 | 9646  | 44,05  | 79,8        |
| chr2 | 228137576 | 228137776 | COL4A3 | NM_000091 | 52 | 52 | 26    | 169   | 218 | 8400  | 41,79  | 66,3        |
| chr2 | 228141001 | 228141174 | COL4A3 | NM_000091 | 52 | 52 | 27    | 93    | 401 | 16670 | 95,8   | 79,6        |
| chr2 | 228142089 | 228142301 | COL4A3 | NM_000091 | 52 | 52 | 28    | 105   | 215 | 9172  | 43,06  | 100         |
| chr2 | 228144412 | 228144585 | COL4A3 | NM_000091 | 52 | 52 | 29    | 98    | 127 | 5510  | 31,67  | 78,6        |
| chr2 | 228145199 | 228145399 | COL4A3 | NM_000091 | 52 | 52 | 30    | 151   | 473 | 19283 | 95,94  | 71,5        |
| chr2 | 228145502 | 228145702 | COL4A3 | NM_000091 | 52 | 52 | 31    | 114   | 137 | 5662  | 28,17  | 82,5        |
| chr2 | 228147118 | 228147324 | COL4A3 | NM_000091 | 52 | 52 | 32    | 168   | 170 | 7081  | 34,21  | 78          |
| chr2 | 228148412 | 228148642 | COL4A3 | NM_000091 | 52 | 52 | 33    | 90    | 259 | 11367 | 49,21  | 100         |
| chr2 | 228148968 | 228149150 | COL4A3 | NM_000091 | 52 | 52 | 34    | 135   | 714 | 29792 | 162,8  | 69,6        |
| chr2 | 228153829 | 228154044 | COL4A3 | NM_000091 | 52 | 52 | 35    | 99    | 267 | 12087 | 55,96  | 100         |
| chr2 | 228154611 | 228154784 | COL4A3 | NM_000091 | 52 | 52 | 36    | 90    | 427 | 17752 | 102,02 | 77,8        |
| chr2 | 228155387 | 228155572 | COL4A3 | NM_000091 | 52 | 52 | 37    | 140   | 222 | 9477  | 50,95  | 78,6        |
| chr2 | 228157824 | 228157997 | COL4A3 | NM_000091 | 52 | 52 | 38    | 127   | 237 | 9501  | 54,6   | 71,7        |
| chr2 | 228159130 | 228159339 | COL4A3 | NM_000091 | 52 | 52 | 39    | 81    | 285 | 12991 | 61,86  | 100         |
| chr2 | 228159628 | 228159837 | COL4A3 | NM_000091 | 52 | 52 | 40    | 99    | 396 | 17331 | 82,53  | 100         |







|      |           |           |          |              |    |    |       |         |      |        |        |             |
|------|-----------|-----------|----------|--------------|----|----|-------|---------|------|--------|--------|-------------|
| chr3 | 193361746 | 193361970 | OPA1     | NM_130837    | 31 | 30 | 16    | 131     | 162  | 6921   | 30,76  | 100         |
| chr3 | 193363310 | 193363602 | OPA1     | NM_130837    | 31 | 30 | 17,18 | 73,73   | 122  | 4934   | 16,84  | 100,0,100,0 |
| chr3 | 193364847 | 193365041 | OPA1     | NM_130837    | 31 | 30 | 19    | 116     | 292  | 12480  | 64     | 100         |
| chr3 | 193365745 | 193365954 | OPA1     | NM_130837    | 31 | 30 | 20    | 65      | 376  | 16257  | 77,41  | 100         |
| chr3 | 193366470 | 193366661 | OPA1     | NM_130837    | 31 | 30 | 21    | 77      | 203  | 9274   | 48,3   | 100         |
| chr3 | 193372636 | 193372827 | OPA1     | NM_130837    | 31 | 30 | 22    | 166     | 199  | 8508   | 44,31  | 100         |
| chr3 | 193374859 | 193375029 | OPA1     | NM_130837    | 31 | 30 | 23    | 153     | 207  | 9047   | 52,91  | 100         |
| chr3 | 193376659 | 193376859 | OPA1     | NM_130837    | 31 | 30 | 24    | 109     | 290  | 12808  | 63,72  | 100         |
| chr3 | 193377222 | 193377410 | OPA1     | NM_130837    | 31 | 30 | 25    | 80      | 167  | 6958   | 36,81  | 100         |
| chr3 | 193380607 | 193380810 | OPA1     | NM_130837    | 31 | 30 | 26    | 141     | 97   | 4040   | 19,8   | 100         |
| chr3 | 193382629 | 193382832 | OPA1     | NM_130837    | 31 | 30 | 27    | 117     | 151  | 6909   | 33,87  | 100         |
| chr3 | 193384043 | 193384219 | OPA1     | NM_130837    | 31 | 30 | 28    | 94      | 224  | 9165   | 51,78  | 100         |
| chr3 | 193384900 | 193385168 | OPA1     | NM_130837    | 31 | 30 | 29    | 111     | 994  | 43253  | 160,79 | 100         |
| chr3 | 193409845 | 193410054 | OPA1     | NM_130837    | 31 | 30 | 30    | 65      | 127  | 5481   | 26,1   | 100         |
| chr4 | 6279081   | 6279373   | WFS1     | NM_006005    | 8  | 7  | 2     | 232     | 148  | 6075   | 20,73  | 82,3        |
| chr4 | 6288700   | 6288885   | WFS1     | NM_006005    | 8  | 7  | 3     | 83      | 495  | 19949  | 107,25 | 79,5        |
| chr4 | 6290748   | 6290951   | WFS1     | NM_006005    | 8  | 7  | 4     | 145     | 30   | 1316   | 6,45   | 76,6        |
| chr4 | 6292833   | 6293045   | WFS1     | NM_006005    | 8  | 7  | 5     | 171     | 413  | 16844  | 79,08  | 71,3        |
| chr4 | 6293514   | 6293720   | WFS1     | NM_006005    | 8  | 7  | 6     | 81      | 26   | 991    | 4,79   | 95,1        |
| chr4 | 6296697   | 6296879   | WFS1     | NM_006005    | 8  | 7  | 7     | 149     | 309  | 13719  | 74,97  | 75,2        |
| chr4 | 6302407   | 6304281   | WFS1     | NM_006005    | 8  | 7  | 8     | 1812    | 5669 | 270586 | 144,31 | 98,7        |
| chr4 | 15477439  | 15477621  | CC2D2A   | NM_020785    | 7  | 5  | 3     | 39      | 126  | 5207   | 28,45  | 100         |
| chr4 | 15480222  | 15480422  | CC2D2A   | NM_020785    | 7  | 5  | 4     | 84      | 213  | 8915   | 44,35  | 90,5        |
| chr4 | 15480728  | 15480928  | CC2D2A   | NM_020785    | 7  | 5  | 5     | 106     | 411  | 17710  | 88,11  | 77,4        |
| chr4 | 15482349  | 15482558  | CC2D2A   | NM_020785    | 7  | 5  | 6     | 124     | 407  | 17479  | 83,23  | 83,1        |
| chr4 | 42895321  | 42895755  | GRXCR1   | NM_001080476 | 4  | 4  | 1     | 384     | 2820 | 127651 | 293,45 | 90,4        |
| chr4 | 42964853  | 42965124  | GRXCR1   | NM_001080476 | 4  | 4  | 2     | 243     | 480  | 21535  | 79,17  | 88,9        |
| chr4 | 43022261  | 43022458  | GRXCR1   | NM_001080476 | 4  | 4  | 3     | 66      | 382  | 16326  | 82,45  | 100         |
| chr4 | 43032270  | 43032630  | GRXCR1   | NM_001080476 | 4  | 4  | 4     | 180     | 1776 | 81382  | 225,43 | 100         |
| chr4 | 88531901  | 88532122  | DSPP     | NM_014208    | 5  | 4  | 2     | 51      | 49   | 1953   | 8,8    | 100         |
| chr4 | 88533226  | 88534531  | DSPP     | NM_014208    | 5  | 4  | 3,4   | 84,987  | 1243 | 59393  | 45,48  | 100,0,100,0 |
| chr4 | 88534851  | 88535993  | DSPP     | NM_014208    | 5  | 4  | 5     | 2784    | 2811 | 132439 | 115,87 | 38          |
| chr4 | 88536273  | 88536393  | DSPP     | NM_014208    | 5  | 4  | 5     | 2784    | 410  | 12949  | 107,02 | 4,3         |
| chr4 | 88537583  | 88537703  | DSPP     | NM_014208    | 5  | 4  | 5     | 2784    | 757  | 27298  | 225,6  | 4,3         |
| chr5 | 68715140  | 68716303  | MARVELD2 | NM_001038603 | 7  | 6  | 2     | 1146    | 3993 | 191144 | 164,21 | 95,2        |
| chr5 | 68720279  | 68720494  | MARVELD2 | NM_001038603 | 7  | 6  | 3     | 36      | 103  | 4458   | 20,64  | 100         |
| chr5 | 68728255  | 68728455  | MARVELD2 | NM_001038603 | 7  | 6  | 4     | 149     | 160  | 7362   | 36,63  | 68,5        |
| chr5 | 68728683  | 68728868  | MARVELD2 | NM_001038603 | 7  | 6  | 5     | 172     | 557  | 24056  | 129,33 | 69,8        |
| chr5 | 68736273  | 68736470  | MARVELD2 | NM_001038603 | 7  | 6  | 6     | 51      | 87   | 3800   | 19,19  | 100         |
| chr5 | 68737321  | 68737521  | MARVELD2 | NM_001038603 | 7  | 6  | 7     | 123     | 50   | 2401   | 11,95  | 100         |
| chr5 | 89910694  | 89910903  | GPR98    | NM_032119    | 90 | 90 | 2     | 185     | 24   | 989    | 4,71   | 77,3        |
| chr5 | 89913595  | 89913792  | GPR98    | NM_032119    | 90 | 90 | 3     | 150     | 434  | 19893  | 100,47 | 100         |
| chr5 | 89914859  | 89915035  | GPR98    | NM_032119    | 90 | 90 | 4     | 96      | 53   | 2447   | 13,82  | 100         |
| chr5 | 89918293  | 89918517  | GPR98    | NM_032119    | 90 | 90 | 5     | 105     | 338  | 14655  | 65,13  | 99          |
| chr5 | 89920891  | 89921097  | GPR98    | NM_032119    | 90 | 90 | 6     | 114     | 455  | 19863  | 95,96  | 100         |
| chr5 | 89922977  | 89923565  | GPR98    | NM_032119    | 90 | 90 | 7     | 566     | 1367 | 64529  | 109,56 | 95,1        |
| chr5 | 89924351  | 89924616  | GPR98    | NM_032119    | 90 | 90 | 8     | 271     | 3855 | 178361 | 670,53 | 87,8        |
| chr5 | 89925014  | 89925368  | GPR98    | NM_032119    | 90 | 90 | 9     | 330     | 799  | 34971  | 98,51  | 100         |
| chr5 | 89930936  | 89931148  | GPR98    | NM_032119    | 90 | 90 | 10    | 177     | 422  | 18332  | 86,07  | 97,2        |
| chr5 | 89933510  | 89933778  | GPR98    | NM_032119    | 90 | 90 | 11    | 224     | 562  | 24373  | 90,61  | 100         |
| chr5 | 89938372  | 89938824  | GPR98    | NM_032119    | 90 | 90 | 12,13 | 127,186 | 880  | 40399  | 89,18  | 100,0,81,7  |

|      |          |          |       |           |    |    |       |         |      |       |        |             |
|------|----------|----------|-------|-----------|----|----|-------|---------|------|-------|--------|-------------|
| chr5 | 89939558 | 89939764 | GPR98 | NM_032119 | 90 | 90 | 14    | 181     | 384  | 17206 | 83,12  | 80,1        |
| chr5 | 89940507 | 89940689 | GPR98 | NM_032119 | 90 | 90 | 15    | 164     | 296  | 12356 | 67,52  | 100         |
| chr5 | 89941749 | 89941940 | GPR98 | NM_032119 | 90 | 90 | 16    | 124     | 152  | 6713  | 34,96  | 100         |
| chr5 | 89943262 | 89943551 | GPR98 | NM_032119 | 90 | 90 | 17    | 267     | 531  | 24253 | 83,63  | 88,8        |
| chr5 | 89947416 | 89947598 | GPR98 | NM_032119 | 90 | 90 | 18    | 127     | 134  | 5753  | 31,44  | 100         |
| chr5 | 89948141 | 89948341 | GPR98 | NM_032119 | 90 | 90 | 19    | 218     | 219  | 9314  | 46,34  | 82,1        |
| chr5 | 89948963 | 89949886 | GPR98 | NM_032119 | 90 | 90 | 20    | 744     | 1680 | 81096 | 87,77  | 100         |
| chr5 | 89953665 | 89954013 | GPR98 | NM_032119 | 90 | 90 | 21    | 374     | 702  | 31019 | 88,88  | 78,1        |
| chr5 | 89968386 | 89968574 | GPR98 | NM_032119 | 90 | 90 | 22    | 177     | 348  | 14311 | 75,72  | 87          |
| chr5 | 89969878 | 89970105 | GPR98 | NM_032119 | 90 | 90 | 23    | 181     | 738  | 31107 | 136,43 | 96,1        |
| chr5 | 89971132 | 89971320 | GPR98 | NM_032119 | 90 | 90 | 24    | 203     | 335  | 13605 | 71,98  | 64,5        |
| chr5 | 89971918 | 89972118 | GPR98 | NM_032119 | 90 | 90 | 25    | 130     | 87   | 3946  | 19,63  | 83,8        |
| chr5 | 89975272 | 89975487 | GPR98 | NM_032119 | 90 | 90 | 26    | 81      | 635  | 28772 | 133,2  | 100         |
| chr5 | 89977086 | 89977307 | GPR98 | NM_032119 | 90 | 90 | 27    | 140     | 438  | 19223 | 86,59  | 100         |
| chr5 | 89979392 | 89980007 | GPR98 | NM_032119 | 90 | 90 | 28    | 610     | 1337 | 62819 | 101,98 | 99,2        |
| chr5 | 89981532 | 89981741 | GPR98 | NM_032119 | 90 | 90 | 29    | 216     | 480  | 20545 | 97,83  | 67,1        |
| chr5 | 89985748 | 89985942 | GPR98 | NM_032119 | 90 | 90 | 30    | 216     | 80   | 3653  | 18,73  | 67,6        |
| chr5 | 89986532 | 89986919 | GPR98 | NM_032119 | 90 | 90 | 31    | 245     | 1810 | 83307 | 214,71 | 100         |
| chr5 | 89988427 | 89988603 | GPR98 | NM_032119 | 90 | 90 | 32    | 182     | 688  | 29309 | 165,59 | 97,3        |
| chr5 | 89989647 | 89990517 | GPR98 | NM_032119 | 90 | 90 | 33    | 812     | 1735 | 82801 | 95,06  | 99,9        |
| chr5 | 89992773 | 89992994 | GPR98 | NM_032119 | 90 | 90 | 34    | 210     | 209  | 9373  | 42,22  | 91          |
| chr5 | 89999515 | 89999703 | GPR98 | NM_032119 | 90 | 90 | 35    | 131     | 345  | 13767 | 72,84  | 74,8        |
| chr5 | 90000140 | 90000316 | GPR98 | NM_032119 | 90 | 90 | 36    | 100     | 470  | 20006 | 113,03 | 100         |
| chr5 | 90001239 | 90001433 | GPR98 | NM_032119 | 90 | 90 | 37    | 180     | 476  | 20915 | 107,26 | 87,8        |
| chr5 | 90002020 | 90002226 | GPR98 | NM_032119 | 90 | 90 | 38    | 164     | 480  | 21545 | 104,08 | 100         |
| chr5 | 90004618 | 90004803 | GPR98 | NM_032119 | 90 | 90 | 39    | 94      | 721  | 29323 | 157,65 | 100         |
| chr5 | 90006770 | 90007112 | GPR98 | NM_032119 | 90 | 90 | 40,41 | 79.139  | 236  | 10835 | 31,59  | 100,0,80.6  |
| chr5 | 90008113 | 90008310 | GPR98 | NM_032119 | 90 | 90 | 42    | 142     | 87   | 3255  | 16,44  | 93,7        |
| chr5 | 90012259 | 90012521 | GPR98 | NM_032119 | 90 | 90 | 43    | 263     | 621  | 27157 | 103,26 | 90,5        |
| chr5 | 90015846 | 90016067 | GPR98 | NM_032119 | 90 | 90 | 44    | 176     | 324  | 13039 | 58,73  | 100         |
| chr5 | 90016713 | 90016901 | GPR98 | NM_032119 | 90 | 90 | 45    | 125     | 998  | 43860 | 232,06 | 100         |
| chr5 | 90020607 | 90021050 | GPR98 | NM_032119 | 90 | 90 | 46,47 | 158.147 | 243  | 10948 | 24,66  | 100,0,100.0 |
| chr5 | 90021268 | 90021462 | GPR98 | NM_032119 | 90 | 90 | 48    | 108     | 494  | 22806 | 116,95 | 89,8        |
| chr5 | 90024432 | 90024742 | GPR98 | NM_032119 | 90 | 90 | 49    | 265     | 530  | 24230 | 77,91  | 97          |
| chr5 | 90025449 | 90025649 | GPR98 | NM_032119 | 90 | 90 | 50    | 123     | 642  | 27120 | 134,93 | 100         |
| chr5 | 90040814 | 90041067 | GPR98 | NM_032119 | 90 | 90 | 51    | 220     | 1323 | 59997 | 236,21 | 93,2        |
| chr5 | 90041424 | 90041636 | GPR98 | NM_032119 | 90 | 90 | 52    | 205     | 317  | 14242 | 66,86  | 92,2        |
| chr5 | 90046313 | 90046504 | GPR98 | NM_032119 | 90 | 90 | 53    | 147     | 500  | 21914 | 114,14 | 93,2        |
| chr5 | 90049387 | 90049673 | GPR98 | NM_032119 | 90 | 90 | 54    | 256     | 473  | 21613 | 75,31  | 100         |
| chr5 | 90050740 | 90050928 | GPR98 | NM_032119 | 90 | 90 | 55    | 203     | 395  | 17143 | 90,7   | 63,5        |
| chr5 | 90052327 | 90052530 | GPR98 | NM_032119 | 90 | 90 | 56    | 177     | 252  | 10813 | 53     | 68,4        |
| chr5 | 90052741 | 90052965 | GPR98 | NM_032119 | 90 | 90 | 57    | 183     | 211  | 9146  | 40,65  | 92,9        |
| chr5 | 90055167 | 90055497 | GPR98 | NM_032119 | 90 | 90 | 58    | 180     | 994  | 45654 | 137,93 | 100         |
| chr5 | 90059088 | 90059318 | GPR98 | NM_032119 | 90 | 90 | 59    | 165     | 321  | 14644 | 63,39  | 100         |
| chr5 | 90069925 | 90070134 | GPR98 | NM_032119 | 90 | 90 | 60    | 118     | 234  | 10518 | 50,09  | 100         |
| chr5 | 90072225 | 90072446 | GPR98 | NM_032119 | 90 | 90 | 61    | 124     | 249  | 10649 | 47,97  | 100         |
| chr5 | 90073651 | 90073872 | GPR98 | NM_032119 | 90 | 90 | 62    | 139     | 134  | 5959  | 26,84  | 100         |
| chr5 | 90074180 | 90074365 | GPR98 | NM_032119 | 90 | 90 | 63    | 183     | 376  | 16402 | 88,18  | 66,7        |
| chr5 | 90074642 | 90074943 | GPR98 | NM_032119 | 90 | 90 | 64    | 233     | 230  | 9885  | 32,73  | 100         |
| chr5 | 90077091 | 90077469 | GPR98 | NM_032119 | 90 | 90 | 65    | 149     | 685  | 29958 | 79,04  | 100         |
| chr5 | 90078911 | 90079120 | GPR98 | NM_032119 | 90 | 90 | 66    | 202     | 126  | 5491  | 26,15  | 89,1        |

|      |           |           |         |           |    |    |      |         |      |        |        |             |
|------|-----------|-----------|---------|-----------|----|----|------|---------|------|--------|--------|-------------|
| chr5 | 90079693  | 90079958  | GPR98   | NM_032119 | 90 | 90 | 67   | 220     | 641  | 29300  | 110,15 | 82,7        |
| chr5 | 90083831  | 90084108  | GPR98   | NM_032119 | 90 | 90 | 68   | 240     | 526  | 23708  | 85,28  | 92,1        |
| chr5 | 90085493  | 90085693  | GPR98   | NM_032119 | 90 | 90 | 69   | 150     | 48   | 2108   | 10,49  | 100         |
| chr5 | 90086720  | 90087246  | GPR98   | NM_032119 | 90 | 90 | 70   | 474     | 1127 | 52921  | 100,42 | 93,7        |
| chr5 | 90098455  | 90098658  | GPR98   | NM_032119 | 90 | 90 | 71   | 144     | 817  | 36601  | 179,42 | 71,5        |
| chr5 | 90101054  | 90101254  | GPR98   | NM_032119 | 90 | 90 | 72   | 175     | 401  | 17375  | 86,44  | 88          |
| chr5 | 90103335  | 90103514  | GPR98   | NM_032119 | 90 | 90 | 73   | 136     | 68   | 2885   | 16,03  | 70,6        |
| chr5 | 90106064  | 90107197  | GPR98   | NM_032119 | 90 | 90 | 74   | 1106    | 4832 | 235509 | 207,68 | 98,7        |
| chr5 | 90111385  | 90111600  | GPR98   | NM_032119 | 90 | 90 | 75   | 118     | 210  | 8741   | 40,47  | 100         |
| chr5 | 90119269  | 90119451  | GPR98   | NM_032119 | 90 | 90 | 76   | 172     | 486  | 20159  | 110,16 | 84,3        |
| chr5 | 90124786  | 90125048  | GPR98   | NM_032119 | 90 | 90 | 77   | 243     | 380  | 16071  | 61,11  | 89,7        |
| chr5 | 90136378  | 90136809  | GPR98   | NM_032119 | 90 | 90 | 78   | 408     | 775  | 34347  | 79,51  | 100         |
| chr5 | 90144445  | 90144660  | GPR98   | NM_032119 | 90 | 90 | 79   | 185     | 255  | 10966  | 50,77  | 100         |
| chr5 | 90149091  | 90149353  | GPR98   | NM_032119 | 90 | 90 | 80   | 250     | 502  | 22620  | 86,01  | 100         |
| chr5 | 90149872  | 90150075  | GPR98   | NM_032119 | 90 | 90 | 81   | 140     | 209  | 9314   | 45,66  | 100         |
| chr5 | 90151498  | 90151713  | GPR98   | NM_032119 | 90 | 90 | 82   | 161     | 516  | 21807  | 100,96 | 96,9        |
| chr5 | 90159538  | 90159768  | GPR98   | NM_032119 | 90 | 90 | 83   | 101     | 336  | 15651  | 67,75  | 100         |
| chr5 | 90261177  | 90261395  | GPR98   | NM_032119 | 90 | 90 | 84   | 117     | 243  | 10448  | 47,71  | 100         |
| chr5 | 90281119  | 90281331  | GPR98   | NM_032119 | 90 | 90 | 85   | 179     | 541  | 22834  | 107,2  | 95,5        |
| chr5 | 90368230  | 90368454  | GPR98   | NM_032119 | 90 | 90 | 86   | 158     | 140  | 6430   | 28,58  | 100         |
| chr5 | 90398026  | 90398217  | GPR98   | NM_032119 | 90 | 90 | 87   | 122     | 413  | 19105  | 99,51  | 100         |
| chr5 | 90445833  | 90446030  | GPR98   | NM_032119 | 90 | 90 | 88   | 192     | 561  | 24374  | 123,1  | 95,8        |
| chr5 | 90449092  | 90449271  | GPR98   | NM_032119 | 90 | 90 | 89   | 178     | 299  | 12618  | 70,1   | 69,7        |
| chr5 | 90459529  | 90459824  | GPR98   | NM_032119 | 90 | 90 | 90   | 119     | 1349 | 59457  | 200,87 | 100         |
| chr5 | 118788154 | 118788458 | HSD17B4 | NM_000414 | 24 | 24 | 1    | 58      | 306  | 12220  | 40,07  | 100         |
| chr5 | 118791939 | 118792130 | HSD17B4 | NM_000414 | 24 | 24 | 2    | 54      | 184  | 7536   | 39,25  | 100         |
| chr5 | 118809571 | 118809747 | HSD17B4 | NM_000414 | 24 | 24 | 3    | 108     | 83   | 3604   | 20,36  | 100         |
| chr5 | 118809980 | 118810186 | HSD17B4 | NM_000414 | 24 | 24 | 4    | 60      | 241  | 10780  | 52,08  | 100         |
| chr5 | 118811445 | 118811627 | HSD17B4 | NM_000414 | 24 | 24 | 6    | 47      | 607  | 25798  | 140,97 | 100         |
| chr5 | 118813092 | 118813295 | HSD17B4 | NM_000414 | 24 | 24 | 7    | 85      | 353  | 16305  | 79,93  | 100         |
| chr5 | 118814588 | 118814773 | HSD17B4 | NM_000414 | 24 | 24 | 8    | 188     | 470  | 18877  | 101,49 | 68,6        |
| chr5 | 118824841 | 118825041 | HSD17B4 | NM_000414 | 24 | 24 | 9    | 92      | 706  | 31612  | 157,27 | 100         |
| chr5 | 118827700 | 118827897 | HSD17B4 | NM_000414 | 24 | 24 | 10   | 25      | 240  | 10518  | 53,12  | 100         |
| chr5 | 118829419 | 118829610 | HSD17B4 | NM_000414 | 24 | 24 | 11   | 129     | 162  | 7027   | 36,6   | 76          |
| chr5 | 118832264 | 118832458 | HSD17B4 | NM_000414 | 24 | 24 | 12   | 104     | 1486 | 59583  | 305,55 | 75          |
| chr5 | 118835064 | 118835317 | HSD17B4 | NM_000414 | 24 | 24 | 13   | 237     | 375  | 15571  | 61,3   | 78,1        |
| chr5 | 118837598 | 118837792 | HSD17B4 | NM_000414 | 24 | 24 | 14   | 52      | 210  | 8683   | 44,53  | 100         |
| chr5 | 118842523 | 118842714 | HSD17B4 | NM_000414 | 24 | 24 | 15   | 72      | 82   | 3560   | 18,54  | 86,1        |
| chr5 | 118844820 | 118845002 | HSD17B4 | NM_000414 | 24 | 24 | 16   | 104     | 344  | 13980  | 76,39  | 100         |
| chr5 | 118850680 | 118850883 | HSD17B4 | NM_000414 | 24 | 24 | 17   | 66      | 249  | 11104  | 54,43  | 93,9        |
| chr5 | 118860830 | 118861027 | HSD17B4 | NM_000414 | 24 | 24 | 18   | 70      | 295  | 12688  | 64,08  | 100         |
| chr5 | 118861573 | 118861776 | HSD17B4 | NM_000414 | 24 | 24 | 19   | 107     | 564  | 24371  | 119,47 | 100         |
| chr5 | 118862845 | 118863024 | HSD17B4 | NM_000414 | 24 | 24 | 20   | 87      | 144  | 6061   | 33,67  | 80,5        |
| chr5 | 118865564 | 118865758 | HSD17B4 | NM_000414 | 24 | 24 | 21   | 87      | 364  | 16366  | 83,93  | 100         |
| chr5 | 118866914 | 118867126 | HSD17B4 | NM_000414 | 24 | 24 | 22   | 139     | 177  | 7668   | 36     | 100         |
| chr5 | 118872081 | 118872281 | HSD17B4 | NM_000414 | 24 | 24 | 23   | 128     | 433  | 18942  | 94,24  | 100         |
| chr5 | 118877646 | 118877852 | HSD17B4 | NM_000414 | 24 | 24 | 24   | 90      | 556  | 25254  | 122    | 48,9        |
| chr5 | 140053734 | 140053943 | HARS    | NM_002109 | 13 | 13 | 13   | 72      | 432  | 18297  | 87,13  | 100         |
| chr5 | 140054278 | 140054466 | HARS    | NM_002109 | 13 | 13 | 12   | 147     | 1648 | 71777  | 379,77 | 90,5        |
| chr5 | 140054487 | 140054708 | HARS    | NM_002109 | 13 | 13 | 11   | 117     | 711  | 28733  | 129,43 | 91,5        |
| chr5 | 140056227 | 140056765 | HARS    | NM_002109 | 13 | 13 | 10,9 | 243.128 | 1849 | 83297  | 154,54 | 100,0,100,0 |

|      |           |           |          |              |    |    |         |             |      |        |        |                  |
|------|-----------|-----------|----------|--------------|----|----|---------|-------------|------|--------|--------|------------------|
| chr5 | 140056798 | 140057010 | HARS     | NM_002109    | 13 | 13 | 8       | 94          | 1131 | 48909  | 229,62 | 100              |
| chr5 | 140057203 | 140057581 | HARS     | NM_002109    | 13 | 13 | 7,6     | 99.108      | 1499 | 72905  | 192,36 | 100.0,82.4       |
| chr5 | 140058618 | 140058797 | HARS     | NM_002109    | 13 | 13 | 5       | 126         | 250  | 10430  | 57,94  | 75,4             |
| chr5 | 140059278 | 140059505 | HARS     | NM_002109    | 13 | 13 | 4       | 96          | 497  | 22271  | 97,68  | 100              |
| chr5 | 140062593 | 140062772 | HARS     | NM_002109    | 13 | 13 | 3       | 120         | 1106 | 49772  | 276,51 | 73,3             |
| chr5 | 140070333 | 140070512 | HARS     | NM_002109    | 13 | 13 | 2       | 90          | 794  | 32315  | 179,53 | 81,1             |
| chr5 | 140070840 | 140071058 | HARS     | NM_002109    | 13 | 13 | 1       | 90          | 190  | 7420   | 33,88  | 55,6             |
| chr5 | 140073135 | 140073308 | HARS2    | NM_012208    | 13 | 13 | 2       | 75          | 1182 | 48102  | 276,45 | 100              |
| chr5 | 140073479 | 140073833 | HARS2    | NM_012208    | 13 | 13 | 3,4     | 120,96      | 1342 | 59931  | 168,82 | 100.0,66.7       |
| chr5 | 140075036 | 140075707 | HARS2    | NM_012208    | 13 | 13 | 5,6,7   | 126,108,99  | 1723 | 83583  | 124,38 | 100.0,100.0,20.2 |
| chr5 | 140076013 | 140076216 | HARS2    | NM_012208    | 13 | 13 | 8       | 94          | 430  | 18950  | 92,89  | 100              |
| chr5 | 140076575 | 140077344 | HARS2    | NM_012208    | 13 | 13 | 9,10,11 | 128.243.117 | 2127 | 98281  | 127,64 | 63.3,100.0,100.0 |
| chr5 | 140077432 | 140077623 | HARS2    | NM_012208    | 13 | 13 | 12      | 147         | 280  | 12146  | 63,26  | 72,8             |
| chr5 | 140078094 | 140078273 | HARS2    | NM_012208    | 13 | 13 | 13      | 60          | 628  | 27873  | 154,85 | 73,3             |
| chr5 | 140896364 | 140896641 | DIAPH1   | NM_005219    | 28 | 28 | 28      | 158         | 895  | 40853  | 146,95 | 100              |
| chr5 | 140903694 | 140903891 | DIAPH1   | NM_005219    | 28 | 28 | 27      | 87          | 561  | 23429  | 118,33 | 100              |
| chr5 | 140905671 | 140906111 | DIAPH1   | NM_005219    | 28 | 28 | 26,25   | 136.165     | 629  | 28894  | 65,52  | 51.5,100.0       |
| chr5 | 140907038 | 140907235 | DIAPH1   | NM_005219    | 28 | 28 | 24      | 125         | 145  | 6561   | 33,14  | 76,8             |
| chr5 | 140908048 | 140908568 | DIAPH1   | NM_005219    | 28 | 28 | 23,22   | 130.240     | 1406 | 68003  | 130,52 | 78.5,100.0       |
| chr5 | 140908746 | 140908958 | DIAPH1   | NM_005219    | 28 | 28 | 21      | 102         | 487  | 21296  | 99,98  | 93,1             |
| chr5 | 140909158 | 140909337 | DIAPH1   | NM_005219    | 28 | 28 | 20      | 95          | 673  | 28303  | 157,24 | 100              |
| chr5 | 140913889 | 140914074 | DIAPH1   | NM_005219    | 28 | 28 | 19      | 99          | 148  | 6521   | 35,06  | 100              |
| chr5 | 140951433 | 140951642 | DIAPH1   | NM_005219    | 28 | 28 | 17      | 115         | 469  | 20507  | 97,65  | 100              |
| chr5 | 140953090 | 140953865 | DIAPH1   | NM_005219    | 28 | 28 | 16      | 717         | 809  | 38560  | 49,69  | 95,7             |
| chr5 | 140954583 | 140954780 | DIAPH1   | NM_005219    | 28 | 28 | 15      | 180         | 615  | 27348  | 138,12 | 72,8             |
| chr5 | 140955704 | 140955895 | DIAPH1   | NM_005219    | 28 | 28 | 14      | 65          | 228  | 9300   | 48,44  | 100              |
| chr5 | 140956235 | 140956453 | DIAPH1   | NM_005219    | 28 | 28 | 13      | 116         | 144  | 6119   | 27,94  | 100              |
| chr5 | 140956966 | 140957166 | DIAPH1   | NM_005219    | 28 | 28 | 12      | 117         | 200  | 9137   | 45,46  | 100              |
| chr5 | 140957834 | 140958277 | DIAPH1   | NM_005219    | 28 | 28 | 11,10   | 119.111     | 750  | 35127  | 79,11  | 64.7,100.0       |
| chr5 | 140958578 | 140958763 | DIAPH1   | NM_005219    | 28 | 28 | 9       | 109         | 409  | 16280  | 87,53  | 100              |
| chr5 | 140960268 | 140960477 | DIAPH1   | NM_005219    | 28 | 28 | 8       | 140         | 217  | 8743   | 41,63  | 100              |
| chr5 | 140961783 | 140961977 | DIAPH1   | NM_005219    | 28 | 28 | 7       | 64          | 456  | 19320  | 99,08  | 100              |
| chr5 | 140962784 | 140962975 | DIAPH1   | NM_005219    | 28 | 28 | 6       | 87          | 637  | 27852  | 145,06 | 87,4             |
| chr5 | 140963091 | 140963267 | DIAPH1   | NM_005219    | 28 | 28 | 5       | 131         | 745  | 33541  | 189,5  | 70,2             |
| chr5 | 140963599 | 140963826 | DIAPH1   | NM_005219    | 28 | 28 | 4       | 102         | 26   | 985    | 4,32   | 100              |
| chr5 | 140966586 | 140966792 | DIAPH1   | NM_005219    | 28 | 28 | 3       | 156         | 323  | 14020  | 67,73  | 100              |
| chr5 | 140967703 | 140967888 | DIAPH1   | NM_005219    | 28 | 28 | 2       | 27          | 39   | 1608   | 8,65   | 100              |
| chr5 | 140998307 | 140998572 | DIAPH1   | NM_005219    | 28 | 28 | 1       | 117         | 8    | 332    | 1,25   | 100              |
| chr5 | 145718663 | 145718863 | POU4F3   | NM_002700    | 2  | 2  | 1       | 120         | 1286 | 57198  | 284,57 | 100              |
| chr5 | 145719035 | 145720026 | POU4F3   | NM_002700    | 2  | 2  | 2       | 897         | 2505 | 119261 | 120,22 | 100              |
| chr5 | 169532895 | 169533483 | FOXI1    | NM_012188    | 2  | 2  | 1       | 574         | 243  | 11625  | 19,74  | 90,9             |
| chr5 | 169535043 | 169535732 | FOXI1    | NM_012188    | 2  | 2  | 2       | 563         | 2159 | 100301 | 145,36 | 100              |
| chr6 | 2948476   | 2948978   | SERPINB6 | NM_001195291 | 8  | 7  | 8       | 402         | 2963 | 139425 | 277,19 | 100              |
| chr6 | 2949143   | 2949370   | SERPINB6 | NM_001195291 | 8  | 7  | 7       | 156         | 638  | 27364  | 120,02 | 100              |
| chr6 | 2953260   | 2953439   | SERPINB6 | NM_001195291 | 8  | 7  | 6       | 143         | 1634 | 68115  | 378,42 | 100              |
| chr6 | 2954805   | 2955029   | SERPINB6 | NM_001195291 | 8  | 7  | 5       | 118         | 117  | 5294   | 23,53  | 100              |
| chr6 | 2955721   | 2955945   | SERPINB6 | NM_001195291 | 8  | 7  | 4       | 147         | 191  | 7830   | 34,8   | 100              |
| chr6 | 2959425   | 2959699   | SERPINB6 | NM_001195291 | 8  | 7  | 3       | 175         | 1116 | 50310  | 182,95 | 86,9             |
| chr6 | 33131353  | 33131547  | COL11A2  | NM_080680    | 66 | 66 | 66      | 141         | 70   | 2811   | 14,42  | 66               |
| chr6 | 33131986  | 33132171  | COL11A2  | NM_080680    | 66 | 66 | 65      | 207         | 540  | 23844  | 128,19 | 61,8             |
| chr6 | 33132638  | 33132853  | COL11A2  | NM_080680    | 66 | 66 | 64      | 113         | 752  | 31678  | 146,66 | 92               |

|      |          |          |         |              |    |    |                   |                   |      |        |        |                                    |
|------|----------|----------|---------|--------------|----|----|-------------------|-------------------|------|--------|--------|------------------------------------|
| chr6 | 33133392 | 33134005 | COL11A2 | NM_080680    | 66 | 66 | 63,62,61          | 268,54,36         | 1169 | 54019  | 87,98  | 75.4,100.0,100.0                   |
| chr6 | 33134191 | 33134566 | COL11A2 | NM_080680    | 66 | 66 | 60,59             | 54.108            | 2776 | 127971 | 340,35 | 100.0,64.8                         |
| chr6 | 33134749 | 33135281 | COL11A2 | NM_080680    | 66 | 66 | 58,57,56          | 54,54,108         | 595  | 26476  | 49,67  | 100.0,100.0,73.1                   |
| chr6 | 33135541 | 33135744 | COL11A2 | NM_080680    | 66 | 66 | 55                | 54                | 143  | 5809   | 28,48  | 100                                |
| chr6 | 33136272 | 33136549 | COL11A2 | NM_080680    | 66 | 66 | 54,53             | 54,54             | 202  | 9098   | 32,73  | 100.0,100.0                        |
| chr6 | 33136697 | 33136882 | COL11A2 | NM_080680    | 66 | 66 | 52                | 54                | 134  | 5403   | 29,05  | 100                                |
| chr6 | 33137062 | 33137247 | COL11A2 | NM_080680    | 66 | 66 | 51                | 108               | 386  | 16022  | 86,14  | 81,5                               |
| chr6 | 33137662 | 33137957 | COL11A2 | NM_080680    | 66 | 66 | 49                | 54                | 1119 | 52787  | 178,33 | 100                                |
| chr6 | 33138029 | 33138309 | COL11A2 | NM_080680    | 66 | 66 | 48                | 54                | 165  | 6950   | 24,73  | 100                                |
| chr6 | 33138609 | 33138800 | COL11A2 | NM_080680    | 66 | 66 | 46                | 108               | 93   | 4084   | 21,27  | 79,6                               |
| chr6 | 33138908 | 33139668 | COL11A2 | NM_080680    | 66 | 66 | 45,44,43,42       | 54,54,108,108     | 1354 | 64176  | 84,33  | 68.5,100.0,100.0,100.0             |
| chr6 | 33139795 | 33139983 | COL11A2 | NM_080680    | 66 | 66 | 41                | 54                | 362  | 16319  | 86,34  | 100                                |
| chr6 | 33140095 | 33140437 | COL11A2 | NM_080680    | 66 | 66 | 40,39             | 90.108            | 664  | 29549  | 86,15  | 67.8,100.0                         |
| chr6 | 33140802 | 33140993 | COL11A2 | NM_080680    | 66 | 66 | 38                | 54                | 120  | 5079   | 26,45  | 100                                |
| chr6 | 33141126 | 33142052 | COL11A2 | NM_080680    | 66 | 66 | 37,36,35,34,33,32 | 54,54,45,54,45,44 | 1800 | 86082  | 92,86  | 98.1,100.0,100.0,100.0,100.0,100.0 |
| chr6 | 33142158 | 33142355 | COL11A2 | NM_080680    | 66 | 66 | 31                | 54                | 89   | 3664   | 18,51  | 96,3                               |
| chr6 | 33143184 | 33143408 | COL11A2 | NM_080680    | 66 | 66 | 30                | 108               | 487  | 22291  | 99,07  | 53,7                               |
| chr6 | 33143794 | 33144214 | COL11A2 | NM_080680    | 66 | 66 | 29,28,27          | 54,45,54          | 1059 | 49012  | 116,42 | 98.1,100.0,9.3                     |
| chr6 | 33144389 | 33144595 | COL11A2 | NM_080680    | 66 | 66 | 26                | 45                | 337  | 14100  | 68,12  | 100                                |
| chr6 | 33144790 | 33145249 | COL11A2 | NM_080680    | 66 | 66 | 25,24,23          | 54,45,54          | 1568 | 72523  | 157,66 | 61.1,100.0,100.0                   |
| chr6 | 33145834 | 33146221 | COL11A2 | NM_080680    | 66 | 66 | 21,20,19          | 54,45,54          | 1097 | 43588  | 112,34 | 100.0,100.0,18.5                   |
| chr6 | 33146334 | 33146528 | COL11A2 | NM_080680    | 66 | 66 | 18                | 54                | 1710 | 76219  | 390,87 | 100                                |
| chr6 | 33146656 | 33147238 | COL11A2 | NM_080680    | 66 | 66 | 17,16,15,14       | 54,54,54,57       | 1020 | 41962  | 71,98  | 100.0,100.0,100.0,54.4             |
| chr6 | 33147504 | 33147698 | COL11A2 | NM_080680    | 66 | 66 | 13                | 87                | 87   | 3008   | 15,43  | 90,8                               |
| chr6 | 33147911 | 33148096 | COL11A2 | NM_080680    | 66 | 66 | 12                | 75                | 888  | 38518  | 207,09 | 82,7                               |
| chr6 | 33148438 | 33148623 | COL11A2 | NM_080680    | 66 | 66 | 11                | 63                | 203  | 8091   | 43,5   | 100                                |
| chr6 | 33148797 | 33148997 | COL11A2 | NM_080680    | 66 | 66 | 9                 | 60                | 888  | 38601  | 192,04 | 100                                |
| chr6 | 33151842 | 33152054 | COL11A2 | NM_080680    | 66 | 66 | 8                 | 180               | 644  | 27853  | 130,77 | 73,9                               |
| chr6 | 33152738 | 33152917 | COL11A2 | NM_080680    | 66 | 66 | 7                 | 63                | 46   | 1909   | 10,61  | 100                                |
| chr6 | 33153401 | 33153586 | COL11A2 | NM_080680    | 66 | 66 | 6                 | 78                | 60   | 2774   | 14,91  | 100                                |
| chr6 | 33154237 | 33154541 | COL11A2 | NM_080680    | 66 | 66 | 5                 | 192               | 349  | 15800  | 51,8   | 71,9                               |
| chr6 | 33156044 | 33156244 | COL11A2 | NM_080680    | 66 | 66 | 4                 | 163               | 261  | 11573  | 57,58  | 65                                 |
| chr6 | 33156725 | 33157218 | COL11A2 | NM_080680    | 66 | 66 | 3,2               | 211.150           | 729  | 34228  | 69,29  | 100.0,81.3                         |
| chr6 | 33159879 | 33160189 | COL11A2 | NM_080680    | 66 | 66 | 1                 | 82                | 19   | 726    | 2,33   | 100                                |
| chr6 | 35773383 | 35773900 | LHFPL5  | NM_182548    | 4  | 3  | 1                 | 412               | 3076 | 148194 | 286,09 | 100                                |
| chr6 | 35782348 | 35782640 | LHFPL5  | NM_182548    | 4  | 3  | 2                 | 237               | 1033 | 46426  | 158,45 | 89,5                               |
| chr6 | 35787061 | 35787258 | LHFPL5  | NM_182548    | 4  | 3  | 3                 | 11                | 360  | 15154  | 76,54  | 100                                |
| chr6 | 45870756 | 45871057 | CLIC5   | NM_001114086 | 6  | 6  | 6                 | 168               | 636  | 29975  | 99,25  | 100                                |
| chr6 | 45882021 | 45882212 | CLIC5   | NM_001114086 | 6  | 6  | 5                 | 182               | 300  | 13475  | 70,18  | 69,2                               |
| chr6 | 45909305 | 45909508 | CLIC5   | NM_001114086 | 6  | 6  | 4                 | 107               | 75   | 2748   | 13,47  | 80,4                               |
| chr6 | 45916892 | 45917080 | CLIC5   | NM_001114086 | 6  | 6  | 3                 | 126               | 1090 | 48508  | 256,66 | 69,8                               |
| chr6 | 45922781 | 45922954 | CLIC5   | NM_001114086 | 6  | 6  | 2                 | 110               | 71   | 3271   | 18,8   | 75,5                               |
| chr6 | 46047445 | 46048042 | CLIC5   | NM_001114086 | 6  | 6  | 1                 | 540               | 1046 | 50121  | 83,81  | 99,1                               |
| chr6 | 70926525 | 70926719 | COL9A1  | NM_001851    | 38 | 38 | 38                | 185               | 220  | 9422   | 48,32  | 64,9                               |
| chr6 | 70935543 | 70935758 | COL9A1  | NM_001851    | 38 | 38 | 37                | 78                | 505  | 22591  | 104,59 | 100                                |
| chr6 | 70942351 | 70942536 | COL9A1  | NM_001851    | 38 | 38 | 36                | 189               | 125  | 5430   | 29,19  | 65,6                               |
| chr6 | 70944183 | 70944368 | COL9A1  | NM_001851    | 38 | 38 | 35                | 55                | 656  | 27156  | 146    | 100                                |
| chr6 | 70944544 | 70944732 | COL9A1  | NM_001851    | 38 | 38 | 34                | 147               | 271  | 12522  | 66,25  | 68                                 |
| chr6 | 70948932 | 70949132 | COL9A1  | NM_001851    | 38 | 38 | 33                | 33                | 95   | 4404   | 21,91  | 100                                |
| chr6 | 70950385 | 70950588 | COL9A1  | NM_001851    | 38 | 38 | 32                | 45                | 856  | 39403  | 193,15 | 100                                |
| chr6 | 70950976 | 70951170 | COL9A1  | NM_001851    | 38 | 38 | 31                | 36                | 1299 | 58653  | 300,78 | 100                                |

|      |          |          |        |           |    |    |          |          |      |       |        |                  |
|------|----------|----------|--------|-----------|----|----|----------|----------|------|-------|--------|------------------|
| chr6 | 70951542 | 70951727 | COL9A1 | NM_001851 | 38 | 38 | 30       | 72       | 540  | 21664 | 116,47 | 84,7             |
| chr6 | 70952291 | 70952485 | COL9A1 | NM_001851 | 38 | 38 | 29       | 54       | 317  | 13197 | 67,68  | 100              |
| chr6 | 70961877 | 70962068 | COL9A1 | NM_001851 | 38 | 38 | 27       | 54       | 434  | 18880 | 98,33  | 100              |
| chr6 | 70963019 | 70963195 | COL9A1 | NM_001851 | 38 | 38 | 26       | 45       | 429  | 16849 | 95,19  | 100              |
| chr6 | 70964135 | 70964332 | COL9A1 | NM_001851 | 38 | 38 | 25       | 54       | 296  | 12581 | 63,54  | 100              |
| chr6 | 70964689 | 70965132 | COL9A1 | NM_001851 | 38 | 38 | 24,23,22 | 54,54,54 | 936  | 43281 | 97,48  | 57.4,100.0,100.0 |
| chr6 | 70966388 | 70966609 | COL9A1 | NM_001851 | 38 | 38 | 21       | 54       | 193  | 8327  | 37,51  | 100              |
| chr6 | 70970295 | 70970489 | COL9A1 | NM_001851 | 38 | 38 | 20       | 54       | 328  | 13039 | 66,87  | 100              |
| chr6 | 70972879 | 70973073 | COL9A1 | NM_001851 | 38 | 38 | 19       | 54       | 402  | 16924 | 86,79  | 100              |
| chr6 | 70976364 | 70976570 | COL9A1 | NM_001851 | 38 | 38 | 18       | 54       | 439  | 19790 | 95,6   | 100              |
| chr6 | 70978380 | 70978562 | COL9A1 | NM_001851 | 38 | 38 | 17       | 57       | 718  | 30584 | 167,13 | 98,2             |
| chr6 | 70979179 | 70979391 | COL9A1 | NM_001851 | 38 | 38 | 16       | 33       | 387  | 15924 | 74,76  | 100              |
| chr6 | 70979928 | 70980158 | COL9A1 | NM_001851 | 38 | 38 | 15       | 54       | 142  | 5855  | 25,35  | 100              |
| chr6 | 70981271 | 70981483 | COL9A1 | NM_001851 | 38 | 38 | 14       | 54       | 413  | 19327 | 90,74  | 100              |
| chr6 | 70981613 | 70981804 | COL9A1 | NM_001851 | 38 | 38 | 13       | 24       | 172  | 7369  | 38,38  | 100              |
| chr6 | 70983667 | 70983852 | COL9A1 | NM_001851 | 38 | 38 | 12       | 36       | 402  | 18228 | 98     | 100              |
| chr6 | 70984354 | 70984551 | COL9A1 | NM_001851 | 38 | 38 | 11       | 54       | 327  | 14756 | 74,53  | 100              |
| chr6 | 70990554 | 70990843 | COL9A1 | NM_001851 | 38 | 38 | 10,9     | 63,36    | 622  | 27551 | 95     | 38.1,100.0       |
| chr6 | 70990997 | 70991200 | COL9A1 | NM_001851 | 38 | 38 | 8        | 75       | 255  | 11051 | 54,17  | 100              |
| chr6 | 70992566 | 70992861 | COL9A1 | NM_001851 | 38 | 38 | 7        | 21       | 383  | 17429 | 58,88  | 100              |
| chr6 | 70993441 | 70993644 | COL9A1 | NM_001851 | 38 | 38 | 6        | 84       | 88   | 3539  | 17,35  | 98,8             |
| chr6 | 71003847 | 71004281 | COL9A1 | NM_001851 | 38 | 38 | 5        | 397      | 1290 | 58192 | 133,77 | 100              |
| chr6 | 71009731 | 71010103 | COL9A1 | NM_001851 | 38 | 38 | 4,3      | 133,78   | 630  | 27781 | 74,48  | 100.0,100.0      |
| chr6 | 71011655 | 71011855 | COL9A1 | NM_001851 | 38 | 38 | 2        | 74       | 87   | 3274  | 16,29  | 100              |
| chr6 | 71012538 | 71012723 | COL9A1 | NM_001851 | 38 | 38 | 1        | 14       | 1316 | 55032 | 295,87 | 100              |
| chr6 | 76527197 | 76527415 | MYO6   | NM_004999 | 35 | 34 | 2        | 117      | 362  | 15094 | 68,92  | 100              |
| chr6 | 76532421 | 76532618 | MYO6   | NM_004999 | 35 | 34 | 3        | 70       | 223  | 9968  | 50,34  | 100              |
| chr6 | 76538247 | 76538462 | MYO6   | NM_004999 | 35 | 34 | 4        | 74       | 198  | 8727  | 40,4   | 100              |
| chr6 | 76540130 | 76540312 | MYO6   | NM_004999 | 35 | 34 | 5        | 130      | 135  | 5820  | 31,8   | 100              |
| chr6 | 76542523 | 76542702 | MYO6   | NM_004999 | 35 | 34 | 6        | 106      | 120  | 5206  | 28,92  | 100              |
| chr6 | 76545620 | 76545808 | MYO6   | NM_004999 | 35 | 34 | 7        | 56       | 446  | 17690 | 93,6   | 96,4             |
| chr6 | 76550226 | 76550420 | MYO6   | NM_004999 | 35 | 34 | 8        | 98       | 449  | 19856 | 101,83 | 100              |
| chr6 | 76550927 | 76551103 | MYO6   | NM_004999 | 35 | 34 | 9        | 165      | 159  | 6418  | 36,26  | 100              |
| chr6 | 76554520 | 76554723 | MYO6   | NM_004999 | 35 | 34 | 10       | 81       | 110  | 4673  | 22,91  | 100              |
| chr6 | 76558081 | 76558278 | MYO6   | NM_004999 | 35 | 34 | 11       | 181      | 335  | 14992 | 75,72  | 92,8             |
| chr6 | 76564854 | 76565051 | MYO6   | NM_004999 | 35 | 34 | 12       | 145      | 302  | 11939 | 60,3   | 100              |
| chr6 | 76566744 | 76566935 | MYO6   | NM_004999 | 35 | 34 | 13       | 158      | 343  | 14992 | 78,08  | 77,2             |
| chr6 | 76568624 | 76568836 | MYO6   | NM_004999 | 35 | 34 | 14       | 92       | 176  | 7322  | 34,38  | 94,6             |
| chr6 | 76570738 | 76570947 | MYO6   | NM_004999 | 35 | 34 | 15       | 73       | 296  | 11976 | 57,03  | 100              |
| chr6 | 76572315 | 76572506 | MYO6   | NM_004999 | 35 | 34 | 16       | 128      | 532  | 23199 | 120,83 | 98,4             |
| chr6 | 76576214 | 76576426 | MYO6   | NM_004999 | 35 | 34 | 17       | 96       | 490  | 20510 | 96,29  | 100              |
| chr6 | 76576563 | 76576766 | MYO6   | NM_004999 | 35 | 34 | 18       | 174      | 381  | 15819 | 77,54  | 67,8             |
| chr6 | 76580213 | 76580407 | MYO6   | NM_004999 | 35 | 34 | 19       | 39       | 556  | 22077 | 113,22 | 100              |
| chr6 | 76582915 | 76583085 | MYO6   | NM_004999 | 35 | 34 | 20       | 94       | 129  | 5711  | 33,4   | 100              |
| chr6 | 76589449 | 76589818 | MYO6   | NM_004999 | 35 | 34 | 21,22    | 131,78   | 701  | 33012 | 89,22  | 100.0,75.6       |
| chr6 | 76591376 | 76591576 | MYO6   | NM_004999 | 35 | 34 | 23       | 130      | 298  | 13065 | 65     | 100              |
| chr6 | 76595740 | 76595910 | MYO6   | NM_004999 | 35 | 34 | 24       | 91       | 101  | 4280  | 25,03  | 79,1             |
| chr6 | 76596535 | 76596735 | MYO6   | NM_004999 | 35 | 34 | 25       | 151      | 205  | 8586  | 42,72  | 100              |
| chr6 | 76599768 | 76599971 | MYO6   | NM_004999 | 35 | 34 | 26       | 209      | 43   | 1776  | 8,71   | 94,7             |
| chr6 | 76600811 | 76601038 | MYO6   | NM_004999 | 35 | 34 | 27       | 79       | 31   | 1078  | 4,73   | 100              |
| chr6 | 76602158 | 76602379 | MYO6   | NM_004999 | 35 | 34 | 28       | 161      | 136  | 5935  | 26,73  | 82,6             |

|      |           |           |       |           |    |    |       |         |      |       |        |             |
|------|-----------|-----------|-------|-----------|----|----|-------|---------|------|-------|--------|-------------|
| chr6 | 76604871  | 76605056  | MYO6  | NM_004999 | 35 | 34 | 29    | 30      | 98   | 4380  | 23,55  | 100         |
| chr6 | 76608047  | 76608241  | MYO6  | NM_004999 | 35 | 34 | 30    | 39      | 136  | 5971  | 30,62  | 100         |
| chr6 | 76617243  | 76617443  | MYO6  | NM_004999 | 35 | 34 | 31    | 104     | 130  | 5200  | 25,87  | 100         |
| chr6 | 76618193  | 76618372  | MYO6  | NM_004999 | 35 | 34 | 32    | 132     | 181  | 7969  | 44,27  | 100         |
| chr6 | 76621229  | 76621450  | MYO6  | NM_004999 | 35 | 34 | 33    | 27      | 480  | 19621 | 88,38  | 100         |
| chr6 | 76623820  | 76624076  | MYO6  | NM_004999 | 35 | 34 | 34    | 219     | 594  | 27517 | 107,07 | 81,7        |
| chr6 | 76624513  | 76624823  | MYO6  | NM_004999 | 35 | 34 | 35    | 200     | 1067 | 47941 | 154,15 | 100         |
| chr6 | 133595812 | 133596003 | EYA4  | NM_004100 | 20 | 19 | 2     | 33      | 108  | 4632  | 24,13  | 100         |
| chr6 | 133703514 | 133703714 | EYA4  | NM_004100 | 20 | 19 | 3     | 50      | 579  | 24520 | 121,99 | 100         |
| chr6 | 133767714 | 133767938 | EYA4  | NM_004100 | 20 | 19 | 4     | 125     | 604  | 26043 | 115,75 | 100         |
| chr6 | 133769158 | 133769337 | EYA4  | NM_004100 | 20 | 19 | 5     | 69      | 562  | 24273 | 134,85 | 100         |
| chr6 | 133777579 | 133777767 | EYA4  | NM_004100 | 20 | 19 | 6     | 93      | 563  | 23314 | 123,35 | 79,6        |
| chr6 | 133782181 | 133782384 | EYA4  | NM_004100 | 20 | 19 | 7     | 67      | 674  | 27848 | 136,51 | 100         |
| chr6 | 133783416 | 133783832 | EYA4  | NM_004100 | 20 | 19 | 8,9   | 143.144 | 1530 | 73444 | 176,12 | 100.0,51.4  |
| chr6 | 133785901 | 133786089 | EYA4  | NM_004100 | 20 | 19 | 10    | 80      | 412  | 17623 | 93,24  | 100         |
| chr6 | 133789724 | 133789924 | EYA4  | NM_004100 | 20 | 19 | 11    | 166     | 873  | 39351 | 195,78 | 88          |
| chr6 | 133802553 | 133802783 | EYA4  | NM_004100 | 20 | 19 | 12    | 137     | 630  | 28596 | 123,79 | 100         |
| chr6 | 133804120 | 133804296 | EYA4  | NM_004100 | 20 | 19 | 13    | 84      | 244  | 10672 | 60,29  | 100         |
| chr6 | 133827137 | 133827316 | EYA4  | NM_004100 | 20 | 19 | 14    | 90      | 485  | 20344 | 113,02 | 81,1        |
| chr6 | 133833846 | 133834200 | EYA4  | NM_004100 | 20 | 19 | 15,16 | 59.161  | 607  | 27449 | 77,32  | 100.0,100.0 |
| chr6 | 133836391 | 133836600 | EYA4  | NM_004100 | 20 | 19 | 17    | 115     | 167  | 6549  | 31,19  | 100         |
| chr6 | 133844193 | 133844390 | EYA4  | NM_004100 | 20 | 19 | 18    | 122     | 342  | 14838 | 74,94  | 100         |
| chr6 | 133846195 | 133846469 | EYA4  | NM_004100 | 20 | 19 | 19    | 101     | 500  | 22582 | 82,12  | 100         |
| chr6 | 133849835 | 133850118 | EYA4  | NM_004100 | 20 | 19 | 20    | 81      | 328  | 14693 | 51,74  | 100         |
| chr7 | 5567471   | 5567641   | ACTB  | NM_001101 | 6  | 5  | 6,5   | 144.182 | 42   | 1139  | 6,66   | 36.1,3.8    |
| chr7 | 5567782   | 5567961   | ACTB  | NM_001101 | 6  | 5  | 5,4   | 182.439 | 471  | 18948 | 105,27 | 19.2,11.4   |
| chr7 | 5568271   | 5568391   | ACTB  | NM_001101 | 6  | 5  | 4     | 439     | 98   | 3998  | 33,04  | 18,2        |
| chr7 | 5569000   | 5569170   | ACTB  | NM_001101 | 6  | 5  | 3,2   | 240.123 | 150  | 5921  | 34,63  | 13.3,4.1    |
| chr7 | 5569234   | 5569511   | ACTB  | NM_001101 | 6  | 5  | 2     | 123     | 29   | 1176  | 4,23   | 44,7        |
| chr7 | 24738558  | 24738912  | DFNA5 | NM_004403 | 10 | 9  | 10    | 234     | 557  | 24457 | 68,89  | 100         |
| chr7 | 24742224  | 24742433  | DFNA5 | NM_004403 | 10 | 9  | 9     | 74      | 1172 | 50374 | 239,88 | 74,3        |
| chr7 | 24745732  | 24745932  | DFNA5 | NM_004403 | 10 | 9  | 8     | 193     | 120  | 5542  | 27,57  | 67,4        |
| chr7 | 24747766  | 24747984  | DFNA5 | NM_004403 | 10 | 9  | 7     | 128     | 419  | 17314 | 79,06  | 84,4        |
| chr7 | 24749848  | 24750057  | DFNA5 | NM_004403 | 10 | 9  | 6     | 165     | 114  | 5213  | 24,82  | 97          |
| chr7 | 24756429  | 24756973  | DFNA5 | NM_004403 | 10 | 9  | 5     | 121     | 2242 | 98470 | 180,68 | 83,5        |
| chr7 | 24758726  | 24758905  | DFNA5 | NM_004403 | 10 | 9  | 4     | 172     | 214  | 9372  | 52,07  | 65,1        |
| chr7 | 24784103  | 24784330  | DFNA5 | NM_004403 | 10 | 9  | 3     | 193     | 1022 | 44450 | 194,96 | 77,7        |
| chr7 | 24789126  | 24789406  | DFNA5 | NM_004403 | 10 | 9  | 2     | 211     | 307  | 14192 | 50,51  | 100         |
| chr7 | 81331777  | 81332113  | HGF   | NM_000601 | 18 | 18 | 18    | 177     | 1292 | 60688 | 180,08 | 100         |
| chr7 | 81334698  | 81335067  | HGF   | NM_000601 | 18 | 18 | 17,16 | 146.107 | 1052 | 47573 | 128,58 | 100.0,98.1  |
| chr7 | 81335563  | 81335760  | HGF   | NM_000601 | 18 | 18 | 15    | 141     | 323  | 13376 | 67,56  | 100         |
| chr7 | 81336548  | 81336739  | HGF   | NM_000601 | 18 | 18 | 14    | 75      | 640  | 27142 | 141,36 | 100         |
| chr7 | 81339368  | 81339580  | HGF   | NM_000601 | 18 | 18 | 13    | 97      | 494  | 21929 | 102,95 | 100         |
| chr7 | 81340718  | 81340900  | HGF   | NM_000601 | 18 | 18 | 12    | 39      | 124  | 4668  | 25,51  | 100         |
| chr7 | 81346541  | 81346753  | HGF   | NM_000601 | 18 | 18 | 11    | 134     | 1244 | 54049 | 253,75 | 100         |
| chr7 | 81349990  | 81350175  | HGF   | NM_000601 | 18 | 18 | 10    | 103     | 603  | 24465 | 131,53 | 100         |
| chr7 | 81355244  | 81355414  | HGF   | NM_000601 | 18 | 18 | 9     | 128     | 412  | 17294 | 101,13 | 70,3        |
| chr7 | 81358895  | 81359119  | HGF   | NM_000601 | 18 | 18 | 8     | 175     | 168  | 7517  | 33,41  | 100         |
| chr7 | 81372579  | 81372767  | HGF   | NM_000601 | 18 | 18 | 7     | 119     | 614  | 25944 | 137,27 | 83,2        |
| chr7 | 81374275  | 81374472  | HGF   | NM_000601 | 18 | 18 | 6     | 121     | 879  | 35846 | 181,04 | 100         |
| chr7 | 81381342  | 81381625  | HGF   | NM_000601 | 18 | 18 | 5     | 143     | 593  | 27965 | 98,47  | 100         |

|      |           |           |         |           |    |    |       |         |      |       |        |            |
|------|-----------|-----------|---------|-----------|----|----|-------|---------|------|-------|--------|------------|
| chr7 | 81386370  | 81386641  | HGF     | NM_000601 | 18 | 18 | 4     | 115     | 895  | 42244 | 155,31 | 100        |
| chr7 | 81387972  | 81388154  | HGF     | NM_000601 | 18 | 18 | 3     | 113     | 196  | 7744  | 42,32  | 100        |
| chr7 | 81392017  | 81392190  | HGF     | NM_000601 | 18 | 18 | 2     | 166     | 668  | 28937 | 166,3  | 100        |
| chr7 | 81399133  | 81399440  | HGF     | NM_000601 | 18 | 18 | 1     | 88      | 178  | 8480  | 27,53  | 100        |
| chr7 | 102993220 | 102993441 | SLC26A5 | NM_206883 | 20 | 18 | 20    | 17      | 728  | 32438 | 146,12 | 100        |
| chr7 | 103017175 | 103017369 | SLC26A5 | NM_206883 | 20 | 18 | 19    | 55      | 433  | 18718 | 95,99  | 100        |
| chr7 | 103017987 | 103018181 | SLC26A5 | NM_206883 | 20 | 18 | 18    | 201     | 286  | 12663 | 64,94  | 67,7       |
| chr7 | 103018786 | 103018971 | SLC26A5 | NM_206883 | 20 | 18 | 17    | 108     | 667  | 27534 | 148,03 | 73,1       |
| chr7 | 103019575 | 103019760 | SLC26A5 | NM_206883 | 20 | 18 | 16    | 93      | 940  | 41706 | 224,23 | 76,3       |
| chr7 | 103020825 | 103021037 | SLC26A5 | NM_206883 | 20 | 18 | 15    | 70      | 705  | 31701 | 148,83 | 100        |
| chr7 | 103029482 | 103029667 | SLC26A5 | NM_206883 | 20 | 18 | 14    | 107     | 649  | 26016 | 139,87 | 74,8       |
| chr7 | 103029672 | 103029857 | SLC26A5 | NM_206883 | 20 | 18 | 13    | 96      | 544  | 19168 | 103,05 | 85,4       |
| chr7 | 103030820 | 103031002 | SLC26A5 | NM_206883 | 20 | 18 | 12    | 78      | 317  | 13860 | 75,74  | 100        |
| chr7 | 103032010 | 103032237 | SLC26A5 | NM_206883 | 20 | 18 | 11    | 114     | 233  | 10546 | 46,25  | 100        |
| chr7 | 103033285 | 103033467 | SLC26A5 | NM_206883 | 20 | 18 | 10    | 148     | 27   | 1175  | 6,42   | 68,9       |
| chr7 | 103038319 | 103038504 | SLC26A5 | NM_206883 | 20 | 18 | 9     | 83      | 460  | 19758 | 106,23 | 100        |
| chr7 | 103048240 | 103048449 | SLC26A5 | NM_206883 | 20 | 18 | 8     | 153     | 416  | 18468 | 87,94  | 99,3       |
| chr7 | 103050756 | 103050938 | SLC26A5 | NM_206883 | 20 | 18 | 7     | 165     | 234  | 10123 | 55,32  | 64,8       |
| chr7 | 103051921 | 103052100 | SLC26A5 | NM_206883 | 20 | 18 | 6     | 167     | 556  | 23215 | 128,97 | 67,7       |
| chr7 | 103053466 | 103053663 | SLC26A5 | NM_206883 | 20 | 18 | 5     | 111     | 207  | 9057  | 45,74  | 84,7       |
| chr7 | 103061094 | 103061309 | SLC26A5 | NM_206883 | 20 | 18 | 4     | 140     | 494  | 22261 | 103,06 | 89,3       |
| chr7 | 103061864 | 103062067 | SLC26A5 | NM_206883 | 20 | 18 | 3     | 152     | 885  | 39374 | 193,01 | 64,5       |
| chr7 | 107302031 | 107302249 | SLC26A4 | NM_000441 | 21 | 20 | 2     | 164     | 45   | 1753  | 8      | 99,4       |
| chr7 | 107303650 | 107303844 | SLC26A4 | NM_000441 | 21 | 20 | 3     | 140     | 168  | 7203  | 36,94  | 74,3       |
| chr7 | 107312492 | 107312704 | SLC26A4 | NM_000441 | 21 | 20 | 4     | 111     | 309  | 13101 | 61,51  | 100        |
| chr7 | 107314627 | 107314830 | SLC26A4 | NM_000441 | 21 | 20 | 5     | 185     | 132  | 6053  | 29,67  | 90,3       |
| chr7 | 107315347 | 107315556 | SLC26A4 | NM_000441 | 21 | 20 | 6     | 165     | 402  | 17916 | 85,31  | 100        |
| chr7 | 107323688 | 107324039 | SLC26A4 | NM_000441 | 21 | 20 | 7,8   | 153,83  | 486  | 22211 | 63,1   | 73.2,100.0 |
| chr7 | 107329405 | 107329602 | SLC26A4 | NM_000441 | 21 | 20 | 9     | 148     | 382  | 15630 | 78,94  | 70,9       |
| chr7 | 107330465 | 107330650 | SLC26A4 | NM_000441 | 21 | 20 | 10    | 114     | 946  | 43646 | 234,66 | 71,9       |
| chr7 | 107334896 | 107335244 | SLC26A4 | NM_000441 | 21 | 20 | 11,12 | 78,96   | 2038 | 90968 | 260,65 | 38.5,100.0 |
| chr7 | 107336348 | 107336557 | SLC26A4 | NM_000441 | 21 | 20 | 13    | 107     | 301  | 13422 | 63,91  | 100        |
| chr7 | 107338463 | 107338651 | SLC26A4 | NM_000441 | 21 | 20 | 14    | 70      | 337  | 13817 | 73,11  | 100        |
| chr7 | 107340407 | 107340622 | SLC26A4 | NM_000441 | 21 | 20 | 15    | 93      | 487  | 20993 | 97,19  | 100        |
| chr7 | 107341487 | 107341696 | SLC26A4 | NM_000441 | 21 | 20 | 16    | 96      | 135  | 5641  | 26,86  | 100        |
| chr7 | 107342282 | 107342559 | SLC26A4 | NM_000441 | 21 | 20 | 17    | 231     | 647  | 29648 | 106,65 | 95,7       |
| chr7 | 107344774 | 107344971 | SLC26A4 | NM_000441 | 21 | 20 | 18    | 55      | 385  | 15471 | 78,14  | 100        |
| chr7 | 107350456 | 107350641 | SLC26A4 | NM_000441 | 21 | 20 | 19    | 146     | 441  | 18855 | 101,37 | 97,9       |
| chr7 | 107352859 | 107353050 | SLC26A4 | NM_000441 | 21 | 20 | 20    | 84      | 208  | 8603  | 44,81  | 79,8       |
| chr7 | 107355869 | 107356078 | SLC26A4 | NM_000441 | 21 | 20 | 21    | 24      | 380  | 16029 | 76,33  | 95,8       |
| chr7 | 129414527 | 129414866 | MIR96   | NR_029512 | 1  | 0  | 1     | 77      | 324  | 15075 | 44,34  | 100        |
| chr8 | 49831298  | 49831599  | SNAI2   | NM_003068 | 3  | 3  | 3     | 182     | 1787 | 85133 | 281,9  | 100        |
| chr8 | 49832418  | 49833042  | SNAI2   | NM_003068 | 3  | 3  | 2     | 546     | 583  | 27331 | 43,73  | 100        |
| chr8 | 49833696  | 49834000  | SNAI2   | NM_003068 | 3  | 3  | 1     | 79      | 47   | 2047  | 6,71   | 100        |
| chr8 | 72111422  | 72111637  | EYA1    | NM_000503 | 18 | 16 | 18    | 81      | 381  | 16060 | 74,35  | 77,8       |
| chr8 | 72123322  | 72123498  | EYA1    | NM_000503 | 18 | 16 | 17    | 101     | 1064 | 45543 | 257,31 | 100        |
| chr8 | 72127567  | 72127897  | EYA1    | NM_000503 | 18 | 16 | 16,15 | 122.115 | 343  | 15020 | 45,38  | 100.0,42.6 |
| chr8 | 72128840  | 72129218  | EYA1    | NM_000503 | 18 | 16 | 14,13 | 161,59  | 1145 | 52852 | 139,45 | 100.0,32.2 |
| chr8 | 72156857  | 72157048  | EYA1    | NM_000503 | 18 | 16 | 12    | 90      | 886  | 36464 | 189,92 | 78,9       |
| chr8 | 72181916  | 72182128  | EYA1    | NM_000503 | 18 | 16 | 11    | 84      | 618  | 27691 | 130    | 100        |
| chr8 | 72183989  | 72184207  | EYA1    | NM_000503 | 18 | 16 | 10    | 140     | 628  | 27831 | 127,08 | 100        |



|      |           |           |          |           |    |    |     |         |      |        |        |            |
|------|-----------|-----------|----------|-----------|----|----|-----|---------|------|--------|--------|------------|
| chr8 | 72211337  | 72211534  | EYA1     | NM_000503 | 18 | 16 | 9   | 187     | 386  | 16978  | 85,75  | 70,6       |
| chr8 | 72211888  | 72212085  | EYA1     | NM_000503 | 18 | 16 | 8   | 83      | 462  | 20101  | 101,52 | 81,9       |
| chr8 | 72229704  | 72229880  | EYA1     | NM_000503 | 18 | 16 | 7   | 138     | 878  | 37361  | 211,08 | 68,1       |
| chr8 | 72234026  | 72234211  | EYA1     | NM_000503 | 18 | 16 | 6   | 146     | 261  | 10266  | 55,19  | 61         |
| chr8 | 72234383  | 72234559  | EYA1     | NM_000503 | 18 | 16 | 5   | 70      | 63   | 2835   | 16,02  | 100        |
| chr8 | 72246281  | 72246549  | EYA1     | NM_000503 | 18 | 16 | 4   | 78      | 608  | 27053  | 100,57 | 100        |
| chr8 | 72267036  | 72267239  | EYA1     | NM_000503 | 18 | 16 | 3   | 124     | 1522 | 61853  | 303,2  | 84,7       |
| chr8 | 72268644  | 72268853  | EYA1     | NM_000503 | 18 | 16 | 2   | 50      | 314  | 14176  | 67,5   | 100        |
| chr8 | 102504793 | 102505094 | GRHL2    | NM_024915 | 16 | 16 | 1   | 20      | 1141 | 52818  | 174,89 | 100        |
| chr8 | 102555506 | 102555881 | GRHL2    | NM_024915 | 16 | 16 | 2   | 196     | 1726 | 78785  | 209,53 | 81,1       |
| chr8 | 102564951 | 102565142 | GRHL2    | NM_024915 | 16 | 16 | 3   | 68      | 152  | 6491   | 33,81  | 88,2       |
| chr8 | 102570548 | 102571012 | GRHL2    | NM_024915 | 16 | 16 | 4   | 394     | 910  | 43236  | 92,98  | 92,9       |
| chr8 | 102582509 | 102582697 | GRHL2    | NM_024915 | 16 | 16 | 5   | 56      | 261  | 11341  | 60,01  | 100        |
| chr8 | 102585959 | 102586159 | GRHL2    | NM_024915 | 16 | 16 | 6   | 157     | 412  | 18077  | 89,94  | 59,9       |
| chr8 | 102589582 | 102589785 | GRHL2    | NM_024915 | 16 | 16 | 7   | 112     | 425  | 19266  | 94,44  | 100        |
| chr8 | 102611273 | 102611461 | GRHL2    | NM_024915 | 16 | 16 | 8   | 95      | 638  | 28356  | 150,03 | 100        |
| chr8 | 102631715 | 102631921 | GRHL2    | NM_024915 | 16 | 16 | 9   | 159     | 309  | 12239  | 59,13  | 97,5       |
| chr8 | 102643757 | 102643942 | GRHL2    | NM_024915 | 16 | 16 | 10  | 88      | 546  | 24441  | 131,4  | 88,6       |
| chr8 | 102644351 | 102644575 | GRHL2    | NM_024915 | 16 | 16 | 11  | 140     | 148  | 5738   | 25,5   | 87,1       |
| chr8 | 102649040 | 102649228 | GRHL2    | NM_024915 | 16 | 16 | 12  | 32      | 387  | 17001  | 89,95  | 100        |
| chr8 | 102656257 | 102656445 | GRHL2    | NM_024915 | 16 | 16 | 13  | 95      | 242  | 9882   | 52,29  | 91,6       |
| chr8 | 102661629 | 102661850 | GRHL2    | NM_024915 | 16 | 16 | 14  | 86      | 762  | 32321  | 145,59 | 100        |
| chr8 | 102676628 | 102676804 | GRHL2    | NM_024915 | 16 | 16 | 15  | 65      | 89   | 4170   | 23,56  | 100        |
| chr8 | 102678825 | 102679037 | GRHL2    | NM_024915 | 16 | 16 | 16  | 115     | 635  | 26665  | 125,19 | 93         |
| chr9 | 71789132  | 71789406  | TJP2     | NM_004817 | 23 | 23 | 1   | 60      | 25   | 1077   | 3,92   | 100        |
| chr9 | 71827399  | 71827584  | TJP2     | NM_004817 | 23 | 23 | 2   | 54      | 440  | 18233  | 98,03  | 100        |
| chr9 | 71831171  | 71831344  | TJP2     | NM_004817 | 23 | 23 | 3   | 125     | 302  | 12665  | 72,79  | 72         |
| chr9 | 71833247  | 71833432  | TJP2     | NM_004817 | 23 | 23 | 4   | 103     | 224  | 9725   | 52,28  | 28,2       |
| chr9 | 71835732  | 71836335  | TJP2     | NM_004817 | 23 | 23 | 5   | 610     | 332  | 14298  | 23,67  | 87,4       |
| chr9 | 71840153  | 71840326  | TJP2     | NM_004817 | 23 | 23 | 6   | 104     | 194  | 7049   | 40,51  | 100        |
| chr9 | 71840923  | 71841102  | TJP2     | NM_004817 | 23 | 23 | 7   | 154     | 246  | 9940   | 55,22  | 100        |
| chr9 | 71842660  | 71842990  | TJP2     | NM_004817 | 23 | 23 | 8,9 | 109.134 | 442  | 19312  | 58,34  | 100.0,70.1 |
| chr9 | 71844056  | 71844265  | TJP2     | NM_004817 | 23 | 23 | 10  | 67      | 1183 | 53626  | 255,36 | 100        |
| chr9 | 71844918  | 71845097  | TJP2     | NM_004817 | 23 | 23 | 11  | 151     | 431  | 17953  | 99,74  | 66,2       |
| chr9 | 71849320  | 71849493  | TJP2     | NM_004817 | 23 | 23 | 12  | 109     | 173  | 7026   | 40,38  | 100        |
| chr9 | 71850885  | 71851088  | TJP2     | NM_004817 | 23 | 23 | 13  | 211     | 496  | 21554  | 105,66 | 68,7       |
| chr9 | 71851783  | 71851992  | TJP2     | NM_004817 | 23 | 23 | 14  | 188     | 211  | 9283   | 44,2   | 68,1       |
| chr9 | 71852705  | 71852914  | TJP2     | NM_004817 | 23 | 23 | 15  | 96      | 147  | 6653   | 31,68  | 100        |
| chr9 | 71853574  | 71853756  | TJP2     | NM_004817 | 23 | 23 | 16  | 80      | 120  | 5240   | 28,63  | 100        |
| chr9 | 71854815  | 71855024  | TJP2     | NM_004817 | 23 | 23 | 17  | 211     | 349  | 15563  | 74,11  | 81,5       |
| chr9 | 71861575  | 71861760  | TJP2     | NM_004817 | 23 | 23 | 18  | 101     | 297  | 13554  | 72,87  | 100        |
| chr9 | 71862960  | 71863341  | TJP2     | NM_004817 | 23 | 23 | 19  | 213     | 484  | 22195  | 58,1   | 85         |
| chr9 | 71864182  | 71864370  | TJP2     | NM_004817 | 23 | 23 | 20  | 111     | 440  | 19536  | 103,37 | 72,1       |
| chr9 | 71865989  | 71866370  | TJP2     | NM_004817 | 23 | 23 | 21  | 330     | 851  | 39954  | 104,59 | 88,5       |
| chr9 | 71867617  | 71867802  | TJP2     | NM_004817 | 23 | 23 | 22  | 86      | 138  | 5991   | 32,21  | 83,7       |
| chr9 | 71869142  | 71869345  | TJP2     | NM_004817 | 23 | 23 | 23  | 166     | 550  | 23551  | 115,45 | 89,8       |
| chr9 | 71951063  | 71951245  | FAM189A2 | NM_004816 | 11 | 10 | 2   | 12      | 201  | 8452   | 46,19  | 100        |
| chr9 | 71986287  | 71986481  | FAM189A2 | NM_004816 | 11 | 10 | 3   | 111     | 879  | 37919  | 194,46 | 60,4       |
| chr9 | 71990549  | 71990746  | FAM189A2 | NM_004816 | 11 | 10 | 4   | 129     | 311  | 13093  | 66,13  | 73,6       |
| chr9 | 71992217  | 71992592  | FAM189A2 | NM_004816 | 11 | 10 | 5,6 | 108.134 | 2245 | 106093 | 282,16 | 100.0,49.3 |
| chr9 | 71998507  | 71998710  | FAM189A2 | NM_004816 | 11 | 10 | 7   | 130     | 849  | 36554  | 179,19 | 100        |

|       |           |           |          |              |    |    |       |            |      |       |        |                   |
|-------|-----------|-----------|----------|--------------|----|----|-------|------------|------|-------|--------|-------------------|
| chr9  | 71998777  | 71998986  | FAM189A2 | NM_004816    | 11 | 10 | 8     | 79         | 586  | 26727 | 127,27 | 100               |
| chr9  | 72000664  | 72000834  | FAM189A2 | NM_004816    | 11 | 10 | 9     | 153        | 79   | 3459  | 20,23  | 81                |
| chr9  | 72002872  | 72003377  | FAM189A2 | NM_004816    | 11 | 10 | 10    | 293        | 1167 | 54007 | 106,73 | 100               |
| chr9  | 72006591  | 72006782  | FAM189A2 | NM_004816    | 11 | 10 | 11    | 204        | 87   | 3483  | 18,14  | 63,7              |
| chr9  | 75263477  | 75263662  | TMC1     | NM_138691    | 24 | 20 | 5     | 16         | 260  | 11804 | 63,46  | 100               |
| chr9  | 75303575  | 75303790  | TMC1     | NM_138691    | 24 | 20 | 6     | 48         | 276  | 11578 | 53,6   | 100               |
| chr9  | 75309381  | 75309599  | TMC1     | NM_138691    | 24 | 20 | 7     | 172        | 32   | 1424  | 6,5    | 82                |
| chr9  | 75315363  | 75315569  | TMC1     | NM_138691    | 24 | 20 | 8     | 126        | 108  | 4887  | 23,61  | 100               |
| chr9  | 75354979  | 75355179  | TMC1     | NM_138691    | 24 | 20 | 9     | 91         | 106  | 4496  | 22,37  | 100               |
| chr9  | 75357291  | 75357506  | TMC1     | NM_138691    | 24 | 20 | 10    | 82         | 142  | 6183  | 28,63  | 100               |
| chr9  | 75366724  | 75366909  | TMC1     | NM_138691    | 24 | 20 | 11    | 107        | 83   | 3516  | 18,9   | 100               |
| chr9  | 75369605  | 75369778  | TMC1     | NM_138691    | 24 | 20 | 12    | 99         | 694  | 29932 | 172,02 | 77,8              |
| chr9  | 75387296  | 75387508  | TMC1     | NM_138691    | 24 | 20 | 13    | 143        | 257  | 10687 | 50,17  | 100               |
| chr9  | 75403193  | 75403402  | TMC1     | NM_138691    | 24 | 20 | 14    | 145        | 301  | 12700 | 60,48  | 100               |
| chr9  | 75403984  | 75404163  | TMC1     | NM_138691    | 24 | 20 | 15    | 195        | 227  | 9135  | 50,75  | 64,1              |
| chr9  | 75406714  | 75407219  | TMC1     | NM_138691    | 24 | 20 | 16,17 | 180.162    | 1970 | 91386 | 180,6  | 100.0,69.8        |
| chr9  | 75420225  | 75420440  | TMC1     | NM_138691    | 24 | 20 | 18    | 129        | 506  | 24226 | 112,16 | 100               |
| chr9  | 75430929  | 75431123  | TMC1     | NM_138691    | 24 | 20 | 19    | 68         | 317  | 14367 | 73,68  | 95,6              |
| chr9  | 75435794  | 75436086  | TMC1     | NM_138691    | 24 | 20 | 20    | 240        | 799  | 37904 | 129,37 | 85                |
| chr9  | 75441717  | 75441908  | TMC1     | NM_138691    | 24 | 20 | 21    | 126        | 704  | 29410 | 153,18 | 98,4              |
| chr9  | 75445309  | 75445607  | TMC1     | NM_138691    | 24 | 20 | 22,23 | 79,52      | 291  | 12758 | 42,67  | 100.0,100.0       |
| chr9  | 75450839  | 75451116  | TMC1     | NM_138691    | 24 | 20 | 24    | 23         | 799  | 37545 | 135,05 | 100               |
| chr9  | 117164957 | 117165160 | DFNB31   | NM_015404    | 12 | 12 | 12    | 183        | 225  | 9005  | 44,14  | 69,4              |
| chr9  | 117165394 | 117165612 | DFNB31   | NM_015404    | 12 | 12 | 11    | 123        | 250  | 10815 | 49,38  | 94,3              |
| chr9  | 117166199 | 117166396 | DFNB31   | NM_015404    | 12 | 12 | 10    | 182        | 339  | 15480 | 78,18  | 87,4              |
| chr9  | 117168654 | 117169251 | DFNB31   | NM_015404    | 12 | 12 | 9     | 538        | 309  | 13986 | 23,39  | 96,5              |
| chr9  | 117170222 | 117170416 | DFNB31   | NM_015404    | 12 | 12 | 8     | 72         | 365  | 15784 | 80,94  | 100               |
| chr9  | 117185637 | 117185828 | DFNB31   | NM_015404    | 12 | 12 | 7     | 210        | 1487 | 59423 | 309,49 | 79,5              |
| chr9  | 117186679 | 117186879 | DFNB31   | NM_015404    | 12 | 12 | 6     | 213        | 118  | 5114  | 25,44  | 69,5              |
| chr9  | 117187174 | 117187531 | DFNB31   | NM_015404    | 12 | 12 | 5     | 37         | 849  | 38617 | 107,87 | 100               |
| chr9  | 117188380 | 117188657 | DFNB31   | NM_015404    | 12 | 12 | 4     | 203        | 353  | 15856 | 57,04  | 82,3              |
| chr9  | 117228449 | 117228637 | DFNB31   | NM_015404    | 12 | 12 | 3     | 126        | 143  | 6072  | 32,13  | 72,2              |
| chr9  | 117240546 | 117240989 | DFNB31   | NM_015404    | 12 | 12 | 2     | 219        | 663  | 31300 | 70,5   | 71,7              |
| chr9  | 117266366 | 117267224 | DFNB31   | NM_015404    | 12 | 12 | 1     | 618        | 1532 | 71555 | 83,3   | 100               |
| chr9  | 140086454 | 140087155 | TPRN     | NM_001128228 | 4  | 4  | 4,3,2 | 63.107.241 | 334  | 14395 | 20,51  | 100.0,100.0,100.0 |
| chr10 | 26241018  | 26241200  | MYO3A    | NM_017433    | 35 | 33 | 3     | 168        | 84   | 3924  | 21,44  | 95,8              |
| chr10 | 26243808  | 26243987  | MYO3A    | NM_017433    | 35 | 33 | 4     | 135        | 693  | 28808 | 160,04 | 96,3              |
| chr10 | 26285379  | 26285570  | MYO3A    | NM_017433    | 35 | 33 | 5     | 105        | 195  | 8500  | 44,27  | 100               |
| chr10 | 26286073  | 26286270  | MYO3A    | NM_017433    | 35 | 33 | 6     | 100        | 199  | 8737  | 44,13  | 100               |
| chr10 | 26305799  | 26305919  | MYO3A    | NM_017433    | 35 | 33 | 7     | 77         | 365  | 12801 | 105,79 | 35,1              |
| chr10 | 26310372  | 26310658  | MYO3A    | NM_017433    | 35 | 33 | 8     | 146        | 1405 | 65480 | 228,15 | 100               |
| chr10 | 26312889  | 26313068  | MYO3A    | NM_017433    | 35 | 33 | 9     | 66         | 650  | 27510 | 152,83 | 100               |
| chr10 | 26315328  | 26315498  | MYO3A    | NM_017433    | 35 | 33 | 10    | 156        | 115  | 4879  | 28,53  | 85,9              |
| chr10 | 26355835  | 26356017  | MYO3A    | NM_017433    | 35 | 33 | 11    | 100        | 452  | 19046 | 104,08 | 100               |
| chr10 | 26357684  | 26357872  | MYO3A    | NM_017433    | 35 | 33 | 12    | 117        | 385  | 17639 | 93,33  | 100               |
| chr10 | 26359044  | 26359327  | MYO3A    | NM_017433    | 35 | 33 | 13,14 | 105,84     | 864  | 38202 | 134,51 | 96.2,96.4         |
| chr10 | 26377186  | 26377389  | MYO3A    | NM_017433    | 35 | 33 | 15    | 203        | 156  | 6977  | 34,2   | 73,4              |
| chr10 | 26385259  | 26385613  | MYO3A    | NM_017433    | 35 | 33 | 16,17 | 99.115     | 346  | 14804 | 41,7   | 100.0,100.0       |
| chr10 | 26409549  | 26409743  | MYO3A    | NM_017433    | 35 | 33 | 18    | 127        | 347  | 14333 | 73,5   | 100               |
| chr10 | 26414292  | 26414504  | MYO3A    | NM_017433    | 35 | 33 | 19    | 211        | 183  | 7759  | 36,43  | 84,4              |
| chr10 | 26417227  | 26417421  | MYO3A    | NM_017433    | 35 | 33 | 20    | 148        | 182  | 7675  | 39,36  | 68,9              |















|       |          |          |       |              |    |    |       |         |      |       |        |             |
|-------|----------|----------|-------|--------------|----|----|-------|---------|------|-------|--------|-------------|
| chr12 | 80704417 | 80704608 | OTOGL | NM_173591    | 58 | 58 | 29    | 117     | 209  | 9120  | 47,5   | 77,8        |
| chr12 | 80707236 | 80707433 | OTOGL | NM_173591    | 58 | 58 | 30    | 157     | 388  | 16044 | 81,03  | 100         |
| chr12 | 80707925 | 80708125 | OTOGL | NM_173591    | 58 | 58 | 31    | 27      | 40   | 1692  | 8,42   | 100         |
| chr12 | 80712294 | 80712500 | OTOGL | NM_173591    | 58 | 58 | 32    | 168     | 111  | 4309  | 20,82  | 100         |
| chr12 | 80714137 | 80714432 | OTOGL | NM_173591    | 58 | 58 | 33    | 279     | 1384 | 62467 | 211,04 | 82,8        |
| chr12 | 80717470 | 80717661 | OTOGL | NM_173591    | 58 | 58 | 34    | 118     | 495  | 21536 | 112,17 | 100         |
| chr12 | 80722408 | 80722599 | OTOGL | NM_173591    | 58 | 58 | 35    | 80      | 168  | 7533  | 39,23  | 100         |
| chr12 | 80722773 | 80722955 | OTOGL | NM_173591    | 58 | 58 | 36    | 69      | 516  | 22283 | 121,77 | 100         |
| chr12 | 80726730 | 80726921 | OTOGL | NM_173591    | 58 | 58 | 37    | 74      | 407  | 16609 | 86,51  | 100         |
| chr12 | 80729749 | 80729967 | OTOGL | NM_173591    | 58 | 58 | 38    | 178     | 428  | 19182 | 87,59  | 96,6        |
| chr12 | 80730223 | 80730438 | OTOGL | NM_173591    | 58 | 58 | 39    | 143     | 331  | 13913 | 64,41  | 79          |
| chr12 | 80730595 | 80730801 | OTOGL | NM_173591    | 58 | 58 | 40,41 | 24,93   | 117  | 5414  | 26,15  | 25.0,100.0  |
| chr12 | 80732858 | 80733049 | OTOGL | NM_173591    | 58 | 58 | 42    | 190     | 363  | 15537 | 80,92  | 98,4        |
| chr12 | 80735740 | 80735934 | OTOGL | NM_173591    | 58 | 58 | 43    | 215     | 113  | 4741  | 24,31  | 90,7        |
| chr12 | 80746051 | 80746245 | OTOGL | NM_173591    | 58 | 58 | 44    | 142     | 447  | 18656 | 95,67  | 100         |
| chr12 | 80747049 | 80747249 | OTOGL | NM_173591    | 58 | 58 | 45    | 186     | 307  | 14004 | 69,67  | 78          |
| chr12 | 80749581 | 80749772 | OTOGL | NM_173591    | 58 | 58 | 46    | 213     | 361  | 15661 | 81,57  | 69,5        |
| chr12 | 80750105 | 80750314 | OTOGL | NM_173591    | 58 | 58 | 47    | 105     | 349  | 14233 | 67,78  | 100         |
| chr12 | 80750555 | 80750725 | OTOGL | NM_173591    | 58 | 58 | 48    | 108     | 451  | 16774 | 98,09  | 100         |
| chr12 | 80752008 | 80752217 | OTOGL | NM_173591    | 58 | 58 | 49    | 102     | 313  | 13638 | 64,94  | 100         |
| chr12 | 80752371 | 80752645 | OTOGL | NM_173591    | 58 | 58 | 50,51 | 105,41  | 710  | 33770 | 122,8  | 100.0,14.6  |
| chr12 | 80760300 | 80760470 | OTOGL | NM_173591    | 58 | 58 | 52    | 64      | 238  | 11138 | 65,13  | 100         |
| chr12 | 80761383 | 80761577 | OTOGL | NM_173591    | 58 | 58 | 53    | 179     | 121  | 5177  | 26,55  | 76,5        |
| chr12 | 80761972 | 80762166 | OTOGL | NM_173591    | 58 | 58 | 54    | 105     | 415  | 17571 | 90,11  | 100         |
| chr12 | 80764324 | 80764494 | OTOGL | NM_173591    | 58 | 58 | 55    | 120     | 543  | 22773 | 133,18 | 100         |
| chr12 | 80765736 | 80765921 | OTOGL | NM_173591    | 58 | 58 | 56    | 46      | 241  | 11090 | 59,62  | 100         |
| chr12 | 80770899 | 80771087 | OTOGL | NM_173591    | 58 | 58 | 57    | 80      | 248  | 9383  | 49,65  | 100         |
| chr12 | 80771554 | 80771914 | OTOGL | NM_173591    | 58 | 58 | 58    | 201     | 840  | 40341 | 111,75 | 100         |
| chr12 | 80838124 | 80838315 | PTPRQ | NM_001145026 | 42 | 42 | 1     | 54      | 343  | 15942 | 83,03  | 100         |
| chr12 | 80838453 | 80838635 | PTPRQ | NM_001145026 | 42 | 42 | 2     | 109     | 364  | 16112 | 88,04  | 100         |
| chr12 | 80839214 | 80839491 | PTPRQ | NM_001145026 | 42 | 42 | 3     | 229     | 395  | 16865 | 60,67  | 96,5        |
| chr12 | 80862460 | 80862633 | PTPRQ | NM_001145026 | 42 | 42 | 4     | 131     | 289  | 12438 | 71,48  | 100         |
| chr12 | 80865862 | 80866062 | PTPRQ | NM_001145026 | 42 | 42 | 5     | 147     | 469  | 19671 | 97,87  | 100         |
| chr12 | 80878173 | 80878355 | PTPRQ | NM_001145026 | 42 | 42 | 6     | 173     | 189  | 8525  | 46,58  | 83,2        |
| chr12 | 80887043 | 80887249 | PTPRQ | NM_001145026 | 42 | 42 | 7     | 181     | 187  | 7729  | 37,34  | 100         |
| chr12 | 80888710 | 80889153 | PTPRQ | NM_001145026 | 42 | 42 | 8,9   | 162.180 | 831  | 39285 | 88,48  | 100.0,100.0 |
| chr12 | 80889855 | 80890378 | PTPRQ | NM_001145026 | 42 | 42 | 10,11 | 108.282 | 1009 | 46909 | 89,52  | 28.7,100.0  |
| chr12 | 80899781 | 80899978 | PTPRQ | NM_001145026 | 42 | 42 | 12    | 183     | 237  | 10712 | 54,1   | 96,2        |
| chr12 | 80900331 | 80900513 | PTPRQ | NM_001145026 | 42 | 42 | 13    | 102     | 227  | 9715  | 53,09  | 100         |
| chr12 | 80904058 | 80904261 | PTPRQ | NM_001145026 | 42 | 42 | 14    | 121     | 588  | 25782 | 126,38 | 100         |
| chr12 | 80927815 | 80927991 | PTPRQ | NM_001145026 | 42 | 42 | 15    | 161     | 98   | 4685  | 26,47  | 87          |
| chr12 | 80928589 | 80928789 | PTPRQ | NM_001145026 | 42 | 42 | 16    | 146     | 736  | 31343 | 155,94 | 81,5        |
| chr12 | 80933553 | 80933723 | PTPRQ | NM_001145026 | 42 | 42 | 17    | 169     | 235  | 10197 | 59,63  | 100         |
| chr12 | 80935410 | 80935675 | PTPRQ | NM_001145026 | 42 | 42 | 18    | 291     | 895  | 39037 | 146,76 | 73,9        |
| chr12 | 80935850 | 80936157 | PTPRQ | NM_001145026 | 42 | 42 | 19    | 276     | 109  | 4331  | 14,06  | 100         |
| chr12 | 80936496 | 80936669 | PTPRQ | NM_001145026 | 42 | 42 | 20    | 152     | 189  | 7694  | 44,22  | 100         |
| chr12 | 80940314 | 80940490 | PTPRQ | NM_001145026 | 42 | 42 | 21    | 142     | 402  | 16821 | 95,03  | 100         |
| chr12 | 80943202 | 80943488 | PTPRQ | NM_001145026 | 42 | 42 | 22    | 270     | 917  | 40136 | 139,85 | 90,7        |
| chr12 | 80981916 | 80982291 | PTPRQ | NM_001145026 | 42 | 42 | 23    | 324     | 963  | 44021 | 117,08 | 97,5        |
| chr12 | 80998807 | 80998998 | PTPRQ | NM_001145026 | 42 | 42 | 24    | 122     | 197  | 7554  | 39,34  | 100         |
| chr12 | 81004285 | 81004464 | PTPRQ | NM_001145026 | 42 | 42 | 25    | 187     | 378  | 15869 | 88,16  | 64,2        |

|       |           |           |         |              |    |    |     |         |       |        |        |            |
|-------|-----------|-----------|---------|--------------|----|----|-----|---------|-------|--------|--------|------------|
| chr12 | 81007367  | 81007617  | PTPRQ   | NM_001145026 | 42 | 26 | 245 | 912     | 40942 | 163,12 | 100    |            |
| chr12 | 81009926  | 81010096  | PTPRQ   | NM_001145026 | 42 | 27 | 67  | 152     | 6226  | 36,41  | 100    |            |
| chr12 | 81013135  | 81013335  | PTPRQ   | NM_001145026 | 42 | 28 | 159 | 505     | 21953 | 109,22 | 100    |            |
| chr12 | 81013921  | 81014207  | PTPRQ   | NM_001145026 | 42 | 29 | 223 | 932     | 42192 | 147,01 | 100    |            |
| chr12 | 81015782  | 81015970  | PTPRQ   | NM_001145026 | 42 | 30 | 74  | 272     | 11448 | 60,57  | 100    |            |
| chr12 | 81025953  | 81026156  | PTPRQ   | NM_001145026 | 42 | 31 | 100 | 496     | 21510 | 105,44 | 100    |            |
| chr12 | 81028654  | 81028848  | PTPRQ   | NM_001145026 | 42 | 32 | 129 | 571     | 24390 | 125,08 | 96,9   |            |
| chr12 | 81042651  | 81042863  | PTPRQ   | NM_001145026 | 42 | 33 | 27  | 175     | 7666  | 35,99  | 100    |            |
| chr12 | 81043289  | 81043492  | PTPRQ   | NM_001145026 | 42 | 34 | 82  | 597     | 26283 | 128,84 | 100    |            |
| chr12 | 81046479  | 81046670  | PTPRQ   | NM_001145026 | 42 | 35 | 91  | 453     | 19284 | 100,44 | 100    |            |
| chr12 | 81051710  | 81051895  | PTPRQ   | NM_001145026 | 42 | 36 | 77  | 74      | 2947  | 15,84  | 100    |            |
| chr12 | 81062758  | 81062940  | PTPRQ   | NM_001145026 | 42 | 37 | 135 | 326     | 14646 | 80,03  | 100    |            |
| chr12 | 81063077  | 81063271  | PTPRQ   | NM_001145026 | 42 | 38 | 126 | 310     | 13200 | 67,69  | 100    |            |
| chr12 | 81064171  | 81064341  | PTPRQ   | NM_001145026 | 42 | 39 | 149 | 397     | 16944 | 99,09  | 67,8   |            |
| chr12 | 81066936  | 81067142  | PTPRQ   | NM_001145026 | 42 | 40 | 136 | 122     | 5152  | 24,89  | 100    |            |
| chr12 | 81072378  | 81072584  | PTPRQ   | NM_001145026 | 42 | 41 | 124 | 357     | 15684 | 75,77  | 100    |            |
| chr12 | 81072708  | 81072967  | PTPRQ   | NM_001145026 | 42 | 42 | 38  | 406     | 16931 | 65,12  | 100    |            |
| chr12 | 100751116 | 100751319 | SLC17A8 | NM_139319    | 12 | 12 | 1   | 101     | 360   | 14465  | 70,91  | 100        |
| chr12 | 100774425 | 100774720 | SLC17A8 | NM_139319    | 12 | 12 | 2   | 253     | 552   | 26306  | 88,87  | 95,7       |
| chr12 | 100784707 | 100784904 | SLC17A8 | NM_139319    | 12 | 12 | 3   | 119     | 400   | 16960  | 85,66  | 100        |
| chr12 | 100787178 | 100787354 | SLC17A8 | NM_139319    | 12 | 12 | 4   | 115     | 189   | 8115   | 45,85  | 73         |
| chr12 | 100790006 | 100790233 | SLC17A8 | NM_139319    | 12 | 12 | 5   | 88      | 287   | 13193  | 57,86  | 100        |
| chr12 | 100795458 | 100795679 | SLC17A8 | NM_139319    | 12 | 12 | 6   | 87      | 730   | 31184  | 140,47 | 100        |
| chr12 | 100796055 | 100796486 | SLC17A8 | NM_139319    | 12 | 12 | 7,8 | 140.150 | 877   | 38722  | 89,63  | 100,0,75.3 |
| chr12 | 100797817 | 100798017 | SLC17A8 | NM_139319    | 12 | 12 | 9   | 133     | 245   | 10350  | 51,49  | 99,2       |
| chr12 | 100806472 | 100806687 | SLC17A8 | NM_139319    | 12 | 12 | 10  | 111     | 288   | 12322  | 57,05  | 100        |
| chr12 | 100811707 | 100811901 | SLC17A8 | NM_139319    | 12 | 12 | 11  | 128     | 879   | 38616  | 198,03 | 74,2       |
| chr12 | 100813650 | 100814001 | SLC17A8 | NM_139319    | 12 | 12 | 12  | 345     | 120   | 5104   | 14,5   | 83,5       |
| chr12 | 122692828 | 122693369 | DIABLO  | NM_019887    | 7  | 6  | 7   | 197     | 1007  | 47387  | 87,43  | 100        |
| chr12 | 122700978 | 122701412 | DIABLO  | NM_019887    | 7  | 6  | 6,5 | 97.111  | 1568  | 68896  | 158,38 | 100,0,96.4 |
| chr12 | 122702805 | 122703008 | DIABLO  | NM_019887    | 7  | 6  | 4   | 132     | 523   | 22975  | 112,62 | 100        |
| chr12 | 122709098 | 122709363 | DIABLO  | NM_019887    | 7  | 6  | 3   | 133     | 951   | 43352  | 162,98 | 70,7       |
| chr12 | 122710490 | 122710693 | DIABLO  | NM_019887    | 7  | 6  | 2   | 50      | 0     | 0      | 0      | 100        |
| chr13 | 20762994  | 20763769  | GJB2    | NM_004004    | 2  | 1  | 2   | 681     | 3104  | 147068 | 189,52 | 100        |
| chr13 | 20796696  | 20797690  | GJB6    | NM_001110219 | 5  | 1  | 5   | 786     | 2367  | 111460 | 112,02 | 100        |
| chr13 | 60240644  | 60241054  | DIAPH3  | NM_001042517 | 28 | 28 | 28  | 263     | 1087  | 52379  | 127,44 | 100        |
| chr13 | 60348260  | 60348439  | DIAPH3  | NM_001042517 | 28 | 28 | 27  | 60      | 263   | 10968  | 60,93  | 100        |
| chr13 | 60348746  | 60348937  | DIAPH3  | NM_001042517 | 28 | 28 | 26  | 96      | 504   | 21998  | 114,57 | 79,2       |
| chr13 | 60384904  | 60385074  | DIAPH3  | NM_001042517 | 28 | 28 | 25  | 136     | 210   | 8905   | 52,08  | 100        |
| chr13 | 60407249  | 60407464  | DIAPH3  | NM_001042517 | 28 | 28 | 24  | 165     | 170   | 7465   | 34,56  | 95,2       |
| chr13 | 60413413  | 60413622  | DIAPH3  | NM_001042517 | 28 | 28 | 23  | 125     | 222   | 9762   | 46,49  | 100        |
| chr13 | 60435477  | 60435733  | DIAPH3  | NM_001042517 | 28 | 28 | 22  | 130     | 424   | 18372  | 71,49  | 100        |
| chr13 | 60453345  | 60453637  | DIAPH3  | NM_001042517 | 28 | 28 | 21  | 240     | 706   | 31973  | 109,12 | 100        |
| chr13 | 60485774  | 60485959  | DIAPH3  | NM_001042517 | 28 | 28 | 20  | 102     | 471   | 21345  | 114,76 | 89,2       |
| chr13 | 60490244  | 60490423  | DIAPH3  | NM_001042517 | 28 | 28 | 19  | 95      | 430   | 17806  | 98,92  | 100        |
| chr13 | 60498916  | 60499110  | DIAPH3  | NM_001042517 | 28 | 28 | 18  | 96      | 83    | 3439   | 17,64  | 92,7       |
| chr13 | 60544097  | 60544297  | DIAPH3  | NM_001042517 | 28 | 28 | 17  | 115     | 309   | 13234  | 65,84  | 83,5       |
| chr13 | 60544986  | 60545346  | DIAPH3  | NM_001042517 | 28 | 28 | 16  | 309     | 265   | 11691  | 32,39  | 100        |
| chr13 | 60548416  | 60548595  | DIAPH3  | NM_001042517 | 28 | 28 | 15  | 105     | 473   | 20302  | 112,79 | 100        |
| chr13 | 60554815  | 60554988  | DIAPH3  | NM_001042517 | 28 | 28 | 14  | 65      | 534   | 22252  | 127,89 | 92,3       |
| chr13 | 60557798  | 60558013  | DIAPH3  | NM_001042517 | 28 | 28 | 13  | 119     | 259   | 10922  | 50,56  | 93,3       |

|       |          |          |        |                 |    |      |         |      |        |        |             |
|-------|----------|----------|--------|-----------------|----|------|---------|------|--------|--------|-------------|
| chr13 | 60565264 | 60565434 | DIAPH3 | NM_001042517 28 | 28 | 12   | 117     | 497  | 19567  | 114,43 | 100         |
| chr13 | 60566111 | 60566296 | DIAPH3 | NM_001042517 28 | 28 | 11   | 119     | 399  | 16286  | 87,56  | 79,8        |
| chr13 | 60566600 | 60566788 | DIAPH3 | NM_001042517 28 | 28 | 10   | 111     | 265  | 11782  | 62,34  | 100         |
| chr13 | 60582663 | 60582866 | DIAPH3 | NM_001042517 28 | 28 | 9    | 106     | 54   | 2260   | 11,08  | 100         |
| chr13 | 60584628 | 60584837 | DIAPH3 | NM_001042517 28 | 28 | 8    | 137     | 298  | 12838  | 61,13  | 100         |
| chr13 | 60590040 | 60590329 | DIAPH3 | NM_001042517 28 | 28 | 7,6  | 70,75   | 590  | 24177  | 83,37  | 100,0,100,0 |
| chr13 | 60616758 | 60616973 | DIAPH3 | NM_001042517 28 | 28 | 5    | 131     | 328  | 14717  | 68,13  | 100         |
| chr13 | 60667653 | 60667841 | DIAPH3 | NM_001042517 28 | 28 | 4    | 105     | 91   | 3963   | 20,97  | 76,2        |
| chr13 | 60686146 | 60686358 | DIAPH3 | NM_001042517 28 | 28 | 3    | 177     | 328  | 12873  | 60,44  | 98,9        |
| chr13 | 60706940 | 60707131 | DIAPH3 | NM_001042517 28 | 28 | 2    | 33      | 484  | 20918  | 108,95 | 100         |
| chr13 | 60737784 | 60737990 | DIAPH3 | NM_001042517 28 | 28 | 1    | 180     | 69   | 2581   | 12,47  | 65          |
| chr13 | 78472255 | 78472520 | EDNRB  | NM_000115 8     | 7  | 8    | 135     | 1132 | 52583  | 197,68 | 100         |
| chr13 | 78473947 | 78474132 | EDNRB  | NM_000115 8     | 7  | 7    | 109     | 191  | 7449   | 40,05  | 100         |
| chr13 | 78474646 | 78474858 | EDNRB  | NM_000115 8     | 7  | 6    | 134     | 273  | 10869  | 51,03  | 100         |
| chr13 | 78475200 | 78475394 | EDNRB  | NM_000115 8     | 7  | 5    | 150     | 128  | 5830   | 29,9   | 95,3        |
| chr13 | 78477251 | 78477685 | EDNRB  | NM_000115 8     | 7  | 4,3  | 205.113 | 749  | 34321  | 78,9   | 100,0,49,6  |
| chr13 | 78492144 | 78492833 | EDNRB  | NM_000115 8     | 7  | 2    | 483     | 2933 | 142372 | 206,34 | 100         |
| chr14 | 31344056 | 31344253 | COCH   | NM_001135058 11 | 11 | 1    | 34      | 75   | 3354   | 16,94  | 100         |
| chr14 | 31346683 | 31346907 | COCH   | NM_001135058 11 | 11 | 3    | 157     | 1190 | 53054  | 235,8  | 82,8        |
| chr14 | 31348049 | 31348243 | COCH   | NM_001135058 11 | 11 | 4    | 134     | 512  | 23163  | 118,78 | 76,1        |
| chr14 | 31348595 | 31348789 | COCH   | NM_001135058 11 | 11 | 5    | 63      | 561  | 23363  | 119,81 | 100         |
| chr14 | 31349643 | 31349932 | COCH   | NM_001135058 11 | 11 | 6,7  | 45.148  | 373  | 16494  | 56,88  | 100,0,94,6  |
| chr14 | 31353782 | 31353973 | COCH   | NM_001135058 11 | 11 | 8    | 104     | 356  | 15886  | 82,74  | 77,9        |
| chr14 | 31354577 | 31355488 | COCH   | NM_001135058 11 | 11 | 9,10 | 227.517 | 2363 | 113449 | 124,4  | 100,0,94,2  |
| chr14 | 31358788 | 31359062 | COCH   | NM_001135058 11 | 11 | 11   | 176     | 1013 | 47152  | 171,46 | 100         |
| chr14 | 61112896 | 61113277 | SIX1   | NM_005982 2     | 2  | 2    | 295     | 765  | 35141  | 91,99  | 93,9        |
| chr14 | 61115384 | 61115972 | SIX1   | NM_005982 2     | 2  | 1    | 560     | 202  | 9343   | 15,86  | 93,6        |
| chr14 | 76905660 | 76906094 | ESRRB  | NM_004452 11    | 8  | 4    | 397     | 277  | 12324  | 28,33  | 100         |
| chr14 | 76928890 | 76929087 | ESRRB  | NM_004452 11    | 8  | 5    | 117     | 132  | 5771   | 29,15  | 98,3        |
| chr14 | 76948283 | 76948486 | ESRRB  | NM_004452 11    | 8  | 6    | 111     | 553  | 24632  | 120,75 | 100         |
| chr14 | 76948852 | 76949046 | ESRRB  | NM_004452 11    | 8  | 7    | 162     | 326  | 14493  | 74,32  | 65,4        |
| chr14 | 76957751 | 76958034 | ESRRB  | NM_004452 11    | 8  | 8    | 270     | 62   | 2715   | 9,56   | 90,7        |
| chr14 | 76964555 | 76964844 | ESRRB  | NM_004452 11    | 8  | 9    | 239     | 109  | 3867   | 13,33  | 100         |
| chr14 | 76966149 | 76966331 | ESRRB  | NM_004452 11    | 8  | 10   | 204     | 562  | 23974  | 131,01 | 61,8        |
| chr14 | 76967057 | 76967177 | ESRRB  | NM_004452 11    | 8  | 11   | 27      | 80   | 2507   | 20,72  | 29,6        |
| chr15 | 43892773 | 43892893 | STRC   | NM_153700 29    | 29 | 26   | 149     | 219  | 7637   | 63,12  | 72,5        |
| chr15 | 43892965 | 43893085 | STRC   | NM_153700 29    | 29 | 25   | 143     | 1779 | 73964  | 611,27 | 11,2        |
| chr15 | 43893646 | 43893846 | STRC   | NM_153700 29    | 29 | 24   | 156     | 527  | 24539  | 122,08 | 66,7        |
| chr15 | 43895579 | 43895699 | STRC   | NM_153700 29    | 29 | 23   | 170     | 253  | 8994   | 74,33  | 18,2        |
| chr15 | 43896326 | 43896445 | STRC   | NM_153700 29    | 29 | 22   | 157     | 17   | 615    | 5,13   | 15,9        |
| chr15 | 43896646 | 43896766 | STRC   | NM_153700 29    | 29 | 21   | 91      | 23   | 769    | 6,36   | 4,4         |
| chr15 | 43897504 | 43897674 | STRC   | NM_153700 29    | 29 | 19   | 136     | 240  | 10018  | 58,58  | 69,1        |
| chr15 | 78397472 | 78397687 | CIB2   | NM_001271888 5  | 4  | 5    | 22      | 131  | 5582   | 25,84  | 100         |
| chr15 | 78398065 | 78398348 | CIB2   | NM_001271888 5  | 4  | 4    | 196     | 1081 | 51641  | 181,83 | 100         |
| chr15 | 78401544 | 78401747 | CIB2   | NM_001271888 5  | 4  | 3    | 148     | 1036 | 42232  | 207,02 | 100         |
| chr15 | 78403519 | 78403719 | CIB2   | NM_001271888 5  | 4  | 2    | 69      | 230  | 9673   | 48,12  | 82,6        |
| chr15 | 78423442 | 78423719 | CIB2   | NM_001271888 5  | 4  | 1    | 371     | 4    | 175    | 0,63   | 57,4        |
| chr16 | 21269984 | 21270184 | CRYM   | NM_001014444 9  | 8  | 9    | 65      | 496  | 21530  | 107,11 | 100         |
| chr16 | 21272561 | 21272779 | CRYM   | NM_001014444 9  | 8  | 8    | 85      | 340  | 14975  | 68,38  | 100         |
| chr16 | 21273384 | 21273593 | CRYM   | NM_001014444 9  | 8  | 7    | 122     | 167  | 7207   | 34,32  | 78,7        |
| chr16 | 21278932 | 21279120 | CRYM   | NM_001014444 9  | 8  | 6    | 184     | 510  | 21925  | 116,01 | 69          |

|       |          |          |        |              |    |    |          |           |      |        |        |                   |
|-------|----------|----------|--------|--------------|----|----|----------|-----------|------|--------|--------|-------------------|
| chr16 | 21281106 | 21281291 | CRYM   | NM_001014444 | 9  | 8  | 5        | 102       | 396  | 17427  | 93,69  | 100               |
| chr16 | 21286813 | 21287016 | CRYM   | NM_001014444 | 9  | 8  | 4        | 63        | 110  | 4455   | 21,84  | 100               |
| chr16 | 21288776 | 21288991 | CRYM   | NM_001014444 | 9  | 8  | 3        | 154       | 270  | 12120  | 56,11  | 84,4              |
| chr16 | 21289358 | 21289641 | CRYM   | NM_001014444 | 9  | 8  | 2        | 44        | 186  | 8254   | 29,06  | 100               |
| chr16 | 21689798 | 21690019 | OTOA   | NM_144672    | 28 | 28 | 1        | 91        | 717  | 32293  | 145,46 | 100               |
| chr16 | 21690218 | 21690557 | OTOA   | NM_144672    | 28 | 28 | 2,3,4    | 29,31,28  | 1380 | 66943  | 196,89 | 100.0,100.0,100.0 |
| chr16 | 21692936 | 21693127 | OTOA   | NM_144672    | 28 | 28 | 5        | 88        | 1286 | 56517  | 294,36 | 78,4              |
| chr16 | 21696561 | 21696767 | OTOA   | NM_144672    | 28 | 28 | 6        | 132       | 216  | 9709   | 46,9   | 92,4              |
| chr16 | 21698651 | 21698928 | OTOA   | NM_144672    | 28 | 28 | 7        | 236       | 1173 | 53173  | 191,27 | 82,6              |
| chr16 | 21702799 | 21702993 | OTOA   | NM_144672    | 28 | 28 | 8        | 104       | 282  | 10852  | 55,65  | 85,6              |
| chr16 | 21709093 | 21709314 | OTOA   | NM_144672    | 28 | 28 | 9        | 101       | 272  | 11300  | 50,9   | 100               |
| chr16 | 21712201 | 21712410 | OTOA   | NM_144672    | 28 | 28 | 10       | 140       | 365  | 16646  | 79,27  | 100               |
| chr16 | 21716416 | 21716678 | OTOA   | NM_144672    | 28 | 28 | 11       | 124       | 882  | 39252  | 149,25 | 100               |
| chr16 | 21721227 | 21721516 | OTOA   | NM_144672    | 28 | 28 | 12       | 216       | 656  | 29633  | 102,18 | 91,7              |
| chr16 | 21726364 | 21726543 | OTOA   | NM_144672    | 28 | 28 | 13       | 168       | 665  | 28804  | 160,02 | 65,5              |
| chr16 | 21728266 | 21728448 | OTOA   | NM_144672    | 28 | 28 | 14       | 141       | 148  | 5573   | 30,45  | 73                |
| chr16 | 21730325 | 21730528 | OTOA   | NM_144672    | 28 | 28 | 15       | 59        | 712  | 30540  | 149,71 | 100               |
| chr16 | 21730738 | 21730926 | OTOA   | NM_144672    | 28 | 28 | 16       | 118       | 897  | 39711  | 210,11 | 74,6              |
| chr16 | 21734099 | 21734287 | OTOA   | NM_144672    | 28 | 28 | 17       | 74        | 720  | 31665  | 167,54 | 83,8              |
| chr16 | 21737850 | 21738032 | OTOA   | NM_144672    | 28 | 28 | 18       | 136       | 154  | 6538   | 35,73  | 95,6              |
| chr16 | 21739496 | 21739690 | OTOA   | NM_144672    | 28 | 28 | 19       | 191       | 831  | 34681  | 177,85 | 67,5              |
| chr16 | 21747677 | 21747797 | OTOA   | NM_144672    | 28 | 28 | 21       | 130       | 224  | 9946   | 82,2   | 26,9              |
| chr17 | 18022025 | 18025825 | MYO15A | NM_016239    | 65 | 64 | 2        | 3609      | 6694 | 320673 | 84,37  | 100               |
| chr17 | 18027683 | 18027880 | MYO15A | NM_016239    | 65 | 64 | 3        | 83        | 199  | 8870   | 44,8   | 100               |
| chr17 | 18028362 | 18028550 | MYO15A | NM_016239    | 65 | 64 | 4        | 64        | 713  | 30556  | 161,67 | 100               |
| chr17 | 18029597 | 18029782 | MYO15A | NM_016239    | 65 | 64 | 5        | 110       | 153  | 6662   | 35,82  | 100               |
| chr17 | 18030056 | 18030229 | MYO15A | NM_016239    | 65 | 64 | 6        | 75        | 230  | 10286  | 59,11  | 100               |
| chr17 | 18030406 | 18030600 | MYO15A | NM_016239    | 65 | 64 | 7        | 95        | 353  | 15471  | 79,34  | 82,1              |
| chr17 | 18034507 | 18034763 | MYO15A | NM_016239    | 65 | 64 | 8        | 106       | 704  | 32893  | 127,99 | 100               |
| chr17 | 18035687 | 18035890 | MYO15A | NM_016239    | 65 | 64 | 10       | 114       | 588  | 23355  | 114,49 | 100               |
| chr17 | 18036579 | 18036794 | MYO15A | NM_016239    | 65 | 64 | 11       | 162       | 282  | 12477  | 57,76  | 75,3              |
| chr17 | 18038921 | 18039106 | MYO15A | NM_016239    | 65 | 64 | 12       | 114       | 199  | 8821   | 47,42  | 71,9              |
| chr17 | 18039725 | 18040002 | MYO15A | NM_016239    | 65 | 64 | 13,14    | 59.124    | 444  | 19309  | 69,46  | 100.0,100.0       |
| chr17 | 18040905 | 18041108 | MYO15A | NM_016239    | 65 | 64 | 15       | 96        | 724  | 32942  | 161,48 | 92,7              |
| chr17 | 18041433 | 18041621 | MYO15A | NM_016239    | 65 | 64 | 16       | 132       | 949  | 42909  | 227,03 | 97                |
| chr17 | 18042126 | 18042326 | MYO15A | NM_016239    | 65 | 64 | 17       | 126       | 954  | 44500  | 221,39 | 99,2              |
| chr17 | 18042588 | 18042880 | MYO15A | NM_016239    | 65 | 64 | 18       | 78        | 226  | 9547   | 32,58  | 42,3              |
| chr17 | 18043854 | 18044202 | MYO15A | NM_016239    | 65 | 64 | 19,20    | 149,46    | 775  | 34780  | 99,66  | 84.6,100.0        |
| chr17 | 18044261 | 18044464 | MYO15A | NM_016239    | 65 | 64 | 21       | 125       | 232  | 9258   | 45,38  | 100               |
| chr17 | 18044946 | 18045158 | MYO15A | NM_016239    | 65 | 64 | 22       | 118       | 695  | 28907  | 135,71 | 100               |
| chr17 | 18045335 | 18045508 | MYO15A | NM_016239    | 65 | 64 | 23       | 176       | 202  | 8315   | 47,79  | 65,9              |
| chr17 | 18046077 | 18046265 | MYO15A | NM_016239    | 65 | 64 | 24       | 85        | 126  | 5484   | 29,02  | 91,8              |
| chr17 | 18046936 | 18047385 | MYO15A | NM_016239    | 65 | 64 | 26,27    | 82.131    | 342  | 15199  | 33,78  | 100.0,100.0       |
| chr17 | 18047716 | 18047919 | MYO15A | NM_016239    | 65 | 64 | 28       | 96        | 333  | 14576  | 71,45  | 100               |
| chr17 | 18049133 | 18049428 | MYO15A | NM_016239    | 65 | 64 | 29       | 236       | 484  | 20527  | 69,35  | 100               |
| chr17 | 18051279 | 18051458 | MYO15A | NM_016239    | 65 | 64 | 30       | 182       | 260  | 10945  | 60,81  | 63,7              |
| chr17 | 18051814 | 18052222 | MYO15A | NM_016239    | 65 | 64 | 31,32    | 73.192    | 1292 | 61787  | 151,07 | 94.5,77.1         |
| chr17 | 18052501 | 18052867 | MYO15A | NM_016239    | 65 | 64 | 33,34    | 161,95    | 572  | 24487  | 66,72  | 100.0,71.6        |
| chr17 | 18053664 | 18054172 | MYO15A | NM_016239    | 65 | 64 | 35,36,37 | 115,68,78 | 365  | 16952  | 33,3   | 100.0,100.0,29.5  |
| chr17 | 18054403 | 18054852 | MYO15A | NM_016239    | 65 | 64 | 38,39    | 181.133   | 953  | 45708  | 101,57 | 100.0,100.0       |
| chr17 | 18055082 | 18055439 | MYO15A | NM_016239    | 65 | 64 | 40,41    | 106,73    | 966  | 41913  | 117,08 | 100.0,19.2        |

|       |          |          |        |           |    |    |       |         |      |        |        |             |
|-------|----------|----------|--------|-----------|----|----|-------|---------|------|--------|--------|-------------|
| chr17 | 18057007 | 18057222 | MYO15A | NM_016239 | 65 | 64 | 42    | 122     | 57   | 2459   | 11,38  | 100         |
| chr17 | 18057446 | 18057649 | MYO15A | NM_016239 | 65 | 64 | 43    | 60      | 297  | 13010  | 63,77  | 98,3        |
| chr17 | 18057955 | 18058149 | MYO15A | NM_016239 | 65 | 64 | 44    | 76      | 257  | 11664  | 59,82  | 100         |
| chr17 | 18058353 | 18058698 | MYO15A | NM_016239 | 65 | 64 | 45,46 | 116.119 | 625  | 28630  | 82,75  | 100,0,59.7  |
| chr17 | 18059545 | 18059745 | MYO15A | NM_016239 | 65 | 64 | 47    | 142     | 203  | 8222   | 40,91  | 74,6        |
| chr17 | 18060270 | 18060642 | MYO15A | NM_016239 | 65 | 64 | 48,49 | 112,75  | 392  | 17078  | 45,79  | 98.2,100.0  |
| chr17 | 18060949 | 18061152 | MYO15A | NM_016239 | 65 | 64 | 50    | 179     | 438  | 18523  | 90,8   | 65,4        |
| chr17 | 18061827 | 18062021 | MYO15A | NM_016239 | 65 | 64 | 51    | 116     | 583  | 25075  | 128,59 | 100         |
| chr17 | 18062240 | 18062422 | MYO15A | NM_016239 | 65 | 64 | 52    | 73      | 367  | 15024  | 82,1   | 98,6        |
| chr17 | 18062639 | 18062830 | MYO15A | NM_016239 | 65 | 64 | 53    | 73      | 893  | 36559  | 190,41 | 31,5        |
| chr17 | 18062891 | 18063396 | MYO15A | NM_016239 | 65 | 64 | 54,55 | 74,83   | 1730 | 80537  | 159,16 | 100,0,100.0 |
| chr17 | 18064447 | 18064736 | MYO15A | NM_016239 | 65 | 64 | 56    | 131     | 352  | 15869  | 54,72  | 80,9        |
| chr17 | 18065776 | 18065997 | MYO15A | NM_016239 | 65 | 64 | 57    | 95      | 383  | 15341  | 69,1   | 100         |
| chr17 | 18066511 | 18066690 | MYO15A | NM_016239 | 65 | 64 | 58    | 78      | 902  | 39249  | 218,05 | 100         |
| chr17 | 18067057 | 18067236 | MYO15A | NM_016239 | 65 | 64 | 59    | 97      | 177  | 7456   | 41,42  | 99          |
| chr17 | 18069705 | 18069902 | MYO15A | NM_016239 | 65 | 64 | 60    | 161     | 497  | 20910  | 105,61 | 81,4        |
| chr17 | 18070810 | 18071025 | MYO15A | NM_016239 | 65 | 64 | 61    | 134     | 171  | 7493   | 34,69  | 91          |
| chr17 | 18074852 | 18075046 | MYO15A | NM_016239 | 65 | 64 | 62    | 134     | 226  | 9654   | 49,51  | 70,9        |
| chr17 | 18075489 | 18075784 | MYO15A | NM_016239 | 65 | 64 | 63    | 134     | 975  | 42338  | 143,03 | 86,6        |
| chr17 | 18077007 | 18077198 | MYO15A | NM_016239 | 65 | 64 | 64    | 141     | 185  | 8476   | 44,15  | 73,8        |
| chr17 | 18082063 | 18082269 | MYO15A | NM_016239 | 65 | 64 | 65    | 102     | 300  | 12800  | 61,84  | 100         |
| chr17 | 72914114 | 72914287 | USH1G  | NM_173477 | 3  | 3  | 3     | 4       | 524  | 22356  | 128,48 | 100         |
| chr17 | 72915612 | 72916825 | USH1G  | NM_173477 | 3  | 3  | 2     | 1218    | 1165 | 54704  | 45,06  | 94,8        |
| chr17 | 72918929 | 72919132 | USH1G  | NM_173477 | 3  | 3  | 1     | 164     | 52   | 2298   | 11,26  | 78          |
| chr17 | 79477820 | 79477940 | ACTG1  | NM_001614 | 6  | 5  | 6     | 144     | 30   | 916    | 7,57   | 27,8        |
| chr17 | 79478128 | 79478248 | ACTG1  | NM_001614 | 6  | 5  | 5,4   | 182.439 | 188  | 6777   | 56,01  | 3,8,8.0     |
| chr17 | 79478635 | 79478755 | ACTG1  | NM_001614 | 6  | 5  | 4     | 439     | 275  | 8605   | 71,12  | 4,1         |
| chr17 | 79479142 | 79479443 | ACTG1  | NM_001614 | 6  | 5  | 3,2   | 240.123 | 453  | 20770  | 68,77  | 11.2,100.0  |
| chr18 | 44057036 | 44057876 | LOXHD1 | NM_144612 | 40 | 40 | 40    | 481     | 1946 | 89964  | 106,97 | 91,9        |
| chr18 | 44063573 | 44063767 | LOXHD1 | NM_144612 | 40 | 40 | 39    | 159     | 386  | 16466  | 84,44  | 85,5        |
| chr18 | 44064917 | 44065120 | LOXHD1 | NM_144612 | 40 | 40 | 38    | 133     | 722  | 32586  | 159,74 | 100         |
| chr18 | 44068994 | 44069179 | LOXHD1 | NM_144612 | 40 | 40 | 37    | 171     | 833  | 34847  | 187,35 | 65,5        |
| chr18 | 44085784 | 44085978 | LOXHD1 | NM_144612 | 40 | 40 | 36    | 186     | 1167 | 51270  | 262,92 | 95,7        |
| chr18 | 44087502 | 44087675 | LOXHD1 | NM_144612 | 40 | 40 | 35    | 175     | 654  | 28552  | 164,09 | 99,4        |
| chr18 | 44089453 | 44089748 | LOXHD1 | NM_144612 | 40 | 40 | 34    | 118     | 448  | 19352  | 65,38  | 74,6        |
| chr18 | 44098115 | 44098324 | LOXHD1 | NM_144612 | 40 | 40 | 33    | 128     | 802  | 35075  | 167,02 | 82          |
| chr18 | 44102064 | 44102282 | LOXHD1 | NM_144612 | 40 | 40 | 32    | 209     | 564  | 24731  | 112,93 | 100         |
| chr18 | 44104404 | 44104850 | LOXHD1 | NM_144612 | 40 | 40 | 31,30 | 136.210 | 1113 | 51712  | 115,69 | 100,0,85.7  |
| chr18 | 44109176 | 44109376 | LOXHD1 | NM_144612 | 40 | 40 | 29    | 155     | 417  | 18412  | 91,6   | 76,8        |
| chr18 | 44113120 | 44113290 | LOXHD1 | NM_144612 | 40 | 40 | 28    | 163     | 114  | 5042   | 29,49  | 100         |
| chr18 | 44114330 | 44114500 | LOXHD1 | NM_144612 | 40 | 40 | 27    | 117     | 500  | 21700  | 126,9  | 72,6        |
| chr18 | 44118151 | 44118339 | LOXHD1 | NM_144612 | 40 | 40 | 26    | 182     | 490  | 20994  | 111,08 | 82,4        |
| chr18 | 44121768 | 44121989 | LOXHD1 | NM_144612 | 40 | 40 | 25    | 165     | 525  | 23424  | 105,51 | 82,4        |
| chr18 | 44122713 | 44122922 | LOXHD1 | NM_144612 | 40 | 40 | 24    | 129     | 761  | 32302  | 153,82 | 82,2        |
| chr18 | 44125297 | 44125482 | LOXHD1 | NM_144612 | 40 | 40 | 23    | 105     | 423  | 17733  | 95,34  | 83,8        |
| chr18 | 44126830 | 44127051 | LOXHD1 | NM_144612 | 40 | 40 | 22    | 164     | 269  | 10879  | 49     | 100         |
| chr18 | 44137234 | 44137434 | LOXHD1 | NM_144612 | 40 | 40 | 21    | 134     | 812  | 35408  | 176,16 | 86,6        |
| chr18 | 44139393 | 44139590 | LOXHD1 | NM_144612 | 40 | 40 | 20    | 155     | 693  | 30296  | 153,01 | 100         |
| chr18 | 44140031 | 44140536 | LOXHD1 | NM_144612 | 40 | 40 | 19    | 463     | 2974 | 136532 | 269,83 | 100         |
| chr18 | 44143052 | 44143270 | LOXHD1 | NM_144612 | 40 | 40 | 18    | 161     | 555  | 23367  | 106,7  | 85,1        |
| chr18 | 44146278 | 44146490 | LOXHD1 | NM_144612 | 40 | 40 | 17    | 193     | 441  | 17440  | 81,88  | 69,9        |

|       |          |          |          |              |    |    |     |         |      |        |        |             |
|-------|----------|----------|----------|--------------|----|----|-----|---------|------|--------|--------|-------------|
| chr18 | 44149396 | 44149599 | LOXHD1   | NM_144612    | 40 | 40 | 16  | 197     | 600  | 26141  | 128,14 | 99          |
| chr18 | 44152037 | 44152252 | LOXHD1   | NM_144612    | 40 | 40 | 15  | 77      | 725  | 31449  | 145,6  | 100         |
| chr18 | 44157715 | 44157918 | LOXHD1   | NM_144612    | 40 | 40 | 14  | 161     | 520  | 22275  | 109,19 | 72          |
| chr18 | 44159506 | 44159697 | LOXHD1   | NM_144612    | 40 | 40 | 13  | 155     | 1616 | 65301  | 340,11 | 67,7        |
| chr18 | 44171923 | 44172114 | LOXHD1   | NM_144612    | 40 | 40 | 12  | 136     | 497  | 21113  | 109,96 | 80,1        |
| chr18 | 44172445 | 44172621 | LOXHD1   | NM_144612    | 40 | 40 | 11  | 87      | 326  | 14224  | 80,36  | 100         |
| chr18 | 44173566 | 44173784 | LOXHD1   | NM_144612    | 40 | 40 | 10  | 161     | 196  | 8083   | 36,91  | 98,1        |
| chr18 | 44174210 | 44174401 | LOXHD1   | NM_144612    | 40 | 40 | 9   | 136     | 912  | 36139  | 188,22 | 79,4        |
| chr18 | 44181257 | 44181614 | LOXHD1   | NM_144612    | 40 | 40 | 8   | 251     | 2708 | 114622 | 320,17 | 69,3        |
| chr18 | 44184087 | 44184293 | LOXHD1   | NM_144612    | 40 | 40 | 7   | 124     | 402  | 18187  | 87,86  | 85,5        |
| chr18 | 44190769 | 44190972 | LOXHD1   | NM_144612    | 40 | 40 | 6   | 149     | 820  | 34762  | 170,4  | 79,9        |
| chr18 | 44198109 | 44198291 | LOXHD1   | NM_144612    | 40 | 40 | 5   | 99      | 677  | 28811  | 157,44 | 100         |
| chr18 | 44219642 | 44219845 | LOXHD1   | NM_144612    | 40 | 40 | 4   | 185     | 315  | 13901  | 68,14  | 65,9        |
| chr18 | 44221813 | 44222031 | LOXHD1   | NM_144612    | 40 | 40 | 3   | 81      | 504  | 22546  | 102,95 | 100         |
| chr18 | 44229059 | 44229277 | LOXHD1   | NM_144612    | 40 | 40 | 2   | 115     | 290  | 12581  | 57,45  | 100         |
| chr18 | 44236864 | 44237055 | LOXHD1   | NM_144612    | 40 | 40 | 1   | 130     | 378  | 16353  | 85,17  | 100         |
| chr19 | 3585603  | 3585883  | GIPC3    | NM_133261    | 6  | 6  | 1   | 225     | 19   | 851    | 3,03   | 96,9        |
| chr19 | 3586434  | 3586930  | GIPC3    | NM_133261    | 6  | 6  | 2,3 | 186.181 | 806  | 37119  | 74,69  | 100.0,65.7  |
| chr19 | 3589330  | 3589524  | GIPC3    | NM_133261    | 6  | 6  | 4   | 113     | 348  | 15285  | 78,38  | 74,3        |
| chr19 | 3589780  | 3590306  | GIPC3    | NM_133261    | 6  | 6  | 5,6 | 82.152  | 345  | 16101  | 30,55  | 100.0,100.0 |
| chr19 | 45202399 | 45202673 | CEACAM16 | NM_001039213 | 7  | 6  | 1   | 110     | 283  | 12551  | 45,64  | 100         |
| chr19 | 45204584 | 45204775 | CEACAM16 | NM_001039213 | 7  | 6  | 2   | 37      | 372  | 15738  | 81,97  | 100         |
| chr19 | 45206541 | 45206916 | CEACAM16 | NM_001039213 | 7  | 6  | 3   | 345     | 701  | 30887  | 82,15  | 86,4        |
| chr19 | 45207331 | 45207617 | CEACAM16 | NM_001039213 | 7  | 6  | 4   | 279     | 78   | 3048   | 10,62  | 84,6        |
| chr19 | 45208918 | 45209189 | CEACAM16 | NM_001039213 | 7  | 6  | 5   | 279     | 759  | 32870  | 120,85 | 79,2        |
| chr19 | 45211184 | 45211541 | CEACAM16 | NM_001039213 | 7  | 6  | 6   | 327     | 136  | 5784   | 16,16  | 84,4        |
| chr19 | 46268700 | 46269303 | SIX5     | NM_175875    | 3  | 3  | 3   | 611     | 246  | 11048  | 18,29  | 89,2        |
| chr19 | 46269653 | 46270484 | SIX5     | NM_175875    | 3  | 3  | 2   | 806     | 102  | 4671   | 5,61   | 94,4        |
| chr19 | 46271340 | 46272195 | SIX5     | NM_175875    | 3  | 3  | 1   | 803     | 48   | 2043   | 2,39   | 95          |
| chr19 | 50713595 | 50714035 | MYH14    | NM_001145809 | 43 | 42 | 2   | 405     | 105  | 4385   | 9,94   | 100         |
| chr19 | 50720831 | 50721004 | MYH14    | NM_001145809 | 43 | 42 | 3   | 157     | 664  | 28233  | 162,26 | 84,7        |
| chr19 | 50726293 | 50726582 | MYH14    | NM_001145809 | 43 | 42 | 4,5 | 28.103  | 1005 | 46577  | 160,61 | 100.0,76.7  |
| chr19 | 50727322 | 50727516 | MYH14    | NM_001145809 | 43 | 42 | 6   | 24      | 317  | 14113  | 72,37  | 100         |
| chr19 | 50728802 | 50729026 | MYH14    | NM_001145809 | 43 | 42 | 7   | 93      | 200  | 9311   | 41,38  | 100         |
| chr19 | 50730085 | 50730294 | MYH14    | NM_001145809 | 43 | 42 | 8   | 64      | 528  | 22286  | 106,12 | 100         |
| chr19 | 50733730 | 50733936 | MYH14    | NM_001145809 | 43 | 42 | 9   | 99      | 83   | 3769   | 18,21  | 100         |
| chr19 | 50735213 | 50735425 | MYH14    | NM_001145809 | 43 | 42 | 10  | 141     | 300  | 12636  | 59,32  | 81,6        |
| chr19 | 50747371 | 50747589 | MYH14    | NM_001145809 | 43 | 42 | 11  | 96      | 296  | 12702  | 58     | 94,8        |
| chr19 | 50750264 | 50750485 | MYH14    | NM_001145809 | 43 | 42 | 12  | 119     | 232  | 9850   | 44,37  | 97,5        |
| chr19 | 50752288 | 50752479 | MYH14    | NM_001145809 | 43 | 42 | 13  | 153     | 233  | 9634   | 50,18  | 71,2        |
| chr19 | 50752968 | 50753156 | MYH14    | NM_001145809 | 43 | 42 | 14  | 174     | 206  | 9100   | 48,15  | 64,9        |
| chr19 | 50753686 | 50753889 | MYH14    | NM_001145809 | 43 | 42 | 15  | 174     | 219  | 9689   | 47,5   | 67,8        |
| chr19 | 50755831 | 50756007 | MYH14    | NM_001145809 | 43 | 42 | 16  | 115     | 349  | 15389  | 86,94  | 97,4        |
| chr19 | 50758350 | 50758565 | MYH14    | NM_001145809 | 43 | 42 | 17  | 99      | 1167 | 50989  | 236,06 | 89,9        |
| chr19 | 50760621 | 50760797 | MYH14    | NM_001145809 | 43 | 42 | 18  | 188     | 169  | 6991   | 39,5   | 65,4        |
| chr19 | 50762289 | 50762513 | MYH14    | NM_001145809 | 43 | 42 | 19  | 122     | 51   | 2148   | 9,55   | 92,6        |
| chr19 | 50763762 | 50763977 | MYH14    | NM_001145809 | 43 | 42 | 20  | 70      | 695  | 30213  | 139,88 | 100         |
| chr19 | 50764666 | 50764860 | MYH14    | NM_001145809 | 43 | 42 | 21  | 161     | 97   | 4377   | 22,45  | 80,1        |
| chr19 | 50766447 | 50766674 | MYH14    | NM_001145809 | 43 | 42 | 22  | 109     | 243  | 10825  | 47,48  | 97,2        |
| chr19 | 50770027 | 50770227 | MYH14    | NM_001145809 | 43 | 42 | 23  | 132     | 83   | 3805   | 18,93  | 71,2        |
| chr19 | 50771495 | 50771695 | MYH14    | NM_001145809 | 43 | 42 | 24  | 207     | 442  | 17259  | 85,87  | 62,8        |

|       |          |          |         |              |    |    |       |         |      |       |        |            |
|-------|----------|----------|---------|--------------|----|----|-------|---------|------|-------|--------|------------|
| chr19 | 50774676 | 50774861 | MYH14   | NM_001145809 | 43 | 42 | 25    | 138     | 92   | 4038  | 21,71  | 92,8       |
| chr19 | 50775103 | 50775288 | MYH14   | NM_001145809 | 43 | 42 | 26    | 124     | 202  | 8919  | 47,95  | 100        |
| chr19 | 50775726 | 50775941 | MYH14   | NM_001145809 | 43 | 42 | 27    | 172     | 21   | 969   | 4,49   | 72,7       |
| chr19 | 50779187 | 50779396 | MYH14   | NM_001145809 | 43 | 42 | 28    | 213     | 150  | 6252  | 29,77  | 70         |
| chr19 | 50779910 | 50780110 | MYH14   | NM_001145809 | 43 | 42 | 29    | 145     | 174  | 7994  | 39,77  | 66,9       |
| chr19 | 50781267 | 50781470 | MYH14   | NM_001145809 | 43 | 42 | 30    | 207     | 162  | 6924  | 33,94  | 63,3       |
| chr19 | 50783238 | 50783580 | MYH14   | NM_001145809 | 43 | 42 | 31,32 | 105,153 | 394  | 18463 | 53,83  | 100,0,60,8 |
| chr19 | 50784891 | 50785177 | MYH14   | NM_001145809 | 43 | 42 | 33    | 249     | 174  | 7315  | 25,49  | 83,9       |
| chr19 | 50789669 | 50789881 | MYH14   | NM_001145809 | 43 | 42 | 34    | 213     | 149  | 6203  | 29,12  | 67,1       |
| chr19 | 50792623 | 50792844 | MYH14   | NM_001145809 | 43 | 42 | 35    | 213     | 304  | 13296 | 59,89  | 71,4       |
| chr19 | 50794190 | 50794384 | MYH14   | NM_001145809 | 43 | 42 | 36    | 162     | 199  | 8472  | 43,45  | 71,6       |
| chr19 | 50795415 | 50795612 | MYH14   | NM_001145809 | 43 | 42 | 37    | 129     | 188  | 7843  | 39,61  | 73,6       |
| chr19 | 50796505 | 50796681 | MYH14   | NM_001145809 | 43 | 42 | 38    | 89      | 89   | 3877  | 21,9   | 83,1       |
| chr19 | 50796839 | 50797057 | MYH14   | NM_001145809 | 43 | 42 | 39    | 124     | 231  | 9087  | 41,49  | 85,5       |
| chr19 | 50804993 | 50805181 | MYH14   | NM_001145809 | 43 | 42 | 40    | 209     | 77   | 2687  | 14,22  | 64,1       |
| chr19 | 50810187 | 50810384 | MYH14   | NM_001145809 | 43 | 42 | 41    | 109     | 194  | 8369  | 42,27  | 72,5       |
| chr19 | 50812319 | 50812492 | MYH14   | NM_001145809 | 43 | 42 | 42    | 173     | 238  | 9905  | 56,93  | 67,1       |
| chr19 | 50812937 | 50813232 | MYH14   | NM_001145809 | 43 | 42 | 43    | 151     | 231  | 10798 | 36,48  | 73,5       |
| chr20 | 57875686 | 57875975 | EDN3    | NM_207032    | 5  | 5  | 1     | 52      | 6    | 259   | 0,89   | 100        |
| chr20 | 57876365 | 57876740 | EDN3    | NM_207032    | 5  | 5  | 2     | 313     | 113  | 4926  | 13,1   | 88,2       |
| chr20 | 57896134 | 57896304 | EDN3    | NM_207032    | 5  | 5  | 3     | 177     | 531  | 22594 | 132,13 | 65         |
| chr20 | 57897342 | 57897521 | EDN3    | NM_207032    | 5  | 5  | 4     | 81      | 101  | 4520  | 25,11  | 100        |
| chr20 | 57899401 | 57899613 | EDN3    | NM_207032    | 5  | 5  | 5     | 37      | 389  | 16697 | 78,39  | 59,5       |
| chr21 | 35821432 | 35822059 | KCNE1   | NM_000219    | 4  | 1  | 4     | 390     | 1450 | 66552 | 105,97 | 100        |
| chr21 | 37833164 | 37834016 | CLDN14  | NM_001146077 | 3  | 1  | 3     | 720     | 782  | 36738 | 43,07  | 100        |
| chr21 | 43792737 | 43792946 | TMPRSS3 | NM_024022    | 13 | 12 | 13    | 18      | 778  | 34329 | 163,47 | 100        |
| chr21 | 43795737 | 43795949 | TMPRSS3 | NM_024022    | 13 | 12 | 12    | 153     | 592  | 24959 | 117,18 | 81,7       |
| chr21 | 43796688 | 43796867 | TMPRSS3 | NM_024022    | 13 | 12 | 11    | 146     | 149  | 6365  | 35,36  | 74         |
| chr21 | 43800245 | 43800433 | TMPRSS3 | NM_024022    | 13 | 12 | 10    | 96      | 335  | 15037 | 79,56  | 80,2       |
| chr21 | 43802004 | 43802456 | TMPRSS3 | NM_024022    | 13 | 12 | 9     | 170     | 966  | 46484 | 102,61 | 100        |
| chr21 | 43803055 | 43803264 | TMPRSS3 | NM_024022    | 13 | 12 | 8     | 166     | 302  | 12156 | 57,89  | 74,1       |
| chr21 | 43804069 | 43804248 | TMPRSS3 | NM_024022    | 13 | 12 | 7     | 44      | 411  | 18434 | 102,41 | 100        |
| chr21 | 43805537 | 43805740 | TMPRSS3 | NM_024022    | 13 | 12 | 6     | 126     | 784  | 34232 | 167,8  | 84,9       |
| chr21 | 43808401 | 43808604 | TMPRSS3 | NM_024022    | 13 | 12 | 5     | 124     | 607  | 26500 | 129,9  | 75         |
| chr21 | 43809025 | 43809219 | TMPRSS3 | NM_024022    | 13 | 12 | 4     | 117     | 1248 | 47903 | 245,66 | 100        |
| chr21 | 43809993 | 43810175 | TMPRSS3 | NM_024022    | 13 | 12 | 3     | 111     | 147  | 6047  | 33,04  | 100        |
| chr21 | 43815369 | 43815631 | TMPRSS3 | NM_024022    | 13 | 12 | 2     | 94      | 1733 | 76409 | 290,53 | 100        |
| chr21 | 43815991 | 43816185 | TMPRSS3 | NM_024022    | 13 | 12 | 1     | 150     | 409  | 17352 | 88,98  | 90         |
| chr21 | 45919561 | 45919835 | TSPEAR  | NM_144991    | 12 | 12 | 12    | 154     | 39   | 1672  | 6,08   | 100        |
| chr21 | 45924658 | 45924861 | TSPEAR  | NM_144991    | 12 | 12 | 11    | 102     | 425  | 19299 | 94,6   | 100        |
| chr21 | 45929087 | 45929272 | TSPEAR  | NM_144991    | 12 | 12 | 10    | 188     | 1162 | 48857 | 262,67 | 97,3       |
| chr21 | 45941773 | 45942038 | TSPEAR  | NM_144991    | 12 | 12 | 9     | 230     | 360  | 16845 | 63,33  | 97         |
| chr21 | 45945554 | 45945807 | TSPEAR  | NM_144991    | 12 | 12 | 8     | 187     | 723  | 32336 | 127,31 | 90,4       |
| chr21 | 45947144 | 45947436 | TSPEAR  | NM_144991    | 12 | 12 | 7     | 227     | 944  | 43401 | 148,13 | 100        |
| chr21 | 45948357 | 45948563 | TSPEAR  | NM_144991    | 12 | 12 | 6     | 132     | 165  | 6894  | 33,3   | 83,3       |
| chr21 | 45949597 | 45949791 | TSPEAR  | NM_144991    | 12 | 12 | 5     | 157     | 749  | 33691 | 172,77 | 70,7       |
| chr21 | 45950929 | 45951126 | TSPEAR  | NM_144991    | 12 | 12 | 4     | 91      | 700  | 29636 | 149,68 | 96,7       |
| chr21 | 45953558 | 45953829 | TSPEAR  | NM_144991    | 12 | 12 | 3     | 239     | 78   | 3381  | 12,43  | 100        |
| chr21 | 45987593 | 45987861 | TSPEAR  | NM_144991    | 12 | 12 | 2     | 221     | 443  | 20113 | 74,77  | 87,3       |
| chr21 | 46131251 | 46131457 | TSPEAR  | NM_144991    | 12 | 12 | 1     | 82      | 302  | 12075 | 58,33  | 100        |
| chr22 | 36678651 | 36678928 | MYH9    | NM_002473    | 41 | 40 | 41    | 118     | 78   | 3330  | 11,98  | 100        |

|       |          |          |        |              |    |    |       |         |      |        |        |             |
|-------|----------|----------|--------|--------------|----|----|-------|---------|------|--------|--------|-------------|
| chr22 | 36680187 | 36680627 | MYH9   | NM_002473    | 41 | 40 | 40,39 | 173.109 | 641  | 30406  | 68,95  | 72.3,100.0  |
| chr22 | 36681170 | 36681385 | MYH9   | NM_002473    | 41 | 40 | 38    | 209     | 342  | 13103  | 60,66  | 98,6        |
| chr22 | 36681746 | 36682091 | MYH9   | NM_002473    | 41 | 40 | 37,36 | 124,89  | 196  | 8960   | 25,9   | 66.1,100.0  |
| chr22 | 36682694 | 36682888 | MYH9   | NM_002473    | 41 | 40 | 35    | 129     | 292  | 12756  | 65,42  | 96,9        |
| chr22 | 36684293 | 36684484 | MYH9   | NM_002473    | 41 | 40 | 34    | 162     | 272  | 11866  | 61,8   | 100         |
| chr22 | 36684751 | 36685369 | MYH9   | NM_002473    | 41 | 40 | 33,32 | 213.213 | 1678 | 78298  | 126,49 | 100.0,100.0 |
| chr22 | 36688036 | 36688316 | MYH9   | NM_002473    | 41 | 40 | 31    | 249     | 464  | 20802  | 74,03  | 98,4        |
| chr22 | 36689380 | 36689571 | MYH9   | NM_002473    | 41 | 40 | 30    | 153     | 417  | 17420  | 90,73  | 96,7        |
| chr22 | 36689690 | 36689899 | MYH9   | NM_002473    | 41 | 40 | 29    | 105     | 380  | 17149  | 81,66  | 90,5        |
| chr22 | 36690215 | 36690415 | MYH9   | NM_002473    | 41 | 40 | 28    | 207     | 510  | 21431  | 106,62 | 62,8        |
| chr22 | 36691018 | 36691206 | MYH9   | NM_002473    | 41 | 40 | 27    | 145     | 157  | 6378   | 33,75  | 72,4        |
| chr22 | 36691586 | 36691801 | MYH9   | NM_002473    | 41 | 40 | 26    | 213     | 764  | 31958  | 147,95 | 83,6        |
| chr22 | 36692925 | 36693149 | MYH9   | NM_002473    | 41 | 40 | 25    | 172     | 320  | 13004  | 57,8   | 79,1        |
| chr22 | 36694965 | 36695141 | MYH9   | NM_002473    | 41 | 40 | 24    | 124     | 363  | 16429  | 92,82  | 100         |
| chr22 | 36696186 | 36696413 | MYH9   | NM_002473    | 41 | 40 | 23    | 138     | 149  | 5428   | 23,81  | 90,6        |
| chr22 | 36696971 | 36697165 | MYH9   | NM_002473    | 41 | 40 | 22    | 207     | 505  | 21341  | 109,44 | 64,3        |
| chr22 | 36697470 | 36697676 | MYH9   | NM_002473    | 41 | 40 | 21    | 132     | 346  | 14711  | 71,07  | 73,5        |
| chr22 | 36698633 | 36698824 | MYH9   | NM_002473    | 41 | 40 | 20    | 109     | 204  | 8171   | 42,56  | 82,6        |
| chr22 | 36700062 | 36700262 | MYH9   | NM_002473    | 41 | 40 | 19    | 161     | 185  | 8039   | 40     | 87          |
| chr22 | 36701070 | 36701288 | MYH9   | NM_002473    | 41 | 40 | 18    | 70      | 484  | 21248  | 97,02  | 100         |
| chr22 | 36702011 | 36702196 | MYH9   | NM_002473    | 41 | 40 | 17    | 122     | 465  | 18505  | 99,49  | 71,3        |
| chr22 | 36702471 | 36702662 | MYH9   | NM_002473    | 41 | 40 | 16    | 194     | 179  | 7447   | 38,79  | 94,3        |
| chr22 | 36705316 | 36705504 | MYH9   | NM_002473    | 41 | 40 | 15    | 115     | 933  | 40832  | 216,04 | 100         |
| chr22 | 36708140 | 36708355 | MYH9   | NM_002473    | 41 | 40 | 14    | 174     | 212  | 8131   | 37,64  | 73,6        |
| chr22 | 36710316 | 36710436 | MYH9   | NM_002473    | 41 | 40 | 13    | 174     | 198  | 7332   | 60,6   | 27,6        |
| chr22 | 36712474 | 36712677 | MYH9   | NM_002473    | 41 | 40 | 12    | 153     | 355  | 16550  | 81,13  | 75,8        |
| chr22 | 36714285 | 36714458 | MYH9   | NM_002473    | 41 | 40 | 11    | 119     | 138  | 5354   | 30,77  | 72,3        |
| chr22 | 36715457 | 36715672 | MYH9   | NM_002473    | 41 | 40 | 10    | 96      | 870  | 39274  | 181,82 | 91,7        |
| chr22 | 36716212 | 36716397 | MYH9   | NM_002473    | 41 | 40 | 9     | 144     | 539  | 22101  | 118,82 | 92,4        |
| chr22 | 36716746 | 36716955 | MYH9   | NM_002473    | 41 | 40 | 8     | 99      | 529  | 23461  | 111,72 | 100         |
| chr22 | 36717710 | 36717895 | MYH9   | NM_002473    | 41 | 40 | 7     | 64      | 629  | 27856  | 149,76 | 100         |
| chr22 | 36718473 | 36718691 | MYH9   | NM_002473    | 41 | 40 | 6     | 93      | 32   | 1323   | 6,04   | 100         |
| chr22 | 36722517 | 36722726 | MYH9   | NM_002473    | 41 | 40 | 5     | 94      | 253  | 11183  | 53,25  | 100         |
| chr22 | 36723431 | 36723613 | MYH9   | NM_002473    | 41 | 40 | 4     | 28      | 631  | 26183  | 143,08 | 100         |
| chr22 | 36737464 | 36737649 | MYH9   | NM_002473    | 41 | 40 | 3     | 157     | 98   | 3795   | 20,4   | 68,8        |
| chr22 | 36745018 | 36745357 | MYH9   | NM_002473    | 41 | 40 | 2     | 333     | 2551 | 117718 | 346,23 | 79,3        |
| chr22 | 38097333 | 38097524 | TRIOBP | NM_001039141 | 24 | 21 | 3     | 114     | 690  | 28905  | 150,55 | 100         |
| chr22 | 38106466 | 38106672 | TRIOBP | NM_001039141 | 24 | 21 | 4     | 140     | 171  | 7062   | 34,12  | 77,1        |
| chr22 | 38109286 | 38109492 | TRIOBP | NM_001039141 | 24 | 21 | 5     | 202     | 370  | 16385  | 79,15  | 65,8        |
| chr22 | 38111683 | 38111895 | TRIOBP | NM_001039141 | 24 | 21 | 6     | 172     | 44   | 1873   | 8,79   | 73,3        |
| chr22 | 38119161 | 38119764 | TRIOBP | NM_001039141 | 24 | 21 | 7     | 3319    | 2904 | 135469 | 224,29 | 17,3        |
| chr22 | 38120936 | 38122469 | TRIOBP | NM_001039141 | 24 | 21 | 7     | 3319    | 5880 | 282062 | 183,87 | 46,2        |
| chr22 | 38129189 | 38129398 | TRIOBP | NM_001039141 | 24 | 21 | 8     | 115     | 40   | 1649   | 7,85   | 81,7        |
| chr22 | 38130462 | 38131542 | TRIOBP | NM_001039141 | 24 | 21 | 9     | 1044    | 519  | 24060  | 22,26  | 94,6        |
| chr22 | 38134524 | 38134715 | TRIOBP | NM_001039141 | 24 | 21 | 10    | 78      | 327  | 12499  | 65,1   | 85,9        |
| chr22 | 38136891 | 38137115 | TRIOBP | NM_001039141 | 24 | 21 | 11    | 138     | 101  | 4728   | 21,01  | 100         |
| chr22 | 38147721 | 38147894 | TRIOBP | NM_001039141 | 24 | 21 | 12    | 57      | 130  | 6074   | 34,91  | 100         |
| chr22 | 38150815 | 38151163 | TRIOBP | NM_001039141 | 24 | 21 | 13,14 | 108,90  | 870  | 40108  | 114,92 | 100.0,62.2  |
| chr22 | 38151556 | 38151741 | TRIOBP | NM_001039141 | 24 | 21 | 15    | 110     | 938  | 38941  | 209,36 | 100         |
| chr22 | 38153550 | 38154091 | TRIOBP | NM_001039141 | 24 | 21 | 16    | 526     | 77   | 3242   | 5,98   | 89,7        |
| chr22 | 38155060 | 38155595 | TRIOBP | NM_001039141 | 24 | 21 | 17    | 111     | 644  | 29888  | 55,76  | 100         |



|       |           |           |        |              |    |    |          |          |      |        |        |                   |
|-------|-----------|-----------|--------|--------------|----|----|----------|----------|------|--------|--------|-------------------|
| chr22 | 38161695  | 38161922  | TRIOBP | NM_001039141 | 24 | 21 | 18       | 148      | 48   | 2005   | 8,79   | 87,8              |
| chr22 | 38163956  | 38164168  | TRIOBP | NM_001039141 | 24 | 21 | 19       | 103      | 856  | 35852  | 168,32 | 85,4              |
| chr22 | 38164956  | 38165340  | TRIOBP | NM_001039141 | 24 | 21 | 20,21    | 160.114  | 149  | 6840   | 17,77  | 100.0,63.2        |
| chr22 | 38167676  | 38167986  | TRIOBP | NM_001039141 | 24 | 21 | 22       | 87       | 349  | 15593  | 50,14  | 78,2              |
| chr22 | 38168567  | 38168746  | TRIOBP | NM_001039141 | 24 | 21 | 23       | 162      | 376  | 15704  | 87,24  | 85,8              |
| chr22 | 38369426  | 38370156  | SOX10  | NM_006941    | 4  | 3  | 4        | 704      | 989  | 45150  | 61,76  | 93                |
| chr22 | 38373918  | 38374192  | SOX10  | NM_006941    | 4  | 3  | 3        | 269      | 68   | 2837   | 10,32  | 83,6              |
| chr22 | 38379429  | 38379869  | SOX10  | NM_006941    | 4  | 3  | 2        | 428      | 115  | 5219   | 11,83  | 84,8              |
| chr9  | 140093356 | 140095221 | TPRN   | NM_001128228 | 4  | 4  | 1        | 1725     | 446  | 20358  | 10,91  | 100               |
| chrX  | 21755581  | 21755781  | SMPX   | NM_014332    | 5  | 3  | 4        | 135      | 497  | 21821  | 108,56 | 74,8              |
| chrX  | 21761882  | 21762070  | SMPX   | NM_014332    | 5  | 3  | 3        | 87       | 66   | 2767   | 14,64  | 83,9              |
| chrX  | 21772251  | 21772445  | SMPX   | NM_014332    | 5  | 3  | 2        | 45       | 304  | 12256  | 62,85  | 100               |
| chrX  | 82763268  | 82764517  | POU3F4 | NM_000307    | 1  | 1  | 1        | 1086     | 3505 | 160658 | 128,53 | 100               |
| chrX  | 100601604 | 100601724 | TIMM8A | NM_004085    | 2  | 2  | 2        | 162      | 216  | 8581   | 70,92  | 27,8              |
| chrX  | 100603380 | 100603749 | TIMM8A | NM_004085    | 2  | 2  | 1        | 132      | 794  | 36315  | 98,15  | 100               |
| chrX  | 106882585 | 106882791 | PRPS1  | NM_002764    | 7  | 7  | 2        | 184      | 217  | 8312   | 40,15  | 67,4              |
| chrX  | 106884176 | 106884438 | PRPS1  | NM_002764    | 7  | 7  | 3        | 99       | 659  | 28929  | 110    | 55,6              |
| chrX  | 106885620 | 106885814 | PRPS1  | NM_002764    | 7  | 7  | 4        | 125      | 622  | 25469  | 130,61 | 80,8              |
| chrX  | 106888468 | 106888665 | PRPS1  | NM_002764    | 7  | 7  | 5        | 174      | 581  | 22922  | 115,77 | 64,9              |
| chrX  | 106890872 | 106891078 | PRPS1  | NM_002764    | 7  | 7  | 6        | 160      | 352  | 15548  | 75,11  | 77,5              |
| chrX  | 106893096 | 106893400 | PRPS1  | NM_002764    | 7  | 7  | 7        | 93       | 549  | 26117  | 85,63  | 100               |
| chrX  | 107683180 | 107683448 | COL4A5 | NM_033380    | 51 | 51 | 1        | 81       | 285  | 13154  | 48,9   | 100               |
| chrX  | 107782905 | 107783093 | COL4A5 | NM_033380    | 51 | 51 | 2        | 60       | 102  | 4564   | 24,15  | 100               |
| chrX  | 107802193 | 107802363 | COL4A5 | NM_033380    | 51 | 51 | 3        | 90       | 92   | 3947   | 23,08  | 77,8              |
| chrX  | 107807045 | 107807230 | COL4A5 | NM_033380    | 51 | 51 | 4        | 45       | 103  | 3726   | 20,03  | 100               |
| chrX  | 107811911 | 107812123 | COL4A5 | NM_033380    | 51 | 51 | 6        | 63       | 151  | 6283   | 29,5   | 100               |
| chrX  | 107814560 | 107814766 | COL4A5 | NM_033380    | 51 | 51 | 7        | 54       | 237  | 10019  | 48,4   | 100               |
| chrX  | 107814968 | 107815153 | COL4A5 | NM_033380    | 51 | 51 | 8        | 27       | 195  | 7514   | 40,4   | 100               |
| chrX  | 107816740 | 107816946 | COL4A5 | NM_033380    | 51 | 51 | 9        | 81       | 359  | 15917  | 76,89  | 100               |
| chrX  | 107819070 | 107819276 | COL4A5 | NM_033380    | 51 | 51 | 10       | 63       | 85   | 3592   | 17,35  | 100               |
| chrX  | 107821180 | 107821620 | COL4A5 | NM_033380    | 51 | 51 | 11,12,13 | 36,42,93 | 333  | 15288  | 34,67  | 100.0,100.0,100.0 |
| chrX  | 107823798 | 107824010 | COL4A5 | NM_033380    | 51 | 51 | 14,15    | 54,57    | 128  | 5615   | 26,36  | 35.2,100.0        |
| chrX  | 107824164 | 107824367 | COL4A5 | NM_033380    | 51 | 51 | 16       | 45       | 327  | 13915  | 68,21  | 100               |
| chrX  | 107826010 | 107826216 | COL4A5 | NM_033380    | 51 | 51 | 17       | 54       | 282  | 12771  | 61,7   | 100               |
| chrX  | 107827631 | 107827834 | COL4A5 | NM_033380    | 51 | 51 | 18       | 42       | 58   | 2202   | 10,79  | 100               |
| chrX  | 107829825 | 107830052 | COL4A5 | NM_033380    | 51 | 51 | 19       | 133      | 49   | 2295   | 10,07  | 100               |
| chrX  | 107834214 | 107834399 | COL4A5 | NM_033380    | 51 | 51 | 20       | 174      | 104  | 4557   | 24,5   | 64,4              |
| chrX  | 107834726 | 107834944 | COL4A5 | NM_033380    | 51 | 51 | 21       | 84       | 96   | 3808   | 17,39  | 100               |
| chrX  | 107838702 | 107838917 | COL4A5 | NM_033380    | 51 | 51 | 22       | 93       | 321  | 14135  | 65,44  | 100               |
| chrX  | 107840207 | 107840383 | COL4A5 | NM_033380    | 51 | 51 | 23       | 71       | 41   | 1777   | 10,04  | 100               |
| chrX  | 107840539 | 107840742 | COL4A5 | NM_033380    | 51 | 51 | 24       | 192      | 197  | 8039   | 39,41  | 70,8              |
| chrX  | 107841936 | 107842157 | COL4A5 | NM_033380    | 51 | 51 | 25       | 169      | 187  | 8219   | 37,02  | 97,6              |
| chrX  | 107844550 | 107844747 | COL4A5 | NM_033380    | 51 | 51 | 26       | 93       | 332  | 15592  | 78,75  | 100               |
| chrX  | 107845081 | 107845305 | COL4A5 | NM_033380    | 51 | 51 | 27       | 105      | 159  | 6839   | 30,4   | 100               |
| chrX  | 107846127 | 107846351 | COL4A5 | NM_033380    | 51 | 51 | 28       | 98       | 238  | 8934   | 39,71  | 100               |
| chrX  | 107849880 | 107850071 | COL4A5 | NM_033380    | 51 | 51 | 29       | 151      | 531  | 23022  | 119,91 | 66,2              |
| chrX  | 107858088 | 107858312 | COL4A5 | NM_033380    | 51 | 51 | 30       | 114      | 216  | 9737   | 43,28  | 100               |
| chrX  | 107863460 | 107863684 | COL4A5 | NM_033380    | 51 | 51 | 31       | 168      | 281  | 10556  | 46,92  | 100               |
| chrX  | 107864971 | 107865192 | COL4A5 | NM_033380    | 51 | 51 | 32       | 90       | 176  | 7396   | 33,32  | 100               |
| chrX  | 107865865 | 107866095 | COL4A5 | NM_033380    | 51 | 51 | 33       | 150      | 59   | 2707   | 11,72  | 100               |
| chrX  | 107867399 | 107867629 | COL4A5 | NM_033380    | 51 | 51 | 34       | 99       | 169  | 7503   | 32,48  | 100               |

|      |           |           |        |           |    |    |    |     |     |       |        |      |
|------|-----------|-----------|--------|-----------|----|----|----|-----|-----|-------|--------|------|
| chrX | 107868843 | 107869064 | COL4A5 | NM_033380 | 51 | 51 | 35 | 90  | 825 | 35684 | 160,74 | 100  |
| chrX | 107869368 | 107869722 | COL4A5 | NM_033380 | 51 | 51 | 36 | 140 | 435 | 19931 | 56,14  | 100  |
| chrX | 107898598 | 107898783 | COL4A5 | NM_033380 | 51 | 51 | 37 | 127 | 722 | 29301 | 157,53 | 70,9 |
| chrX | 107908661 | 107908876 | COL4A5 | NM_033380 | 51 | 51 | 38 | 81  | 152 | 6798  | 31,47  | 100  |
| chrX | 107909659 | 107909883 | COL4A5 | NM_033380 | 51 | 51 | 39 | 99  | 116 | 4965  | 22,07  | 100  |
| chrX | 107910284 | 107910475 | COL4A5 | NM_033380 | 51 | 51 | 40 | 51  | 154 | 6579  | 34,27  | 100  |
| chrX | 107911490 | 107911672 | COL4A5 | NM_033380 | 51 | 51 | 41 | 188 | 295 | 12007 | 65,61  | 66   |
| chrX | 107920641 | 107920817 | COL4A5 | NM_033380 | 51 | 51 | 42 | 137 | 373 | 15800 | 89,27  | 66,4 |
| chrX | 107923832 | 107924112 | COL4A5 | NM_033380 | 51 | 51 | 43 | 73  | 640 | 28671 | 102,03 | 100  |
| chrX | 107924884 | 107925081 | COL4A5 | NM_033380 | 51 | 51 | 45 | 129 | 455 | 20608 | 104,08 | 71,3 |
| chrX | 107929155 | 107929334 | COL4A5 | NM_033380 | 51 | 51 | 46 | 99  | 702 | 27463 | 152,57 | 74,7 |
| chrX | 107930783 | 107930968 | COL4A5 | NM_033380 | 51 | 51 | 47 | 213 | 570 | 24660 | 132,58 | 66,7 |
| chrX | 107935948 | 107936124 | COL4A5 | NM_033380 | 51 | 51 | 48 | 178 | 399 | 16877 | 95,35  | 82,6 |
| chrX | 107938065 | 107938244 | COL4A5 | NM_033380 | 51 | 51 | 49 | 115 | 663 | 28627 | 159,04 | 75,7 |
| chrX | 107938554 | 107938751 | COL4A5 | NM_033380 | 51 | 51 | 50 | 173 | 310 | 13532 | 68,34  | 67,1 |
| chrX | 107939499 | 107939776 | COL4A5 | NM_033380 | 51 | 51 | 51 | 82  | 597 | 26449 | 95,14  | 100  |

Median 72,175 99,95

S4 Table: List of the intellectual disability genes and coverage data.

| Chromosome | Start position | End position | Gene name | Gene id      | Total exons | Total coding exons | Component nr | Exon size       | reads | bps    | coverage | Overlap %               |
|------------|----------------|--------------|-----------|--------------|-------------|--------------------|--------------|-----------------|-------|--------|----------|-------------------------|
| chr1       | 2160177        | 2161251      | SKI       | NM_003036    | 7           | 7                  | 1            | 969             | 315   | 14156  | 13,17    | 100                     |
| chr1       | 2234380        | 2234802      | SKI       | NM_003036    | 7           | 7                  | 2,3          | 126.116         | 317   | 14348  | 33,92    | 100,0,68.1              |
| chr1       | 2235344        | 2235609      | SKI       | NM_003036    | 7           | 7                  | 4            | 263             | 52    | 2409   | 9,06     | 75,3                    |
| chr1       | 2235677        | 2235972      | SKI       | NM_003036    | 7           | 7                  | 5            | 293             | 171   | 7783   | 26,29    | 82,3                    |
| chr1       | 2237376        | 2237650      | SKI       | NM_003036    | 7           | 7                  | 6            | 231             | 28    | 1270   | 4,62     | 83,1                    |
| chr1       | 2238059        | 2238250      | SKI       | NM_003036    | 7           | 7                  | 7            | 189             | 1     | 50     | 0,26     | 77,2                    |
| chr1       | 2337038        | 2337229      | PEX10     | NM_153818    | 6           | 6                  | 6            | 69              | 775   | 33276  | 173,31   | 36,2                    |
| chr1       | 2337931        | 2338448      | PEX10     | NM_153818    | 6           | 6                  | 5,4          | 136.236         | 468   | 21384  | 41,28    | 94,1,100,0              |
| chr1       | 2339879        | 2340313      | PEX10     | NM_153818    | 6           | 6                  | 3            | 407             | 602   | 23260  | 53,47    | 100                     |
| chr1       | 2341794        | 2342018      | PEX10     | NM_153818    | 6           | 6                  | 2            | 81              | 594   | 25848  | 114,88   | 100                     |
| chr1       | 2343878        | 2344069      | PEX10     | NM_153818    | 6           | 6                  | 1            | 112             | 0     | 0      | 0        | 57,1                    |
| chr1       | 24122354       | 24122776     | GALE      | NM_001127621 | 11          | 10                 | 11,10        | 59.115          | 335   | 15052  | 35,58    | 100,0,100,0             |
| chr1       | 24122991       | 24123650     | GALE      | NM_001127621 | 11          | 10                 | 9,8,7,6      | 78,86,67,114    | 1997  | 93185  | 141,19   | 100,0,100,0,100,0,100,0 |
| chr1       | 24124220       | 24124438     | GALE      | NM_001127621 | 11          | 10                 | 5            | 177             | 512   | 22794  | 104,08   | 80,2                    |
| chr1       | 24124566       | 24124763     | GALE      | NM_001127621 | 11          | 10                 | 4            | 114             | 597   | 27330  | 138,03   | 100                     |
| chr1       | 24125061       | 24125575     | GALE      | NM_001127621 | 11          | 10                 | 3,2          | 116.121         | 2023  | 94445  | 183,39   | 100,0,100,0             |
| chr1       | 24172073       | 24172433     | FUCA1     | NM_000147    | 8           | 8                  | 8            | 141             | 624   | 28875  | 79,99    | 100                     |
| chr1       | 24172510       | 24172725     | FUCA1     | NM_000147    | 8           | 8                  | 7            | 100             | 101   | 4490   | 20,79    | 100                     |
| chr1       | 24175202       | 24175408     | FUCA1     | NM_000147    | 8           | 8                  | 6            | 191             | 183   | 7891   | 38,12    | 67                      |
| chr1       | 24180816       | 24181019     | FUCA1     | NM_000147    | 8           | 8                  | 5            | 201             | 311   | 14687  | 72       | 84,6                    |
| chr1       | 24186183       | 24186377     | FUCA1     | NM_000147    | 8           | 8                  | 4            | 106             | 656   | 28289  | 145,07   | 84,9                    |
| chr1       | 24189658       | 24189837     | FUCA1     | NM_000147    | 8           | 8                  | 3            | 138             | 132   | 5582   | 31,01    | 75,4                    |
| chr1       | 24192010       | 24192210     | FUCA1     | NM_000147    | 8           | 8                  | 2            | 135             | 725   | 31671  | 157,57   | 78,5                    |
| chr1       | 24194373       | 24194807     | FUCA1     | NM_000147    | 8           | 8                  | 1            | 389             | 229   | 10344  | 23,78    | 100                     |
| chr1       | 27022773       | 27023992     | ARID1A    | NM_006015    | 20          | 20                 | 1            | 1137            | 59    | 2603   | 2,13     | 96,6                    |
| chr1       | 27056045       | 27056304     | ARID1A    | NM_006015    | 20          | 20                 | 2            | 213             | 784   | 36323  | 139,7    | 76,5                    |
| chr1       | 27057609       | 27058073     | ARID1A    | NM_006015    | 20          | 20                 | 3            | 453             | 1818  | 84413  | 181,53   | 95,1                    |
| chr1       | 27059067       | 27059261     | ARID1A    | NM_006015    | 20          | 20                 | 4            | 117             | 158   | 6922   | 35,5     | 81,2                    |
| chr1       | 27087281       | 27087534     | ARID1A    | NM_006015    | 20          | 20                 | 5            | 241             | 933   | 39794  | 156,67   | 78                      |
| chr1       | 27087750       | 27087959     | ARID1A    | NM_006015    | 20          | 20                 | 6            | 90              | 405   | 17310  | 82,43    | 94,4                    |
| chr1       | 27088551       | 27088754     | ARID1A    | NM_006015    | 20          | 20                 | 7            | 168             | 367   | 15843  | 77,66    | 66,7                    |
| chr1       | 27089484       | 27089862     | ARID1A    | NM_006015    | 20          | 20                 | 8            | 313             | 786   | 35471  | 93,59    | 93,6                    |
| chr1       | 27092773       | 27093136     | ARID1A    | NM_006015    | 20          | 20                 | 9,10         | 146.110         | 802   | 37924  | 104,19   | 58,2,100,0              |
| chr1       | 27094213       | 27094413     | ARID1A    | NM_006015    | 20          | 20                 | 11           | 210             | 257   | 11425  | 56,84    | 63,3                    |
| chr1       | 27097550       | 27097738     | ARID1A    | NM_006015    | 20          | 20                 | 12           | 208             | 605   | 26308  | 139,2    | 62                      |
| chr1       | 27099016       | 27099521     | ARID1A    | NM_006015    | 20          | 20                 | 13,14        | 133.176         | 1089  | 52005  | 102,78   | 81,2,100,0              |
| chr1       | 27099875       | 27100487     | ARID1A    | NM_006015    | 20          | 20                 | 15,16,17     | 151,138,97      | 2101  | 101218 | 165,12   | 74,8,100,0,100,0        |
| chr1       | 27100730       | 27101668     | ARID1A    | NM_006015    | 20          | 20                 | 18           | 892             | 2433  | 112556 | 119,87   | 95,2                    |
| chr1       | 27102121       | 27102457     | ARID1A    | NM_006015    | 20          | 20                 | 19           | 131             | 847   | 38721  | 114,9    | 59,5                    |
| chr1       | 27105450       | 27107333     | ARID1A    | NM_006015    | 20          | 20                 | 20           | 1734            | 6731  | 320232 | 169,97   | 100                     |
| chr1       | 27117148       | 27117348     | PIGV      | NM_017837    | 4           | 3                  | 2            | 78              | 575   | 24201  | 120,4    | 53,8                    |
| chr1       | 27120539       | 27121720     | PIGV      | NM_017837    | 4           | 3                  | 3            | 1122            | 5757  | 278649 | 235,74   | 99,6                    |
| chr1       | 27123996       | 27124504     | PIGV      | NM_017837    | 4           | 3                  | 4            | 282             | 2984  | 142485 | 279,93   | 100                     |
| chr1       | 43392650       | 43392862     | SLC2A1    | NM_006516    | 10          | 10                 | 10           | 201             | 482   | 20560  | 96,53    | 75,1                    |
| chr1       | 43393268       | 43393486     | SLC2A1    | NM_006516    | 10          | 10                 | 9            | 204             | 191   | 7938   | 36,25    | 100                     |
| chr1       | 43394535       | 43395692     | SLC2A1    | NM_006516    | 10          | 10                 | 8,7,6,5      | 102.105.188.163 | 2325  | 112575 | 97,22    | 100,0,100,0,100,0,91.4  |
| chr1       | 43396009       | 43396867     | SLC2A1    | NM_006516    | 10          | 10                 | 4,3          | 241.161         | 906   | 41990  | 48,88    | 100,0,93.8              |
| chr1       | 43408907       | 43409245     | SLC2A1    | NM_006516    | 10          | 10                 | 2            | 96              | 1527  | 70348  | 207,52   | 89,6                    |
| chr1       | 44201855       | 44202028     | ST3GAL3   | NM_174963    | 13          | 12                 | 2            | 163             | 973   | 40391  | 232,13   | 58,3                    |
| chr1       | 44257708       | 44257896     | ST3GAL3   | NM_174963    | 13          | 12                 | 3            | 48              | 80    | 3453   | 18,27    | 100                     |
| chr1       | 44280414       | 44280620     | ST3GAL3   | NM_174963    | 13          | 12                 | 4            | 43              | 448   | 20234  | 97,75    | 100                     |
| chr1       | 44290437       | 44290655     | ST3GAL3   | NM_174963    | 13          | 12                 | 5            | 162             | 133   | 5512   | 25,17    | 79                      |
| chr1       | 44303782       | 44303976     | ST3GAL3   | NM_174963    | 13          | 12                 | 6            | 93              | 1581  | 68330  | 350,41   | 92,5                    |
| chr1       | 44360001       | 44360186     | ST3GAL3   | NM_174963    | 13          | 12                 | 7            | 95              | 610   | 25460  | 136,88   | 100                     |
| chr1       | 44363793       | 44363966     | ST3GAL3   | NM_174963    | 13          | 12                 | 8            | 64              | 560   | 22051  | 126,73   | 93,8                    |

|      |          |          |         |              |    |    |          |            |      |        |        |                  |
|------|----------|----------|---------|--------------|----|----|----------|------------|------|--------|--------|------------------|
| chr1 | 44364835 | 44365023 | ST3GAL3 | NM_174963    | 13 | 12 | 9        | 96         | 412  | 16381  | 86,67  | 100              |
| chr1 | 44365207 | 44365478 | ST3GAL3 | NM_174963    | 13 | 12 | 10       | 187        | 622  | 25610  | 94,15  | 100              |
| chr1 | 44386048 | 44386233 | ST3GAL3 | NM_174963    | 13 | 12 | 11       | 147        | 342  | 14518  | 78,05  | 100              |
| chr1 | 44386450 | 44386668 | ST3GAL3 | NM_174963    | 13 | 12 | 12       | 147        | 280  | 11773  | 53,76  | 100              |
| chr1 | 44395611 | 44395983 | ST3GAL3 | NM_174963    | 13 | 12 | 13       | 90         | 812  | 37963  | 101,78 | 100              |
| chr1 | 45965874 | 45966148 | MMACHC  | NM_015506    | 4  | 4  | 1        | 81         | 1065 | 48523  | 176,45 | 100              |
| chr1 | 45973099 | 45973299 | MMACHC  | NM_015506    | 4  | 4  | 2        | 195        | 553  | 22546  | 112,17 | 63,6             |
| chr1 | 45973793 | 45974011 | MMACHC  | NM_015506    | 4  | 4  | 3        | 153        | 409  | 17565  | 80,21  | 83,7             |
| chr1 | 45974379 | 45974988 | MMACHC  | NM_015506    | 4  | 4  | 4        | 420        | 3488 | 165716 | 271,67 | 100              |
| chr1 | 46654274 | 46654717 | POMGNT1 | NM_001243766 | 23 | 22 | 23       | 262        | 880  | 42360  | 95,41  | 100              |
| chr1 | 46654825 | 46655188 | POMGNT1 | NM_001243766 | 23 | 22 | 22,21    | 116,84     | 204  | 8770   | 24,09  | 100.0,39.3       |
| chr1 | 46655508 | 46655693 | POMGNT1 | NM_001243766 | 23 | 22 | 20       | 136        | 354  | 15175  | 81,59  | 100              |
| chr1 | 46656015 | 46656191 | POMGNT1 | NM_001243766 | 23 | 22 | 19       | 45         | 712  | 28345  | 160,14 | 100              |
| chr1 | 46656380 | 46656580 | POMGNT1 | NM_001243766 | 23 | 22 | 18       | 65         | 136  | 5371   | 26,72  | 100              |
| chr1 | 46657812 | 46658332 | POMGNT1 | NM_001243766 | 23 | 22 | 17,16,15 | 126,129,73 | 1757 | 81742  | 156,89 | 66.7,100.0,100.0 |
| chr1 | 46658491 | 46658691 | POMGNT1 | NM_001243766 | 23 | 22 | 14       | 59         | 1326 | 56816  | 282,67 | 100              |
| chr1 | 46658755 | 46659278 | POMGNT1 | NM_001243766 | 23 | 22 | 13,12,11 | 42,84,76   | 2350 | 109340 | 208,66 | 100.0,100.0,56.6 |
| chr1 | 46659422 | 46659643 | POMGNT1 | NM_001243766 | 23 | 22 | 10       | 71         | 1368 | 57193  | 257,63 | 100              |
| chr1 | 46659977 | 46660408 | POMGNT1 | NM_001243766 | 23 | 22 | 9,8      | 128,99     | 1379 | 64119  | 148,42 | 75.8,100.0       |
| chr1 | 46660537 | 46660749 | POMGNT1 | NM_001243766 | 23 | 22 | 7        | 118        | 127  | 5152   | 24,19  | 82,2             |
| chr1 | 46661357 | 46661717 | POMGNT1 | NM_001243766 | 23 | 22 | 6,5      | 114,66     | 512  | 23316  | 64,59  | 100.0,51.5       |
| chr1 | 46662474 | 46662822 | POMGNT1 | NM_001243766 | 23 | 22 | 4,3      | 119,115    | 1208 | 57144  | 163,74 | 40.3,100.0       |
| chr1 | 46663342 | 46663521 | POMGNT1 | NM_001243766 | 23 | 22 | 2        | 120        | 296  | 12161  | 67,56  | 100              |
| chr1 | 46665388 | 46666003 | POMGNT1 | NM_001243766 | 23 | 22 | 1        | 601        | 1031 | 47256  | 76,71  | 98,2             |
| chr1 | 47716669 | 47717663 | STIL    | NM_001048166 | 17 | 16 | 17       | 787        | 2755 | 133720 | 134,39 | 100              |
| chr1 | 47725954 | 47726213 | STIL    | NM_001048166 | 17 | 16 | 16       | 251        | 422  | 20285  | 78,02  | 100              |
| chr1 | 47728599 | 47728820 | STIL    | NM_001048166 | 17 | 16 | 15       | 214        | 554  | 23352  | 105,19 | 88,8             |
| chr1 | 47735300 | 47735577 | STIL    | NM_001048166 | 17 | 16 | 14       | 232        | 936  | 42543  | 153,03 | 100              |
| chr1 | 47737715 | 47737939 | STIL    | NM_001048166 | 17 | 16 | 13       | 166        | 477  | 20543  | 91,3   | 100              |
| chr1 | 47745860 | 47746866 | STIL    | NM_001048166 | 17 | 16 | 12       | 969        | 2962 | 143810 | 142,81 | 98,5             |
| chr1 | 47748003 | 47748197 | STIL    | NM_001048166 | 17 | 16 | 11       | 115        | 242  | 9835   | 50,44  | 100              |
| chr1 | 47753246 | 47753437 | STIL    | NM_001048166 | 17 | 16 | 10       | 110        | 450  | 19921  | 103,76 | 79,1             |
| chr1 | 47755063 | 47755251 | STIL    | NM_001048166 | 17 | 16 | 9        | 151        | 339  | 14863  | 78,64  | 96               |
| chr1 | 47759063 | 47759257 | STIL    | NM_001048166 | 17 | 16 | 8        | 87         | 239  | 10278  | 52,71  | 100              |
| chr1 | 47761357 | 47761545 | STIL    | NM_001048166 | 17 | 16 | 7        | 84         | 264  | 11821  | 62,54  | 100              |
| chr1 | 47765575 | 47765846 | STIL    | NM_001048166 | 17 | 16 | 6        | 248        | 695  | 31366  | 115,32 | 100              |
| chr1 | 47767256 | 47767453 | STIL    | NM_001048166 | 17 | 16 | 5        | 188        | 275  | 11639  | 58,78  | 87,8             |
| chr1 | 47767897 | 47768079 | STIL    | NM_001048166 | 17 | 16 | 4        | 113        | 454  | 19042  | 104,05 | 100              |
| chr1 | 47770493 | 47770838 | STIL    | NM_001048166 | 17 | 16 | 3        | 108        | 194  | 8931   | 25,81  | 100              |
| chr1 | 47775874 | 47776059 | STIL    | NM_001048166 | 17 | 16 | 2        | 44         | 185  | 7696   | 41,38  | 100              |
| chr1 | 52838779 | 52839059 | ORC1    | NM_004153    | 17 | 16 | 17       | 195        | 1055 | 50748  | 180,6  | 100              |
| chr1 | 52840395 | 52840580 | ORC1    | NM_004153    | 17 | 16 | 16       | 88         | 86   | 2518   | 13,54  | 100              |
| chr1 | 52841011 | 52841217 | ORC1    | NM_004153    | 17 | 16 | 15       | 170        | 408  | 16986  | 82,06  | 68,2             |
| chr1 | 52847198 | 52847407 | ORC1    | NM_004153    | 17 | 16 | 14       | 120        | 619  | 26428  | 125,85 | 78,3             |
| chr1 | 52849114 | 52849314 | ORC1    | NM_004153    | 17 | 16 | 13       | 150        | 209  | 9001   | 44,78  | 85,3             |
| chr1 | 52849524 | 52849727 | ORC1    | NM_004153    | 17 | 16 | 12       | 108        | 212  | 9554   | 46,83  | 79,6             |
| chr1 | 52850135 | 52850347 | ORC1    | NM_004153    | 17 | 16 | 11       | 172        | 525  | 21797  | 102,33 | 73,3             |
| chr1 | 52850852 | 52851034 | ORC1    | NM_004153    | 17 | 16 | 10       | 102        | 265  | 10769  | 58,85  | 81,4             |
| chr1 | 52851544 | 52851729 | ORC1    | NM_004153    | 17 | 16 | 9        | 98         | 233  | 10258  | 55,15  | 79,6             |
| chr1 | 52854180 | 52854356 | ORC1    | NM_004153    | 17 | 16 | 8        | 196        | 209  | 8689   | 49,09  | 66,3             |
| chr1 | 52854798 | 52855004 | ORC1    | NM_004153    | 17 | 16 | 7        | 105        | 783  | 33950  | 164,01 | 100              |
| chr1 | 52859177 | 52859534 | ORC1    | NM_004153    | 17 | 16 | 6        | 361        | 623  | 29111  | 81,32  | 82,8             |
| chr1 | 52861750 | 52862125 | ORC1    | NM_004153    | 17 | 16 | 5        | 319        | 1095 | 52219  | 138,88 | 90               |
| chr1 | 52863408 | 52863605 | ORC1    | NM_004153    | 17 | 16 | 4        | 179        | 923  | 40580  | 204,95 | 71,5             |
| chr1 | 52866997 | 52867197 | ORC1    | NM_004153    | 17 | 16 | 3        | 128        | 1056 | 46627  | 231,98 | 100              |
| chr1 | 52867746 | 52867964 | ORC1    | NM_004153    | 17 | 16 | 2        | 95         | 405  | 17355  | 79,25  | 100              |
| chr1 | 55317794 | 55318018 | DHCR24  | NM_014762    | 9  | 9  | 9        | 154        | 257  | 11298  | 50,21  | 73,4             |

|      |           |           |        |              |    |    |       |        |      |       |        |             |
|------|-----------|-----------|--------|--------------|----|----|-------|--------|------|-------|--------|-------------|
| chr1 | 55319050  | 55319241  | DHCR24 | NM_014762    | 9  | 9  | 8     | 179    | 643  | 28181 | 146,78 | 75,4        |
| chr1 | 55319783  | 55319971  | DHCR24 | NM_014762    | 9  | 9  | 7     | 198    | 68   | 3101  | 16,41  | 63,1        |
| chr1 | 55331010  | 55331192  | DHCR24 | NM_014762    | 9  | 9  | 6     | 144    | 613  | 27277 | 149,05 | 76,4        |
| chr1 | 55337077  | 55337363  | DHCR24 | NM_014762    | 9  | 9  | 5     | 264    | 583  | 25822 | 89,97  | 79,5        |
| chr1 | 55340655  | 55340861  | DHCR24 | NM_014762    | 9  | 9  | 4     | 119    | 703  | 30578 | 147,72 | 80,7        |
| chr1 | 55341621  | 55341842  | DHCR24 | NM_014762    | 9  | 9  | 3     | 106    | 72   | 2879  | 12,97  | 94,3        |
| chr1 | 55349223  | 55349393  | DHCR24 | NM_014762    | 9  | 9  | 2     | 156    | 1559 | 64798 | 378,94 | 66          |
| chr1 | 55352221  | 55352824  | DHCR24 | NM_014762    | 9  | 9  | 1     | 231    | 2003 | 95244 | 157,69 | 100         |
| chr1 | 63836512  | 63836795  | ALG6   | NM_013339    | 15 | 14 | 2     | 82     | 1059 | 48921 | 172,26 | 100         |
| chr1 | 63862110  | 63862280  | ALG6   | NM_013339    | 15 | 14 | 3     | 85     | 269  | 11158 | 65,25  | 100         |
| chr1 | 63867890  | 63868090  | ALG6   | NM_013339    | 15 | 14 | 4     | 90     | 138  | 5689  | 28,3   | 100         |
| chr1 | 63870073  | 63870258  | ALG6   | NM_013339    | 15 | 14 | 5     | 89     | 146  | 5988  | 32,19  | 100         |
| chr1 | 63871907  | 63872104  | ALG6   | NM_013339    | 15 | 14 | 6     | 83     | 165  | 7094  | 35,83  | 100         |
| chr1 | 63872650  | 63872868  | ALG6   | NM_013339    | 15 | 14 | 7     | 65     | 277  | 11858 | 54,15  | 100         |
| chr1 | 63876807  | 63876995  | ALG6   | NM_013339    | 15 | 14 | 8     | 186    | 407  | 18230 | 96,46  | 96,2        |
| chr1 | 63877564  | 63877779  | ALG6   | NM_013339    | 15 | 14 | 9     | 136    | 462  | 19309 | 89,39  | 100         |
| chr1 | 63879653  | 63879841  | ALG6   | NM_013339    | 15 | 14 | 10    | 86     | 436  | 18901 | 100,01 | 100         |
| chr1 | 63881497  | 63881673  | ALG6   | NM_013339    | 15 | 14 | 11    | 85     | 532  | 20474 | 115,67 | 100         |
| chr1 | 63884990  | 63885160  | ALG6   | NM_013339    | 15 | 14 | 12    | 71     | 71   | 3163  | 18,5   | 100         |
| chr1 | 63894383  | 63894820  | ALG6   | NM_013339    | 15 | 14 | 13,14 | 69.199 | 150  | 6803  | 15,53  | 100.0,100.0 |
| chr1 | 63902459  | 63902751  | ALG6   | NM_013339    | 15 | 14 | 15    | 198    | 717  | 32961 | 112,49 | 100         |
| chr1 | 97544416  | 97544773  | DPYD   | NM_000110    | 23 | 23 | 23    | 171    | 816  | 38247 | 106,84 | 100         |
| chr1 | 97547780  | 97547995  | DPYD   | NM_000110    | 23 | 23 | 22    | 141    | 248  | 10637 | 49,25  | 78          |
| chr1 | 97564043  | 97564246  | DPYD   | NM_000110    | 23 | 23 | 21    | 144    | 624  | 26880 | 131,76 | 100         |
| chr1 | 97658689  | 97658871  | DPYD   | NM_000110    | 23 | 23 | 20    | 180    | 126  | 5067  | 27,69  | 64,4        |
| chr1 | 97700423  | 97700620  | DPYD   | NM_000110    | 23 | 23 | 19    | 143    | 1265 | 54657 | 276,05 | 89,5        |
| chr1 | 97770702  | 97770899  | DPYD   | NM_000110    | 23 | 23 | 18    | 120    | 613  | 23374 | 118,05 | 70,8        |
| chr1 | 97771689  | 97771907  | DPYD   | NM_000110    | 23 | 23 | 17    | 121    | 357  | 15076 | 68,84  | 100         |
| chr1 | 97839127  | 97839303  | DPYD   | NM_000110    | 23 | 23 | 16    | 84     | 314  | 13306 | 75,18  | 88,1        |
| chr1 | 97847894  | 97848067  | DPYD   | NM_000110    | 23 | 23 | 15    | 69     | 225  | 9761  | 56,1   | 100         |
| chr1 | 97915551  | 97915721  | DPYD   | NM_000110    | 23 | 23 | 14    | 165    | 120  | 4868  | 28,47  | 64,8        |
| chr1 | 97981246  | 97981535  | DPYD   | NM_000110    | 23 | 23 | 13    | 216    | 419  | 19525 | 67,33  | 100         |
| chr1 | 98015122  | 98015316  | DPYD   | NM_000110    | 23 | 23 | 12    | 185    | 1184 | 46088 | 236,35 | 96,8        |
| chr1 | 98039350  | 98039550  | DPYD   | NM_000110    | 23 | 23 | 11    | 211    | 1331 | 57666 | 286,9  | 83,9        |
| chr1 | 98058710  | 98058898  | DPYD   | NM_000110    | 23 | 23 | 10    | 170    | 663  | 28770 | 152,22 | 73,5        |
| chr1 | 98060568  | 98060762  | DPYD   | NM_000110    | 23 | 23 | 9     | 108    | 195  | 8675  | 44,49  | 100         |
| chr1 | 98144558  | 98144764  | DPYD   | NM_000110    | 23 | 23 | 8     | 88     | 102  | 4387  | 21,19  | 100         |
| chr1 | 98157213  | 98157401  | DPYD   | NM_000110    | 23 | 23 | 7     | 82     | 236  | 10113 | 53,51  | 100         |
| chr1 | 98164928  | 98165137  | DPYD   | NM_000110    | 23 | 23 | 6     | 197    | 626  | 27179 | 129,42 | 89,3        |
| chr1 | 98186974  | 98187171  | DPYD   | NM_000110    | 23 | 23 | 5     | 162    | 445  | 18238 | 92,11  | 65,4        |
| chr1 | 98205921  | 98206121  | DPYD   | NM_000110    | 23 | 23 | 4     | 88     | 96   | 3974  | 19,77  | 100         |
| chr1 | 98293565  | 98293780  | DPYD   | NM_000110    | 23 | 23 | 3     | 83     | 444  | 18839 | 87,22  | 100         |
| chr1 | 98348768  | 98348977  | DPYD   | NM_000110    | 23 | 23 | 2     | 111    | 355  | 16317 | 77,7   | 100         |
| chr1 | 98386436  | 98386606  | DPYD   | NM_000110    | 23 | 23 | 1     | 39     | 74   | 3334  | 19,5   | 100         |
| chr1 | 100661709 | 100662066 | DBT    | NM_001918    | 11 | 11 | 11    | 168    | 747  | 33842 | 94,53  | 100         |
| chr1 | 100671732 | 100672190 | DBT    | NM_001918    | 11 | 11 | 10,9  | 72.192 | 390  | 16933 | 36,89  | 100.0,99.0  |
| chr1 | 100676164 | 100676423 | DBT    | NM_001918    | 11 | 11 | 8     | 78     | 593  | 25407 | 97,72  | 100         |
| chr1 | 100680334 | 100680531 | DBT    | NM_001918    | 11 | 11 | 7     | 167    | 495  | 21329 | 107,72 | 95,2        |
| chr1 | 100681461 | 100681729 | DBT    | NM_001918    | 11 | 11 | 6     | 217    | 509  | 23532 | 87,48  | 88          |
| chr1 | 100684145 | 100684333 | DBT    | NM_001918    | 11 | 11 | 5     | 122    | 705  | 32358 | 171,21 | 100         |
| chr1 | 100696324 | 100696554 | DBT    | NM_001918    | 11 | 11 | 4     | 182    | 122  | 5443  | 23,56  | 80,8        |
| chr1 | 100700962 | 100701165 | DBT    | NM_001918    | 11 | 11 | 3     | 76     | 87   | 4022  | 19,72  | 100         |
| chr1 | 100706353 | 100706547 | DBT    | NM_001918    | 11 | 11 | 2     | 124    | 156  | 6116  | 31,36  | 71          |
| chr1 | 100715241 | 100715423 | DBT    | NM_001918    | 11 | 11 | 1     | 51     | 1578 | 67111 | 366,73 | 100         |
| chr1 | 114437567 | 114438179 | AP4B1  | NM_001253852 | 10 | 10 | 10    | 428    | 845  | 39683 | 64,74  | 100         |
| chr1 | 114438333 | 114438702 | AP4B1  | NM_001253852 | 10 | 10 | 9     | 282    | 573  | 25816 | 69,77  | 100         |
| chr1 | 114438823 | 114439112 | AP4B1  | NM_001253852 | 10 | 10 | 8     | 208    | 871  | 38910 | 134,17 | 100         |

|      |           |           |         |              |    |    |       |           |      |        |        |                   |
|------|-----------|-----------|---------|--------------|----|----|-------|-----------|------|--------|--------|-------------------|
| chr1 | 114440359 | 114440553 | AP4B1   | NM_001253852 | 10 | 10 | 7     | 104       | 474  | 20731  | 106,31 | 88,5              |
| chr1 | 114441302 | 114441511 | AP4B1   | NM_001253852 | 10 | 10 | 6     | 84        | 226  | 10074  | 47,97  | 100               |
| chr1 | 114442494 | 114443100 | AP4B1   | NM_001253852 | 10 | 10 | 5     | 497       | 1168 | 54253  | 89,38  | 100               |
| chr1 | 114443903 | 114444088 | AP4B1   | NM_001253852 | 10 | 10 | 4     | 148       | 328  | 14070  | 75,65  | 69,6              |
| chr1 | 114444326 | 114444556 | AP4B1   | NM_001253852 | 10 | 10 | 3     | 131       | 515  | 22729  | 98,39  | 100               |
| chr1 | 114445303 | 114445565 | AP4B1   | NM_001253852 | 10 | 10 | 2     | 225       | 499  | 22981  | 87,38  | 80,9              |
| chr1 | 114447180 | 114447451 | AP4B1   | NM_001253852 | 10 | 10 | 1     | 113       | 550  | 25267  | 92,89  | 100               |
| chr1 | 120254561 | 120254835 | PHGDH   | NM_006623    | 12 | 12 | 1     | 138       | 588  | 26135  | 95,04  | 100               |
| chr1 | 120263694 | 120263882 | PHGDH   | NM_006623    | 12 | 12 | 2     | 152       | 697  | 29815  | 157,75 | 59,2              |
| chr1 | 120266003 | 120266185 | PHGDH   | NM_006623    | 12 | 12 | 3     | 66        | 690  | 29873  | 163,24 | 93,9              |
| chr1 | 120269534 | 120269814 | PHGDH   | NM_006623    | 12 | 12 | 5     | 99        | 489  | 22716  | 80,84  | 100               |
| chr1 | 120277179 | 120277459 | PHGDH   | NM_006623    | 12 | 12 | 6     | 133       | 1256 | 57491  | 204,59 | 100               |
| chr1 | 120277831 | 120278016 | PHGDH   | NM_006623    | 12 | 12 | 7     | 149       | 492  | 19901  | 106,99 | 66,4              |
| chr1 | 120279757 | 120279957 | PHGDH   | NM_006623    | 12 | 12 | 8     | 153       | 100  | 4308   | 21,43  | 86,9              |
| chr1 | 120282944 | 120283144 | PHGDH   | NM_006623    | 12 | 12 | 9     | 133       | 331  | 14300  | 71,14  | 100               |
| chr1 | 120284339 | 120284509 | PHGDH   | NM_006623    | 12 | 12 | 10    | 131       | 517  | 22688  | 132,68 | 91,6              |
| chr1 | 120285471 | 120285739 | PHGDH   | NM_006623    | 12 | 12 | 11    | 238       | 679  | 31778  | 118,13 | 82,8              |
| chr1 | 120286543 | 120286752 | PHGDH   | NM_006623    | 12 | 12 | 12    | 155       | 885  | 39212  | 186,72 | 78,1              |
| chr1 | 145516238 | 145516456 | PEX11B  | NM_003846    | 4  | 4  | 1     | 56        | 107  | 4607   | 21,04  | 100               |
| chr1 | 145517293 | 145517493 | PEX11B  | NM_003846    | 4  | 4  | 2     | 116       | 1523 | 63603  | 316,43 | 82,8              |
| chr1 | 145517996 | 145518202 | PEX11B  | NM_003846    | 4  | 4  | 3     | 202       | 1202 | 51830  | 250,39 | 65,3              |
| chr1 | 145522449 | 145523040 | PEX11B  | NM_003846    | 4  | 4  | 4     | 406       | 3190 | 151973 | 256,71 | 100               |
| chr1 | 153782504 | 153782772 | GATAD2B | NM_020699    | 11 | 10 | 11    | 134       | 454  | 19490  | 72,45  | 89,6              |
| chr1 | 153784256 | 153784693 | GATAD2B | NM_020699    | 11 | 10 | 10,9  | 118.111   | 895  | 43066  | 98,32  | 58,5,100.0        |
| chr1 | 153785774 | 153786001 | GATAD2B | NM_020699    | 11 | 10 | 8     | 203       | 491  | 20257  | 88,85  | 76,4              |
| chr1 | 153788717 | 153789095 | GATAD2B | NM_020699    | 11 | 10 | 7     | 316       | 815  | 37422  | 98,74  | 100               |
| chr1 | 153789757 | 153789972 | GATAD2B | NM_020699    | 11 | 10 | 6     | 171       | 823  | 36630  | 169,58 | 73,1              |
| chr1 | 153790556 | 153790738 | GATAD2B | NM_020699    | 11 | 10 | 5     | 132       | 401  | 17042  | 93,13  | 69,7              |
| chr1 | 153791202 | 153791396 | GATAD2B | NM_020699    | 11 | 10 | 4     | 132       | 1451 | 63570  | 326    | 98,5              |
| chr1 | 153792064 | 153792270 | GATAD2B | NM_020699    | 11 | 10 | 3     | 130       | 87   | 3772   | 18,22  | 100               |
| chr1 | 153800496 | 153800874 | GATAD2B | NM_020699    | 11 | 10 | 2     | 335       | 2676 | 123370 | 325,51 | 97,9              |
| chr1 | 154245820 | 154246491 | HAX1    | NM_006118    | 7  | 7  | 2,3   | 263.188   | 1542 | 73346  | 109,15 | 97.0,100.0        |
| chr1 | 154247496 | 154248250 | HAX1    | NM_006118    | 7  | 7  | 5,6,7 | 107,91,86 | 3652 | 173149 | 229,34 | 100.0,100.0,100.0 |
| chr1 | 154557189 | 154557875 | ADAR    | NM_001111    | 15 | 15 | 15,14 | 238.128   | 3205 | 156788 | 228,22 | 100.0,100.0       |
| chr1 | 154558259 | 154558438 | ADAR    | NM_001111    | 15 | 15 | 13    | 113       | 56   | 2303   | 12,79  | 73,5              |
| chr1 | 154558584 | 154558772 | ADAR    | NM_001111    | 15 | 15 | 12    | 183       | 560  | 22777  | 120,51 | 63,4              |
| chr1 | 154560624 | 154560836 | ADAR    | NM_001111    | 15 | 15 | 11    | 134       | 193  | 7773   | 36,49  | 82,8              |
| chr1 | 154561008 | 154561220 | ADAR    | NM_001111    | 15 | 15 | 10    | 123       | 547  | 24154  | 113,4  | 100               |
| chr1 | 154561860 | 154562051 | ADAR    | NM_001111    | 15 | 15 | 9     | 94        | 126  | 5351   | 27,87  | 84                |
| chr1 | 154562182 | 154562379 | ADAR    | NM_001111    | 15 | 15 | 8     | 172       | 738  | 30967  | 156,4  | 85,5              |
| chr1 | 154562695 | 154562987 | ADAR    | NM_001111    | 15 | 15 | 7     | 226       | 1205 | 52917  | 180,6  | 84,5              |
| chr1 | 154569314 | 154569846 | ADAR    | NM_001111    | 15 | 15 | 6,5   | 191.145   | 2416 | 109645 | 205,71 | 82.7,100.0        |
| chr1 | 154570298 | 154570519 | ADAR    | NM_001111    | 15 | 15 | 4     | 149       | 142  | 6599   | 29,73  | 100               |
| chr1 | 154570869 | 154571078 | ADAR    | NM_001111    | 15 | 15 | 3     | 184       | 1137 | 49263  | 234,59 | 100               |
| chr1 | 154573441 | 154575084 | ADAR    | NM_001111    | 15 | 15 | 2     | 1586      | 5715 | 272969 | 166,04 | 98,9              |
| chr1 | 156830703 | 156830986 | NTRK1   | NM_002529    | 17 | 17 | 1     | 212       | 6    | 255    | 0,9    | 100               |
| chr1 | 156834010 | 156834231 | NTRK1   | NM_002529    | 17 | 17 | 2     | 75        | 414  | 17494  | 78,8   | 100               |
| chr1 | 156834473 | 156834682 | NTRK1   | NM_002529    | 17 | 17 | 3     | 72        | 161  | 7183   | 34,2   | 100               |
| chr1 | 156836701 | 156836904 | NTRK1   | NM_002529    | 17 | 17 | 4     | 69        | 782  | 34859  | 170,88 | 100               |
| chr1 | 156837826 | 156838038 | NTRK1   | NM_002529    | 17 | 17 | 5     | 146       | 457  | 19012  | 89,26  | 97,9              |
| chr1 | 156838333 | 156838542 | NTRK1   | NM_002529    | 17 | 17 | 6     | 143       | 67   | 2890   | 13,76  | 74,8              |
| chr1 | 156841317 | 156841508 | NTRK1   | NM_002529    | 17 | 17 | 7     | 133       | 416  | 17583  | 91,58  | 70,7              |
| chr1 | 156843455 | 156843824 | NTRK1   | NM_002529    | 17 | 17 | 8     | 327       | 156  | 6822   | 18,44  | 90,8              |
| chr1 | 156844216 | 156844511 | NTRK1   | NM_002529    | 17 | 17 | 10    | 56        | 431  | 20271  | 68,48  | 100               |
| chr1 | 156844678 | 156844875 | NTRK1   | NM_002529    | 17 | 17 | 11    | 103       | 1381 | 59809  | 302,07 | 100               |
| chr1 | 156845266 | 156845454 | NTRK1   | NM_002529    | 17 | 17 | 12    | 147       | 134  | 5402   | 28,58  | 97,3              |
| chr1 | 156845866 | 156846066 | NTRK1   | NM_002529    | 17 | 17 | 13    | 131       | 123  | 5010   | 24,93  | 100               |

|      |           |           |        |           |    |    |             |                |      |        |        |                        |
|------|-----------|-----------|--------|-----------|----|----|-------------|----------------|------|--------|--------|------------------------|
| chr1 | 156846159 | 156846341 | NTRK1  | NM_002529 | 17 | 17 | 14          | 173            | 334  | 14152  | 77,33  | 86,7                   |
| chr1 | 156848959 | 156849218 | NTRK1  | NM_002529 | 17 | 17 | 15          | 241            | 650  | 28313  | 108,9  | 81,3                   |
| chr1 | 156849697 | 156849921 | NTRK1  | NM_002529 | 17 | 17 | 16          | 159            | 170  | 6944   | 30,86  | 82,4                   |
| chr1 | 156851296 | 156851475 | NTRK1  | NM_002529 | 17 | 17 | 17          | 186            | 83   | 3363   | 18,68  | 74,7                   |
| chr1 | 160090745 | 160091123 | ATP1A2 | NM_000702 | 23 | 23 | 2,3         | 105,60         | 2116 | 100440 | 265,01 | 53,3,100.0             |
| chr1 | 160092932 | 160093129 | ATP1A2 | NM_000702 | 23 | 23 | 4           | 204            | 483  | 20064  | 101,33 | 62,3                   |
| chr1 | 160093716 | 160093931 | ATP1A2 | NM_000702 | 23 | 23 | 5           | 114            | 518  | 22099  | 102,31 | 100                    |
| chr1 | 160094112 | 160094315 | ATP1A2 | NM_000702 | 23 | 23 | 6           | 135            | 250  | 11050  | 54,17  | 80,7                   |
| chr1 | 160094929 | 160095129 | ATP1A2 | NM_000702 | 23 | 23 | 7           | 118            | 301  | 13147  | 65,41  | 97,5                   |
| chr1 | 160097260 | 160097555 | ATP1A2 | NM_000702 | 23 | 23 | 8           | 269            | 716  | 32805  | 110,83 | 79,6                   |
| chr1 | 160098173 | 160099146 | ATP1A2 | NM_000702 | 23 | 23 | 9,10,11     | 199.110.135    | 2141 | 102085 | 104,81 | 100.0,100.0,67.4       |
| chr1 | 160099843 | 160100354 | ATP1A2 | NM_000702 | 23 | 23 | 12,13       | 190.176        | 1565 | 73549  | 143,65 | 100.0,81.2             |
| chr1 | 160104184 | 160104369 | ATP1A2 | NM_000702 | 23 | 23 | 14          | 137            | 179  | 7011   | 37,69  | 70,1                   |
| chr1 | 160104858 | 160105268 | ATP1A2 | NM_000702 | 23 | 23 | 15,16       | 151.169        | 734  | 34985  | 85,12  | 100.0,26.6             |
| chr1 | 160105680 | 160105853 | ATP1A2 | NM_000702 | 23 | 23 | 17          | 155            | 330  | 13562  | 77,94  | 67,1                   |
| chr1 | 160105923 | 160106138 | ATP1A2 | NM_000702 | 23 | 23 | 18          | 124            | 615  | 27532  | 127,46 | 82,3                   |
| chr1 | 160106383 | 160106589 | ATP1A2 | NM_000702 | 23 | 23 | 19          | 146            | 431  | 17114  | 82,68  | 84,2                   |
| chr1 | 160106620 | 160106826 | ATP1A2 | NM_000702 | 23 | 23 | 20          | 131            | 659  | 29155  | 140,85 | 100                    |
| chr1 | 160109424 | 160109778 | ATP1A2 | NM_000702 | 23 | 23 | 21,22       | 102,92         | 1239 | 57626  | 162,33 | 100.0,100.0            |
| chr1 | 161136619 | 161137281 | PPOX   | NM_000309 | 13 | 12 | 2,3,4       | 87.135.116     | 1374 | 66529  | 100,35 | 100.0,100.0,100.0      |
| chr1 | 161137807 | 161138025 | PPOX   | NM_000309 | 13 | 12 | 5           | 133            | 272  | 11308  | 51,63  | 83,5                   |
| chr1 | 161138118 | 161138345 | PPOX   | NM_000309 | 13 | 12 | 6           | 145            | 764  | 33582  | 147,29 | 85,5                   |
| chr1 | 161138834 | 161139037 | PPOX   | NM_000309 | 13 | 12 | 7           | 191            | 414  | 17520  | 85,88  | 73,3                   |
| chr1 | 161139328 | 161139522 | PPOX   | NM_000309 | 13 | 12 | 8           | 61             | 712  | 30241  | 155,08 | 100                    |
| chr1 | 161139612 | 161139824 | PPOX   | NM_000309 | 13 | 12 | 9           | 119            | 392  | 16733  | 78,56  | 100                    |
| chr1 | 161140209 | 161141049 | PPOX   | NM_000309 | 13 | 12 | 10,11,12,13 | 111,150,43,143 | 2548 | 121245 | 144,17 | 91.0,100.0,100.0,100.0 |
| chr1 | 161172018 | 161172209 | NDUFS2 | NM_004550 | 15 | 14 | 2           | 95             | 284  | 12262  | 63,86  | 35,8                   |
| chr1 | 161173107 | 161173316 | NDUFS2 | NM_004550 | 15 | 14 | 3           | 107            | 198  | 9051   | 43,1   | 84,1                   |
| chr1 | 161176125 | 161176331 | NDUFS2 | NM_004550 | 15 | 14 | 4           | 191            | 234  | 10297  | 49,74  | 70,7                   |
| chr1 | 161179008 | 161179472 | NDUFS2 | NM_004550 | 15 | 14 | 5,6         | 121.113        | 4421 | 213839 | 459,87 | 79.3,100.0             |
| chr1 | 161179694 | 161180199 | NDUFS2 | NM_004550 | 15 | 14 | 7,8,9       | 75,78,86       | 1971 | 95012  | 187,77 | 37.3,100.0,100.0       |
| chr1 | 161180410 | 161180607 | NDUFS2 | NM_004550 | 15 | 14 | 10          | 120            | 2456 | 102456 | 517,45 | 75,8                   |
| chr1 | 161182090 | 161182296 | NDUFS2 | NM_004550 | 15 | 14 | 11          | 130            | 314  | 13961  | 67,44  | 100                    |
| chr1 | 161183134 | 161183740 | NDUFS2 | NM_004550 | 15 | 14 | 12,13,14    | 96,84,58       | 1499 | 68418  | 112,71 | 100.0,100.0,100.0      |
| chr1 | 165697101 | 165697283 | TMCO1  | NM_019026 | 7  | 7  | 7           | 99             | 736  | 31177  | 170,37 | 24,2                   |
| chr1 | 165712375 | 165712569 | TMCO1  | NM_019026 | 7  | 7  | 6           | 145            | 203  | 8595   | 44,08  | 100                    |
| chr1 | 165721257 | 165721430 | TMCO1  | NM_019026 | 7  | 7  | 5           | 68             | 174  | 7599   | 43,67  | 100                    |
| chr1 | 165723351 | 165723566 | TMCO1  | NM_019026 | 7  | 7  | 4           | 47             | 208  | 9093   | 42,1   | 100                    |
| chr1 | 165728751 | 165728966 | TMCO1  | NM_019026 | 7  | 7  | 3           | 60             | 116  | 4589   | 21,25  | 100                    |
| chr1 | 165737382 | 165737567 | TMCO1  | NM_019026 | 7  | 7  | 2           | 78             | 323  | 13474  | 72,44  | 100                    |
| chr1 | 165737787 | 165738061 | TMCO1  | NM_019026 | 7  | 7  | 1           | 223            | 201  | 8782   | 31,93  | 64,1                   |
| chr1 | 173794238 | 173794524 | DARS2  | NM_018122 | 17 | 17 | 1           | 127            | 1634 | 73401  | 255,75 | 100                    |
| chr1 | 173795804 | 173796019 | DARS2  | NM_018122 | 17 | 17 | 2           | 100            | 201  | 8807   | 40,77  | 100                    |
| chr1 | 173797412 | 173797597 | DARS2  | NM_018122 | 17 | 17 | 3           | 67             | 296  | 12910  | 69,41  | 100                    |
| chr1 | 173799724 | 173799930 | DARS2  | NM_018122 | 17 | 17 | 4           | 102            | 474  | 20906  | 101    | 100                    |
| chr1 | 173800623 | 173800829 | DARS2  | NM_018122 | 17 | 17 | 5           | 96             | 339  | 14363  | 69,39  | 100                    |
| chr1 | 173802490 | 173802708 | DARS2  | NM_018122 | 17 | 17 | 6           | 124            | 263  | 11947  | 54,55  | 100                    |
| chr1 | 173803542 | 173803718 | DARS2  | NM_018122 | 17 | 17 | 7           | 47             | 139  | 6455   | 36,47  | 100                    |
| chr1 | 173806036 | 173806233 | DARS2  | NM_018122 | 17 | 17 | 8           | 107            | 420  | 17533  | 88,55  | 100                    |
| chr1 | 173807265 | 173807453 | DARS2  | NM_018122 | 17 | 17 | 9           | 70             | 225  | 9743   | 51,55  | 100                    |
| chr1 | 173808479 | 173808703 | DARS2  | NM_018122 | 17 | 17 | 10          | 180            | 286  | 12700  | 56,44  | 100                    |
| chr1 | 173809990 | 173810178 | DARS2  | NM_018122 | 17 | 17 | 11          | 108            | 328  | 14281  | 75,56  | 100                    |
| chr1 | 173814222 | 173814437 | DARS2  | NM_018122 | 17 | 17 | 12          | 63             | 83   | 3695   | 17,11  | 100                    |
| chr1 | 173819503 | 173819694 | DARS2  | NM_018122 | 17 | 17 | 13          | 153            | 109  | 4317   | 22,48  | 75,2                   |
| chr1 | 173822500 | 173822801 | DARS2  | NM_018122 | 17 | 17 | 14          | 219            | 1337 | 61900  | 204,97 | 94,1                   |
| chr1 | 173822902 | 173823087 | DARS2  | NM_018122 | 17 | 17 | 15          | 111            | 337  | 15137  | 81,38  | 100                    |
| chr1 | 173825735 | 173825953 | DARS2  | NM_018122 | 17 | 17 | 16          | 76             | 437  | 18758  | 85,65  | 100                    |

|      |           |           |          |              |    |    |          |             |       |        |        |                  |
|------|-----------|-----------|----------|--------------|----|----|----------|-------------|-------|--------|--------|------------------|
| chr1 | 173826610 | 173826958 | DARS2    | NM_018122    | 17 | 17 | 17       | 188         | 1530  | 72351  | 207,31 | 100              |
| chr1 | 197053290 | 197053659 | ASPM     | NM_018136    | 28 | 28 | 28       | 103         | 880   | 39193  | 105,93 | 100              |
| chr1 | 197055887 | 197056099 | ASPM     | NM_018136    | 28 | 28 | 27       | 170         | 138   | 5614   | 26,36  | 98,2             |
| chr1 | 197057309 | 197057577 | ASPM     | NM_018136    | 28 | 28 | 26       | 177         | 318   | 14453  | 53,73  | 100              |
| chr1 | 197059004 | 197059512 | ASPM     | NM_018136    | 28 | 28 | 25,24    | 155,193     | 1820  | 84637  | 166,28 | 100,0,96.9       |
| chr1 | 197059960 | 197060139 | ASPM     | NM_018136    | 28 | 28 | 23       | 192         | 400   | 17034  | 94,63  | 83,3             |
| chr1 | 197061026 | 197061196 | ASPM     | NM_018136    | 28 | 28 | 22       | 150         | 578   | 23498  | 137,42 | 100              |
| chr1 | 197062195 | 197062398 | ASPM     | NM_018136    | 28 | 28 | 21       | 210         | 92    | 3712   | 18,2   | 93,8             |
| chr1 | 197063176 | 197063346 | ASPM     | NM_018136    | 28 | 28 | 20       | 97          | 89    | 3200   | 18,71  | 100              |
| chr1 | 197065125 | 197065295 | ASPM     | NM_018136    | 28 | 28 | 19       | 167         | 510   | 20945  | 122,49 | 100              |
| chr1 | 197069572 | 197074308 | ASPM     | NM_018136    | 28 | 28 | 18       | 4755        | 11187 | 546876 | 115,45 | 99,6             |
| chr1 | 197086912 | 197087115 | ASPM     | NM_018136    | 28 | 28 | 17       | 195         | 271   | 11420  | 55,98  | 100              |
| chr1 | 197091098 | 197091772 | ASPM     | NM_018136    | 28 | 28 | 16,15,14 | 129,143,208 | 796   | 38693  | 57,32  | 58,9,100,0,100,0 |
| chr1 | 197093210 | 197093475 | ASPM     | NM_018136    | 28 | 28 | 13       | 222         | 428   | 20205  | 75,96  | 100              |
| chr1 | 197094010 | 197094370 | ASPM     | NM_018136    | 28 | 28 | 12,11    | 86,146      | 1169  | 56053  | 155,27 | 88,4,100,0       |
| chr1 | 197097604 | 197097807 | ASPM     | NM_018136    | 28 | 28 | 10       | 176         | 159   | 6594   | 32,32  | 100              |
| chr1 | 197098251 | 197098445 | ASPM     | NM_018136    | 28 | 28 | 9        | 131         | 44    | 1895   | 9,72   | 98,5             |
| chr1 | 197098982 | 197099191 | ASPM     | NM_018136    | 28 | 28 | 8        | 142         | 382   | 16699  | 79,52  | 100              |
| chr1 | 197101390 | 197101569 | ASPM     | NM_018136    | 28 | 28 | 7        | 68          | 735   | 31689  | 176,05 | 100              |
| chr1 | 197102477 | 197102733 | ASPM     | NM_018136    | 28 | 28 | 6        | 246         | 173   | 7767   | 30,22  | 100              |
| chr1 | 197104240 | 197104413 | ASPM     | NM_018136    | 28 | 28 | 5        | 147         | 336   | 12903  | 74,16  | 90,5             |
| chr1 | 197108824 | 197109009 | ASPM     | NM_018136    | 28 | 28 | 4        | 105         | 308   | 13430  | 72,2   | 100              |
| chr1 | 197111406 | 197113215 | ASPM     | NM_018136    | 28 | 28 | 3,2      | 1.480,144   | 4076  | 196985 | 108,83 | 100,0,89,6       |
| chr1 | 197115321 | 197115678 | ASPM     | NM_018136    | 28 | 28 | 1        | 297         | 195   | 8842   | 24,7   | 83,2             |
| chr1 | 210111520 | 210111726 | SYT14    | NM_001146261 | 10 | 10 | 1        | 27          | 23    | 1084   | 5,24   | 100              |
| chr1 | 210126052 | 210126231 | SYT14    | NM_001146261 | 10 | 10 | 2        | 48          | 83    | 3897   | 21,65  | 100              |
| chr1 | 210139122 | 210139242 | SYT14    | NM_001146261 | 10 | 10 | 3        | 121         | 10    | 197    | 1,63   | 4,1              |
| chr1 | 210187034 | 210187234 | SYT14    | NM_001146261 | 10 | 10 | 4        | 165         | 130   | 5643   | 28,07  | 66,1             |
| chr1 | 210194351 | 210194619 | SYT14    | NM_001146261 | 10 | 10 | 5        | 216         | 744   | 33017  | 122,74 | 100              |
| chr1 | 210267725 | 210268011 | SYT14    | NM_001146261 | 10 | 10 | 6        | 272         | 397   | 18257  | 63,61  | 78,7             |
| chr1 | 210273340 | 210273786 | SYT14    | NM_001146261 | 10 | 10 | 7        | 450         | 834   | 39514  | 88,4   | 95,6             |
| chr1 | 210329114 | 210329335 | SYT14    | NM_001146261 | 10 | 10 | 8        | 190         | 446   | 19625  | 88,4   | 74,7             |
| chr1 | 210332678 | 210332902 | SYT14    | NM_001146261 | 10 | 10 | 9        | 57          | 1006  | 45878  | 203,9  | 100              |
| chr1 | 210334142 | 210334478 | SYT14    | NM_001146261 | 10 | 10 | 10       | 314         | 878   | 38948  | 115,57 | 78,3             |
| chr1 | 220324537 | 220325036 | RAB3GAP2 | NM_012414    | 35 | 35 | 35,34    | 156,159     | 1265  | 58132  | 116,26 | 100,0,56,0       |
| chr1 | 220326491 | 220326792 | RAB3GAP2 | NM_012414    | 35 | 35 | 33       | 222         | 592   | 28928  | 95,79  | 100              |
| chr1 | 220327239 | 220327454 | RAB3GAP2 | NM_012414    | 35 | 35 | 32       | 90          | 289   | 11824  | 54,74  | 100              |
| chr1 | 220330607 | 220330899 | RAB3GAP2 | NM_012414    | 35 | 35 | 31       | 219         | 1463  | 65422  | 223,28 | 100              |
| chr1 | 220331098 | 220331304 | RAB3GAP2 | NM_012414    | 35 | 35 | 30       | 75          | 227   | 9828   | 47,48  | 100              |
| chr1 | 220332615 | 220332800 | RAB3GAP2 | NM_012414    | 35 | 35 | 29       | 36          | 249   | 10143  | 54,53  | 100              |
| chr1 | 220335513 | 220335689 | RAB3GAP2 | NM_012414    | 35 | 35 | 28       | 71          | 283   | 12194  | 68,89  | 100              |
| chr1 | 220338022 | 220338219 | RAB3GAP2 | NM_012414    | 35 | 35 | 27       | 67          | 21    | 844    | 4,26   | 100              |
| chr1 | 220340671 | 220341102 | RAB3GAP2 | NM_012414    | 35 | 35 | 26,25    | 107,174     | 1511  | 71948  | 166,55 | 66,4,100,0       |
| chr1 | 220344195 | 220344490 | RAB3GAP2 | NM_012414    | 35 | 35 | 24       | 229         | 635   | 28579  | 96,55  | 100              |
| chr1 | 220345153 | 220345338 | RAB3GAP2 | NM_012414    | 35 | 35 | 23       | 161         | 594   | 24179  | 129,99 | 67,1             |
| chr1 | 220345877 | 220346068 | RAB3GAP2 | NM_012414    | 35 | 35 | 22       | 106         | 416   | 17094  | 89,03  | 84,9             |
| chr1 | 220355505 | 220355729 | RAB3GAP2 | NM_012414    | 35 | 35 | 21       | 94          | 184   | 7617   | 33,85  | 100              |
| chr1 | 220356052 | 220356335 | RAB3GAP2 | NM_012414    | 35 | 35 | 20       | 218         | 538   | 25132  | 88,49  | 100              |
| chr1 | 220357356 | 220357529 | RAB3GAP2 | NM_012414    | 35 | 35 | 19       | 128         | 136   | 5573   | 32,03  | 100              |
| chr1 | 220358946 | 220359128 | RAB3GAP2 | NM_012414    | 35 | 35 | 18       | 91          | 544   | 23373  | 127,72 | 100              |
| chr1 | 220362910 | 220363110 | RAB3GAP2 | NM_012414    | 35 | 35 | 17       | 65          | 33    | 1174   | 5,84   | 100              |
| chr1 | 220363358 | 220363531 | RAB3GAP2 | NM_012414    | 35 | 35 | 16       | 83          | 670   | 28820  | 165,63 | 100              |
| chr1 | 220363615 | 220363845 | RAB3GAP2 | NM_012414    | 35 | 35 | 15       | 144         | 261   | 11063  | 47,89  | 88,2             |
| chr1 | 220364335 | 220364612 | RAB3GAP2 | NM_012414    | 35 | 35 | 14       | 217         | 334   | 15126  | 54,41  | 93,5             |
| chr1 | 220366566 | 220366751 | RAB3GAP2 | NM_012414    | 35 | 35 | 13       | 140         | 309   | 12379  | 66,55  | 100              |
| chr1 | 220368320 | 220368698 | RAB3GAP2 | NM_012414    | 35 | 35 | 12,11    | 90,80       | 462   | 21210  | 55,96  | 100,0,73,8       |
| chr1 | 220369544 | 220369735 | RAB3GAP2 | NM_012414    | 35 | 35 | 10       | 149         | 459   | 20552  | 107,04 | 96,6             |



|      |           |           |          |           |    |    |       |         |      |       |        |             |
|------|-----------|-----------|----------|-----------|----|----|-------|---------|------|-------|--------|-------------|
| chr1 | 220375605 | 220375793 | RAB3GAP2 | NM_012414 | 35 | 35 | 9     | 99      | 128  | 5590  | 29,58  | 100         |
| chr1 | 220379180 | 220379353 | RAB3GAP2 | NM_012414 | 35 | 35 | 8     | 100     | 175  | 8337  | 47,91  | 100         |
| chr1 | 220383625 | 220383804 | RAB3GAP2 | NM_012414 | 35 | 35 | 7     | 102     | 443  | 17797 | 98,87  | 73,5        |
| chr1 | 220384068 | 220384268 | RAB3GAP2 | NM_012414 | 35 | 35 | 6     | 76      | 566  | 24507 | 121,93 | 100         |
| chr1 | 220386154 | 220386336 | RAB3GAP2 | NM_012414 | 35 | 35 | 4     | 82      | 600  | 26074 | 142,48 | 100         |
| chr1 | 220387186 | 220387395 | RAB3GAP2 | NM_012414 | 35 | 35 | 3     | 124     | 118  | 5147  | 24,51  | 100         |
| chr1 | 220406054 | 220406248 | RAB3GAP2 | NM_012414 | 35 | 35 | 2     | 65      | 1085 | 47858 | 245,43 | 100         |
| chr1 | 220445593 | 220445814 | RAB3GAP2 | NM_012414 | 35 | 35 | 1     | 115     | 75   | 3076  | 13,86  | 75,7        |
| chr1 | 227149005 | 227149199 | ADCK3    | NM_020247 | 15 | 14 | 2     | 177     | 129  | 5550  | 28,46  | 63,8        |
| chr1 | 227152619 | 227153065 | ADCK3    | NM_020247 | 15 | 14 | 3     | 411     | 860  | 39228 | 87,76  | 88,8        |
| chr1 | 227153238 | 227153453 | ADCK3    | NM_020247 | 15 | 14 | 4     | 67      | 197  | 8222  | 38,06  | 100         |
| chr1 | 227165011 | 227165226 | ADCK3    | NM_020247 | 15 | 14 | 5     | 75      | 16   | 727   | 3,37   | 100         |
| chr1 | 227169628 | 227169843 | ADCK3    | NM_020247 | 15 | 14 | 6     | 123     | 225  | 9180  | 42,5   | 94,3        |
| chr1 | 227170331 | 227170679 | ADCK3    | NM_020247 | 15 | 14 | 7,8   | 86.141  | 488  | 22672 | 64,96  | 100.0,60.3  |
| chr1 | 227171208 | 227171559 | ADCK3    | NM_020247 | 15 | 14 | 9,10  | 82,94   | 461  | 22293 | 63,33  | 100.0,100.0 |
| chr1 | 227171822 | 227172025 | ADCK3    | NM_020247 | 15 | 14 | 11    | 142     | 292  | 11651 | 57,11  | 81          |
| chr1 | 227172184 | 227172360 | ADCK3    | NM_020247 | 15 | 14 | 12    | 108     | 679  | 27305 | 154,27 | 100         |
| chr1 | 227172521 | 227172703 | ADCK3    | NM_020247 | 15 | 14 | 13    | 66      | 432  | 19622 | 107,22 | 100         |
| chr1 | 227172933 | 227173118 | ADCK3    | NM_020247 | 15 | 14 | 14    | 87      | 197  | 8080  | 43,44  | 100         |
| chr1 | 227174212 | 227174498 | ADCK3    | NM_020247 | 15 | 14 | 15    | 285     | 485  | 22708 | 79,12  | 79,6        |
| chr1 | 228345480 | 228346877 | GJC2     | NM_020435 | 2  | 1  | 2     | 1320    | 559  | 25955 | 18,57  | 98,5        |
| chr1 | 231376705 | 231377157 | GNPAT    | NM_014236 | 16 | 16 | 1     | 78      | 629  | 28076 | 61,98  | 42,3        |
| chr1 | 231386748 | 231386942 | GNPAT    | NM_014236 | 16 | 16 | 2     | 183     | 188  | 7612  | 39,04  | 77,6        |
| chr1 | 231396180 | 231396365 | GNPAT    | NM_014236 | 16 | 16 | 3     | 177     | 155  | 7180  | 38,6   | 63,8        |
| chr1 | 231398394 | 231398609 | GNPAT    | NM_014236 | 16 | 16 | 4     | 130     | 698  | 30583 | 141,59 | 100         |
| chr1 | 231400987 | 231401202 | GNPAT    | NM_014236 | 16 | 16 | 5     | 128     | 338  | 14648 | 67,81  | 100         |
| chr1 | 231401404 | 231401595 | GNPAT    | NM_014236 | 16 | 16 | 6     | 76      | 333  | 14393 | 74,96  | 100         |
| chr1 | 231401805 | 231402245 | GNPAT    | NM_014236 | 16 | 16 | 7,8   | 152.131 | 1173 | 54767 | 124,19 | 70.4,100.0  |
| chr1 | 231403472 | 231403743 | GNPAT    | NM_014236 | 16 | 16 | 9     | 224     | 880  | 39369 | 144,74 | 79,5        |
| chr1 | 231406472 | 231406779 | GNPAT    | NM_014236 | 16 | 16 | 10    | 243     | 1748 | 81564 | 264,82 | 100         |
| chr1 | 231408018 | 231408227 | GNPAT    | NM_014236 | 16 | 16 | 11    | 80      | 123  | 5366  | 25,55  | 100         |
| chr1 | 231409703 | 231409900 | GNPAT    | NM_014236 | 16 | 16 | 12    | 141     | 293  | 12432 | 62,79  | 75,2        |
| chr1 | 231410905 | 231411170 | GNPAT    | NM_014236 | 16 | 16 | 13,14 | 100,94  | 1071 | 43321 | 162,86 | 100.0,21.3  |
| chr1 | 231411736 | 231411951 | GNPAT    | NM_014236 | 16 | 16 | 15    | 62      | 244  | 10407 | 48,18  | 100         |
| chr1 | 231413172 | 231413443 | GNPAT    | NM_014236 | 16 | 16 | 16    | 44      | 247  | 11572 | 42,54  | 100         |
| chr1 | 235543281 | 235543457 | TBCE     | NM_003193 | 17 | 16 | 2     | 100     | 368  | 17807 | 100,6  | 93          |
| chr1 | 235564726 | 235564944 | TBCE     | NM_003193 | 17 | 16 | 3     | 85      | 308  | 14075 | 64,27  | 100         |
| chr1 | 235577683 | 235577871 | TBCE     | NM_003193 | 17 | 16 | 4     | 186     | 367  | 14974 | 79,23  | 66,7        |
| chr1 | 235582716 | 235582925 | TBCE     | NM_003193 | 17 | 16 | 5     | 89      | 271  | 10610 | 50,52  | 100         |
| chr1 | 235590440 | 235590622 | TBCE     | NM_003193 | 17 | 16 | 6     | 100     | 825  | 32521 | 177,71 | 100         |
| chr1 | 235593984 | 235594157 | TBCE     | NM_003193 | 17 | 16 | 7     | 100     | 118  | 5399  | 31,03  | 100         |
| chr1 | 235597531 | 235597707 | TBCE     | NM_003193 | 17 | 16 | 8     | 77      | 175  | 7086  | 40,03  | 84,4        |
| chr1 | 235599046 | 235599237 | TBCE     | NM_003193 | 17 | 16 | 9     | 96      | 1003 | 40310 | 209,95 | 100         |
| chr1 | 235599683 | 235599936 | TBCE     | NM_003193 | 17 | 16 | 10,11 | 65,65   | 1356 | 63153 | 248,63 | 100.0,100.0 |
| chr1 | 235600552 | 235600749 | TBCE     | NM_003193 | 17 | 16 | 12    | 153     | 564  | 25257 | 127,56 | 73,9        |
| chr1 | 235602024 | 235602230 | TBCE     | NM_003193 | 17 | 16 | 13    | 154     | 660  | 27935 | 134,95 | 95,5        |
| chr1 | 235605002 | 235605202 | TBCE     | NM_003193 | 17 | 16 | 14    | 69      | 130  | 5334  | 26,54  | 100         |
| chr1 | 235606150 | 235606356 | TBCE     | NM_003193 | 17 | 16 | 15    | 60      | 545  | 23092 | 111,56 | 100         |
| chr1 | 235611555 | 235611734 | TBCE     | NM_003193 | 17 | 16 | 16    | 92      | 596  | 26402 | 146,68 | 77,2        |
| chr1 | 235611985 | 235612247 | TBCE     | NM_003193 | 17 | 16 | 17    | 93      | 498  | 21960 | 83,5   | 100         |
| chr1 | 236958574 | 236959011 | MTR      | NM_000254 | 33 | 33 | 1     | 34      | 450  | 18680 | 42,65  | 23,5        |
| chr1 | 236966809 | 236966994 | MTR      | NM_000254 | 33 | 33 | 2     | 215     | 164  | 7031  | 37,8   | 62,3        |
| chr1 | 236969388 | 236969585 | MTR      | NM_000254 | 33 | 33 | 3     | 90      | 277  | 12437 | 62,81  | 100         |
| chr1 | 236972013 | 236972204 | MTR      | NM_000254 | 33 | 33 | 4     | 70      | 462  | 19092 | 99,44  | 87,1        |
| chr1 | 236973736 | 236973960 | MTR      | NM_000254 | 33 | 33 | 5     | 93      | 464  | 20221 | 89,87  | 100         |
| chr1 | 236976020 | 236976220 | MTR      | NM_000254 | 33 | 33 | 6     | 107     | 206  | 9324  | 46,39  | 100         |
| chr1 | 236978800 | 236978997 | MTR      | NM_000254 | 33 | 33 | 7     | 60      | 657  | 26571 | 134,2  | 100         |

|      |           |           |       |              |    |    |    |      |      |        |        |      |
|------|-----------|-----------|-------|--------------|----|----|----|------|------|--------|--------|------|
| chr1 | 236979695 | 236979880 | MTR   | NM_000254    | 33 | 33 | 8  | 95   | 246  | 10701  | 57,53  | 100  |
| chr1 | 236987425 | 236987631 | MTR   | NM_000254    | 33 | 33 | 9  | 101  | 200  | 8684   | 41,95  | 94,1 |
| chr1 | 236988583 | 236988771 | MTR   | NM_000254    | 33 | 33 | 10 | 62   | 197  | 8437   | 44,64  | 100  |
| chr1 | 236990062 | 236990247 | MTR   | NM_000254    | 33 | 33 | 11 | 68   | 924  | 39882  | 214,42 | 100  |
| chr1 | 236992452 | 236992667 | MTR   | NM_000254    | 33 | 33 | 12 | 80   | 663  | 28329  | 131,15 | 100  |
| chr1 | 236995197 | 236995394 | MTR   | NM_000254    | 33 | 33 | 13 | 113  | 451  | 18864  | 95,27  | 100  |
| chr1 | 236998891 | 236999076 | MTR   | NM_000254    | 33 | 33 | 14 | 141  | 205  | 8439   | 45,37  | 68,8 |
| chr1 | 237001646 | 237001858 | MTR   | NM_000254    | 33 | 33 | 15 | 186  | 549  | 24209  | 113,66 | 78   |
| chr1 | 237013678 | 237013857 | MTR   | NM_000254    | 33 | 33 | 16 | 180  | 780  | 33498  | 186,1  | 81,1 |
| chr1 | 237015763 | 237015957 | MTR   | NM_000254    | 33 | 33 | 17 | 117  | 317  | 13287  | 68,14  | 100  |
| chr1 | 237016157 | 237016348 | MTR   | NM_000254    | 33 | 33 | 18 | 141  | 380  | 16079  | 83,74  | 71,6 |
| chr1 | 237023059 | 237023232 | MTR   | NM_000254    | 33 | 33 | 19 | 90   | 155  | 6491   | 37,3   | 100  |
| chr1 | 237024445 | 237024627 | MTR   | NM_000254    | 33 | 33 | 20 | 153  | 427  | 17689  | 96,66  | 86,9 |
| chr1 | 237025423 | 237025623 | MTR   | NM_000254    | 33 | 33 | 21 | 108  | 244  | 10732  | 53,39  | 81,5 |
| chr1 | 237026778 | 237026960 | MTR   | NM_000254    | 33 | 33 | 22 | 101  | 691  | 27882  | 152,36 | 76,2 |
| chr1 | 237037021 | 237037194 | MTR   | NM_000254    | 33 | 33 | 23 | 68   | 332  | 12896  | 74,11  | 100  |
| chr1 | 237038018 | 237038221 | MTR   | NM_000254    | 33 | 33 | 24 | 121  | 130  | 5824   | 28,55  | 100  |
| chr1 | 237043947 | 237044120 | MTR   | NM_000254    | 33 | 33 | 25 | 82   | 357  | 16079  | 92,41  | 80,5 |
| chr1 | 237048327 | 237048536 | MTR   | NM_000254    | 33 | 33 | 26 | 99   | 152  | 6755   | 32,17  | 100  |
| chr1 | 237049502 | 237049687 | MTR   | NM_000254    | 33 | 33 | 27 | 76   | 99   | 4403   | 23,67  | 100  |
| chr1 | 237052509 | 237052733 | MTR   | NM_000254    | 33 | 33 | 28 | 156  | 656  | 29744  | 132,2  | 82,1 |
| chr1 | 237054370 | 237054570 | MTR   | NM_000254    | 33 | 33 | 29 | 197  | 586  | 25314  | 125,94 | 70,1 |
| chr1 | 237057632 | 237057832 | MTR   | NM_000254    | 33 | 33 | 30 | 201  | 807  | 33323  | 165,79 | 87,6 |
| chr1 | 237058716 | 237058928 | MTR   | NM_000254    | 33 | 33 | 31 | 193  | 148  | 6445   | 30,26  | 69,9 |
| chr1 | 237060306 | 237060476 | MTR   | NM_000254    | 33 | 33 | 32 | 113  | 378  | 15863  | 92,77  | 100  |
| chr1 | 237060845 | 237061060 | MTR   | NM_000254    | 33 | 33 | 33 | 87   | 257  | 9483   | 43,9   | 100  |
| chr1 | 241660995 | 241661192 | FH    | NM_000143    | 10 | 10 | 10 | 143  | 104  | 4369   | 22,07  | 45,5 |
| chr1 | 241663638 | 241663838 | FH    | NM_000143    | 10 | 10 | 9  | 154  | 513  | 19869  | 98,85  | 66,2 |
| chr1 | 241665760 | 241665957 | FH    | NM_000143    | 10 | 10 | 8  | 128  | 156  | 6622   | 33,44  | 86,7 |
| chr1 | 241667268 | 241667468 | FH    | NM_000143    | 10 | 10 | 7  | 204  | 395  | 17941  | 89,26  | 62,3 |
| chr1 | 241669264 | 241669452 | FH    | NM_000143    | 10 | 10 | 6  | 166  | 571  | 24135  | 127,7  | 90,4 |
| chr1 | 241671881 | 241672090 | FH    | NM_000143    | 10 | 10 | 5  | 183  | 165  | 6413   | 30,54  | 100  |
| chr1 | 241675212 | 241675418 | FH    | NM_000143    | 10 | 10 | 4  | 177  | 853  | 37534  | 181,32 | 85,9 |
| chr1 | 241676836 | 241677030 | FH    | NM_000143    | 10 | 10 | 3  | 111  | 555  | 23681  | 121,44 | 100  |
| chr1 | 241680412 | 241680630 | FH    | NM_000143    | 10 | 10 | 2  | 135  | 354  | 15781  | 72,06  | 100  |
| chr1 | 241682934 | 241683137 | FH    | NM_000143    | 10 | 10 | 1  | 132  | 40   | 1411   | 6,92   | 67,4 |
| chr1 | 243662976 | 243663232 | AKT3  | NM_181690    | 14 | 13 | 13 | 44   | 687  | 32368  | 125,95 | 100  |
| chr1 | 243675606 | 243675809 | AKT3  | NM_181690    | 14 | 13 | 12 | 103  | 10   | 469    | 2,3    | 100  |
| chr1 | 243708764 | 243708955 | AKT3  | NM_181690    | 14 | 13 | 11 | 88   | 278  | 12929  | 67,34  | 100  |
| chr1 | 243716100 | 243716285 | AKT3  | NM_181690    | 14 | 13 | 10 | 215  | 580  | 25161  | 135,27 | 67,9 |
| chr1 | 243726949 | 243727164 | AKT3  | NM_181690    | 14 | 13 | 9  | 129  | 180  | 7566   | 35,03  | 100  |
| chr1 | 243736203 | 243736433 | AKT3  | NM_181690    | 14 | 13 | 8  | 123  | 214  | 9455   | 40,93  | 100  |
| chr1 | 243776861 | 243777046 | AKT3  | NM_181690    | 14 | 13 | 7  | 69   | 624  | 26530  | 142,63 | 100  |
| chr1 | 243778366 | 243778560 | AKT3  | NM_181690    | 14 | 13 | 6  | 66   | 134  | 5617   | 28,81  | 100  |
| chr1 | 243800848 | 243801048 | AKT3  | NM_181690    | 14 | 13 | 5  | 132  | 358  | 16338  | 81,28  | 100  |
| chr1 | 243809187 | 243809381 | AKT3  | NM_181690    | 14 | 13 | 4  | 145  | 139  | 5736   | 29,42  | 100  |
| chr1 | 243828011 | 243828190 | AKT3  | NM_181690    | 14 | 13 | 3  | 112  | 534  | 23206  | 128,92 | 100  |
| chr1 | 243858885 | 243859079 | AKT3  | NM_181690    | 14 | 13 | 2  | 126  | 356  | 15051  | 77,18  | 100  |
| chr1 | 244006332 | 244006541 | AKT3  | NM_181690    | 14 | 13 | 1  | 46   | 1616 | 69394  | 330,45 | 100  |
| chr1 | 247582071 | 247582360 | NLRP3 | NM_001079821 | 11 | 9  | 3  | 283  | 337  | 15140  | 52,21  | 93,3 |
| chr1 | 247586458 | 247586655 | NLRP3 | NM_001079821 | 11 | 9  | 4  | 120  | 301  | 12909  | 65,2   | 100  |
| chr1 | 247587095 | 247588910 | NLRP3 | NM_001079821 | 11 | 9  | 5  | 1753 | 5328 | 256739 | 141,38 | 100  |
| chr1 | 247592829 | 247593047 | NLRP3 | NM_001079821 | 11 | 9  | 6  | 171  | 607  | 27378  | 125,01 | 94,2 |
| chr1 | 247597425 | 247597607 | NLRP3 | NM_001079821 | 11 | 9  | 7  | 171  | 496  | 21664  | 118,38 | 88,3 |
| chr1 | 247599292 | 247599498 | NLRP3 | NM_001079821 | 11 | 9  | 8  | 171  | 241  | 10325  | 49,88  | 88,3 |
| chr1 | 247607264 | 247607473 | NLRP3 | NM_001079821 | 11 | 9  | 9  | 171  | 1200 | 51124  | 243,45 | 100  |
| chr1 | 247607865 | 247608062 | NLRP3 | NM_001079821 | 11 | 9  | 10 | 171  | 330  | 13895  | 70,18  | 64,3 |

|      |           |           |         |              |    |    |       |         |      |       |        |            |
|------|-----------|-----------|---------|--------------|----|----|-------|---------|------|-------|--------|------------|
| chr1 | 247611605 | 247611885 | NLRP3   | NM_001079821 | 11 | 9  | 11    | 100     | 278  | 13081 | 46,55  | 100        |
| chr2 | 3651171   | 3651350   | COLEC11 | NM_001255985 | 8  | 7  | 2     | 16      | 240  | 10540 | 58,56  | 100        |
| chr2 | 3651862   | 3652059   | COLEC11 | NM_001255985 | 8  | 7  | 3     | 156     | 520  | 23476 | 118,57 | 99,4       |
| chr2 | 3660806   | 3660991   | COLEC11 | NM_001255985 | 8  | 7  | 4     | 72      | 133  | 6271  | 33,72  | 100        |
| chr2 | 3685103   | 3685309   | COLEC11 | NM_001255985 | 8  | 7  | 5     | 72      | 547  | 23286 | 112,49 | 100        |
| chr2 | 3687773   | 3687964   | COLEC11 | NM_001255985 | 8  | 7  | 6     | 54      | 88   | 3642  | 18,97  | 100        |
| chr2 | 3690936   | 3691139   | COLEC11 | NM_001255985 | 8  | 7  | 7     | 96      | 188  | 8390  | 41,13  | 100        |
| chr2 | 3691346   | 3691789   | COLEC11 | NM_001255985 | 8  | 7  | 8     | 392     | 471  | 22428 | 50,51  | 92,6       |
| chr2 | 16080626  | 16080835  | MYCN    | NM_005378    | 3  | 2  | 1     | 183     | 47   | 2183  | 10,4   | 83,6       |
| chr2 | 16082108  | 16083022  | MYCN    | NM_005378    | 3  | 2  | 2     | 790     | 711  | 33682 | 36,81  | 100        |
| chr2 | 16085575  | 16086276  | MYCN    | NM_005378    | 3  | 2  | 3     | 605     | 1831 | 87401 | 124,5  | 100        |
| chr2 | 39212854  | 39213469  | SOS1    | NM_005633    | 23 | 23 | 23    | 492     | 563  | 26970 | 43,78  | 100        |
| chr2 | 39214557  | 39214775  | SOS1    | NM_005633    | 23 | 23 | 22    | 119     | 77   | 3351  | 15,3   | 100        |
| chr2 | 39216278  | 39216469  | SOS1    | NM_005633    | 23 | 23 | 21    | 45      | 498  | 22370 | 116,51 | 100        |
| chr2 | 39222210  | 39222466  | SOS1    | NM_005633    | 23 | 23 | 20    | 265     | 336  | 15293 | 59,51  | 76,6       |
| chr2 | 39223987  | 39224181  | SOS1    | NM_005633    | 23 | 23 | 19    | 117     | 576  | 24303 | 124,63 | 100        |
| chr2 | 39224358  | 39224543  | SOS1    | NM_005633    | 23 | 23 | 18    | 173     | 387  | 16995 | 91,37  | 86,7       |
| chr2 | 39233559  | 39233768  | SOS1    | NM_005633    | 23 | 23 | 17    | 118     | 84   | 3722  | 17,72  | 94,9       |
| chr2 | 39234128  | 39234310  | SOS1    | NM_005633    | 23 | 23 | 16    | 163     | 653  | 27326 | 149,32 | 85,3       |
| chr2 | 39237663  | 39237845  | SOS1    | NM_005633    | 23 | 23 | 15    | 120     | 248  | 11081 | 60,55  | 100        |
| chr2 | 39239240  | 39239502  | SOS1    | NM_005633    | 23 | 23 | 14    | 223     | 600  | 27738 | 105,47 | 100        |
| chr2 | 39240567  | 39240743  | SOS1    | NM_005633    | 23 | 23 | 13    | 104     | 332  | 13485 | 76,19  | 100        |
| chr2 | 39240908  | 39241111  | SOS1    | NM_005633    | 23 | 23 | 12    | 123     | 273  | 11966 | 58,66  | 84,6       |
| chr2 | 39241831  | 39242016  | SOS1    | NM_005633    | 23 | 23 | 11    | 82      | 94   | 3616  | 19,44  | 100        |
| chr2 | 39249643  | 39250385  | SOS1    | NM_005633    | 23 | 23 | 10    | 656     | 1995 | 93256 | 125,51 | 100        |
| chr2 | 39251054  | 39251263  | SOS1    | NM_005633    | 23 | 23 | 9     | 128     | 75   | 2813  | 13,4   | 88,3       |
| chr2 | 39262371  | 39262663  | SOS1    | NM_005633    | 23 | 23 | 8,7   | 99.111  | 175  | 8106  | 27,67  | 81.8,100.0 |
| chr2 | 39278235  | 39278411  | SOS1    | NM_005633    | 23 | 23 | 6     | 144     | 132  | 5553  | 31,37  | 88,2       |
| chr2 | 39281789  | 39281980  | SOS1    | NM_005633    | 23 | 23 | 5     | 210     | 157  | 6472  | 33,71  | 83,8       |
| chr2 | 39283821  | 39284012  | SOS1    | NM_005633    | 23 | 23 | 4     | 165     | 668  | 30153 | 157,05 | 100        |
| chr2 | 39285776  | 39285973  | SOS1    | NM_005633    | 23 | 23 | 3     | 132     | 115  | 4938  | 24,94  | 100        |
| chr2 | 39294683  | 39294886  | SOS1    | NM_005633    | 23 | 23 | 2     | 126     | 286  | 12443 | 61     | 93,7       |
| chr2 | 39347422  | 39347592  | SOS1    | NM_005633    | 23 | 23 | 1     | 87      | 10   | 352   | 2,06   | 100        |
| chr2 | 44115558  | 44115776  | LRPPRC  | NM_133259    | 38 | 38 | 38    | 57      | 404  | 17302 | 79     | 66,7       |
| chr2 | 44116807  | 44117010  | LRPPRC  | NM_133259    | 38 | 38 | 37    | 143     | 196  | 8400  | 41,18  | 96,5       |
| chr2 | 44121661  | 44121849  | LRPPRC  | NM_133259    | 38 | 38 | 36    | 85      | 168  | 7610  | 40,26  | 100        |
| chr2 | 44123658  | 44123849  | LRPPRC  | NM_133259    | 38 | 38 | 35    | 75      | 681  | 29194 | 152,05 | 100        |
| chr2 | 44126294  | 44126734  | LRPPRC  | NM_133259    | 38 | 38 | 34,33 | 116.140 | 1105 | 51988 | 117,89 | 100.0,92.9 |
| chr2 | 44128400  | 44128600  | LRPPRC  | NM_133259    | 38 | 38 | 32    | 205     | 380  | 15758 | 78,4   | 69,3       |
| chr2 | 44132702  | 44132899  | LRPPRC  | NM_133259    | 38 | 38 | 31    | 89      | 647  | 28370 | 143,28 | 77,5       |
| chr2 | 44139578  | 44139748  | LRPPRC  | NM_133259    | 38 | 38 | 30    | 127     | 143  | 6100  | 35,67  | 94,5       |
| chr2 | 44145155  | 44145512  | LRPPRC  | NM_133259    | 38 | 38 | 29,28 | 109.143 | 1010 | 45929 | 128,29 | 100.0,82.5 |
| chr2 | 44152090  | 44152275  | LRPPRC  | NM_133259    | 38 | 38 | 27    | 91      | 872  | 37563 | 201,95 | 76,9       |
| chr2 | 44152959  | 44153162  | LRPPRC  | NM_133259    | 38 | 38 | 26    | 69      | 536  | 24309 | 119,16 | 100        |
| chr2 | 44161293  | 44161484  | LRPPRC  | NM_133259    | 38 | 38 | 25    | 107     | 221  | 9730  | 50,68  | 100        |
| chr2 | 44161797  | 44162006  | LRPPRC  | NM_133259    | 38 | 38 | 24    | 125     | 210  | 8829  | 42,04  | 91,2       |
| chr2 | 44170814  | 44171005  | LRPPRC  | NM_133259    | 38 | 38 | 23    | 208     | 694  | 28714 | 149,55 | 86,5       |
| chr2 | 44172380  | 44172592  | LRPPRC  | NM_133259    | 38 | 38 | 22    | 86      | 818  | 37662 | 176,82 | 100        |
| chr2 | 44173165  | 44173341  | LRPPRC  | NM_133259    | 38 | 38 | 21    | 131     | 872  | 37280 | 210,62 | 68,7       |
| chr2 | 44174394  | 44174582  | LRPPRC  | NM_133259    | 38 | 38 | 20    | 114     | 65   | 2930  | 15,5   | 100        |
| chr2 | 44174722  | 44174919  | LRPPRC  | NM_133259    | 38 | 38 | 19    | 45      | 43   | 2010  | 10,15  | 100        |
| chr2 | 44175259  | 44175462  | LRPPRC  | NM_133259    | 38 | 38 | 18    | 78      | 237  | 8917  | 43,71  | 100        |
| chr2 | 44175476  | 44175685  | LRPPRC  | NM_133259    | 38 | 38 | 17    | 107     | 581  | 24761 | 117,91 | 100        |
| chr2 | 44176678  | 44176869  | LRPPRC  | NM_133259    | 38 | 38 | 16    | 58      | 652  | 28333 | 147,57 | 100        |
| chr2 | 44177640  | 44177822  | LRPPRC  | NM_133259    | 38 | 38 | 15    | 28      | 159  | 6999  | 38,25  | 100        |
| chr2 | 44184441  | 44184626  | LRPPRC  | NM_133259    | 38 | 38 | 14    | 67      | 384  | 16035 | 86,21  | 100        |
| chr2 | 44187596  | 44187811  | LRPPRC  | NM_133259    | 38 | 38 | 13    | 94      | 741  | 31625 | 146,41 | 100        |

|      |           |           |         |              |    |    |       |         |      |        |        |            |
|------|-----------|-----------|---------|--------------|----|----|-------|---------|------|--------|--------|------------|
| chr2 | 44190652  | 44190837  | LRPPRC  | NM_133259    | 38 | 38 | 12    | 119     | 392  | 17070  | 91,77  | 93,3       |
| chr2 | 44200719  | 44201014  | LRPPRC  | NM_133259    | 38 | 38 | 11,10 | 108.106 | 1002 | 45487  | 153,67 | 100.0,76.4 |
| chr2 | 44201240  | 44201437  | LRPPRC  | NM_133259    | 38 | 38 | 9     | 146     | 490  | 21378  | 107,97 | 100        |
| chr2 | 44201766  | 44201942  | LRPPRC  | NM_133259    | 38 | 38 | 8     | 145     | 420  | 17544  | 99,12  | 91         |
| chr2 | 44202192  | 44202398  | LRPPRC  | NM_133259    | 38 | 38 | 7     | 127     | 358  | 15108  | 72,99  | 100        |
| chr2 | 44203182  | 44203409  | LRPPRC  | NM_133259    | 38 | 38 | 6     | 87      | 509  | 22656  | 99,37  | 100        |
| chr2 | 44204091  | 44204374  | LRPPRC  | NM_133259    | 38 | 38 | 5,4   | 59.122  | 228  | 9540   | 33,59  | 100.0,66.4 |
| chr2 | 44206952  | 44207149  | LRPPRC  | NM_133259    | 38 | 38 | 3     | 123     | 353  | 15259  | 77,07  | 100        |
| chr2 | 44209326  | 44209520  | LRPPRC  | NM_133259    | 38 | 38 | 2     | 197     | 192  | 8557   | 43,88  | 73,1       |
| chr2 | 44222957  | 44223160  | LRPPRC  | NM_133259    | 38 | 38 | 1     | 149     | 2    | 93     | 0,46   | 87,2       |
| chr2 | 45169178  | 45170098  | SIX3    | NM_005413    | 2  | 2  | 1     | 806     | 1963 | 88839  | 96,46  | 100        |
| chr2 | 45171752  | 45171928  | SIX3    | NM_005413    | 2  | 2  | 2     | 193     | 191  | 7301   | 41,25  | 76,7       |
| chr2 | 50148987  | 50149356  | NRXN1   | NM_001135659 | 24 | 23 | 24    | 308     | 516  | 23628  | 63,86  | 89,3       |
| chr2 | 50170770  | 50171000  | NRXN1   | NM_001135659 | 24 | 23 | 23    | 88      | 105  | 4510   | 19,52  | 100        |
| chr2 | 50280355  | 50280715  | NRXN1   | NM_001135659 | 24 | 23 | 22    | 320     | 2656 | 122174 | 338,43 | 95,9       |
| chr2 | 50282066  | 50282272  | NRXN1   | NM_001135659 | 24 | 23 | 21    | 90      | 129  | 5560   | 26,86  | 100        |
| chr2 | 50318509  | 50318697  | NRXN1   | NM_001135659 | 24 | 23 | 20    | 172     | 1253 | 55541  | 293,87 | 72,1       |
| chr2 | 50463977  | 50464174  | NRXN1   | NM_001135659 | 24 | 23 | 19    | 182     | 288  | 12278  | 62,01  | 72,5       |
| chr2 | 50692475  | 50692678  | NRXN1   | NM_001135659 | 24 | 23 | 18    | 120     | 1144 | 48482  | 237,66 | 82,5       |
| chr2 | 50699394  | 50699603  | NRXN1   | NM_001135659 | 24 | 23 | 17    | 174     | 388  | 17366  | 82,7   | 96,6       |
| chr2 | 50723070  | 50723261  | NRXN1   | NM_001135659 | 24 | 23 | 16    | 191     | 322  | 14315  | 74,56  | 85,9       |
| chr2 | 50724446  | 50724883  | NRXN1   | NM_001135659 | 24 | 23 | 15    | 382     | 1141 | 54697  | 124,88 | 100        |
| chr2 | 50733557  | 50733766  | NRXN1   | NM_001135659 | 24 | 23 | 14    | 123     | 870  | 37630  | 179,19 | 100        |
| chr2 | 50755750  | 50755941  | NRXN1   | NM_001135659 | 24 | 23 | 13    | 27      | 320  | 13271  | 69,12  | 100        |
| chr2 | 50758422  | 50758625  | NRXN1   | NM_001135659 | 24 | 23 | 12    | 204     | 479  | 20961  | 102,75 | 72,1       |
| chr2 | 50765331  | 50765786  | NRXN1   | NM_001135659 | 24 | 23 | 11    | 384     | 2127 | 99676  | 218,59 | 100        |
| chr2 | 50779792  | 50780214  | NRXN1   | NM_001135659 | 24 | 23 | 10    | 439     | 1160 | 53585  | 126,68 | 84,7       |
| chr2 | 50847079  | 50847273  | NRXN1   | NM_001135659 | 24 | 23 | 9     | 162     | 301  | 13210  | 67,74  | 70,4       |
| chr2 | 50848336  | 50848518  | NRXN1   | NM_001135659 | 24 | 23 | 8     | 45      | 49   | 1925   | 10,52  | 100        |
| chr2 | 50850380  | 50850749  | NRXN1   | NM_001135659 | 24 | 23 | 7     | 304     | 1798 | 83674  | 226,15 | 98         |
| chr2 | 50858172  | 50858366  | NRXN1   | NM_001135659 | 24 | 23 | 6     | 7       | 160  | 6376   | 32,7   | 100        |
| chr2 | 51149675  | 51149863  | NRXN1   | NM_001135659 | 24 | 23 | 5     | 33      | 418  | 18980  | 100,42 | 100        |
| chr2 | 51152998  | 51153171  | NRXN1   | NM_001135659 | 24 | 23 | 4     | 18      | 329  | 14334  | 82,38  | 100        |
| chr2 | 51253397  | 51253600  | NRXN1   | NM_001135659 | 24 | 23 | 3     | 99      | 1528 | 68236  | 334,49 | 92,9       |
| chr2 | 51254640  | 51255510  | NRXN1   | NM_001135659 | 24 | 23 | 2     | 772     | 256  | 11754  | 13,49  | 100        |
| chr2 | 61244747  | 61244947  | PEX13   | NM_002618    | 4  | 4  | 1     | 92      | 156  | 6387   | 31,78  | 57,6       |
| chr2 | 61258515  | 61259222  | PEX13   | NM_002618    | 4  | 4  | 2     | 695     | 2106 | 100864 | 142,46 | 96,3       |
| chr2 | 61272835  | 61273011  | PEX13   | NM_002618    | 4  | 4  | 3     | 126     | 165  | 6127   | 34,62  | 100        |
| chr2 | 61275537  | 61275974  | PEX13   | NM_002618    | 4  | 4  | 4     | 299     | 860  | 41436  | 94,6   | 100        |
| chr2 | 88857165  | 88857528  | EIF2AK3 | NM_004836    | 17 | 17 | 17    | 201     | 754  | 35892  | 98,6   | 100        |
| chr2 | 88858308  | 88858490  | EIF2AK3 | NM_004836    | 17 | 17 | 16    | 63      | 141  | 6156   | 33,64  | 88,9       |
| chr2 | 88861742  | 88861921  | EIF2AK3 | NM_004836    | 17 | 17 | 15    | 102     | 79   | 2971   | 16,51  | 100        |
| chr2 | 88870450  | 88870626  | EIF2AK3 | NM_004836    | 17 | 17 | 14    | 168     | 462  | 19838  | 112,08 | 65,5       |
| chr2 | 88874207  | 88875059  | EIF2AK3 | NM_004836    | 17 | 17 | 13    | 781     | 2584 | 124528 | 145,99 | 97,1       |
| chr2 | 88876019  | 88876207  | EIF2AK3 | NM_004836    | 17 | 17 | 12    | 150     | 451  | 20700  | 109,52 | 90,7       |
| chr2 | 88878960  | 88879163  | EIF2AK3 | NM_004836    | 17 | 17 | 11    | 123     | 406  | 15467  | 75,82  | 100        |
| chr2 | 88882891  | 88883100  | EIF2AK3 | NM_004836    | 17 | 17 | 10    | 113     | 117  | 4969   | 23,66  | 100        |
| chr2 | 88885322  | 88885593  | EIF2AK3 | NM_004836    | 17 | 17 | 9     | 221     | 1027 | 45470  | 167,17 | 100        |
| chr2 | 88887499  | 88887684  | EIF2AK3 | NM_004836    | 17 | 17 | 8     | 123     | 127  | 5786   | 31,11  | 100        |
| chr2 | 88888290  | 88888466  | EIF2AK3 | NM_004836    | 17 | 17 | 7     | 141     | 551  | 23798  | 134,45 | 92,2       |
| chr2 | 88889914  | 88890102  | EIF2AK3 | NM_004836    | 17 | 17 | 6     | 163     | 581  | 23928  | 126,6  | 87,1       |
| chr2 | 88890306  | 88890592  | EIF2AK3 | NM_004836    | 17 | 17 | 5     | 235     | 927  | 42749  | 148,95 | 100        |
| chr2 | 88892747  | 88892959  | EIF2AK3 | NM_004836    | 17 | 17 | 4     | 134     | 505  | 21590  | 101,36 | 100        |
| chr2 | 88895019  | 88895459  | EIF2AK3 | NM_004836    | 17 | 17 | 3     | 195     | 443  | 20059  | 45,49  | 83,6       |
| chr2 | 88913185  | 88913385  | EIF2AK3 | NM_004836    | 17 | 17 | 2     | 130     | 517  | 24024  | 119,52 | 100        |
| chr2 | 88926533  | 88926896  | EIF2AK3 | NM_004836    | 17 | 17 | 1     | 308     | 8    | 266    | 0,73   | 84,4       |
| chr2 | 110881272 | 110881721 | NPHP1   | NM_000272    | 20 | 20 | 20    | 273     | 701  | 33619  | 74,71  | 100        |

|      |           |           |          |              |    |    |     |         |      |        |        |             |
|------|-----------|-----------|----------|--------------|----|----|-----|---------|------|--------|--------|-------------|
| chr2 | 110882773 | 110883272 | NPHP1    | NM_000272    | 20 | 20 | 19  | 45      | 1961 | 91153  | 182,31 | 100         |
| chr2 | 110886657 | 110886884 | NPHP1    | NM_000272    | 20 | 20 | 18  | 74      | 427  | 18989  | 83,29  | 100         |
| chr2 | 110889154 | 110889345 | NPHP1    | NM_000272    | 20 | 20 | 17  | 113     | 74   | 3276   | 17,06  | 79,6        |
| chr2 | 110901017 | 110901205 | NPHP1    | NM_000272    | 20 | 20 | 16  | 100     | 384  | 15826  | 83,74  | 87          |
| chr2 | 110902004 | 110902207 | NPHP1    | NM_000272    | 20 | 20 | 15  | 77      | 327  | 13360  | 65,49  | 100         |
| chr2 | 110904285 | 110904455 | NPHP1    | NM_000272    | 20 | 20 | 14  | 83      | 340  | 13912  | 81,36  | 100         |
| chr2 | 110905393 | 110905599 | NPHP1    | NM_000272    | 20 | 20 | 13  | 111     | 518  | 22809  | 110,19 | 96,4        |
| chr2 | 110907695 | 110907901 | NPHP1    | NM_000272    | 20 | 20 | 12  | 75      | 556  | 23813  | 115,04 | 100         |
| chr2 | 110917646 | 110917846 | NPHP1    | NM_000272    | 20 | 20 | 11  | 129     | 218  | 9770   | 48,61  | 100         |
| chr2 | 110919111 | 110919299 | NPHP1    | NM_000272    | 20 | 20 | 10  | 95      | 123  | 5803   | 30,7   | 100         |
| chr2 | 110920523 | 110920753 | NPHP1    | NM_000272    | 20 | 20 | 9   | 88      | 766  | 34400  | 148,92 | 100         |
| chr2 | 110922068 | 110922259 | NPHP1    | NM_000272    | 20 | 20 | 8   | 211     | 647  | 29304  | 152,63 | 77,3        |
| chr2 | 110922574 | 110922774 | NPHP1    | NM_000272    | 20 | 20 | 7   | 104     | 1948 | 86822  | 431,95 | 100         |
| chr2 | 110925955 | 110926143 | NPHP1    | NM_000272    | 20 | 20 | 6   | 102     | 609  | 21714  | 114,89 | 100         |
| chr2 | 110927312 | 110927503 | NPHP1    | NM_000272    | 20 | 20 | 5   | 193     | 1310 | 57254  | 298,2  | 62,7        |
| chr2 | 110935875 | 110936155 | NPHP1    | NM_000272    | 20 | 20 | 4   | 125     | 430  | 18681  | 66,48  | 100         |
| chr2 | 110937055 | 110937255 | NPHP1    | NM_000272    | 20 | 20 | 3   | 61      | 340  | 14900  | 74,13  | 90,2        |
| chr2 | 110958859 | 110959077 | NPHP1    | NM_000272    | 20 | 20 | 2   | 74      | 245  | 10105  | 46,14  | 100         |
| chr2 | 110962383 | 110962592 | NPHP1    | NM_000272    | 20 | 20 | 1   | 69      | 86   | 3406   | 16,22  | 100         |
| chr2 | 121554832 | 121555014 | GLI2     | NM_005270    | 13 | 13 | 1   | 148     | 293  | 11877  | 64,9   | 79,7        |
| chr2 | 121684832 | 121685017 | GLI2     | NM_005270    | 13 | 13 | 2   | 106     | 68   | 2653   | 14,26  | 76,4        |
| chr2 | 121708747 | 121708962 | GLI2     | NM_005270    | 13 | 13 | 3   | 203     | 413  | 18232  | 84,41  | 70,9        |
| chr2 | 121712738 | 121712953 | GLI2     | NM_005270    | 13 | 13 | 4   | 186     | 156  | 7349   | 34,02  | 71,5        |
| chr2 | 121726245 | 121726463 | GLI2     | NM_005270    | 13 | 13 | 5   | 202     | 1111 | 50381  | 230,05 | 86,1        |
| chr2 | 121728050 | 121728235 | GLI2     | NM_005270    | 13 | 13 | 6   | 214     | 230  | 9347   | 50,25  | 62,1        |
| chr2 | 121729414 | 121729602 | GLI2     | NM_005270    | 13 | 13 | 7   | 123     | 165  | 6951   | 36,78  | 69,9        |
| chr2 | 121732477 | 121732695 | GLI2     | NM_005270    | 13 | 13 | 8   | 186     | 266  | 11310  | 51,64  | 100         |
| chr2 | 121735933 | 121736124 | GLI2     | NM_005270    | 13 | 13 | 9   | 150     | 102  | 4384   | 22,83  | 76,7        |
| chr2 | 121740264 | 121740479 | GLI2     | NM_005270    | 13 | 13 | 10  | 165     | 197  | 8714   | 40,34  | 100         |
| chr2 | 121741991 | 121742262 | GLI2     | NM_005270    | 13 | 13 | 11  | 273     | 550  | 26142  | 96,11  | 79,1        |
| chr2 | 121743877 | 121744216 | GLI2     | NM_005270    | 13 | 13 | 12  | 337     | 334  | 15110  | 44,44  | 93,2        |
| chr2 | 121745860 | 121748356 | GLI2     | NM_005270    | 13 | 13 | 13  | 2468    | 2201 | 103726 | 41,54  | 96,9        |
| chr2 | 128015091 | 128015374 | ERCC3    | NM_000122    | 15 | 15 | 15  | 132     | 761  | 34461  | 121,34 | 100         |
| chr2 | 128016862 | 128017059 | ERCC3    | NM_000122    | 15 | 15 | 14  | 153     | 640  | 27377  | 138,27 | 100         |
| chr2 | 128018789 | 128018977 | ERCC3    | NM_000122    | 15 | 15 | 13  | 119     | 208  | 9017   | 47,71  | 100         |
| chr2 | 128028882 | 128029082 | ERCC3    | NM_000122    | 15 | 15 | 12  | 118     | 376  | 16172  | 80,46  | 100         |
| chr2 | 128030445 | 128030645 | ERCC3    | NM_000122    | 15 | 15 | 11  | 97      | 115  | 5173   | 25,74  | 95,9        |
| chr2 | 128036755 | 128036934 | ERCC3    | NM_000122    | 15 | 15 | 10  | 203     | 1172 | 50328  | 279,6  | 88,7        |
| chr2 | 128038014 | 128038217 | ERCC3    | NM_000122    | 15 | 15 | 9   | 185     | 276  | 12550  | 61,52  | 100         |
| chr2 | 128044327 | 128044690 | ERCC3    | NM_000122    | 15 | 15 | 8   | 315     | 889  | 41533  | 114,1  | 84,8        |
| chr2 | 128046168 | 128046365 | ERCC3    | NM_000122    | 15 | 15 | 7   | 205     | 1267 | 56646  | 286,09 | 63,4        |
| chr2 | 128046872 | 128047389 | ERCC3    | NM_000122    | 15 | 15 | 6,5 | 165.136 | 1263 | 59622  | 115,1  | 100.0,91.9  |
| chr2 | 128047790 | 128047987 | ERCC3    | NM_000122    | 15 | 15 | 4   | 50      | 300  | 12469  | 62,97  | 100         |
| chr2 | 128050187 | 128050476 | ERCC3    | NM_000122    | 15 | 15 | 3   | 237     | 401  | 18937  | 65,3   | 99,6        |
| chr2 | 128051064 | 128051738 | ERCC3    | NM_000122    | 15 | 15 | 2,1 | 206,28  | 1728 | 81327  | 120,48 | 100.0,100.0 |
| chr2 | 135809820 | 135810085 | RAB3GAP1 | NM_001172435 | 25 | 25 | 1,2 | 18,56   | 252  | 10560  | 39,7   | 100.0,100.0 |
| chr2 | 135815567 | 135815832 | RAB3GAP1 | NM_001172435 | 25 | 25 | 3   | 76      | 391  | 18068  | 67,92  | 100         |
| chr2 | 135848515 | 135848700 | RAB3GAP1 | NM_001172435 | 25 | 25 | 4   | 133     | 356  | 15186  | 81,65  | 100         |
| chr2 | 135851189 | 135851389 | RAB3GAP1 | NM_001172435 | 25 | 25 | 5   | 79      | 318  | 13493  | 67,13  | 94,9        |
| chr2 | 135870668 | 135870883 | RAB3GAP1 | NM_001172435 | 25 | 25 | 6   | 120     | 92   | 3898   | 18,05  | 100         |
| chr2 | 135872738 | 135872926 | RAB3GAP1 | NM_001172435 | 25 | 25 | 7   | 166     | 481  | 20687  | 109,46 | 84,9        |
| chr2 | 135878338 | 135878523 | RAB3GAP1 | NM_001172435 | 25 | 25 | 8   | 100     | 1104 | 49542  | 266,35 | 100         |
| chr2 | 135881690 | 135881866 | RAB3GAP1 | NM_001172435 | 25 | 25 | 9   | 82      | 183  | 7587   | 42,86  | 100         |
| chr2 | 135883684 | 135883869 | RAB3GAP1 | NM_001172435 | 25 | 25 | 10  | 69      | 237  | 9688   | 52,09  | 100         |
| chr2 | 135884143 | 135884340 | RAB3GAP1 | NM_001172435 | 25 | 25 | 11  | 74      | 601  | 23982  | 121,12 | 100         |
| chr2 | 135887546 | 135887725 | RAB3GAP1 | NM_001172435 | 25 | 25 | 12  | 93      | 173  | 7199   | 39,99  | 100         |
| chr2 | 135888139 | 135888327 | RAB3GAP1 | NM_001172435 | 25 | 25 | 13  | 170     | 145  | 6538   | 34,59  | 90          |

|      |           |           |          |              |    |    |          |            |       |        |        |                   |
|------|-----------|-----------|----------|--------------|----|----|----------|------------|-------|--------|--------|-------------------|
| chr2 | 135890388 | 135890570 | RAB3GAP1 | NM_001172435 | 25 | 25 | 14       | 90         | 42    | 1860   | 10,16  | 100               |
| chr2 | 135891425 | 135891616 | RAB3GAP1 | NM_001172435 | 25 | 25 | 15       | 173        | 678   | 29321  | 152,71 | 100               |
| chr2 | 135892686 | 135892892 | RAB3GAP1 | NM_001172435 | 25 | 25 | 16       | 55         | 362   | 14772  | 71,36  | 100               |
| chr2 | 135893179 | 135893536 | RAB3GAP1 | NM_001172435 | 25 | 25 | 17       | 369        | 723   | 32291  | 90,2   | 87,8              |
| chr2 | 135907871 | 135908077 | RAB3GAP1 | NM_001172435 | 25 | 25 | 18       | 138        | 303   | 12038  | 58,15  | 100               |
| chr2 | 135911180 | 135911487 | RAB3GAP1 | NM_001172435 | 25 | 25 | 19       | 228        | 263   | 11385  | 36,96  | 100               |
| chr2 | 135920030 | 135920728 | RAB3GAP1 | NM_001172435 | 25 | 25 | 20,21,22 | 97.104.116 | 1700  | 80622  | 115,34 | 100,0,100,0,100,0 |
| chr2 | 135922189 | 135922362 | RAB3GAP1 | NM_001172435 | 25 | 25 | 23       | 103        | 175   | 5890   | 33,85  | 75,7              |
| chr2 | 135925163 | 135925360 | RAB3GAP1 | NM_001172435 | 25 | 25 | 24       | 21         | 1283  | 56307  | 284,38 | 100               |
| chr2 | 135926143 | 135926426 | RAB3GAP1 | NM_001172435 | 25 | 25 | 25       | 237        | 1330  | 61982  | 218,25 | 88,2              |
| chr2 | 145146927 | 145147557 | ZEB2     | NM_014795    | 10 | 9  | 10       | 578        | 5132  | 248949 | 394,53 | 93,4              |
| chr2 | 145154040 | 145154243 | ZEB2     | NM_014795    | 10 | 9  | 9        | 181        | 627   | 26484  | 129,82 | 66,3              |
| chr2 | 145155812 | 145157778 | ZEB2     | NM_014795    | 10 | 9  | 8        | 1970       | 3852  | 184430 | 93,76  | 97                |
| chr2 | 145158695 | 145158904 | ZEB2     | NM_014795    | 10 | 9  | 7        | 109        | 443   | 20025  | 95,36  | 100               |
| chr2 | 145161417 | 145161623 | ZEB2     | NM_014795    | 10 | 9  | 6        | 215        | 816   | 35516  | 171,57 | 65,6              |
| chr2 | 145162468 | 145162662 | ZEB2     | NM_014795    | 10 | 9  | 5        | 189        | 580   | 26179  | 134,25 | 65,6              |
| chr2 | 145182369 | 145182557 | ZEB2     | NM_014795    | 10 | 9  | 4        | 72         | 111   | 4880   | 25,82  | 91,7              |
| chr2 | 145187314 | 145187677 | ZEB2     | NM_014795    | 10 | 9  | 3        | 258        | 2488  | 114080 | 313,41 | 100               |
| chr2 | 145274817 | 145275020 | ZEB2     | NM_014795    | 10 | 9  | 2        | 73         | 227   | 10168  | 49,84  | 100               |
| chr2 | 149216199 | 149216491 | MBD5     | NM_018328    | 15 | 10 | 6        | 113        | 441   | 19578  | 66,82  | 100               |
| chr2 | 149220116 | 149220292 | MBD5     | NM_018328    | 15 | 10 | 7        | 103        | 126   | 5400   | 30,51  | 100               |
| chr2 | 149221270 | 149221455 | MBD5     | NM_018328    | 15 | 10 | 8        | 181        | 151   | 6401   | 34,41  | 81,8              |
| chr2 | 149225842 | 149228042 | MBD5     | NM_018328    | 15 | 10 | 9        | 2121       | 8389  | 406589 | 184,73 | 100               |
| chr2 | 149240638 | 149241745 | MBD5     | NM_018328    | 15 | 10 | 10       | 327        | 11607 | 565327 | 510,22 | 100               |
| chr2 | 149243368 | 149243577 | MBD5     | NM_018328    | 15 | 10 | 11       | 209        | 1181  | 51543  | 245,44 | 72,7              |
| chr2 | 149246884 | 149248133 | MBD5     | NM_018328    | 15 | 10 | 12       | 1209       | 6382  | 312668 | 250,13 | 97,5              |
| chr2 | 149260007 | 149260216 | MBD5     | NM_018328    | 15 | 10 | 13       | 74         | 182   | 7704   | 36,69  | 97,3              |
| chr2 | 149267596 | 149267790 | MBD5     | NM_018328    | 15 | 10 | 14       | 76         | 152   | 5852   | 30,01  | 100               |
| chr2 | 149270465 | 149270644 | MBD5     | NM_018328    | 15 | 10 | 15       | 72         | 320   | 11540  | 64,11  | 63,9              |
| chr2 | 150426550 | 150426750 | MMADHC   | NM_015702    | 8  | 7  | 8        | 195        | 173   | 7326   | 36,45  | 68,2              |
| chr2 | 150427607 | 150427786 | MMADHC   | NM_015702    | 8  | 7  | 7        | 87         | 35    | 1611   | 8,95   | 90,8              |
| chr2 | 150432261 | 150432440 | MMADHC   | NM_015702    | 8  | 7  | 6        | 131        | 106   | 4700   | 26,11  | 72,5              |
| chr2 | 150432963 | 150433151 | MMADHC   | NM_015702    | 8  | 7  | 5        | 106        | 138   | 6022   | 31,86  | 88,7              |
| chr2 | 150435958 | 150436244 | MMADHC   | NM_015702    | 8  | 7  | 4        | 218        | 343   | 15417  | 53,72  | 94                |
| chr2 | 150438564 | 150438737 | MMADHC   | NM_015702    | 8  | 7  | 3        | 145        | 156   | 6227   | 35,79  | 66,9              |
| chr2 | 150443532 | 150443812 | MMADHC   | NM_015702    | 8  | 7  | 2        | 9          | 472   | 20532  | 73,07  | 100               |
| chr2 | 158593900 | 158594263 | ACVR1    | NM_001105    | 11 | 9  | 11       | 135        | 846   | 38610  | 106,07 | 100               |
| chr2 | 158594862 | 158595044 | ACVR1    | NM_001105    | 11 | 9  | 10       | 131        | 1187  | 50178  | 274,2  | 71                |
| chr2 | 158617327 | 158617542 | ACVR1    | NM_001105    | 11 | 9  | 9        | 198        | 281   | 11274  | 52,19  | 76,3              |
| chr2 | 158622427 | 158622707 | ACVR1    | NM_001105    | 11 | 9  | 8        | 276        | 838   | 39020  | 138,86 | 99,6              |
| chr2 | 158626792 | 158626983 | ACVR1    | NM_001105    | 11 | 9  | 7        | 147        | 547   | 23208  | 120,88 | 70,7              |
| chr2 | 158630546 | 158630755 | ACVR1    | NM_001105    | 11 | 9  | 6        | 100        | 394   | 17464  | 83,16  | 100               |
| chr2 | 158634711 | 158634917 | ACVR1    | NM_001105    | 11 | 9  | 5        | 212        | 193   | 8697   | 42,01  | 67,9              |
| chr2 | 158636900 | 158637180 | ACVR1    | NM_001105    | 11 | 9  | 4        | 264        | 364   | 16388  | 58,32  | 80,7              |
| chr2 | 158655880 | 158656068 | ACVR1    | NM_001105    | 11 | 9  | 3        | 67         | 285   | 12259  | 64,86  | 100               |
| chr2 | 166152273 | 166152547 | SCN2A    | NM_001040142 | 27 | 26 | 2        | 267        | 566   | 25672  | 93,35  | 80,1              |
| chr2 | 166153431 | 166153610 | SCN2A    | NM_001040142 | 27 | 26 | 3        | 119        | 149   | 5928   | 32,93  | 70,6              |
| chr2 | 166164281 | 166164457 | SCN2A    | NM_001040142 | 27 | 26 | 4        | 90         | 521   | 22886  | 129,3  | 100               |
| chr2 | 166165214 | 166165396 | SCN2A    | NM_001040142 | 27 | 26 | 5        | 129        | 326   | 13734  | 75,05  | 70,5              |
| chr2 | 166166885 | 166167153 | SCN2A    | NM_001040142 | 27 | 26 | 7        | 273        | 732   | 34820  | 129,44 | 81                |
| chr2 | 166168451 | 166168630 | SCN2A    | NM_001040142 | 27 | 26 | 8        | 64         | 115   | 4894   | 27,19  | 100               |
| chr2 | 166170176 | 166170438 | SCN2A    | NM_001040142 | 27 | 26 | 9,10     | 142.207    | 517   | 23247  | 88,39  | 67,6,13,0         |
| chr2 | 166170508 | 166170693 | SCN2A    | NM_001040142 | 27 | 26 | 10       | 207        | 189   | 7779   | 41,82  | 53,6              |
| chr2 | 166171999 | 166172270 | SCN2A    | NM_001040142 | 27 | 26 | 11       | 288        | 187   | 7285   | 26,78  | 93,8              |
| chr2 | 166179594 | 166179957 | SCN2A    | NM_001040142 | 27 | 26 | 12       | 345        | 1424  | 67822  | 186,32 | 84,6              |
| chr2 | 166183351 | 166183548 | SCN2A    | NM_001040142 | 27 | 26 | 13       | 133        | 322   | 14229  | 71,86  | 100               |
| chr2 | 166187815 | 166188113 | SCN2A    | NM_001040142 | 27 | 26 | 14       | 239        | 778   | 33984  | 113,66 | 100               |

|      |           |           |       |              |    |    |       |        |      |       |        |             |
|------|-----------|-----------|-------|--------------|----|----|-------|--------|------|-------|--------|-------------|
| chr2 | 166198849 | 166199043 | SCN2A | NM_001040142 | 27 | 26 | 15    | 174    | 558  | 23761 | 121,85 | 75,3        |
| chr2 | 166201187 | 166201307 | SCN2A | NM_001040142 | 27 | 26 | 16    | 357    | 392  | 13070 | 108,02 | 33,9        |
| chr2 | 166201377 | 166201497 | SCN2A | NM_001040142 | 27 | 26 | 16    | 357    | 173  | 6872  | 56,79  | 12,6        |
| chr2 | 166210756 | 166211267 | SCN2A | NM_001040142 | 27 | 26 | 17    | 480    | 1080 | 51120 | 99,84  | 88,8        |
| chr2 | 166221606 | 166221827 | SCN2A | NM_001040142 | 27 | 26 | 18    | 121    | 227  | 9961  | 44,87  | 100         |
| chr2 | 166223658 | 166223837 | SCN2A | NM_001040142 | 27 | 26 | 19    | 155    | 353  | 15401 | 85,56  | 71,6        |
| chr2 | 166226697 | 166226873 | SCN2A | NM_001040142 | 27 | 26 | 20    | 174    | 882  | 37241 | 210,4  | 64,9        |
| chr2 | 166229770 | 166229943 | SCN2A | NM_001040142 | 27 | 26 | 21    | 123    | 449  | 18564 | 106,69 | 71,5        |
| chr2 | 166231147 | 166231406 | SCN2A | NM_001040142 | 27 | 26 | 22    | 282    | 641  | 31147 | 119,8  | 75,2        |
| chr2 | 166234069 | 166234257 | SCN2A | NM_001040142 | 27 | 26 | 23    | 54     | 297  | 14175 | 75     | 100         |
| chr2 | 166237013 | 166237195 | SCN2A | NM_001040142 | 27 | 26 | 24    | 138    | 124  | 5245  | 28,66  | 68,1        |
| chr2 | 166237629 | 166237820 | SCN2A | NM_001040142 | 27 | 26 | 25    | 105    | 383  | 15057 | 78,42  | 75,2        |
| chr2 | 166243325 | 166243605 | SCN2A | NM_001040142 | 27 | 26 | 26    | 271    | 601  | 27256 | 97     | 74,5        |
| chr2 | 166245474 | 166245594 | SCN2A | NM_001040142 | 27 | 26 | 27    | 1196   | 782  | 29600 | 244,63 | 10,1        |
| chr2 | 166245904 | 166246474 | SCN2A | NM_001040142 | 27 | 26 | 27    | 1196   | 1102 | 50497 | 88,44  | 36          |
| chr2 | 166847649 | 166848154 | SCN1A | NM_001165963 | 26 | 26 | 26    | 1178   | 574  | 25891 | 51,17  | 34          |
| chr2 | 166848203 | 166848323 | SCN1A | NM_001165963 | 26 | 26 | 26    | 1178   | 80   | 2169  | 17,93  | 10,3        |
| chr2 | 166848858 | 166848978 | SCN1A | NM_001165963 | 26 | 26 | 26    | 1178   | 56   | 2598  | 21,47  | 6,4         |
| chr2 | 166850683 | 166850945 | SCN1A | NM_001165963 | 26 | 26 | 25    | 271    | 584  | 25428 | 96,68  | 90          |
| chr2 | 166852599 | 166852719 | SCN1A | NM_001165963 | 26 | 26 | 24    | 105    | 25   | 881   | 7,28   | 27,6        |
| chr2 | 166854576 | 166854761 | SCN1A | NM_001165963 | 26 | 26 | 23    | 138    | 456  | 18363 | 98,73  | 79,7        |
| chr2 | 166856168 | 166856347 | SCN1A | NM_001165963 | 26 | 26 | 22    | 54     | 613  | 26150 | 145,28 | 100         |
| chr2 | 166859024 | 166859289 | SCN1A | NM_001165963 | 26 | 26 | 21    | 282    | 500  | 22865 | 85,96  | 85,1        |
| chr2 | 166866258 | 166866437 | SCN1A | NM_001165963 | 26 | 26 | 20    | 123    | 361  | 16820 | 93,44  | 76,4        |
| chr2 | 166868677 | 166868850 | SCN1A | NM_001165963 | 26 | 26 | 19    | 174    | 469  | 20843 | 119,79 | 66,7        |
| chr2 | 166870236 | 166870430 | SCN1A | NM_001165963 | 26 | 26 | 18    | 155    | 451  | 18001 | 92,31  | 100         |
| chr2 | 166872064 | 166872291 | SCN1A | NM_001165963 | 26 | 26 | 17    | 121    | 639  | 29848 | 130,91 | 100         |
| chr2 | 166892613 | 166893103 | SCN1A | NM_001165963 | 26 | 26 | 16    | 483    | 965  | 44347 | 90,32  | 88,6        |
| chr2 | 166894417 | 166894718 | SCN1A | NM_001165963 | 26 | 26 | 15    | 357    | 612  | 27617 | 91,45  | 63,3        |
| chr2 | 166895880 | 166896080 | SCN1A | NM_001165963 | 26 | 26 | 14    | 174    | 368  | 15634 | 77,78  | 85,1        |
| chr2 | 166897683 | 166897969 | SCN1A | NM_001165963 | 26 | 26 | 13    | 239    | 328  | 14901 | 51,92  | 95,8        |
| chr2 | 166898779 | 166898958 | SCN1A | NM_001165963 | 26 | 26 | 12    | 133    | 583  | 25807 | 143,37 | 100         |
| chr2 | 166900197 | 166900637 | SCN1A | NM_001165963 | 26 | 26 | 11    | 381    | 1421 | 64453 | 146,15 | 95,3        |
| chr2 | 166901479 | 166901768 | SCN1A | NM_001165963 | 26 | 26 | 10    | 285    | 1077 | 49299 | 170    | 75,8        |
| chr2 | 166903437 | 166903557 | SCN1A | NM_001165963 | 26 | 26 | 9     | 207    | 85   | 3049  | 25,2   | 24,2        |
| chr2 | 166904137 | 166904346 | SCN1A | NM_001165963 | 26 | 26 | 8     | 142    | 439  | 19531 | 93     | 100         |
| chr2 | 166905327 | 166905533 | SCN1A | NM_001165963 | 26 | 26 | 7     | 64     | 357  | 15417 | 74,48  | 100         |
| chr2 | 166908238 | 166908548 | SCN1A | NM_001165963 | 26 | 26 | 6     | 270    | 186  | 8335  | 26,8   | 96,7        |
| chr2 | 166909432 | 166909552 | SCN1A | NM_001165963 | 26 | 26 | 5     | 92     | 94   | 3108  | 25,69  | 23,9        |
| chr2 | 166911081 | 166911278 | SCN1A | NM_001165963 | 26 | 26 | 4     | 129    | 523  | 23006 | 116,19 | 100         |
| chr2 | 166912919 | 166913140 | SCN1A | NM_001165963 | 26 | 26 | 3     | 88     | 713  | 32049 | 144,36 | 100         |
| chr2 | 166915083 | 166915253 | SCN1A | NM_001165963 | 26 | 26 | 2     | 121    | 184  | 7847  | 45,89  | 95,9        |
| chr2 | 166929942 | 166930195 | SCN1A | NM_001165963 | 26 | 26 | 1     | 264    | 639  | 26746 | 105,3  | 72          |
| chr2 | 169985106 | 169985611 | LRP2  | NM_004525    | 79 | 79 | 79,78 | 168,72 | 1515 | 71826 | 141,95 | 100,0,100,0 |
| chr2 | 169989001 | 169989222 | LRP2  | NM_004525    | 79 | 79 | 77    | 108    | 286  | 12920 | 58,2   | 100         |
| chr2 | 169993789 | 169993989 | LRP2  | NM_004525    | 79 | 79 | 76    | 102    | 307  | 13101 | 65,18  | 86,3        |
| chr2 | 169995045 | 169995257 | LRP2  | NM_004525    | 79 | 79 | 75    | 130    | 999  | 45811 | 215,08 | 100         |
| chr2 | 169995796 | 169996147 | LRP2  | NM_004525    | 79 | 79 | 74,73 | 121,68 | 812  | 37182 | 105,63 | 71,1,100,0  |
| chr2 | 169996843 | 169997049 | LRP2  | NM_004525    | 79 | 79 | 72    | 91     | 764  | 31746 | 153,36 | 93,4        |
| chr2 | 169999179 | 169999358 | LRP2  | NM_004525    | 79 | 79 | 71    | 120    | 387  | 17135 | 95,19  | 100         |
| chr2 | 170002229 | 170002447 | LRP2  | NM_004525    | 79 | 79 | 70    | 177    | 283  | 11904 | 54,36  | 100         |
| chr2 | 170003248 | 170003531 | LRP2  | NM_004525    | 79 | 79 | 69    | 221    | 1548 | 69564 | 244,94 | 100         |
| chr2 | 170007446 | 170007631 | LRP2  | NM_004525    | 79 | 79 | 68    | 129    | 797  | 35013 | 188,24 | 70,5        |
| chr2 | 170009243 | 170009440 | LRP2  | NM_004525    | 79 | 79 | 67    | 166    | 564  | 23880 | 120,61 | 79,5        |
| chr2 | 170010941 | 170011141 | LRP2  | NM_004525    | 79 | 79 | 66    | 144    | 311  | 13077 | 65,06  | 100         |
| chr2 | 170012818 | 170013021 | LRP2  | NM_004525    | 79 | 79 | 65    | 132    | 427  | 18405 | 90,22  | 74,2        |
| chr2 | 170013804 | 170014007 | LRP2  | NM_004525    | 79 | 79 | 64    | 132    | 142  | 5732  | 28,1   | 96,2        |

|      |           |           |      |           |    |    |       |         |      |        |        |            |
|------|-----------|-----------|------|-----------|----|----|-------|---------|------|--------|--------|------------|
| chr2 | 170018927 | 170019130 | LRP2 | NM_004525 | 79 | 79 | 63    | 129     | 779  | 35496  | 174    | 100        |
| chr2 | 170022474 | 170022656 | LRP2 | NM_004525 | 79 | 79 | 62    | 123     | 187  | 8487   | 46,38  | 74         |
| chr2 | 170025032 | 170025229 | LRP2 | NM_004525 | 79 | 79 | 61    | 138     | 467  | 20212  | 102,08 | 100        |
| chr2 | 170026187 | 170026384 | LRP2 | NM_004525 | 79 | 79 | 60    | 117     | 122  | 5052   | 25,52  | 100        |
| chr2 | 170026967 | 170027146 | LRP2 | NM_004525 | 79 | 79 | 59    | 117     | 624  | 26537  | 147,43 | 73,5       |
| chr2 | 170028427 | 170028609 | LRP2 | NM_004525 | 79 | 79 | 58    | 120     | 656  | 27302  | 149,19 | 70,8       |
| chr2 | 170029602 | 170029799 | LRP2 | NM_004525 | 79 | 79 | 57    | 129     | 664  | 28857  | 145,74 | 100        |
| chr2 | 170030462 | 170030766 | LRP2 | NM_004525 | 79 | 79 | 56    | 246     | 874  | 38430  | 126    | 86,6       |
| chr2 | 170031640 | 170031825 | LRP2 | NM_004525 | 79 | 79 | 55    | 197     | 645  | 26864  | 144,43 | 62,4       |
| chr2 | 170032981 | 170033175 | LRP2 | NM_004525 | 79 | 79 | 54    | 178     | 931  | 40789  | 209,17 | 66,3       |
| chr2 | 170034212 | 170034504 | LRP2 | NM_004525 | 79 | 79 | 53    | 224     | 919  | 43252  | 147,62 | 85,7       |
| chr2 | 170037912 | 170038097 | LRP2 | NM_004525 | 79 | 79 | 52    | 171     | 402  | 16325  | 87,77  | 81,9       |
| chr2 | 170038673 | 170038888 | LRP2 | NM_004525 | 79 | 79 | 51    | 153     | 66   | 2963   | 13,72  | 100        |
| chr2 | 170042034 | 170042566 | LRP2 | NM_004525 | 79 | 79 | 50    | 517     | 1431 | 69241  | 129,91 | 95,9       |
| chr2 | 170044375 | 170044762 | LRP2 | NM_004525 | 79 | 79 | 49    | 296     | 1926 | 86843  | 223,82 | 95,6       |
| chr2 | 170048294 | 170048467 | LRP2 | NM_004525 | 79 | 79 | 48    | 202     | 299  | 12619  | 72,52  | 62,4       |
| chr2 | 170050167 | 170050370 | LRP2 | NM_004525 | 79 | 79 | 47    | 132     | 524  | 22566  | 110,62 | 75,8       |
| chr2 | 170053371 | 170053565 | LRP2 | NM_004525 | 79 | 79 | 46    | 120     | 608  | 26104  | 133,87 | 100        |
| chr2 | 170055240 | 170055425 | LRP2 | NM_004525 | 79 | 79 | 45    | 126     | 529  | 22001  | 118,28 | 100        |
| chr2 | 170058073 | 170058335 | LRP2 | NM_004525 | 79 | 79 | 44    | 243     | 968  | 45231  | 171,98 | 81,5       |
| chr2 | 170059306 | 170059500 | LRP2 | NM_004525 | 79 | 79 | 43    | 204     | 2913 | 122745 | 629,46 | 80,4       |
| chr2 | 170060436 | 170060719 | LRP2 | NM_004525 | 79 | 79 | 42    | 290     | 490  | 22345  | 78,68  | 78,6       |
| chr2 | 170062042 | 170062218 | LRP2 | NM_004525 | 79 | 79 | 41    | 159     | 217  | 9382   | 53,01  | 66,7       |
| chr2 | 170062592 | 170063823 | LRP2 | NM_004525 | 79 | 79 | 40,39 | 166,921 | 5037 | 242801 | 197,08 | 64,5,100,0 |
| chr2 | 170065998 | 170066186 | LRP2 | NM_004525 | 79 | 79 | 38    | 189     | 159  | 7221   | 38,21  | 81,5       |
| chr2 | 170068502 | 170068752 | LRP2 | NM_004525 | 79 | 79 | 37    | 240     | 232  | 10586  | 42,18  | 90         |
| chr2 | 170070122 | 170070307 | LRP2 | NM_004525 | 79 | 79 | 36    | 214     | 527  | 22261  | 119,68 | 65,9       |
| chr2 | 170072805 | 170073026 | LRP2 | NM_004525 | 79 | 79 | 35    | 178     | 280  | 13199  | 59,45  | 76,4       |
| chr2 | 170076876 | 170077091 | LRP2 | NM_004525 | 79 | 79 | 34    | 110     | 655  | 29553  | 136,82 | 100        |
| chr2 | 170081806 | 170081976 | LRP2 | NM_004525 | 79 | 79 | 33    | 144     | 200  | 7560   | 44,21  | 100        |
| chr2 | 170082920 | 170083105 | LRP2 | NM_004525 | 79 | 79 | 32    | 167     | 861  | 34513  | 185,55 | 100        |
| chr2 | 170088127 | 170088321 | LRP2 | NM_004525 | 79 | 79 | 31    | 129     | 110  | 4771   | 24,47  | 76         |
| chr2 | 170089876 | 170090085 | LRP2 | NM_004525 | 79 | 79 | 30    | 178     | 440  | 18215  | 86,74  | 92,7       |
| chr2 | 170092263 | 170092528 | LRP2 | NM_004525 | 79 | 79 | 29    | 229     | 703  | 32873  | 123,58 | 78,2       |
| chr2 | 170093604 | 170093798 | LRP2 | NM_004525 | 79 | 79 | 28    | 185     | 299  | 13218  | 67,78  | 100        |
| chr2 | 170094597 | 170094800 | LRP2 | NM_004525 | 79 | 79 | 27    | 212     | 347  | 15852  | 77,71  | 94,3       |
| chr2 | 170096029 | 170096315 | LRP2 | NM_004525 | 79 | 79 | 26    | 249     | 583  | 26758  | 93,23  | 100        |
| chr2 | 170097378 | 170097910 | LRP2 | NM_004525 | 79 | 79 | 25    | 378     | 3406 | 162177 | 304,27 | 100        |
| chr2 | 170099390 | 170099593 | LRP2 | NM_004525 | 79 | 79 | 24    | 117     | 1030 | 43901  | 215,2  | 100        |
| chr2 | 170099875 | 170100066 | LRP2 | NM_004525 | 79 | 79 | 23    | 120     | 620  | 27243  | 141,89 | 100        |
| chr2 | 170101119 | 170101387 | LRP2 | NM_004525 | 79 | 79 | 22    | 240     | 613  | 27130  | 100,86 | 77,1       |
| chr2 | 170103146 | 170103432 | LRP2 | NM_004525 | 79 | 79 | 21    | 282     | 769  | 34829  | 121,36 | 77,3       |
| chr2 | 170103856 | 170104056 | LRP2 | NM_004525 | 79 | 79 | 20    | 138     | 402  | 17947  | 89,29  | 100        |
| chr2 | 170112565 | 170112756 | LRP2 | NM_004525 | 79 | 79 | 19    | 131     | 739  | 31879  | 166,04 | 100        |
| chr2 | 170113668 | 170113847 | LRP2 | NM_004525 | 79 | 79 | 18    | 126     | 224  | 10095  | 56,08  | 73         |
| chr2 | 170115473 | 170115676 | LRP2 | NM_004525 | 79 | 79 | 17    | 193     | 686  | 29583  | 145,01 | 73,6       |
| chr2 | 170127415 | 170127609 | LRP2 | NM_004525 | 79 | 79 | 16    | 204     | 199  | 8245   | 42,28  | 95,6       |
| chr2 | 170129472 | 170129660 | LRP2 | NM_004525 | 79 | 79 | 15    | 141     | 950  | 42093  | 222,71 | 75,2       |
| chr2 | 170131588 | 170131773 | LRP2 | NM_004525 | 79 | 79 | 14    | 203     | 219  | 9292   | 49,96  | 79,3       |
| chr2 | 170134251 | 170134472 | LRP2 | NM_004525 | 79 | 79 | 13    | 207     | 300  | 13385  | 60,29  | 100        |
| chr2 | 170135823 | 170136097 | LRP2 | NM_004525 | 79 | 79 | 12    | 224     | 719  | 33627  | 122,28 | 96,4       |
| chr2 | 170136781 | 170136993 | LRP2 | NM_004525 | 79 | 79 | 11    | 170     | 1328 | 57392  | 269,45 | 78,8       |
| chr2 | 170139331 | 170139561 | LRP2 | NM_004525 | 79 | 79 | 10    | 129     | 714  | 30815  | 133,4  | 100        |
| chr2 | 170145567 | 170145746 | LRP2 | NM_004525 | 79 | 79 | 9     | 120     | 312  | 14104  | 78,36  | 74,2       |
| chr2 | 170147282 | 170147458 | LRP2 | NM_004525 | 79 | 79 | 8     | 153     | 500  | 21278  | 120,21 | 68         |
| chr2 | 170148651 | 170148845 | LRP2 | NM_004525 | 79 | 79 | 7     | 117     | 765  | 32103  | 164,63 | 70,9       |
| chr2 | 170150686 | 170150868 | LRP2 | NM_004525 | 79 | 79 | 6     | 114     | 76   | 3322   | 18,15  | 75,4       |



|      |           |           |         |              |    |    |       |        |      |        |        |             |
|------|-----------|-----------|---------|--------------|----|----|-------|--------|------|--------|--------|-------------|
| chr2 | 170151004 | 170151201 | LRP2    | NM_004525    | 79 | 79 | 5     | 111    | 517  | 21513  | 108,65 | 82,9        |
| chr2 | 170163709 | 170163933 | LRP2    | NM_004525    | 79 | 79 | 4     | 117    | 419  | 18023  | 80,1   | 100         |
| chr2 | 170175172 | 170175372 | LRP2    | NM_004525    | 79 | 79 | 3     | 123    | 1966 | 83865  | 417,24 | 82,1        |
| chr2 | 170177225 | 170177455 | LRP2    | NM_004525    | 79 | 79 | 2     | 108    | 2166 | 93561  | 405,03 | 100         |
| chr2 | 170218903 | 170219023 | LRP2    | NM_004525    | 79 | 79 | 1     | 79     | 52   | 2073   | 17,13  | 8,9         |
| chr2 | 170335940 | 170336137 | BBS5    | NM_152384    | 12 | 12 | 1     | 59     | 158  | 6665   | 33,66  | 100         |
| chr2 | 170338758 | 170338952 | BBS5    | NM_152384    | 12 | 12 | 2     | 83     | 131  | 5015   | 25,72  | 100         |
| chr2 | 170343466 | 170343642 | BBS5    | NM_152384    | 12 | 12 | 3     | 66     | 82   | 3108   | 17,56  | 97          |
| chr2 | 170344268 | 170344622 | BBS5    | NM_152384    | 12 | 12 | 4,5   | 50.128 | 524  | 23086  | 65,03  | 100,0,98.4  |
| chr2 | 170349423 | 170349611 | BBS5    | NM_152384    | 12 | 12 | 6     | 136    | 321  | 13697  | 72,47  | 71,3        |
| chr2 | 170350180 | 170350368 | BBS5    | NM_152384    | 12 | 12 | 7     | 96     | 81   | 3459   | 18,3   | 100         |
| chr2 | 170353992 | 170354210 | BBS5    | NM_152384    | 12 | 12 | 8     | 63     | 109  | 4342   | 19,83  | 100         |
| chr2 | 170355986 | 170356177 | BBS5    | NM_152384    | 12 | 12 | 9     | 135    | 243  | 10472  | 54,54  | 100         |
| chr2 | 170359546 | 170359731 | BBS5    | NM_152384    | 12 | 12 | 10    | 84     | 443  | 19100  | 102,69 | 100         |
| chr2 | 170360798 | 170361170 | BBS5    | NM_152384    | 12 | 12 | 11,12 | 24.102 | 1235 | 59495  | 159,5  | 100,0,100.0 |
| chr2 | 171675026 | 171675229 | GAD1    | NM_000817    | 17 | 16 | 2     | 82     | 494  | 19927  | 97,68  | 100         |
| chr2 | 171678464 | 171678670 | GAD1    | NM_000817    | 17 | 16 | 3     | 63     | 2476 | 105317 | 508,78 | 100         |
| chr2 | 171686026 | 171686235 | GAD1    | NM_000817    | 17 | 16 | 4     | 159    | 425  | 18828  | 89,66  | 74,2        |
| chr2 | 171687365 | 171687645 | GAD1    | NM_000817    | 17 | 16 | 5     | 243    | 979  | 43953  | 156,42 | 76,5        |
| chr2 | 171693244 | 171693453 | GAD1    | NM_000817    | 17 | 16 | 6     | 91     | 215  | 9061   | 43,15  | 100         |
| chr2 | 171700534 | 171700734 | GAD1    | NM_000817    | 17 | 16 | 7     | 113    | 402  | 16827  | 83,72  | 100         |
| chr2 | 171702072 | 171702355 | GAD1    | NM_000817    | 17 | 16 | 8,9   | 116,80 | 652  | 28962  | 101,98 | 51,7,100.0  |
| chr2 | 171702484 | 171702675 | GAD1    | NM_000817    | 17 | 16 | 10    | 55     | 173  | 6347   | 33,06  | 100         |
| chr2 | 171704128 | 171704310 | GAD1    | NM_000817    | 17 | 16 | 11    | 117    | 531  | 24315  | 132,87 | 100         |
| chr2 | 171705670 | 171705858 | GAD1    | NM_000817    | 17 | 16 | 12    | 65     | 642  | 27765  | 146,9  | 96,9        |
| chr2 | 171709090 | 171709311 | GAD1    | NM_000817    | 17 | 16 | 13    | 79     | 718  | 30271  | 136,36 | 100         |
| chr2 | 171710432 | 171710623 | GAD1    | NM_000817    | 17 | 16 | 14    | 150    | 333  | 15057  | 78,42  | 67,3        |
| chr2 | 171713481 | 171713678 | GAD1    | NM_000817    | 17 | 16 | 15    | 108    | 271  | 11383  | 57,49  | 100         |
| chr2 | 171715201 | 171715383 | GAD1    | NM_000817    | 17 | 16 | 16    | 90     | 709  | 31313  | 171,11 | 77,8        |
| chr2 | 171716141 | 171716507 | GAD1    | NM_000817    | 17 | 16 | 17    | 174    | 1825 | 86208  | 234,9  | 100         |
| chr2 | 200136858 | 200137458 | SATB2   | NM_001172509 | 11 | 10 | 11    | 462    | 2645 | 125686 | 209,13 | 100         |
| chr2 | 200173496 | 200173672 | SATB2   | NM_001172509 | 11 | 10 | 10    | 198    | 1099 | 46918  | 265,07 | 89,4        |
| chr2 | 200188440 | 200188628 | SATB2   | NM_001172509 | 11 | 10 | 9     | 156    | 29   | 1223   | 6,47   | 66          |
| chr2 | 200193498 | 200193686 | SATB2   | NM_001172509 | 11 | 10 | 8     | 213    | 169  | 7213   | 38,16  | 63,8        |
| chr2 | 200213345 | 200213927 | SATB2   | NM_001172509 | 11 | 10 | 7     | 473    | 2072 | 100673 | 172,68 | 100         |
| chr2 | 200233263 | 200233436 | SATB2   | NM_001172509 | 11 | 10 | 6     | 103    | 770  | 35266  | 202,68 | 100         |
| chr2 | 200245123 | 200245320 | SATB2   | NM_001172509 | 11 | 10 | 5     | 124    | 58   | 2489   | 12,57  | 71          |
| chr2 | 200246319 | 200246507 | SATB2   | NM_001172509 | 11 | 10 | 4     | 127    | 506  | 22640  | 119,79 | 71,7        |
| chr2 | 200298123 | 200298296 | SATB2   | NM_001172509 | 11 | 10 | 3     | 177    | 581  | 25650  | 147,41 | 65          |
| chr2 | 200320624 | 200320827 | SATB2   | NM_001172509 | 11 | 10 | 2     | 169    | 19   | 734    | 3,6    | 81,1        |
| chr2 | 202488870 | 202488990 | TMEM237 | NM_001044385 | 12 | 12 | 12    | 68     | 101  | 4216   | 34,84  | 19,1        |
| chr2 | 202490724 | 202490894 | TMEM237 | NM_001044385 | 12 | 12 | 11    | 122    | 79   | 2992   | 17,5   | 100         |
| chr2 | 202491975 | 202492157 | TMEM237 | NM_001044385 | 12 | 12 | 10    | 94     | 509  | 22213  | 121,38 | 100         |
| chr2 | 202492733 | 202492924 | TMEM237 | NM_001044385 | 12 | 12 | 9     | 74     | 237  | 10370  | 54,01  | 100         |
| chr2 | 202493978 | 202494178 | TMEM237 | NM_001044385 | 12 | 12 | 8     | 192    | 336  | 14690  | 73,08  | 87          |
| chr2 | 202494488 | 202494679 | TMEM237 | NM_001044385 | 12 | 12 | 7     | 124    | 195  | 7003   | 36,47  | 71          |
| chr2 | 202496720 | 202496941 | TMEM237 | NM_001044385 | 12 | 12 | 6     | 158    | 293  | 12986  | 58,5   | 100         |
| chr2 | 202497978 | 202498163 | TMEM237 | NM_001044385 | 12 | 12 | 5     | 121    | 280  | 12307  | 66,17  | 100         |
| chr2 | 202501424 | 202501645 | TMEM237 | NM_001044385 | 12 | 12 | 4     | 138    | 129  | 5360   | 24,14  | 100         |
| chr2 | 202503660 | 202503878 | TMEM237 | NM_001044385 | 12 | 12 | 3     | 62     | 153  | 6301   | 28,77  | 100         |
| chr2 | 202505537 | 202505719 | TMEM237 | NM_001044385 | 12 | 12 | 2     | 32     | 186  | 8148   | 44,52  | 100         |
| chr2 | 202508003 | 202508197 | TMEM237 | NM_001044385 | 12 | 12 | 1     | 42     | 41   | 1835   | 9,41   | 100         |
| chr2 | 206988748 | 206989034 | NDUFS1  | NM_001199984 | 19 | 19 | 19    | 92     | 312  | 14632  | 50,98  | 100         |
| chr2 | 206991238 | 206991598 | NDUFS1  | NM_001199984 | 19 | 19 | 18,17 | 73.135 | 695  | 32225  | 89,27  | 100,0,100.0 |
| chr2 | 206992460 | 206992633 | NDUFS1  | NM_001199984 | 19 | 19 | 16    | 176    | 242  | 10069  | 57,87  | 64,2        |
| chr2 | 206994812 | 206995018 | NDUFS1  | NM_001199984 | 19 | 19 | 15    | 155    | 285  | 12506  | 60,42  | 100         |
| chr2 | 206997663 | 206997836 | NDUFS1  | NM_001199984 | 19 | 19 | 14    | 161    | 229  | 9806   | 56,36  | 100         |

|      |           |           |        |              |    |    |       |         |      |        |        |             |
|------|-----------|-----------|--------|--------------|----|----|-------|---------|------|--------|--------|-------------|
| chr2 | 207003164 | 207003376 | NDUFS1 | NM_001199984 | 19 | 19 | 13    | 130     | 161  | 6814   | 31,99  | 100         |
| chr2 | 207006634 | 207006813 | NDUFS1 | NM_001199984 | 19 | 19 | 12    | 129     | 251  | 10924  | 60,69  | 100         |
| chr2 | 207007451 | 207007642 | NDUFS1 | NM_001199984 | 19 | 19 | 11    | 146     | 713  | 32268  | 168,06 | 71,9        |
| chr2 | 207008665 | 207008880 | NDUFS1 | NM_001199984 | 19 | 19 | 10    | 115     | 761  | 33048  | 153    | 100         |
| chr2 | 207009600 | 207009797 | NDUFS1 | NM_001199984 | 19 | 19 | 9     | 135     | 1180 | 51947  | 262,36 | 100         |
| chr2 | 207011586 | 207011789 | NDUFS1 | NM_001199984 | 19 | 19 | 8     | 186     | 458  | 19601  | 96,08  | 87,6        |
| chr2 | 207012226 | 207012580 | NDUFS1 | NM_001199984 | 19 | 19 | 7,6   | 131,82  | 1021 | 46063  | 129,75 | 100,0,100,0 |
| chr2 | 207013609 | 207013830 | NDUFS1 | NM_001199984 | 19 | 19 | 5     | 77      | 447  | 20167  | 90,84  | 100         |
| chr2 | 207014430 | 207014615 | NDUFS1 | NM_001199984 | 19 | 19 | 4     | 108     | 107  | 4384   | 23,57  | 68,5        |
| chr2 | 207017091 | 207017285 | NDUFS1 | NM_001199984 | 19 | 19 | 3     | 92      | 461  | 20021  | 102,67 | 100         |
| chr2 | 207018197 | 207018412 | NDUFS1 | NM_001199984 | 19 | 19 | 2     | 65      | 86   | 3777   | 17,49  | 100         |
| chr2 | 207023666 | 207023878 | NDUFS1 | NM_001199984 | 19 | 19 | 1     | 38      | 731  | 30384  | 142,65 | 100         |
| chr2 | 219525638 | 219526220 | BCS1L  | NM_001079866 | 8  | 7  | 2,3   | 320.140 | 2753 | 125001 | 214,41 | 100,0,65,7  |
| chr2 | 219526553 | 219526738 | BCS1L  | NM_001079866 | 8  | 7  | 4     | 195     | 597  | 25001  | 134,41 | 63,6        |
| chr2 | 219526920 | 219527099 | BCS1L  | NM_001079866 | 8  | 7  | 5     | 64      | 52   | 2070   | 11,5   | 100         |
| chr2 | 219527286 | 219527471 | BCS1L  | NM_001079866 | 8  | 7  | 6     | 170     | 148  | 6325   | 34,01  | 68,8        |
| chr2 | 219527551 | 219528163 | BCS1L  | NM_001079866 | 8  | 7  | 7,8   | 118.253 | 1791 | 79040  | 128,94 | 100,0,100,0 |
| chr2 | 239974677 | 239974797 | HDAC4  | NM_006037    | 27 | 26 | 27    | 40      | 123  | 3919   | 32,39  | 12,5        |
| chr2 | 239975201 | 239975401 | HDAC4  | NM_006037    | 27 | 26 | 26    | 142     | 259  | 10529  | 52,38  | 68,3        |
| chr2 | 239976449 | 239976646 | HDAC4  | NM_006037    | 27 | 26 | 25    | 85      | 153  | 6446   | 32,56  | 95,3        |
| chr2 | 239988430 | 239988731 | HDAC4  | NM_006037    | 27 | 26 | 24    | 134     | 408  | 17642  | 58,42  | 91          |
| chr2 | 239990068 | 239990277 | HDAC4  | NM_006037    | 27 | 26 | 23    | 119     | 488  | 21162  | 100,77 | 78,2        |
| chr2 | 240002679 | 240002867 | HDAC4  | NM_006037    | 27 | 26 | 22    | 98      | 368  | 15601  | 82,54  | 78,6        |
| chr2 | 240003823 | 240004014 | HDAC4  | NM_006037    | 27 | 26 | 21    | 120     | 310  | 13272  | 69,13  | 79,2        |
| chr2 | 240005719 | 240005934 | HDAC4  | NM_006037    | 27 | 26 | 20    | 88      | 221  | 9312   | 43,11  | 95,5        |
| chr2 | 240009242 | 240009427 | HDAC4  | NM_006037    | 27 | 26 | 19    | 56      | 699  | 30710  | 165,11 | 100         |
| chr2 | 240011704 | 240011895 | HDAC4  | NM_006037    | 27 | 26 | 18    | 108     | 159  | 6925   | 36,07  | 100         |
| chr2 | 240016571 | 240016741 | HDAC4  | NM_006037    | 27 | 26 | 17    | 47      | 416  | 17435  | 101,96 | 76,6        |
| chr2 | 240024377 | 240024559 | HDAC4  | NM_006037    | 27 | 26 | 16    | 121     | 249  | 10716  | 58,56  | 72,7        |
| chr2 | 240029787 | 240029960 | HDAC4  | NM_006037    | 27 | 26 | 15    | 134     | 11   | 416    | 2,39   | 69,4        |
| chr2 | 240033205 | 240033423 | HDAC4  | NM_006037    | 27 | 26 | 14    | 187     | 17   | 747    | 3,41   | 100         |
| chr2 | 240036812 | 240037086 | HDAC4  | NM_006037    | 27 | 26 | 13    | 258     | 200  | 8388   | 30,5   | 75,6        |
| chr2 | 240048177 | 240048481 | HDAC4  | NM_006037    | 27 | 26 | 12    | 224     | 203  | 8922   | 29,25  | 88,8        |
| chr2 | 240055973 | 240056422 | HDAC4  | NM_006037    | 27 | 26 | 11,10 | 199.117 | 284  | 12818  | 28,48  | 83,9,100,0  |
| chr2 | 240061263 | 240061463 | HDAC4  | NM_006037    | 27 | 26 | 9     | 113     | 418  | 17464  | 86,89  | 74,3        |
| chr2 | 240066316 | 240066507 | HDAC4  | NM_006037    | 27 | 26 | 8     | 132     | 584  | 24267  | 126,39 | 72          |
| chr2 | 240078383 | 240078568 | HDAC4  | NM_006037    | 27 | 26 | 7     | 122     | 277  | 11376  | 61,16  | 71,3        |
| chr2 | 240085488 | 240085679 | HDAC4  | NM_006037    | 27 | 26 | 6     | 121     | 268  | 11377  | 59,26  | 100         |
| chr2 | 240098158 | 240098340 | HDAC4  | NM_006037    | 27 | 26 | 5     | 151     | 9    | 378    | 2,07   | 67,5        |
| chr2 | 240111579 | 240111862 | HDAC4  | NM_006037    | 27 | 26 | 4     | 245     | 39   | 1789   | 6,3    | 79,6        |
| chr2 | 240158299 | 240158484 | HDAC4  | NM_006037    | 27 | 26 | 3     | 72      | 213  | 8838   | 47,52  | 86,1        |
| chr2 | 240274375 | 240274581 | HDAC4  | NM_006037    | 27 | 26 | 2     | 22      | 324  | 13623  | 65,81  | 90,9        |
| chr2 | 242674605 | 242674912 | D2HGDH | NM_152783    | 10 | 9  | 2     | 292     | 10   | 480    | 1,56   | 93,5        |
| chr2 | 242680331 | 242680504 | D2HGDH | NM_152783    | 10 | 9  | 3     | 58      | 297  | 13299  | 76,43  | 98,3        |
| chr2 | 242681873 | 242682094 | D2HGDH | NM_152783    | 10 | 9  | 4     | 140     | 364  | 15315  | 68,99  | 83,6        |
| chr2 | 242683003 | 242683203 | D2HGDH | NM_152783    | 10 | 9  | 5     | 194     | 57   | 2488   | 12,38  | 86,1        |
| chr2 | 242684137 | 242684337 | D2HGDH | NM_152783    | 10 | 9  | 6     | 169     | 882  | 39420  | 196,12 | 92,3        |
| chr2 | 242689471 | 242689665 | D2HGDH | NM_152783    | 10 | 9  | 7     | 144     | 613  | 26175  | 134,23 | 69,4        |
| chr2 | 242690556 | 242690756 | D2HGDH | NM_152783    | 10 | 9  | 8     | 143     | 183  | 7670   | 38,16  | 67,1        |
| chr2 | 242695183 | 242695374 | D2HGDH | NM_152783    | 10 | 9  | 9     | 166     | 589  | 25814  | 134,45 | 66,9        |
| chr2 | 242707145 | 242707502 | D2HGDH | NM_152783    | 10 | 9  | 10    | 260     | 137  | 6248   | 17,45  | 92,3        |
| chr3 | 3192514   | 3192794   | CRBN   | NM_016302    | 11 | 11 | 11    | 181     | 365  | 16161  | 57,51  | 100         |
| chr3 | 3194099   | 3194299   | CRBN   | NM_016302    | 11 | 11 | 10    | 132     | 575  | 24969  | 124,22 | 100         |
| chr3 | 3195099   | 3195302   | CRBN   | NM_016302    | 11 | 11 | 9     | 65      | 283  | 11108  | 54,45  | 100         |
| chr3 | 3195574   | 3195774   | CRBN   | NM_016302    | 11 | 11 | 8     | 116     | 377  | 17248  | 85,81  | 100         |
| chr3 | 3196327   | 3196515   | CRBN   | NM_016302    | 11 | 11 | 7     | 85      | 289  | 12708  | 67,24  | 100         |
| chr3 | 3197842   | 3198039   | CRBN   | NM_016302    | 11 | 11 | 6     | 63      | 181  | 7235   | 36,54  | 100         |

|      |          |          |        |              |    |    |       |         |      |       |        |            |
|------|----------|----------|--------|--------------|----|----|-------|---------|------|-------|--------|------------|
| chr3 | 3209217  | 3209506  | CRBN   | NM_016302    | 11 | 11 | 5     | 160     | 668  | 30661 | 105,73 | 100        |
| chr3 | 3214440  | 3214619  | CRBN   | NM_016302    | 11 | 11 | 4     | 150     | 369  | 15907 | 88,37  | 100        |
| chr3 | 3215764  | 3215973  | CRBN   | NM_016302    | 11 | 11 | 3     | 203     | 401  | 17947 | 85,46  | 89,7       |
| chr3 | 3216829  | 3217035  | CRBN   | NM_016302    | 11 | 11 | 2     | 107     | 155  | 6674  | 32,24  | 100        |
| chr3 | 3221260  | 3221436  | CRBN   | NM_016302    | 11 | 11 | 1     | 67      | 56   | 2425  | 13,7   | 100        |
| chr3 | 10070285 | 10070488 | FANCD2 | NM_033084    | 43 | 42 | 2     | 64      | 135  | 5611  | 27,5   | 100        |
| chr3 | 10074518 | 10074718 | FANCD2 | NM_033084    | 43 | 42 | 3     | 141     | 100  | 4274  | 21,26  | 98,6       |
| chr3 | 10076104 | 10076479 | FANCD2 | NM_033084    | 43 | 42 | 4,5   | 68.104  | 430  | 19201 | 51,07  | 100,0,97.1 |
| chr3 | 10076849 | 10077046 | FANCD2 | NM_033084    | 43 | 42 | 6     | 61      | 503  | 22215 | 112,2  | 100        |
| chr3 | 10077881 | 10078063 | FANCD2 | NM_033084    | 43 | 42 | 7     | 53      | 204  | 8911  | 48,69  | 100        |
| chr3 | 10080913 | 10081101 | FANCD2 | NM_033084    | 43 | 42 | 8     | 79      | 501  | 22733 | 120,28 | 100        |
| chr3 | 10081418 | 10081683 | FANCD2 | NM_033084    | 43 | 42 | 9     | 125     | 422  | 19014 | 71,48  | 89,6       |
| chr3 | 10083178 | 10083437 | FANCD2 | NM_033084    | 43 | 42 | 10    | 88      | 500  | 22185 | 85,33  | 100        |
| chr3 | 10084236 | 10084421 | FANCD2 | NM_033084    | 43 | 42 | 11    | 105     | 284  | 11696 | 62,88  | 100        |
| chr3 | 10084728 | 10084928 | FANCD2 | NM_033084    | 43 | 42 | 12    | 101     | 265  | 11133 | 55,39  | 100        |
| chr3 | 10088190 | 10088360 | FANCD2 | NM_033084    | 43 | 42 | 15    | 144     | 226  | 9403  | 54,99  | 67,4       |
| chr3 | 10089642 | 10089833 | FANCD2 | NM_033084    | 43 | 42 | 16    | 135     | 599  | 25389 | 132,23 | 69,6       |
| chr3 | 10093950 | 10094150 | FANCD2 | NM_033084    | 43 | 42 | 18    | 111     | 95   | 4076  | 20,28  | 72,1       |
| chr3 | 10102007 | 10102207 | FANCD2 | NM_033084    | 43 | 42 | 19    | 110     | 526  | 22638 | 112,63 | 73,6       |
| chr3 | 10103829 | 10103949 | FANCD2 | NM_033084    | 43 | 42 | 20    | 61      | 70   | 2638  | 21,8   | 100        |
| chr3 | 10105510 | 10105680 | FANCD2 | NM_033084    | 43 | 42 | 21    | 120     | 222  | 9844  | 57,57  | 71,7       |
| chr3 | 10106322 | 10106442 | FANCD2 | NM_033084    | 43 | 42 | 23    | 147     | 88   | 3479  | 28,75  | 20,4       |
| chr3 | 10107048 | 10107251 | FANCD2 | NM_033084    | 43 | 42 | 24    | 101     | 218  | 9498  | 46,56  | 100        |
| chr3 | 10108891 | 10109064 | FANCD2 | NM_033084    | 43 | 42 | 26    | 109     | 570  | 24938 | 143,32 | 100        |
| chr3 | 10114584 | 10114757 | FANCD2 | NM_033084    | 43 | 42 | 27    | 111     | 231  | 8870  | 50,98  | 73,9       |
| chr3 | 10114966 | 10115151 | FANCD2 | NM_033084    | 43 | 42 | 28    | 110     | 341  | 15684 | 84,32  | 73,6       |
| chr3 | 10116182 | 10116388 | FANCD2 | NM_033084    | 43 | 42 | 29    | 144     | 540  | 22976 | 111    | 100        |
| chr3 | 10119674 | 10119859 | FANCD2 | NM_033084    | 43 | 42 | 30    | 117     | 957  | 38486 | 206,91 | 81,2       |
| chr3 | 10122728 | 10123094 | FANCD2 | NM_033084    | 43 | 42 | 31,32 | 129.119 | 1104 | 51662 | 140,77 | 100,0,54.6 |
| chr3 | 10127384 | 10127581 | FANCD2 | NM_033084    | 43 | 42 | 33    | 111     | 235  | 10508 | 53,07  | 77,5       |
| chr3 | 10128767 | 10128940 | FANCD2 | NM_033084    | 43 | 42 | 34    | 131     | 731  | 31211 | 179,37 | 93,9       |
| chr3 | 10130064 | 10130288 | FANCD2 | NM_033084    | 43 | 42 | 35    | 94      | 479  | 21542 | 95,74  | 100        |
| chr3 | 10130427 | 10130609 | FANCD2 | NM_033084    | 43 | 42 | 36    | 123     | 146  | 5888  | 32,17  | 79,7       |
| chr3 | 10131922 | 10132119 | FANCD2 | NM_033084    | 43 | 42 | 37    | 94      | 209  | 9549  | 48,23  | 100        |
| chr3 | 10133767 | 10133982 | FANCD2 | NM_033084    | 43 | 42 | 38    | 72      | 260  | 11361 | 52,6   | 100        |
| chr3 | 10134941 | 10135147 | FANCD2 | NM_033084    | 43 | 42 | 39    | 39      | 628  | 27600 | 133,33 | 100        |
| chr3 | 10135840 | 10136043 | FANCD2 | NM_033084    | 43 | 42 | 40    | 75      | 125  | 5110  | 25,05  | 94,7       |
| chr3 | 10136745 | 10136954 | FANCD2 | NM_033084    | 43 | 42 | 41    | 75      | 114  | 4688  | 22,32  | 94,7       |
| chr3 | 10137931 | 10138113 | FANCD2 | NM_033084    | 43 | 42 | 42    | 147     | 717  | 29964 | 163,74 | 70,7       |
| chr3 | 10140318 | 10140740 | FANCD2 | NM_033084    | 43 | 42 | 43    | 231     | 1031 | 47082 | 111,3  | 100        |
| chr3 | 12625897 | 12626091 | RAF1   | NM_002880    | 17 | 16 | 17    | 144     | 244  | 10884 | 55,82  | 54,9       |
| chr3 | 12626403 | 12626816 | RAF1   | NM_002880    | 17 | 16 | 16,15 | 135.132 | 1060 | 51809 | 125,14 | 57,8,100.0 |
| chr3 | 12627210 | 12627413 | RAF1   | NM_002880    | 17 | 16 | 14    | 119     | 942  | 41818 | 204,99 | 74,8       |
| chr3 | 12629027 | 12629254 | RAF1   | NM_002880    | 17 | 16 | 13    | 47      | 142  | 6105  | 26,78  | 100        |
| chr3 | 12632341 | 12632538 | RAF1   | NM_002880    | 17 | 16 | 12    | 177     | 523  | 22679 | 114,54 | 75,1       |
| chr3 | 12633223 | 12633408 | RAF1   | NM_002880    | 17 | 16 | 11    | 85      | 531  | 24009 | 129,08 | 81,2       |
| chr3 | 12641214 | 12641408 | RAF1   | NM_002880    | 17 | 16 | 10    | 118     | 124  | 5006  | 25,67  | 79,7       |
| chr3 | 12641711 | 12641967 | RAF1   | NM_002880    | 17 | 16 | 9,8   | 128,28  | 446  | 18909 | 73,58  | 53.1,100.0 |
| chr3 | 12645671 | 12645871 | RAF1   | NM_002880    | 17 | 16 | 7     | 154     | 449  | 19151 | 95,28  | 76,6       |
| chr3 | 12647579 | 12647782 | RAF1   | NM_002880    | 17 | 16 | 6     | 99      | 218  | 9500  | 46,57  | 83,8       |
| chr3 | 12650261 | 12650473 | RAF1   | NM_002880    | 17 | 16 | 5     | 158     | 305  | 13707 | 64,35  | 100        |
| chr3 | 12650640 | 12650843 | RAF1   | NM_002880    | 17 | 16 | 4     | 103     | 307  | 13649 | 66,91  | 100        |
| chr3 | 12653374 | 12653571 | RAF1   | NM_002880    | 17 | 16 | 3     | 113     | 577  | 22704 | 114,67 | 100        |
| chr3 | 12659979 | 12660268 | RAF1   | NM_002880    | 17 | 16 | 2     | 207     | 857  | 38902 | 134,14 | 100        |
| chr3 | 24164243 | 24164597 | THRB   | NM_001128177 | 11 | 8  | 11    | 242     | 979  | 44830 | 126,28 | 92,1       |
| chr3 | 24169035 | 24169330 | THRB   | NM_001128177 | 11 | 8  | 10    | 259     | 1926 | 89213 | 301,4  | 82,6       |
| chr3 | 24174785 | 24174982 | THRB   | NM_001128177 | 11 | 8  | 9     | 147     | 671  | 29762 | 150,31 | 100        |

|      |          |          |        |              |    |    |        |             |      |        |        |                   |
|------|----------|----------|--------|--------------|----|----|--------|-------------|------|--------|--------|-------------------|
| chr3 | 24184925 | 24185125 | THRB   | NM_001128177 | 11 | 8  | 8      | 206         | 703  | 31668  | 157,55 | 65                |
| chr3 | 24188076 | 24188282 | THRB   | NM_001128177 | 11 | 8  | 7      | 148         | 586  | 24553  | 118,61 | 79,1              |
| chr3 | 24193905 | 24194090 | THRB   | NM_001128177 | 11 | 8  | 6      | 101         | 151  | 6611   | 35,54  | 76,2              |
| chr3 | 24231494 | 24231765 | THRB   | NM_001128177 | 11 | 8  | 5      | 261         | 1362 | 62091  | 228,28 | 77                |
| chr3 | 24270374 | 24270550 | THRB   | NM_001128177 | 11 | 8  | 4      | 22          | 140  | 4764   | 26,92  | 100               |
| chr3 | 30648235 | 30648447 | TGFBR2 | NM_001024847 | 8  | 8  | 1      | 94          | 11   | 442    | 2,08   | 76,6              |
| chr3 | 30664633 | 30664824 | TGFBR2 | NM_001024847 | 8  | 8  | 2      | 75          | 543  | 21065  | 109,71 | 100               |
| chr3 | 30686162 | 30686356 | TGFBR2 | NM_001024847 | 8  | 8  | 3      | 169         | 256  | 10757  | 55,16  | 69,8              |
| chr3 | 30691762 | 30691950 | TGFBR2 | NM_001024847 | 8  | 8  | 4      | 191         | 355  | 14484  | 76,63  | 99                |
| chr3 | 30713055 | 30713880 | TGFBR2 | NM_001024847 | 8  | 8  | 5      | 800         | 2834 | 133144 | 161,19 | 93,9              |
| chr3 | 30715531 | 30715728 | TGFBR2 | NM_001024847 | 8  | 8  | 6      | 142         | 292  | 13049  | 65,9   | 93                |
| chr3 | 30729914 | 30730093 | TGFBR2 | NM_001024847 | 8  | 8  | 7      | 128         | 141  | 5645   | 31,36  | 70,3              |
| chr3 | 30732963 | 30733154 | TGFBR2 | NM_001024847 | 8  | 8  | 8      | 180         | 187  | 8174   | 42,57  | 71,7              |
| chr3 | 41265511 | 41265702 | CTNNB1 | NM_001904    | 15 | 14 | 2      | 13          | 1259 | 52090  | 271,3  | 100               |
| chr3 | 41265975 | 41266285 | CTNNB1 | NM_001904    | 15 | 14 | 3      | 228         | 938  | 43608  | 140,22 | 100               |
| chr3 | 41266429 | 41267358 | CTNNB1 | NM_001904    | 15 | 14 | 4,5,6  | 254.239.202 | 2356 | 113869 | 122,44 | 100.0,100.0,100.0 |
| chr3 | 41268679 | 41268855 | CTNNB1 | NM_001904    | 15 | 14 | 7      | 145         | 158  | 6767   | 38,23  | 100               |
| chr3 | 41274743 | 41275737 | CTNNB1 | NM_001904    | 15 | 14 | 8,9,10 | 104.339.159 | 3383 | 158463 | 159,26 | 100.0,100.0,67.9  |
| chr3 | 41277135 | 41277350 | CTNNB1 | NM_001904    | 15 | 14 | 11     | 120         | 181  | 8270   | 38,29  | 100               |
| chr3 | 41277800 | 41278154 | CTNNB1 | NM_001904    | 15 | 14 | 12,13  | 151.122     | 853  | 41294  | 116,32 | 100.0,62.3        |
| chr3 | 41279511 | 41279684 | CTNNB1 | NM_001904    | 15 | 14 | 14     | 61          | 281  | 11829  | 67,98  | 93,4              |
| chr3 | 41280634 | 41280929 | CTNNB1 | NM_001904    | 15 | 14 | 15     | 209         | 436  | 19241  | 65     | 95,7              |
| chr3 | 43408233 | 43408513 | ANO10  | NM_018075    | 13 | 12 | 13     | 69          | 1159 | 48979  | 174,3  | 100               |
| chr3 | 43474033 | 43474242 | ANO10  | NM_018075    | 13 | 12 | 12     | 117         | 246  | 10980  | 52,29  | 100               |
| chr3 | 43591190 | 43591360 | ANO10  | NM_018075    | 13 | 12 | 11     | 129         | 416  | 17725  | 103,65 | 100               |
| chr3 | 43596777 | 43596971 | ANO10  | NM_018075    | 13 | 12 | 10     | 192         | 530  | 22503  | 115,4  | 96,4              |
| chr3 | 43602687 | 43602860 | ANO10  | NM_018075    | 13 | 12 | 9      | 183         | 547  | 23154  | 133,07 | 81,4              |
| chr3 | 43607090 | 43607266 | ANO10  | NM_018075    | 13 | 12 | 8      | 75          | 75   | 3435   | 19,41  | 100               |
| chr3 | 43616273 | 43616467 | ANO10  | NM_018075    | 13 | 12 | 7      | 56          | 115  | 4726   | 24,24  | 100               |
| chr3 | 43618153 | 43618762 | ANO10  | NM_018075    | 13 | 12 | 6      | 570         | 2838 | 137638 | 225,64 | 100               |
| chr3 | 43621744 | 43621935 | ANO10  | NM_018075    | 13 | 12 | 5      | 120         | 584  | 26157  | 136,23 | 75,8              |
| chr3 | 43639951 | 43640154 | ANO10  | NM_018075    | 13 | 12 | 4      | 135         | 105  | 4380   | 21,47  | 97                |
| chr3 | 43641919 | 43642149 | ANO10  | NM_018075    | 13 | 12 | 3      | 198         | 55   | 2300   | 9,96   | 78,3              |
| chr3 | 43647146 | 43647358 | ANO10  | NM_018075    | 13 | 12 | 2      | 139         | 274  | 11039  | 51,83  | 100               |
| chr3 | 43732368 | 43732568 | ABHD5  | NM_016006    | 7  | 7  | 1      | 47          | 8    | 366    | 1,82   | 100               |
| chr3 | 43740650 | 43740853 | ABHD5  | NM_016006    | 7  | 7  | 2      | 86          | 681  | 30130  | 147,7  | 100               |
| chr3 | 43743727 | 43744060 | ABHD5  | NM_016006    | 7  | 7  | 3      | 373         | 864  | 41860  | 125,33 | 89,5              |
| chr3 | 43753162 | 43753392 | ABHD5  | NM_016006    | 7  | 7  | 4      | 155         | 241  | 10609  | 45,93  | 100               |
| chr3 | 43756379 | 43756555 | ABHD5  | NM_016006    | 7  | 7  | 5      | 112         | 275  | 11000  | 62,15  | 100               |
| chr3 | 43759095 | 43759292 | ABHD5  | NM_016006    | 7  | 7  | 6      | 187         | 374  | 15911  | 80,36  | 69,5              |
| chr3 | 43759891 | 43760156 | ABHD5  | NM_016006    | 7  | 7  | 7      | 90          | 555  | 25751  | 96,81  | 100               |
| chr3 | 48507802 | 48509116 | TREX1  | NM_016381    | 1  | 1  | 1      | 1110        | 4166 | 198745 | 151,14 | 100               |
| chr3 | 49454661 | 49455504 | AMT    | NM_000481    | 9  | 9  | 9,8    | 179.156     | 1879 | 89994  | 106,63 | 100.0,100.0       |
| chr3 | 49456430 | 49456870 | AMT    | NM_000481    | 9  | 9  | 7,6    | 181.146     | 2640 | 126646 | 287,18 | 85.6,100.0        |
| chr3 | 49457006 | 49457227 | AMT    | NM_000481    | 9  | 9  | 5      | 79          | 437  | 18325  | 82,55  | 100               |
| chr3 | 49457543 | 49457740 | AMT    | NM_000481    | 9  | 9  | 4      | 132         | 596  | 25234  | 127,44 | 73,5              |
| chr3 | 49458939 | 49459133 | AMT    | NM_000481    | 9  | 9  | 3      | 81          | 2159 | 91812  | 470,83 | 82,7              |
| chr3 | 49459371 | 49459980 | AMT    | NM_000481    | 9  | 9  | 2,1    | 168,90      | 1574 | 74288  | 121,78 | 100.0,100.0       |
| chr3 | 52109755 | 52109940 | POC1A  | NM_001161581 | 11 | 9  | 11     | 99          | 1486 | 66772  | 358,99 | 38,4              |
| chr3 | 52130628 | 52130831 | POC1A  | NM_001161581 | 11 | 9  | 10     | 144         | 66   | 2957   | 14,5   | 70,1              |
| chr3 | 52156388 | 52156564 | POC1A  | NM_001161581 | 11 | 9  | 9      | 99          | 584  | 25860  | 146,1  | 100               |
| chr3 | 52159107 | 52159286 | POC1A  | NM_001161581 | 11 | 9  | 8      | 69          | 481  | 20879  | 115,99 | 100               |
| chr3 | 52172154 | 52172342 | POC1A  | NM_001161581 | 11 | 9  | 7      | 134         | 503  | 22165  | 117,28 | 100               |
| chr3 | 52179888 | 52180076 | POC1A  | NM_001161581 | 11 | 9  | 6      | 116         | 516  | 22677  | 119,98 | 77,6              |
| chr3 | 52180972 | 52181160 | POC1A  | NM_001161581 | 11 | 9  | 5      | 108         | 524  | 22179  | 117,35 | 100               |
| chr3 | 52183242 | 52183457 | POC1A  | NM_001161581 | 11 | 9  | 4      | 180         | 655  | 27773  | 128,58 | 91,1              |
| chr3 | 52183796 | 52183993 | POC1A  | NM_001161581 | 11 | 9  | 3      | 161         | 677  | 28829  | 145,6  | 100               |

|      |           |           |        |              |    |    |       |        |      |       |        |             |
|------|-----------|-----------|--------|--------------|----|----|-------|--------|------|-------|--------|-------------|
| chr3 | 52184973  | 52185161  | POC1A  | NM_001161581 | 11 | 9  | 2     | 156    | 340  | 14441 | 76,41  | 83,3        |
| chr3 | 52188432  | 52188552  | POC1A  | NM_001161581 | 11 | 9  | 1     | 336    | 30   | 1224  | 10,12  | 36          |
| chr3 | 53125850  | 53126041  | RFT1   | NM_052859    | 13 | 13 | 13    | 168    | 287  | 12950 | 67,45  | 73,2        |
| chr3 | 53126432  | 53126700  | RFT1   | NM_052859    | 13 | 13 | 12    | 250    | 51   | 2134  | 7,93   | 81,2        |
| chr3 | 53133274  | 53133486  | RFT1   | NM_052859    | 13 | 13 | 11    | 106    | 270  | 11759 | 55,21  | 84,9        |
| chr3 | 53137871  | 53138071  | RFT1   | NM_052859    | 13 | 13 | 10    | 145    | 297  | 12879 | 64,07  | 71          |
| chr3 | 53139584  | 53139787  | RFT1   | NM_052859    | 13 | 13 | 9     | 131    | 662  | 28851 | 141,43 | 75,6        |
| chr3 | 53140813  | 53141031  | RFT1   | NM_052859    | 13 | 13 | 8     | 51     | 287  | 11633 | 53,12  | 100         |
| chr3 | 53145814  | 53146014  | RFT1   | NM_052859    | 13 | 13 | 7     | 79     | 249  | 11281 | 56,12  | 100         |
| chr3 | 53153871  | 53154056  | RFT1   | NM_052859    | 13 | 13 | 6     | 138    | 210  | 8682  | 46,68  | 100         |
| chr3 | 53155594  | 53155886  | RFT1   | NM_052859    | 13 | 13 | 5     | 102    | 281  | 13326 | 45,48  | 100         |
| chr3 | 53156402  | 53156623  | RFT1   | NM_052859    | 13 | 13 | 4     | 190    | 333  | 14722 | 66,32  | 93,7        |
| chr3 | 53157772  | 53157954  | RFT1   | NM_052859    | 13 | 13 | 3     | 117    | 158  | 6656  | 36,37  | 72,6        |
| chr3 | 53159909  | 53160097  | RFT1   | NM_052859    | 13 | 13 | 2     | 86     | 354  | 15218 | 80,52  | 100         |
| chr3 | 53164389  | 53164583  | RFT1   | NM_052859    | 13 | 13 | 1     | 63     | 158  | 6829  | 35,02  | 44,4        |
| chr3 | 57232128  | 57232568  | HESX1  | NM_003865    | 4  | 4  | 4,3   | 99.102 | 591  | 26794 | 60,76  | 100.0,100.0 |
| chr3 | 57232705  | 57232908  | HESX1  | NM_003865    | 4  | 4  | 2     | 200    | 363  | 15046 | 73,75  | 64          |
| chr3 | 57233721  | 57233986  | HESX1  | NM_003865    | 4  | 4  | 1     | 157    | 426  | 19878 | 74,73  | 100         |
| chr3 | 71008278  | 71008558  | FOXP1  | NM_001244810 | 21 | 16 | 21    | 145    | 1123 | 51207 | 182,23 | 100         |
| chr3 | 71015086  | 71015277  | FOXP1  | NM_001244810 | 21 | 16 | 20    | 167    | 478  | 19767 | 102,95 | 73,1        |
| chr3 | 71019878  | 71020078  | FOXP1  | NM_001244810 | 21 | 16 | 19    | 70     | 254  | 10093 | 50,21  | 100         |
| chr3 | 71021253  | 71021474  | FOXP1  | NM_001244810 | 21 | 16 | 18    | 170    | 136  | 5666  | 25,52  | 46,5        |
| chr3 | 71026105  | 71026302  | FOXP1  | NM_001244810 | 21 | 16 | 17    | 102    | 362  | 15909 | 80,35  | 87,3        |
| chr3 | 71026820  | 71027266  | FOXP1  | NM_001244810 | 21 | 16 | 16,15 | 80.202 | 970  | 46430 | 103,87 | 67.5,100.0  |
| chr3 | 71037083  | 71037301  | FOXP1  | NM_001244810 | 21 | 16 | 14    | 84     | 169  | 7271  | 33,2   | 100         |
| chr3 | 71050078  | 71050251  | FOXP1  | NM_001244810 | 21 | 16 | 13    | 88     | 459  | 18932 | 108,8  | 100         |
| chr3 | 71064579  | 71064785  | FOXP1  | NM_001244810 | 21 | 16 | 12    | 105    | 219  | 9707  | 46,89  | 81,9        |
| chr3 | 71090531  | 71090740  | FOXP1  | NM_001244810 | 21 | 16 | 11    | 205    | 374  | 16436 | 78,27  | 74,6        |
| chr3 | 71096136  | 71096333  | FOXP1  | NM_001244810 | 21 | 16 | 10    | 154    | 176  | 7256  | 36,65  | 72,1        |
| chr3 | 71101626  | 71101817  | FOXP1  | NM_001244810 | 21 | 16 | 9     | 90     | 312  | 12239 | 63,74  | 100         |
| chr3 | 71102830  | 71103006  | FOXP1  | NM_001244810 | 21 | 16 | 8     | 138    | 399  | 16949 | 95,76  | 68,8        |
| chr3 | 71161592  | 71161777  | FOXP1  | NM_001244810 | 21 | 16 | 7     | 102    | 711  | 30536 | 164,17 | 89,2        |
| chr3 | 71246970  | 71247502  | FOXP1  | NM_001244810 | 21 | 16 | 6     | 180    | 1060 | 50553 | 94,85  | 83,3        |
| chr3 | 93699156  | 93699276  | ARL13B | NM_001174150 | 10 | 10 | 1     | 59     | 46   | 1739  | 14,37  | 15,3        |
| chr3 | 93714664  | 93714840  | ARL13B | NM_001174150 | 10 | 10 | 2     | 71     | 135  | 5878  | 33,21  | 100         |
| chr3 | 93722499  | 93722758  | ARL13B | NM_001174150 | 10 | 10 | 3     | 250    | 333  | 15446 | 59,41  | 100         |
| chr3 | 93754166  | 93754348  | ARL13B | NM_001174150 | 10 | 10 | 4     | 106    | 183  | 7265  | 39,7   | 100         |
| chr3 | 93755426  | 93755629  | ARL13B | NM_001174150 | 10 | 10 | 5     | 203    | 116  | 5073  | 24,87  | 85,2        |
| chr3 | 93758662  | 93758877  | ARL13B | NM_001174150 | 10 | 10 | 6     | 109    | 224  | 8749  | 40,5   | 100         |
| chr3 | 93761846  | 93762099  | ARL13B | NM_001174150 | 10 | 10 | 7     | 226    | 78   | 3075  | 12,11  | 100         |
| chr3 | 93768234  | 93768437  | ARL13B | NM_001174150 | 10 | 10 | 8     | 117    | 118  | 5372  | 26,33  | 100         |
| chr3 | 93769580  | 93769780  | ARL13B | NM_001174150 | 10 | 10 | 9     | 69     | 256  | 11693 | 58,17  | 100         |
| chr3 | 93771958  | 93772220  | ARL13B | NM_001174150 | 10 | 10 | 10    | 77     | 578  | 26583 | 101,08 | 100         |
| chr3 | 97486909  | 97487085  | ARL6   | NM_177976    | 9  | 7  | 3     | 123    | 241  | 10380 | 58,64  | 100         |
| chr3 | 97498945  | 97499139  | ARL6   | NM_177976    | 9  | 7  | 4     | 62     | 225  | 9889  | 50,71  | 100         |
| chr3 | 97499431  | 97499619  | ARL6   | NM_177976    | 9  | 7  | 5     | 69     | 418  | 18883 | 99,91  | 100         |
| chr3 | 97503787  | 97503969  | ARL6   | NM_177976    | 9  | 7  | 6     | 95     | 810  | 34258 | 187,2  | 100         |
| chr3 | 97506837  | 97507028  | ARL6   | NM_177976    | 9  | 7  | 7     | 130    | 269  | 11166 | 58,16  | 97,7        |
| chr3 | 97510551  | 97510730  | ARL6   | NM_177976    | 9  | 7  | 8     | 56     | 233  | 9947  | 55,26  | 100         |
| chr3 | 97516862  | 97517065  | ARL6   | NM_177976    | 9  | 7  | 9     | 26     | 268  | 11038 | 54,11  | 100         |
| chr3 | 128598504 | 128598873 | ACAD9  | NM_014049    | 18 | 18 | 1     | 150    | 520  | 25268 | 68,29  | 100         |
| chr3 | 128603514 | 128603705 | ACAD9  | NM_014049    | 18 | 18 | 2     | 94     | 481  | 21097 | 109,88 | 80,9        |
| chr3 | 128612349 | 128612558 | ACAD9  | NM_014049    | 18 | 18 | 3     | 102    | 358  | 14111 | 67,2   | 100         |
| chr3 | 128614033 | 128614230 | ACAD9  | NM_014049    | 18 | 18 | 4     | 107    | 95   | 3805  | 19,22  | 72,9        |
| chr3 | 128615168 | 128615353 | ACAD9  | NM_014049    | 18 | 18 | 5     | 101    | 576  | 24197 | 130,09 | 74,3        |
| chr3 | 128616360 | 128616536 | ACAD9  | NM_014049    | 18 | 18 | 6     | 79     | 809  | 35379 | 199,88 | 78,5        |
| chr3 | 128618116 | 128618310 | ACAD9  | NM_014049    | 18 | 18 | 7     | 175    | 379  | 17029 | 87,33  | 100         |

|      |           |           |        |           |    |    |       |         |      |       |        |             |
|------|-----------|-----------|--------|-----------|----|----|-------|---------|------|-------|--------|-------------|
| chr3 | 128620022 | 128620210 | ACAD9  | NM_014049 | 18 | 18 | 8     | 74      | 350  | 14719 | 77,88  | 100         |
| chr3 | 128621265 | 128621489 | ACAD9  | NM_014049 | 18 | 18 | 9     | 76      | 314  | 13493 | 59,97  | 100         |
| chr3 | 128622839 | 128623045 | ACAD9  | NM_014049 | 18 | 18 | 10    | 71      | 786  | 34933 | 168,76 | 100         |
| chr3 | 128623125 | 128623316 | ACAD9  | NM_014049 | 18 | 18 | 11    | 120     | 506  | 20537 | 106,96 | 73,3        |
| chr3 | 128624924 | 128625127 | ACAD9  | NM_014049 | 18 | 18 | 12    | 129     | 181  | 7748  | 37,98  | 100         |
| chr3 | 128627001 | 128627207 | ACAD9  | NM_014049 | 18 | 18 | 13    | 80      | 346  | 14451 | 69,81  | 100         |
| chr3 | 128627805 | 128628023 | ACAD9  | NM_014049 | 18 | 18 | 14    | 127     | 585  | 25052 | 114,39 | 100         |
| chr3 | 128628149 | 128628370 | ACAD9  | NM_014049 | 18 | 18 | 15    | 78      | 417  | 17683 | 79,65  | 100         |
| chr3 | 128628809 | 128629169 | ACAD9  | NM_014049 | 18 | 18 | 16    | 129     | 200  | 9346  | 25,89  | 100         |
| chr3 | 128629498 | 128629674 | ACAD9  | NM_014049 | 18 | 18 | 17    | 73      | 786  | 31742 | 179,33 | 100         |
| chr3 | 128631427 | 128631757 | ACAD9  | NM_014049 | 18 | 18 | 18    | 101     | 1083 | 47025 | 142,07 | 23,8        |
| chr3 | 139062799 | 139063002 | MRPS22 | NM_020191 | 8  | 8  | 1     | 172     | 291  | 12845 | 62,97  | 77,9        |
| chr3 | 139065747 | 139065953 | MRPS22 | NM_020191 | 8  | 8  | 2     | 167     | 266  | 11316 | 54,67  | 83,8        |
| chr3 | 139067046 | 139067252 | MRPS22 | NM_020191 | 8  | 8  | 3     | 165     | 570  | 23455 | 113,31 | 73,3        |
| chr3 | 139068941 | 139069144 | MRPS22 | NM_020191 | 8  | 8  | 4     | 144     | 287  | 12284 | 60,22  | 86,1        |
| chr3 | 139069772 | 139069945 | MRPS22 | NM_020191 | 8  | 8  | 5     | 84      | 566  | 24324 | 139,79 | 100         |
| chr3 | 139071392 | 139071586 | MRPS22 | NM_020191 | 8  | 8  | 6     | 146     | 105  | 4916  | 25,21  | 67,1        |
| chr3 | 139074380 | 139074565 | MRPS22 | NM_020191 | 8  | 8  | 7     | 109     | 685  | 28696 | 154,28 | 38,5        |
| chr3 | 139075735 | 139075908 | MRPS22 | NM_020191 | 8  | 8  | 8     | 96      | 73   | 2467  | 14,18  | 100         |
| chr3 | 142168214 | 142168485 | ATR    | NM_001184 | 47 | 47 | 47    | 174     | 292  | 13066 | 48,04  | 100         |
| chr3 | 142171823 | 142172088 | ATR    | NM_001184 | 47 | 47 | 46    | 106     | 548  | 25016 | 94,05  | 100         |
| chr3 | 142176415 | 142176615 | ATR    | NM_001184 | 47 | 47 | 45    | 152     | 799  | 34499 | 171,64 | 100         |
| chr3 | 142177849 | 142178289 | ATR    | NM_001184 | 47 | 47 | 44,43 | 154.157 | 505  | 24333 | 55,18  | 68.2,100.0  |
| chr3 | 142180738 | 142180920 | ATR    | NM_001184 | 47 | 47 | 42    | 151     | 497  | 21967 | 120,04 | 92,1        |
| chr3 | 142183916 | 142184095 | ATR    | NM_001184 | 47 | 47 | 41    | 144     | 216  | 10075 | 55,97  | 100         |
| chr3 | 142185140 | 142185331 | ATR    | NM_001184 | 47 | 47 | 40    | 210     | 1349 | 60358 | 314,36 | 79          |
| chr3 | 142186724 | 142186915 | ATR    | NM_001184 | 47 | 47 | 39    | 135     | 412  | 17981 | 93,65  | 100         |
| chr3 | 142188160 | 142188428 | ATR    | NM_001184 | 47 | 47 | 38    | 233     | 482  | 22325 | 82,99  | 100         |
| chr3 | 142188852 | 142189031 | ATR    | NM_001184 | 47 | 47 | 37    | 98      | 631  | 27133 | 150,74 | 100         |
| chr3 | 142203934 | 142204107 | ATR    | NM_001184 | 47 | 47 | 36    | 143     | 682  | 29499 | 169,53 | 88,1        |
| chr3 | 142211966 | 142212160 | ATR    | NM_001184 | 47 | 47 | 35    | 180     | 335  | 15109 | 77,48  | 100         |
| chr3 | 142215257 | 142215433 | ATR    | NM_001184 | 47 | 47 | 34    | 160     | 73   | 3105  | 17,54  | 66,2        |
| chr3 | 142215802 | 142216029 | ATR    | NM_001184 | 47 | 47 | 33    | 180     | 336  | 13469 | 59,07  | 97,2        |
| chr3 | 142217451 | 142217663 | ATR    | NM_001184 | 47 | 47 | 32    | 178     | 177  | 7564  | 35,51  | 93,3        |
| chr3 | 142218420 | 142218605 | ATR    | NM_001184 | 47 | 47 | 31    | 92      | 1460 | 64934 | 349,11 | 100         |
| chr3 | 142222155 | 142222334 | ATR    | NM_001184 | 47 | 47 | 30    | 92      | 274  | 11410 | 63,39  | 100         |
| chr3 | 142223962 | 142224162 | ATR    | NM_001184 | 47 | 47 | 29    | 165     | 389  | 17991 | 89,51  | 100         |
| chr3 | 142226791 | 142226979 | ATR    | NM_001184 | 47 | 47 | 28    | 179     | 170  | 7346  | 38,87  | 89,9        |
| chr3 | 142231103 | 142231318 | ATR    | NM_001184 | 47 | 47 | 27    | 211     | 171  | 7259  | 33,61  | 99,5        |
| chr3 | 142232290 | 142232484 | ATR    | NM_001184 | 47 | 47 | 26    | 138     | 366  | 16083 | 82,48  | 100         |
| chr3 | 142234157 | 142234360 | ATR    | NM_001184 | 47 | 47 | 25    | 121     | 137  | 5470  | 26,81  | 100         |
| chr3 | 142238471 | 142238674 | ATR    | NM_001184 | 47 | 47 | 24    | 116     | 352  | 15342 | 75,21  | 100         |
| chr3 | 142241511 | 142241702 | ATR    | NM_001184 | 47 | 47 | 23    | 114     | 423  | 18531 | 96,52  | 100         |
| chr3 | 142242837 | 142243046 | ATR    | NM_001184 | 47 | 47 | 22    | 207     | 818  | 36602 | 174,3  | 99          |
| chr3 | 142253920 | 142254114 | ATR    | NM_001184 | 47 | 47 | 21    | 126     | 187  | 7492  | 38,42  | 100         |
| chr3 | 142254884 | 142255081 | ATR    | NM_001184 | 47 | 47 | 20    | 94      | 293  | 11927 | 60,24  | 100         |
| chr3 | 142257310 | 142257510 | ATR    | NM_001184 | 47 | 47 | 19    | 144     | 163  | 6945  | 34,55  | 100         |
| chr3 | 142259713 | 142259913 | ATR    | NM_001184 | 47 | 47 | 18    | 131     | 558  | 25394 | 126,34 | 100         |
| chr3 | 142261434 | 142261607 | ATR    | NM_001184 | 47 | 47 | 17    | 93      | 318  | 13221 | 75,98  | 100         |
| chr3 | 142266544 | 142266732 | ATR    | NM_001184 | 47 | 47 | 16    | 186     | 229  | 9961  | 52,7   | 89,2        |
| chr3 | 142268392 | 142268568 | ATR    | NM_001184 | 47 | 47 | 15    | 195     | 129  | 5714  | 32,28  | 63,6        |
| chr3 | 142268979 | 142269191 | ATR    | NM_001184 | 47 | 47 | 14    | 171     | 170  | 7087  | 33,27  | 97,1        |
| chr3 | 142272069 | 142272251 | ATR    | NM_001184 | 47 | 47 | 13    | 172     | 430  | 18672 | 102,03 | 100         |
| chr3 | 142272449 | 142272892 | ATR    | NM_001184 | 47 | 47 | 12,11 | 101.191 | 1041 | 49203 | 110,82 | 100.0,100.0 |
| chr3 | 142274739 | 142275019 | ATR    | NM_001184 | 47 | 47 | 10    | 263     | 871  | 35577 | 126,61 | 92,4        |
| chr3 | 142275208 | 142275435 | ATR    | NM_001184 | 47 | 47 | 9     | 193     | 226  | 9956  | 43,67  | 100         |
| chr3 | 142277453 | 142277626 | ATR    | NM_001184 | 47 | 47 | 8     | 153     | 2024 | 84113 | 483,41 | 100         |

|      |           |           |         |              |    |    |                |                    |      |        |        |                               |
|------|-----------|-----------|---------|--------------|----|----|----------------|--------------------|------|--------|--------|-------------------------------|
| chr3 | 142278123 | 142278302 | ATR     | NM_001184    | 47 | 47 | 7              | 191                | 417  | 17480  | 97,11  | 84,3                          |
| chr3 | 142279052 | 142279240 | ATR     | NM_001184    | 47 | 47 | 6              | 192                | 344  | 15041  | 79,58  | 70,8                          |
| chr3 | 142280031 | 142280237 | ATR     | NM_001184    | 47 | 47 | 5              | 179                | 619  | 26883  | 129,87 | 85,5                          |
| chr3 | 142281076 | 142282002 | ATR     | NM_001184    | 47 | 47 | 4              | 878                | 1892 | 90158  | 97,26  | 99,8                          |
| chr3 | 142284905 | 142285108 | ATR     | NM_001184    | 47 | 47 | 3              | 141                | 333  | 13517  | 66,26  | 100                           |
| chr3 | 142286880 | 142287077 | ATR     | NM_001184    | 47 | 47 | 2              | 92                 | 168  | 6979   | 35,25  | 100                           |
| chr3 | 142297419 | 142297622 | ATR     | NM_001184    | 47 | 47 | 1              | 59                 | 161  | 7304   | 35,8   | 100                           |
| chr3 | 155545916 | 155546101 | SLC33A1 | NM_001190992 | 7  | 6  | 6              | 168                | 419  | 18144  | 97,55  | 61,3                          |
| chr3 | 155547450 | 155547709 | SLC33A1 | NM_001190992 | 7  | 6  | 5              | 216                | 603  | 28030  | 107,81 | 100                           |
| chr3 | 155551194 | 155551376 | SLC33A1 | NM_001190992 | 7  | 6  | 4              | 118                | 379  | 15879  | 86,77  | 100                           |
| chr3 | 155551634 | 155551840 | SLC33A1 | NM_001190992 | 7  | 6  | 3              | 185                | 306  | 12909  | 62,36  | 100                           |
| chr3 | 155560214 | 155560405 | SLC33A1 | NM_001190992 | 7  | 6  | 2              | 188                | 48   | 1956   | 10,19  | 98,4                          |
| chr3 | 155570969 | 155571883 | SLC33A1 | NM_001190992 | 7  | 6  | 1              | 775                | 1300 | 61869  | 67,62  | 100                           |
| chr3 | 180703579 | 180703785 | DNAJC19 | NM_145261    | 6  | 6  | 5              | 71                 | 532  | 22568  | 109,02 | 100                           |
| chr3 | 180704745 | 180704915 | DNAJC19 | NM_145261    | 6  | 6  | 4              | 80                 | 184  | 7949   | 46,49  | 82,5                          |
| chr3 | 180705843 | 180706055 | DNAJC19 | NM_145261    | 6  | 6  | 3,2            | 74,52              | 402  | 18163  | 85,27  | 56.8,100.0                    |
| chr3 | 182733134 | 182733420 | MCCC1   | NM_020166    | 19 | 19 | 19             | 129                | 1860 | 87882  | 306,21 | 100                           |
| chr3 | 182734965 | 182735159 | MCCC1   | NM_020166    | 19 | 19 | 18             | 72                 | 395  | 16957  | 86,96  | 100                           |
| chr3 | 182737871 | 182738071 | MCCC1   | NM_020166    | 19 | 19 | 17             | 108                | 216  | 7781   | 38,71  | 100                           |
| chr3 | 182740143 | 182740343 | MCCC1   | NM_020166    | 19 | 19 | 16             | 138                | 533  | 23706  | 117,94 | 100                           |
| chr3 | 182743419 | 182743619 | MCCC1   | NM_020166    | 19 | 19 | 15             | 50                 | 665  | 29434  | 146,44 | 100                           |
| chr3 | 182751646 | 182751858 | MCCC1   | NM_020166    | 19 | 19 | 14             | 87                 | 48   | 1890   | 8,87   | 92                            |
| chr3 | 182754934 | 182755238 | MCCC1   | NM_020166    | 19 | 19 | 13             | 217                | 724  | 32871  | 107,77 | 100                           |
| chr3 | 182756840 | 182757013 | MCCC1   | NM_020166    | 19 | 19 | 12             | 110                | 1091 | 45986  | 264,29 | 76,4                          |
| chr3 | 182759403 | 182759621 | MCCC1   | NM_020166    | 19 | 19 | 11             | 184                | 94   | 4130   | 18,86  | 73,9                          |
| chr3 | 182763167 | 182763349 | MCCC1   | NM_020166    | 19 | 19 | 10             | 128                | 420  | 17837  | 97,47  | 100                           |
| chr3 | 182769878 | 182770084 | MCCC1   | NM_020166    | 19 | 19 | 9              | 82                 | 645  | 26438  | 127,72 | 100                           |
| chr3 | 182775009 | 182775239 | MCCC1   | NM_020166    | 19 | 19 | 8              | 112                | 167  | 6973   | 30,19  | 100                           |
| chr3 | 182788740 | 182789070 | MCCC1   | NM_020166    | 19 | 19 | 7,6            | 122.148            | 1664 | 69086  | 208,72 | 100.0,49.3                    |
| chr3 | 182790075 | 182790284 | MCCC1   | NM_020166    | 19 | 19 | 5              | 122                | 93   | 3904   | 18,59  | 100                           |
| chr3 | 182804389 | 182804610 | MCCC1   | NM_020166    | 19 | 19 | 4              | 96                 | 169  | 7976   | 35,93  | 100                           |
| chr3 | 182810149 | 182810370 | MCCC1   | NM_020166    | 19 | 19 | 3              | 137                | 497  | 22418  | 100,98 | 100                           |
| chr3 | 182812272 | 182812454 | MCCC1   | NM_020166    | 19 | 19 | 2              | 47                 | 810  | 35616  | 194,62 | 100                           |
| chr3 | 182817191 | 182817373 | MCCC1   | NM_020166    | 19 | 19 | 1              | 89                 | 175  | 6878   | 37,58  | 42,7                          |
| chr3 | 183960193 | 183960692 | ALG3    | NM_005787    | 9  | 9  | 9,8            | 163.145            | 1792 | 84745  | 169,49 | 100.0,63.4                    |
| chr3 | 183961290 | 183961706 | ALG3    | NM_005787    | 9  | 9  | 7,6            | 77.206             | 1986 | 90786  | 217,71 | 100.0,62.1                    |
| chr3 | 183962423 | 183962602 | ALG3    | NM_005787    | 9  | 9  | 5              | 121                | 98   | 4212   | 23,4   | 71,9                          |
| chr3 | 183962886 | 183963649 | ALG3    | NM_005787    | 9  | 9  | 4,3,2          | 161.148.100        | 2208 | 105209 | 137,71 | 100.0,100.0,100.0             |
| chr3 | 183966525 | 183967110 | ALG3    | NM_005787    | 9  | 9  | 1              | 196                | 2747 | 128768 | 219,74 | 100                           |
| chr4 | 980526    | 980978    | IDUA    | NM_000203    | 14 | 14 | 1              | 158                | 339  | 14692  | 32,43  | 67,1                          |
| chr4 | 981453    | 981831    | IDUA    | NM_000203    | 14 | 14 | 2              | 141                | 147  | 5778   | 15,25  | 100                           |
| chr4 | 994344    | 994775    | IDUA    | NM_000203    | 14 | 14 | 3,4            | 86.108             | 296  | 13530  | 31,32  | 100.0,98.1                    |
| chr4 | 995173    | 996235    | IDUA    | NM_000203    | 14 | 14 | 5,6,7,8        | 96.203.180.217     | 946  | 44322  | 41,7   | 100.0,100.0,100.0,82.5        |
| chr4 | 996479    | 996922    | IDUA    | NM_000203    | 14 | 14 | 9,10           | 213.122            | 2    | 90     | 0,2    | 100.0,81.1                    |
| chr4 | 997207    | 997481    | IDUA    | NM_000203    | 14 | 14 | 11,12          | 126,77             | 67   | 2934   | 10,67  | 41.3,100.0                    |
| chr4 | 997845    | 998300    | IDUA    | NM_000203    | 14 | 14 | 13,14          | 101.134            | 569  | 26064  | 57,16  | 55.4,100.0                    |
| chr4 | 1795066   | 1795281   | FGFR3   | NM_001163213 | 18 | 17 | 1              | 154                | 0    | 0      | 0      | 82,5                          |
| chr4 | 1795628   | 1795825   | FGFR3   | NM_001163213 | 18 | 17 | 2              | 109                | 17   | 695    | 3,51   | 100                           |
| chr4 | 1800903   | 1801195   | FGFR3   | NM_001163213 | 18 | 17 | 3              | 279                | 92   | 4017   | 13,71  | 79,6                          |
| chr4 | 1801373   | 1801564   | FGFR3   | NM_001163213 | 18 | 17 | 4              | 66                 | 79   | 3399   | 17,7   | 100                           |
| chr4 | 1803019   | 1803717   | FGFR3   | NM_001163213 | 18 | 17 | 5,6,7          | 170.124.191        | 132  | 5542   | 7,93   | 100.0,100.0,81.7              |
| chr4 | 1804624   | 1804809   | FGFR3   | NM_001163213 | 18 | 17 | 8              | 151                | 41   | 1877   | 10,09  | 100                           |
| chr4 | 1806045   | 1806263   | FGFR3   | NM_001163213 | 18 | 17 | 9              | 191                | 93   | 4263   | 19,47  | 100                           |
| chr4 | 1806492   | 1806677   | FGFR3   | NM_001163213 | 18 | 17 | 10             | 146                | 25   | 1187   | 6,38   | 87                            |
| chr4 | 1807082   | 1808076   | FGFR3   | NM_001163213 | 18 | 17 | 11,12,13,14,15 | 122,111,191,123,71 | 479  | 22086  | 22,2   | 100.0,100.0,100.0,100.0,100.0 |
| chr4 | 1808323   | 1809474   | FGFR3   | NM_001163213 | 18 | 17 | 16,17,18       | 138.106.147        | 418  | 19200  | 16,67  | 63.8,100.0,100.0              |
| chr4 | 15477439  | 15477621  | CC2D2A  | NM_001080522 | 38 | 36 | 3              | 39                 | 126  | 5207   | 28,45  | 100                           |

|      |          |          |         |              |    |    |    |     |      |       |        |      |
|------|----------|----------|---------|--------------|----|----|----|-----|------|-------|--------|------|
| chr4 | 15480222 | 15480422 | CC2D2A  | NM_001080522 | 38 | 36 | 4  | 84  | 213  | 8915  | 44,35  | 90,5 |
| chr4 | 15482349 | 15482558 | CC2D2A  | NM_001080522 | 38 | 36 | 5  | 124 | 407  | 17479 | 83,23  | 83,1 |
| chr4 | 15504019 | 15504240 | CC2D2A  | NM_001080522 | 38 | 36 | 6  | 89  | 159  | 7126  | 32,1   | 100  |
| chr4 | 15504380 | 15504610 | CC2D2A  | NM_001080522 | 38 | 36 | 7  | 102 | 344  | 13504 | 58,46  | 100  |
| chr4 | 15511670 | 15511882 | CC2D2A  | NM_001080522 | 38 | 36 | 8  | 102 | 201  | 8065  | 37,86  | 100  |
| chr4 | 15512820 | 15513079 | CC2D2A  | NM_001080522 | 38 | 36 | 9  | 177 | 474  | 20953 | 80,59  | 100  |
| chr4 | 15516295 | 15516519 | CC2D2A  | NM_001080522 | 38 | 36 | 10 | 163 | 380  | 16170 | 71,87  | 100  |
| chr4 | 15517410 | 15517583 | CC2D2A  | NM_001080522 | 38 | 36 | 11 | 137 | 89   | 3671  | 21,1   | 67,9 |
| chr4 | 15518198 | 15518422 | CC2D2A  | NM_001080522 | 38 | 36 | 12 | 132 | 370  | 16238 | 72,17  | 100  |
| chr4 | 15529125 | 15529334 | CC2D2A  | NM_001080522 | 38 | 36 | 13 | 210 | 233  | 10422 | 49,63  | 73,8 |
| chr4 | 15530198 | 15530380 | CC2D2A  | NM_001080522 | 38 | 36 | 14 | 107 | 372  | 16629 | 90,87  | 100  |
| chr4 | 15534800 | 15534970 | CC2D2A  | NM_001080522 | 38 | 36 | 15 | 141 | 60   | 2486  | 14,54  | 100  |
| chr4 | 15538520 | 15538708 | CC2D2A  | NM_001080522 | 38 | 36 | 16 | 157 | 35   | 1542  | 8,16   | 100  |
| chr4 | 15539440 | 15539720 | CC2D2A  | NM_001080522 | 38 | 36 | 17 | 239 | 139  | 6547  | 23,3   | 83,3 |
| chr4 | 15542385 | 15542600 | CC2D2A  | NM_001080522 | 38 | 36 | 18 | 178 | 264  | 10969 | 50,78  | 79,2 |
| chr4 | 15552448 | 15552663 | CC2D2A  | NM_001080522 | 38 | 36 | 19 | 157 | 284  | 12307 | 56,98  | 99,4 |
| chr4 | 15554829 | 15555014 | CC2D2A  | NM_001080522 | 38 | 36 | 20 | 148 | 235  | 10499 | 56,45  | 67,6 |
| chr4 | 15556594 | 15556797 | CC2D2A  | NM_001080522 | 38 | 36 | 21 | 139 | 204  | 8434  | 41,34  | 74,1 |
| chr4 | 15558949 | 15559149 | CC2D2A  | NM_001080522 | 38 | 36 | 22 | 204 | 257  | 11225 | 55,85  | 89,2 |
| chr4 | 15560760 | 15560975 | CC2D2A  | NM_001080522 | 38 | 36 | 23 | 93  | 326  | 15011 | 69,5   | 100  |
| chr4 | 15562039 | 15562248 | CC2D2A  | NM_001080522 | 38 | 36 | 24 | 92  | 84   | 3505  | 16,69  | 100  |
| chr4 | 15564901 | 15565089 | CC2D2A  | NM_001080522 | 38 | 36 | 25 | 168 | 385  | 15690 | 83,02  | 66,7 |
| chr4 | 15568898 | 15569083 | CC2D2A  | NM_001080522 | 38 | 36 | 26 | 106 | 272  | 12304 | 66,15  | 79,2 |
| chr4 | 15569254 | 15569445 | CC2D2A  | NM_001080522 | 38 | 36 | 27 | 110 | 330  | 14620 | 76,15  | 100  |
| chr4 | 15570824 | 15571027 | CC2D2A  | NM_001080522 | 38 | 36 | 28 | 97  | 458  | 20101 | 98,53  | 100  |
| chr4 | 15571930 | 15572136 | CC2D2A  | NM_001080522 | 38 | 36 | 29 | 99  | 251  | 10596 | 51,19  | 100  |
| chr4 | 15575784 | 15576002 | CC2D2A  | NM_001080522 | 38 | 36 | 30 | 177 | 328  | 14364 | 65,59  | 93,8 |
| chr4 | 15581667 | 15581840 | CC2D2A  | NM_001080522 | 38 | 36 | 31 | 204 | 885  | 37326 | 214,52 | 62,7 |
| chr4 | 15587712 | 15587927 | CC2D2A  | NM_001080522 | 38 | 36 | 32 | 90  | 566  | 26252 | 121,54 | 100  |
| chr4 | 15589416 | 15589640 | CC2D2A  | NM_001080522 | 38 | 36 | 33 | 114 | 411  | 17738 | 78,84  | 100  |
| chr4 | 15591104 | 15591295 | CC2D2A  | NM_001080522 | 38 | 36 | 34 | 135 | 466  | 19956 | 103,94 | 94,8 |
| chr4 | 15597596 | 15597823 | CC2D2A  | NM_001080522 | 38 | 36 | 35 | 123 | 891  | 35877 | 157,36 | 94,3 |
| chr4 | 15598982 | 15599182 | CC2D2A  | NM_001080522 | 38 | 36 | 36 | 59  | 365  | 14831 | 73,79  | 100  |
| chr4 | 15601158 | 15601379 | CC2D2A  | NM_001080522 | 38 | 36 | 37 | 178 | 292  | 12756 | 57,46  | 96,6 |
| chr4 | 15602794 | 15603133 | CC2D2A  | NM_001080522 | 38 | 36 | 38 | 189 | 524  | 25189 | 74,09  | 100  |
| chr4 | 56212389 | 56212675 | SRD5A3  | NM_024592    | 5  | 5  | 1  | 221 | 18   | 752   | 2,62   | 77,8 |
| chr4 | 56225558 | 56225740 | SRD5A3  | NM_024592    | 5  | 5  | 2  | 143 | 895  | 36429 | 199,07 | 68,5 |
| chr4 | 56230164 | 56230382 | SRD5A3  | NM_024592    | 5  | 5  | 3  | 198 | 843  | 37393 | 170,74 | 71,7 |
| chr4 | 56233679 | 56233888 | SRD5A3  | NM_024592    | 5  | 5  | 4  | 135 | 134  | 5352  | 25,49  | 99,3 |
| chr4 | 56235924 | 56236364 | SRD5A3  | NM_024592    | 5  | 5  | 5  | 260 | 1632 | 77891 | 176,62 | 100  |
| chr4 | 56262296 | 56262579 | TMEM165 | NM_018475    | 6  | 6  | 1  | 207 | 5    | 194   | 0,68   | 100  |
| chr4 | 56277822 | 56278105 | TMEM165 | NM_018475    | 6  | 6  | 2  | 226 | 457  | 20662 | 72,75  | 81,9 |
| chr4 | 56283220 | 56283420 | TMEM165 | NM_018475    | 6  | 6  | 3  | 176 | 356  | 15098 | 75,11  | 100  |
| chr4 | 56283993 | 56284178 | TMEM165 | NM_018475    | 6  | 6  | 4  | 183 | 397  | 17032 | 91,57  | 87,4 |
| chr4 | 56290729 | 56290905 | TMEM165 | NM_018475    | 6  | 6  | 5  | 106 | 140  | 5897  | 33,32  | 77,4 |
| chr4 | 56291456 | 56291739 | TMEM165 | NM_018475    | 6  | 6  | 6  | 77  | 786  | 36912 | 129,97 | 100  |
| chr4 | 56818261 | 56818464 | CEP135  | NM_025009    | 26 | 24 | 2  | 113 | 223  | 9141  | 44,81  | 100  |
| chr4 | 56819248 | 56819448 | CEP135  | NM_025009    | 26 | 24 | 3  | 191 | 53   | 1894  | 9,42   | 100  |
| chr4 | 56820380 | 56820568 | CEP135  | NM_025009    | 26 | 24 | 4  | 168 | 188  | 8321  | 44,03  | 100  |
| chr4 | 56823350 | 56823565 | CEP135  | NM_025009    | 26 | 24 | 5  | 142 | 883  | 38501 | 178,25 | 100  |
| chr4 | 56825800 | 56826133 | CEP135  | NM_025009    | 26 | 24 | 6  | 85  | 656  | 31473 | 94,23  | 100  |
| chr4 | 56830385 | 56830573 | CEP135  | NM_025009    | 26 | 24 | 7  | 129 | 375  | 16161 | 85,51  | 100  |
| chr4 | 56831777 | 56832075 | CEP135  | NM_025009    | 26 | 24 | 8  | 216 | 418  | 19059 | 63,74  | 100  |
| chr4 | 56835116 | 56835331 | CEP135  | NM_025009    | 26 | 24 | 9  | 66  | 43   | 1983  | 9,18   | 100  |
| chr4 | 56837419 | 56837592 | CEP135  | NM_025009    | 26 | 24 | 10 | 139 | 177  | 6998  | 40,22  | 100  |
| chr4 | 56840889 | 56841163 | CEP135  | NM_025009    | 26 | 24 | 11 | 224 | 461  | 19169 | 69,71  | 100  |
| chr4 | 56846218 | 56846427 | CEP135  | NM_025009    | 26 | 24 | 12 | 153 | 108  | 4554  | 21,69  | 77,8 |



|      |          |          |        |              |    |    |       |         |      |       |        |            |
|------|----------|----------|--------|--------------|----|----|-------|---------|------|-------|--------|------------|
| chr4 | 56847350 | 56847526 | CEP135 | NM_025009    | 26 | 24 | 13    | 153     | 167  | 7030  | 39,72  | 87,6       |
| chr4 | 56851361 | 56851558 | CEP135 | NM_025009    | 26 | 24 | 14    | 78      | 264  | 11949 | 60,35  | 100        |
| chr4 | 56858120 | 56858302 | CEP135 | NM_025009    | 26 | 24 | 15    | 152     | 321  | 12168 | 66,49  | 86,8       |
| chr4 | 56865432 | 56865786 | CEP135 | NM_025009    | 26 | 24 | 16,17 | 116.155 | 186  | 9037  | 25,46  | 100,0,83.9 |
| chr4 | 56874486 | 56874689 | CEP135 | NM_025009    | 26 | 24 | 18    | 56      | 571  | 23986 | 117,58 | 100        |
| chr4 | 56875872 | 56876081 | CEP135 | NM_025009    | 26 | 24 | 19    | 169     | 186  | 7965  | 37,93  | 100        |
| chr4 | 56877577 | 56877762 | CEP135 | NM_025009    | 26 | 24 | 20    | 111     | 84   | 2779  | 14,94  | 100        |
| chr4 | 56877946 | 56878161 | CEP135 | NM_025009    | 26 | 24 | 21    | 186     | 131  | 5368  | 24,85  | 100        |
| chr4 | 56883797 | 56883976 | CEP135 | NM_025009    | 26 | 24 | 22    | 210     | 92   | 4161  | 23,12  | 77,6       |
| chr4 | 56885585 | 56885767 | CEP135 | NM_025009    | 26 | 24 | 23    | 203     | 513  | 23242 | 127,01 | 67,5       |
| chr4 | 56886778 | 56886963 | CEP135 | NM_025009    | 26 | 24 | 24    | 105     | 299  | 11937 | 64,18  | 100        |
| chr4 | 56890694 | 56890888 | CEP135 | NM_025009    | 26 | 24 | 25    | 103     | 579  | 25876 | 132,7  | 73,8       |
| chr4 | 72102244 | 72102441 | SLC4A4 | NM_001134742 | 25 | 24 | 2     | 73      | 135  | 5736  | 28,97  | 100        |
| chr4 | 72120971 | 72121141 | SLC4A4 | NM_001134742 | 25 | 24 | 3     | 180     | 129  | 4873  | 28,5   | 81,1       |
| chr4 | 72204873 | 72205153 | SLC4A4 | NM_001134742 | 25 | 24 | 4     | 136     | 1006 | 45242 | 161    | 49,3       |
| chr4 | 72215596 | 72215823 | SLC4A4 | NM_001134742 | 25 | 24 | 5     | 161     | 427  | 19084 | 83,7   | 100        |
| chr4 | 72222669 | 72222842 | SLC4A4 | NM_001134742 | 25 | 24 | 6     | 180     | 267  | 12387 | 71,19  | 65,6       |
| chr4 | 72263246 | 72263419 | SLC4A4 | NM_001134742 | 25 | 24 | 7     | 77      | 498  | 21178 | 121,71 | 100        |
| chr4 | 72306260 | 72306442 | SLC4A4 | NM_001134742 | 25 | 24 | 8     | 158     | 388  | 17395 | 95,05  | 69,6       |
| chr4 | 72313300 | 72313512 | SLC4A4 | NM_001134742 | 25 | 24 | 9     | 88      | 422  | 18814 | 88,33  | 100        |
| chr4 | 72316079 | 72316288 | SLC4A4 | NM_001134742 | 25 | 24 | 10    | 155     | 324  | 13494 | 64,26  | 100        |
| chr4 | 72316810 | 72316986 | SLC4A4 | NM_001134742 | 25 | 24 | 11    | 114     | 58   | 2491  | 14,07  | 71,9       |
| chr4 | 72319186 | 72319389 | SLC4A4 | NM_001134742 | 25 | 24 | 12    | 175     | 200  | 8460  | 41,47  | 100        |
| chr4 | 72332118 | 72332318 | SLC4A4 | NM_001134742 | 25 | 24 | 13    | 134     | 574  | 23320 | 116,02 | 100        |
| chr4 | 72338384 | 72338904 | SLC4A4 | NM_001134742 | 25 | 24 | 14    | 272     | 1214 | 57718 | 110,78 | 100        |
| chr4 | 72352656 | 72352874 | SLC4A4 | NM_001134742 | 25 | 24 | 15    | 71      | 149  | 6873  | 31,38  | 100        |
| chr4 | 72363213 | 72363401 | SLC4A4 | NM_001134742 | 25 | 24 | 16    | 192     | 668  | 26658 | 141,05 | 95,8       |
| chr4 | 72397768 | 72397965 | SLC4A4 | NM_001134742 | 25 | 24 | 17    | 114     | 388  | 16986 | 85,79  | 100        |
| chr4 | 72399882 | 72400100 | SLC4A4 | NM_001134742 | 25 | 24 | 18    | 162     | 280  | 11730 | 53,56  | 96,9       |
| chr4 | 72411998 | 72412198 | SLC4A4 | NM_001134742 | 25 | 24 | 19    | 179     | 798  | 34650 | 172,39 | 73,7       |
| chr4 | 72413297 | 72413500 | SLC4A4 | NM_001134742 | 25 | 24 | 20    | 73      | 331  | 14038 | 68,81  | 100        |
| chr4 | 72420805 | 72420987 | SLC4A4 | NM_001134742 | 25 | 24 | 21    | 69      | 461  | 20346 | 111,18 | 100        |
| chr4 | 72423481 | 72423669 | SLC4A4 | NM_001134742 | 25 | 24 | 22    | 174     | 625  | 28276 | 149,61 | 70,1       |
| chr4 | 72425778 | 72425984 | SLC4A4 | NM_001134742 | 25 | 24 | 23    | 162     | 159  | 6488  | 31,34  | 100        |
| chr4 | 72432695 | 72432886 | SLC4A4 | NM_001134742 | 25 | 24 | 24    | 80      | 562  | 22811 | 118,81 | 100        |
| chr4 | 72433498 | 72433674 | SLC4A4 | NM_001134742 | 25 | 24 | 25    | 106     | 242  | 10729 | 60,62  | 100        |
| chr4 | 78979008 | 78979226 | FRAS1  | NM_025074    | 74 | 74 | 1     | 76      | 144  | 6667  | 30,44  | 82,9       |
| chr4 | 78987024 | 78987239 | FRAS1  | NM_025074    | 74 | 74 | 2     | 32      | 349  | 14544 | 67,33  | 100        |
| chr4 | 79158605 | 79158829 | FRAS1  | NM_025074    | 74 | 74 | 3     | 108     | 567  | 23498 | 104,44 | 100        |
| chr4 | 79166286 | 79166492 | FRAS1  | NM_025074    | 74 | 74 | 4     | 93      | 397  | 16324 | 78,86  | 100        |
| chr4 | 79173453 | 79173671 | FRAS1  | NM_025074    | 74 | 74 | 5     | 160     | 370  | 16026 | 73,18  | 78,8       |
| chr4 | 79176422 | 79176634 | FRAS1  | NM_025074    | 74 | 74 | 6     | 134     | 288  | 12628 | 59,29  | 80,6       |
| chr4 | 79186057 | 79186248 | FRAS1  | NM_025074    | 74 | 74 | 7     | 84      | 236  | 10439 | 54,37  | 83,3       |
| chr4 | 79187893 | 79188066 | FRAS1  | NM_025074    | 74 | 74 | 8     | 102     | 175  | 7658  | 44,01  | 77,5       |
| chr4 | 79188423 | 79188629 | FRAS1  | NM_025074    | 74 | 74 | 9     | 192     | 734  | 31886 | 154,04 | 85,4       |
| chr4 | 79199708 | 79199893 | FRAS1  | NM_025074    | 74 | 74 | 10    | 90      | 1056 | 46813 | 251,68 | 94,4       |
| chr4 | 79202499 | 79202711 | FRAS1  | NM_025074    | 74 | 74 | 11    | 36      | 79   | 3154  | 14,81  | 100        |
| chr4 | 79203875 | 79204075 | FRAS1  | NM_025074    | 74 | 74 | 12    | 148     | 169  | 6867  | 34,16  | 68,9       |
| chr4 | 79205482 | 79205658 | FRAS1  | NM_025074    | 74 | 74 | 13    | 144     | 1158 | 50555 | 285,62 | 69,4       |
| chr4 | 79207465 | 79207653 | FRAS1  | NM_025074    | 74 | 74 | 14    | 135     | 284  | 11929 | 63,12  | 70,4       |
| chr4 | 79229122 | 79229319 | FRAS1  | NM_025074    | 74 | 74 | 15    | 144     | 159  | 6958  | 35,14  | 69,4       |
| chr4 | 79236651 | 79236848 | FRAS1  | NM_025074    | 74 | 74 | 16    | 141     | 1321 | 58511 | 295,51 | 71,6       |
| chr4 | 79238566 | 79238748 | FRAS1  | NM_025074    | 74 | 74 | 17    | 141     | 435  | 17730 | 96,89  | 68,8       |
| chr4 | 79239882 | 79240103 | FRAS1  | NM_025074    | 74 | 74 | 18    | 177     | 131  | 5428  | 24,45  | 79,1       |
| chr4 | 79254458 | 79254658 | FRAS1  | NM_025074    | 74 | 74 | 19    | 141     | 544  | 21649 | 107,71 | 77,3       |
| chr4 | 79258883 | 79259092 | FRAS1  | NM_025074    | 74 | 74 | 20    | 144     | 945  | 41930 | 199,67 | 61,8       |
| chr4 | 79284699 | 79284905 | FRAS1  | NM_025074    | 74 | 74 | 21    | 153     | 235  | 10814 | 52,24  | 79,1       |

|      |          |          |       |           |    |    |    |     |      |       |        |      |
|------|----------|----------|-------|-----------|----|----|----|-----|------|-------|--------|------|
| chr4 | 79285103 | 79285300 | FRAS1 | NM_025074 | 74 | 74 | 22 | 147 | 449  | 19397 | 97,96  | 72,1 |
| chr4 | 79291039 | 79291215 | FRAS1 | NM_025074 | 74 | 74 | 23 | 147 | 1315 | 55948 | 316,09 | 68   |
| chr4 | 79293769 | 79293966 | FRAS1 | NM_025074 | 74 | 74 | 24 | 141 | 59   | 2265  | 11,44  | 67,4 |
| chr4 | 79295309 | 79295503 | FRAS1 | NM_025074 | 74 | 74 | 25 | 141 | 126  | 5129  | 26,3   | 68,8 |
| chr4 | 79296928 | 79297116 | FRAS1 | NM_025074 | 74 | 74 | 26 | 141 | 503  | 21940 | 116,08 | 75,2 |
| chr4 | 79300820 | 79301109 | FRAS1 | NM_025074 | 74 | 74 | 27 | 271 | 1499 | 68195 | 235,16 | 84,9 |
| chr4 | 79305196 | 79305375 | FRAS1 | NM_025074 | 74 | 74 | 28 | 85  | 277  | 10986 | 61,03  | 100  |
| chr4 | 79308436 | 79308826 | FRAS1 | NM_025074 | 74 | 74 | 29 | 327 | 1303 | 60825 | 155,56 | 91,1 |
| chr4 | 79321852 | 79322073 | FRAS1 | NM_025074 | 74 | 74 | 30 | 154 | 181  | 8095  | 36,46  | 100  |
| chr4 | 79328730 | 79328945 | FRAS1 | NM_025074 | 74 | 74 | 31 | 179 | 484  | 20439 | 94,63  | 72,1 |
| chr4 | 79334011 | 79334226 | FRAS1 | NM_025074 | 74 | 74 | 32 | 117 | 535  | 21817 | 101    | 88,9 |
| chr4 | 79340026 | 79340244 | FRAS1 | NM_025074 | 74 | 74 | 33 | 115 | 530  | 24544 | 112,07 | 100  |
| chr4 | 79342910 | 79343119 | FRAS1 | NM_025074 | 74 | 74 | 34 | 138 | 633  | 28165 | 134,12 | 74,6 |
| chr4 | 79345388 | 79345582 | FRAS1 | NM_025074 | 74 | 74 | 35 | 33  | 415  | 18676 | 95,77  | 100  |
| chr4 | 79350289 | 79350489 | FRAS1 | NM_025074 | 74 | 74 | 36 | 132 | 231  | 9809  | 48,8   | 69,7 |
| chr4 | 79351378 | 79351563 | FRAS1 | NM_025074 | 74 | 74 | 37 | 126 | 316  | 13343 | 71,74  | 93,7 |
| chr4 | 79353461 | 79353741 | FRAS1 | NM_025074 | 74 | 74 | 38 | 248 | 420  | 19819 | 70,53  | 93,1 |
| chr4 | 79359673 | 79359861 | FRAS1 | NM_025074 | 74 | 74 | 39 | 149 | 1202 | 52985 | 280,34 | 92,6 |
| chr4 | 79360066 | 79360266 | FRAS1 | NM_025074 | 74 | 74 | 40 | 163 | 725  | 30147 | 149,99 | 93,9 |
| chr4 | 79362238 | 79362411 | FRAS1 | NM_025074 | 74 | 74 | 41 | 136 | 134  | 5230  | 30,06  | 70,6 |
| chr4 | 79366633 | 79367058 | FRAS1 | NM_025074 | 74 | 74 | 42 | 191 | 1725 | 81278 | 190,79 | 100  |
| chr4 | 79367738 | 79368024 | FRAS1 | NM_025074 | 74 | 74 | 43 | 154 | 262  | 11531 | 40,18  | 93,5 |
| chr4 | 79369138 | 79369433 | FRAS1 | NM_025074 | 74 | 74 | 44 | 264 | 202  | 9538  | 32,22  | 86   |
| chr4 | 79371234 | 79371452 | FRAS1 | NM_025074 | 74 | 74 | 45 | 189 | 2146 | 91904 | 419,65 | 78,3 |
| chr4 | 79372855 | 79373055 | FRAS1 | NM_025074 | 74 | 74 | 46 | 120 | 443  | 20175 | 100,37 | 100  |
| chr4 | 79373261 | 79373461 | FRAS1 | NM_025074 | 74 | 74 | 47 | 180 | 478  | 19626 | 97,64  | 73,9 |
| chr4 | 79385076 | 79385276 | FRAS1 | NM_025074 | 74 | 74 | 48 | 125 | 105  | 4547  | 22,62  | 81,6 |
| chr4 | 79385503 | 79385709 | FRAS1 | NM_025074 | 74 | 74 | 49 | 141 | 1136 | 48651 | 235,03 | 80,1 |
| chr4 | 79387401 | 79387678 | FRAS1 | NM_025074 | 74 | 74 | 50 | 228 | 1523 | 66802 | 240,29 | 82,9 |
| chr4 | 79391022 | 79391213 | FRAS1 | NM_025074 | 74 | 74 | 51 | 114 | 1384 | 62842 | 327,3  | 71,9 |
| chr4 | 79393245 | 79393433 | FRAS1 | NM_025074 | 74 | 74 | 52 | 151 | 651  | 27687 | 146,49 | 66,2 |
| chr4 | 79394574 | 79394771 | FRAS1 | NM_025074 | 74 | 74 | 53 | 160 | 716  | 31551 | 159,35 | 100  |
| chr4 | 79396503 | 79396700 | FRAS1 | NM_025074 | 74 | 74 | 54 | 169 | 292  | 12844 | 64,87  | 64,5 |
| chr4 | 79399005 | 79399294 | FRAS1 | NM_025074 | 74 | 74 | 55 | 247 | 438  | 20452 | 70,52  | 85,4 |
| chr4 | 79400459 | 79400807 | FRAS1 | NM_025074 | 74 | 74 | 56 | 345 | 2023 | 89854 | 257,46 | 81,2 |
| chr4 | 79402877 | 79403068 | FRAS1 | NM_025074 | 74 | 74 | 57 | 161 | 1274 | 52995 | 276,02 | 68,9 |
| chr4 | 79403581 | 79403766 | FRAS1 | NM_025074 | 74 | 74 | 58 | 148 | 139  | 5878  | 31,6   | 73,6 |
| chr4 | 79410106 | 79410288 | FRAS1 | NM_025074 | 74 | 74 | 59 | 206 | 514  | 22870 | 124,97 | 62,6 |
| chr4 | 79417927 | 79418151 | FRAS1 | NM_025074 | 74 | 74 | 60 | 157 | 374  | 16389 | 72,84  | 100  |
| chr4 | 79420931 | 79421146 | FRAS1 | NM_025074 | 74 | 74 | 61 | 201 | 205  | 8977  | 41,56  | 72,1 |
| chr4 | 79428523 | 79428699 | FRAS1 | NM_025074 | 74 | 74 | 62 | 188 | 622  | 27170 | 153,5  | 66,5 |
| chr4 | 79429825 | 79430102 | FRAS1 | NM_025074 | 74 | 74 | 63 | 276 | 1201 | 56541 | 203,38 | 79   |
| chr4 | 79432350 | 79432645 | FRAS1 | NM_025074 | 74 | 74 | 64 | 233 | 515  | 22259 | 75,2   | 93,6 |
| chr4 | 79434459 | 79434653 | FRAS1 | NM_025074 | 74 | 74 | 65 | 161 | 908  | 36772 | 188,57 | 67,1 |
| chr4 | 79437004 | 79437174 | FRAS1 | NM_025074 | 74 | 74 | 66 | 215 | 607  | 25120 | 146,9  | 76,3 |
| chr4 | 79440519 | 79440719 | FRAS1 | NM_025074 | 74 | 74 | 67 | 151 | 674  | 27364 | 136,14 | 77,5 |
| chr4 | 79442603 | 79442815 | FRAS1 | NM_025074 | 74 | 74 | 68 | 108 | 298  | 12959 | 60,84  | 100  |
| chr4 | 79443770 | 79443970 | FRAS1 | NM_025074 | 74 | 74 | 69 | 160 | 389  | 16840 | 83,78  | 100  |
| chr4 | 79447577 | 79447783 | FRAS1 | NM_025074 | 74 | 74 | 70 | 117 | 430  | 18650 | 90,1   | 76,1 |
| chr4 | 79455570 | 79455785 | FRAS1 | NM_025074 | 74 | 74 | 71 | 167 | 628  | 27606 | 127,81 | 100  |
| chr4 | 79458130 | 79458306 | FRAS1 | NM_025074 | 74 | 74 | 72 | 206 | 208  | 8681  | 49,05  | 76,7 |
| chr4 | 79460393 | 79460593 | FRAS1 | NM_025074 | 74 | 74 | 73 | 147 | 653  | 28363 | 141,11 | 99,3 |
| chr4 | 79461765 | 79462341 | FRAS1 | NM_025074 | 74 | 74 | 74 | 594 | 1088 | 52185 | 90,44  | 86,5 |
| chr4 | 84185231 | 84185606 | COQ2  | NM_015697 | 7  | 7  | 7  | 165 | 145  | 6706  | 17,84  | 100  |
| chr4 | 84188804 | 84188977 | COQ2  | NM_015697 | 7  | 7  | 6  | 189 | 569  | 23177 | 133,2  | 65,6 |
| chr4 | 84191005 | 84191208 | COQ2  | NM_015697 | 7  | 7  | 5  | 134 | 176  | 8132  | 39,86  | 100  |
| chr4 | 84193196 | 84193369 | COQ2  | NM_015697 | 7  | 7  | 4  | 86  | 183  | 7612  | 43,75  | 100  |

|      |           |           |        |              |    |    |          |                |      |       |        |                       |
|------|-----------|-----------|--------|--------------|----|----|----------|----------------|------|-------|--------|-----------------------|
| chr4 | 84194608  | 84194811  | COQ2   | NM_015697    | 7  | 7  | 3        | 122            | 255  | 10687 | 52,39  | 100                   |
| chr4 | 84200077  | 84200295  | COQ2   | NM_015697    | 7  | 7  | 2        | 167            | 144  | 6533  | 29,83  | 100                   |
| chr4 | 84205693  | 84206142  | COQ2   | NM_015697    | 7  | 7  | 1        | 403            | 481  | 23056 | 51,24  | 93,1                  |
| chr4 | 103553134 | 103553494 | MANBA  | NM_005908    | 17 | 17 | 17       | 225            | 151  | 6950  | 19,25  | 100                   |
| chr4 | 103555993 | 103556285 | MANBA  | NM_005908    | 17 | 17 | 16       | 258            | 2139 | 98688 | 336,82 | 81,4                  |
| chr4 | 103556995 | 103557192 | MANBA  | NM_005908    | 17 | 17 | 15       | 143            | 456  | 20218 | 102,11 | 100                   |
| chr4 | 103560916 | 103561098 | MANBA  | NM_005908    | 17 | 17 | 14       | 145            | 708  | 31404 | 171,61 | 68,3                  |
| chr4 | 103571651 | 103571836 | MANBA  | NM_005908    | 17 | 17 | 13       | 165            | 166  | 7449  | 40,05  | 86,7                  |
| chr4 | 103578822 | 103579096 | MANBA  | NM_005908    | 17 | 17 | 12       | 219            | 505  | 23432 | 85,21  | 100                   |
| chr4 | 103585825 | 103586013 | MANBA  | NM_005908    | 17 | 17 | 11       | 168            | 248  | 9885  | 52,3   | 100                   |
| chr4 | 103590062 | 103590262 | MANBA  | NM_005908    | 17 | 17 | 10       | 87             | 164  | 7101  | 35,33  | 100                   |
| chr4 | 103592336 | 103592539 | MANBA  | NM_005908    | 17 | 17 | 9        | 118            | 1317 | 54480 | 267,06 | 86,4                  |
| chr4 | 103595000 | 103595194 | MANBA  | NM_005908    | 17 | 17 | 8        | 152            | 172  | 6875  | 35,26  | 78,3                  |
| chr4 | 103610715 | 103610903 | MANBA  | NM_005908    | 17 | 17 | 7        | 111            | 157  | 6972  | 36,89  | 100                   |
| chr4 | 103611728 | 103611949 | MANBA  | NM_005908    | 17 | 17 | 6        | 176            | 221  | 10059 | 45,31  | 100                   |
| chr4 | 103635574 | 103635774 | MANBA  | NM_005908    | 17 | 17 | 5        | 124            | 261  | 12220 | 60,8   | 100                   |
| chr4 | 103644087 | 103644272 | MANBA  | NM_005908    | 17 | 17 | 4        | 171            | 455  | 19467 | 104,66 | 65,5                  |
| chr4 | 103644974 | 103645165 | MANBA  | NM_005908    | 17 | 17 | 3        | 106            | 79   | 3611  | 18,81  | 100                   |
| chr4 | 103647683 | 103647889 | MANBA  | NM_005908    | 17 | 17 | 2        | 95             | 14   | 613   | 2,96   | 100                   |
| chr4 | 103681871 | 103682151 | MANBA  | NM_005908    | 17 | 17 | 1        | 177            | 46   | 2091  | 7,44   | 100                   |
| chr4 | 107237562 | 107237732 | AIMP1  | NM_001142416 | 7  | 7  | 1        | 47             | 592  | 23080 | 134,97 | 59,6                  |
| chr4 | 107246181 | 107246363 | AIMP1  | NM_001142416 | 7  | 7  | 2        | 134            | 86   | 3845  | 21,01  | 70,9                  |
| chr4 | 107248609 | 107248821 | AIMP1  | NM_001142416 | 7  | 7  | 3        | 114            | 130  | 5436  | 25,52  | 99,1                  |
| chr4 | 107249240 | 107249446 | AIMP1  | NM_001142416 | 7  | 7  | 4        | 168            | 197  | 8263  | 39,92  | 95,8                  |
| chr4 | 107252804 | 107253004 | AIMP1  | NM_001142416 | 7  | 7  | 5        | 212            | 538  | 23750 | 118,16 | 83                    |
| chr4 | 107258084 | 107258254 | AIMP1  | NM_001142416 | 7  | 7  | 6        | 169            | 385  | 15178 | 88,76  | 65,7                  |
| chr4 | 107268617 | 107268971 | AIMP1  | NM_001142416 | 7  | 7  | 7        | 167            | 498  | 21180 | 59,66  | 100                   |
| chr4 | 113565524 | 113566041 | LARP7  | NM_016648    | 13 | 12 | 2        | 202            | 327  | 14785 | 28,54  | 100                   |
| chr4 | 113567493 | 113567903 | LARP7  | NM_016648    | 13 | 12 | 3,4      | 101,84         | 298  | 13769 | 33,5   | 100.0,100.0           |
| chr4 | 113567973 | 113568863 | LARP7  | NM_016648    | 13 | 12 | 5,6,7,8  | 165,94,351,145 | 603  | 28655 | 32,16  | 84.2,100.0,100.0,12.4 |
| chr4 | 113568933 | 113569678 | LARP7  | NM_016648    | 13 | 12 | 8        | 145            | 689  | 30892 | 41,41  | 40                    |
| chr4 | 113570591 | 113570809 | LARP7  | NM_016648    | 13 | 12 | 9        | 152            | 79   | 3528  | 16,11  | 78,3                  |
| chr4 | 113571526 | 113571702 | LARP7  | NM_016648    | 13 | 12 | 10       | 122            | 508  | 22056 | 124,61 | 70,5                  |
| chr4 | 113574287 | 113574475 | LARP7  | NM_016648    | 13 | 12 | 11       | 160            | 113  | 4839  | 25,6   | 66,2                  |
| chr4 | 113575196 | 113575402 | LARP7  | NM_016648    | 13 | 12 | 12       | 92             | 185  | 8001  | 38,65  | 100                   |
| chr4 | 113578427 | 113578612 | LARP7  | NM_016648    | 13 | 12 | 13       | 81             | 341  | 13945 | 74,97  | 70,4                  |
| chr4 | 119203016 | 119203456 | PRSS12 | NM_003619    | 13 | 13 | 13       | 308            | 1419 | 67318 | 152,65 | 100                   |
| chr4 | 119204060 | 119204337 | PRSS12 | NM_003619    | 13 | 13 | 12       | 281            | 1104 | 47116 | 169,48 | 73,7                  |
| chr4 | 119216123 | 119216314 | PRSS12 | NM_003619    | 13 | 13 | 11       | 123            | 272  | 11449 | 59,63  | 76,4                  |
| chr4 | 119216892 | 119217113 | PRSS12 | NM_003619    | 13 | 13 | 10       | 79             | 164  | 7303  | 32,9   | 100                   |
| chr4 | 119219833 | 119220030 | PRSS12 | NM_003619    | 13 | 13 | 9        | 206            | 762  | 32884 | 166,08 | 69,4                  |
| chr4 | 119229537 | 119229746 | PRSS12 | NM_003619    | 13 | 13 | 8        | 142            | 1509 | 64349 | 306,42 | 100                   |
| chr4 | 119234425 | 119234616 | PRSS12 | NM_003619    | 13 | 13 | 7        | 197            | 181  | 7336  | 38,21  | 65                    |
| chr4 | 119237322 | 119237549 | PRSS12 | NM_003619    | 13 | 13 | 6        | 142            | 1030 | 45118 | 197,89 | 100                   |
| chr4 | 119239563 | 119239760 | PRSS12 | NM_003619    | 13 | 13 | 5        | 179            | 293  | 13240 | 66,87  | 83,2                  |
| chr4 | 119252782 | 119252976 | PRSS12 | NM_003619    | 13 | 13 | 4        | 151            | 424  | 17904 | 91,82  | 70,2                  |
| chr4 | 119256580 | 119256801 | PRSS12 | NM_003619    | 13 | 13 | 3        | 179            | 617  | 26441 | 119,1  | 97,2                  |
| chr4 | 119259362 | 119259544 | PRSS12 | NM_003619    | 13 | 13 | 2        | 139            | 564  | 24979 | 136,5  | 77,7                  |
| chr4 | 119273272 | 119273958 | PRSS12 | NM_003619    | 13 | 13 | 1        | 502            | 461  | 20885 | 30,4   | 100                   |
| chr4 | 122746914 | 122747179 | BBS7   | NM_176824    | 19 | 19 | 19       | 134            | 436  | 19612 | 73,73  | 100                   |
| chr4 | 122749177 | 122749940 | BBS7   | NM_176824    | 19 | 19 | 18,17,16 | 124.104.110    | 1478 | 72260 | 94,58  | 100.0,100.0,100.0     |
| chr4 | 122754394 | 122754612 | BBS7   | NM_176824    | 19 | 19 | 15       | 165            | 297  | 12399 | 56,62  | 95,2                  |
| chr4 | 122756268 | 122756474 | BBS7   | NM_176824    | 19 | 19 | 14       | 140            | 390  | 17177 | 82,98  | 100                   |
| chr4 | 122760727 | 122760915 | BBS7   | NM_176824    | 19 | 19 | 13       | 66             | 293  | 12826 | 67,86  | 100                   |
| chr4 | 122764994 | 122765194 | BBS7   | NM_176824    | 19 | 19 | 12       | 75             | 35   | 1559  | 7,76   | 100                   |
| chr4 | 122766681 | 122766869 | BBS7   | NM_176824    | 19 | 19 | 11       | 193            | 508  | 20691 | 109,48 | 88,6                  |
| chr4 | 122768545 | 122768748 | BBS7   | NM_176824    | 19 | 19 | 10       | 103            | 523  | 24656 | 120,86 | 100                   |

|      |           |           |       |              |    |    |     |        |      |        |        |             |
|------|-----------|-----------|-------|--------------|----|----|-----|--------|------|--------|--------|-------------|
| chr4 | 122769955 | 122770131 | BBS7  | NM_176824    | 19 | 19 | 9   | 85     | 504  | 20435  | 115,45 | 100         |
| chr4 | 122774090 | 122774275 | BBS7  | NM_176824    | 19 | 19 | 8   | 131    | 1360 | 57442  | 308,83 | 100         |
| chr4 | 122775822 | 122776004 | BBS7  | NM_176824    | 19 | 19 | 7   | 117    | 699  | 29401  | 160,66 | 100         |
| chr4 | 122776582 | 122776776 | BBS7  | NM_176824    | 19 | 19 | 6   | 73     | 214  | 9177   | 47,06  | 100         |
| chr4 | 122780115 | 122780324 | BBS7  | NM_176824    | 19 | 19 | 5   | 187    | 645  | 28559  | 136    | 95,2        |
| chr4 | 122782624 | 122782892 | BBS7  | NM_176824    | 19 | 19 | 4   | 176    | 385  | 16274  | 60,5   | 100         |
| chr4 | 122784317 | 122784490 | BBS7  | NM_176824    | 19 | 19 | 3   | 63     | 491  | 21065  | 121,06 | 100         |
| chr4 | 122789047 | 122789232 | BBS7  | NM_176824    | 19 | 19 | 2   | 66     | 420  | 16812  | 90,39  | 100         |
| chr4 | 122791353 | 122791606 | BBS7  | NM_176824    | 19 | 19 | 1   | 36     | 207  | 8402   | 33,08  | 100         |
| chr4 | 123663021 | 123665215 | BBS12 | NM_001178007 | 3  | 1  | 3   | 2133   | 5723 | 278135 | 126,71 | 100         |
| chr4 | 146560189 | 146560706 | MMAA  | NM_172250    | 7  | 6  | 2   | 439    | 2582 | 123769 | 238,94 | 94,5        |
| chr4 | 146563484 | 146563675 | MMAA  | NM_172250    | 7  | 6  | 3   | 123    | 586  | 25118  | 130,82 | 100         |
| chr4 | 146567050 | 146567395 | MMAA  | NM_172250    | 7  | 6  | 4   | 171    | 698  | 32013  | 92,52  | 100         |
| chr4 | 146572162 | 146572341 | MMAA  | NM_172250    | 7  | 6  | 5   | 86     | 45   | 1774   | 9,86   | 100         |
| chr4 | 146575141 | 146575350 | MMAA  | NM_172250    | 7  | 6  | 6   | 150    | 1376 | 56786  | 270,41 | 100         |
| chr4 | 146576257 | 146576694 | MMAA  | NM_172250    | 7  | 6  | 7   | 288    | 530  | 23642  | 53,98  | 100         |
| chr4 | 178352695 | 178353055 | AGA   | NM_000027    | 9  | 9  | 9   | 101    | 1530 | 72332  | 200,37 | 100         |
| chr4 | 178354367 | 178354567 | AGA   | NM_000027    | 9  | 9  | 8   | 134    | 1128 | 50930  | 253,38 | 100         |
| chr4 | 178355477 | 178355704 | AGA   | NM_000027    | 9  | 9  | 7   | 108    | 518  | 22190  | 97,32  | 100         |
| chr4 | 178357340 | 178357522 | AGA   | NM_000027    | 9  | 9  | 6   | 76     | 158  | 6963   | 38,05  | 100         |
| chr4 | 178358527 | 178358715 | AGA   | NM_000027    | 9  | 9  | 5   | 115    | 129  | 5322   | 28,16  | 100         |
| chr4 | 178359785 | 178359997 | AGA   | NM_000027    | 9  | 9  | 4   | 113    | 218  | 8451   | 39,68  | 87,6        |
| chr4 | 178360709 | 178360921 | AGA   | NM_000027    | 9  | 9  | 3   | 113    | 501  | 22938  | 107,69 | 100         |
| chr4 | 178361343 | 178361528 | AGA   | NM_000027    | 9  | 9  | 2   | 154    | 696  | 29395  | 158,04 | 66,2        |
| chr4 | 178363400 | 178363662 | AGA   | NM_000027    | 9  | 9  | 1   | 127    | 366  | 17069  | 64,9   | 100         |
| chr5 | 218353    | 218473    | SDHA  | NM_004168    | 15 | 15 | 1   | 63     | 1    | 50     | 0,41   | 4,8         |
| chr5 | 225660    | 225780    | SDHA  | NM_004168    | 15 | 15 | 4   | 144    | 11   | 410    | 3,39   | 12,5        |
| chr5 | 226104    | 226224    | SDHA  | NM_004168    | 15 | 15 | 5   | 165    | 145  | 4719   | 39     | 35,8        |
| chr5 | 228425    | 228545    | SDHA  | NM_004168    | 15 | 15 | 6   | 149    | 25   | 822    | 6,79   | 16,1        |
| chr5 | 230877    | 230997    | SDHA  | NM_004168    | 15 | 15 | 7   | 125    | 78   | 2574   | 21,27  | 5,6         |
| chr5 | 233500    | 233620    | SDHA  | NM_004168    | 15 | 15 | 8   | 169    | 170  | 5156   | 42,61  | 17,2        |
| chr5 | 235412    | 235606    | SDHA  | NM_004168    | 15 | 15 | 9   | 196    | 103  | 4558   | 23,37  | 21,9        |
| chr5 | 6599904   | 6600424   | NSUN2 | NM_017755    | 19 | 19 | 19  | 307    | 2814 | 133928 | 257,06 | 100         |
| chr5 | 6602562   | 6602753   | NSUN2 | NM_017755    | 19 | 19 | 18  | 40     | 254  | 11569  | 60,26  | 100         |
| chr5 | 6604147   | 6604350   | NSUN2 | NM_017755    | 19 | 19 | 17  | 139    | 677  | 29269  | 143,48 | 71,9        |
| chr5 | 6604703   | 6604879   | NSUN2 | NM_017755    | 19 | 19 | 16  | 81     | 466  | 20959  | 118,41 | 100         |
| chr5 | 6605413   | 6605607   | NSUN2 | NM_017755    | 19 | 19 | 15  | 136    | 351  | 14717  | 75,47  | 80,1        |
| chr5 | 6606950   | 6607132   | NSUN2 | NM_017755    | 19 | 19 | 14  | 93     | 258  | 10999  | 60,1   | 81,7        |
| chr5 | 6607244   | 6607444   | NSUN2 | NM_017755    | 19 | 19 | 13  | 185    | 2036 | 93893  | 467,13 | 71,4        |
| chr5 | 6609811   | 6610038   | NSUN2 | NM_017755    | 19 | 19 | 12  | 97     | 84   | 3795   | 16,64  | 100         |
| chr5 | 6611107   | 6611307   | NSUN2 | NM_017755    | 19 | 19 | 11  | 131    | 355  | 14602  | 72,65  | 70,2        |
| chr5 | 6611735   | 6611959   | NSUN2 | NM_017755    | 19 | 19 | 10  | 74     | 209  | 9252   | 41,12  | 100         |
| chr5 | 6616753   | 6616929   | NSUN2 | NM_017755    | 19 | 19 | 9   | 131    | 467  | 19401  | 109,61 | 68,7        |
| chr5 | 6618011   | 6618196   | NSUN2 | NM_017755    | 19 | 19 | 8   | 75     | 109  | 4480   | 24,09  | 100         |
| chr5 | 6620169   | 6620342   | NSUN2 | NM_017755    | 19 | 19 | 7   | 193    | 860  | 32107  | 184,52 | 64,2        |
| chr5 | 6622052   | 6622246   | NSUN2 | NM_017755    | 19 | 19 | 6   | 85     | 360  | 15902  | 81,55  | 100         |
| chr5 | 6623223   | 6623438   | NSUN2 | NM_017755    | 19 | 19 | 5   | 72     | 64   | 2592   | 12     | 100         |
| chr5 | 6625680   | 6625877   | NSUN2 | NM_017755    | 19 | 19 | 4   | 106    | 426  | 17987  | 90,84  | 97,2        |
| chr5 | 6631907   | 6632113   | NSUN2 | NM_017755    | 19 | 19 | 3   | 105    | 417  | 17868  | 86,32  | 100         |
| chr5 | 6632617   | 6633158   | NSUN2 | NM_017755    | 19 | 19 | 2,1 | 158,96 | 775  | 35062  | 64,69  | 100.0,100.0 |
| chr5 | 7869108   | 7869394   | MTRR  | NM_024010    | 15 | 15 | 1   | 56     | 80   | 3740   | 13,03  | 100         |
| chr5 | 7870835   | 7871035   | MTRR  | NM_024010    | 15 | 15 | 2   | 154    | 242  | 10571  | 52,59  | 99,4        |
| chr5 | 7873477   | 7873701   | MTRR  | NM_024010    | 15 | 15 | 3   | 154    | 614  | 27140  | 120,62 | 100         |
| chr5 | 7875344   | 7875571   | MTRR  | NM_024010    | 15 | 15 | 4   | 118    | 508  | 22918  | 100,52 | 100         |
| chr5 | 7878010   | 7878477   | MTRR  | NM_024010    | 15 | 15 | 5   | 379    | 1314 | 59468  | 127,07 | 100         |
| chr5 | 7883183   | 7883395   | MTRR  | NM_024010    | 15 | 15 | 6   | 123    | 405  | 17255  | 81,01  | 100         |
| chr5 | 7885778   | 7885984   | MTRR  | NM_024010    | 15 | 15 | 7   | 154    | 263  | 11551  | 55,8   | 100         |

|      |          |          |       |           |    |    |       |         |      |       |        |            |
|------|----------|----------|-------|-----------|----|----|-------|---------|------|-------|--------|------------|
| chr5 | 7886635  | 7886835  | MTRR  | NM_024010 | 15 | 15 | 8     | 89      | 351  | 15305 | 76,14  | 100        |
| chr5 | 7889134  | 7889322  | MTRR  | NM_024010 | 15 | 15 | 9     | 181     | 243  | 10363 | 54,83  | 63,5       |
| chr5 | 7891480  | 7891674  | MTRR  | NM_024010 | 15 | 15 | 10    | 43      | 482  | 21962 | 112,63 | 100        |
| chr5 | 7892799  | 7892987  | MTRR  | NM_024010 | 15 | 15 | 11    | 187     | 724  | 30286 | 160,24 | 79,1       |
| chr5 | 7895805  | 7896017  | MTRR  | NM_024010 | 15 | 15 | 12    | 119     | 331  | 14634 | 68,7   | 100        |
| chr5 | 7896882  | 7897313  | MTRR  | NM_024010 | 15 | 15 | 13,14 | 93.183  | 1158 | 52325 | 121,12 | 100.0,74.3 |
| chr5 | 7899950  | 7900310  | MTRR  | NM_024010 | 15 | 15 | 15    | 145     | 237  | 10598 | 29,36  | 100        |
| chr5 | 14711158 | 14711426 | ANKH  | NM_054027 | 12 | 12 | 12    | 114     | 1228 | 56465 | 209,91 | 100        |
| chr5 | 14712998 | 14713204 | ANKH  | NM_054027 | 12 | 12 | 11    | 100     | 640  | 27326 | 132,01 | 85         |
| chr5 | 14713545 | 14713751 | ANKH  | NM_054027 | 12 | 12 | 10    | 124     | 338  | 14930 | 72,13  | 79,8       |
| chr5 | 14716746 | 14716964 | ANKH  | NM_054027 | 12 | 12 | 9     | 130     | 656  | 27598 | 126,02 | 100        |
| chr5 | 14741817 | 14742008 | ANKH  | NM_054027 | 12 | 12 | 8     | 96      | 1046 | 45889 | 239,01 | 76         |
| chr5 | 14745855 | 14746049 | ANKH  | NM_054027 | 12 | 12 | 7     | 93      | 813  | 36667 | 188,04 | 76,3       |
| chr5 | 14749319 | 14749495 | ANKH  | NM_054027 | 12 | 12 | 6     | 135     | 113  | 4821  | 27,24  | 71,9       |
| chr5 | 14751090 | 14751311 | ANKH  | NM_054027 | 12 | 12 | 5     | 171     | 225  | 9639  | 43,42  | 78,4       |
| chr5 | 14755953 | 14756126 | ANKH  | NM_054027 | 12 | 12 | 4     | 84      | 484  | 20509 | 117,87 | 100        |
| chr5 | 14758532 | 14758753 | ANKH  | NM_054027 | 12 | 12 | 3     | 119     | 903  | 39744 | 179,03 | 100        |
| chr5 | 14768982 | 14769277 | ANKH  | NM_054027 | 12 | 12 | 2     | 217     | 830  | 38205 | 129,07 | 89,4       |
| chr5 | 14871077 | 14871686 | ANKH  | NM_054027 | 12 | 12 | 1     | 96      | 884  | 40021 | 65,61  | 100        |
| chr5 | 36953688 | 36953906 | NIPBL | NM_133433 | 47 | 46 | 2     | 64      | 267  | 10978 | 50,13  | 100        |
| chr5 | 36955544 | 36955762 | NIPBL | NM_133433 | 47 | 46 | 3     | 166     | 680  | 29028 | 132,55 | 100        |
| chr5 | 36958154 | 36958375 | NIPBL | NM_133433 | 47 | 46 | 4     | 128     | 370  | 15942 | 71,81  | 100        |
| chr5 | 36961568 | 36961753 | NIPBL | NM_133433 | 47 | 46 | 5     | 100     | 272  | 11499 | 61,82  | 100        |
| chr5 | 36962170 | 36962376 | NIPBL | NM_133433 | 47 | 46 | 6     | 152     | 614  | 26869 | 129,8  | 100        |
| chr5 | 36970969 | 36971160 | NIPBL | NM_133433 | 47 | 46 | 7     | 161     | 311  | 12838 | 66,86  | 100        |
| chr5 | 36971997 | 36972188 | NIPBL | NM_133433 | 47 | 46 | 8     | 97      | 282  | 12042 | 62,72  | 100        |
| chr5 | 36975826 | 36976500 | NIPBL | NM_133433 | 47 | 46 | 9     | 627     | 1889 | 88316 | 130,84 | 99,4       |
| chr5 | 36984755 | 36986395 | NIPBL | NM_133433 | 47 | 46 | 10    | 1626    | 2015 | 96954 | 59,08  | 99,5       |
| chr5 | 36995708 | 36995899 | NIPBL | NM_133433 | 47 | 46 | 11    | 183     | 336  | 15402 | 80,22  | 96,2       |
| chr5 | 37000488 | 37000718 | NIPBL | NM_133433 | 47 | 46 | 12    | 198     | 399  | 16100 | 69,7   | 93,4       |
| chr5 | 37000879 | 37001147 | NIPBL | NM_133433 | 47 | 46 | 13,14 | 72,90   | 167  | 7083  | 26,33  | 100.0,63.3 |
| chr5 | 37002691 | 37002879 | NIPBL | NM_133433 | 47 | 46 | 15    | 104     | 240  | 11414 | 60,39  | 100        |
| chr5 | 37003350 | 37003520 | NIPBL | NM_133433 | 47 | 46 | 16    | 87      | 85   | 3439  | 20,11  | 100        |
| chr5 | 37006446 | 37006699 | NIPBL | NM_133433 | 47 | 46 | 17    | 232     | 889  | 39071 | 153,82 | 100        |
| chr5 | 37007412 | 37007585 | NIPBL | NM_133433 | 47 | 46 | 18    | 152     | 69   | 2708  | 15,56  | 100        |
| chr5 | 37007980 | 37008195 | NIPBL | NM_133433 | 47 | 46 | 19    | 81      | 363  | 15823 | 73,25  | 100        |
| chr5 | 37008701 | 37008898 | NIPBL | NM_133433 | 47 | 46 | 20    | 101     | 154  | 6459  | 32,62  | 100        |
| chr5 | 37010187 | 37010381 | NIPBL | NM_133433 | 47 | 46 | 21    | 139     | 469  | 20771 | 106,52 | 100        |
| chr5 | 37014725 | 37014910 | NIPBL | NM_133433 | 47 | 46 | 22    | 83      | 168  | 6932  | 37,27  | 100        |
| chr5 | 37016120 | 37016293 | NIPBL | NM_133433 | 47 | 46 | 23    | 133     | 513  | 21328 | 122,57 | 100        |
| chr5 | 37017104 | 37017280 | NIPBL | NM_133433 | 47 | 46 | 24    | 144     | 229  | 9304  | 52,56  | 100        |
| chr5 | 37019399 | 37019587 | NIPBL | NM_133433 | 47 | 46 | 25    | 90      | 394  | 17214 | 91,08  | 100        |
| chr5 | 37020582 | 37021013 | NIPBL | NM_133433 | 47 | 46 | 26,27 | 215.103 | 1027 | 47302 | 109,5  | 90.2,100.0 |
| chr5 | 37022118 | 37022484 | NIPBL | NM_133433 | 47 | 46 | 28,29 | 99.147  | 412  | 19632 | 53,49  | 100.0,94.6 |
| chr5 | 37024635 | 37024817 | NIPBL | NM_133433 | 47 | 46 | 30    | 135     | 163  | 6464  | 35,32  | 97         |
| chr5 | 37026339 | 37026539 | NIPBL | NM_133433 | 47 | 46 | 31    | 99      | 456  | 17946 | 89,28  | 91,9       |
| chr5 | 37027399 | 37027578 | NIPBL | NM_133433 | 47 | 46 | 32    | 54      | 389  | 17528 | 97,38  | 100        |
| chr5 | 37036479 | 37036694 | NIPBL | NM_133433 | 47 | 46 | 33    | 109     | 25   | 859   | 3,98   | 100        |
| chr5 | 37038674 | 37038856 | NIPBL | NM_133433 | 47 | 46 | 34    | 137     | 62   | 2495  | 13,63  | 100        |
| chr5 | 37044479 | 37044925 | NIPBL | NM_133433 | 47 | 46 | 35,36 | 141,94  | 600  | 25562 | 57,19  | 78.7,100.0 |
| chr5 | 37045536 | 37045709 | NIPBL | NM_133433 | 47 | 46 | 37    | 155     | 407  | 17621 | 101,27 | 100        |
| chr5 | 37046167 | 37046352 | NIPBL | NM_133433 | 47 | 46 | 38    | 91      | 125  | 5264  | 28,3   | 100        |
| chr5 | 37048575 | 37048790 | NIPBL | NM_133433 | 47 | 46 | 39    | 174     | 136  | 6148  | 28,46  | 100        |
| chr5 | 37049201 | 37049407 | NIPBL | NM_133433 | 47 | 46 | 40    | 191     | 562  | 23970 | 115,8  | 100        |
| chr5 | 37051830 | 37052003 | NIPBL | NM_133433 | 47 | 46 | 41    | 108     | 208  | 8150  | 46,84  | 100        |
| chr5 | 37052440 | 37052649 | NIPBL | NM_133433 | 47 | 46 | 42    | 201     | 953  | 37764 | 179,83 | 90,5       |
| chr5 | 37057242 | 37057433 | NIPBL | NM_133433 | 47 | 46 | 43    | 147     | 599  | 24620 | 128,23 | 99,3       |

|      |          |          |         |           |    |    |          |             |      |        |        |                   |
|------|----------|----------|---------|-----------|----|----|----------|-------------|------|--------|--------|-------------------|
| chr5 | 37058971 | 37059227 | NIPBL   | NM_133433 | 47 | 46 | 44       | 275         | 389  | 17324  | 67,41  | 85,5              |
| chr5 | 37060992 | 37061195 | NIPBL   | NM_133433 | 47 | 46 | 45       | 175         | 106  | 4708   | 23,08  | 73,7              |
| chr5 | 37063825 | 37064253 | NIPBL   | NM_133433 | 47 | 46 | 46       | 189         | 241  | 11773  | 27,44  | 100               |
| chr5 | 37064570 | 37065075 | NIPBL   | NM_133433 | 47 | 46 | 47       | 366         | 658  | 31456  | 62,17  | 100               |
| chr5 | 37107579 | 37107945 | C5orf42 | NM_023073 | 52 | 51 | 52       | 177         | 251  | 11178  | 30,46  | 100               |
| chr5 | 37108371 | 37108595 | C5orf42 | NM_023073 | 52 | 51 | 51       | 179         | 425  | 18548  | 82,44  | 100               |
| chr5 | 37115018 | 37115206 | C5orf42 | NM_023073 | 52 | 51 | 50       | 90          | 270  | 11673  | 61,76  | 100               |
| chr5 | 37120249 | 37120443 | C5orf42 | NM_023073 | 52 | 51 | 49       | 125         | 595  | 25625  | 131,41 | 100               |
| chr5 | 37121768 | 37121950 | C5orf42 | NM_023073 | 52 | 51 | 48       | 168         | 243  | 10220  | 55,85  | 70,8              |
| chr5 | 37122445 | 37122618 | C5orf42 | NM_023073 | 52 | 51 | 47       | 59          | 757  | 30432  | 174,9  | 100               |
| chr5 | 37125295 | 37125498 | C5orf42 | NM_023073 | 52 | 51 | 46       | 166         | 1013 | 43560  | 213,53 | 92,2              |
| chr5 | 37138758 | 37138955 | C5orf42 | NM_023073 | 52 | 51 | 45       | 129         | 174  | 7594   | 38,35  | 100               |
| chr5 | 37139299 | 37139481 | C5orf42 | NM_023073 | 52 | 51 | 44       | 31          | 280  | 13215  | 72,21  | 100               |
| chr5 | 37142378 | 37142554 | C5orf42 | NM_023073 | 52 | 51 | 43       | 171         | 453  | 18655  | 105,4  | 83,6              |
| chr5 | 37148202 | 37148381 | C5orf42 | NM_023073 | 52 | 51 | 42       | 88          | 1226 | 54441  | 302,45 | 100               |
| chr5 | 37153834 | 37154117 | C5orf42 | NM_023073 | 52 | 51 | 41       | 254         | 1103 | 51018  | 179,64 | 100               |
| chr5 | 37157755 | 37157934 | C5orf42 | NM_023073 | 52 | 51 | 40       | 145         | 727  | 28758  | 159,77 | 100               |
| chr5 | 37158301 | 37158474 | C5orf42 | NM_023073 | 52 | 51 | 39       | 122         | 363  | 16160  | 92,87  | 100               |
| chr5 | 37162550 | 37162741 | C5orf42 | NM_023073 | 52 | 51 | 38       | 102         | 187  | 7554   | 39,34  | 100               |
| chr5 | 37164226 | 37164453 | C5orf42 | NM_023073 | 52 | 51 | 37       | 55          | 253  | 10339  | 45,35  | 100               |
| chr5 | 37165537 | 37165758 | C5orf42 | NM_023073 | 52 | 51 | 36       | 133         | 480  | 21221  | 95,59  | 88,7              |
| chr5 | 37167143 | 37167322 | C5orf42 | NM_023073 | 52 | 51 | 35       | 167         | 424  | 17583  | 97,68  | 100               |
| chr5 | 37168933 | 37169687 | C5orf42 | NM_023073 | 52 | 51 | 34       | 771         | 1772 | 85232  | 112,89 | 94,8              |
| chr5 | 37170156 | 37170424 | C5orf42 | NM_023073 | 52 | 51 | 33       | 291         | 821  | 36194  | 134,55 | 92,4              |
| chr5 | 37173831 | 37174037 | C5orf42 | NM_023073 | 52 | 51 | 32       | 193         | 731  | 30323  | 146,49 | 93,8              |
| chr5 | 37175991 | 37176167 | C5orf42 | NM_023073 | 52 | 51 | 31       | 78          | 198  | 8881   | 50,18  | 100               |
| chr5 | 37177647 | 37177832 | C5orf42 | NM_023073 | 52 | 51 | 30       | 80          | 488  | 19578  | 105,26 | 100               |
| chr5 | 37179442 | 37179618 | C5orf42 | NM_023073 | 52 | 51 | 29       | 83          | 494  | 21355  | 120,65 | 100               |
| chr5 | 37180115 | 37180336 | C5orf42 | NM_023073 | 52 | 51 | 28       | 167         | 80   | 3641   | 16,4   | 100               |
| chr5 | 37180932 | 37181141 | C5orf42 | NM_023073 | 52 | 51 | 27       | 149         | 729  | 31480  | 149,9  | 100               |
| chr5 | 37182846 | 37183819 | C5orf42 | NM_023073 | 52 | 51 | 26       | 940         | 1705 | 82493  | 84,7   | 100               |
| chr5 | 37184892 | 37185175 | C5orf42 | NM_023073 | 52 | 51 | 25       | 292         | 1622 | 70157  | 247,03 | 97,3              |
| chr5 | 37186344 | 37186526 | C5orf42 | NM_023073 | 52 | 51 | 24       | 109         | 384  | 16730  | 91,42  | 100               |
| chr5 | 37187524 | 37187979 | C5orf42 | NM_023073 | 52 | 51 | 23,22    | 159.110     | 830  | 37678  | 82,63  | 95,0,100.0        |
| chr5 | 37195928 | 37196113 | C5orf42 | NM_023073 | 52 | 51 | 21       | 139         | 530  | 22920  | 123,23 | 100               |
| chr5 | 37198758 | 37198958 | C5orf42 | NM_023073 | 52 | 51 | 20       | 165         | 199  | 9064   | 45,09  | 93,9              |
| chr5 | 37201654 | 37201931 | C5orf42 | NM_023073 | 52 | 51 | 19       | 218         | 456  | 20923  | 75,26  | 100               |
| chr5 | 37205410 | 37205589 | C5orf42 | NM_023073 | 52 | 51 | 18       | 140         | 467  | 19226  | 106,81 | 100               |
| chr5 | 37206275 | 37206540 | C5orf42 | NM_023073 | 52 | 51 | 17       | 229         | 1493 | 69795  | 262,39 | 100               |
| chr5 | 37213707 | 37213901 | C5orf42 | NM_023073 | 52 | 51 | 16       | 174         | 298  | 13485  | 69,15  | 73,6              |
| chr5 | 37221304 | 37221664 | C5orf42 | NM_023073 | 52 | 51 | 15       | 165         | 418  | 19253  | 53,33  | 100               |
| chr5 | 37224279 | 37224464 | C5orf42 | NM_023073 | 52 | 51 | 14       | 81          | 279  | 11375  | 61,16  | 100               |
| chr5 | 37224619 | 37224801 | C5orf42 | NM_023073 | 52 | 51 | 13       | 209         | 648  | 26398  | 144,25 | 80,4              |
| chr5 | 37226364 | 37227921 | C5orf42 | NM_023073 | 52 | 51 | 12,11,10 | 770.150.250 | 3875 | 185437 | 119,02 | 100,0,100,0,100,0 |
| chr5 | 37231004 | 37231180 | C5orf42 | NM_023073 | 52 | 51 | 9        | 183         | 261  | 10642  | 60,12  | 80,9              |
| chr5 | 37238877 | 37239071 | C5orf42 | NM_023073 | 52 | 51 | 8        | 104         | 176  | 7389   | 37,89  | 100               |
| chr5 | 37239768 | 37239950 | C5orf42 | NM_023073 | 52 | 51 | 7        | 157         | 246  | 10159  | 55,51  | 86,6              |
| chr5 | 37243040 | 37243228 | C5orf42 | NM_023073 | 52 | 51 | 6        | 107         | 334  | 14186  | 75,06  | 100               |
| chr5 | 37244446 | 37244741 | C5orf42 | NM_023073 | 52 | 51 | 5        | 233         | 391  | 17620  | 59,53  | 100               |
| chr5 | 37245589 | 37245937 | C5orf42 | NM_023073 | 52 | 51 | 4,3      | 120.136     | 705  | 33923  | 97,2   | 93,3,92,6         |
| chr5 | 37247658 | 37247843 | C5orf42 | NM_023073 | 52 | 51 | 2        | 81          | 440  | 18443  | 99,16  | 100               |
| chr5 | 52394260 | 52394549 | MOCS2   | NM_004531 | 7  | 5  | 6        | 66          | 557  | 25511  | 87,97  | 100               |
| chr5 | 52396223 | 52396432 | MOCS2   | NM_004531 | 7  | 5  | 6        | 124         | 114  | 5055   | 24,07  | 100               |
| chr5 | 52397139 | 52397318 | MOCS2   | NM_004531 | 7  | 5  | 5        | 151         | 1226 | 52164  | 289,8  | 86,1              |
| chr5 | 52397839 | 52398045 | MOCS2   | NM_004531 | 7  | 5  | 4        | 128         | 179  | 7883   | 38,08  | 93                |
| chr5 | 52402841 | 52403056 | MOCS2   | NM_004531 | 7  | 5  | 3        | 98          | 559  | 24564  | 113,72 | 100               |
| chr5 | 52404318 | 52404497 | MOCS2   | NM_004531 | 7  | 5  | 2        | 122         | 737  | 32764  | 182,02 | 100               |

|      |          |          |        |           |    |    |      |        |      |       |        |             |
|------|----------|----------|--------|-----------|----|----|------|--------|------|-------|--------|-------------|
| chr5 | 52856353 | 52856574 | NDUFS4 | NM_002495 | 5  | 5  | 1    | 98     | 363  | 15455 | 69,62  | 83,7        |
| chr5 | 52899190 | 52899375 | NDUFS4 | NM_002495 | 5  | 5  | 2    | 79     | 664  | 30182 | 162,27 | 100         |
| chr5 | 52942078 | 52942269 | NDUFS4 | NM_002495 | 5  | 5  | 3    | 173    | 230  | 10459 | 54,47  | 91,3        |
| chr5 | 52954326 | 52954502 | NDUFS4 | NM_002495 | 5  | 5  | 4    | 74     | 365  | 15431 | 87,18  | 100         |
| chr5 | 52978856 | 52979121 | NDUFS4 | NM_002495 | 5  | 5  | 5    | 104    | 135  | 6184  | 23,25  | 100         |
| chr5 | 60170275 | 60170487 | ERCC8  | NM_000082 | 12 | 12 | 12   | 69     | 108  | 4378  | 20,55  | 66,7        |
| chr5 | 60183218 | 60183403 | ERCC8  | NM_000082 | 12 | 12 | 11   | 81     | 827  | 35623 | 191,52 | 100         |
| chr5 | 60186669 | 60186878 | ERCC8  | NM_000082 | 12 | 12 | 10   | 198    | 560  | 23260 | 110,76 | 82,3        |
| chr5 | 60194073 | 60194249 | ERCC8  | NM_000082 | 12 | 12 | 9    | 125    | 307  | 12756 | 72,07  | 100         |
| chr5 | 60195439 | 60195624 | ERCC8  | NM_000082 | 12 | 12 | 8    | 101    | 902  | 38779 | 208,49 | 100         |
| chr5 | 60198267 | 60198446 | ERCC8  | NM_000082 | 12 | 12 | 7    | 67     | 117  | 5205  | 28,92  | 100         |
| chr5 | 60199342 | 60199560 | ERCC8  | NM_000082 | 12 | 12 | 6    | 69     | 73   | 3220  | 14,7   | 100         |
| chr5 | 60200529 | 60200717 | ERCC8  | NM_000082 | 12 | 12 | 5    | 82     | 407  | 16482 | 87,21  | 100         |
| chr5 | 60214098 | 60214271 | ERCC8  | NM_000082 | 12 | 12 | 4    | 124    | 265  | 10485 | 60,26  | 95,2        |
| chr5 | 60217777 | 60217983 | ERCC8  | NM_000082 | 12 | 12 | 3    | 102    | 252  | 11012 | 53,2   | 100         |
| chr5 | 60224623 | 60224808 | ERCC8  | NM_000082 | 12 | 12 | 2    | 96     | 176  | 7757  | 41,7   | 100         |
| chr5 | 60240730 | 60241090 | ERCC8  | NM_000082 | 12 | 12 | 1    | 77     | 1129 | 50518 | 139,94 | 100         |
| chr5 | 68799951 | 68800154 | OCLN   | NM_002538 | 9  | 8  | 2    | 50     | 394  | 17421 | 85,4   | 100         |
| chr5 | 68804969 | 68805637 | OCLN   | NM_002538 | 9  | 8  | 3    | 679    | 1274 | 59198 | 88,49  | 98,5        |
| chr5 | 68809758 | 68809958 | OCLN   | NM_002538 | 9  | 8  | 4    | 162    | 101  | 4541  | 22,59  | 100         |
| chr5 | 68830627 | 68830747 | OCLN   | NM_002538 | 9  | 8  | 5    | 146    | 546  | 21462 | 177,37 | 27,4        |
| chr5 | 70883121 | 70883336 | MCCC2  | NM_022132 | 17 | 17 | 1    | 129    | 1    | 50    | 0,23   | 65,1        |
| chr5 | 70888625 | 70888840 | MCCC2  | NM_022132 | 17 | 17 | 2    | 67     | 270  | 12017 | 55,63  | 100         |
| chr5 | 70892045 | 70892248 | MCCC2  | NM_022132 | 17 | 17 | 3    | 85     | 487  | 21528 | 105,53 | 100         |
| chr5 | 70895439 | 70895639 | MCCC2  | NM_022132 | 17 | 17 | 4    | 102    | 224  | 9504  | 47,28  | 100         |
| chr5 | 70898287 | 70898511 | MCCC2  | NM_022132 | 17 | 17 | 5    | 128    | 331  | 14049 | 62,44  | 100         |
| chr5 | 70900090 | 70900287 | MCCC2  | NM_022132 | 17 | 17 | 6    | 113    | 166  | 7419  | 37,47  | 92,9        |
| chr5 | 70922444 | 70922650 | MCCC2  | NM_022132 | 17 | 17 | 7    | 114    | 486  | 21487 | 103,8  | 100         |
| chr5 | 70927888 | 70928079 | MCCC2  | NM_022132 | 17 | 17 | 8    | 65     | 631  | 26929 | 140,26 | 100         |
| chr5 | 70930701 | 70931138 | MCCC2  | NM_022132 | 17 | 17 | 9,10 | 100,96 | 1176 | 55595 | 126,93 | 100,0,100,0 |
| chr5 | 70936802 | 70937029 | MCCC2  | NM_022132 | 17 | 17 | 11   | 73     | 471  | 19673 | 86,29  | 100         |
| chr5 | 70939575 | 70939757 | MCCC2  | NM_022132 | 17 | 17 | 12   | 77     | 303  | 13144 | 71,83  | 100         |
| chr5 | 70942045 | 70942218 | MCCC2  | NM_022132 | 17 | 17 | 13   | 67     | 362  | 15956 | 91,7   | 89,6        |
| chr5 | 70944829 | 70945029 | MCCC2  | NM_022132 | 17 | 17 | 14   | 157    | 753  | 33082 | 164,59 | 67,5        |
| chr5 | 70945790 | 70945981 | MCCC2  | NM_022132 | 17 | 17 | 15   | 115    | 664  | 27246 | 141,91 | 74,8        |
| chr5 | 70948393 | 70948572 | MCCC2  | NM_022132 | 17 | 17 | 16   | 86     | 221  | 9120  | 50,67  | 89,5        |
| chr5 | 70952509 | 70952783 | MCCC2  | NM_022132 | 17 | 17 | 17   | 118    | 692  | 32218 | 117,16 | 100         |
| chr5 | 77298599 | 77298894 | AP3B1  | NM_003664 | 27 | 27 | 27   | 154    | 908  | 42893 | 144,91 | 100         |
| chr5 | 77311175 | 77311387 | AP3B1  | NM_003664 | 27 | 27 | 26   | 139    | 279  | 12585 | 59,08  | 100         |
| chr5 | 77316464 | 77316652 | AP3B1  | NM_003664 | 27 | 27 | 25   | 98     | 320  | 14093 | 74,57  | 100         |
| chr5 | 77330141 | 77330311 | AP3B1  | NM_003664 | 27 | 27 | 24   | 85     | 140  | 6004  | 35,11  | 100         |
| chr5 | 77334884 | 77335143 | AP3B1  | NM_003664 | 27 | 27 | 23   | 232    | 322  | 13828 | 53,18  | 92,7        |
| chr5 | 77385172 | 77385375 | AP3B1  | NM_003664 | 27 | 27 | 22   | 107    | 236  | 10018 | 49,11  | 100         |
| chr5 | 77396769 | 77396978 | AP3B1  | NM_003664 | 27 | 27 | 21   | 73     | 182  | 7448  | 35,47  | 100         |
| chr5 | 77405998 | 77406192 | AP3B1  | NM_003664 | 27 | 27 | 20   | 148    | 53   | 2102  | 10,78  | 100         |
| chr5 | 77409516 | 77409686 | AP3B1  | NM_003664 | 27 | 27 | 19   | 172    | 1258 | 53272 | 311,53 | 64,5        |
| chr5 | 77411873 | 77412073 | AP3B1  | NM_003664 | 27 | 27 | 18   | 109    | 794  | 32913 | 163,75 | 100         |
| chr5 | 77423824 | 77424009 | AP3B1  | NM_003664 | 27 | 27 | 17   | 131    | 413  | 17981 | 96,67  | 100         |
| chr5 | 77424952 | 77425134 | AP3B1  | NM_003664 | 27 | 27 | 16   | 187    | 491  | 20367 | 111,3  | 96,3        |
| chr5 | 77436957 | 77437154 | AP3B1  | NM_003664 | 27 | 27 | 15   | 177    | 458  | 19058 | 96,25  | 100         |
| chr5 | 77451979 | 77452173 | AP3B1  | NM_003664 | 27 | 27 | 14   | 110    | 662  | 28880 | 148,1  | 83,6        |
| chr5 | 77458596 | 77458796 | AP3B1  | NM_003664 | 27 | 27 | 13   | 133    | 630  | 27655 | 137,59 | 100         |
| chr5 | 77461364 | 77461552 | AP3B1  | NM_003664 | 27 | 27 | 12   | 63     | 154  | 6465  | 34,21  | 100         |
| chr5 | 77471407 | 77471580 | AP3B1  | NM_003664 | 27 | 27 | 11   | 72     | 814  | 35291 | 202,82 | 100         |
| chr5 | 77473147 | 77473338 | AP3B1  | NM_003664 | 27 | 27 | 9    | 98     | 222  | 9197  | 47,9   | 100         |
| chr5 | 77477329 | 77477538 | AP3B1  | NM_003664 | 27 | 27 | 8    | 156    | 139  | 5721  | 27,24  | 100         |
| chr5 | 77511806 | 77512012 | AP3B1  | NM_003664 | 27 | 27 | 7    | 183    | 1399 | 60666 | 293,07 | 73,2        |

|      |           |           |         |              |    |    |     |        |      |        |        |            |
|------|-----------|-----------|---------|--------------|----|----|-----|--------|------|--------|--------|------------|
| chr5 | 77521325  | 77521531  | AP3B1   | NM_003664    | 27 | 27 | 6   | 67     | 77   | 3177   | 15,35  | 100        |
| chr5 | 77523184  | 77523369  | AP3B1   | NM_003664    | 27 | 27 | 5   | 161    | 163  | 7079   | 38,06  | 100        |
| chr5 | 77523873  | 77524073  | AP3B1   | NM_003664    | 27 | 27 | 4   | 96     | 434  | 19126  | 95,15  | 100        |
| chr5 | 77536604  | 77536792  | AP3B1   | NM_003664    | 27 | 27 | 3   | 75     | 171  | 6968   | 36,87  | 100        |
| chr5 | 77563290  | 77563472  | AP3B1   | NM_003664    | 27 | 27 | 2   | 76     | 293  | 13230  | 72,3   | 100        |
| chr5 | 77590216  | 77590496  | AP3B1   | NM_003664    | 27 | 27 | 1   | 128    | 686  | 30975  | 110,23 | 100        |
| chr5 | 79929780  | 79929900  | DHFR    | NM_000791    | 6  | 6  | 5   | 116    | 95   | 4165   | 34,42  | 27,6       |
| chr5 | 79933795  | 79933915  | DHFR    | NM_000791    | 6  | 6  | 4   | 127    | 32   | 1223   | 10,11  | 26,8       |
| chr5 | 79945296  | 79945416  | DHFR    | NM_000791    | 6  | 6  | 3   | 106    | 142  | 5448   | 45,02  | 17         |
| chr5 | 79949825  | 79949995  | DHFR    | NM_000791    | 6  | 6  | 2   | 50     | 621  | 26829  | 156,89 | 100        |
| chr5 | 79950286  | 79950886  | DHFR    | NM_000791    | 6  | 6  | 1   | 86     | 216  | 10169  | 16,92  | 26,7       |
| chr5 | 88018358  | 88018783  | MEF2C   | NM_001193347 | 12 | 10 | 12  | 322    | 762  | 34341  | 80,61  | 100        |
| chr5 | 88024270  | 88024485  | MEF2C   | NM_001193347 | 12 | 10 | 11  | 136    | 121  | 5659   | 26,2   | 100        |
| chr5 | 88024992  | 88025192  | MEF2C   | NM_001193347 | 12 | 10 | 10  | 130    | 406  | 17367  | 86,4   | 100        |
| chr5 | 88027546  | 88027758  | MEF2C   | NM_001193347 | 12 | 10 | 9   | 173    | 238  | 10360  | 48,64  | 100        |
| chr5 | 88044773  | 88044967  | MEF2C   | NM_001193347 | 12 | 10 | 8   | 48     | 689  | 26902  | 137,96 | 100        |
| chr5 | 88047606  | 88047806  | MEF2C   | NM_001193347 | 12 | 10 | 7   | 187    | 815  | 36181  | 180    | 71,1       |
| chr5 | 88056830  | 88057199  | MEF2C   | NM_001193347 | 12 | 10 | 6,5 | 138,60 | 650  | 31405  | 84,88  | 81,9,100.0 |
| chr5 | 88100487  | 88100672  | MEF2C   | NM_001193347 | 12 | 10 | 4   | 204    | 389  | 16643  | 89,48  | 64,7       |
| chr5 | 88119593  | 88119787  | MEF2C   | NM_001193347 | 12 | 10 | 3   | 54     | 334  | 13650  | 70     | 24,1       |
| chr5 | 138282761 | 138283118 | SIL1    | NM_022464    | 10 | 9  | 10  | 357    | 346  | 15016  | 41,94  | 87,7       |
| chr5 | 138286796 | 138286972 | SIL1    | NM_022464    | 10 | 9  | 9   | 165    | 330  | 14124  | 79,8   | 68,5       |
| chr5 | 138287382 | 138287588 | SIL1    | NM_022464    | 10 | 9  | 8   | 97     | 215  | 9380   | 45,31  | 100        |
| chr5 | 138356892 | 138357092 | SIL1    | NM_022464    | 10 | 9  | 7   | 122    | 740  | 32276  | 160,58 | 73,8       |
| chr5 | 138362455 | 138362646 | SIL1    | NM_022464    | 10 | 9  | 6   | 192    | 248  | 10074  | 52,47  | 81,8       |
| chr5 | 138378207 | 138378398 | SIL1    | NM_022464    | 10 | 9  | 5   | 100    | 1585 | 67386  | 350,97 | 90         |
| chr5 | 138386562 | 138386756 | SIL1    | NM_022464    | 10 | 9  | 4   | 109    | 1211 | 52730  | 270,41 | 100        |
| chr5 | 138456758 | 138456952 | SIL1    | NM_022464    | 10 | 9  | 3   | 139    | 223  | 9501   | 48,72  | 75,5       |
| chr5 | 138463475 | 138463740 | SIL1    | NM_022464    | 10 | 9  | 2   | 105    | 653  | 28003  | 105,27 | 55,2       |
| chr5 | 176562050 | 176563053 | NSD1    | NM_022455    | 23 | 22 | 2   | 927    | 3175 | 151523 | 150,92 | 100        |
| chr5 | 176618843 | 176619049 | NSD1    | NM_022455    | 23 | 22 | 3   | 136    | 392  | 17656  | 85,29  | 100        |
| chr5 | 176631172 | 176631360 | NSD1    | NM_022455    | 23 | 22 | 4   | 173    | 86   | 3558   | 18,83  | 70,5       |
| chr5 | 176636628 | 176639231 | NSD1    | NM_022455    | 23 | 22 | 5   | 2560   | 7189 | 350953 | 134,77 | 100        |
| chr5 | 176662747 | 176662950 | NSD1    | NM_022455    | 23 | 22 | 6   | 125    | 30   | 1435   | 7,03   | 100        |
| chr5 | 176665172 | 176665437 | NSD1    | NM_022455    | 23 | 22 | 7   | 271    | 441  | 19693  | 74,03  | 73,8       |
| chr5 | 176666735 | 176666941 | NSD1    | NM_022455    | 23 | 22 | 8   | 110    | 73   | 2815   | 13,6   | 100        |
| chr5 | 176671160 | 176671378 | NSD1    | NM_022455    | 23 | 22 | 9   | 76     | 225  | 9654   | 44,08  | 100        |
| chr5 | 176673712 | 176673909 | NSD1    | NM_022455    | 23 | 22 | 10  | 119    | 114  | 4767   | 24,08  | 72,3       |
| chr5 | 176675219 | 176675419 | NSD1    | NM_022455    | 23 | 22 | 11  | 144    | 372  | 15296  | 76,1   | 74,3       |
| chr5 | 176678677 | 176678907 | NSD1    | NM_022455    | 23 | 22 | 12  | 124    | 261  | 10876  | 47,08  | 100        |
| chr5 | 176683903 | 176684079 | NSD1    | NM_022455    | 23 | 22 | 13  | 201    | 157  | 6851   | 38,71  | 63,7       |
| chr5 | 176686919 | 176687104 | NSD1    | NM_022455    | 23 | 22 | 14  | 180    | 262  | 11856  | 63,74  | 63,9       |
| chr5 | 176694615 | 176694806 | NSD1    | NM_022455    | 23 | 22 | 15  | 157    | 759  | 31441  | 163,76 | 66,9       |
| chr5 | 176696653 | 176696880 | NSD1    | NM_022455    | 23 | 22 | 16  | 206    | 538  | 22519  | 98,77  | 75,7       |
| chr5 | 176700613 | 176700834 | NSD1    | NM_022455    | 23 | 22 | 17  | 113    | 180  | 7879   | 35,49  | 100        |
| chr5 | 176707554 | 176707855 | NSD1    | NM_022455    | 23 | 22 | 18  | 270    | 782  | 35700  | 118,21 | 100        |
| chr5 | 176709480 | 176709689 | NSD1    | NM_022455    | 23 | 22 | 19  | 117    | 222  | 9384   | 44,69  | 88         |
| chr5 | 176710830 | 176711006 | NSD1    | NM_022455    | 23 | 22 | 20  | 142    | 157  | 6238   | 35,24  | 70,4       |
| chr5 | 176715778 | 176715960 | NSD1    | NM_022455    | 23 | 22 | 21  | 107    | 930  | 40830  | 223,11 | 100        |
| chr5 | 176718896 | 176719093 | NSD1    | NM_022455    | 23 | 22 | 22  | 205    | 169  | 7531   | 38,04  | 67,8       |
| chr5 | 176720728 | 176722558 | NSD1    | NM_022455    | 23 | 22 | 23  | 1628   | 7752 | 373586 | 204,03 | 100        |
| chr5 | 177027144 | 177027332 | B4GALT7 | NM_007255    | 6  | 6  | 1   | 50     | 2    | 62     | 0,33   | 100        |
| chr5 | 177031151 | 177031502 | B4GALT7 | NM_007255    | 6  | 6  | 2   | 363    | 187  | 8325   | 23,65  | 89         |
| chr5 | 177034299 | 177034576 | B4GALT7 | NM_007255    | 6  | 6  | 3   | 226    | 920  | 42670  | 153,49 | 100        |
| chr5 | 177035511 | 177035705 | B4GALT7 | NM_007255    | 6  | 6  | 4   | 84     | 124  | 5443   | 27,91  | 100        |
| chr5 | 177035892 | 177036098 | B4GALT7 | NM_007255    | 6  | 6  | 5   | 105    | 147  | 6260   | 30,24  | 100        |
| chr5 | 177036547 | 177036827 | B4GALT7 | NM_007255    | 6  | 6  | 6   | 156    | 211  | 9509   | 33,84  | 96,2       |



|      |          |          |         |           |    |    |       |             |      |        |        |                  |
|------|----------|----------|---------|-----------|----|----|-------|-------------|------|--------|--------|------------------|
| chr6 | 3224906  | 3225026  | TUBB2B  | NM_178012 | 4  | 4  | 4     | 1061        | 1319 | 42021  | 347,28 | 4                |
| chr6 | 3226407  | 3226607  | TUBB2B  | NM_178012 | 4  | 4  | 3     | 111         | 606  | 25195  | 125,35 | 87,4             |
| chr6 | 3226900  | 3227020  | TUBB2B  | NM_178012 | 4  | 4  | 2     | 109         | 539  | 19825  | 163,84 | 3,7              |
| chr6 | 3227745  | 3227930  | TUBB2B  | NM_178012 | 4  | 4  | 1     | 57          | 6    | 234    | 1,26   | 57,9             |
| chr6 | 24495135 | 24495658 | ALDH5A1 | NM_170740 | 11 | 11 | 1     | 354         | 38   | 1593   | 3,04   | 100              |
| chr6 | 24502737 | 24502913 | ALDH5A1 | NM_170740 | 11 | 11 | 2     | 84          | 104  | 4436   | 25,06  | 100              |
| chr6 | 24503430 | 24503603 | ALDH5A1 | NM_170740 | 11 | 11 | 3     | 171         | 133  | 5725   | 32,9   | 66,1             |
| chr6 | 24504985 | 24505185 | ALDH5A1 | NM_170740 | 11 | 11 | 4     | 117         | 541  | 24786  | 123,31 | 76,1             |
| chr6 | 24515342 | 24515542 | ALDH5A1 | NM_170740 | 11 | 11 | 6     | 144         | 85   | 3431   | 17,07  | 100              |
| chr6 | 24520537 | 24520728 | ALDH5A1 | NM_170740 | 11 | 11 | 7     | 144         | 213  | 8559   | 44,58  | 69,4             |
| chr6 | 24522976 | 24523173 | ALDH5A1 | NM_170740 | 11 | 11 | 8     | 159         | 134  | 6035   | 30,48  | 100              |
| chr6 | 24528158 | 24528334 | ALDH5A1 | NM_170740 | 11 | 11 | 9     | 170         | 476  | 19980  | 112,88 | 64,7             |
| chr6 | 24532260 | 24532487 | ALDH5A1 | NM_170740 | 11 | 11 | 10    | 59          | 246  | 10729  | 47,06  | 100              |
| chr6 | 24533738 | 24534018 | ALDH5A1 | NM_170740 | 11 | 11 | 11    | 206         | 340  | 14236  | 50,66  | 98,5             |
| chr6 | 31827402 | 31828331 | NEU1    | NM_000434 | 6  | 6  | 6,5,4 | 227.223.183 | 3364 | 160464 | 172,54 | 100,0,100,0,63,4 |
| chr6 | 31829030 | 31829301 | NEU1    | NM_000434 | 6  | 6  | 3     | 263         | 580  | 25557  | 93,96  | 75,3             |
| chr6 | 31829741 | 31829938 | NEU1    | NM_000434 | 6  | 6  | 2     | 193         | 241  | 9595   | 48,46  | 84,5             |
| chr6 | 31830379 | 31830647 | NEU1    | NM_000434 | 6  | 6  | 1     | 159         | 141  | 6007   | 22,33  | 100              |
| chr6 | 33387949 | 33388152 | SYNGAP1 | NM_006772 | 19 | 19 | 1     | 67          | 3    | 87     | 0,43   | 100              |
| chr6 | 33391283 | 33391486 | SYNGAP1 | NM_006772 | 19 | 19 | 2     | 122         | 96   | 4391   | 21,52  | 76,2             |
| chr6 | 33393512 | 33393685 | SYNGAP1 | NM_006772 | 19 | 19 | 3     | 106         | 145  | 6392   | 36,74  | 100              |
| chr6 | 33399600 | 33399969 | SYNGAP1 | NM_006772 | 19 | 19 | 4     | 92          | 402  | 17798  | 48,1   | 34,8             |
| chr6 | 33400482 | 33400691 | SYNGAP1 | NM_006772 | 19 | 19 | 5     | 122         | 291  | 13019  | 62     | 83,6             |
| chr6 | 33402851 | 33403057 | SYNGAP1 | NM_006772 | 19 | 19 | 6     | 154         | 176  | 8318   | 40,18  | 83,8             |
| chr6 | 33403207 | 33403404 | SYNGAP1 | NM_006772 | 19 | 19 | 7     | 99          | 590  | 27551  | 139,15 | 100              |
| chr6 | 33405435 | 33406346 | SYNGAP1 | NM_006772 | 19 | 19 | 8,9   | 624.145     | 2136 | 101037 | 110,79 | 100,0,100,0      |
| chr6 | 33406509 | 33406691 | SYNGAP1 | NM_006772 | 19 | 19 | 10    | 145         | 378  | 17202  | 94     | 96,6             |
| chr6 | 33408423 | 33408691 | SYNGAP1 | NM_006772 | 19 | 19 | 11    | 237         | 374  | 16459  | 61,19  | 78,5             |
| chr6 | 33408896 | 33409090 | SYNGAP1 | NM_006772 | 19 | 19 | 12    | 202         | 312  | 14221  | 72,93  | 69,8             |
| chr6 | 33409400 | 33409618 | SYNGAP1 | NM_006772 | 19 | 19 | 13    | 179         | 101  | 4135   | 18,88  | 76,5             |
| chr6 | 33410081 | 33410284 | SYNGAP1 | NM_006772 | 19 | 19 | 14    | 42          | 1974 | 87200  | 427,45 | 100              |
| chr6 | 33410592 | 33411675 | SYNGAP1 | NM_006772 | 19 | 19 | 15    | 1072        | 2306 | 111080 | 102,47 | 94,2             |
| chr6 | 33412282 | 33412464 | SYNGAP1 | NM_006772 | 19 | 19 | 16    | 174         | 290  | 12319  | 67,32  | 64,9             |
| chr6 | 33414360 | 33414557 | SYNGAP1 | NM_006772 | 19 | 19 | 17    | 212         | 331  | 14864  | 75,07  | 93,4             |
| chr6 | 33415619 | 33415834 | SYNGAP1 | NM_006772 | 19 | 19 | 18    | 91          | 2101 | 86666  | 401,23 | 100              |
| chr6 | 33419595 | 33419777 | SYNGAP1 | NM_006772 | 19 | 19 | 19    | 147         | 410  | 18299  | 99,99  | 60,5             |
| chr6 | 39871891 | 39872233 | MOCS1   | NM_005943 | 10 | 9  | 10    | 2860        | 1419 | 62208  | 181,36 | 7                |
| chr6 | 39873136 | 39873650 | MOCS1   | NM_005943 | 10 | 9  | 10    | 2860        | 1715 | 79281  | 153,94 | 18               |
| chr6 | 39874016 | 39874370 | MOCS1   | NM_005943 | 10 | 9  | 10    | 2860        | 1071 | 51974  | 146,41 | 12,4             |
| chr6 | 39874440 | 39874880 | MOCS1   | NM_005943 | 10 | 9  | 10    | 2860        | 834  | 39168  | 88,82  | 15,4             |
| chr6 | 39876681 | 39876893 | MOCS1   | NM_005943 | 10 | 9  | 9     | 56          | 182  | 7609   | 35,72  | 100              |
| chr6 | 39877613 | 39877789 | MOCS1   | NM_005943 | 10 | 9  | 8     | 121         | 292  | 12468  | 70,44  | 71,9             |
| chr6 | 39880037 | 39880213 | MOCS1   | NM_005943 | 10 | 9  | 7     | 111         | 172  | 7384   | 41,72  | 73,9             |
| chr6 | 39880636 | 39880815 | MOCS1   | NM_005943 | 10 | 9  | 6     | 113         | 941  | 39275  | 218,19 | 100              |
| chr6 | 39880977 | 39881174 | MOCS1   | NM_005943 | 10 | 9  | 5     | 112         | 714  | 31716  | 160,18 | 100              |
| chr6 | 39881508 | 39881708 | MOCS1   | NM_005943 | 10 | 9  | 4     | 62          | 730  | 30967  | 154,06 | 100              |
| chr6 | 39883868 | 39884038 | MOCS1   | NM_005943 | 10 | 9  | 3     | 165         | 169  | 6768   | 39,58  | 66,1             |
| chr6 | 39893330 | 39893530 | MOCS1   | NM_005943 | 10 | 9  | 2     | 168         | 598  | 25546  | 127,09 | 64,9             |
| chr6 | 39895094 | 39895371 | MOCS1   | NM_005943 | 10 | 9  | 1     | 250         | 103  | 4446   | 15,99  | 89,6             |
| chr6 | 49399373 | 49399576 | MUT     | NM_000255 | 13 | 12 | 13    | 129         | 487  | 20216  | 99,1   | 100              |
| chr6 | 49403104 | 49403277 | MUT     | NM_000255 | 13 | 12 | 12    | 168         | 590  | 24878  | 142,98 | 64,9             |
| chr6 | 49407877 | 49408095 | MUT     | NM_000255 | 13 | 12 | 11    | 148         | 487  | 20957  | 95,69  | 100              |
| chr6 | 49409479 | 49409673 | MUT     | NM_000255 | 13 | 12 | 10    | 132         | 367  | 15812  | 81,09  | 91,7             |
| chr6 | 49412384 | 49412557 | MUT     | NM_000255 | 13 | 12 | 9     | 116         | 296  | 12807  | 73,6   | 72,4             |
| chr6 | 49415301 | 49415516 | MUT     | NM_000255 | 13 | 12 | 8     | 116         | 177  | 7282   | 33,71  | 100              |
| chr6 | 49416490 | 49416672 | MUT     | NM_000255 | 13 | 12 | 7     | 112         | 576  | 24511  | 133,94 | 100              |
| chr6 | 49419159 | 49419439 | MUT     | NM_000255 | 13 | 12 | 6     | 249         | 1181 | 52927  | 188,35 | 100              |

|      |           |           |         |           |    |    |       |        |      |       |        |            |
|------|-----------|-----------|---------|-----------|----|----|-------|--------|------|-------|--------|------------|
| chr6 | 49421289  | 49421483  | MUT     | NM_000255 | 13 | 12 | 5     | 172    | 203  | 8716  | 44,7   | 100        |
| chr6 | 49423756  | 49423962  | MUT     | NM_000255 | 13 | 12 | 4     | 158    | 458  | 20096 | 97,08  | 100        |
| chr6 | 49425437  | 49425800  | MUT     | NM_000255 | 13 | 12 | 3     | 368    | 713  | 33145 | 91,06  | 91         |
| chr6 | 49426776  | 49427213  | MUT     | NM_000255 | 13 | 12 | 2     | 385    | 308  | 14064 | 32,11  | 100        |
| chr6 | 74304716  | 74304993  | SLC17A5 | NM_012434 | 11 | 11 | 11    | 138    | 530  | 22916 | 82,43  | 100        |
| chr6 | 74309997  | 74310203  | SLC17A5 | NM_012434 | 11 | 11 | 10    | 91     | 352  | 16103 | 77,79  | 100        |
| chr6 | 74320096  | 74320299  | SLC17A5 | NM_012434 | 11 | 11 | 9     | 148    | 382  | 16965 | 83,16  | 100        |
| chr6 | 74325018  | 74325206  | SLC17A5 | NM_012434 | 11 | 11 | 8     | 133    | 398  | 17614 | 93,2   | 100        |
| chr6 | 74331565  | 74331768  | SLC17A5 | NM_012434 | 11 | 11 | 7     | 159    | 310  | 13026 | 63,85  | 76,1       |
| chr6 | 74345087  | 74345278  | SLC17A5 | NM_012434 | 11 | 11 | 6     | 119    | 47   | 1776  | 9,25   | 100        |
| chr6 | 74346331  | 74346510  | SLC17A5 | NM_012434 | 11 | 11 | 5     | 87     | 197  | 9117  | 50,65  | 100        |
| chr6 | 74348015  | 74348218  | SLC17A5 | NM_012434 | 11 | 11 | 4     | 88     | 359  | 15559 | 76,27  | 95,5       |
| chr6 | 74351438  | 74351721  | SLC17A5 | NM_012434 | 11 | 11 | 3     | 234    | 949  | 39183 | 137,97 | 89,7       |
| chr6 | 74354121  | 74354324  | SLC17A5 | NM_012434 | 11 | 11 | 2     | 197    | 161  | 7223  | 35,41  | 99         |
| chr6 | 74363539  | 74363730  | SLC17A5 | NM_012434 | 11 | 11 | 1     | 94     | 8    | 359   | 1,87   | 75,5       |
| chr6 | 80626277  | 80626634  | ELOVL4  | NM_022726 | 6  | 6  | 6     | 276    | 219  | 10384 | 29,01  | 100        |
| chr6 | 80629079  | 80629258  | ELOVL4  | NM_022726 | 6  | 6  | 5     | 128    | 300  | 13208 | 73,38  | 95,3       |
| chr6 | 80631252  | 80631464  | ELOVL4  | NM_022726 | 6  | 6  | 4     | 172    | 476  | 20677 | 97,08  | 71,5       |
| chr6 | 80634608  | 80634808  | ELOVL4  | NM_022726 | 6  | 6  | 3     | 81     | 232  | 10502 | 52,25  | 100        |
| chr6 | 80635934  | 80636131  | ELOVL4  | NM_022726 | 6  | 6  | 2     | 188    | 352  | 15226 | 76,9   | 87,8       |
| chr6 | 80656869  | 80657146  | ELOVL4  | NM_022726 | 6  | 6  | 1     | 100    | 130  | 6175  | 22,21  | 100        |
| chr6 | 80816371  | 80816580  | BCKDHB  | NM_183050 | 10 | 10 | 1     | 196    | 4    | 167   | 0,8    | 86,7       |
| chr6 | 80837247  | 80837423  | BCKDHB  | NM_183050 | 10 | 10 | 2     | 78     | 533  | 22972 | 129,79 | 100        |
| chr6 | 80838865  | 80839086  | BCKDHB  | NM_183050 | 10 | 10 | 3     | 69     | 214  | 9009  | 40,58  | 100        |
| chr6 | 80877397  | 80877603  | BCKDHB  | NM_183050 | 10 | 10 | 4     | 134    | 269  | 12000 | 57,97  | 98,5       |
| chr6 | 80878587  | 80878790  | BCKDHB  | NM_183050 | 10 | 10 | 5     | 156    | 545  | 24043 | 117,86 | 100        |
| chr6 | 80880925  | 80881113  | BCKDHB  | NM_183050 | 10 | 10 | 6     | 109    | 113  | 4761  | 25,19  | 100        |
| chr6 | 80910614  | 80910841  | BCKDHB  | NM_183050 | 10 | 10 | 7     | 98     | 712  | 32796 | 143,84 | 100        |
| chr6 | 80912773  | 80912979  | BCKDHB  | NM_183050 | 10 | 10 | 8     | 111    | 310  | 14137 | 68,29  | 100        |
| chr6 | 80982800  | 80983009  | BCKDHB  | NM_183050 | 10 | 10 | 9     | 87     | 176  | 7377  | 35,13  | 100        |
| chr6 | 81053374  | 81053651  | BCKDHB  | NM_183050 | 10 | 10 | 10    | 141    | 1330 | 62080 | 223,31 | 100        |
| chr6 | 88224099  | 88224275  | RARS2   | NM_020320 | 20 | 20 | 20    | 87     | 268  | 10730 | 60,62  | 100        |
| chr6 | 88224609  | 88224800  | RARS2   | NM_020320 | 20 | 20 | 19    | 64     | 298  | 12858 | 66,97  | 100        |
| chr6 | 88226475  | 88226657  | RARS2   | NM_020320 | 20 | 20 | 18    | 75     | 386  | 15850 | 86,61  | 100        |
| chr6 | 88227810  | 88227992  | RARS2   | NM_020320 | 20 | 20 | 17    | 96     | 448  | 17561 | 95,96  | 100        |
| chr6 | 88228362  | 88228648  | RARS2   | NM_020320 | 20 | 20 | 16,15 | 110,68 | 612  | 26337 | 91,77  | 87,3,100,0 |
| chr6 | 88229313  | 88229537  | RARS2   | NM_020320 | 20 | 20 | 14    | 125    | 607  | 27601 | 122,67 | 90,4       |
| chr6 | 88229772  | 88229978  | RARS2   | NM_020320 | 20 | 20 | 13    | 77     | 927  | 38998 | 188,4  | 100        |
| chr6 | 88231168  | 88231374  | RARS2   | NM_020320 | 20 | 20 | 12    | 61     | 251  | 10270 | 49,61  | 100        |
| chr6 | 88234207  | 88234422  | RARS2   | NM_020320 | 20 | 20 | 11    | 96     | 272  | 12116 | 56,09  | 100        |
| chr6 | 88239272  | 88239475  | RARS2   | NM_020320 | 20 | 20 | 10    | 107    | 369  | 16583 | 81,29  | 88,8       |
| chr6 | 88240492  | 88240671  | RARS2   | NM_020320 | 20 | 20 | 9     | 159    | 261  | 10942 | 60,79  | 100        |
| chr6 | 88251585  | 88251773  | RARS2   | NM_020320 | 20 | 20 | 8     | 77     | 308  | 13742 | 72,71  | 100        |
| chr6 | 88255239  | 88255436  | RARS2   | NM_020320 | 20 | 20 | 7     | 84     | 554  | 24371 | 123,09 | 100        |
| chr6 | 88258260  | 88258466  | RARS2   | NM_020320 | 20 | 20 | 6     | 56     | 438  | 17089 | 82,56  | 100        |
| chr6 | 88265017  | 88265217  | RARS2   | NM_020320 | 20 | 20 | 5     | 98     | 666  | 28439 | 141,49 | 93,9       |
| chr6 | 88272307  | 88272486  | RARS2   | NM_020320 | 20 | 20 | 4     | 84     | 252  | 10593 | 58,85  | 79,8       |
| chr6 | 88273768  | 88273962  | RARS2   | NM_020320 | 20 | 20 | 3     | 103    | 357  | 14926 | 76,54  | 100        |
| chr6 | 88279228  | 88279446  | RARS2   | NM_020320 | 20 | 20 | 2     | 74     | 36   | 1450  | 6,62   | 100        |
| chr6 | 101847072 | 101847278 | GRIK2   | NM_021956 | 16 | 16 | 1     | 115    | 492  | 21683 | 104,75 | 100        |
| chr6 | 102069807 | 102069992 | GRIK2   | NM_021956 | 16 | 16 | 2     | 168    | 383  | 16169 | 86,93  | 100        |
| chr6 | 102074300 | 102074580 | GRIK2   | NM_021956 | 16 | 16 | 3     | 258    | 1004 | 46412 | 165,17 | 82,6       |
| chr6 | 102124503 | 102124679 | GRIK2   | NM_021956 | 16 | 16 | 4     | 182    | 209  | 8966  | 50,66  | 97,3       |
| chr6 | 102130288 | 102130491 | GRIK2   | NM_021956 | 16 | 16 | 5     | 54     | 194  | 7713  | 37,81  | 100        |
| chr6 | 102133993 | 102134178 | GRIK2   | NM_021956 | 16 | 16 | 6     | 174    | 275  | 12357 | 66,44  | 71,3       |
| chr6 | 102247431 | 102247625 | GRIK2   | NM_021956 | 16 | 16 | 7     | 144    | 2133 | 95606 | 490,29 | 71,5       |
| chr6 | 102250141 | 102250329 | GRIK2   | NM_021956 | 16 | 16 | 8     | 108    | 339  | 14965 | 79,18  | 100        |

|      |           |           |       |           |    |    |          |             |      |        |        |                   |
|------|-----------|-----------|-------|-----------|----|----|----------|-------------|------|--------|--------|-------------------|
| chr6 | 102266171 | 102266380 | GRIK2 | NM_021956 | 16 | 16 | 9        | 114         | 283  | 12377  | 58,94  | 100               |
| chr6 | 102307197 | 102307391 | GRIK2 | NM_021956 | 16 | 16 | 10       | 207         | 1118 | 49463  | 253,66 | 83,1              |
| chr6 | 102337571 | 102337836 | GRIK2 | NM_021956 | 16 | 16 | 11       | 224         | 586  | 27468  | 103,26 | 75                |
| chr6 | 102372509 | 102372709 | GRIK2 | NM_021956 | 16 | 16 | 12       | 119         | 651  | 28181  | 140,2  | 72,3              |
| chr6 | 102376246 | 102376532 | GRIK2 | NM_021956 | 16 | 16 | 13       | 218         | 641  | 29850  | 104,01 | 100               |
| chr6 | 102483197 | 102483480 | GRIK2 | NM_021956 | 16 | 16 | 14       | 226         | 1091 | 48460  | 170,63 | 100               |
| chr6 | 102503174 | 102503460 | GRIK2 | NM_021956 | 16 | 16 | 15       | 251         | 444  | 20564  | 71,65  | 100               |
| chr6 | 102516165 | 102516439 | GRIK2 | NM_021956 | 16 | 16 | 16       | 165         | 311  | 13871  | 50,44  | 100               |
| chr6 | 107475707 | 107475996 | PDSS2 | NM_020381 | 8  | 8  | 8        | 159         | 702  | 32869  | 113,34 | 100               |
| chr6 | 107514962 | 107515171 | PDSS2 | NM_020381 | 8  | 8  | 7        | 33          | 285  | 12218  | 58,18  | 100               |
| chr6 | 107531589 | 107531762 | PDSS2 | NM_020381 | 8  | 8  | 6        | 132         | 330  | 13911  | 79,95  | 90,9              |
| chr6 | 107533275 | 107533484 | PDSS2 | NM_020381 | 8  | 8  | 5        | 174         | 723  | 31900  | 151,9  | 98,9              |
| chr6 | 107566705 | 107566917 | PDSS2 | NM_020381 | 8  | 8  | 4        | 72          | 98   | 4354   | 20,44  | 100               |
| chr6 | 107595240 | 107595431 | PDSS2 | NM_020381 | 8  | 8  | 3        | 199         | 958  | 42308  | 220,35 | 96,5              |
| chr6 | 107655305 | 107655493 | PDSS2 | NM_020381 | 8  | 8  | 2        | 135         | 213  | 8534   | 45,15  | 68,1              |
| chr6 | 107780227 | 107780599 | PDSS2 | NM_020381 | 8  | 8  | 1        | 296         | 469  | 20224  | 54,22  | 88,9              |
| chr6 | 107811714 | 107811964 | SOBP  | NM_018013 | 7  | 6  | 1        | 96          | 102  | 4415   | 17,59  | 100               |
| chr6 | 107824904 | 107825089 | SOBP  | NM_018013 | 7  | 6  | 2        | 139         | 515  | 22102  | 118,83 | 69,1              |
| chr6 | 107827483 | 107827680 | SOBP  | NM_018013 | 7  | 6  | 3        | 186         | 629  | 25766  | 130,13 | 80,1              |
| chr6 | 107854566 | 107854763 | SOBP  | NM_018013 | 7  | 6  | 4        | 152         | 271  | 12568  | 63,47  | 66,4              |
| chr6 | 107908230 | 107908436 | SOBP  | NM_018013 | 7  | 6  | 5        | 96          | 72   | 3269   | 15,79  | 100               |
| chr6 | 107954654 | 107956599 | SOBP  | NM_018013 | 7  | 6  | 6        | 1953        | 2794 | 129296 | 66,44  | 96,4              |
| chr6 | 129204397 | 129204594 | LAMA2 | NM_000426 | 65 | 65 | 1        | 112         | 290  | 11525  | 58,21  | 94,6              |
| chr6 | 129371002 | 129371172 | LAMA2 | NM_000426 | 65 | 65 | 2        | 171         | 552  | 24799  | 145,02 | 64,3              |
| chr6 | 129380899 | 129381072 | LAMA2 | NM_000426 | 65 | 65 | 3        | 113         | 280  | 11790  | 67,76  | 100               |
| chr6 | 129419352 | 129419629 | LAMA2 | NM_000426 | 65 | 65 | 4        | 243         | 1869 | 80927  | 291,1  | 86                |
| chr6 | 129465026 | 129465244 | LAMA2 | NM_000426 | 65 | 65 | 5        | 180         | 447  | 20816  | 95,05  | 100               |
| chr6 | 129468027 | 129468209 | LAMA2 | NM_000426 | 65 | 65 | 6        | 90          | 582  | 25801  | 140,99 | 100               |
| chr6 | 129470043 | 129470267 | LAMA2 | NM_000426 | 65 | 65 | 7        | 118         | 355  | 15291  | 67,96  | 100               |
| chr6 | 129475662 | 129475865 | LAMA2 | NM_000426 | 65 | 65 | 8        | 179         | 194  | 8553   | 41,93  | 93,3              |
| chr6 | 129486700 | 129486903 | LAMA2 | NM_000426 | 65 | 65 | 9        | 100         | 204  | 9197   | 45,08  | 100               |
| chr6 | 129498905 | 129499093 | LAMA2 | NM_000426 | 65 | 65 | 10       | 161         | 651  | 26447  | 139,93 | 66,5              |
| chr6 | 129511262 | 129511456 | LAMA2 | NM_000426 | 65 | 65 | 11       | 141         | 807  | 34795  | 178,44 | 75,9              |
| chr6 | 129513763 | 129513936 | LAMA2 | NM_000426 | 65 | 65 | 12       | 174         | 212  | 8927   | 51,3   | 64,4              |
| chr6 | 129571198 | 129571407 | LAMA2 | NM_000426 | 65 | 65 | 13       | 102         | 502  | 22474  | 107,02 | 100               |
| chr6 | 129573174 | 129573365 | LAMA2 | NM_000426 | 65 | 65 | 14       | 212         | 195  | 8369   | 43,59  | 64,6              |
| chr6 | 129581802 | 129582026 | LAMA2 | NM_000426 | 65 | 65 | 15       | 112         | 1034 | 46036  | 204,6  | 100               |
| chr6 | 129588162 | 129588332 | LAMA2 | NM_000426 | 65 | 65 | 16       | 114         | 1015 | 42490  | 248,48 | 71,9              |
| chr6 | 129591678 | 129591857 | LAMA2 | NM_000426 | 65 | 65 | 17       | 128         | 765  | 32434  | 180,19 | 69,5              |
| chr6 | 129601223 | 129601402 | LAMA2 | NM_000426 | 65 | 65 | 18       | 87          | 219  | 9221   | 51,23  | 80,5              |
| chr6 | 129609051 | 129609272 | LAMA2 | NM_000426 | 65 | 65 | 19       | 212         | 522  | 22453  | 101,14 | 72,2              |
| chr6 | 129612684 | 129612896 | LAMA2 | NM_000426 | 65 | 65 | 20       | 107         | 210  | 9007   | 42,29  | 100               |
| chr6 | 129618879 | 129619088 | LAMA2 | NM_000426 | 65 | 65 | 21       | 181         | 387  | 16711  | 79,58  | 72,9              |
| chr6 | 129621833 | 129622063 | LAMA2 | NM_000426 | 65 | 65 | 22       | 137         | 434  | 18880  | 81,73  | 100               |
| chr6 | 129633953 | 129634245 | LAMA2 | NM_000426 | 65 | 65 | 23       | 237         | 934  | 40412  | 137,92 | 100               |
| chr6 | 129635696 | 129635905 | LAMA2 | NM_000426 | 65 | 65 | 24       | 144         | 196  | 9031   | 43     | 73,6              |
| chr6 | 129636543 | 129637318 | LAMA2 | NM_000426 | 65 | 65 | 25,26,27 | 180.189.134 | 1747 | 83349  | 107,41 | 100.0,100.0,100.0 |
| chr6 | 129641590 | 129641766 | LAMA2 | NM_000426 | 65 | 65 | 28       | 118         | 488  | 20618  | 116,49 | 71,2              |
| chr6 | 129649335 | 129649520 | LAMA2 | NM_000426 | 65 | 65 | 29       | 135         | 555  | 24240  | 130,32 | 72,6              |
| chr6 | 129663518 | 129663703 | LAMA2 | NM_000426 | 65 | 65 | 30       | 125         | 404  | 16793  | 90,28  | 76                |
| chr6 | 129670382 | 129670600 | LAMA2 | NM_000426 | 65 | 65 | 31       | 87          | 470  | 21047  | 96,11  | 100               |
| chr6 | 129674230 | 129674442 | LAMA2 | NM_000426 | 65 | 65 | 32       | 194         | 134  | 5665   | 26,6   | 69,1              |
| chr6 | 129687271 | 129687489 | LAMA2 | NM_000426 | 65 | 65 | 33       | 143         | 663  | 29027  | 132,54 | 88,1              |
| chr6 | 129690937 | 129691119 | LAMA2 | NM_000426 | 65 | 65 | 34       | 99          | 191  | 7643   | 41,77  | 83,8              |
| chr6 | 129704216 | 129704434 | LAMA2 | NM_000426 | 65 | 65 | 35       | 112         | 98   | 4336   | 19,8   | 100               |
| chr6 | 129712616 | 129712807 | LAMA2 | NM_000426 | 65 | 65 | 36       | 163         | 201  | 9389   | 48,9   | 100               |
| chr6 | 129714245 | 129714442 | LAMA2 | NM_000426 | 65 | 65 | 37       | 211         | 288  | 12260  | 61,92  | 73,9              |

|      |           |           |       |              |    |    |       |         |      |       |        |             |
|------|-----------|-----------|-------|--------------|----|----|-------|---------|------|-------|--------|-------------|
| chr6 | 129722335 | 129722517 | LAMA2 | NM_000426    | 65 | 65 | 38    | 117     | 234  | 9737  | 53,21  | 100         |
| chr6 | 129723393 | 129723581 | LAMA2 | NM_000426    | 65 | 65 | 39    | 164     | 206  | 8854  | 46,85  | 68,9        |
| chr6 | 129724934 | 129725137 | LAMA2 | NM_000426    | 65 | 65 | 40    | 139     | 328  | 13643 | 66,88  | 100         |
| chr6 | 129748844 | 129749041 | LAMA2 | NM_000426    | 65 | 65 | 41    | 103     | 305  | 13141 | 66,37  | 100         |
| chr6 | 129759784 | 129759969 | LAMA2 | NM_000426    | 65 | 65 | 42    | 117     | 324  | 14836 | 79,76  | 100         |
| chr6 | 129762018 | 129762218 | LAMA2 | NM_000426    | 65 | 65 | 43    | 183     | 852  | 36628 | 182,23 | 68,9        |
| chr6 | 129763247 | 129763441 | LAMA2 | NM_000426    | 65 | 65 | 44    | 6       | 125  | 4942  | 25,34  | 100         |
| chr6 | 129766731 | 129766928 | LAMA2 | NM_000426    | 65 | 65 | 45    | 155     | 200  | 7679  | 38,78  | 75,5        |
| chr6 | 129774134 | 129774331 | LAMA2 | NM_000426    | 65 | 65 | 46    | 144     | 244  | 10380 | 52,42  | 99,3        |
| chr6 | 129775260 | 129775460 | LAMA2 | NM_000426    | 65 | 65 | 47    | 134     | 222  | 9188  | 45,71  | 100         |
| chr6 | 129777531 | 129777713 | LAMA2 | NM_000426    | 65 | 65 | 48    | 160     | 1132 | 47660 | 260,44 | 68,1        |
| chr6 | 129781321 | 129781542 | LAMA2 | NM_000426    | 65 | 65 | 49    | 125     | 356  | 14336 | 64,58  | 100         |
| chr6 | 129785379 | 129785582 | LAMA2 | NM_000426    | 65 | 65 | 50    | 163     | 238  | 9909  | 48,57  | 90,8        |
| chr6 | 129786270 | 129786449 | LAMA2 | NM_000426    | 65 | 65 | 51    | 145     | 243  | 10550 | 58,61  | 100         |
| chr6 | 129794372 | 129794563 | LAMA2 | NM_000426    | 65 | 65 | 52    | 139     | 275  | 11377 | 59,26  | 90,6        |
| chr6 | 129796485 | 129796667 | LAMA2 | NM_000426    | 65 | 65 | 53    | 12      | 320  | 12897 | 70,48  | 100         |
| chr6 | 129799756 | 129799959 | LAMA2 | NM_000426    | 65 | 65 | 54    | 121     | 676  | 29590 | 145,05 | 100         |
| chr6 | 129802341 | 129802529 | LAMA2 | NM_000426    | 65 | 65 | 55    | 177     | 474  | 20851 | 110,32 | 68,9        |
| chr6 | 129807667 | 129807861 | LAMA2 | NM_000426    | 65 | 65 | 56    | 149     | 450  | 19179 | 98,35  | 67,8        |
| chr6 | 129813036 | 129813233 | LAMA2 | NM_000426    | 65 | 65 | 57    | 177     | 749  | 32112 | 162,18 | 100         |
| chr6 | 129813428 | 129813643 | LAMA2 | NM_000426    | 65 | 65 | 58    | 169     | 545  | 21877 | 101,28 | 100         |
| chr6 | 129823750 | 129823968 | LAMA2 | NM_000426    | 65 | 65 | 59    | 113     | 249  | 10876 | 49,66  | 100         |
| chr6 | 129824179 | 129824361 | LAMA2 | NM_000426    | 65 | 65 | 60    | 190     | 156  | 6918  | 37,8   | 66,3        |
| chr6 | 129826328 | 129826534 | LAMA2 | NM_000426    | 65 | 65 | 61    | 156     | 101  | 4169  | 20,14  | 100         |
| chr6 | 129828685 | 129828855 | LAMA2 | NM_000426    | 65 | 65 | 62    | 154     | 377  | 15044 | 87,98  | 66,9        |
| chr6 | 129833487 | 129833672 | LAMA2 | NM_000426    | 65 | 65 | 63    | 131     | 559  | 24292 | 130,6  | 100         |
| chr6 | 129835428 | 129835705 | LAMA2 | NM_000426    | 65 | 65 | 64    | 223     | 631  | 28028 | 100,82 | 84,3        |
| chr6 | 129837240 | 129837597 | LAMA2 | NM_000426    | 65 | 65 | 65    | 158     | 1126 | 52492 | 146,63 | 100         |
| chr6 | 131908706 | 131908995 | MED23 | NM_004830    | 29 | 29 | 29    | 168     | 968  | 45643 | 157,39 | 100         |
| chr6 | 131910620 | 131910844 | MED23 | NM_004830    | 29 | 29 | 28    | 132     | 316  | 13980 | 62,13  | 88,6        |
| chr6 | 131911370 | 131911555 | MED23 | NM_004830    | 29 | 29 | 27    | 121     | 579  | 24312 | 130,71 | 77,7        |
| chr6 | 131912408 | 131912584 | MED23 | NM_004830    | 29 | 29 | 26    | 215     | 51   | 2157  | 12,19  | 61,4        |
| chr6 | 131913427 | 131913627 | MED23 | NM_004830    | 29 | 29 | 25    | 73      | 428  | 18512 | 92,1   | 100         |
| chr6 | 131914146 | 131914373 | MED23 | NM_004830    | 29 | 29 | 24    | 166     | 244  | 10727 | 47,05  | 100         |
| chr6 | 131915219 | 131915511 | MED23 | NM_004830    | 29 | 29 | 23    | 237     | 1105 | 47856 | 163,33 | 100         |
| chr6 | 131917048 | 131917349 | MED23 | NM_004830    | 29 | 29 | 22    | 217     | 310  | 14596 | 48,33  | 100         |
| chr6 | 131917648 | 131917830 | MED23 | NM_004830    | 29 | 29 | 21    | 171     | 740  | 30999 | 169,39 | 100         |
| chr6 | 131919425 | 131919924 | MED23 | NM_004830    | 29 | 29 | 20,19 | 181.206 | 1846 | 84285 | 168,57 | 100.0,100.0 |
| chr6 | 131921109 | 131921309 | MED23 | NM_004830    | 29 | 29 | 18    | 125     | 145  | 6339  | 31,54  | 100         |
| chr6 | 131923327 | 131923554 | MED23 | NM_004830    | 29 | 29 | 17    | 164     | 554  | 24469 | 107,32 | 100         |
| chr6 | 131924111 | 131924332 | MED23 | NM_004830    | 29 | 29 | 16    | 175     | 576  | 24858 | 111,97 | 93,1        |
| chr6 | 131925312 | 131925509 | MED23 | NM_004830    | 29 | 29 | 15    | 143     | 225  | 10258 | 51,81  | 100         |
| chr6 | 131926332 | 131926627 | MED23 | NM_004830    | 29 | 29 | 14    | 246     | 261  | 11670 | 39,43  | 100         |
| chr6 | 131927606 | 131927776 | MED23 | NM_004830    | 29 | 29 | 13    | 146     | 450  | 19218 | 112,39 | 100         |
| chr6 | 131929048 | 131929224 | MED23 | NM_004830    | 29 | 29 | 12    | 144     | 351  | 13900 | 78,53  | 100         |
| chr6 | 131931119 | 131931310 | MED23 | NM_004830    | 29 | 29 | 11    | 201     | 892  | 38036 | 198,1  | 62,2        |
| chr6 | 131937009 | 131937179 | MED23 | NM_004830    | 29 | 29 | 10    | 96      | 114  | 4544  | 26,57  | 100         |
| chr6 | 131939505 | 131939705 | MED23 | NM_004830    | 29 | 29 | 9     | 113     | 547  | 23667 | 117,75 | 100         |
| chr6 | 131940889 | 131941104 | MED23 | NM_004830    | 29 | 29 | 8     | 70      | 142  | 6453  | 29,88  | 100         |
| chr6 | 131941688 | 131941888 | MED23 | NM_004830    | 29 | 29 | 7     | 102     | 211  | 8490  | 42,24  | 100         |
| chr6 | 131942942 | 131943139 | MED23 | NM_004830    | 29 | 29 | 6     | 99      | 519  | 21065 | 106,39 | 100         |
| chr6 | 131944479 | 131944664 | MED23 | NM_004830    | 29 | 29 | 5     | 112     | 933  | 40974 | 220,29 | 100         |
| chr6 | 131945936 | 131946133 | MED23 | NM_004830    | 29 | 29 | 4     | 125     | 258  | 10241 | 51,72  | 100         |
| chr6 | 131948497 | 131948792 | MED23 | NM_004830    | 29 | 29 | 3,2   | 88,32   | 404  | 18586 | 62,79  | 100.0,37.5  |
| chr6 | 131949073 | 131949344 | MED23 | NM_004830    | 29 | 29 | 1     | 39      | 1766 | 82899 | 304,78 | 100         |
| chr6 | 135606564 | 135606847 | AHI1  | NM_001134830 | 27 | 26 | 27    | 3       | 781  | 37108 | 130,66 | 100         |
| chr6 | 135611502 | 135611711 | AHI1  | NM_001134830 | 27 | 26 | 26    | 103     | 281  | 12403 | 59,06  | 100         |

|      |           |           |        |              |    |    |    |      |      |        |        |      |
|------|-----------|-----------|--------|--------------|----|----|----|------|------|--------|--------|------|
| chr6 | 135621593 | 135621811 | AH11   | NM_001134830 | 27 | 26 | 25 | 59   | 479  | 21910  | 100,05 | 100  |
| chr6 | 135639643 | 135639843 | AH11   | NM_001134830 | 27 | 26 | 24 | 98   | 57   | 1973   | 9,82   | 100  |
| chr6 | 135644280 | 135644477 | AH11   | NM_001134830 | 27 | 26 | 23 | 163  | 500  | 21736  | 109,78 | 100  |
| chr6 | 135679211 | 135679381 | AH11   | NM_001134830 | 27 | 26 | 22 | 56   | 637  | 26519  | 155,08 | 100  |
| chr6 | 135715843 | 135716105 | AH11   | NM_001134830 | 27 | 26 | 21 | 121  | 318  | 14639  | 55,66  | 100  |
| chr6 | 135725953 | 135726129 | AH11   | NM_001134830 | 27 | 26 | 20 | 27   | 471  | 20283  | 114,59 | 100  |
| chr6 | 135732477 | 135732668 | AH11   | NM_001134830 | 27 | 26 | 19 | 197  | 704  | 30706  | 159,93 | 92,9 |
| chr6 | 135748286 | 135748462 | AH11   | NM_001134830 | 27 | 26 | 18 | 141  | 491  | 19415  | 109,69 | 100  |
| chr6 | 135749707 | 135749901 | AH11   | NM_001134830 | 27 | 26 | 17 | 131  | 724  | 33910  | 173,9  | 100  |
| chr6 | 135750906 | 135751115 | AH11   | NM_001134830 | 27 | 26 | 16 | 119  | 413  | 18660  | 88,86  | 80,7 |
| chr6 | 135752334 | 135752537 | AH11   | NM_001134830 | 27 | 26 | 15 | 107  | 527  | 23746  | 116,4  | 100  |
| chr6 | 135754123 | 135754373 | AH11   | NM_001134830 | 27 | 26 | 14 | 230  | 900  | 42585  | 169,66 | 90,9 |
| chr6 | 135759446 | 135759634 | AH11   | NM_001134830 | 27 | 26 | 13 | 124  | 330  | 13595  | 71,93  | 98,4 |
| chr6 | 135763691 | 135763870 | AH11   | NM_001134830 | 27 | 26 | 12 | 133  | 78   | 3263   | 18,13  | 100  |
| chr6 | 135768109 | 135768321 | AH11   | NM_001134830 | 27 | 26 | 11 | 153  | 510  | 22441  | 105,36 | 100  |
| chr6 | 135769419 | 135769628 | AH11   | NM_001134830 | 27 | 26 | 10 | 186  | 348  | 14316  | 68,17  | 100  |
| chr6 | 135774395 | 135774607 | AH11   | NM_001134830 | 27 | 26 | 9  | 96   | 484  | 19544  | 91,76  | 100  |
| chr6 | 135776852 | 135777067 | AH11   | NM_001134830 | 27 | 26 | 8  | 193  | 101  | 4266   | 19,75  | 100  |
| chr6 | 135778642 | 135778904 | AH11   | NM_001134830 | 27 | 26 | 7  | 220  | 629  | 29447  | 111,97 | 95,5 |
| chr6 | 135784255 | 135784437 | AH11   | NM_001134830 | 27 | 26 | 6  | 182  | 216  | 9478   | 51,79  | 96,2 |
| chr6 | 135786864 | 135787464 | AH11   | NM_001134830 | 27 | 26 | 5  | 560  | 2882 | 138444 | 230,36 | 91,6 |
| chr6 | 135788707 | 135788916 | AH11   | NM_001134830 | 27 | 26 | 4  | 54   | 234  | 9633   | 45,87  | 100  |
| chr6 | 135811667 | 135811941 | AH11   | NM_001134830 | 27 | 26 | 3  | 125  | 379  | 16944  | 61,61  | 100  |
| chr6 | 135813349 | 135813528 | AH11   | NM_001134830 | 27 | 26 | 2  | 10   | 202  | 8206   | 45,59  | 100  |
| chr6 | 137143650 | 137143862 | PEX7   | NM_000288    | 10 | 10 | 1  | 130  | 67   | 2890   | 13,57  | 45,4 |
| chr6 | 137146265 | 137146435 | PEX7   | NM_000288    | 10 | 10 | 2  | 58   | 230  | 10112  | 59,13  | 100  |
| chr6 | 137147413 | 137147595 | PEX7   | NM_000288    | 10 | 10 | 3  | 151  | 617  | 23838  | 130,26 | 92,1 |
| chr6 | 137166694 | 137166891 | PEX7   | NM_000288    | 10 | 10 | 4  | 78   | 204  | 8634   | 43,61  | 100  |
| chr6 | 137167179 | 137167358 | PEX7   | NM_000288    | 10 | 10 | 5  | 109  | 398  | 16364  | 90,91  | 100  |
| chr6 | 137187687 | 137187875 | PEX7   | NM_000288    | 10 | 10 | 6  | 107  | 422  | 18083  | 95,68  | 100  |
| chr6 | 137190948 | 137191166 | PEX7   | NM_000288    | 10 | 10 | 7  | 114  | 398  | 17664  | 80,66  | 100  |
| chr6 | 137193275 | 137193454 | PEX7   | NM_000288    | 10 | 10 | 8  | 56   | 307  | 13786  | 76,59  | 100  |
| chr6 | 137219256 | 137219468 | PEX7   | NM_000288    | 10 | 10 | 9  | 100  | 598  | 25776  | 121,01 | 100  |
| chr6 | 137234494 | 137234774 | PEX7   | NM_000288    | 10 | 10 | 10 | 69   | 673  | 30507  | 108,57 | 100  |
| chr6 | 146350510 | 146351448 | GRM1   | NM_000838    | 9  | 8  | 2  | 700  | 3786 | 185593 | 197,65 | 100  |
| chr6 | 146480403 | 146480674 | GRM1   | NM_000838    | 9  | 8  | 3  | 250  | 450  | 20640  | 75,88  | 76,4 |
| chr6 | 146625661 | 146625929 | GRM1   | NM_000838    | 9  | 8  | 4  | 236  | 894  | 39646  | 147,38 | 77,5 |
| chr6 | 146673359 | 146673660 | GRM1   | NM_000838    | 9  | 8  | 5  | 247  | 399  | 17690  | 58,58  | 100  |
| chr6 | 146678654 | 146678860 | GRM1   | NM_000838    | 9  | 8  | 6  | 169  | 216  | 9321   | 45,03  | 100  |
| chr6 | 146707994 | 146708194 | GRM1   | NM_000838    | 9  | 8  | 7  | 127  | 634  | 26917  | 133,92 | 100  |
| chr6 | 146719840 | 146720754 | GRM1   | NM_000838    | 9  | 8  | 8  | 931  | 6407 | 312678 | 341,72 | 91,3 |
| chr6 | 146754967 | 146756047 | GRM1   | NM_000838    | 9  | 8  | 9  | 925  | 4115 | 194543 | 179,97 | 100  |
| chr6 | 151726211 | 151726464 | RMND1  | NM_017909    | 12 | 11 | 12 | 33   | 194  | 8882   | 34,97  | 100  |
| chr6 | 151726776 | 151726994 | RMND1  | NM_017909    | 12 | 11 | 11 | 117  | 167  | 6614   | 30,2   | 100  |
| chr6 | 151738358 | 151738546 | RMND1  | NM_017909    | 12 | 11 | 10 | 121  | 278  | 12197  | 64,53  | 100  |
| chr6 | 151742362 | 151742544 | RMND1  | NM_017909    | 12 | 11 | 9  | 77   | 236  | 10495  | 57,35  | 100  |
| chr6 | 151743532 | 151743747 | RMND1  | NM_017909    | 12 | 11 | 8  | 65   | 46   | 1760   | 8,15   | 100  |
| chr6 | 151744585 | 151744782 | RMND1  | NM_017909    | 12 | 11 | 7  | 107  | 641  | 26807  | 135,39 | 100  |
| chr6 | 151748560 | 151748766 | RMND1  | NM_017909    | 12 | 11 | 6  | 101  | 529  | 23543  | 113,73 | 100  |
| chr6 | 151751264 | 151751458 | RMND1  | NM_017909    | 12 | 11 | 5  | 40   | 100  | 4293   | 22,02  | 100  |
| chr6 | 151754173 | 151754373 | RMND1  | NM_017909    | 12 | 11 | 4  | 76   | 603  | 25397  | 126,35 | 100  |
| chr6 | 151757504 | 151757686 | RMND1  | NM_017909    | 12 | 11 | 3  | 109  | 489  | 20860  | 113,99 | 97,2 |
| chr6 | 151766648 | 151766768 | RMND1  | NM_017909    | 12 | 11 | 2  | 504  | 134  | 5321   | 43,98  | 24   |
| chr6 | 151766915 | 151767035 | RMND1  | NM_017909    | 12 | 11 | 2  | 504  | 71   | 2764   | 22,84  | 6,3  |
| chr6 | 157099102 | 157100689 | ARID1B | NM_017519    | 19 | 19 | 1  | 1542 | 137  | 6125   | 3,86   | 97,5 |
| chr6 | 157150297 | 157150497 | ARID1B | NM_017519    | 19 | 19 | 2  | 195  | 271  | 11883  | 59,12  | 70,3 |
| chr6 | 157222438 | 157222608 | ARID1B | NM_017519    | 19 | 19 | 3  | 150  | 357  | 15951  | 93,28  | 66   |

|      |           |           |        |              |    |    |     |         |      |        |        |           |
|------|-----------|-----------|--------|--------------|----|----|-----|---------|------|--------|--------|-----------|
| chr6 | 157256548 | 157256748 | ARID1B | NM_017519    | 19 | 19 | 4   | 111     | 656  | 28952  | 144,04 | 100       |
| chr6 | 157405717 | 157406009 | ARID1B | NM_017519    | 19 | 19 | 5   | 244     | 703  | 31136  | 106,27 | 87,7      |
| chr6 | 157431625 | 157431804 | ARID1B | NM_017519    | 19 | 19 | 6   | 90      | 165  | 6425   | 35,69  | 78,9      |
| chr6 | 157454100 | 157454294 | ARID1B | NM_017519    | 19 | 19 | 7   | 180     | 430  | 17842  | 91,5   | 73,9      |
| chr6 | 157469679 | 157470095 | ARID1B | NM_017519    | 19 | 19 | 8   | 328     | 1088 | 51026  | 122,36 | 100       |
| chr6 | 157488080 | 157488274 | ARID1B | NM_017519    | 19 | 19 | 9   | 146     | 460  | 20332  | 104,27 | 69,2      |
| chr6 | 157495021 | 157495221 | ARID1B | NM_017519    | 19 | 19 | 10  | 110     | 241  | 9765   | 48,58  | 72,7      |
| chr6 | 157502173 | 157502382 | ARID1B | NM_017519    | 19 | 19 | 11  | 210     | 780  | 33416  | 159,12 | 66,7      |
| chr6 | 157505272 | 157505810 | ARID1B | NM_017519    | 19 | 19 | 12  | 205     | 737  | 33804  | 62,72  | 100       |
| chr6 | 157510810 | 157511010 | ARID1B | NM_017519    | 19 | 19 | 13  | 139     | 319  | 13471  | 67,02  | 75,5      |
| chr6 | 157511097 | 157511291 | ARID1B | NM_017519    | 19 | 19 | 14  | 173     | 1146 | 44626  | 228,85 | 69,4      |
| chr6 | 157517210 | 157517398 | ARID1B | NM_017519    | 19 | 19 | 15  | 151     | 338  | 15048  | 79,62  | 66,2      |
| chr6 | 157519838 | 157520017 | ARID1B | NM_017519    | 19 | 19 | 16  | 97      | 98   | 4154   | 23,08  | 75,3      |
| chr6 | 157521876 | 157522710 | ARID1B | NM_017519    | 19 | 19 | 17  | 784     | 2602 | 124718 | 149,36 | 95,3      |
| chr6 | 157524919 | 157525143 | ARID1B | NM_017519    | 19 | 19 | 18  | 131     | 473  | 21190  | 94,18  | 100       |
| chr6 | 157527221 | 157529101 | ARID1B | NM_017519    | 19 | 19 | 19  | 1725    | 6760 | 322999 | 171,72 | 100       |
| chr6 | 158532246 | 158532621 | SERAC1 | NM_032861    | 17 | 16 | 17  | 137     | 572  | 25477  | 67,76  | 100       |
| chr6 | 158534422 | 158534622 | SERAC1 | NM_032861    | 17 | 16 | 16  | 144     | 355  | 15512  | 77,17  | 98,6      |
| chr6 | 158535792 | 158536051 | SERAC1 | NM_032861    | 17 | 16 | 15  | 183     | 412  | 18645  | 71,71  | 100       |
| chr6 | 158537126 | 158537332 | SERAC1 | NM_032861    | 17 | 16 | 14  | 98      | 379  | 16672  | 80,54  | 100       |
| chr6 | 158538614 | 158538894 | SERAC1 | NM_032861    | 17 | 16 | 13  | 95      | 1706 | 81748  | 290,92 | 100       |
| chr6 | 158540076 | 158540255 | SERAC1 | NM_032861    | 17 | 16 | 12  | 142     | 307  | 12487  | 69,37  | 89,4      |
| chr6 | 158541368 | 158541568 | SERAC1 | NM_032861    | 17 | 16 | 11  | 151     | 642  | 27095  | 134,8  | 74,2      |
| chr6 | 158549135 | 158549320 | SERAC1 | NM_032861    | 17 | 16 | 10  | 163     | 464  | 19218  | 103,32 | 100       |
| chr6 | 158551403 | 158551576 | SERAC1 | NM_032861    | 17 | 16 | 9   | 114     | 183  | 8280   | 47,59  | 100       |
| chr6 | 158563985 | 158564182 | SERAC1 | NM_032861    | 17 | 16 | 8   | 129     | 281  | 12106  | 61,14  | 73,6      |
| chr6 | 158565318 | 158565506 | SERAC1 | NM_032861    | 17 | 16 | 7   | 122     | 256  | 9294   | 49,17  | 100       |
| chr6 | 158567821 | 158567994 | SERAC1 | NM_032861    | 17 | 16 | 6   | 132     | 741  | 33754  | 193,99 | 94,7      |
| chr6 | 158569814 | 158569996 | SERAC1 | NM_032861    | 17 | 16 | 5   | 90      | 266  | 10856  | 59,32  | 100       |
| chr6 | 158571479 | 158571679 | SERAC1 | NM_032861    | 17 | 16 | 4   | 137     | 204  | 9156   | 45,55  | 100       |
| chr6 | 158576201 | 158576392 | SERAC1 | NM_032861    | 17 | 16 | 3   | 37      | 417  | 19209  | 100,05 | 100       |
| chr6 | 158579249 | 158579443 | SERAC1 | NM_032861    | 17 | 16 | 2   | 91      | 386  | 17195  | 88,18  | 100       |
| chr6 | 158591421 | 158591603 | GTF2H5 | NM_207118    | 3  | 2  | 2   | 35      | 218  | 9631   | 52,63  | 100       |
| chr6 | 158612933 | 158613118 | GTF2H5 | NM_207118    | 3  | 2  | 3   | 181     | 107  | 4486   | 24,12  | 60,8      |
| chr6 | 158613188 | 158613308 | GTF2H5 | NM_207118    | 3  | 2  | 3   | 181     | 287  | 10108  | 83,54  | 1,1       |
| chr7 | 5567471   | 5567641   | ACTB   | NM_001101    | 6  | 5  | 6,5 | 144.182 | 42   | 1139   | 6,66   | 36,1,3.8  |
| chr7 | 5567782   | 5567961   | ACTB   | NM_001101    | 6  | 5  | 5,4 | 182.439 | 471  | 18948  | 105,27 | 19,2,11.4 |
| chr7 | 5568271   | 5568391   | ACTB   | NM_001101    | 6  | 5  | 4   | 439     | 98   | 3998   | 33,04  | 18,2      |
| chr7 | 5569000   | 5569170   | ACTB   | NM_001101    | 6  | 5  | 3,2 | 240.123 | 150  | 5921   | 34,63  | 13.3,4.1  |
| chr7 | 5569234   | 5569511   | ACTB   | NM_001101    | 6  | 5  | 2   | 123     | 29   | 1176   | 4,23   | 44,7      |
| chr7 | 16131220  | 16131432  | ISPD   | NM_001101426 | 10 | 10 | 10  | 105     | 232  | 9633   | 45,23  | 100       |
| chr7 | 16255596  | 16255796  | ISPD   | NM_001101426 | 10 | 10 | 9   | 132     | 149  | 6776   | 33,71  | 80,3      |
| chr7 | 16297969  | 16298145  | ISPD   | NM_001101426 | 10 | 10 | 8   | 93      | 476  | 21174  | 119,63 | 100       |
| chr7 | 16298508  | 16298711  | ISPD   | NM_001101426 | 10 | 10 | 7   | 93      | 430  | 18678  | 91,56  | 100       |
| chr7 | 16317732  | 16317932  | ISPD   | NM_001101426 | 10 | 10 | 6   | 98      | 280  | 11566  | 57,54  | 100       |
| chr7 | 16340956  | 16341168  | ISPD   | NM_001101426 | 10 | 10 | 5   | 46      | 220  | 8815   | 41,38  | 100       |
| chr7 | 16348159  | 16348359  | ISPD   | NM_001101426 | 10 | 10 | 4   | 105     | 394  | 16977  | 84,46  | 89,5      |
| chr7 | 16415625  | 16415816  | ISPD   | NM_001101426 | 10 | 10 | 3   | 150     | 848  | 35566  | 185,24 | 66,7      |
| chr7 | 16445608  | 16445909  | ISPD   | NM_001101426 | 10 | 10 | 2   | 277     | 1178 | 55391  | 183,41 | 80,9      |
| chr7 | 16460633  | 16460910  | ISPD   | NM_001101426 | 10 | 10 | 1   | 257     | 14   | 531    | 1,91   | 85,6      |
| chr7 | 27133978  | 27134356  | HOXA1  | NM_005522    | 2  | 2  | 2   | 356     | 831  | 37929  | 100,08 | 83,7      |
| chr7 | 27134821  | 27135593  | HOXA1  | NM_005522    | 2  | 2  | 1   | 652     | 2163 | 96530  | 124,88 | 100       |
| chr7 | 33185875  | 33186063  | BBS9   | NM_198428    | 23 | 22 | 2   | 112     | 214  | 9535   | 50,45  | 91,1      |
| chr7 | 33192296  | 33192490  | BBS9   | NM_198428    | 23 | 22 | 3   | 151     | 205  | 8693   | 44,58  | 100       |
| chr7 | 33195196  | 33195366  | BBS9   | NM_198428    | 23 | 22 | 4   | 65      | 74   | 2834   | 16,57  | 100       |
| chr7 | 33217010  | 33217204  | BBS9   | NM_198428    | 23 | 22 | 5   | 114     | 265  | 10972  | 56,27  | 100       |
| chr7 | 33296825  | 33297034  | BBS9   | NM_198428    | 23 | 22 | 6   | 175     | 262  | 11570  | 55,1   | 100       |

|      |          |          |        |           |    |    |       |         |      |        |        |             |
|------|----------|----------|--------|-----------|----|----|-------|---------|------|--------|--------|-------------|
| chr7 | 33303876 | 33304058 | BBS9   | NM_198428 | 23 | 22 | 7     | 85      | 138  | 6039   | 33     | 100         |
| chr7 | 33312612 | 33312803 | BBS9   | NM_198428 | 23 | 22 | 8     | 184     | 211  | 8536   | 44,46  | 97,8        |
| chr7 | 33313439 | 33313627 | BBS9   | NM_198428 | 23 | 22 | 9     | 130     | 446  | 19232  | 101,76 | 100         |
| chr7 | 33376016 | 33376210 | BBS9   | NM_198428 | 23 | 22 | 10    | 182     | 120  | 4929   | 25,28  | 86,8        |
| chr7 | 33380509 | 33380703 | BBS9   | NM_198428 | 23 | 22 | 11    | 77      | 435  | 18427  | 94,5   | 100         |
| chr7 | 33384107 | 33384319 | BBS9   | NM_198428 | 23 | 22 | 12    | 54      | 175  | 7245   | 34,01  | 100         |
| chr7 | 33388650 | 33388832 | BBS9   | NM_198428 | 23 | 22 | 13    | 103     | 497  | 21204  | 115,87 | 100         |
| chr7 | 33390576 | 33391004 | BBS9   | NM_198428 | 23 | 22 | 14    | 105     | 644  | 30783  | 71,76  | 100         |
| chr7 | 33392362 | 33392544 | BBS9   | NM_198428 | 23 | 22 | 15    | 15      | 1073 | 44402  | 242,63 | 100         |
| chr7 | 33397412 | 33397692 | BBS9   | NM_198428 | 23 | 22 | 16    | 141     | 602  | 28073  | 99,9   | 100         |
| chr7 | 33407290 | 33407490 | BBS9   | NM_198428 | 23 | 22 | 17    | 96      | 347  | 15777  | 78,49  | 100         |
| chr7 | 33423269 | 33423451 | BBS9   | NM_198428 | 23 | 22 | 18    | 173     | 208  | 8487   | 46,38  | 100         |
| chr7 | 33427591 | 33427788 | BBS9   | NM_198428 | 23 | 22 | 19    | 153     | 603  | 26640  | 134,55 | 100         |
| chr7 | 33545008 | 33545196 | BBS9   | NM_198428 | 23 | 22 | 20    | 183     | 362  | 15864  | 83,94  | 66,7        |
| chr7 | 33573604 | 33573890 | BBS9   | NM_198428 | 23 | 22 | 21    | 223     | 1614 | 72824  | 253,74 | 83          |
| chr7 | 33644454 | 33644977 | BBS9   | NM_198428 | 23 | 22 | 22,23 | 111,32  | 1074 | 51230  | 97,77  | 100.0,100.0 |
| chr7 | 40172563 | 40172935 | MPLKIP | NM_138701 | 2  | 2  | 2     | 201     | 410  | 19290  | 51,72  | 100         |
| chr7 | 40173815 | 40174267 | MPLKIP | NM_138701 | 2  | 2  | 1     | 339     | 322  | 12975  | 28,64  | 100         |
| chr7 | 42003793 | 42006227 | GLI3   | NM_000168 | 15 | 14 | 15    | 2312    | 5356 | 256063 | 105,16 | 99,5        |
| chr7 | 42007108 | 42007468 | GLI3   | NM_000168 | 15 | 14 | 14    | 328     | 1269 | 58947  | 163,29 | 83,8        |
| chr7 | 42011985 | 42012277 | GLI3   | NM_000168 | 15 | 14 | 13    | 291     | 509  | 22931  | 78,26  | 83,2        |
| chr7 | 42017201 | 42017383 | GLI3   | NM_000168 | 15 | 14 | 12    | 165     | 343  | 15229  | 83,22  | 73,3        |
| chr7 | 42018229 | 42018417 | GLI3   | NM_000168 | 15 | 14 | 11    | 150     | 148  | 6550   | 34,66  | 79,3        |
| chr7 | 42063102 | 42063308 | GLI3   | NM_000168 | 15 | 14 | 10    | 141     | 137  | 6245   | 30,17  | 75,2        |
| chr7 | 42064894 | 42065091 | GLI3   | NM_000168 | 15 | 14 | 9     | 114     | 272  | 11873  | 59,96  | 72,8        |
| chr7 | 42065852 | 42066079 | GLI3   | NM_000168 | 15 | 14 | 8     | 214     | 145  | 6120   | 26,84  | 74,8        |
| chr7 | 42079598 | 42079795 | GLI3   | NM_000168 | 15 | 14 | 7     | 202     | 808  | 35964  | 181,64 | 78,7        |
| chr7 | 42084892 | 42085098 | GLI3   | NM_000168 | 15 | 14 | 6     | 147     | 1096 | 49403  | 238,66 | 78,9        |
| chr7 | 42088152 | 42088352 | GLI3   | NM_000168 | 15 | 14 | 5     | 206     | 171  | 7201   | 35,83  | 69,9        |
| chr7 | 42116258 | 42116434 | GLI3   | NM_000168 | 15 | 14 | 4     | 106     | 300  | 11795  | 66,64  | 79,2        |
| chr7 | 42187820 | 42188115 | GLI3   | NM_000168 | 15 | 14 | 3     | 243     | 749  | 35185  | 118,87 | 100         |
| chr7 | 42262702 | 42262905 | GLI3   | NM_000168 | 15 | 14 | 2     | 124     | 204  | 8662   | 42,46  | 100         |
| chr7 | 65425796 | 65426153 | GUSB   | NM_000181 | 12 | 12 | 12    | 167     | 489  | 22647  | 63,26  | 100         |
| chr7 | 65429202 | 65429322 | GUSB   | NM_000181 | 12 | 12 | 11    | 136     | 231  | 8419   | 69,58  | 9,6         |
| chr7 | 65432657 | 65432833 | GUSB   | NM_000181 | 12 | 12 | 10    | 177     | 735  | 30145  | 170,31 | 65,5        |
| chr7 | 65435255 | 65435375 | GUSB   | NM_000181 | 12 | 12 | 9     | 85      | 82   | 3151   | 26,04  | 100         |
| chr7 | 65439194 | 65439631 | GUSB   | NM_000181 | 12 | 12 | 8,7   | 147.179 | 665  | 31094  | 70,99  | 100.0,66.5  |
| chr7 | 65440898 | 65441246 | GUSB   | NM_000181 | 12 | 12 | 5     | 188     | 1110 | 51564  | 147,75 | 100         |
| chr7 | 65444506 | 65444626 | GUSB   | NM_000181 | 12 | 12 | 4     | 143     | 127  | 3969   | 32,8   | 16,1        |
| chr7 | 65444660 | 65444830 | GUSB   | NM_000181 | 12 | 12 | 3     | 185     | 202  | 8347   | 48,81  | 63,2        |
| chr7 | 65445263 | 65445448 | GUSB   | NM_000181 | 12 | 12 | 2     | 186     | 157  | 6565   | 35,3   | 72          |
| chr7 | 65447024 | 65447224 | GUSB   | NM_000181 | 12 | 12 | 1     | 210     | 9    | 320    | 1,59   | 70          |
| chr7 | 65540902 | 65541170 | ASL    | NM_000048 | 17 | 16 | 2     | 12      | 41   | 1913   | 7,11   | 100         |
| chr7 | 65546846 | 65547061 | ASL    | NM_000048 | 17 | 16 | 3     | 195     | 257  | 11198  | 51,84  | 71,3        |
| chr7 | 65547239 | 65547427 | ASL    | NM_000048 | 17 | 16 | 4     | 84      | 126  | 5722   | 30,28  | 86,9        |
| chr7 | 65547813 | 65548081 | ASL    | NM_000048 | 17 | 16 | 5,6   | 57,98   | 275  | 11753  | 43,69  | 100.0,18.4  |
| chr7 | 65551505 | 65551794 | ASL    | NM_000048 | 17 | 16 | 7,8   | 78,78   | 293  | 12785  | 44,09  | 100.0,82.1  |
| chr7 | 65552300 | 65552521 | ASL    | NM_000048 | 17 | 16 | 9     | 53      | 203  | 8723   | 39,29  | 100         |
| chr7 | 65552709 | 65552921 | ASL    | NM_000048 | 17 | 16 | 10    | 63      | 728  | 33843  | 158,89 | 100         |
| chr7 | 65553752 | 65554257 | ASL    | NM_000048 | 17 | 16 | 11,12 | 115,85  | 1260 | 60065  | 118,71 | 100.0,100.0 |
| chr7 | 65554555 | 65554728 | ASL    | NM_000048 | 17 | 16 | 14    | 84      | 142  | 5845   | 33,59  | 100         |
| chr7 | 65556938 | 65557117 | ASL    | NM_000048 | 17 | 16 | 15    | 81      | 290  | 12974  | 72,08  | 100         |
| chr7 | 65557543 | 65557998 | ASL    | NM_000048 | 17 | 16 | 16,17 | 107.145 | 340  | 15436  | 33,85  | 100.0,100.0 |
| chr7 | 66093944 | 66094197 | KCTD7  | NM_153033 | 4  | 4  | 1     | 144     | 25   | 1040   | 4,09   | 100         |
| chr7 | 66098315 | 66098518 | KCTD7  | NM_153033 | 4  | 4  | 2     | 170     | 122  | 4500   | 22,06  | 68,8        |
| chr7 | 66103153 | 66103356 | KCTD7  | NM_153033 | 4  | 4  | 3     | 179     | 702  | 30152  | 147,8  | 65,4        |
| chr7 | 66103812 | 66104320 | KCTD7  | NM_153033 | 4  | 4  | 4     | 377     | 1534 | 72944  | 143,31 | 100         |

|      |           |           |      |           |    |    |       |         |      |        |        |             |
|------|-----------|-----------|------|-----------|----|----|-------|---------|------|--------|--------|-------------|
| chr7 | 92116628  | 92116831  | PEX1 | NM_000466 | 24 | 24 | 24    | 85      | 166  | 7628   | 37,39  | 71,8        |
| chr7 | 92118574  | 92118768  | PEX1 | NM_000466 | 24 | 24 | 23    | 131     | 195  | 8361   | 42,88  | 100         |
| chr7 | 92118966  | 92119163  | PEX1 | NM_000466 | 24 | 24 | 22    | 198     | 259  | 10820  | 54,65  | 68,7        |
| chr7 | 92120566  | 92120852  | PEX1 | NM_000466 | 24 | 24 | 21    | 231     | 642  | 28274  | 98,52  | 100         |
| chr7 | 92122213  | 92122475  | PEX1 | NM_000466 | 24 | 24 | 20    | 177     | 442  | 21068  | 80,11  | 100         |
| chr7 | 92123648  | 92124002  | PEX1 | NM_000466 | 24 | 24 | 19,18 | 104.143 | 861  | 39953  | 112,54 | 60.6,100.0  |
| chr7 | 92125937  | 92126113  | PEX1 | NM_000466 | 24 | 24 | 17    | 65      | 76   | 3453   | 19,51  | 100         |
| chr7 | 92128996  | 92129169  | PEX1 | NM_000466 | 24 | 24 | 16    | 135     | 176  | 7588   | 43,61  | 100         |
| chr7 | 92130791  | 92131009  | PEX1 | NM_000466 | 24 | 24 | 15    | 167     | 388  | 16344  | 74,63  | 100         |
| chr7 | 92131168  | 92131362  | PEX1 | NM_000466 | 24 | 24 | 14    | 190     | 463  | 20156  | 103,36 | 83,7        |
| chr7 | 92132316  | 92132501  | PEX1 | NM_000466 | 24 | 24 | 13    | 155     | 487  | 20288  | 109,08 | 94,8        |
| chr7 | 92134105  | 92134281  | PEX1 | NM_000466 | 24 | 24 | 12    | 171     | 1624 | 66467  | 375,52 | 65,5        |
| chr7 | 92135488  | 92135664  | PEX1 | NM_000466 | 24 | 24 | 11    | 97      | 471  | 19290  | 108,98 | 100         |
| chr7 | 92136258  | 92136488  | PEX1 | NM_000466 | 24 | 24 | 10    | 133     | 452  | 20938  | 90,64  | 100         |
| chr7 | 92138619  | 92138825  | PEX1 | NM_000466 | 24 | 24 | 9     | 83      | 498  | 19972  | 96,48  | 100         |
| chr7 | 92140170  | 92140364  | PEX1 | NM_000466 | 24 | 24 | 8     | 104     | 197  | 7985   | 40,95  | 100         |
| chr7 | 92140867  | 92141043  | PEX1 | NM_000466 | 24 | 24 | 7     | 124     | 205  | 8742   | 49,39  | 100         |
| chr7 | 92143103  | 92143285  | PEX1 | NM_000466 | 24 | 24 | 6     | 120     | 222  | 9259   | 50,6   | 100         |
| chr7 | 92146636  | 92147624  | PEX1 | NM_000466 | 24 | 24 | 5,4   | 767.115 | 2581 | 119790 | 121,12 | 94.0,100.0  |
| chr7 | 92148229  | 92148405  | PEX1 | NM_000466 | 24 | 24 | 3     | 84      | 262  | 11739  | 66,32  | 100         |
| chr7 | 92151381  | 92151593  | PEX1 | NM_000466 | 24 | 24 | 2     | 144     | 1066 | 45606  | 214,11 | 100         |
| chr7 | 92157582  | 92157859  | PEX1 | NM_000466 | 24 | 24 | 1     | 129     | 9    | 407    | 1,46   | 100         |
| chr7 | 103113172 | 103113464 | RELN | NM_005045 | 65 | 65 | 65,64 | 98,5    | 454  | 20590  | 70,27  | 100.0,100.0 |
| chr7 | 103123292 | 103123504 | RELN | NM_005045 | 65 | 65 | 63    | 99      | 1181 | 51539  | 241,97 | 100         |
| chr7 | 103124026 | 103124223 | RELN | NM_005045 | 65 | 65 | 62    | 198     | 83   | 3821   | 19,3   | 62,6        |
| chr7 | 103126598 | 103126899 | RELN | NM_005045 | 65 | 65 | 61    | 220     | 679  | 30528  | 101,09 | 100         |
| chr7 | 103130095 | 103130313 | RELN | NM_005045 | 65 | 65 | 60    | 158     | 475  | 19677  | 89,85  | 79,1        |
| chr7 | 103131140 | 103131364 | RELN | NM_005045 | 65 | 65 | 59    | 162     | 276  | 12203  | 54,24  | 84,6        |
| chr7 | 103132348 | 103132521 | RELN | NM_005045 | 65 | 65 | 58    | 74      | 143  | 5705   | 32,79  | 100         |
| chr7 | 103136124 | 103136333 | RELN | NM_005045 | 65 | 65 | 57    | 176     | 216  | 9397   | 44,75  | 93,2        |
| chr7 | 103136905 | 103137185 | RELN | NM_005045 | 65 | 65 | 56    | 243     | 989  | 46466  | 165,36 | 87,7        |
| chr7 | 103138307 | 103138723 | RELN | NM_005045 | 65 | 65 | 55,54 | 107.176 | 850  | 40265  | 96,56  | 62.6,100.0  |
| chr7 | 103141243 | 103141440 | RELN | NM_005045 | 65 | 65 | 53    | 178     | 1451 | 63966  | 323,06 | 71,3        |
| chr7 | 103143439 | 103143654 | RELN | NM_005045 | 65 | 65 | 52    | 215     | 392  | 16844  | 77,98  | 89,3        |
| chr7 | 103151268 | 103151477 | RELN | NM_005045 | 65 | 65 | 51    | 155     | 775  | 34865  | 166,02 | 100         |
| chr7 | 103155685 | 103155962 | RELN | NM_005045 | 65 | 65 | 50    | 257     | 404  | 18551  | 66,73  | 79,4        |
| chr7 | 103159734 | 103159934 | RELN | NM_005045 | 65 | 65 | 49    | 194     | 366  | 15822  | 78,72  | 85,1        |
| chr7 | 103162508 | 103162732 | RELN | NM_005045 | 65 | 65 | 48    | 178     | 334  | 15189  | 67,51  | 78,1        |
| chr7 | 103163882 | 103164067 | RELN | NM_005045 | 65 | 65 | 47    | 141     | 675  | 30954  | 166,42 | 68,8        |
| chr7 | 103175740 | 103175961 | RELN | NM_005045 | 65 | 65 | 46    | 169     | 169  | 7022   | 31,63  | 100         |
| chr7 | 103179524 | 103179804 | RELN | NM_005045 | 65 | 65 | 45    | 250     | 1298 | 58690  | 208,86 | 100         |
| chr7 | 103180707 | 103180987 | RELN | NM_005045 | 65 | 65 | 44    | 259     | 928  | 43724  | 155,6  | 75,7        |
| chr7 | 103183154 | 103183336 | RELN | NM_005045 | 65 | 65 | 43    | 148     | 354  | 15123  | 82,64  | 100         |
| chr7 | 103185558 | 103185865 | RELN | NM_005045 | 65 | 65 | 42    | 221     | 680  | 28474  | 92,45  | 100         |
| chr7 | 103191533 | 103191840 | RELN | NM_005045 | 65 | 65 | 41    | 230     | 566  | 24473  | 79,46  | 91,7        |
| chr7 | 103193903 | 103194260 | RELN | NM_005045 | 65 | 65 | 40,39 | 103.172 | 717  | 31008  | 86,61  | 100.0,89.5  |
| chr7 | 103197429 | 103197614 | RELN | NM_005045 | 65 | 65 | 38    | 183     | 122  | 5092   | 27,38  | 97,3        |
| chr7 | 103198299 | 103198487 | RELN | NM_005045 | 65 | 65 | 37    | 85      | 611  | 26489  | 140,15 | 89,4        |
| chr7 | 103201921 | 103202334 | RELN | NM_005045 | 65 | 65 | 36,35 | 178.141 | 1350 | 61452  | 148,43 | 100.0,53.2  |
| chr7 | 103205757 | 103206031 | RELN | NM_005045 | 65 | 65 | 34    | 274     | 957  | 45235  | 164,49 | 88,3        |
| chr7 | 103206694 | 103206894 | RELN | NM_005045 | 65 | 65 | 33    | 189     | 328  | 13719  | 68,25  | 87,8        |
| chr7 | 103207101 | 103207295 | RELN | NM_005045 | 65 | 65 | 32    | 159     | 260  | 10839  | 55,58  | 66,7        |
| chr7 | 103212547 | 103212732 | RELN | NM_005045 | 65 | 65 | 31    | 77      | 49   | 1915   | 10,3   | 100         |
| chr7 | 103214593 | 103214808 | RELN | NM_005045 | 65 | 65 | 30    | 208     | 933  | 40239  | 186,29 | 74          |
| chr7 | 103215916 | 103216098 | RELN | NM_005045 | 65 | 65 | 29    | 158     | 900  | 39620  | 216,5  | 65,8        |
| chr7 | 103230021 | 103230313 | RELN | NM_005045 | 65 | 65 | 28    | 233     | 1155 | 53966  | 184,18 | 100         |
| chr7 | 103234089 | 103234295 | RELN | NM_005045 | 65 | 65 | 27    | 201     | 913  | 37740  | 182,32 | 83,1        |



|      |           |           |       |           |    |    |       |         |      |        |        |             |
|------|-----------|-----------|-------|-----------|----|----|-------|---------|------|--------|--------|-------------|
| chr7 | 103234702 | 103234881 | RELN  | NM_005045 | 65 | 65 | 26    | 172     | 436  | 18689  | 103,83 | 66,3        |
| chr7 | 103236965 | 103237174 | RELN  | NM_005045 | 65 | 65 | 25    | 206     | 445  | 18506  | 88,12  | 69,9        |
| chr7 | 103243668 | 103243880 | RELN  | NM_005045 | 65 | 65 | 24    | 187     | 1641 | 72165  | 338,8  | 69,5        |
| chr7 | 103244836 | 103245030 | RELN  | NM_005045 | 65 | 65 | 23    | 138     | 320  | 13528  | 69,37  | 68,8        |
| chr7 | 103251103 | 103251297 | RELN  | NM_005045 | 65 | 65 | 22    | 113     | 799  | 32761  | 168,01 | 100         |
| chr7 | 103252092 | 103252274 | RELN  | NM_005045 | 65 | 65 | 21    | 193     | 263  | 10875  | 59,43  | 82,4        |
| chr7 | 103270325 | 103270626 | RELN  | NM_005045 | 65 | 65 | 20    | 237     | 843  | 38374  | 127,07 | 100         |
| chr7 | 103275882 | 103276088 | RELN  | NM_005045 | 65 | 65 | 19    | 162     | 253  | 10621  | 51,31  | 93,8        |
| chr7 | 103276694 | 103276959 | RELN  | NM_005045 | 65 | 65 | 18    | 234     | 485  | 22245  | 83,63  | 94,9        |
| chr7 | 103280925 | 103281119 | RELN  | NM_005045 | 65 | 65 | 17    | 67      | 529  | 23156  | 118,75 | 100         |
| chr7 | 103290672 | 103290890 | RELN  | NM_005045 | 65 | 65 | 16    | 110     | 447  | 19101  | 87,22  | 100         |
| chr7 | 103292146 | 103292319 | RELN  | NM_005045 | 65 | 65 | 15    | 129     | 144  | 6407   | 36,82  | 70,5        |
| chr7 | 103292944 | 103293150 | RELN  | NM_005045 | 65 | 65 | 14    | 209     | 179  | 7908   | 38,2   | 73,2        |
| chr7 | 103294498 | 103294698 | RELN  | NM_005045 | 65 | 65 | 13    | 113     | 123  | 5140   | 25,57  | 100         |
| chr7 | 103301798 | 103302001 | RELN  | NM_005045 | 65 | 65 | 12    | 152     | 198  | 8602   | 42,17  | 100         |
| chr7 | 103322505 | 103322699 | RELN  | NM_005045 | 65 | 65 | 11    | 146     | 534  | 22156  | 113,62 | 93,8        |
| chr7 | 103338225 | 103338484 | RELN  | NM_005045 | 65 | 65 | 10    | 241     | 585  | 26828  | 103,18 | 76,8        |
| chr7 | 103341280 | 103341474 | RELN  | NM_005045 | 65 | 65 | 9     | 97      | 236  | 9700   | 49,74  | 100         |
| chr7 | 103363584 | 103363760 | RELN  | NM_005045 | 65 | 65 | 8     | 52      | 37   | 1675   | 9,46   | 100         |
| chr7 | 103368529 | 103368750 | RELN  | NM_005045 | 65 | 65 | 7     | 97      | 416  | 18122  | 81,63  | 100         |
| chr7 | 103389748 | 103389939 | RELN  | NM_005045 | 65 | 65 | 6     | 79      | 322  | 12710  | 66,2   | 84,8        |
| chr7 | 103393544 | 103393738 | RELN  | NM_005045 | 65 | 65 | 5     | 33      | 173  | 6997   | 35,88  | 100         |
| chr7 | 103416932 | 103417135 | RELN  | NM_005045 | 65 | 65 | 4     | 71      | 331  | 15033  | 73,69  | 100         |
| chr7 | 103474023 | 103474196 | RELN  | NM_005045 | 65 | 65 | 3     | 136     | 318  | 12988  | 74,64  | 71,3        |
| chr7 | 103557464 | 103557661 | RELN  | NM_005045 | 65 | 65 | 2     | 111     | 209  | 8230   | 41,57  | 100         |
| chr7 | 103629477 | 103629944 | RELN  | NM_005045 | 65 | 65 | 1     | 226     | 213  | 9517   | 20,34  | 100         |
| chr7 | 107531584 | 107531704 | DLD   | NM_000108 | 14 | 14 | 1     | 39      | 16   | 698    | 5,77   | 23,1        |
| chr7 | 107533598 | 107533783 | DLD   | NM_000108 | 14 | 14 | 2     | 79      | 470  | 19925  | 107,12 | 100         |
| chr7 | 107542161 | 107542352 | DLD   | NM_000108 | 14 | 14 | 3     | 80      | 190  | 8162   | 42,51  | 100         |
| chr7 | 107542766 | 107542957 | DLD   | NM_000108 | 14 | 14 | 4     | 69      | 444  | 19618  | 102,18 | 100         |
| chr7 | 107543929 | 107544108 | DLD   | NM_000108 | 14 | 14 | 5     | 70      | 689  | 28096  | 156,09 | 91,4        |
| chr7 | 107545321 | 107545509 | DLD   | NM_000108 | 14 | 14 | 6     | 101     | 146  | 5642   | 29,85  | 100         |
| chr7 | 107545792 | 107545977 | DLD   | NM_000108 | 14 | 14 | 7     | 144     | 583  | 23719  | 127,52 | 100         |
| chr7 | 107546731 | 107546907 | DLD   | NM_000108 | 14 | 14 | 8     | 102     | 279  | 10705  | 60,48  | 81,4        |
| chr7 | 107555945 | 107556130 | DLD   | NM_000108 | 14 | 14 | 9     | 191     | 226  | 9873   | 53,08  | 94,2        |
| chr7 | 107557217 | 107557420 | DLD   | NM_000108 | 14 | 14 | 10    | 171     | 310  | 13856  | 67,92  | 100         |
| chr7 | 107557673 | 107557888 | DLD   | NM_000108 | 14 | 14 | 11    | 190     | 540  | 22723  | 105,2  | 90          |
| chr7 | 107558334 | 107558552 | DLD   | NM_000108 | 14 | 14 | 12    | 138     | 411  | 17676  | 80,71  | 100         |
| chr7 | 107559413 | 107559791 | DLD   | NM_000108 | 14 | 14 | 13,14 | 90,66   | 771  | 36394  | 96,03  | 100,0,100,0 |
| chr7 | 127950748 | 127950966 | RBM28 | NM_018077 | 19 | 19 | 19    | 135     | 475  | 20785  | 94,91  | 86,7        |
| chr7 | 127953252 | 127953449 | RBM28 | NM_018077 | 19 | 19 | 18    | 100     | 917  | 38827  | 196,1  | 76          |
| chr7 | 127954855 | 127955153 | RBM28 | NM_018077 | 19 | 19 | 17    | 257     | 527  | 23248  | 77,75  | 85,2        |
| chr7 | 127957693 | 127957863 | RBM28 | NM_018077 | 19 | 19 | 16    | 75      | 193  | 8483   | 49,61  | 100         |
| chr7 | 127958059 | 127958232 | RBM28 | NM_018077 | 19 | 19 | 15    | 150     | 341  | 14489  | 83,27  | 67,3        |
| chr7 | 127961366 | 127961554 | RBM28 | NM_018077 | 19 | 19 | 14    | 159     | 138  | 5708   | 30,2   | 70,4        |
| chr7 | 127963451 | 127963636 | RBM28 | NM_018077 | 19 | 19 | 13    | 65      | 293  | 11742  | 63,13  | 87,7        |
| chr7 | 127964510 | 127964713 | RBM28 | NM_018077 | 19 | 19 | 12    | 136     | 847  | 35967  | 176,31 | 75          |
| chr7 | 127965780 | 127965962 | RBM28 | NM_018077 | 19 | 19 | 11    | 74      | 101  | 3394   | 18,55  | 100         |
| chr7 | 127970865 | 127971053 | RBM28 | NM_018077 | 19 | 19 | 10    | 110     | 316  | 13981  | 73,97  | 100         |
| chr7 | 127973303 | 127973524 | RBM28 | NM_018077 | 19 | 19 | 9     | 73      | 364  | 16177  | 72,87  | 100         |
| chr7 | 127975559 | 127976070 | RBM28 | NM_018077 | 19 | 19 | 8,7   | 137,196 | 3182 | 146361 | 285,86 | 100,0,86,7  |
| chr7 | 127977105 | 127977317 | RBM28 | NM_018077 | 19 | 19 | 6     | 72      | 1704 | 77280  | 362,82 | 100         |
| chr7 | 127978279 | 127978476 | RBM28 | NM_018077 | 19 | 19 | 5     | 93      | 124  | 5117   | 25,84  | 100         |
| chr7 | 127978723 | 127978902 | RBM28 | NM_018077 | 19 | 19 | 4     | 76      | 158  | 6604   | 36,69  | 100         |
| chr7 | 127979230 | 127979433 | RBM28 | NM_018077 | 19 | 19 | 3     | 95      | 227  | 9537   | 46,75  | 100         |
| chr7 | 127979620 | 127979817 | RBM28 | NM_018077 | 19 | 19 | 2     | 159     | 576  | 25201  | 127,28 | 82,4        |
| chr7 | 127983770 | 127983976 | RBM28 | NM_018077 | 19 | 19 | 1     | 118     | 228  | 8175   | 39,49  | 66,1        |

|      |           |           |         |           |    |    |    |     |      |       |        |      |
|------|-----------|-----------|---------|-----------|----|----|----|-----|------|-------|--------|------|
| chr7 | 130038616 | 130038819 | CEP41   | NM_018718 | 11 | 11 | 11 | 149 | 242  | 9914  | 48,6   | 59,1 |
| chr7 | 130039856 | 130040139 | CEP41   | NM_018718 | 11 | 11 | 10 | 216 | 63   | 3074  | 10,82  | 100  |
| chr7 | 130040561 | 130040749 | CEP41   | NM_018718 | 11 | 11 | 9  | 115 | 492  | 22212 | 117,52 | 88,7 |
| chr7 | 130041601 | 130041801 | CEP41   | NM_018718 | 11 | 11 | 8  | 68  | 991  | 45825 | 227,99 | 100  |
| chr7 | 130042458 | 130042673 | CEP41   | NM_018718 | 11 | 11 | 7  | 152 | 37   | 1566  | 7,25   | 100  |
| chr7 | 130044334 | 130044561 | CEP41   | NM_018718 | 11 | 11 | 6  | 145 | 376  | 16581 | 72,72  | 100  |
| chr7 | 130050954 | 130051172 | CEP41   | NM_018718 | 11 | 11 | 5  | 70  | 106  | 4232  | 19,32  | 100  |
| chr7 | 130051884 | 130052087 | CEP41   | NM_018718 | 11 | 11 | 4  | 62  | 147  | 6815  | 33,41  | 100  |
| chr7 | 130056638 | 130056826 | CEP41   | NM_018718 | 11 | 11 | 3  | 48  | 782  | 35124 | 185,84 | 100  |
| chr7 | 130067727 | 130067915 | CEP41   | NM_018718 | 11 | 11 | 2  | 64  | 148  | 6741  | 35,67  | 100  |
| chr7 | 130080760 | 130080930 | CEP41   | NM_018718 | 11 | 11 | 1  | 33  | 1373 | 53972 | 315,63 | 100  |
| chr7 | 140434270 | 140434568 | BRAF    | NM_004333 | 18 | 18 | 18 | 174 | 857  | 41418 | 138,52 | 98,9 |
| chr7 | 140439653 | 140439832 | BRAF    | NM_004333 | 18 | 18 | 17 | 135 | 236  | 10751 | 59,73  | 69,6 |
| chr7 | 140449127 | 140449312 | BRAF    | NM_004333 | 18 | 18 | 16 | 132 | 61   | 2727  | 14,66  | 69,7 |
| chr7 | 140453108 | 140453284 | BRAF    | NM_004333 | 18 | 18 | 15 | 119 | 131  | 5168  | 29,2   | 72,3 |
| chr7 | 140453984 | 140454175 | BRAF    | NM_004333 | 18 | 18 | 14 | 47  | 338  | 14340 | 74,69  | 100  |
| chr7 | 140476759 | 140476971 | BRAF    | NM_004333 | 18 | 18 | 13 | 177 | 212  | 9107  | 42,76  | 73,4 |
| chr7 | 140477702 | 140477911 | BRAF    | NM_004333 | 18 | 18 | 12 | 85  | 131  | 5733  | 27,3   | 100  |
| chr7 | 140481409 | 140481585 | BRAF    | NM_004333 | 18 | 18 | 11 | 118 | 366  | 15331 | 86,62  | 72   |
| chr7 | 140482863 | 140483045 | BRAF    | NM_004333 | 18 | 18 | 10 | 137 | 98   | 4368  | 23,87  | 69,3 |
| chr7 | 140487265 | 140487465 | BRAF    | NM_004333 | 18 | 18 | 9  | 37  | 923  | 40066 | 199,33 | 100  |
| chr7 | 140494132 | 140494332 | BRAF    | NM_004333 | 18 | 18 | 8  | 160 | 204  | 8765  | 43,61  | 85   |
| chr7 | 140500196 | 140500366 | BRAF    | NM_004333 | 18 | 18 | 7  | 120 | 77   | 3196  | 18,69  | 71,7 |
| chr7 | 140501260 | 140501442 | BRAF    | NM_004333 | 18 | 18 | 6  | 149 | 44   | 1641  | 8,97   | 67,8 |
| chr7 | 140507785 | 140507982 | BRAF    | NM_004333 | 18 | 18 | 5  | 103 | 414  | 17822 | 90,01  | 75,7 |
| chr7 | 140508718 | 140508897 | BRAF    | NM_004333 | 18 | 18 | 4  | 104 | 372  | 16496 | 91,64  | 75   |
| chr7 | 140534445 | 140534755 | BRAF    | NM_004333 | 18 | 18 | 3  | 264 | 535  | 23974 | 77,09  | 86,4 |
| chr7 | 140549915 | 140550124 | BRAF    | NM_004333 | 18 | 18 | 2  | 102 | 154  | 5469  | 26,04  | 96,1 |
| chr7 | 140624291 | 140624509 | BRAF    | NM_004333 | 18 | 18 | 1  | 138 | 1    | 48    | 0,22   | 100  |
| chr7 | 145813827 | 145814122 | CNTNAP2 | NM_014141 | 24 | 24 | 1  | 97  | 209  | 8029  | 27,13  | 100  |
| chr7 | 146471308 | 146471517 | CNTNAP2 | NM_014141 | 24 | 24 | 2  | 111 | 122  | 5580  | 26,57  | 100  |
| chr7 | 146536874 | 146537065 | CNTNAP2 | NM_014141 | 24 | 24 | 3  | 194 | 643  | 28373 | 147,78 | 63,4 |
| chr7 | 146740960 | 146741187 | CNTNAP2 | NM_014141 | 24 | 24 | 4  | 148 | 597  | 27420 | 120,26 | 100  |
| chr7 | 146805291 | 146805500 | CNTNAP2 | NM_014141 | 24 | 24 | 5  | 204 | 302  | 12725 | 60,6   | 74,5 |
| chr7 | 146818119 | 146818322 | CNTNAP2 | NM_014141 | 24 | 24 | 6  | 185 | 143  | 6402  | 31,38  | 74,1 |
| chr7 | 146825741 | 146825953 | CNTNAP2 | NM_014141 | 24 | 24 | 7  | 144 | 218  | 8870  | 41,64  | 100  |
| chr7 | 146829268 | 146829560 | CNTNAP2 | NM_014141 | 24 | 24 | 8  | 265 | 695  | 30327 | 103,51 | 84,5 |
| chr7 | 146997195 | 146997407 | CNTNAP2 | NM_014141 | 24 | 24 | 9  | 150 | 359  | 15697 | 73,69  | 100  |
| chr7 | 147092686 | 147092889 | CNTNAP2 | NM_014141 | 24 | 24 | 10 | 172 | 376  | 16033 | 78,59  | 100  |
| chr7 | 147182922 | 147183104 | CNTNAP2 | NM_014141 | 24 | 24 | 11 | 107 | 267  | 11288 | 61,68  | 72,9 |
| chr7 | 147259180 | 147259389 | CNTNAP2 | NM_014141 | 24 | 24 | 12 | 120 | 384  | 17374 | 82,73  | 100  |
| chr7 | 147336266 | 147336469 | CNTNAP2 | NM_014141 | 24 | 24 | 13 | 201 | 501  | 20770 | 101,81 | 66,2 |
| chr7 | 147600562 | 147600765 | CNTNAP2 | NM_014141 | 24 | 24 | 14 | 157 | 408  | 17181 | 84,22  | 69,4 |
| chr7 | 147674857 | 147675048 | CNTNAP2 | NM_014141 | 24 | 24 | 15 | 128 | 133  | 5968  | 31,08  | 74,2 |
| chr7 | 147815239 | 147815412 | CNTNAP2 | NM_014141 | 24 | 24 | 16 | 171 | 246  | 10264 | 58,99  | 83   |
| chr7 | 147844518 | 147844810 | CNTNAP2 | NM_014141 | 24 | 24 | 17 | 219 | 511  | 22945 | 78,31  | 100  |
| chr7 | 147869377 | 147869639 | CNTNAP2 | NM_014141 | 24 | 24 | 18 | 237 | 508  | 22345 | 84,96  | 81,9 |
| chr7 | 147914306 | 147914580 | CNTNAP2 | NM_014141 | 24 | 24 | 19 | 237 | 1301 | 53685 | 195,22 | 84,8 |
| chr7 | 147926689 | 147926904 | CNTNAP2 | NM_014141 | 24 | 24 | 20 | 134 | 299  | 13377 | 61,93  | 100  |
| chr7 | 147964128 | 147964346 | CNTNAP2 | NM_014141 | 24 | 24 | 21 | 94  | 425  | 19187 | 87,61  | 96,8 |
| chr7 | 148080675 | 148080925 | CNTNAP2 | NM_014141 | 24 | 24 | 22 | 240 | 327  | 14212 | 56,62  | 77,1 |
| chr7 | 148106428 | 148106637 | CNTNAP2 | NM_014141 | 24 | 24 | 23 | 81  | 136  | 5772  | 27,49  | 100  |
| chr7 | 148112421 | 148112790 | CNTNAP2 | NM_014141 | 24 | 24 | 24 | 200 | 1418 | 67146 | 181,48 | 100  |
| chr7 | 155595485 | 155596435 | SHH     | NM_000193 | 3  | 3  | 3  | 827 | 81   | 3645  | 3,83   | 100  |
| chr7 | 155598990 | 155599513 | SHH     | NM_000193 | 3  | 3  | 2  | 262 | 627  | 29097 | 55,53  | 100  |
| chr7 | 155604460 | 155604906 | SHH     | NM_000193 | 3  | 3  | 1  | 300 | 898  | 42241 | 94,5   | 100  |
| chr8 | 6264137   | 6264319   | MCPH1   | NM_024596 | 14 | 14 | 1  | 22  | 43   | 1750  | 9,56   | 100  |

|      |          |          |        |              |    |    |       |         |      |        |        |             |
|------|----------|----------|--------|--------------|----|----|-------|---------|------|--------|--------|-------------|
| chr8 | 6266685  | 6266900  | MCPH1  | NM_024596    | 14 | 14 | 2     | 92      | 91   | 4025   | 18,63  | 100         |
| chr8 | 6272262  | 6272468  | MCPH1  | NM_024596    | 14 | 14 | 3     | 119     | 151  | 5855   | 28,29  | 100         |
| chr8 | 6288948  | 6289136  | MCPH1  | NM_024596    | 14 | 14 | 4     | 88      | 274  | 11235  | 59,44  | 100         |
| chr8 | 6293468  | 6293668  | MCPH1  | NM_024596    | 14 | 14 | 5     | 115     | 216  | 8675   | 43,16  | 87          |
| chr8 | 6296472  | 6296663  | MCPH1  | NM_024596    | 14 | 14 | 6     | 144     | 82   | 3715   | 19,35  | 100         |
| chr8 | 6299487  | 6299681  | MCPH1  | NM_024596    | 14 | 14 | 7     | 90      | 650  | 28135  | 144,28 | 100         |
| chr8 | 6301890  | 6303133  | MCPH1  | NM_024596    | 14 | 14 | 8     | 1155    | 2851 | 134083 | 107,78 | 100         |
| chr8 | 6312597  | 6312785  | MCPH1  | NM_024596    | 14 | 14 | 9     | 110     | 220  | 9153   | 48,43  | 100         |
| chr8 | 6335075  | 6335254  | MCPH1  | NM_024596    | 14 | 14 | 10    | 38      | 96   | 4297   | 23,87  | 100         |
| chr8 | 6338170  | 6338352  | MCPH1  | NM_024596    | 14 | 14 | 11    | 163     | 689  | 28768  | 157,2  | 72,4        |
| chr8 | 6357202  | 6357535  | MCPH1  | NM_024596    | 14 | 14 | 12    | 78      | 533  | 23271  | 69,67  | 100         |
| chr8 | 6478983  | 6479266  | MCPH1  | NM_024596    | 14 | 14 | 13    | 238     | 445  | 20056  | 70,62  | 96,6        |
| chr8 | 6500422  | 6500717  | MCPH1  | NM_024596    | 14 | 14 | 14    | 56      | 884  | 41190  | 139,16 | 100         |
| chr8 | 15397856 | 15398130 | TUSC3  | NM_006765    | 11 | 10 | 1     | 138     | 53   | 2286   | 8,31   | 100         |
| chr8 | 15480585 | 15480773 | TUSC3  | NM_006765    | 11 | 10 | 2     | 170     | 355  | 14608  | 77,29  | 100         |
| chr8 | 15508095 | 15508301 | TUSC3  | NM_006765    | 11 | 10 | 3     | 118     | 1062 | 45395  | 219,3  | 81,4        |
| chr8 | 15516994 | 15517182 | TUSC3  | NM_006765    | 11 | 10 | 4     | 141     | 305  | 13035  | 68,97  | 100         |
| chr8 | 15519631 | 15519831 | TUSC3  | NM_006765    | 11 | 10 | 5     | 141     | 480  | 22372  | 111,3  | 100         |
| chr8 | 15531188 | 15531394 | TUSC3  | NM_006765    | 11 | 10 | 6     | 90      | 583  | 25873  | 124,99 | 100         |
| chr8 | 15588115 | 15588303 | TUSC3  | NM_006765    | 11 | 10 | 7     | 64      | 279  | 11813  | 62,5   | 100         |
| chr8 | 15600971 | 15601171 | TUSC3  | NM_006765    | 11 | 10 | 8     | 75      | 294  | 13105  | 65,2   | 100         |
| chr8 | 15605848 | 15606276 | TUSC3  | NM_006765    | 11 | 10 | 9     | 91      | 418  | 19555  | 45,58  | 100         |
| chr8 | 15615272 | 15615451 | TUSC3  | NM_006765    | 11 | 10 | 10    | 19      | 363  | 14518  | 80,66  | 100         |
| chr8 | 15621773 | 15621893 | TUSC3  | NM_006765    | 11 | 10 | 11    | 2447    | 115  | 3918   | 32,38  | 4,9         |
| chr8 | 27633013 | 27633210 | ESCO2  | NM_001017420 | 11 | 10 | 2     | 53      | 541  | 21623  | 109,21 | 100         |
| chr8 | 27633885 | 27634710 | ESCO2  | NM_001017420 | 11 | 10 | 3     | 808     | 1311 | 61754  | 74,76  | 99,3        |
| chr8 | 27637694 | 27637900 | ESCO2  | NM_001017420 | 11 | 10 | 4     | 94      | 316  | 13115  | 63,36  | 96,8        |
| chr8 | 27641505 | 27641693 | ESCO2  | NM_001017420 | 11 | 10 | 5     | 58      | 622  | 26279  | 139,04 | 100         |
| chr8 | 27645393 | 27645596 | ESCO2  | NM_001017420 | 11 | 10 | 6     | 118     | 730  | 28087  | 137,68 | 100         |
| chr8 | 27646320 | 27646529 | ESCO2  | NM_001017420 | 11 | 10 | 7     | 132     | 170  | 7592   | 36,15  | 100         |
| chr8 | 27649484 | 27649684 | ESCO2  | NM_001017420 | 11 | 10 | 8     | 90      | 961  | 37909  | 188,6  | 95,6        |
| chr8 | 27650183 | 27650398 | ESCO2  | NM_001017420 | 11 | 10 | 9     | 144     | 163  | 6225   | 28,82  | 100         |
| chr8 | 27656982 | 27657200 | ESCO2  | NM_001017420 | 11 | 10 | 10    | 176     | 212  | 8552   | 39,05  | 81,2        |
| chr8 | 27660758 | 27661094 | ESCO2  | NM_001017420 | 11 | 10 | 11    | 133     | 589  | 28122  | 83,45  | 100         |
| chr8 | 37595279 | 37595648 | ERLIN2 | NM_007175    | 12 | 11 | 2     | 107     | 1235 | 55699  | 150,54 | 100         |
| chr8 | 37597898 | 37598083 | ERLIN2 | NM_007175    | 12 | 11 | 3     | 82      | 574  | 25491  | 137,05 | 81,7        |
| chr8 | 37599170 | 37599385 | ERLIN2 | NM_007175    | 12 | 11 | 4     | 47      | 1210 | 53341  | 246,95 | 100         |
| chr8 | 37601825 | 37602490 | ERLIN2 | NM_007175    | 12 | 11 | 5,6   | 62.126  | 3140 | 149807 | 224,94 | 100,0,100,0 |
| chr8 | 37607008 | 37607303 | ERLIN2 | NM_007175    | 12 | 11 | 7     | 74      | 1701 | 78909  | 266,58 | 100         |
| chr8 | 37607819 | 37608016 | ERLIN2 | NM_007175    | 12 | 11 | 9     | 92      | 268  | 11280  | 56,97  | 100         |
| chr8 | 37609061 | 37609249 | ERLIN2 | NM_007175    | 12 | 11 | 10    | 90      | 11   | 522    | 2,76   | 100         |
| chr8 | 37610913 | 37611113 | ERLIN2 | NM_007175    | 12 | 11 | 11    | 80      | 412  | 18468  | 91,88  | 100         |
| chr8 | 37611476 | 37611732 | ERLIN2 | NM_007175    | 12 | 11 | 12    | 201     | 122  | 5023   | 19,54  | 78,6        |
| chr8 | 38090551 | 38090816 | DDHD2  | NM_015214    | 18 | 16 | 2     | 220     | 419  | 18707  | 70,33  | 82,7        |
| chr8 | 38091951 | 38092133 | DDHD2  | NM_015214    | 18 | 16 | 3     | 191     | 304  | 13271  | 72,52  | 79,6        |
| chr8 | 38095054 | 38095251 | DDHD2  | NM_015214    | 18 | 16 | 4     | 90      | 393  | 15483  | 78,2   | 100         |
| chr8 | 38095551 | 38095769 | DDHD2  | NM_015214    | 18 | 16 | 5     | 121     | 342  | 15691  | 71,65  | 100         |
| chr8 | 38097779 | 38097979 | DDHD2  | NM_015214    | 18 | 16 | 6     | 90      | 211  | 9307   | 46,3   | 100         |
| chr8 | 38099756 | 38099962 | DDHD2  | NM_015214    | 18 | 16 | 7     | 136     | 723  | 30786  | 148,72 | 100         |
| chr8 | 38103305 | 38103496 | DDHD2  | NM_015214    | 18 | 16 | 8     | 209     | 242  | 10166  | 52,95  | 78,5        |
| chr8 | 38103609 | 38103812 | DDHD2  | NM_015214    | 18 | 16 | 9     | 68      | 141  | 5695   | 27,92  | 91,2        |
| chr8 | 38105137 | 38105396 | DDHD2  | NM_015214    | 18 | 16 | 10    | 123     | 81   | 3599   | 13,84  | 100         |
| chr8 | 38107140 | 38107340 | DDHD2  | NM_015214    | 18 | 16 | 11    | 96      | 81   | 3623   | 18,02  | 100         |
| chr8 | 38109406 | 38109822 | DDHD2  | NM_015214    | 18 | 16 | 12,13 | 117.156 | 903  | 41690  | 99,98  | 100,0,100,0 |
| chr8 | 38110285 | 38110737 | DDHD2  | NM_015214    | 18 | 16 | 14,15 | 103.171 | 471  | 21831  | 48,19  | 56,3,100,0  |
| chr8 | 38111012 | 38111224 | DDHD2  | NM_015214    | 18 | 16 | 16    | 163     | 534  | 24177  | 113,51 | 92,6        |
| chr8 | 38117509 | 38117697 | DDHD2  | NM_015214    | 18 | 16 | 17    | 82      | 212  | 8674   | 45,89  | 100         |

|      |          |          |        |           |    |    |       |         |      |        |        |            |
|------|----------|----------|--------|-----------|----|----|-------|---------|------|--------|--------|------------|
| chr8 | 61653881 | 61655607 | CHD7   | NM_017780 | 38 | 37 | 2     | 1665    | 7881 | 383184 | 221,88 | 97,1       |
| chr8 | 61693598 | 61694038 | CHD7   | NM_017780 | 38 | 37 | 3     | 431     | 95   | 4348   | 9,86   | 91         |
| chr8 | 61707523 | 61707702 | CHD7   | NM_017780 | 38 | 37 | 4     | 142     | 181  | 7437   | 41,32  | 100        |
| chr8 | 61712899 | 61713123 | CHD7   | NM_017780 | 38 | 37 | 5     | 138     | 184  | 7885   | 35,04  | 100        |
| chr8 | 61713958 | 61714173 | CHD7   | NM_017780 | 38 | 37 | 6     | 66      | 223  | 9125   | 42,25  | 100        |
| chr8 | 61720771 | 61720962 | CHD7   | NM_017780 | 38 | 37 | 7     | 56      | 163  | 7231   | 37,66  | 100        |
| chr8 | 61728959 | 61729147 | CHD7   | NM_017780 | 38 | 37 | 8     | 115     | 96   | 3932   | 20,8   | 88,7       |
| chr8 | 61732527 | 61732730 | CHD7   | NM_017780 | 38 | 37 | 9     | 84      | 360  | 15783  | 77,37  | 100        |
| chr8 | 61734309 | 61734660 | CHD7   | NM_017780 | 38 | 37 | 10,11 | 138.122 | 720  | 33665  | 95,64  | 100,0,63.9 |
| chr8 | 61735039 | 61735337 | CHD7   | NM_017780 | 38 | 37 | 12    | 244     | 499  | 23258  | 77,79  | 100        |
| chr8 | 61736453 | 61736677 | CHD7   | NM_017780 | 38 | 37 | 13    | 177     | 455  | 19535  | 86,82  | 69,5       |
| chr8 | 61741159 | 61741374 | CHD7   | NM_017780 | 38 | 37 | 14    | 144     | 399  | 17140  | 79,35  | 100        |
| chr8 | 61742867 | 61743141 | CHD7   | NM_017780 | 38 | 37 | 15    | 256     | 528  | 23125  | 84,09  | 100        |
| chr8 | 61748588 | 61748761 | CHD7   | NM_017780 | 38 | 37 | 16    | 211     | 213  | 8655   | 49,74  | 61,6       |
| chr8 | 61749297 | 61749506 | CHD7   | NM_017780 | 38 | 37 | 17    | 196     | 475  | 21400  | 101,9  | 66,8       |
| chr8 | 61750266 | 61750457 | CHD7   | NM_017780 | 38 | 37 | 18    | 168     | 151  | 6307   | 32,85  | 76,8       |
| chr8 | 61750614 | 61750829 | CHD7   | NM_017780 | 38 | 37 | 19    | 180     | 210  | 9171   | 42,46  | 100        |
| chr8 | 61754132 | 61754581 | CHD7   | NM_017780 | 38 | 37 | 20,21 | 111.206 | 783  | 36356  | 80,79  | 100,0,85.4 |
| chr8 | 61757406 | 61757579 | CHD7   | NM_017780 | 38 | 37 | 22    | 200     | 685  | 28997  | 166,65 | 78,5       |
| chr8 | 61757859 | 61758056 | CHD7   | NM_017780 | 38 | 37 | 23    | 160     | 251  | 11163  | 56,38  | 68,8       |
| chr8 | 61761092 | 61761292 | CHD7   | NM_017780 | 38 | 37 | 24    | 90      | 801  | 34578  | 172,03 | 80         |
| chr8 | 61761572 | 61761766 | CHD7   | NM_017780 | 38 | 37 | 25    | 104     | 476  | 19946  | 102,29 | 100        |
| chr8 | 61763090 | 61763275 | CHD7   | NM_017780 | 38 | 37 | 26    | 130     | 484  | 19352  | 104,04 | 70,8       |
| chr8 | 61763614 | 61763906 | CHD7   | NM_017780 | 38 | 37 | 27,28 | 73,58   | 365  | 15522  | 52,98  | 68,5,100.0 |
| chr8 | 61764506 | 61764798 | CHD7   | NM_017780 | 38 | 37 | 29    | 229     | 346  | 14259  | 48,67  | 96,5       |
| chr8 | 61765024 | 61766042 | CHD7   | NM_017780 | 38 | 37 | 30,31 | 209.672 | 1937 | 93483  | 91,74  | 100,0,97.5 |
| chr8 | 61766859 | 61767062 | CHD7   | NM_017780 | 38 | 37 | 32    | 161     | 300  | 12158  | 59,6   | 87,6       |
| chr8 | 61768500 | 61768795 | CHD7   | NM_017780 | 38 | 37 | 33    | 228     | 884  | 41869  | 141,45 | 100        |
| chr8 | 61768947 | 61769369 | CHD7   | NM_017780 | 38 | 37 | 34    | 444     | 553  | 25480  | 60,24  | 82,4       |
| chr8 | 61773420 | 61773724 | CHD7   | NM_017780 | 38 | 37 | 35    | 222     | 410  | 18848  | 61,8   | 100        |
| chr8 | 61774754 | 61774945 | CHD7   | NM_017780 | 38 | 37 | 36    | 141     | 288  | 13128  | 68,38  | 100        |
| chr8 | 61775043 | 61775258 | CHD7   | NM_017780 | 38 | 37 | 37    | 105     | 140  | 6084   | 28,17  | 100        |
| chr8 | 61777618 | 61778609 | CHD7   | NM_017780 | 38 | 37 | 38    | 918     | 3627 | 173168 | 174,56 | 95,3       |
| chr8 | 86376124 | 86376398 | CA2    | NM_000067 | 7  | 7  | 1     | 34      | 11   | 495    | 1,8    | 100        |
| chr8 | 86377559 | 86377759 | CA2    | NM_000067 | 7  | 7  | 2     | 198     | 763  | 32834  | 163,35 | 70,7       |
| chr8 | 86385895 | 86386071 | CA2    | NM_000067 | 7  | 7  | 3     | 119     | 429  | 18744  | 105,9  | 100        |
| chr8 | 86386474 | 86386683 | CA2    | NM_000067 | 7  | 7  | 4     | 93      | 669  | 29213  | 139,11 | 100        |
| chr8 | 86387960 | 86388151 | CA2    | NM_000067 | 7  | 7  | 5     | 63      | 505  | 22685  | 118,15 | 100        |
| chr8 | 86389260 | 86389460 | CA2    | NM_000067 | 7  | 7  | 6     | 156     | 1787 | 76575  | 380,97 | 71,8       |
| chr8 | 86392862 | 86393160 | CA2    | NM_000067 | 7  | 7  | 7     | 120     | 916  | 43415  | 145,2  | 100        |
| chr8 | 90949223 | 90949441 | NBN    | NM_002485 | 16 | 16 | 15    | 50      | 187  | 7959   | 36,34  | 100        |
| chr8 | 90955398 | 90955607 | NBN    | NM_002485 | 16 | 16 | 14    | 114     | 698  | 31631  | 150,62 | 100        |
| chr8 | 90958414 | 90958593 | NBN    | NM_002485 | 16 | 16 | 13    | 156     | 531  | 21878  | 121,54 | 70,5       |
| chr8 | 90959910 | 90960122 | NBN    | NM_002485 | 16 | 16 | 12    | 69      | 303  | 13419  | 63     | 100        |
| chr8 | 90965448 | 90965882 | NBN    | NM_002485 | 16 | 16 | 11    | 448     | 958  | 44147  | 101,49 | 91,7       |
| chr8 | 90967509 | 90967795 | NBN    | NM_002485 | 16 | 16 | 10    | 273     | 915  | 41894  | 145,97 | 100        |
| chr8 | 90970917 | 90971129 | NBN    | NM_002485 | 16 | 16 | 9     | 130     | 302  | 12438  | 58,39  | 100        |
| chr8 | 90976547 | 90976756 | NBN    | NM_002485 | 16 | 16 | 8     | 98      | 518  | 22941  | 109,24 | 100        |
| chr8 | 90982585 | 90982791 | NBN    | NM_002485 | 16 | 16 | 7     | 194     | 325  | 13369  | 64,58  | 100        |
| chr8 | 90983344 | 90983520 | NBN    | NM_002485 | 16 | 16 | 6     | 118     | 270  | 11171  | 63,11  | 100        |
| chr8 | 90990372 | 90990566 | NBN    | NM_002485 | 16 | 16 | 5     | 104     | 196  | 8654   | 44,38  | 100        |
| chr8 | 90992983 | 90993177 | NBN    | NM_002485 | 16 | 16 | 4     | 160     | 405  | 17893  | 91,76  | 86,9       |
| chr8 | 90993634 | 90993846 | NBN    | NM_002485 | 16 | 16 | 3     | 149     | 190  | 8612   | 40,43  | 79,2       |
| chr8 | 90994907 | 90995101 | NBN    | NM_002485 | 16 | 16 | 2     | 134     | 378  | 16742  | 85,86  | 100        |
| chr8 | 94767154 | 94767413 | TMEM67 | NM_153704 | 28 | 28 | 1     | 223     | 1302 | 61828  | 237,8  | 95,1       |
| chr8 | 94767942 | 94768127 | TMEM67 | NM_153704 | 28 | 28 | 2     | 89      | 84   | 3389   | 18,22  | 100        |
| chr8 | 94770676 | 94770846 | TMEM67 | NM_153704 | 28 | 28 | 3     | 94      | 328  | 13947  | 81,56  | 100        |

|      |           |           |        |           |    |    |       |         |      |       |        |             |
|------|-----------|-----------|--------|-----------|----|----|-------|---------|------|-------|--------|-------------|
| chr8 | 94776076  | 94776282  | TMEM67 | NM_153704 | 28 | 28 | 4     | 100     | 287  | 12355 | 59,69  | 94          |
| chr8 | 94777631  | 94777914  | TMEM67 | NM_153704 | 28 | 28 | 5,6   | 70,75   | 543  | 24902 | 87,68  | 100,0,100,0 |
| chr8 | 94784702  | 94784884  | TMEM67 | NM_153704 | 28 | 28 | 7     | 63      | 243  | 10094 | 55,16  | 100         |
| chr8 | 94792795  | 94793223  | TMEM67 | NM_153704 | 28 | 28 | 8,9   | 155,109 | 890  | 37483 | 87,37  | 100,0,100,0 |
| chr8 | 94793858  | 94794043  | TMEM67 | NM_153704 | 28 | 28 | 10    | 87      | 178  | 7161  | 38,5   | 100         |
| chr8 | 94794528  | 94794710  | TMEM67 | NM_153704 | 28 | 28 | 11    | 66      | 64   | 2502  | 13,67  | 100         |
| chr8 | 94797502  | 94797672  | TMEM67 | NM_153704 | 28 | 28 | 12    | 157     | 120  | 4887  | 28,58  | 66,9        |
| chr8 | 94798418  | 94798597  | TMEM67 | NM_153704 | 28 | 28 | 13    | 124     | 181  | 7588  | 42,16  | 100         |
| chr8 | 94800054  | 94800242  | TMEM67 | NM_153704 | 28 | 28 | 14    | 106     | 837  | 38128 | 201,74 | 100         |
| chr8 | 94803463  | 94803693  | TMEM67 | NM_153704 | 28 | 28 | 15    | 57      | 167  | 7168  | 31,03  | 100         |
| chr8 | 94805377  | 94805562  | TMEM67 | NM_153704 | 28 | 28 | 16    | 99      | 437  | 19232 | 103,4  | 100         |
| chr8 | 94807591  | 94807776  | TMEM67 | NM_153704 | 28 | 28 | 17    | 99      | 266  | 11446 | 61,54  | 100         |
| chr8 | 94808083  | 94808271  | TMEM67 | NM_153704 | 28 | 28 | 18    | 87      | 349  | 15846 | 83,84  | 100         |
| chr8 | 94809319  | 94809670  | TMEM67 | NM_153704 | 28 | 28 | 19,20 | 100,140 | 507  | 24022 | 68,24  | 100,0,80,0  |
| chr8 | 94811830  | 94812006  | TMEM67 | NM_153704 | 28 | 28 | 21    | 141     | 589  | 23487 | 132,69 | 100         |
| chr8 | 94815828  | 94816034  | TMEM67 | NM_153704 | 28 | 28 | 22    | 81      | 184  | 7229  | 34,92  | 100         |
| chr8 | 94816992  | 94817168  | TMEM67 | NM_153704 | 28 | 28 | 23    | 117     | 135  | 5999  | 33,89  | 98,3        |
| chr8 | 94821033  | 94821387  | TMEM67 | NM_153704 | 28 | 28 | 24,25 | 117,105 | 682  | 32398 | 91,26  | 100,0,98,1  |
| chr8 | 94821971  | 94822168  | TMEM67 | NM_153704 | 28 | 28 | 26    | 103     | 47   | 1989  | 10,05  | 100         |
| chr8 | 94827536  | 94827721  | TMEM67 | NM_153704 | 28 | 28 | 27    | 143     | 163  | 6566  | 35,3   | 97,9        |
| chr8 | 94828611  | 94828814  | TMEM67 | NM_153704 | 28 | 28 | 28    | 81      | 42   | 1712  | 8,39   | 86,4        |
| chr8 | 100025955 | 100026146 | VPS13B | NM_017890 | 62 | 61 | 2     | 147     | 532  | 23066 | 120,14 | 88,4        |
| chr8 | 100050634 | 100050819 | VPS13B | NM_017890 | 62 | 61 | 3     | 144     | 148  | 5939  | 31,93  | 100         |
| chr8 | 100108514 | 100108684 | VPS13B | NM_017890 | 62 | 61 | 4     | 121     | 206  | 8974  | 52,48  | 100         |
| chr8 | 100115233 | 100115439 | VPS13B | NM_017890 | 62 | 61 | 5     | 168     | 730  | 31265 | 151,04 | 69          |
| chr8 | 100123325 | 100123501 | VPS13B | NM_017890 | 62 | 61 | 6     | 182     | 151  | 6073  | 34,31  | 96,7        |
| chr8 | 100127887 | 100128072 | VPS13B | NM_017890 | 62 | 61 | 7     | 175     | 277  | 10767 | 57,89  | 82,9        |
| chr8 | 100133423 | 100133774 | VPS13B | NM_017890 | 62 | 61 | 8     | 269     | 500  | 22992 | 65,32  | 93,3        |
| chr8 | 100146783 | 100146977 | VPS13B | NM_017890 | 62 | 61 | 9     | 96      | 168  | 7004  | 35,92  | 100         |
| chr8 | 100147212 | 100147394 | VPS13B | NM_017890 | 62 | 61 | 10    | 123     | 353  | 15484 | 84,61  | 100         |
| chr8 | 100147813 | 100148019 | VPS13B | NM_017890 | 62 | 61 | 11    | 138     | 476  | 20701 | 100    | 100         |
| chr8 | 100148905 | 100149105 | VPS13B | NM_017890 | 62 | 61 | 12    | 88      | 916  | 39466 | 196,35 | 86,4        |
| chr8 | 100155197 | 100155394 | VPS13B | NM_017890 | 62 | 61 | 13    | 192     | 176  | 7610  | 38,43  | 100         |
| chr8 | 100160068 | 100160241 | VPS13B | NM_017890 | 62 | 61 | 14    | 170     | 468  | 19346 | 111,18 | 100         |
| chr8 | 100168785 | 100168973 | VPS13B | NM_017890 | 62 | 61 | 15    | 195     | 609  | 25858 | 136,81 | 95,9        |
| chr8 | 100182225 | 100182425 | VPS13B | NM_017890 | 62 | 61 | 16    | 125     | 463  | 19774 | 98,38  | 100         |
| chr8 | 100205076 | 100205261 | VPS13B | NM_017890 | 62 | 61 | 17    | 182     | 321  | 13611 | 73,18  | 86,8        |
| chr8 | 100286392 | 100286592 | VPS13B | NM_017890 | 62 | 61 | 18    | 135     | 256  | 11174 | 55,59  | 100         |
| chr8 | 100287289 | 100287504 | VPS13B | NM_017890 | 62 | 61 | 19    | 174     | 131  | 5988  | 27,72  | 100         |
| chr8 | 100396351 | 100396554 | VPS13B | NM_017890 | 62 | 61 | 20    | 110     | 165  | 7240  | 35,49  | 100         |
| chr8 | 100403818 | 100404015 | VPS13B | NM_017890 | 62 | 61 | 21    | 148     | 308  | 12629 | 63,78  | 77,7        |
| chr8 | 100443710 | 100443886 | VPS13B | NM_017890 | 62 | 61 | 22    | 128     | 909  | 40196 | 227,1  | 95,3        |
| chr8 | 100454611 | 100454879 | VPS13B | NM_017890 | 62 | 61 | 23    | 235     | 752  | 32774 | 121,84 | 100         |
| chr8 | 100479611 | 100479885 | VPS13B | NM_017890 | 62 | 61 | 24    | 221     | 1831 | 85710 | 311,67 | 100         |
| chr8 | 100493846 | 100494073 | VPS13B | NM_017890 | 62 | 61 | 25    | 204     | 362  | 15904 | 69,75  | 90,7        |
| chr8 | 100513882 | 100514079 | VPS13B | NM_017890 | 62 | 61 | 26    | 172     | 226  | 10164 | 51,33  | 95,9        |
| chr8 | 100515002 | 100515178 | VPS13B | NM_017890 | 62 | 61 | 27    | 115     | 556  | 24151 | 136,45 | 100         |
| chr8 | 100520040 | 100520219 | VPS13B | NM_017890 | 62 | 61 | 28    | 142     | 791  | 33043 | 183,57 | 70,4        |
| chr8 | 100523300 | 100523734 | VPS13B | NM_017890 | 62 | 61 | 29    | 409     | 940  | 45311 | 104,16 | 98,5        |
| chr8 | 100533067 | 100533276 | VPS13B | NM_017890 | 62 | 61 | 30    | 112     | 217  | 9211  | 43,86  | 100         |
| chr8 | 100568652 | 100568852 | VPS13B | NM_017890 | 62 | 61 | 31    | 204     | 73   | 3027  | 15,06  | 85,8        |
| chr8 | 100587848 | 100588036 | VPS13B | NM_017890 | 62 | 61 | 32    | 127     | 403  | 17645 | 93,36  | 100         |
| chr8 | 100589692 | 100589898 | VPS13B | NM_017890 | 62 | 61 | 33    | 144     | 669  | 29083 | 140,5  | 100         |
| chr8 | 100654039 | 100654722 | VPS13B | NM_017890 | 62 | 61 | 34    | 688     | 1925 | 92126 | 134,69 | 99,4        |
| chr8 | 100673550 | 100673735 | VPS13B | NM_017890 | 62 | 61 | 35    | 138     | 210  | 8608  | 46,28  | 100         |
| chr8 | 100711802 | 100712242 | VPS13B | NM_017890 | 62 | 61 | 36    | 408     | 827  | 38784 | 87,95  | 88          |
| chr8 | 100729417 | 100729644 | VPS13B | NM_017890 | 62 | 61 | 37    | 203     | 462  | 20461 | 89,74  | 91,1        |

|      |           |           |         |           |    |    |       |        |      |        |        |            |
|------|-----------|-----------|---------|-----------|----|----|-------|--------|------|--------|--------|------------|
| chr8 | 100732636 | 100732836 | VPS13B  | NM_017890 | 62 | 61 | 38    | 208    | 340  | 15004  | 74,65  | 69,7       |
| chr8 | 100733118 | 100733312 | VPS13B  | NM_017890 | 62 | 61 | 39    | 185    | 434  | 17928  | 91,94  | 85,4       |
| chr8 | 100778999 | 100779199 | VPS13B  | NM_017890 | 62 | 61 | 40    | 197    | 119  | 5302   | 26,38  | 100        |
| chr8 | 100789020 | 100789223 | VPS13B  | NM_017890 | 62 | 61 | 41    | 182    | 1337 | 55744  | 273,25 | 90,7       |
| chr8 | 100790934 | 100791297 | VPS13B  | NM_017890 | 62 | 61 | 42    | 350    | 1597 | 73826  | 202,82 | 93,1       |
| chr8 | 100796478 | 100796651 | VPS13B  | NM_017890 | 62 | 61 | 43    | 162    | 485  | 20896  | 120,09 | 67,3       |
| chr8 | 100821574 | 100821795 | VPS13B  | NM_017890 | 62 | 61 | 44    | 156    | 375  | 16107  | 72,55  | 100        |
| chr8 | 100829786 | 100830084 | VPS13B  | NM_017890 | 62 | 61 | 45    | 264    | 951  | 43323  | 144,89 | 93,2       |
| chr8 | 100830698 | 100831138 | VPS13B  | NM_017890 | 62 | 61 | 46,47 | 84.176 | 441  | 18942  | 42,95  | 77,4,100.0 |
| chr8 | 100831621 | 100831839 | VPS13B  | NM_017890 | 62 | 61 | 48    | 171    | 199  | 8522   | 38,91  | 100        |
| chr8 | 100832110 | 100832334 | VPS13B  | NM_017890 | 62 | 61 | 49    | 202    | 402  | 16787  | 74,61  | 92,1       |
| chr8 | 100833515 | 100833727 | VPS13B  | NM_017890 | 62 | 61 | 50    | 189    | 322  | 13758  | 64,59  | 100        |
| chr8 | 100836092 | 100836286 | VPS13B  | NM_017890 | 62 | 61 | 51    | 147    | 126  | 5248   | 26,91  | 78,2       |
| chr8 | 100844622 | 100844923 | VPS13B  | NM_017890 | 62 | 61 | 52    | 284    | 401  | 17913  | 59,31  | 91,2       |
| chr8 | 100847358 | 100847543 | VPS13B  | NM_017890 | 62 | 61 | 53    | 128    | 558  | 23926  | 128,63 | 93         |
| chr8 | 100847766 | 100847951 | VPS13B  | NM_017890 | 62 | 61 | 54    | 200    | 487  | 22480  | 120,86 | 92,5       |
| chr8 | 100860962 | 100861174 | VPS13B  | NM_017890 | 62 | 61 | 55    | 119    | 273  | 11575  | 54,34  | 100        |
| chr8 | 100865610 | 100866438 | VPS13B  | NM_017890 | 62 | 61 | 56    | 806    | 2021 | 97154  | 117,19 | 94,3       |
| chr8 | 100871591 | 100871785 | VPS13B  | NM_017890 | 62 | 61 | 57    | 177    | 114  | 4968   | 25,48  | 66,7       |
| chr8 | 100873931 | 100874113 | VPS13B  | NM_017890 | 62 | 61 | 58    | 171    | 354  | 16293  | 89,03  | 64,3       |
| chr8 | 100880435 | 100880650 | VPS13B  | NM_017890 | 62 | 61 | 59    | 177    | 273  | 11968  | 55,41  | 75,7       |
| chr8 | 100882957 | 100883166 | VPS13B  | NM_017890 | 62 | 61 | 60    | 103    | 387  | 16706  | 79,55  | 100        |
| chr8 | 100883597 | 100883886 | VPS13B  | NM_017890 | 62 | 61 | 61    | 250    | 763  | 33359  | 115,03 | 84,4       |
| chr8 | 100887580 | 100887958 | VPS13B  | NM_017890 | 62 | 61 | 62    | 249    | 764  | 36331  | 95,86  | 100        |
| chr8 | 117859666 | 117859952 | RAD21   | NM_006265 | 14 | 13 | 14    | 192    | 622  | 28162  | 98,13  | 100        |
| chr8 | 117861199 | 117861369 | RAD21   | NM_006265 | 14 | 13 | 13    | 84     | 577  | 24021  | 140,47 | 83,3       |
| chr8 | 117862927 | 117863103 | RAD21   | NM_006265 | 14 | 13 | 12    | 150    | 66   | 2596   | 14,67  | 53,3       |
| chr8 | 117864097 | 117864457 | RAD21   | NM_006265 | 14 | 13 | 11    | 149    | 1274 | 58579  | 162,27 | 100        |
| chr8 | 117864842 | 117865030 | RAD21   | NM_006265 | 14 | 13 | 10    | 160    | 23   | 947    | 5,01   | 66,2       |
| chr8 | 117866515 | 117866798 | RAD21   | NM_006265 | 14 | 13 | 9     | 224    | 569  | 26608  | 93,69  | 86,2       |
| chr8 | 117868440 | 117868610 | RAD21   | NM_006265 | 14 | 13 | 8     | 123    | 204  | 8039   | 47,01  | 71,5       |
| chr8 | 117868922 | 117869095 | RAD21   | NM_006265 | 14 | 13 | 7     | 126    | 287  | 12999  | 74,71  | 70,6       |
| chr8 | 117869583 | 117869765 | RAD21   | NM_006265 | 14 | 13 | 6     | 207    | 295  | 11388  | 62,23  | 62,8       |
| chr8 | 117870612 | 117870788 | RAD21   | NM_006265 | 14 | 13 | 5     | 107    | 378  | 16503  | 93,24  | 80,4       |
| chr8 | 117874095 | 117874277 | RAD21   | NM_006265 | 14 | 13 | 4     | 100    | 738  | 32271  | 176,34 | 85         |
| chr8 | 117875408 | 117875584 | RAD21   | NM_006265 | 14 | 13 | 3     | 130    | 859  | 35159  | 198,64 | 70         |
| chr8 | 117878886 | 117879062 | RAD21   | NM_006265 | 14 | 13 | 2     | 144    | 61   | 2642   | 14,93  | 57,6       |
| chr8 | 117886839 | 117887276 | RAD21   | NM_006265 | 14 | 13 | 1     | 256    | 315  | 14230  | 32,49  | 100        |
| chr8 | 140630398 | 140631306 | KCNK9   | NM_016601 | 3  | 2  | 2     | 842    | 3031 | 145208 | 159,74 | 95,7       |
| chr8 | 140714947 | 140715301 | KCNK9   | NM_016601 | 3  | 2  | 1     | 283    | 517  | 24173  | 68,09  | 100        |
| chr8 | 140743217 | 140743435 | TRAPPC9 | NM_031466 | 23 | 23 | 23    | 168    | 46   | 1960   | 8,95   | 78,6       |
| chr8 | 140744241 | 140744548 | TRAPPC9 | NM_031466 | 23 | 23 | 22    | 224    | 157  | 6141   | 19,94  | 91,5       |
| chr8 | 140898124 | 140898336 | TRAPPC9 | NM_031466 | 23 | 23 | 21    | 91     | 152  | 6840   | 32,11  | 98,9       |
| chr8 | 140922416 | 140922619 | TRAPPC9 | NM_031466 | 23 | 23 | 20    | 154    | 264  | 11456  | 56,16  | 83,8       |
| chr8 | 140998954 | 140999160 | TRAPPC9 | NM_031466 | 23 | 23 | 19    | 111    | 182  | 6925   | 33,45  | 82         |
| chr8 | 141034079 | 141034270 | TRAPPC9 | NM_031466 | 23 | 23 | 18    | 143    | 69   | 2802   | 14,59  | 68,5       |
| chr8 | 141231558 | 141231734 | TRAPPC9 | NM_031466 | 23 | 23 | 17    | 125    | 306  | 13112  | 74,08  | 100        |
| chr8 | 141262923 | 141263114 | TRAPPC9 | NM_031466 | 23 | 23 | 16    | 153    | 269  | 11883  | 61,89  | 69,3       |
| chr8 | 141285687 | 141285872 | TRAPPC9 | NM_031466 | 23 | 23 | 15    | 164    | 604  | 26331  | 141,56 | 70,7       |
| chr8 | 141293878 | 141294096 | TRAPPC9 | NM_031466 | 23 | 23 | 14    | 133    | 138  | 5737   | 26,2   | 82         |
| chr8 | 141297738 | 141297944 | TRAPPC9 | NM_031466 | 23 | 23 | 13    | 127    | 541  | 23696  | 114,47 | 75,6       |
| chr8 | 141301099 | 141301323 | TRAPPC9 | NM_031466 | 23 | 23 | 12    | 86     | 577  | 25346  | 112,65 | 91,9       |
| chr8 | 141310606 | 141310797 | TRAPPC9 | NM_031466 | 23 | 23 | 11    | 146    | 193  | 8095   | 42,16  | 74         |
| chr8 | 141321384 | 141321569 | TRAPPC9 | NM_031466 | 23 | 23 | 10    | 127    | 240  | 10090  | 54,25  | 70,9       |
| chr8 | 141370072 | 141370260 | TRAPPC9 | NM_031466 | 23 | 23 | 9     | 144    | 291  | 13048  | 69,04  | 77,8       |
| chr8 | 141381105 | 141381355 | TRAPPC9 | NM_031466 | 23 | 23 | 8     | 217    | 162  | 7045   | 28,07  | 80,6       |
| chr8 | 141407621 | 141407809 | TRAPPC9 | NM_031466 | 23 | 23 | 7     | 126    | 391  | 16954  | 89,7   | 72,2       |

|      |           |           |         |           |    |    |    |     |      |       |        |      |
|------|-----------|-----------|---------|-----------|----|----|----|-----|------|-------|--------|------|
| chr8 | 141415651 | 141415872 | TRAPPC9 | NM_031466 | 23 | 23 | 6  | 122 | 587  | 26862 | 121    | 100  |
| chr8 | 141436638 | 141436832 | TRAPPC9 | NM_031466 | 23 | 23 | 5  | 27  | 183  | 7520  | 38,56  | 100  |
| chr8 | 141445105 | 141445326 | TRAPPC9 | NM_031466 | 23 | 23 | 4  | 129 | 248  | 11103 | 50,01  | 89,9 |
| chr8 | 141449195 | 141449383 | TRAPPC9 | NM_031466 | 23 | 23 | 3  | 146 | 101  | 4313  | 22,82  | 69,9 |
| chr8 | 141460870 | 141461461 | TRAPPC9 | NM_031466 | 23 | 23 | 2  | 594 | 1371 | 63351 | 107,01 | 96,5 |
| chr8 | 141468395 | 141468776 | TRAPPC9 | NM_031466 | 23 | 23 | 1  | 284 | 273  | 10744 | 28,13  | 94,7 |
| chr9 | 214407    | 215505    | DOCK8   | NM_203447 | 48 | 48 | 1  | 53  | 972  | 44306 | 40,31  | 100  |
| chr9 | 271595    | 271816    | DOCK8   | NM_203447 | 48 | 48 | 2  | 103 | 438  | 19664 | 88,58  | 100  |
| chr9 | 286491    | 286694    | DOCK8   | NM_203447 | 48 | 48 | 3  | 176 | 418  | 17488 | 85,73  | 83   |
| chr9 | 289427    | 289621    | DOCK8   | NM_203447 | 48 | 48 | 4  | 72  | 222  | 9707  | 49,78  | 100  |
| chr9 | 304470    | 304682    | DOCK8   | NM_203447 | 48 | 48 | 5  | 124 | 203  | 9010  | 42,3   | 82,3 |
| chr9 | 311986    | 312571    | DOCK8   | NM_203447 | 48 | 48 | 6  | 213 | 1199 | 57577 | 98,25  | 85   |
| chr9 | 316922    | 317119    | DOCK8   | NM_203447 | 48 | 48 | 7  | 86  | 172  | 7341  | 37,08  | 89,5 |
| chr9 | 325600    | 325788    | DOCK8   | NM_203447 | 48 | 48 | 8  | 67  | 373  | 15930 | 84,29  | 100  |
| chr9 | 327948    | 328133    | DOCK8   | NM_203447 | 48 | 48 | 9  | 150 | 514  | 21539 | 115,8  | 74,7 |
| chr9 | 332352    | 332540    | DOCK8   | NM_203447 | 48 | 48 | 10 | 81  | 295  | 12313 | 65,15  | 100  |
| chr9 | 334147    | 334344    | DOCK8   | NM_203447 | 48 | 48 | 11 | 160 | 195  | 8260  | 41,72  | 75   |
| chr9 | 336498    | 336683    | DOCK8   | NM_203447 | 48 | 48 | 12 | 137 | 165  | 6973  | 37,49  | 74,5 |
| chr9 | 338961    | 339167    | DOCK8   | NM_203447 | 48 | 48 | 13 | 94  | 257  | 11436 | 55,25  | 100  |
| chr9 | 340107    | 340313    | DOCK8   | NM_203447 | 48 | 48 | 14 | 163 | 250  | 11367 | 54,91  | 95,1 |
| chr9 | 367999    | 368264    | DOCK8   | NM_203447 | 48 | 48 | 15 | 118 | 1024 | 41798 | 157,14 | 100  |
| chr9 | 370167    | 370370    | DOCK8   | NM_203447 | 48 | 48 | 16 | 71  | 342  | 15189 | 74,46  | 100  |
| chr9 | 371324    | 371521    | DOCK8   | NM_203447 | 48 | 48 | 17 | 139 | 333  | 14082 | 71,12  | 67,6 |
| chr9 | 372150    | 372320    | DOCK8   | NM_203447 | 48 | 48 | 18 | 102 | 207  | 8928  | 52,21  | 100  |
| chr9 | 376217    | 376414    | DOCK8   | NM_203447 | 48 | 48 | 19 | 96  | 140  | 6047  | 30,54  | 92,7 |
| chr9 | 376881    | 377173    | DOCK8   | NM_203447 | 48 | 48 | 20 | 235 | 324  | 15087 | 51,49  | 83,8 |
| chr9 | 379677    | 379892    | DOCK8   | NM_203447 | 48 | 48 | 21 | 165 | 967  | 42913 | 198,67 | 73,9 |
| chr9 | 382573    | 382767    | DOCK8   | NM_203447 | 48 | 48 | 22 | 173 | 154  | 6405  | 32,85  | 65,3 |
| chr9 | 386230    | 386403    | DOCK8   | NM_203447 | 48 | 48 | 23 | 96  | 46   | 2021  | 11,61  | 76   |
| chr9 | 390418    | 390633    | DOCK8   | NM_203447 | 48 | 48 | 24 | 96  | 152  | 7055  | 32,66  | 100  |
| chr9 | 396771    | 396953    | DOCK8   | NM_203447 | 48 | 48 | 25 | 150 | 175  | 7640  | 41,75  | 100  |
| chr9 | 399045    | 399233    | DOCK8   | NM_203447 | 48 | 48 | 26 | 114 | 125  | 5349  | 28,3   | 77,2 |
| chr9 | 404868    | 405083    | DOCK8   | NM_203447 | 48 | 48 | 27 | 156 | 203  | 8790  | 40,69  | 100  |
| chr9 | 406971    | 407162    | DOCK8   | NM_203447 | 48 | 48 | 28 | 140 | 303  | 12985 | 67,63  | 70,7 |
| chr9 | 414703    | 414909    | DOCK8   | NM_203447 | 48 | 48 | 29 | 170 | 342  | 13915 | 67,22  | 75,3 |
| chr9 | 418022    | 418252    | DOCK8   | NM_203447 | 48 | 48 | 30 | 140 | 696  | 31956 | 138,34 | 100  |
| chr9 | 420463    | 420636    | DOCK8   | NM_203447 | 48 | 48 | 31 | 183 | 601  | 23039 | 132,41 | 66,1 |
| chr9 | 420856    | 421041    | DOCK8   | NM_203447 | 48 | 48 | 32 | 130 | 478  | 20031 | 107,69 | 71,5 |
| chr9 | 421988    | 422194    | DOCK8   | NM_203447 | 48 | 48 | 33 | 88  | 500  | 22641 | 109,38 | 100  |
| chr9 | 426769    | 426975    | DOCK8   | NM_203447 | 48 | 48 | 34 | 97  | 292  | 11947 | 57,71  | 93,8 |
| chr9 | 428400    | 428600    | DOCK8   | NM_203447 | 48 | 48 | 35 | 135 | 927  | 37770 | 187,91 | 71,9 |
| chr9 | 429605    | 429805    | DOCK8   | NM_203447 | 48 | 48 | 36 | 153 | 227  | 9154  | 45,54  | 68   |
| chr9 | 432084    | 432272    | DOCK8   | NM_203447 | 48 | 48 | 37 | 159 | 225  | 8607  | 45,54  | 67,3 |
| chr9 | 433824    | 434009    | DOCK8   | NM_203447 | 48 | 48 | 38 | 101 | 494  | 22072 | 118,67 | 100  |
| chr9 | 434703    | 434909    | DOCK8   | NM_203447 | 48 | 48 | 39 | 193 | 369  | 16830 | 81,3   | 65,8 |
| chr9 | 439165    | 439344    | DOCK8   | NM_203447 | 48 | 48 | 40 | 144 | 387  | 17357 | 96,43  | 69,4 |
| chr9 | 441200    | 441379    | DOCK8   | NM_203447 | 48 | 48 | 41 | 132 | 499  | 20271 | 112,62 | 71,2 |
| chr9 | 441808    | 442026    | DOCK8   | NM_203447 | 48 | 48 | 42 | 135 | 245  | 10766 | 49,16  | 100  |
| chr9 | 443404    | 443598    | DOCK8   | NM_203447 | 48 | 48 | 43 | 90  | 365  | 15682 | 80,42  | 100  |
| chr9 | 446302    | 446555    | DOCK8   | NM_203447 | 48 | 48 | 44 | 237 | 610  | 27065 | 106,56 | 78,5 |
| chr9 | 449707    | 449880    | DOCK8   | NM_203447 | 48 | 48 | 45 | 144 | 318  | 13285 | 76,35  | 67,4 |
| chr9 | 451978    | 452163    | DOCK8   | NM_203447 | 48 | 48 | 46 | 107 | 290  | 11879 | 63,87  | 100  |
| chr9 | 463495    | 463701    | DOCK8   | NM_203447 | 48 | 48 | 47 | 171 | 382  | 16100 | 77,78  | 100  |
| chr9 | 464090    | 464385    | DOCK8   | NM_203447 | 48 | 48 | 48 | 61  | 314  | 13694 | 46,26  | 100  |
| chr9 | 2028917   | 2029203   | SMARCA2 | NM_003070 | 34 | 33 | 2  | 225 | 217  | 9544  | 33,25  | 80,4 |
| chr9 | 2032865   | 2033044   | SMARCA2 | NM_003070 | 34 | 33 | 3  | 130 | 165  | 7025  | 39,03  | 71,5 |
| chr9 | 2039387   | 2039747   | SMARCA2 | NM_003070 | 34 | 33 | 4  | 435 | 656  | 31026 | 85,94  | 64,8 |

|      |         |         |         |           |    |    |       |             |      |        |        |                  |
|------|---------|---------|---------|-----------|----|----|-------|-------------|------|--------|--------|------------------|
| chr9 | 2047291 | 2047547 | SMARCA2 | NM_003070 | 34 | 33 | 5     | 256         | 29   | 1135   | 4,42   | 75,8             |
| chr9 | 2054529 | 2054735 | SMARCA2 | NM_003070 | 34 | 33 | 6     | 127         | 886  | 34151  | 164,98 | 100              |
| chr9 | 2056724 | 2056930 | SMARCA2 | NM_003070 | 34 | 33 | 7     | 174         | 236  | 10688  | 51,63  | 70,1             |
| chr9 | 2058202 | 2058411 | SMARCA2 | NM_003070 | 34 | 33 | 8     | 174         | 479  | 19728  | 93,94  | 69,5             |
| chr9 | 2060752 | 2060928 | SMARCA2 | NM_003070 | 34 | 33 | 9     | 171         | 250  | 10825  | 61,16  | 66,1             |
| chr9 | 2070374 | 2070583 | SMARCA2 | NM_003070 | 34 | 33 | 10    | 54          | 186  | 7854   | 37,4   | 100              |
| chr9 | 2073191 | 2073421 | SMARCA2 | NM_003070 | 34 | 33 | 11    | 131         | 572  | 26185  | 113,35 | 100              |
| chr9 | 2073521 | 2073724 | SMARCA2 | NM_003070 | 34 | 33 | 12    | 58          | 205  | 8587   | 42,09  | 100              |
| chr9 | 2076178 | 2076375 | SMARCA2 | NM_003070 | 34 | 33 | 13    | 101         | 109  | 4333   | 21,88  | 100              |
| chr9 | 2077677 | 2077859 | SMARCA2 | NM_003070 | 34 | 33 | 14    | 148         | 479  | 19942  | 108,97 | 67,6             |
| chr9 | 2081762 | 2081965 | SMARCA2 | NM_003070 | 34 | 33 | 15    | 164         | 395  | 17301  | 84,81  | 81,7             |
| chr9 | 2083309 | 2083500 | SMARCA2 | NM_003070 | 34 | 33 | 16    | 67          | 640  | 24734  | 128,82 | 100              |
| chr9 | 2083995 | 2084213 | SMARCA2 | NM_003070 | 34 | 33 | 17    | 111         | 261  | 11279  | 51,5   | 100              |
| chr9 | 2086824 | 2087119 | SMARCA2 | NM_003070 | 34 | 33 | 18    | 243         | 1013 | 45200  | 152,7  | 100              |
| chr9 | 2088486 | 2088692 | SMARCA2 | NM_003070 | 34 | 33 | 19    | 114         | 529  | 21510  | 103,91 | 100              |
| chr9 | 2096661 | 2096876 | SMARCA2 | NM_003070 | 34 | 33 | 20    | 108         | 358  | 15067  | 69,75  | 96,3             |
| chr9 | 2097285 | 2097500 | SMARCA2 | NM_003070 | 34 | 33 | 21    | 87          | 161  | 6920   | 32,04  | 100              |
| chr9 | 2101567 | 2101758 | SMARCA2 | NM_003070 | 34 | 33 | 22    | 47          | 241  | 9338   | 48,64  | 100              |
| chr9 | 2103946 | 2104155 | SMARCA2 | NM_003070 | 34 | 33 | 23    | 167         | 570  | 26347  | 125,46 | 91,6             |
| chr9 | 2110208 | 2110408 | SMARCA2 | NM_003070 | 34 | 33 | 24    | 164         | 163  | 6900   | 34,33  | 94,5             |
| chr9 | 2115870 | 2116135 | SMARCA2 | NM_003070 | 34 | 33 | 25    | 228         | 283  | 12752  | 47,94  | 78,9             |
| chr9 | 2119423 | 2119632 | SMARCA2 | NM_003070 | 34 | 33 | 26    | 78          | 304  | 13504  | 64,3   | 100              |
| chr9 | 2123753 | 2124039 | SMARCA2 | NM_003070 | 34 | 33 | 27    | 219         | 377  | 17512  | 61,02  | 84,5             |
| chr9 | 2161618 | 2161901 | SMARCA2 | NM_003070 | 34 | 33 | 28    | 218         | 239  | 10412  | 36,66  | 99,1             |
| chr9 | 2170387 | 2170575 | SMARCA2 | NM_003070 | 34 | 33 | 29    | 54          | 648  | 26427  | 139,83 | 100              |
| chr9 | 2181508 | 2181678 | SMARCA2 | NM_003070 | 34 | 33 | 30    | 106         | 397  | 17926  | 104,83 | 100              |
| chr9 | 2182106 | 2182321 | SMARCA2 | NM_003070 | 34 | 33 | 31    | 102         | 288  | 11699  | 54,16  | 100              |
| chr9 | 2185998 | 2186186 | SMARCA2 | NM_003070 | 34 | 33 | 32    | 133         | 402  | 17238  | 91,21  | 68,4             |
| chr9 | 2191176 | 2191379 | SMARCA2 | NM_003070 | 34 | 33 | 33    | 143         | 168  | 7703   | 37,76  | 79,7             |
| chr9 | 2621815 | 2622228 | VLDLR   | NM_003383 | 19 | 19 | 1     | 82          | 240  | 11195  | 27,04  | 47,6             |
| chr9 | 2635397 | 2635609 | VLDLR   | NM_003383 | 19 | 19 | 2     | 120         | 411  | 17271  | 81,08  | 100              |
| chr9 | 2639759 | 2639944 | VLDLR   | NM_003383 | 19 | 19 | 3     | 123         | 449  | 19602  | 105,39 | 69,9             |
| chr9 | 2641349 | 2641549 | VLDLR   | NM_003383 | 19 | 19 | 4     | 123         | 327  | 14319  | 71,24  | 100              |
| chr9 | 2643073 | 2643919 | VLDLR   | NM_003383 | 19 | 19 | 5,6,7 | 372.123.123 | 5943 | 289881 | 342,24 | 100.0,100.0,67.5 |
| chr9 | 2644727 | 2645075 | VLDLR   | NM_003383 | 19 | 19 | 8,9   | 120.126     | 1148 | 51119  | 146,47 | 100.0,94.4       |
| chr9 | 2645526 | 2645714 | VLDLR   | NM_003383 | 19 | 19 | 10    | 172         | 283  | 12620  | 66,77  | 82               |
| chr9 | 2646242 | 2646519 | VLDLR   | NM_003383 | 19 | 19 | 11    | 219         | 1488 | 66664  | 239,8  | 84,9             |
| chr9 | 2647447 | 2647668 | VLDLR   | NM_003383 | 19 | 19 | 12    | 119         | 509  | 20006  | 90,12  | 100              |
| chr9 | 2648177 | 2648392 | VLDLR   | NM_003383 | 19 | 19 | 13    | 140         | 627  | 28209  | 130,6  | 100              |
| chr9 | 2648609 | 2648803 | VLDLR   | NM_003383 | 19 | 19 | 14    | 142         | 523  | 22678  | 116,3  | 95,1             |
| chr9 | 2650267 | 2650473 | VLDLR   | NM_003383 | 19 | 19 | 15    | 147         | 302  | 12947  | 62,55  | 70,7             |
| chr9 | 2651353 | 2651556 | VLDLR   | NM_003383 | 19 | 19 | 16    | 84          | 606  | 25967  | 127,29 | 100              |
| chr9 | 2651810 | 2652022 | VLDLR   | NM_003383 | 19 | 19 | 17    | 81          | 430  | 19538  | 91,73  | 100              |
| chr9 | 2652695 | 2652889 | VLDLR   | NM_003383 | 19 | 19 | 18    | 170         | 232  | 9945   | 51     | 64,7             |
| chr9 | 2653758 | 2654047 | VLDLR   | NM_003383 | 19 | 19 | 19    | 36          | 523  | 23969  | 82,65  | 100              |
| chr9 | 6532984 | 6533104 | GLDC    | NM_000170 | 25 | 25 | 25    | 144         | 38   | 1267   | 10,47  | 61,1             |
| chr9 | 6534587 | 6534802 | GLDC    | NM_000170 | 25 | 25 | 24    | 81          | 782  | 34549  | 159,95 | 100              |
| chr9 | 6536124 | 6536324 | GLDC    | NM_000170 | 25 | 25 | 23    | 173         | 211  | 9289   | 46,21  | 65,3             |
| chr9 | 6540073 | 6540264 | GLDC    | NM_000170 | 25 | 25 | 22    | 96          | 386  | 16662  | 86,78  | 77,1             |
| chr9 | 6550833 | 6551006 | GLDC    | NM_000170 | 25 | 25 | 21    | 112         | 189  | 8113   | 46,63  | 73,2             |
| chr9 | 6553413 | 6553598 | GLDC    | NM_000170 | 25 | 25 | 20    | 142         | 140  | 5722   | 30,76  | 68,3             |
| chr9 | 6554699 | 6554887 | GLDC    | NM_000170 | 25 | 25 | 19    | 113         | 216  | 9498   | 50,25  | 73,5             |
| chr9 | 6556202 | 6556402 | GLDC    | NM_000170 | 25 | 25 | 18    | 150         | 163  | 7038   | 35,01  | 67,3             |
| chr9 | 6558596 | 6558766 | GLDC    | NM_000170 | 25 | 25 | 17    | 126         | 314  | 14543  | 85,05  | 70,6             |
| chr9 | 6565366 | 6565551 | GLDC    | NM_000170 | 25 | 25 | 16    | 76          | 882  | 35758  | 192,25 | 84,2             |
| chr9 | 6587186 | 6587386 | GLDC    | NM_000170 | 25 | 25 | 15    | 143         | 135  | 5442   | 27,07  | 68,5             |
| chr9 | 6588311 | 6588656 | GLDC    | NM_000170 | 25 | 25 | 14,13 | 42,85       | 1316 | 60889  | 175,98 | 100.0,45.9       |



|      |          |          |         |              |    |    |           |                  |      |        |        |                              |
|------|----------|----------|---------|--------------|----|----|-----------|------------------|------|--------|--------|------------------------------|
| chr9 | 6589218  | 6589397  | GLDC    | NM_000170    | 25 | 25 | 12        | 98               | 294  | 12229  | 67,94  | 76,5                         |
| chr9 | 6592157  | 6592342  | GLDC    | NM_000170    | 25 | 25 | 11        | 81               | 257  | 11187  | 60,15  | 82,7                         |
| chr9 | 6592895  | 6593095  | GLDC    | NM_000170    | 25 | 25 | 10        | 140              | 648  | 27435  | 136,49 | 68,6                         |
| chr9 | 6595041  | 6595226  | GLDC    | NM_000170    | 25 | 25 | 9         | 106              | 51   | 2179   | 11,72  | 74,5                         |
| chr9 | 6602020  | 6602220  | GLDC    | NM_000170    | 25 | 25 | 8         | 97               | 540  | 22832  | 113,59 | 100                          |
| chr9 | 6604660  | 6604860  | GLDC    | NM_000170    | 25 | 25 | 7         | 197              | 87   | 3582   | 17,82  | 63,5                         |
| chr9 | 6605179  | 6605364  | GLDC    | NM_000170    | 25 | 25 | 6         | 148              | 1289 | 54843  | 294,85 | 67,6                         |
| chr9 | 6606605  | 6606775  | GLDC    | NM_000170    | 25 | 25 | 5         | 78               | 437  | 19480  | 113,92 | 83,3                         |
| chr9 | 6610098  | 6610298  | GLDC    | NM_000170    | 25 | 25 | 4         | 165              | 255  | 10545  | 52,46  | 64,8                         |
| chr9 | 6620226  | 6620405  | GLDC    | NM_000170    | 25 | 25 | 3         | 136              | 341  | 14532  | 80,73  | 69,1                         |
| chr9 | 6644627  | 6644815  | GLDC    | NM_000170    | 25 | 25 | 2         | 79               | 189  | 8077   | 42,74  | 83,5                         |
| chr9 | 6645151  | 6645271  | GLDC    | NM_000170    | 25 | 25 | 1         | 255              | 9    | 334    | 2,76   | 10,6                         |
| chr9 | 6645311  | 6645618  | GLDC    | NM_000170    | 25 | 25 | 1         | 255              | 4    | 192    | 0,62   | 74,1                         |
| chr9 | 32973420 | 32973727 | APTX    | NM_001195248 | 8  | 8  | 8         | 155              | 482  | 21193  | 68,81  | 100                          |
| chr9 | 32974362 | 32974565 | APTX    | NM_001195248 | 8  | 8  | 7         | 104              | 130  | 5920   | 29,02  | 100                          |
| chr9 | 32984655 | 32984941 | APTX    | NM_001195248 | 8  | 8  | 6         | 227              | 1431 | 64077  | 223,26 | 88,5                         |
| chr9 | 32987473 | 32987827 | APTX    | NM_001195248 | 8  | 8  | 4         | 299              | 1698 | 79068  | 222,73 | 95,7                         |
| chr9 | 32987996 | 32988199 | APTX    | NM_001195248 | 8  | 8  | 3         | 51               | 714  | 31718  | 155,48 | 100                          |
| chr9 | 32989651 | 32990002 | APTX    | NM_001195248 | 8  | 8  | 2         | 137              | 1398 | 61283  | 174,1  | 100                          |
| chr9 | 33001560 | 33001754 | APTX    | NM_001195248 | 8  | 8  | 1         | 38               | 963  | 38909  | 199,53 | 100                          |
| chr9 | 33113324 | 33113625 | B4GALT1 | NM_001497    | 6  | 6  | 6         | 133              | 404  | 17892  | 59,25  | 100                          |
| chr9 | 33113723 | 33113908 | B4GALT1 | NM_001497    | 6  | 6  | 5         | 105              | 177  | 7820   | 42,04  | 100                          |
| chr9 | 33115910 | 33116116 | B4GALT1 | NM_001497    | 6  | 6  | 4         | 123              | 144  | 6052   | 29,24  | 100                          |
| chr9 | 33120404 | 33120598 | B4GALT1 | NM_001497    | 6  | 6  | 3         | 188              | 402  | 16975  | 87,05  | 96,8                         |
| chr9 | 33135092 | 33135369 | B4GALT1 | NM_001497    | 6  | 6  | 2         | 236              | 2697 | 120879 | 434,82 | 77,5                         |
| chr9 | 33166681 | 33167278 | B4GALT1 | NM_001497    | 6  | 6  | 1         | 412              | 61   | 2764   | 4,62   | 100                          |
| chr9 | 34646568 | 34646750 | GALT    | NM_000155    | 11 | 11 | 1         | 82               | 77   | 3171   | 17,33  | 59,8                         |
| chr9 | 34647034 | 34647231 | GALT    | NM_000155    | 11 | 11 | 2         | 170              | 410  | 17139  | 86,56  | 85,9                         |
| chr9 | 34647519 | 34648611 | GALT    | NM_000155    | 11 | 11 | 3,4,5,6,7 | 76,49,130,57,123 | 4094 | 197708 | 180,89 | 60,5,100,0,100,0,100,0,100,0 |
| chr9 | 34648753 | 34649122 | GALT    | NM_000155    | 11 | 11 | 8,9       | 133,84           | 919  | 40211  | 108,68 | 100,0,100,0                  |
| chr9 | 34649308 | 34649529 | GALT    | NM_000155    | 11 | 11 | 10        | 155              | 518  | 23431  | 105,55 | 79,4                         |
| chr9 | 34650282 | 34650577 | GALT    | NM_000155    | 11 | 11 | 11        | 81               | 327  | 15858  | 53,57  | 100                          |
| chr9 | 35088974 | 35089521 | PIGO    | NM_152850    | 12 | 11 | 12,11     | 130,71           | 1361 | 66100  | 120,62 | 100,0,100,0                  |
| chr9 | 35089999 | 35090620 | PIGO    | NM_152850    | 12 | 11 | 10,9      | 215,207          | 1559 | 72403  | 116,4  | 100,0,76,3                   |
| chr9 | 35091160 | 35092720 | PIGO    | NM_152850    | 12 | 11 | 8,7       | 52,225           | 3161 | 154191 | 98,78  | 100,0,80,4                   |
| chr9 | 35093019 | 35093646 | PIGO    | NM_152850    | 12 | 11 | 6,5       | 180,160          | 1298 | 62148  | 98,96  | 100,0,100,0                  |
| chr9 | 35093820 | 35094029 | PIGO    | NM_152850    | 12 | 11 | 4         | 124              | 2039 | 91365  | 435,07 | 100                          |
| chr9 | 35094226 | 35094423 | PIGO    | NM_152850    | 12 | 11 | 3         | 144              | 323  | 13275  | 67,05  | 91                           |
| chr9 | 35094971 | 35095521 | PIGO    | NM_152850    | 12 | 11 | 2         | 511              | 1423 | 64087  | 116,31 | 92                           |
| chr9 | 93976449 | 93976720 | AUH     | NM_001698    | 10 | 10 | 10        | 78               | 629  | 29166  | 107,23 | 100                          |
| chr9 | 93978231 | 93978419 | AUH     | NM_001698    | 10 | 10 | 9         | 48               | 333  | 13812  | 73,08  | 100                          |
| chr9 | 93979513 | 93979722 | AUH     | NM_001698    | 10 | 10 | 8         | 51               | 831  | 37632  | 179,2  | 100                          |
| chr9 | 93983023 | 93983208 | AUH     | NM_001698    | 10 | 10 | 7         | 188              | 426  | 17821  | 95,81  | 64,9                         |
| chr9 | 94058185 | 94058397 | AUH     | NM_001698    | 10 | 10 | 6         | 57               | 369  | 15843  | 74,38  | 100                          |
| chr9 | 94060214 | 94060399 | AUH     | NM_001698    | 10 | 10 | 5         | 93               | 385  | 17506  | 94,12  | 100                          |
| chr9 | 94087554 | 94087730 | AUH     | NM_001698    | 10 | 10 | 4         | 87               | 248  | 11563  | 65,33  | 100                          |
| chr9 | 94118094 | 94118371 | AUH     | NM_001698    | 10 | 10 | 3,2       | 88,68            | 368  | 16833  | 60,55  | 100,0,2,9                    |
| chr9 | 94123893 | 94124176 | AUH     | NM_001698    | 10 | 10 | 1         | 262              | 29   | 1307   | 4,6    | 100                          |
| chr9 | 98208571 | 98208765 | PTCH1   | NM_000264    | 24 | 23 | 24        | 3410             | 136  | 6057   | 31,06  | 3                            |
| chr9 | 98209217 | 98209829 | PTCH1   | NM_000264    | 24 | 23 | 23        | 540              | 339  | 14655  | 23,91  | 95,7                         |
| chr9 | 98211382 | 98211689 | PTCH1   | NM_000264    | 24 | 23 | 22        | 255              | 641  | 25298  | 82,14  | 87,8                         |
| chr9 | 98212045 | 98212242 | PTCH1   | NM_000264    | 24 | 23 | 21        | 100              | 231  | 10451  | 52,78  | 100                          |
| chr9 | 98215805 | 98216005 | PTCH1   | NM_000264    | 24 | 23 | 20        | 143              | 626  | 26554  | 132,11 | 68,5                         |
| chr9 | 98218469 | 98218654 | PTCH1   | NM_000264    | 24 | 23 | 19        | 138              | 882  | 39285  | 211,21 | 70,3                         |
| chr9 | 98220252 | 98220556 | PTCH1   | NM_000264    | 24 | 23 | 18        | 281              | 523  | 22991  | 75,38  | 93,2                         |
| chr9 | 98221945 | 98222124 | PTCH1   | NM_000264    | 24 | 23 | 17        | 184              | 268  | 10392  | 57,73  | 65,8                         |
| chr9 | 98224147 | 98224329 | PTCH1   | NM_000264    | 24 | 23 | 16        | 143              | 1361 | 60627  | 331,3  | 93,7                         |

|      |           |           |          |           |    |    |     |       |      |        |        |            |
|------|-----------|-----------|----------|-----------|----|----|-----|-------|------|--------|--------|------------|
| chr9 | 98229297  | 98229663  | PTCH1    | NM_000264 | 24 | 23 | 15  | 310   | 1786 | 84347  | 229,83 | 85,8       |
| chr9 | 98230953  | 98231396  | PTCH1    | NM_000264 | 24 | 23 | 14  | 403   | 664  | 30736  | 69,23  | 90,3       |
| chr9 | 98231996  | 98232205  | PTCH1    | NM_000264 | 24 | 23 | 13  | 119   | 1095 | 48094  | 229,02 | 93,3       |
| chr9 | 98238341  | 98238553  | PTCH1    | NM_000264 | 24 | 23 | 12  | 126   | 674  | 28725  | 134,86 | 80,2       |
| chr9 | 98238929  | 98239138  | PTCH1    | NM_000264 | 24 | 23 | 11  | 99    | 339  | 13846  | 65,93  | 99         |
| chr9 | 98239821  | 98240051  | PTCH1    | NM_000264 | 24 | 23 | 10  | 156   | 85   | 4018   | 17,39  | 100        |
| chr9 | 98240230  | 98240448  | PTCH1    | NM_000264 | 24 | 23 | 9   | 132   | 176  | 7431   | 33,93  | 84,8       |
| chr9 | 98241183  | 98241407  | PTCH1    | NM_000264 | 24 | 23 | 8   | 148   | 782  | 35851  | 159,34 | 85,1       |
| chr9 | 98242286  | 98242471  | PTCH1    | NM_000264 | 24 | 23 | 7   | 122   | 442  | 18363  | 98,73  | 71,3       |
| chr9 | 98242739  | 98242915  | PTCH1    | NM_000264 | 24 | 23 | 6   | 199   | 285  | 12763  | 72,11  | 66,3       |
| chr9 | 98244141  | 98244442  | PTCH1    | NM_000264 | 24 | 23 | 5,4 | 92,70 | 665  | 29914  | 99,05  | 100,0,38.6 |
| chr9 | 98248030  | 98248218  | PTCH1    | NM_000264 | 24 | 23 | 3   | 190   | 185  | 8285   | 43,84  | 66,8       |
| chr9 | 98268720  | 98268899  | PTCH1    | NM_000264 | 24 | 23 | 2   | 193   | 76   | 3213   | 17,85  | 83,9       |
| chr9 | 98270382  | 98270567  | PTCH1    | NM_000264 | 24 | 23 | 1   | 201   | 90   | 3900   | 20,97  | 62,2       |
| chr9 | 100437655 | 100437843 | XPA      | NM_000380 | 6  | 6  | 6   | 149   | 346  | 14397  | 76,17  | 82,6       |
| chr9 | 100447175 | 100447363 | XPA      | NM_000380 | 6  | 6  | 5   | 118   | 341  | 15010  | 79,42  | 100        |
| chr9 | 100449405 | 100449632 | XPA      | NM_000380 | 6  | 6  | 4   | 166   | 34   | 1489   | 6,53   | 83,7       |
| chr9 | 100451738 | 100451932 | XPA      | NM_000380 | 6  | 6  | 3   | 106   | 253  | 11039  | 56,61  | 100        |
| chr9 | 100455921 | 100456106 | XPA      | NM_000380 | 6  | 6  | 2   | 111   | 266  | 11177  | 60,09  | 100        |
| chr9 | 100459442 | 100459627 | XPA      | NM_000380 | 6  | 6  | 1   | 172   | 6    | 281    | 1,51   | 77,3       |
| chr9 | 101867329 | 101867538 | TGFBR1   | NM_004612 | 9  | 9  | 1   | 97    | 0    | 0      | 0      | 52,6       |
| chr9 | 101891098 | 101891378 | TGFBR1   | NM_004612 | 9  | 9  | 2   | 246   | 227  | 9975   | 35,5   | 98,4       |
| chr9 | 101894745 | 101895040 | TGFBR1   | NM_004612 | 9  | 9  | 3   | 231   | 925  | 40477  | 136,75 | 100        |
| chr9 | 101900148 | 101900410 | TGFBR1   | NM_004612 | 9  | 9  | 4   | 231   | 527  | 23433  | 89,1   | 97         |
| chr9 | 101904753 | 101904935 | TGFBR1   | NM_004612 | 9  | 9  | 5   | 168   | 329  | 13589  | 74,26  | 70,2       |
| chr9 | 101907003 | 101907191 | TGFBR1   | NM_004612 | 9  | 9  | 6   | 157   | 341  | 14465  | 76,53  | 100        |
| chr9 | 101908761 | 101908964 | TGFBR1   | NM_004612 | 9  | 9  | 7   | 125   | 568  | 24258  | 118,91 | 100        |
| chr9 | 101909942 | 101910136 | TGFBR1   | NM_004612 | 9  | 9  | 8   | 131   | 331  | 15107  | 77,47  | 95,4       |
| chr9 | 101911397 | 101911742 | TGFBR1   | NM_004612 | 9  | 9  | 9   | 126   | 788  | 37335  | 107,9  | 100        |
| chr9 | 101980116 | 101981181 | ALG2     | NM_033087 | 2  | 2  | 2   | 903   | 2023 | 98108  | 92,03  | 100        |
| chr9 | 101983863 | 101984232 | ALG2     | NM_033087 | 2  | 2  | 1   | 348   | 22   | 1003   | 2,71   | 90,2       |
| chr9 | 108337237 | 108337419 | FKTN     | NM_006731 | 10 | 9  | 2   | 105   | 402  | 17355  | 94,84  | 100        |
| chr9 | 108358868 | 108359083 | FKTN     | NM_006731 | 10 | 9  | 3   | 60    | 146  | 6564   | 30,39  | 100        |
| chr9 | 108363496 | 108363672 | FKTN     | NM_006731 | 10 | 9  | 4   | 204   | 515  | 22079  | 124,74 | 65,7       |
| chr9 | 108366449 | 108366756 | FKTN     | NM_006731 | 10 | 9  | 5   | 278   | 1298 | 58693  | 190,56 | 93,9       |
| chr9 | 108370062 | 108370250 | FKTN     | NM_006731 | 10 | 9  | 6   | 133   | 541  | 22789  | 120,58 | 100        |
| chr9 | 108377523 | 108377714 | FKTN     | NM_006731 | 10 | 9  | 7   | 130   | 355  | 14812  | 77,15  | 100        |
| chr9 | 108380272 | 108380454 | FKTN     | NM_006731 | 10 | 9  | 8   | 134   | 272  | 11513  | 62,91  | 76,1       |
| chr9 | 108382151 | 108382333 | FKTN     | NM_006731 | 10 | 9  | 9   | 128   | 58   | 2748   | 15,02  | 93         |
| chr9 | 108397271 | 108397622 | FKTN     | NM_006731 | 10 | 9  | 10  | 214   | 845  | 40875  | 116,12 | 100        |
| chr9 | 123151974 | 123152162 | CDK5RAP2 | NM_018249 | 38 | 38 | 37  | 47    | 221  | 9452   | 50,01  | 100        |
| chr9 | 123156767 | 123156937 | CDK5RAP2 | NM_018249 | 38 | 38 | 36  | 127   | 154  | 6077   | 35,54  | 100        |
| chr9 | 123163060 | 123163251 | CDK5RAP2 | NM_018249 | 38 | 38 | 35  | 144   | 256  | 10182  | 53,03  | 72,2       |
| chr9 | 123165121 | 123165431 | CDK5RAP2 | NM_018249 | 38 | 38 | 34  | 266   | 448  | 21479  | 69,06  | 86,1       |
| chr9 | 123166285 | 123166485 | CDK5RAP2 | NM_018249 | 38 | 38 | 33  | 78    | 330  | 14441  | 71,85  | 100        |
| chr9 | 123169327 | 123169607 | CDK5RAP2 | NM_018249 | 38 | 38 | 32  | 237   | 1191 | 51981  | 184,99 | 84,4       |
| chr9 | 123170586 | 123170804 | CDK5RAP2 | NM_018249 | 38 | 38 | 31  | 122   | 649  | 27619  | 126,11 | 100        |
| chr9 | 123171474 | 123171659 | CDK5RAP2 | NM_018249 | 38 | 38 | 30  | 190   | 136  | 5772   | 31,03  | 63,7       |
| chr9 | 123173602 | 123173778 | CDK5RAP2 | NM_018249 | 38 | 38 | 29  | 117   | 144  | 6272   | 35,44  | 100        |
| chr9 | 123177262 | 123177453 | CDK5RAP2 | NM_018249 | 38 | 38 | 28  | 120   | 171  | 7555   | 39,35  | 100        |
| chr9 | 123182057 | 123182263 | CDK5RAP2 | NM_018249 | 38 | 38 | 27  | 173   | 298  | 12792  | 61,8   | 100        |
| chr9 | 123184858 | 123185058 | CDK5RAP2 | NM_018249 | 38 | 38 | 26  | 49    | 263  | 11805  | 58,73  | 100        |
| chr9 | 123199593 | 123199873 | CDK5RAP2 | NM_018249 | 38 | 38 | 25  | 233   | 2561 | 117896 | 419,56 | 91,4       |
| chr9 | 123201684 | 123202293 | CDK5RAP2 | NM_018249 | 38 | 38 | 24  | 574   | 1358 | 66129  | 108,41 | 98,8       |
| chr9 | 123205813 | 123205983 | CDK5RAP2 | NM_018249 | 38 | 38 | 23  | 123   | 1520 | 62830  | 367,43 | 69,9       |
| chr9 | 123210073 | 123210359 | CDK5RAP2 | NM_018249 | 38 | 38 | 22  | 232   | 678  | 30197  | 105,22 | 80,6       |
| chr9 | 123215677 | 123216120 | CDK5RAP2 | NM_018249 | 38 | 38 | 21  | 418   | 1998 | 96087  | 216,41 | 92,6       |

|      |           |           |          |           |    |    |       |         |      |       |        |            |
|------|-----------|-----------|----------|-----------|----|----|-------|---------|------|-------|--------|------------|
| chr9 | 123220779 | 123220973 | CDK5RAP2 | NM_018249 | 38 | 38 | 20    | 173     | 887  | 39169 | 200,87 | 70,5       |
| chr9 | 123222794 | 123223003 | CDK5RAP2 | NM_018249 | 38 | 38 | 19    | 96      | 803  | 36409 | 173,38 | 100        |
| chr9 | 123230058 | 123230243 | CDK5RAP2 | NM_018249 | 38 | 38 | 18    | 138     | 470  | 20476 | 110,09 | 76,8       |
| chr9 | 123232418 | 123232588 | CDK5RAP2 | NM_018249 | 38 | 38 | 17    | 110     | 110  | 4738  | 27,71  | 73,6       |
| chr9 | 123234065 | 123234235 | CDK5RAP2 | NM_018249 | 38 | 38 | 16    | 131     | 235  | 9642  | 56,39  | 70,2       |
| chr9 | 123239637 | 123239849 | CDK5RAP2 | NM_018249 | 38 | 38 | 15    | 101     | 220  | 9704  | 45,56  | 91,1       |
| chr9 | 123249516 | 123249716 | CDK5RAP2 | NM_018249 | 38 | 38 | 14    | 144     | 642  | 27593 | 137,28 | 100        |
| chr9 | 123253569 | 123253766 | CDK5RAP2 | NM_018249 | 38 | 38 | 13    | 171     | 299  | 14054 | 70,98  | 100        |
| chr9 | 123280742 | 123281028 | CDK5RAP2 | NM_018249 | 38 | 38 | 12    | 219     | 1559 | 72682 | 253,25 | 83,1       |
| chr9 | 123287254 | 123287442 | CDK5RAP2 | NM_018249 | 38 | 38 | 11    | 93      | 398  | 16707 | 88,4   | 100        |
| chr9 | 123290016 | 123290210 | CDK5RAP2 | NM_018249 | 38 | 38 | 10    | 120     | 169  | 6916  | 35,47  | 100        |
| chr9 | 123290876 | 123291088 | CDK5RAP2 | NM_018249 | 38 | 38 | 9     | 54      | 295  | 12471 | 58,55  | 100        |
| chr9 | 123292311 | 123292499 | CDK5RAP2 | NM_018249 | 38 | 38 | 8     | 163     | 39   | 1681  | 8,89   | 66,3       |
| chr9 | 123298701 | 123298984 | CDK5RAP2 | NM_018249 | 38 | 38 | 7     | 155     | 879  | 38730 | 136,37 | 67,1       |
| chr9 | 123301204 | 123301404 | CDK5RAP2 | NM_018249 | 38 | 38 | 6     | 124     | 109  | 4882  | 24,29  | 69,4       |
| chr9 | 123307992 | 123308204 | CDK5RAP2 | NM_018249 | 38 | 38 | 5     | 77      | 208  | 8320  | 39,06  | 100        |
| chr9 | 123313000 | 123313203 | CDK5RAP2 | NM_018249 | 38 | 38 | 4     | 111     | 628  | 27503 | 134,82 | 100        |
| chr9 | 123330574 | 123330762 | CDK5RAP2 | NM_018249 | 38 | 38 | 3     | 68      | 96   | 4318  | 22,85  | 100        |
| chr9 | 123334170 | 123334397 | CDK5RAP2 | NM_018249 | 38 | 38 | 2     | 68      | 994  | 43397 | 190,34 | 100        |
| chr9 | 123342205 | 123342420 | CDK5RAP2 | NM_018249 | 38 | 38 | 1     | 59      | 48   | 2006  | 9,29   | 88,1       |
| chr9 | 130374607 | 130374786 | STXBP1   | NM_003165 | 20 | 19 | 1     | 37      | 6    | 300   | 1,67   | 100        |
| chr9 | 130413812 | 130413991 | STXBP1   | NM_003165 | 20 | 19 | 2     | 50      | 74   | 3268  | 18,16  | 100        |
| chr9 | 130415868 | 130416062 | STXBP1   | NM_003165 | 20 | 19 | 3     | 82      | 210  | 8687  | 44,55  | 84,1       |
| chr9 | 130420537 | 130420719 | STXBP1   | NM_003165 | 20 | 19 | 4     | 77      | 199  | 8619  | 47,1   | 85,7       |
| chr9 | 130422172 | 130422387 | STXBP1   | NM_003165 | 20 | 19 | 5     | 79      | 651  | 28602 | 132,42 | 100        |
| chr9 | 130423269 | 130423469 | STXBP1   | NM_003165 | 20 | 19 | 6     | 104     | 519  | 23114 | 115    | 85,6       |
| chr9 | 130425400 | 130425582 | STXBP1   | NM_003165 | 20 | 19 | 7     | 149     | 897  | 39941 | 218,26 | 66,4       |
| chr9 | 130427497 | 130427694 | STXBP1   | NM_003165 | 20 | 19 | 8     | 85      | 1051 | 46458 | 234,64 | 100        |
| chr9 | 130428451 | 130428639 | STXBP1   | NM_003165 | 20 | 19 | 9     | 131     | 843  | 37931 | 200,69 | 95,4       |
| chr9 | 130430246 | 130430437 | STXBP1   | NM_003165 | 20 | 19 | 10    | 108     | 415  | 17276 | 89,98  | 73,1       |
| chr9 | 130432037 | 130432231 | STXBP1   | NM_003165 | 20 | 19 | 11    | 61      | 1074 | 49403 | 253,35 | 90,2       |
| chr9 | 130434307 | 130434495 | STXBP1   | NM_003165 | 20 | 19 | 12    | 66      | 840  | 37258 | 197,13 | 100        |
| chr9 | 130435327 | 130435524 | STXBP1   | NM_003165 | 20 | 19 | 13    | 81      | 1469 | 63401 | 320,21 | 80,2       |
| chr9 | 130438111 | 130438317 | STXBP1   | NM_003165 | 20 | 19 | 14    | 139     | 114  | 4890  | 23,62  | 79,9       |
| chr9 | 130438934 | 130439149 | STXBP1   | NM_003165 | 20 | 19 | 15    | 110     | 662  | 28468 | 131,8  | 90         |
| chr9 | 130440588 | 130440815 | STXBP1   | NM_003165 | 20 | 19 | 16    | 102     | 275  | 11918 | 52,27  | 100        |
| chr9 | 130442333 | 130442503 | STXBP1   | NM_003165 | 20 | 19 | 17    | 86      | 530  | 21799 | 127,48 | 79,1       |
| chr9 | 130444592 | 130444786 | STXBP1   | NM_003165 | 20 | 19 | 18    | 155     | 780  | 33556 | 172,08 | 65,8       |
| chr9 | 130446647 | 130446835 | STXBP1   | NM_003165 | 20 | 19 | 19    | 110     | 260  | 11674 | 61,77  | 100        |
| chr9 | 130453023 | 130453217 | STXBP1   | NM_003165 | 20 | 19 | 20    | 1942    | 109  | 4610  | 23,64  | 8,4        |
| chr9 | 130630105 | 130630329 | AK1      | NM_000476 | 7  | 6  | 7     | 69      | 173  | 7480  | 33,24  | 62,3       |
| chr9 | 130630607 | 130630792 | AK1      | NM_000476 | 7  | 6  | 6     | 192     | 167  | 7239  | 38,92  | 96,4       |
| chr9 | 130634068 | 130634259 | AK1      | NM_000476 | 7  | 6  | 5     | 117     | 553  | 23593 | 122,88 | 100        |
| chr9 | 130634989 | 130635376 | AK1      | NM_000476 | 7  | 6  | 4,3   | 164,36  | 316  | 14750 | 38,02  | 87,8,100.0 |
| chr9 | 130636831 | 130637040 | AK1      | NM_000476 | 7  | 6  | 2     | 7       | 127  | 5369  | 25,57  | 100        |
| chr9 | 133884522 | 133885042 | LAMC3    | NM_006059 | 28 | 28 | 1     | 373     | 117  | 5339  | 10,25  | 100        |
| chr9 | 133901598 | 133901982 | LAMC3    | NM_006059 | 28 | 28 | 2     | 305     | 537  | 25236 | 65,55  | 100        |
| chr9 | 133907378 | 133907554 | LAMC3    | NM_006059 | 28 | 28 | 3     | 131     | 1230 | 52150 | 294,63 | 93,9       |
| chr9 | 133911463 | 133911663 | LAMC3    | NM_006059 | 28 | 28 | 4     | 167     | 77   | 3150  | 15,67  | 66,5       |
| chr9 | 133914183 | 133914623 | LAMC3    | NM_006059 | 28 | 28 | 5,6   | 189,118 | 688  | 32680 | 74,1   | 100.0,89.8 |
| chr9 | 133916918 | 133917100 | LAMC3    | NM_006059 | 28 | 28 | 7     | 99      | 566  | 24973 | 136,46 | 77,8       |
| chr9 | 133920941 | 133921138 | LAMC3    | NM_006059 | 28 | 28 | 8     | 137     | 484  | 20510 | 103,59 | 78,1       |
| chr9 | 133924412 | 133924636 | LAMC3    | NM_006059 | 28 | 28 | 9     | 111     | 375  | 15186 | 67,49  | 95,5       |
| chr9 | 133927791 | 133928314 | LAMC3    | NM_006059 | 28 | 28 | 10,11 | 193,116 | 680  | 31027 | 59,21  | 100.0,67.2 |
| chr9 | 133932209 | 133932504 | LAMC3    | NM_006059 | 28 | 28 | 12    | 219     | 293  | 13723 | 46,36  | 86,3       |
| chr9 | 133936367 | 133936543 | LAMC3    | NM_006059 | 28 | 28 | 13    | 189     | 336  | 13675 | 77,26  | 64,6       |
| chr9 | 133942266 | 133942552 | LAMC3    | NM_006059 | 28 | 28 | 14    | 246     | 388  | 17748 | 61,84  | 83,7       |

|      |           |           |       |           |    |    |       |            |      |        |        |                  |
|------|-----------|-----------|-------|-----------|----|----|-------|------------|------|--------|--------|------------------|
| chr9 | 133943381 | 133943581 | LAMC3 | NM_006059 | 28 | 28 | 15    | 154        | 258  | 10296  | 51,22  | 76               |
| chr9 | 133944256 | 133944456 | LAMC3 | NM_006059 | 28 | 28 | 16    | 143        | 205  | 8307   | 41,33  | 100              |
| chr9 | 133945092 | 133945280 | LAMC3 | NM_006059 | 28 | 28 | 17    | 179        | 204  | 8243   | 43,61  | 81,6             |
| chr9 | 133946781 | 133946969 | LAMC3 | NM_006059 | 28 | 28 | 18    | 142        | 286  | 12430  | 65,77  | 69,7             |
| chr9 | 133948094 | 133948276 | LAMC3 | NM_006059 | 28 | 28 | 19    | 206        | 292  | 12466  | 68,12  | 62,6             |
| chr9 | 133948509 | 133948697 | LAMC3 | NM_006059 | 28 | 28 | 20    | 77         | 405  | 17442  | 92,29  | 85,7             |
| chr9 | 133951136 | 133951309 | LAMC3 | NM_006059 | 28 | 28 | 21    | 135        | 139  | 5478   | 31,48  | 68,1             |
| chr9 | 133952562 | 133952741 | LAMC3 | NM_006059 | 28 | 28 | 22    | 148        | 121  | 4929   | 27,38  | 100              |
| chr9 | 133954585 | 133954785 | LAMC3 | NM_006059 | 28 | 28 | 23    | 150        | 605  | 27565  | 137,14 | 67,3             |
| chr9 | 133957468 | 133957671 | LAMC3 | NM_006059 | 28 | 28 | 24    | 103        | 237  | 9544   | 46,78  | 78,6             |
| chr9 | 133960904 | 133961104 | LAMC3 | NM_006059 | 28 | 28 | 25    | 200        | 134  | 5443   | 27,08  | 97               |
| chr9 | 133962916 | 133963270 | LAMC3 | NM_006059 | 28 | 28 | 26,27 | 147.100    | 720  | 33855  | 95,37  | 63.9,100.0       |
| chr9 | 133966933 | 133967290 | LAMC3 | NM_006059 | 28 | 28 | 28    | 251        | 284  | 13335  | 37,25  | 96,4             |
| chr9 | 134379597 | 134379821 | POMT1 | NM_007171 | 20 | 19 | 2     | 122        | 119  | 4794   | 21,31  | 100              |
| chr9 | 134381481 | 134381844 | POMT1 | NM_007171 | 20 | 19 | 3,4   | 107,51     | 731  | 34481  | 94,73  | 100.0,100.0      |
| chr9 | 134382648 | 134382866 | POMT1 | NM_007171 | 20 | 19 | 5     | 147        | 296  | 12059  | 55,06  | 76,2             |
| chr9 | 134384313 | 134384525 | POMT1 | NM_007171 | 20 | 19 | 6     | 112        | 671  | 30044  | 141,05 | 86,6             |
| chr9 | 134385050 | 134385745 | POMT1 | NM_007171 | 20 | 19 | 7,8,9 | 66.160.156 | 2908 | 136457 | 196,06 | 100.0,100.0,63.5 |
| chr9 | 134386765 | 134386935 | POMT1 | NM_007171 | 20 | 19 | 10    | 131        | 185  | 7464   | 43,65  | 68,7             |
| chr9 | 134387398 | 134387592 | POMT1 | NM_007171 | 20 | 19 | 11    | 96         | 442  | 18187  | 93,27  | 100              |
| chr9 | 134388508 | 134388726 | POMT1 | NM_007171 | 20 | 19 | 12    | 93         | 96   | 4297   | 19,62  | 100              |
| chr9 | 134390703 | 134390885 | POMT1 | NM_007171 | 20 | 19 | 13    | 97         | 708  | 30047  | 164,19 | 75,3             |
| chr9 | 134393520 | 134394283 | POMT1 | NM_007171 | 20 | 19 | 14,15 | 93.121     | 1564 | 75319  | 98,59  | 100.0,49.6       |
| chr9 | 134394655 | 134394852 | POMT1 | NM_007171 | 20 | 19 | 16    | 98         | 739  | 31557  | 159,38 | 78,6             |
| chr9 | 134395438 | 134395653 | POMT1 | NM_007171 | 20 | 19 | 17    | 114        | 1076 | 45427  | 210,31 | 100              |
| chr9 | 134396620 | 134396826 | POMT1 | NM_007171 | 20 | 19 | 18    | 127        | 1772 | 79929  | 386,13 | 74               |
| chr9 | 134397422 | 134397607 | POMT1 | NM_007171 | 20 | 19 | 19    | 178        | 1408 | 59377  | 319,23 | 97,8             |
| chr9 | 134398269 | 134398608 | POMT1 | NM_007171 | 20 | 19 | 20    | 175        | 541  | 26374  | 77,57  | 100              |
| chr9 | 135771549 | 135772084 | TSC1  | NM_000368 | 23 | 21 | 23    | 520        | 2700 | 126178 | 235,41 | 89               |
| chr9 | 135772584 | 135773024 | TSC1  | NM_000368 | 23 | 21 | 22,21 | 162.188    | 1031 | 49444  | 112,12 | 92.0,100.0       |
| chr9 | 135776134 | 135776325 | TSC1  | NM_000368 | 23 | 21 | 20    | 123        | 543  | 22690  | 118,18 | 74               |
| chr9 | 135776867 | 135777067 | TSC1  | NM_000368 | 23 | 21 | 19    | 111        | 1477 | 62178  | 309,34 | 82,9             |
| chr9 | 135778057 | 135778251 | TSC1  | NM_000368 | 23 | 21 | 18    | 183        | 592  | 24065  | 123,41 | 64,5             |
| chr9 | 135779095 | 135779295 | TSC1  | NM_000368 | 23 | 21 | 17    | 167        | 110  | 4988   | 24,82  | 65,9             |
| chr9 | 135779779 | 135779991 | TSC1  | NM_000368 | 23 | 21 | 16    | 44         | 237  | 10156  | 47,68  | 100              |
| chr9 | 135780874 | 135781477 | TSC1  | NM_000368 | 23 | 21 | 15    | 559        | 1494 | 71561  | 118,48 | 91,2             |
| chr9 | 135782093 | 135782299 | TSC1  | NM_000368 | 23 | 21 | 14    | 105        | 190  | 8546   | 41,29  | 100              |
| chr9 | 135782622 | 135782816 | TSC1  | NM_000368 | 23 | 21 | 13    | 70         | 424  | 17671  | 90,62  | 100              |
| chr9 | 135785780 | 135786048 | TSC1  | NM_000368 | 23 | 21 | 12    | 122        | 462  | 21416  | 79,61  | 74,6             |
| chr9 | 135786308 | 135786606 | TSC1  | NM_000368 | 23 | 21 | 11    | 112        | 571  | 25197  | 84,27  | 100              |
| chr9 | 135786696 | 135786917 | TSC1  | NM_000368 | 23 | 21 | 10    | 116        | 199  | 8020   | 36,13  | 67,2             |
| chr9 | 135787653 | 135787871 | TSC1  | NM_000368 | 23 | 21 | 9     | 176        | 236  | 9909   | 45,25  | 100              |
| chr9 | 135796686 | 135796883 | TSC1  | NM_000368 | 23 | 21 | 8     | 74         | 378  | 16365  | 82,65  | 100              |
| chr9 | 135797116 | 135797316 | TSC1  | NM_000368 | 23 | 21 | 7     | 155        | 187  | 8081   | 40,2   | 71,6             |
| chr9 | 135798634 | 135798837 | TSC1  | NM_000368 | 23 | 21 | 6     | 145        | 223  | 9518   | 46,66  | 71               |
| chr9 | 135800964 | 135801191 | TSC1  | NM_000368 | 23 | 21 | 5     | 153        | 443  | 17918  | 78,59  | 100              |
| chr9 | 135802539 | 135802754 | TSC1  | NM_000368 | 23 | 21 | 4     | 104        | 177  | 7949   | 36,8   | 100              |
| chr9 | 135804085 | 135804273 | TSC1  | NM_000368 | 23 | 21 | 3     | 106        | 744  | 32139  | 170,05 | 100              |
| chr9 | 136218684 | 136218964 | SURF1 | NM_003172 | 9  | 9  | 9,8   | 70,82      | 779  | 34517  | 122,84 | 100.0,59.8       |
| chr9 | 136219349 | 136219685 | SURF1 | NM_003172 | 9  | 9  | 7,6   | 163,73     | 685  | 30638  | 90,91  | 70.6,100.0       |
| chr9 | 136220674 | 136220853 | SURF1 | NM_003172 | 9  | 9  | 5     | 192        | 837  | 36751  | 204,17 | 63,5             |
| chr9 | 136221467 | 136221848 | SURF1 | NM_003172 | 9  | 9  | 4,3   | 83.134     | 787  | 35916  | 94,02  | 100.0,100.0      |
| chr9 | 136223165 | 136223617 | SURF1 | NM_003172 | 9  | 9  | 2,1   | 52,54      | 1    | 26     | 0,06   | 21.2,100.0       |
| chr9 | 138593957 | 138594148 | KCNT1 | NM_020822 | 31 | 31 | 1     | 110        | 14   | 503    | 2,62   | 40               |
| chr9 | 138606367 | 138606632 | KCNT1 | NM_020822 | 31 | 31 | 2     | 144        | 14   | 657    | 2,47   | 100              |
| chr9 | 138641895 | 138642071 | KCNT1 | NM_020822 | 31 | 31 | 3     | 80         | 164  | 7257   | 41     | 100              |
| chr9 | 138642722 | 138642898 | KCNT1 | NM_020822 | 31 | 31 | 4     | 100        | 76   | 3376   | 19,07  | 100              |

|      |           |           |        |              |    |    |       |         |      |       |        |             |
|------|-----------|-----------|--------|--------------|----|----|-------|---------|------|-------|--------|-------------|
| chr9 | 138645635 | 138645838 | KCNT1  | NM_020822    | 31 | 31 | 5     | 57      | 95   | 3723  | 18,25  | 98,2        |
| chr9 | 138646884 | 138647093 | KCNT1  | NM_020822    | 31 | 31 | 6     | 49      | 240  | 10628 | 50,61  | 100         |
| chr9 | 138648660 | 138648839 | KCNT1  | NM_020822    | 31 | 31 | 7     | 60      | 85   | 3526  | 19,59  | 100         |
| chr9 | 138648959 | 138649230 | KCNT1  | NM_020822    | 31 | 31 | 8,9   | 75,84   | 354  | 17238 | 63,38  | 100.0,100.0 |
| chr9 | 138650173 | 138650361 | KCNT1  | NM_020822    | 31 | 31 | 10    | 95      | 537  | 22652 | 119,85 | 100         |
| chr9 | 138651523 | 138651702 | KCNT1  | NM_020822    | 31 | 31 | 11    | 181     | 132  | 5800  | 32,22  | 98,3        |
| chr9 | 138656855 | 138657043 | KCNT1  | NM_020822    | 31 | 31 | 12    | 165     | 640  | 27207 | 143,95 | 100         |
| chr9 | 138657467 | 138657676 | KCNT1  | NM_020822    | 31 | 31 | 13    | 137     | 72   | 3257  | 15,51  | 100         |
| chr9 | 138660484 | 138660859 | KCNT1  | NM_020822    | 31 | 31 | 14,15 | 64.109  | 149  | 6819  | 18,14  | 56.2,100.0  |
| chr9 | 138661704 | 138661910 | KCNT1  | NM_020822    | 31 | 31 | 16    | 109     | 12   | 509   | 2,46   | 100         |
| chr9 | 138662133 | 138662318 | KCNT1  | NM_020822    | 31 | 31 | 17    | 150     | 134  | 5628  | 30,26  | 100         |
| chr9 | 138662624 | 138662895 | KCNT1  | NM_020822    | 31 | 31 | 18    | 239     | 163  | 7559  | 27,79  | 80,8        |
| chr9 | 138664534 | 138664814 | KCNT1  | NM_020822    | 31 | 31 | 19    | 235     | 48   | 2069  | 7,36   | 100         |
| chr9 | 138667156 | 138667377 | KCNT1  | NM_020822    | 31 | 31 | 20    | 106     | 161  | 7347  | 33,09  | 100         |
| chr9 | 138669124 | 138669309 | KCNT1  | NM_020822    | 31 | 31 | 21    | 173     | 418  | 18609 | 100,05 | 72,8        |
| chr9 | 138670220 | 138670408 | KCNT1  | NM_020822    | 31 | 31 | 22    | 72      | 48   | 1922  | 10,17  | 100         |
| chr9 | 138670455 | 138670670 | KCNT1  | NM_020822    | 31 | 31 | 23    | 135     | 119  | 5025  | 23,26  | 100         |
| chr9 | 138671202 | 138671378 | KCNT1  | NM_020822    | 31 | 31 | 24    | 112     | 122  | 5068  | 28,63  | 100         |
| chr9 | 138675856 | 138676062 | KCNT1  | NM_020822    | 31 | 31 | 25    | 102     | 432  | 18649 | 90,09  | 100         |
| chr9 | 138676365 | 138676725 | KCNT1  | NM_020822    | 31 | 31 | 26,27 | 84.129  | 94   | 4259  | 11,8   | 100.0,92.2  |
| chr9 | 138677123 | 138677323 | KCNT1  | NM_020822    | 31 | 31 | 28    | 21      | 20   | 869   | 4,32   | 100         |
| chr9 | 138678069 | 138678441 | KCNT1  | NM_020822    | 31 | 31 | 29    | 325     | 49   | 2191  | 5,87   | 92          |
| chr9 | 138683634 | 138684080 | KCNT1  | NM_020822    | 31 | 31 | 30,31 | 85.121  | 416  | 18839 | 42,15  | 100.0,100.0 |
| chr9 | 139324037 | 139324240 | INPP5E | NM_019892    | 10 | 10 | 10    | 133     | 731  | 32712 | 160,35 | 85,7        |
| chr9 | 139324720 | 139324911 | INPP5E | NM_019892    | 10 | 10 | 9     | 137     | 191  | 8755  | 45,6   | 100         |
| chr9 | 139325417 | 139325611 | INPP5E | NM_019892    | 10 | 10 | 8     | 116     | 414  | 18834 | 96,58  | 100         |
| chr9 | 139326301 | 139326495 | INPP5E | NM_019892    | 10 | 10 | 7     | 162     | 100  | 4201  | 21,54  | 84,6        |
| chr9 | 139326926 | 139327105 | INPP5E | NM_019892    | 10 | 10 | 6     | 108     | 25   | 969   | 5,38   | 100         |
| chr9 | 139327344 | 139327689 | INPP5E | NM_019892    | 10 | 10 | 5,4   | 120.125 | 303  | 13018 | 37,62  | 100.0,66.4  |
| chr9 | 139328485 | 139328700 | INPP5E | NM_019892    | 10 | 10 | 3     | 98      | 91   | 3911  | 18,11  | 100         |
| chr9 | 139329201 | 139329422 | INPP5E | NM_019892    | 10 | 10 | 2     | 124     | 32   | 1336  | 6,02   | 92,7        |
| chr9 | 139332991 | 139333970 | INPP5E | NM_019892    | 10 | 10 | 1     | 812     | 72   | 2810  | 2,87   | 100         |
| chr9 | 139568156 | 139568362 | AGPAT2 | NM_006412    | 6  | 6  | 6     | 176     | 8    | 346   | 1,67   | 90,3        |
| chr9 | 139569134 | 139569307 | AGPAT2 | NM_006412    | 6  | 6  | 5     | 73      | 40   | 1724  | 9,91   | 100         |
| chr9 | 139571026 | 139571211 | AGPAT2 | NM_006412    | 6  | 6  | 4     | 96      | 25   | 1009  | 5,42   | 100         |
| chr9 | 139571400 | 139571600 | AGPAT2 | NM_006412    | 6  | 6  | 3     | 176     | 295  | 12385 | 61,62  | 100         |
| chr9 | 139571871 | 139572071 | AGPAT2 | NM_006412    | 6  | 6  | 2     | 134     | 96   | 4222  | 21     | 100         |
| chr9 | 139581544 | 139581815 | AGPAT2 | NM_006412    | 6  | 6  | 1     | 182     | 18   | 733   | 2,69   | 100         |
| chr9 | 139981380 | 139981648 | MAN1B1 | NM_016219    | 13 | 13 | 1     | 219     | 90   | 3798  | 14,12  | 90          |
| chr9 | 139982420 | 139982605 | MAN1B1 | NM_016219    | 13 | 13 | 2     | 109     | 706  | 30506 | 164,01 | 72,5        |
| chr9 | 139983240 | 139983413 | MAN1B1 | NM_016219    | 13 | 13 | 3     | 137     | 91   | 3600  | 20,69  | 67,9        |
| chr9 | 139990617 | 139990793 | MAN1B1 | NM_016219    | 13 | 13 | 4     | 155     | 225  | 10100 | 57,06  | 67,7        |
| chr9 | 139992219 | 139992413 | MAN1B1 | NM_016219    | 13 | 13 | 5     | 110     | 111  | 4709  | 24,15  | 100         |
| chr9 | 139994125 | 139994295 | MAN1B1 | NM_016219    | 13 | 13 | 6     | 186     | 782  | 32011 | 187,2  | 79,6        |
| chr9 | 139995382 | 139995555 | MAN1B1 | NM_016219    | 13 | 13 | 7     | 149     | 248  | 10709 | 61,55  | 66,4        |
| chr9 | 139995838 | 139996281 | MAN1B1 | NM_016219    | 13 | 13 | 8     | 189     | 1632 | 75461 | 169,96 | 100         |
| chr9 | 140000216 | 140000733 | MAN1B1 | NM_016219    | 13 | 13 | 9     | 191     | 465  | 21625 | 41,75  | 82,2        |
| chr9 | 140001151 | 140001366 | MAN1B1 | NM_016219    | 13 | 13 | 10    | 121     | 126  | 5156  | 23,87  | 91,7        |
| chr9 | 140001744 | 140002519 | MAN1B1 | NM_016219    | 13 | 13 | 11,12 | 198.132 | 711  | 32242 | 41,55  | 78.8,100.0  |
| chr9 | 140002802 | 140003144 | MAN1B1 | NM_016219    | 13 | 13 | 13    | 204     | 912  | 44162 | 128,75 | 100         |
| chr9 | 140033851 | 140034276 | GRIN1  | NM_001185090 | 21 | 21 | 1     | 258     | 370  | 17364 | 40,76  | 100         |
| chr9 | 140036371 | 140036556 | GRIN1  | NM_001185090 | 21 | 21 | 2     | 135     | 1335 | 52757 | 283,64 | 68,1        |
| chr9 | 140040174 | 140040356 | GRIN1  | NM_001185090 | 21 | 21 | 3     | 177     | 113  | 4668  | 25,51  | 100         |
| chr9 | 140042501 | 140042689 | GRIN1  | NM_001185090 | 21 | 21 | 4     | 63      | 154  | 6669  | 35,29  | 100         |
| chr9 | 140043437 | 140043643 | GRIN1  | NM_001185090 | 21 | 21 | 5     | 101     | 127  | 5070  | 24,49  | 100         |
| chr9 | 140051073 | 140051430 | GRIN1  | NM_001185090 | 21 | 21 | 6,7   | 122.175 | 71   | 3161  | 8,83   | 100.0,66.3  |
| chr9 | 140052765 | 140053122 | GRIN1  | NM_001185090 | 21 | 21 | 8,9   | 145,84  | 218  | 9569  | 26,73  | 100.0,59.5  |

|       |           |           |        |              |    |    |                   |                         |      |       |        |                              |
|-------|-----------|-----------|--------|--------------|----|----|-------------------|-------------------------|------|-------|--------|------------------------------|
| chr9  | 140055504 | 140055864 | GRIN1  | NM_001185090 | 21 | 21 | 10,11             | 142.128                 | 106  | 4394  | 12,17  | 100,0,96,9                   |
| chr9  | 140056354 | 140057745 | GRIN1  | NM_001185090 | 21 | 21 | 12,13,14,15,16,17 | 165.119.113.149.158.000 | 623  | 29466 | 21,17  | 100,0,100,0,100,0,100,0,77,2 |
| chr9  | 140057953 | 140058624 | GRIN1  | NM_001185090 | 21 | 21 | 18,19             | 110.146                 | 399  | 19131 | 28,47  | 100,0,100,0                  |
| chr9  | 140059556 | 140059806 | GRIN1  | NM_001185090 | 21 | 21 | 20                | 111                     | 623  | 28610 | 113,98 | 100                          |
| chr9  | 140061838 | 140062441 | GRIN1  | NM_001185090 | 21 | 21 | 21                | 69                      | 89   | 4010  | 6,64   | 100                          |
| chr9  | 140513309 | 140513503 | EHMT1  | NM_024757    | 27 | 27 | 1                 | 21                      | 0    | 0     | 0      | 100                          |
| chr9  | 140605289 | 140605474 | EHMT1  | NM_024757    | 27 | 27 | 2                 | 64                      | 339  | 13548 | 72,84  | 87,5                         |
| chr9  | 140611110 | 140611731 | EHMT1  | NM_024757    | 27 | 27 | 3                 | 557                     | 1221 | 57559 | 92,54  | 94,3                         |
| chr9  | 140622727 | 140622930 | EHMT1  | NM_024757    | 27 | 27 | 4                 | 181                     | 107  | 4497  | 22,04  | 71,8                         |
| chr9  | 140637816 | 140638004 | EHMT1  | NM_024757    | 27 | 27 | 5                 | 158                     | 83   | 3671  | 19,42  | 100                          |
| chr9  | 140638407 | 140638616 | EHMT1  | NM_024757    | 27 | 27 | 6                 | 189                     | 199  | 7057  | 33,6   | 72                           |
| chr9  | 140646667 | 140646846 | EHMT1  | NM_024757    | 27 | 27 | 7                 | 78                      | 526  | 23632 | 131,29 | 82,1                         |
| chr9  | 140648531 | 140648707 | EHMT1  | NM_024757    | 27 | 27 | 8                 | 121                     | 184  | 8111  | 45,82  | 70,2                         |
| chr9  | 140652342 | 140652515 | EHMT1  | NM_024757    | 27 | 27 | 9                 | 132                     | 1208 | 51672 | 296,97 | 92,4                         |
| chr9  | 140657036 | 140657227 | EHMT1  | NM_024757    | 27 | 27 | 10                | 146                     | 416  | 17568 | 91,5   | 69,2                         |
| chr9  | 140669496 | 140669702 | EHMT1  | NM_024757    | 27 | 27 | 11                | 144                     | 61   | 2588  | 12,5   | 98,6                         |
| chr9  | 140670982 | 140671259 | EHMT1  | NM_024757    | 27 | 27 | 12                | 227                     | 461  | 20996 | 75,53  | 83,7                         |
| chr9  | 140672395 | 140672583 | EHMT1  | NM_024757    | 27 | 27 | 13                | 174                     | 957  | 36371 | 192,44 | 64,9                         |
| chr9  | 140674060 | 140674257 | EHMT1  | NM_024757    | 27 | 27 | 14                | 83                      | 495  | 21384 | 108    | 100                          |
| chr9  | 140676650 | 140676823 | EHMT1  | NM_024757    | 27 | 27 | 15                | 107                     | 458  | 19294 | 110,89 | 75,7                         |
| chr9  | 140685281 | 140685481 | EHMT1  | NM_024757    | 27 | 27 | 16                | 123                     | 517  | 22654 | 112,71 | 100                          |
| chr9  | 140693221 | 140693430 | EHMT1  | NM_024757    | 27 | 27 | 17                | 102                     | 632  | 25628 | 122,04 | 100                          |
| chr9  | 140695328 | 140695522 | EHMT1  | NM_024757    | 27 | 27 | 18                | 105                     | 474  | 20208 | 103,63 | 100                          |
| chr9  | 140705826 | 140706017 | EHMT1  | NM_024757    | 27 | 27 | 19                | 155                     | 70   | 2909  | 15,15  | 67,7                         |
| chr9  | 140707393 | 140707572 | EHMT1  | NM_024757    | 27 | 27 | 20                | 168                     | 151  | 6341  | 35,23  | 68,5                         |
| chr9  | 140707878 | 140708069 | EHMT1  | NM_024757    | 27 | 27 | 21                | 145                     | 232  | 9660  | 50,31  | 72,4                         |
| chr9  | 140708764 | 140708964 | EHMT1  | NM_024757    | 27 | 27 | 22                | 78                      | 2037 | 85801 | 426,87 | 100                          |
| chr9  | 140710281 | 140710505 | EHMT1  | NM_024757    | 27 | 27 | 23                | 116                     | 281  | 12066 | 53,63  | 92,2                         |
| chr9  | 140711767 | 140711985 | EHMT1  | NM_024757    | 27 | 27 | 24                | 87                      | 432  | 19333 | 88,28  | 100                          |
| chr9  | 140712527 | 140712703 | EHMT1  | NM_024757    | 27 | 27 | 25                | 79                      | 413  | 17185 | 97,09  | 81                           |
| chr9  | 140728761 | 140728958 | EHMT1  | NM_024757    | 27 | 27 | 26                | 176                     | 144  | 6552  | 33,09  | 89,8                         |
| chr9  | 140729244 | 140729471 | EHMT1  | NM_024757    | 27 | 27 | 27                | 181                     | 16   | 576   | 2,53   | 89,5                         |
| chr10 | 12110949  | 12111143  | DHTKD1 | NM_018706    | 17 | 17 | 1                 | 154                     | 55   | 2455  | 12,59  | 72,1                         |
| chr10 | 12123379  | 12123582  | DHTKD1 | NM_018706    | 17 | 17 | 2                 | 156                     | 1084 | 47346 | 232,09 | 71,8                         |
| chr10 | 12126520  | 12126702  | DHTKD1 | NM_018706    | 17 | 17 | 3                 | 212                     | 215  | 8776  | 47,96  | 77,4                         |
| chr10 | 12129593  | 12129799  | DHTKD1 | NM_018706    | 17 | 17 | 4                 | 195                     | 382  | 17687 | 85,44  | 69,7                         |
| chr10 | 12130925  | 12131214  | DHTKD1 | NM_018706    | 17 | 17 | 5                 | 270                     | 1073 | 50660 | 174,69 | 85,2                         |
| chr10 | 12133500  | 12133691  | DHTKD1 | NM_018706    | 17 | 17 | 6                 | 172                     | 97   | 4088  | 21,29  | 100                          |
| chr10 | 12136008  | 12136297  | DHTKD1 | NM_018706    | 17 | 17 | 7                 | 199                     | 546  | 24004 | 82,77  | 100                          |
| chr10 | 12139604  | 12139973  | DHTKD1 | NM_018706    | 17 | 17 | 8                 | 313                     | 989  | 45141 | 122    | 93                           |
| chr10 | 12142070  | 12142258  | DHTKD1 | NM_018706    | 17 | 17 | 9                 | 85                      | 113  | 5164  | 27,32  | 96,5                         |
| chr10 | 12142998  | 12143210  | DHTKD1 | NM_018706    | 17 | 17 | 10                | 140                     | 603  | 25575 | 120,07 | 100                          |
| chr10 | 12148201  | 12148398  | DHTKD1 | NM_018706    | 17 | 17 | 11                | 151                     | 777  | 31532 | 159,25 | 100                          |
| chr10 | 12149935  | 12150132  | DHTKD1 | NM_018706    | 17 | 17 | 12                | 107                     | 517  | 21048 | 106,3  | 74,8                         |
| chr10 | 12154934  | 12155146  | DHTKD1 | NM_018706    | 17 | 17 | 13                | 165                     | 819  | 36900 | 173,24 | 78,8                         |
| chr10 | 12159657  | 12159839  | DHTKD1 | NM_018706    | 17 | 17 | 14                | 83                      | 214  | 9608  | 52,5   | 100                          |
| chr10 | 12160795  | 12160980  | DHTKD1 | NM_018706    | 17 | 17 | 15                | 170                     | 331  | 13526 | 72,72  | 72,4                         |
| chr10 | 12162069  | 12162257  | DHTKD1 | NM_018706    | 17 | 17 | 16                | 86                      | 591  | 25007 | 132,31 | 89,5                         |
| chr10 | 12162714  | 12162988  | DHTKD1 | NM_018706    | 17 | 17 | 17                | 102                     | 312  | 14121 | 51,35  | 100                          |
| chr10 | 26986639  | 26986842  | PDSS1  | NM_014317    | 12 | 12 | 1                 | 129                     | 1    | 32    | 0,16   | 100                          |
| chr10 | 26993471  | 26993692  | PDSS1  | NM_014317    | 12 | 12 | 3                 | 65                      | 158  | 6736  | 30,34  | 100                          |
| chr10 | 26994093  | 26994299  | PDSS1  | NM_014317    | 12 | 12 | 4                 | 109                     | 193  | 8351  | 40,34  | 78                           |
| chr10 | 26998606  | 26998779  | PDSS1  | NM_014317    | 12 | 12 | 5                 | 131                     | 307  | 12617 | 72,51  | 70,2                         |
| chr10 | 27009192  | 27009389  | PDSS1  | NM_014317    | 12 | 12 | 6                 | 142                     | 787  | 33169 | 167,52 | 68,3                         |
| chr10 | 27012732  | 27013101  | PDSS1  | NM_014317    | 12 | 12 | 7,8               | 112.110                 | 820  | 37956 | 102,58 | 100,0,100,0                  |
| chr10 | 27024230  | 27024593  | PDSS1  | NM_014317    | 12 | 12 | 9,10              | 81.114                  | 1416 | 64816 | 178,07 | 24,7,100,0                   |
| chr10 | 27031431  | 27031625  | PDSS1  | NM_014317    | 12 | 12 | 11                | 81                      | 79   | 3138  | 16,09  | 93,8                         |

|       |          |          |          |              |    |    |       |         |       |        |        |            |
|-------|----------|----------|----------|--------------|----|----|-------|---------|-------|--------|--------|------------|
| chr10 | 27035172 | 27035535 | PDSS1    | NM_014317    | 12 | 12 | 12    | 141     | 1535  | 72941  | 200,39 | 100        |
| chr10 | 27793209 | 27793569 | RAB18    | NM_001256410 | 8  | 8  | 1     | 68      | 128   | 6089   | 16,87  | 100        |
| chr10 | 27798806 | 27798997 | RAB18    | NM_001256410 | 8  | 8  | 2     | 56      | 380   | 16336  | 85,08  | 96,4       |
| chr10 | 27815699 | 27815985 | RAB18    | NM_001256410 | 8  | 8  | 3     | 62      | 142   | 6284   | 21,9   | 100        |
| chr10 | 27820361 | 27820558 | RAB18    | NM_001256410 | 8  | 8  | 4     | 87      | 89    | 3990   | 20,15  | 100        |
| chr10 | 27821377 | 27821559 | RAB18    | NM_001256410 | 8  | 8  | 5     | 73      | 113   | 4412   | 24,11  | 100        |
| chr10 | 27822713 | 27822981 | RAB18    | NM_001256410 | 8  | 8  | 6,7   | 119,67  | 732   | 31497  | 117,09 | 58,8,100.0 |
| chr10 | 27826825 | 27827102 | RAB18    | NM_001256410 | 8  | 8  | 8     | 176     | 483   | 22127  | 79,59  | 88,6       |
| chr10 | 50666731 | 50667272 | ERCC6    | NM_000124    | 21 | 20 | 21    | 420     | 1679  | 80616  | 148,74 | 98,1       |
| chr10 | 50668303 | 50668494 | ERCC6    | NM_000124    | 21 | 20 | 20    | 79      | 416   | 17765  | 92,53  | 96,2       |
| chr10 | 50669474 | 50669674 | ERCC6    | NM_000124    | 21 | 20 | 19    | 205     | 415   | 17985  | 89,48  | 62,9       |
| chr10 | 50678169 | 50679160 | ERCC6    | NM_000124    | 21 | 20 | 18,17 | 708.146 | 3993  | 187378 | 188,89 | 100,0,95.9 |
| chr10 | 50680302 | 50680505 | ERCC6    | NM_000124    | 21 | 20 | 16    | 95      | 354   | 15906  | 77,97  | 88,4       |
| chr10 | 50680857 | 50681039 | ERCC6    | NM_000124    | 21 | 20 | 15    | 120     | 227   | 9297   | 50,8   | 70,8       |
| chr10 | 50681510 | 50681707 | ERCC6    | NM_000124    | 21 | 20 | 14    | 111     | 444   | 19926  | 100,64 | 100        |
| chr10 | 50682103 | 50682371 | ERCC6    | NM_000124    | 21 | 20 | 13    | 216     | 410   | 18696  | 69,5   | 86,1       |
| chr10 | 50684178 | 50684381 | ERCC6    | NM_000124    | 21 | 20 | 12    | 96      | 265   | 12170  | 59,66  | 100        |
| chr10 | 50686330 | 50686530 | ERCC6    | NM_000124    | 21 | 20 | 11    | 117     | 1007  | 44809  | 222,93 | 100        |
| chr10 | 50690681 | 50690899 | ERCC6    | NM_000124    | 21 | 20 | 10    | 177     | 310   | 13695  | 62,53  | 94,4       |
| chr10 | 50691337 | 50691546 | ERCC6    | NM_000124    | 21 | 20 | 9     | 171     | 271   | 11082  | 52,77  | 90,6       |
| chr10 | 50701124 | 50701345 | ERCC6    | NM_000124    | 21 | 20 | 8     | 136     | 250   | 10745  | 48,4   | 100        |
| chr10 | 50708631 | 50708822 | ERCC6    | NM_000124    | 21 | 20 | 7     | 159     | 893   | 39976  | 208,21 | 70,4       |
| chr10 | 50713902 | 50714078 | ERCC6    | NM_000124    | 21 | 20 | 6     | 129     | 960   | 39099  | 220,9  | 100        |
| chr10 | 50732016 | 50732755 | ERCC6    | NM_000124    | 21 | 20 | 5     | 745     | 4488  | 210929 | 285,04 | 90,9       |
| chr10 | 50736425 | 50736604 | ERCC6    | NM_000124    | 21 | 20 | 4     | 109     | 1729  | 74157  | 411,98 | 100        |
| chr10 | 50738725 | 50738922 | ERCC6    | NM_000124    | 21 | 20 | 3     | 121     | 202   | 8848   | 44,69  | 100        |
| chr10 | 50740660 | 50741079 | ERCC6    | NM_000124    | 21 | 20 | 2     | 422     | 1224  | 56029  | 133,4  | 83,2       |
| chr10 | 70748508 | 70748963 | KIAA1279 | NM_015634    | 7  | 7  | 1     | 426     | 246   | 10969  | 24,05  | 88         |
| chr10 | 70760182 | 70760391 | KIAA1279 | NM_015634    | 7  | 7  | 2     | 99      | 520   | 21981  | 104,67 | 98         |
| chr10 | 70764711 | 70764905 | KIAA1279 | NM_015634    | 7  | 7  | 3     | 80      | 144   | 5903   | 30,27  | 100        |
| chr10 | 70765485 | 70765685 | KIAA1279 | NM_015634    | 7  | 7  | 4     | 184     | 254   | 11103  | 55,24  | 100        |
| chr10 | 70768523 | 70768711 | KIAA1279 | NM_015634    | 7  | 7  | 5     | 85      | 632   | 28112  | 148,74 | 100        |
| chr10 | 70770628 | 70770825 | KIAA1279 | NM_015634    | 7  | 7  | 6     | 116     | 286   | 11903  | 60,12  | 100        |
| chr10 | 70775297 | 70776306 | KIAA1279 | NM_015634    | 7  | 7  | 7     | 876     | 2460  | 120223 | 119,03 | 100        |
| chr10 | 76602532 | 76603203 | KAT6B    | NM_012330    | 18 | 16 | 3     | 621     | 1390  | 66427  | 98,85  | 94,7       |
| chr10 | 76719708 | 76719905 | KAT6B    | NM_012330    | 18 | 16 | 4     | 109     | 602   | 26292  | 132,79 | 100        |
| chr10 | 76729309 | 76729512 | KAT6B    | NM_012330    | 18 | 16 | 5     | 116     | 181   | 7289   | 35,73  | 81,9       |
| chr10 | 76729742 | 76729945 | KAT6B    | NM_012330    | 18 | 16 | 6     | 82      | 327   | 14546  | 71,3   | 100        |
| chr10 | 76732245 | 76732421 | KAT6B    | NM_012330    | 18 | 16 | 7     | 133     | 49    | 2052   | 11,59  | 100        |
| chr10 | 76735117 | 76736040 | KAT6B    | NM_012330    | 18 | 16 | 8     | 932     | 5233  | 254681 | 275,63 | 94,8       |
| chr10 | 76737085 | 76737291 | KAT6B    | NM_012330    | 18 | 16 | 9     | 122     | 289   | 13316  | 64,33  | 91         |
| chr10 | 76738951 | 76739142 | KAT6B    | NM_012330    | 18 | 16 | 10    | 116     | 178   | 7829   | 40,78  | 100        |
| chr10 | 76741545 | 76741736 | KAT6B    | NM_012330    | 18 | 16 | 11    | 142     | 265   | 11367  | 59,2   | 100        |
| chr10 | 76744818 | 76745015 | KAT6B    | NM_012330    | 18 | 16 | 12    | 162     | 349   | 15611  | 78,84  | 100        |
| chr10 | 76748768 | 76748941 | KAT6B    | NM_012330    | 18 | 16 | 13    | 94      | 473   | 19799  | 113,79 | 100        |
| chr10 | 76780243 | 76780541 | KAT6B    | NM_012330    | 18 | 16 | 14    | 232     | 1098  | 48886  | 163,5  | 87,1       |
| chr10 | 76780884 | 76781084 | KAT6B    | NM_012330    | 18 | 16 | 15    | 160     | 295   | 12450  | 61,94  | 100        |
| chr10 | 76781639 | 76781818 | KAT6B    | NM_012330    | 18 | 16 | 16    | 351     | 174   | 7825   | 43,47  | 51,3       |
| chr10 | 76781888 | 76782008 | KAT6B    | NM_012330    | 18 | 16 | 16    | 351     | 84    | 2810   | 23,22  | 29,1       |
| chr10 | 76784772 | 76785049 | KAT6B    | NM_012330    | 18 | 16 | 17    | 292     | 587   | 26781  | 96,33  | 80,8       |
| chr10 | 76788186 | 76788629 | KAT6B    | NM_012330    | 18 | 16 | 18    | 2558    | 442   | 20960  | 47,21  | 15         |
| chr10 | 76788675 | 76790937 | KAT6B    | NM_012330    | 18 | 16 | 18    | 2558    | 11627 | 565654 | 249,96 | 83,3       |
| chr10 | 79737112 | 79737475 | POLR3A   | NM_007055    | 31 | 31 | 31    | 149     | 584   | 28249  | 77,61  | 100        |
| chr10 | 79739789 | 79739995 | POLR3A   | NM_007055    | 31 | 31 | 30    | 133     | 663   | 25868  | 124,97 | 72,9       |
| chr10 | 79741223 | 79741426 | POLR3A   | NM_007055    | 31 | 31 | 29    | 132     | 1471  | 61612  | 302,02 | 72         |
| chr10 | 79741818 | 79742033 | POLR3A   | NM_007055    | 31 | 31 | 28    | 165     | 550   | 24096  | 111,56 | 73,9       |
| chr10 | 79742443 | 79742664 | POLR3A   | NM_007055    | 31 | 31 | 27    | 165     | 309   | 12700  | 57,21  | 80,6       |

|       |          |          |        |           |    |    |       |             |      |       |        |                  |
|-------|----------|----------|--------|-----------|----|----|-------|-------------|------|-------|--------|------------------|
| chr10 | 79743548 | 79743763 | POLR3A | NM_007055 | 31 | 31 | 26    | 93          | 657  | 29737 | 137,67 | 92,5             |
| chr10 | 79743840 | 79744049 | POLR3A | NM_007055 | 31 | 31 | 25    | 94          | 319  | 13525 | 64,4   | 92,6             |
| chr10 | 79744843 | 79745049 | POLR3A | NM_007055 | 31 | 31 | 24    | 171         | 755  | 32870 | 158,79 | 71,3             |
| chr10 | 79745720 | 79745973 | POLR3A | NM_007055 | 31 | 31 | 23,22 | 83,87       | 460  | 21424 | 84,35  | 28,9,100.0       |
| chr10 | 79750834 | 79751037 | POLR3A | NM_007055 | 31 | 31 | 21    | 114         | 257  | 11794 | 57,81  | 80,7             |
| chr10 | 79752894 | 79753064 | POLR3A | NM_007055 | 31 | 31 | 20    | 171         | 1490 | 65815 | 384,88 | 64,3             |
| chr10 | 79759782 | 79759961 | POLR3A | NM_007055 | 31 | 31 | 19    | 138         | 388  | 16665 | 92,58  | 68,8             |
| chr10 | 79760683 | 79760907 | POLR3A | NM_007055 | 31 | 31 | 18    | 119         | 294  | 12979 | 57,68  | 100              |
| chr10 | 79761985 | 79762170 | POLR3A | NM_007055 | 31 | 31 | 17    | 112         | 80   | 3316  | 17,83  | 73,2             |
| chr10 | 79764525 | 79764734 | POLR3A | NM_007055 | 31 | 31 | 16    | 173         | 560  | 24736 | 117,79 | 70,5             |
| chr10 | 79767429 | 79767641 | POLR3A | NM_007055 | 31 | 31 | 15    | 165         | 510  | 20746 | 97,4   | 100              |
| chr10 | 79769188 | 79769412 | POLR3A | NM_007055 | 31 | 31 | 14    | 139         | 1897 | 85804 | 381,35 | 84,9             |
| chr10 | 79769615 | 79769818 | POLR3A | NM_007055 | 31 | 31 | 13    | 128         | 345  | 15389 | 75,44  | 100              |
| chr10 | 79770193 | 79770402 | POLR3A | NM_007055 | 31 | 31 | 12    | 70          | 686  | 31095 | 148,07 | 100              |
| chr10 | 79773452 | 79773631 | POLR3A | NM_007055 | 31 | 31 | 11    | 141         | 120  | 4633  | 25,74  | 68,8             |
| chr10 | 79777375 | 79777551 | POLR3A | NM_007055 | 31 | 31 | 10    | 142         | 398  | 16934 | 95,67  | 70,4             |
| chr10 | 79778835 | 79779053 | POLR3A | NM_007055 | 31 | 31 | 9     | 104         | 544  | 21579 | 98,53  | 100              |
| chr10 | 79781377 | 79782205 | POLR3A | NM_007055 | 31 | 31 | 8,7,6 | 137.163.240 | 1167 | 55388 | 66,81  | 46,7,100.0,100.0 |
| chr10 | 79784298 | 79784471 | POLR3A | NM_007055 | 31 | 31 | 5     | 155         | 65   | 2746  | 15,78  | 100              |
| chr10 | 79784729 | 79784944 | POLR3A | NM_007055 | 31 | 31 | 4     | 172         | 644  | 28849 | 133,56 | 100              |
| chr10 | 79785333 | 79785548 | POLR3A | NM_007055 | 31 | 31 | 3     | 138         | 1149 | 47725 | 220,95 | 100              |
| chr10 | 79785894 | 79786094 | POLR3A | NM_007055 | 31 | 31 | 2     | 136         | 580  | 25015 | 124,45 | 69,1             |
| chr10 | 79789048 | 79789236 | POLR3A | NM_007055 | 31 | 31 | 1     | 44          | 896  | 39841 | 210,8  | 100              |
| chr10 | 82033379 | 82033656 | MAT1A  | NM_000429 | 9  | 9  | 9     | 103         | 335  | 15278 | 54,96  | 100              |
| chr10 | 82034167 | 82034373 | MAT1A  | NM_000429 | 9  | 9  | 8     | 134         | 817  | 35813 | 173,01 | 73,1             |
| chr10 | 82034832 | 82035029 | MAT1A  | NM_000429 | 9  | 9  | 7     | 183         | 104  | 4346  | 21,95  | 67,8             |
| chr10 | 82036058 | 82036365 | MAT1A  | NM_000429 | 9  | 9  | 6     | 219         | 714  | 31347 | 101,78 | 100              |
| chr10 | 82039825 | 82040031 | MAT1A  | NM_000429 | 9  | 9  | 5     | 144         | 85   | 3809  | 18,4   | 71,5             |
| chr10 | 82040451 | 82040651 | MAT1A  | NM_000429 | 9  | 9  | 4     | 113         | 1018 | 45923 | 228,47 | 86,7             |
| chr10 | 82043680 | 82043892 | MAT1A  | NM_000429 | 9  | 9  | 3     | 123         | 341  | 14171 | 66,53  | 93,5             |
| chr10 | 82045191 | 82045409 | MAT1A  | NM_000429 | 9  | 9  | 2     | 78          | 989  | 43057 | 196,61 | 100              |
| chr10 | 82049008 | 82049294 | MAT1A  | NM_000429 | 9  | 9  | 1     | 91          | 1023 | 46683 | 162,66 | 100              |
| chr10 | 89624053 | 89624253 | PTEN   | NM_000314 | 9  | 9  | 1     | 79          | 1401 | 63589 | 316,36 | 34,2             |
| chr10 | 89653798 | 89653971 | PTEN   | NM_000314 | 9  | 9  | 2     | 85          | 323  | 13198 | 75,85  | 81,2             |
| chr10 | 89685266 | 89685457 | PTEN   | NM_000314 | 9  | 9  | 3     | 45          | 242  | 10195 | 53,1   | 100              |
| chr10 | 89690754 | 89690945 | PTEN   | NM_000314 | 9  | 9  | 4     | 44          | 258  | 11312 | 58,92  | 100              |
| chr10 | 89692805 | 89693094 | PTEN   | NM_000314 | 9  | 9  | 5     | 239         | 1042 | 41913 | 144,53 | 85,4             |
| chr10 | 89711920 | 89712111 | PTEN   | NM_000314 | 9  | 9  | 6     | 142         | 534  | 21297 | 110,92 | 68,3             |
| chr10 | 89717667 | 89717861 | PTEN   | NM_000314 | 9  | 9  | 7     | 167         | 258  | 10926 | 56,03  | 65,9             |
| chr10 | 89720547 | 89720747 | PTEN   | NM_000314 | 9  | 9  | 8     | 225         | 43   | 1073  | 5,34   | 43,1             |
| chr10 | 89720761 | 89720877 | PTEN   | NM_000314 | 9  | 9  | 8     | 225         | 226  | 9362  | 80,02  | 51,1             |
| chr10 | 94353092 | 94353301 | KIF11  | NM_004523 | 22 | 22 | 1     | 77          | 268  | 11063 | 52,68  | 100              |
| chr10 | 94365999 | 94366172 | KIF11  | NM_004523 | 22 | 22 | 2     | 133         | 270  | 11679 | 67,12  | 100              |
| chr10 | 94366333 | 94366518 | KIF11  | NM_004523 | 22 | 22 | 3     | 98          | 184  | 8549  | 45,96  | 100              |
| chr10 | 94366809 | 94366991 | KIF11  | NM_004523 | 22 | 22 | 4     | 79          | 50   | 2177  | 11,9   | 96,2             |
| chr10 | 94368836 | 94369012 | KIF11  | NM_004523 | 22 | 22 | 5     | 186         | 299  | 12528 | 70,78  | 68,3             |
| chr10 | 94369076 | 94369344 | KIF11  | NM_004523 | 22 | 22 | 6     | 125         | 208  | 8964  | 33,32  | 100              |
| chr10 | 94372792 | 94373004 | KIF11  | NM_004523 | 22 | 22 | 7     | 91          | 394  | 16733 | 78,56  | 100              |
| chr10 | 94373117 | 94373394 | KIF11  | NM_004523 | 22 | 22 | 8     | 243         | 424  | 18270 | 65,72  | 100              |
| chr10 | 94376450 | 94376638 | KIF11  | NM_004523 | 22 | 22 | 9     | 96          | 210  | 9116  | 48,23  | 100              |
| chr10 | 94381067 | 94381255 | KIF11  | NM_004523 | 22 | 22 | 10    | 89          | 271  | 11833 | 62,61  | 100              |
| chr10 | 94388541 | 94388726 | KIF11  | NM_004523 | 22 | 22 | 11    | 88          | 10   | 441   | 2,37   | 100              |
| chr10 | 94389998 | 94390186 | KIF11  | NM_004523 | 22 | 22 | 12    | 189         | 234  | 10108 | 53,48  | 65,6             |
| chr10 | 94392243 | 94392431 | KIF11  | NM_004523 | 22 | 22 | 13    | 208         | 166  | 7168  | 37,93  | 90,9             |
| chr10 | 94393347 | 94393544 | KIF11  | NM_004523 | 22 | 22 | 14    | 173         | 229  | 10793 | 54,51  | 95,4             |
| chr10 | 94396986 | 94397370 | KIF11  | NM_004523 | 22 | 22 | 15,16 | 126.159     | 790  | 34744 | 90,24  | 64.3,100.0       |
| chr10 | 94399482 | 94399658 | KIF11  | NM_004523 | 22 | 22 | 17    | 107         | 204  | 8824  | 49,85  | 100              |



|       |           |           |          |           |    |    |       |         |      |        |        |            |
|-------|-----------|-----------|----------|-----------|----|----|-------|---------|------|--------|--------|------------|
| chr10 | 94405083  | 94405360  | KIF11    | NM_004523 | 22 | 22 | 18    | 280     | 363  | 16480  | 59,28  | 86,1       |
| chr10 | 94407918  | 94408192  | KIF11    | NM_004523 | 22 | 22 | 19    | 223     | 386  | 17468  | 63,52  | 100        |
| chr10 | 94409564  | 94409752  | KIF11    | NM_004523 | 22 | 22 | 20    | 152     | 327  | 14241  | 75,35  | 100        |
| chr10 | 94410133  | 94410333  | KIF11    | NM_004523 | 22 | 22 | 21    | 117     | 169  | 7165   | 35,65  | 100        |
| chr10 | 94413415  | 94413689  | KIF11    | NM_004523 | 22 | 22 | 22    | 132     | 227  | 10045  | 36,53  | 100        |
| chr10 | 97366450  | 97366635  | ALDH18A1 | NM_002860 | 18 | 17 | 18    | 182     | 156  | 6601   | 35,49  | 64,3       |
| chr10 | 97369832  | 97370035  | ALDH18A1 | NM_002860 | 18 | 17 | 17    | 96      | 931  | 40769  | 199,85 | 85,4       |
| chr10 | 97371077  | 97371271  | ALDH18A1 | NM_002860 | 18 | 17 | 16    | 187     | 134  | 5993   | 30,73  | 65,8       |
| chr10 | 97373533  | 97373955  | ALDH18A1 | NM_002860 | 18 | 17 | 15,14 | 122.196 | 2422 | 116868 | 276,28 | 72.1,100.0 |
| chr10 | 97376244  | 97376444  | ALDH18A1 | NM_002860 | 18 | 17 | 13    | 138     | 537  | 22990  | 114,38 | 92,8       |
| chr10 | 97380688  | 97380980  | ALDH18A1 | NM_002860 | 18 | 17 | 12    | 221     | 657  | 31817  | 108,59 | 87,3       |
| chr10 | 97385131  | 97385319  | ALDH18A1 | NM_002860 | 18 | 17 | 11    | 94      | 260  | 9615   | 50,87  | 87,2       |
| chr10 | 97386345  | 97386530  | ALDH18A1 | NM_002860 | 18 | 17 | 10    | 74      | 1690 | 69269  | 372,41 | 95,9       |
| chr10 | 97387110  | 97387301  | ALDH18A1 | NM_002860 | 18 | 17 | 9     | 145     | 371  | 16163  | 84,18  | 71         |
| chr10 | 97388056  | 97388268  | ALDH18A1 | NM_002860 | 18 | 17 | 8     | 125     | 413  | 18095  | 84,95  | 100        |
| chr10 | 97392732  | 97392917  | ALDH18A1 | NM_002860 | 18 | 17 | 7     | 91      | 218  | 10114  | 54,38  | 82,4       |
| chr10 | 97393298  | 97393483  | ALDH18A1 | NM_002860 | 18 | 17 | 6     | 159     | 314  | 14126  | 75,95  | 68,6       |
| chr10 | 97396856  | 97397213  | ALDH18A1 | NM_002860 | 18 | 17 | 5,4   | 105.150 | 776  | 36847  | 102,92 | 94.3,100.0 |
| chr10 | 97402830  | 97403012  | ALDH18A1 | NM_002860 | 18 | 17 | 3     | 215     | 80   | 3093   | 16,9   | 62,3       |
| chr10 | 97412988  | 97413200  | ALDH18A1 | NM_002860 | 18 | 17 | 2     | 88      | 565  | 24443  | 114,76 | 100        |
| chr10 | 101474201 | 101474561 | COX15    | NM_078470 | 9  | 9  | 9     | 132     | 614  | 27522  | 76,24  | 100        |
| chr10 | 101476052 | 101476270 | COX15    | NM_078470 | 9  | 9  | 8     | 114     | 135  | 5398   | 24,65  | 100        |
| chr10 | 101478106 | 101478315 | COX15    | NM_078470 | 9  | 9  | 7     | 155     | 209  | 9156   | 43,6   | 98,1       |
| chr10 | 101480753 | 101480950 | COX15    | NM_078470 | 9  | 9  | 6     | 82      | 332  | 13640  | 68,89  | 89         |
| chr10 | 101483651 | 101483869 | COX15    | NM_078470 | 9  | 9  | 5     | 168     | 375  | 16246  | 74,18  | 93,5       |
| chr10 | 101486789 | 101486968 | COX15    | NM_078470 | 9  | 9  | 4     | 187     | 587  | 25141  | 139,67 | 65,8       |
| chr10 | 101487155 | 101487343 | COX15    | NM_078470 | 9  | 9  | 3     | 123     | 473  | 21248  | 112,42 | 100        |
| chr10 | 101489225 | 101489443 | COX15    | NM_078470 | 9  | 9  | 2     | 182     | 910  | 42716  | 195,05 | 73,6       |
| chr10 | 101491703 | 101492137 | COX15    | NM_078470 | 9  | 9  | 1     | 90      | 461  | 22084  | 50,77  | 100        |
| chr10 | 112328660 | 112328860 | SMC3     | NM_005445 | 29 | 29 | 2     | 76      | 161  | 6837   | 34,01  | 100        |
| chr10 | 112333440 | 112333658 | SMC3     | NM_005445 | 29 | 29 | 3     | 39      | 67   | 2946   | 13,45  | 100        |
| chr10 | 112334997 | 112335182 | SMC3     | NM_005445 | 29 | 29 | 4     | 68      | 208  | 9284   | 49,91  | 100        |
| chr10 | 112337099 | 112337269 | SMC3     | NM_005445 | 29 | 29 | 5     | 72      | 652  | 27409  | 160,29 | 100        |
| chr10 | 112337514 | 112337687 | SMC3     | NM_005445 | 29 | 29 | 6     | 80      | 270  | 12730  | 73,16  | 100        |
| chr10 | 112338288 | 112338494 | SMC3     | NM_005445 | 29 | 29 | 7     | 79      | 533  | 23267  | 112,4  | 100        |
| chr10 | 112340587 | 112340781 | SMC3     | NM_005445 | 29 | 29 | 8     | 118     | 464  | 20829  | 106,82 | 100        |
| chr10 | 112341680 | 112341874 | SMC3     | NM_005445 | 29 | 29 | 9     | 176     | 209  | 8509   | 43,64  | 100        |
| chr10 | 112342238 | 112342429 | SMC3     | NM_005445 | 29 | 29 | 10    | 81      | 399  | 18284  | 95,23  | 100        |
| chr10 | 112343192 | 112343392 | SMC3     | NM_005445 | 29 | 29 | 11    | 165     | 400  | 17814  | 88,63  | 69,7       |
| chr10 | 112343616 | 112343810 | SMC3     | NM_005445 | 29 | 29 | 12    | 122     | 676  | 27504  | 141,05 | 86,1       |
| chr10 | 112343887 | 112344075 | SMC3     | NM_005445 | 29 | 29 | 13    | 214     | 171  | 6237   | 33     | 63,1       |
| chr10 | 112349392 | 112349847 | SMC3     | NM_005445 | 29 | 29 | 14,15 | 104.100 | 668  | 30748  | 67,43  | 72.1,100.0 |
| chr10 | 112350191 | 112350370 | SMC3     | NM_005445 | 29 | 29 | 16    | 161     | 503  | 21135  | 117,42 | 87         |
| chr10 | 112350647 | 112350874 | SMC3     | NM_005445 | 29 | 29 | 17    | 142     | 369  | 14961  | 65,62  | 88,7       |
| chr10 | 112352820 | 112352993 | SMC3     | NM_005445 | 29 | 29 | 18    | 151     | 432  | 17852  | 102,6  | 100        |
| chr10 | 112356116 | 112356301 | SMC3     | NM_005445 | 29 | 29 | 19    | 153     | 129  | 5253   | 28,24  | 95,4       |
| chr10 | 112357863 | 112358057 | SMC3     | NM_005445 | 29 | 29 | 20    | 152     | 298  | 13185  | 67,62  | 100        |
| chr10 | 112359387 | 112359599 | SMC3     | NM_005445 | 29 | 29 | 21    | 159     | 401  | 17573  | 82,5   | 100        |
| chr10 | 112360195 | 112360383 | SMC3     | NM_005445 | 29 | 29 | 22    | 108     | 374  | 15361  | 81,28  | 100        |
| chr10 | 112360709 | 112360903 | SMC3     | NM_005445 | 29 | 29 | 23    | 109     | 156  | 6225   | 31,92  | 100        |
| chr10 | 112361308 | 112361920 | SMC3     | NM_005445 | 29 | 29 | 24,25 | 248.213 | 755  | 35996  | 58,72  | 100.0,92.5 |
| chr10 | 112362374 | 112362624 | SMC3     | NM_005445 | 29 | 29 | 26,27 | 192.178 | 233  | 9958   | 39,67  | 26.0,23.6  |
| chr10 | 112362694 | 112363134 | SMC3     | NM_005445 | 29 | 29 | 27,28 | 178.107 | 721  | 32813  | 74,41  | 37.6,100.0 |
| chr10 | 112364018 | 112364230 | SMC3     | NM_005445 | 29 | 29 | 29    | 72      | 370  | 16708  | 78,44  | 59,7       |
| chr10 | 112723986 | 112724796 | SHOC2    | NM_007373 | 9  | 8  | 2     | 703     | 1451 | 68221  | 84,12  | 96,7       |
| chr10 | 112745423 | 112745602 | SHOC2    | NM_007373 | 9  | 8  | 3     | 138     | 408  | 18541  | 103,01 | 73,2       |
| chr10 | 112760104 | 112760304 | SHOC2    | NM_007373 | 9  | 8  | 4     | 131     | 127  | 5303   | 26,38  | 100        |

|       |           |           |          |              |    |    |            |                    |      |        |        |                              |
|-------|-----------|-----------|----------|--------------|----|----|------------|--------------------|------|--------|--------|------------------------------|
| chr10 | 112764360 | 112764545 | SHOC2    | NM_007373    | 9  | 8  | 5          | 189                | 294  | 11897  | 63,96  | 96,3                         |
| chr10 | 112767249 | 112767449 | SHOC2    | NM_007373    | 9  | 8  | 6          | 123                | 282  | 11957  | 59,49  | 100                          |
| chr10 | 112768986 | 112769159 | SHOC2    | NM_007373    | 9  | 8  | 7          | 138                | 298  | 13392  | 76,97  | 100                          |
| chr10 | 112769450 | 112769659 | SHOC2    | NM_007373    | 9  | 8  | 8          | 118                | 236  | 10282  | 48,96  | 100                          |
| chr10 | 112771344 | 112771680 | SHOC2    | NM_007373    | 9  | 8  | 9          | 209                | 1117 | 54411  | 161,46 | 100                          |
| chr10 | 119302715 | 119303211 | EMX2     | NM_004098    | 3  | 3  | 1          | 406                | 573  | 25557  | 51,42  | 100                          |
| chr10 | 119305149 | 119305334 | EMX2     | NM_004098    | 3  | 3  | 2          | 185                | 130  | 5536   | 29,76  | 96,8                         |
| chr10 | 119307572 | 119307855 | EMX2     | NM_004098    | 3  | 3  | 3          | 168                | 133  | 5974   | 21,04  | 100                          |
| chr10 | 123238977 | 123239571 | FGFR2    | NM_022970    | 18 | 17 | 18         | 165                | 1806 | 86541  | 145,45 | 100                          |
| chr10 | 123243233 | 123243409 | FGFR2    | NM_022970    | 18 | 17 | 17         | 106                | 372  | 16046  | 90,66  | 80,2                         |
| chr10 | 123244937 | 123245125 | FGFR2    | NM_022970    | 18 | 17 | 16         | 138                | 910  | 37482  | 198,32 | 79,7                         |
| chr10 | 123246781 | 123246981 | FGFR2    | NM_022970    | 18 | 17 | 15         | 71                 | 416  | 18071  | 89,91  | 100                          |
| chr10 | 123247471 | 123247653 | FGFR2    | NM_022970    | 18 | 17 | 14         | 123                | 284  | 12434  | 67,95  | 100                          |
| chr10 | 123255974 | 123256165 | FGFR2    | NM_022970    | 18 | 17 | 13         | 191                | 585  | 25295  | 131,74 | 62,8                         |
| chr10 | 123258020 | 123258214 | FGFR2    | NM_022970    | 18 | 17 | 12         | 111                | 834  | 35971  | 184,47 | 90,1                         |
| chr10 | 123260375 | 123260566 | FGFR2    | NM_022970    | 18 | 17 | 11         | 122                | 435  | 17982  | 93,66  | 71,3                         |
| chr10 | 123263207 | 123263407 | FGFR2    | NM_022970    | 18 | 17 | 10         | 152                | 550  | 22632  | 112,6  | 68,4                         |
| chr10 | 123274700 | 123274888 | FGFR2    | NM_022970    | 18 | 17 | 9          | 203                | 341  | 13248  | 70,1   | 66                           |
| chr10 | 123278157 | 123278369 | FGFR2    | NM_022970    | 18 | 17 | 8          | 148                | 97   | 4243   | 19,92  | 100                          |
| chr10 | 123279452 | 123279649 | FGFR2    | NM_022970    | 18 | 17 | 7          | 191                | 351  | 15264  | 77,09  | 82,2                         |
| chr10 | 123297803 | 123298172 | FGFR2    | NM_022970    | 18 | 17 | 6          | 124                | 943  | 42497  | 114,86 | 54                           |
| chr10 | 123310743 | 123310913 | FGFR2    | NM_022970    | 18 | 17 | 5          | 170                | 776  | 35185  | 205,76 | 64,7                         |
| chr10 | 123324011 | 123324202 | FGFR2    | NM_022970    | 18 | 17 | 4          | 78                 | 430  | 17266  | 89,93  | 100                          |
| chr10 | 123324878 | 123325161 | FGFR2    | NM_022970    | 18 | 17 | 3          | 267                | 1976 | 90252  | 317,79 | 78,7                         |
| chr10 | 123353144 | 123353430 | FGFR2    | NM_022970    | 18 | 17 | 2          | 109                | 1869 | 82349  | 286,93 | 100                          |
| chr11 | 532484    | 532708    | HRAS     | NM_001130442 | 5  | 4  | 5          | 120                | 89   | 3314   | 14,73  | 60,8                         |
| chr11 | 533268    | 533957    | HRAS     | NM_001130442 | 5  | 4  | 4,3        | 160.179            | 1708 | 80135  | 116,14 | 100,0,100,0                  |
| chr11 | 534144    | 534332    | HRAS     | NM_001130442 | 5  | 4  | 2          | 111                | 91   | 3725   | 19,71  | 100                          |
| chr11 | 791861    | 792932    | SLC25A22 | NM_024698    | 10 | 9  | 10,9,8,7,6 | 154,76,155,175,119 | 296  | 13413  | 12,51  | 100,0,100,0,100,0,100,0,52,9 |
| chr11 | 793458    | 793637    | SLC25A22 | NM_024698    | 10 | 9  | 5          | 91                 | 486  | 22315  | 123,97 | 100                          |
| chr11 | 794182    | 794533    | SLC25A22 | NM_024698    | 10 | 9  | 4          | 56                 | 182  | 7785   | 22,12  | 100                          |
| chr11 | 794736    | 795093    | SLC25A22 | NM_024698    | 10 | 9  | 3,2        | 126,20             | 192  | 8975   | 25,07  | 100,0,100,0                  |
| chr11 | 6411710   | 6412224   | SMPD1    | NM_000543    | 6  | 6  | 1          | 318                | 576  | 27819  | 54,02  | 100                          |
| chr11 | 6412650   | 6413505   | SMPD1    | NM_000543    | 6  | 6  | 2          | 773                | 1066 | 50276  | 58,73  | 95,3                         |
| chr11 | 6414356   | 6414556   | SMPD1    | NM_000543    | 6  | 6  | 3          | 172                | 387  | 16306  | 81,12  | 64,5                         |
| chr11 | 6414739   | 6414939   | SMPD1    | NM_000543    | 6  | 6  | 4          | 77                 | 1642 | 69783  | 347,18 | 100                          |
| chr11 | 6415150   | 6415937   | SMPD1    | NM_000543    | 6  | 6  | 5,6        | 146.410            | 2770 | 131586 | 166,99 | 83,6,100,0                   |
| chr11 | 17408406  | 17409738  | KCNJ11   | NM_000525    | 1  | 1  | 1          | 1173               | 2570 | 122885 | 92,19  | 100                          |
| chr11 | 31811327  | 31811592  | PAX6     | NM_001604    | 14 | 11 | 14         | 86                 | 246  | 10135  | 38,1   | 100                          |
| chr11 | 31812157  | 31812360  | PAX6     | NM_001604    | 14 | 11 | 13         | 151                | 336  | 14929  | 73,18  | 68,2                         |
| chr11 | 31814981  | 31815344  | PAX6     | NM_001604    | 14 | 11 | 12,11      | 116.151            | 397  | 19054  | 52,35  | 100,0,96,0                   |
| chr11 | 31815481  | 31815690  | PAX6     | NM_001604    | 14 | 11 | 10         | 83                 | 1281 | 56340  | 268,29 | 100                          |
| chr11 | 31816123  | 31816311  | PAX6     | NM_001604    | 14 | 11 | 9          | 159                | 274  | 11847  | 62,68  | 84,3                         |
| chr11 | 31822296  | 31822493  | PAX6     | NM_001604    | 14 | 11 | 8          | 166                | 422  | 17989  | 90,85  | 65,7                         |
| chr11 | 31823167  | 31823515  | PAX6     | NM_001604    | 14 | 11 | 7,6        | 216,42             | 1041 | 46381  | 132,9  | 73,1,100,0                   |
| chr11 | 31824288  | 31824485  | PAX6     | NM_001604    | 14 | 11 | 5          | 131                | 88   | 3758   | 18,98  | 72,5                         |
| chr11 | 31827920  | 31828117  | PAX6     | NM_001604    | 14 | 11 | 4          | 10                 | 234  | 10515  | 53,11  | 100                          |
| chr11 | 45827240  | 45827926  | SLC35C1  | NM_018389    | 2  | 2  | 1          | 535                | 2187 | 104064 | 151,48 | 100                          |
| chr11 | 45832332  | 45833024  | SLC35C1  | NM_018389    | 2  | 2  | 2          | 560                | 704  | 31955  | 46,11  | 99,1                         |
| chr11 | 47600384  | 47601052  | NDUFS3   | NM_004551    | 7  | 7  | 1,2        | 67,66              | 2322 | 105530 | 157,74 | 100,0,100,0                  |
| chr11 | 47602029  | 47602685  | NDUFS3   | NM_004551    | 7  | 7  | 3,4        | 98.150             | 1442 | 69640  | 106    | 100,0,100,0                  |
| chr11 | 47603534  | 47603974  | NDUFS3   | NM_004551    | 7  | 7  | 5,6        | 126.120            | 2793 | 129555 | 293,78 | 100,0,61,7                   |
| chr11 | 47605911  | 47606114  | NDUFS3   | NM_004551    | 7  | 7  | 7          | 168                | 739  | 32788  | 160,73 | 73,2                         |
| chr11 | 62457753  | 62458300  | BSCL2    | NM_001122955 | 11 | 11 | 11,10,9    | 155,81,81          | 420  | 18937  | 34,56  | 100,0,100,0,51,9             |
| chr11 | 62458575  | 62458932  | BSCL2    | NM_001122955 | 11 | 11 | 8,7        | 67.142             | 1412 | 66567  | 185,94 | 58,2,100,0                   |
| chr11 | 62459730  | 62459933  | BSCL2    | NM_001122955 | 11 | 11 | 6          | 98                 | 1021 | 45794  | 224,48 | 87,8                         |
| chr11 | 62460038  | 62460229  | BSCL2    | NM_001122955 | 11 | 11 | 5          | 135                | 1160 | 49287  | 256,7  | 70,4                         |

|       |          |          |          |              |    |    |          |                |      |        |        |                         |
|-------|----------|----------|----------|--------------|----|----|----------|----------------|------|--------|--------|-------------------------|
| chr11 | 62462076 | 62462261 | BSCL2    | NM_001122955 | 11 | 11 | 4        | 144            | 861  | 33399  | 179,56 | 75                      |
| chr11 | 62469841 | 62470062 | BSCL2    | NM_001122955 | 11 | 11 | 3        | 82             | 999  | 46209  | 208,15 | 100                     |
| chr11 | 62472674 | 62473046 | BSCL2    | NM_001122955 | 11 | 11 | 2        | 317            | 329  | 15430  | 41,37  | 86,4                    |
| chr11 | 62474594 | 62474785 | BSCL2    | NM_001122955 | 11 | 11 | 1        | 87             | 532  | 22124  | 115,23 | 85,1                    |
| chr11 | 65487143 | 65488285 | RNASEH2C | NM_032193    | 4  | 4  | 4,3,2,1  | 27.120.176.172 | 2306 | 111348 | 97,42  | 100.0,100.0,100.0,100.0 |
| chr11 | 65837929 | 65838372 | PACS1    | NM_018026    | 24 | 24 | 1        | 356            | 14   | 582    | 1,31   | 100                     |
| chr11 | 65960849 | 65961043 | PACS1    | NM_018026    | 24 | 24 | 2        | 88             | 335  | 14926  | 76,54  | 98,9                    |
| chr11 | 65977807 | 65978007 | PACS1    | NM_018026    | 24 | 24 | 3        | 90             | 1364 | 56833  | 282,75 | 100                     |
| chr11 | 65978495 | 65978704 | PACS1    | NM_018026    | 24 | 24 | 4        | 126            | 15   | 681    | 3,24   | 79,4                    |
| chr11 | 65983621 | 65983815 | PACS1    | NM_018026    | 24 | 24 | 5        | 145            | 478  | 20671  | 106,01 | 78,6                    |
| chr11 | 65983931 | 65984288 | PACS1    | NM_018026    | 24 | 24 | 6,7      | 92,81          | 1315 | 61253  | 171,1  | 100.0,100.0             |
| chr11 | 65987045 | 65987316 | PACS1    | NM_018026    | 24 | 24 | 8        | 60             | 853  | 37386  | 137,45 | 100                     |
| chr11 | 65988051 | 65988263 | PACS1    | NM_018026    | 24 | 24 | 9        | 161            | 260  | 11634  | 54,62  | 100                     |
| chr11 | 65988514 | 65988711 | PACS1    | NM_018026    | 24 | 24 | 10       | 94             | 928  | 39233  | 198,15 | 92,6                    |
| chr11 | 65994971 | 65995177 | PACS1    | NM_018026    | 24 | 24 | 11       | 81             | 227  | 9791   | 47,3   | 100                     |
| chr11 | 65997946 | 65998362 | PACS1    | NM_018026    | 24 | 24 | 12,13    | 116.136        | 731  | 33865  | 81,21  | 100.0,64.0              |
| chr11 | 65999525 | 65999731 | PACS1    | NM_018026    | 24 | 24 | 14       | 105            | 582  | 26299  | 127,05 | 84,8                    |
| chr11 | 66000455 | 66000655 | PACS1    | NM_018026    | 24 | 24 | 15       | 107            | 598  | 25320  | 125,97 | 77,6                    |
| chr11 | 66001244 | 66001417 | PACS1    | NM_018026    | 24 | 24 | 16       | 155            | 396  | 16230  | 93,28  | 100                     |
| chr11 | 66001554 | 66001742 | PACS1    | NM_018026    | 24 | 24 | 17       | 111            | 698  | 30138  | 159,46 | 100                     |
| chr11 | 66002791 | 66002991 | PACS1    | NM_018026    | 24 | 24 | 18       | 103            | 184  | 8206   | 40,83  | 81,6                    |
| chr11 | 66003289 | 66003504 | PACS1    | NM_018026    | 24 | 24 | 19       | 43             | 3274 | 148336 | 686,74 | 100                     |
| chr11 | 66006135 | 66006320 | PACS1    | NM_018026    | 24 | 24 | 20       | 43             | 229  | 10547  | 56,7   | 100                     |
| chr11 | 66006526 | 66006708 | PACS1    | NM_018026    | 24 | 24 | 21       | 136            | 542  | 24105  | 131,72 | 70,6                    |
| chr11 | 66008827 | 66009116 | PACS1    | NM_018026    | 24 | 24 | 22       | 227            | 311  | 13211  | 45,56  | 96,5                    |
| chr11 | 66010374 | 66010784 | PACS1    | NM_018026    | 24 | 24 | 23,24    | 120.116        | 553  | 25595  | 62,27  | 100.0,100.0             |
| chr11 | 66278115 | 66278324 | BBS1     | NM_024649    | 17 | 17 | 1        | 47             | 562  | 20477  | 97,51  | 100                     |
| chr11 | 66278367 | 66278804 | BBS1     | NM_024649    | 17 | 17 | 2,3      | 77,35          | 3762 | 174904 | 399,32 | 100.0,100.0             |
| chr11 | 66281944 | 66282197 | BBS1     | NM_024649    | 17 | 17 | 4        | 273            | 1313 | 60446  | 237,98 | 75,5                    |
| chr11 | 66283014 | 66283451 | BBS1     | NM_024649    | 17 | 17 | 5,6,7    | 47,39,73       | 891  | 37436  | 85,47  | 93.6,100.0,100.0        |
| chr11 | 66287101 | 66287328 | BBS1     | NM_024649    | 17 | 17 | 8        | 132            | 488  | 20317  | 89,11  | 90,2                    |
| chr11 | 66288726 | 66288935 | BBS1     | NM_024649    | 17 | 17 | 9        | 107            | 379  | 14955  | 71,21  | 100                     |
| chr11 | 66290844 | 66291314 | BBS1     | NM_024649    | 17 | 17 | 10,11    | 121.159        | 1956 | 86301  | 183,23 | 100.0,75.5              |
| chr11 | 66293453 | 66293659 | BBS1     | NM_024649    | 17 | 17 | 12       | 70             | 661  | 29546  | 142,73 | 94,3                    |
| chr11 | 66294042 | 66294417 | BBS1     | NM_024649    | 17 | 17 | 13       | 159            | 1483 | 65250  | 173,54 | 100                     |
| chr11 | 66297313 | 66297528 | BBS1     | NM_024649    | 17 | 17 | 14       | 134            | 73   | 3074   | 14,23  | 82,8                    |
| chr11 | 66298340 | 66298528 | BBS1     | NM_024649    | 17 | 17 | 15       | 135            | 1348 | 51560  | 272,8  | 100                     |
| chr11 | 66299176 | 66299631 | BBS1     | NM_024649    | 17 | 17 | 16,17    | 87,87          | 158  | 6744   | 14,79  | 43.7,100.0              |
| chr11 | 66616288 | 66616808 | PC       | NM_022172    | 21 | 20 | 21,20    | 249.141        | 1298 | 62228  | 119,44 | 100.0,76.6              |
| chr11 | 66617082 | 66617928 | PC       | NM_022172    | 21 | 20 | 19,18,17 | 249.180.245    | 1794 | 85307  | 100,72 | 100.0,100.0,97.1        |
| chr11 | 66618201 | 66618804 | PC       | NM_022172    | 21 | 20 | 16,15    | 250.241        | 250  | 11129  | 18,43  | 77.6,100.0              |
| chr11 | 66619172 | 66619366 | PC       | NM_022172    | 21 | 20 | 14       | 157            | 207  | 8998   | 46,14  | 67,5                    |
| chr11 | 66619873 | 66620301 | PC       | NM_022172    | 21 | 20 | 13,12    | 222,90         | 884  | 39490  | 92,05  | 100.0,93.3              |
| chr11 | 66620738 | 66620935 | PC       | NM_022172    | 21 | 20 | 11       | 145            | 114  | 5114   | 25,83  | 80,7                    |
| chr11 | 66631271 | 66631477 | PC       | NM_022172    | 21 | 20 | 10       | 183            | 84   | 4000   | 19,32  | 85,8                    |
| chr11 | 66633713 | 66633889 | PC       | NM_022172    | 21 | 20 | 9        | 163            | 7    | 265    | 1,5    | 66,3                    |
| chr11 | 66636257 | 66636430 | PC       | NM_022172    | 21 | 20 | 8        | 119            | 62   | 2627   | 15,1   | 95,8                    |
| chr11 | 66637823 | 66638008 | PC       | NM_022172    | 21 | 20 | 7        | 152            | 277  | 12030  | 64,68  | 67,1                    |
| chr11 | 66638239 | 66639005 | PC       | NM_022172    | 21 | 20 | 6,5,4    | 118.146.166    | 1046 | 48912  | 63,77  | 100.0,100.0,100.0       |
| chr11 | 66639163 | 66639695 | PC       | NM_022172    | 21 | 20 | 3,2      | 185.136        | 259  | 11465  | 21,51  | 97.3,100.0              |
| chr11 | 67374322 | 67374593 | NDUFV1   | NM_007103    | 10 | 10 | 1        | 72             | 83   | 3918   | 14,4   | 100                     |
| chr11 | 67375774 | 67376134 | NDUFV1   | NM_007103    | 10 | 10 | 2,3      | 83.171         | 1200 | 54751  | 151,66 | 100.0,65.5              |
| chr11 | 67376980 | 67377174 | NDUFV1   | NM_007103    | 10 | 10 | 4        | 184            | 91   | 3758   | 19,27  | 69                      |
| chr11 | 67377776 | 67377991 | NDUFV1   | NM_007103    | 10 | 10 | 5        | 190            | 486  | 21755  | 100,72 | 73,7                    |
| chr11 | 67378480 | 67378677 | NDUFV1   | NM_007103    | 10 | 10 | 6        | 213            | 467  | 19216  | 97,05  | 93                      |
| chr11 | 67378871 | 67379056 | NDUFV1   | NM_007103    | 10 | 10 | 7        | 167            | 275  | 12123  | 65,18  | 100                     |
| chr11 | 67379393 | 67379999 | NDUFV1   | NM_007103    | 10 | 10 | 8,9,10   | 82,146,87      | 369  | 16271  | 26,81  | 69.5,100.0,100.0        |

|       |           |           |        |              |    |    |       |           |      |        |        |                  |
|-------|-----------|-----------|--------|--------------|----|----|-------|-----------|------|--------|--------|------------------|
| chr11 | 67799673  | 67799891  | NDUFS8 | NM_002496    | 7  | 6  | 2,3   | 58,51     | 302  | 13285  | 60,66  | 6.9,100.0        |
| chr11 | 67800425  | 67800960  | NDUFS8 | NM_002496    | 7  | 6  | 4,5   | 90.173    | 578  | 27233  | 50,81  | 61.1,100.0       |
| chr11 | 67803694  | 67804137  | NDUFS8 | NM_002496    | 7  | 6  | 6,7   | 129.132   | 1202 | 52660  | 118,6  | 100.0,100.0      |
| chr11 | 71146030  | 71146944  | DHCR7  | NM_001163817 | 9  | 7  | 9     | 465       | 1298 | 62007  | 67,77  | 100              |
| chr11 | 71148865  | 71149041  | DHCR7  | NM_001163817 | 9  | 7  | 8     | 132       | 622  | 27156  | 153,42 | 94,7             |
| chr11 | 71149995  | 71150180  | DHCR7  | NM_001163817 | 9  | 7  | 7     | 205       | 625  | 26883  | 144,53 | 65,9             |
| chr11 | 71152354  | 71152527  | DHCR7  | NM_001163817 | 9  | 7  | 6     | 214       | 582  | 24317  | 139,75 | 62,1             |
| chr11 | 71153304  | 71153513  | DHCR7  | NM_001163817 | 9  | 7  | 5     | 91        | 674  | 29429  | 140,14 | 100              |
| chr11 | 71155025  | 71155290  | DHCR7  | NM_001163817 | 9  | 7  | 4     | 223       | 522  | 24720  | 92,93  | 100              |
| chr11 | 71155782  | 71155982  | DHCR7  | NM_001163817 | 9  | 7  | 3     | 98        | 932  | 40661  | 202,29 | 83,7             |
| chr11 | 93517596  | 93517846  | MED17  | NM_004268    | 12 | 12 | 1     | 250       | 303  | 13554  | 54     | 66,8             |
| chr11 | 93521097  | 93521478  | MED17  | NM_004268    | 12 | 12 | 2     | 167       | 385  | 17724  | 46,4   | 100              |
| chr11 | 93523691  | 93523959  | MED17  | NM_004268    | 12 | 12 | 3     | 220       | 324  | 15141  | 56,29  | 100              |
| chr11 | 93526900  | 93527242  | MED17  | NM_004268    | 12 | 12 | 4,5   | 137,85    | 418  | 17478  | 50,96  | 95.6,100.0       |
| chr11 | 93528085  | 93528273  | MED17  | NM_004268    | 12 | 12 | 6     | 153       | 445  | 17812  | 94,24  | 92,8             |
| chr11 | 93529597  | 93529800  | MED17  | NM_004268    | 12 | 12 | 7     | 131       | 261  | 11413  | 55,95  | 84               |
| chr11 | 93530662  | 93530850  | MED17  | NM_004268    | 12 | 12 | 8     | 185       | 131  | 5665   | 29,97  | 81,1             |
| chr11 | 93534945  | 93535124  | MED17  | NM_004268    | 12 | 12 | 9     | 138       | 217  | 8548   | 47,49  | 89,9             |
| chr11 | 93540684  | 93540872  | MED17  | NM_004268    | 12 | 12 | 10    | 118       | 487  | 20183  | 106,79 | 100              |
| chr11 | 93542937  | 93543122  | MED17  | NM_004268    | 12 | 12 | 11    | 160       | 2687 | 117985 | 634,33 | 66,2             |
| chr11 | 93544970  | 93545312  | MED17  | NM_004268    | 12 | 12 | 12    | 212       | 717  | 31909  | 93,03  | 100              |
| chr11 | 111656971 | 111657278 | ALG9   | NM_024740    | 16 | 16 | 16    | 124       | 558  | 26235  | 85,18  | 100              |
| chr11 | 111680304 | 111680498 | ALG9   | NM_024740    | 16 | 16 | 15    | 131       | 341  | 14388  | 73,78  | 100              |
| chr11 | 111706927 | 111707097 | ALG9   | NM_024740    | 16 | 16 | 14    | 140       | 45   | 1832   | 10,71  | 70               |
| chr11 | 111708125 | 111708337 | ALG9   | NM_024740    | 16 | 16 | 13    | 138       | 133  | 6016   | 28,24  | 99,3             |
| chr11 | 111708913 | 111709131 | ALG9   | NM_024740    | 16 | 16 | 12    | 151       | 179  | 7520   | 34,34  | 100              |
| chr11 | 111711321 | 111711524 | ALG9   | NM_024740    | 16 | 16 | 11    | 155       | 160  | 7005   | 34,34  | 94,8             |
| chr11 | 111715221 | 111715424 | ALG9   | NM_024740    | 16 | 16 | 10    | 123       | 276  | 12189  | 59,75  | 82,1             |
| chr11 | 111724115 | 111724478 | ALG9   | NM_024740    | 16 | 16 | 9,8   | 106,88    | 510  | 23833  | 65,48  | 88.7,100.0       |
| chr11 | 111728364 | 111728537 | ALG9   | NM_024740    | 16 | 16 | 7     | 136       | 108  | 4866   | 27,97  | 71,3             |
| chr11 | 111731248 | 111731439 | ALG9   | NM_024740    | 16 | 16 | 6     | 89        | 126  | 5397   | 28,11  | 100              |
| chr11 | 111735781 | 111735978 | ALG9   | NM_024740    | 16 | 16 | 5     | 71        | 76   | 3514   | 17,75  | 100              |
| chr11 | 111739363 | 111739542 | ALG9   | NM_024740    | 16 | 16 | 4     | 135       | 203  | 8331   | 46,28  | 71,9             |
| chr11 | 111740878 | 111741051 | ALG9   | NM_024740    | 16 | 16 | 3     | 139       | 197  | 7532   | 43,29  | 69,8             |
| chr11 | 111742112 | 111742312 | ALG9   | NM_024740    | 16 | 16 | 2,1   | 71,60     | 148  | 5930   | 29,5   | 47.9,100.0       |
| chr11 | 118967629 | 118968226 | DPAGT1 | NM_001382    | 9  | 9  | 9,8,7 | 66,156,88 | 1434 | 66600  | 111,37 | 100.0,100.0,60.2 |
| chr11 | 118968513 | 118968737 | DPAGT1 | NM_001382    | 9  | 9  | 6     | 189       | 307  | 13028  | 57,9   | 91,5             |
| chr11 | 118969113 | 118969325 | DPAGT1 | NM_001382    | 9  | 9  | 5     | 85        | 112  | 4947   | 23,23  | 100              |
| chr11 | 118970878 | 118971084 | DPAGT1 | NM_001382    | 9  | 9  | 4     | 147       | 200  | 8043   | 38,86  | 76,9             |
| chr11 | 118971333 | 118971844 | DPAGT1 | NM_001382    | 9  | 9  | 3,2   | 214.121   | 1652 | 79400  | 155,08 | 100.0,96.7       |
| chr11 | 118972250 | 118972432 | DPAGT1 | NM_001382    | 9  | 9  | 1     | 161       | 50   | 1877   | 10,26  | 72               |
| chr11 | 119535367 | 119536023 | PVRL1  | NM_002855    | 6  | 6  | 6     | 551       | 682  | 32054  | 48,79  | 100              |
| chr11 | 119545865 | 119546071 | PVRL1  | NM_002855    | 6  | 6  | 5     | 152       | 596  | 27271  | 131,74 | 100              |
| chr11 | 119547839 | 119548030 | PVRL1  | NM_002855    | 6  | 6  | 4     | 118       | 172  | 8123   | 42,31  | 77,1             |
| chr11 | 119548262 | 119548619 | PVRL1  | NM_002855    | 6  | 6  | 3     | 303       | 1050 | 48998  | 136,87 | 100              |
| chr11 | 119549089 | 119549449 | PVRL1  | NM_002855    | 6  | 6  | 2     | 351       | 357  | 16320  | 45,21  | 92,6             |
| chr11 | 119599143 | 119599423 | PVRL1  | NM_002855    | 6  | 6  | 1     | 79        | 112  | 4632   | 16,48  | 100              |
| chr11 | 121174020 | 121174285 | SC5DL  | NM_006918    | 5  | 4  | 2     | 210       | 205  | 8480   | 31,88  | 95,7             |
| chr11 | 121175059 | 121175256 | SC5DL  | NM_006918    | 5  | 4  | 3     | 133       | 498  | 23053  | 116,43 | 100              |
| chr11 | 121177126 | 121177403 | SC5DL  | NM_006918    | 5  | 4  | 4     | 101       | 528  | 23317  | 83,87  | 69,3             |
| chr11 | 121177814 | 121178358 | SC5DL  | NM_006918    | 5  | 4  | 5     | 456       | 1130 | 53913  | 98,92  | 89,5             |
| chr11 | 125830757 | 125831040 | CDON   | NM_001243597 | 20 | 19 | 20    | 164       | 654  | 29776  | 104,85 | 100              |
| chr11 | 125831494 | 125831830 | CDON   | NM_001243597 | 20 | 19 | 19    | 344       | 779  | 35081  | 104,1  | 81,7             |
| chr11 | 125848186 | 125848404 | CDON   | NM_001243597 | 20 | 19 | 18    | 80        | 180  | 7694   | 35,13  | 100              |
| chr11 | 125850964 | 125851247 | CDON   | NM_001243597 | 20 | 19 | 17    | 281       | 1070 | 49352  | 173,77 | 92,9             |
| chr11 | 125853809 | 125854074 | CDON   | NM_001243597 | 20 | 19 | 16    | 222       | 857  | 38006  | 142,88 | 81,1             |
| chr11 | 125859501 | 125859680 | CDON   | NM_001243597 | 20 | 19 | 15    | 123       | 388  | 17109  | 95,05  | 100              |

|       |           |           |         |              |    |    |     |        |      |        |        |            |
|-------|-----------|-----------|---------|--------------|----|----|-----|--------|------|--------|--------|------------|
| chr11 | 125864206 | 125864391 | CDON    | NM_001243597 | 20 | 19 | 14  | 106    | 105  | 4547   | 24,45  | 74,5       |
| chr11 | 125864693 | 125864890 | CDON    | NM_001243597 | 20 | 19 | 13  | 182    | 417  | 17504  | 88,4   | 68,7       |
| chr11 | 125867043 | 125867228 | CDON    | NM_001243597 | 20 | 19 | 12  | 204    | 350  | 15478  | 83,22  | 62,3       |
| chr11 | 125871648 | 125871830 | CDON    | NM_001243597 | 20 | 19 | 11  | 132    | 148  | 6087   | 33,26  | 74,2       |
| chr11 | 125873722 | 125874085 | CDON    | NM_001243597 | 20 | 19 | 10  | 175    | 730  | 35068  | 96,34  | 100        |
| chr11 | 125875694 | 125876048 | CDON    | NM_001243597 | 20 | 19 | 9   | 299    | 897  | 41101  | 115,78 | 86,6       |
| chr11 | 125880265 | 125880619 | CDON    | NM_001243597 | 20 | 19 | 8   | 354    | 1312 | 61524  | 173,31 | 91,8       |
| chr11 | 125885012 | 125885446 | CDON    | NM_001243597 | 20 | 19 | 7   | 270    | 3312 | 160640 | 369,29 | 100        |
| chr11 | 125887037 | 125887326 | CDON    | NM_001243597 | 20 | 19 | 6   | 288    | 614  | 26952  | 92,94  | 81,2       |
| chr11 | 125888268 | 125888441 | CDON    | NM_001243597 | 20 | 19 | 5   | 144    | 322  | 12916  | 74,23  | 70,1       |
| chr11 | 125889429 | 125889549 | CDON    | NM_001243597 | 20 | 19 | 4   | 147    | 251  | 9566   | 79,06  | 24,5       |
| chr11 | 125891213 | 125891487 | CDON    | NM_001243597 | 20 | 19 | 3   | 273    | 183  | 8127   | 29,55  | 74,4       |
| chr11 | 125893247 | 125893477 | CDON    | NM_001243597 | 20 | 19 | 2   | 76     | 376  | 15421  | 66,76  | 100        |
| chr11 | 126294368 | 126294891 | KIRREL3 | NM_032531    | 17 | 17 | 17  | 444    | 409  | 19007  | 36,27  | 93,9       |
| chr11 | 126295445 | 126295645 | KIRREL3 | NM_032531    | 17 | 17 | 16  | 87     | 268  | 11254  | 55,99  | 100        |
| chr11 | 126299103 | 126299273 | KIRREL3 | NM_032531    | 17 | 17 | 15  | 110    | 531  | 22842  | 133,58 | 73,6       |
| chr11 | 126301156 | 126301368 | KIRREL3 | NM_032531    | 17 | 17 | 14  | 108    | 1033 | 42148  | 197,88 | 50,9       |
| chr11 | 126305092 | 126305268 | KIRREL3 | NM_032531    | 17 | 17 | 13  | 36     | 452  | 19182  | 108,37 | 100        |
| chr11 | 126306656 | 126306841 | KIRREL3 | NM_032531    | 17 | 17 | 12  | 199    | 124  | 5431   | 29,2   | 68,3       |
| chr11 | 126310020 | 126310481 | KIRREL3 | NM_032531    | 17 | 17 | 11  | 101    | 866  | 40001  | 86,58  | 100        |
| chr11 | 126314911 | 126315087 | KIRREL3 | NM_032531    | 17 | 17 | 10  | 127    | 93   | 3700   | 20,9   | 70,9       |
| chr11 | 126316692 | 126316871 | KIRREL3 | NM_032531    | 17 | 17 | 9   | 128    | 542  | 22843  | 126,91 | 70,3       |
| chr11 | 126318805 | 126319017 | KIRREL3 | NM_032531    | 17 | 17 | 8   | 149    | 543  | 23436  | 110,03 | 76,5       |
| chr11 | 126326271 | 126326450 | KIRREL3 | NM_032531    | 17 | 17 | 7   | 106    | 202  | 8573   | 47,63  | 74,5       |
| chr11 | 126333056 | 126333250 | KIRREL3 | NM_032531    | 17 | 17 | 6   | 151    | 477  | 20723  | 106,27 | 97,4       |
| chr11 | 126343161 | 126343343 | KIRREL3 | NM_032531    | 17 | 17 | 5   | 158    | 132  | 5984   | 32,7   | 88,6       |
| chr11 | 126391253 | 126391444 | KIRREL3 | NM_032531    | 17 | 17 | 4   | 150    | 150  | 6397   | 33,32  | 71,3       |
| chr11 | 126396410 | 126396613 | KIRREL3 | NM_032531    | 17 | 17 | 3   | 150    | 408  | 17306  | 84,83  | 100        |
| chr11 | 126432732 | 126432953 | KIRREL3 | NM_032531    | 17 | 17 | 2   | 78     | 483  | 20951  | 94,37  | 97,4       |
| chr11 | 126870292 | 126870468 | KIRREL3 | NM_032531    | 17 | 17 | 1   | 55     | 384  | 16574  | 93,64  | 100        |
| chr11 | 133938802 | 133939032 | JAM3    | NM_032801    | 9  | 9  | 1   | 76     | 26   | 1028   | 4,45   | 71,1       |
| chr11 | 134009618 | 134009821 | JAM3    | NM_032801    | 9  | 9  | 2   | 66     | 138  | 5907   | 28,96  | 100        |
| chr11 | 134010541 | 134010732 | JAM3    | NM_032801    | 9  | 9  | 3   | 114    | 269  | 9872   | 51,42  | 100        |
| chr11 | 134014075 | 134014287 | JAM3    | NM_032801    | 9  | 9  | 4   | 153    | 584  | 25941  | 121,79 | 99,3       |
| chr11 | 134014718 | 134014992 | JAM3    | NM_032801    | 9  | 9  | 5   | 203    | 757  | 35408  | 128,76 | 84,7       |
| chr11 | 134015811 | 134016023 | JAM3    | NM_032801    | 9  | 9  | 6   | 100    | 63   | 2909   | 13,66  | 100        |
| chr11 | 134018473 | 134018732 | JAM3    | NM_032801    | 9  | 9  | 7,8 | 130,55 | 492  | 21566  | 82,95  | 76,2,100.0 |
| chr12 | 2162603   | 2162788   | CACNA1C | NM_199460    | 50 | 50 | 1   | 49     | 186  | 8150   | 43,82  | 100        |
| chr12 | 2224295   | 2224673   | CACNA1C | NM_199460    | 50 | 50 | 2   | 322    | 401  | 17813  | 47     | 88,2       |
| chr12 | 2229427   | 2229618   | CACNA1C | NM_199460    | 50 | 50 | 3   | 106    | 765  | 32982  | 171,78 | 100        |
| chr12 | 2558035   | 2558238   | CACNA1C | NM_199460    | 50 | 50 | 4   | 140    | 142  | 6284   | 30,8   | 69,3       |
| chr12 | 2566653   | 2566826   | CACNA1C | NM_199460    | 50 | 50 | 5   | 140    | 381  | 16928  | 97,29  | 67,1       |
| chr12 | 2595239   | 2595436   | CACNA1C | NM_199460    | 50 | 50 | 6   | 159    | 720  | 32242  | 162,84 | 100        |
| chr12 | 2602278   | 2602487   | CACNA1C | NM_199460    | 50 | 50 | 7   | 197    | 757  | 30847  | 146,89 | 67         |
| chr12 | 2614030   | 2614215   | CACNA1C | NM_199460    | 50 | 50 | 8   | 104    | 163  | 6870   | 36,94  | 78,8       |
| chr12 | 2622020   | 2622226   | CACNA1C | NM_199460    | 50 | 50 | 9   | 173    | 240  | 10785  | 52,1   | 75,7       |
| chr12 | 2659032   | 2659208   | CACNA1C | NM_199460    | 50 | 50 | 10  | 91     | 390  | 16971  | 95,88  | 100        |
| chr12 | 2666011   | 2666184   | CACNA1C | NM_199460    | 50 | 50 | 11  | 27     | 374  | 16021  | 92,07  | 100        |
| chr12 | 2675582   | 2675758   | CACNA1C | NM_199460    | 50 | 50 | 12  | 161    | 223  | 9445   | 53,36  | 100        |
| chr12 | 2676631   | 2676926   | CACNA1C | NM_199460    | 50 | 50 | 13  | 226    | 599  | 25388  | 85,77  | 85         |
| chr12 | 2690821   | 2691006   | CACNA1C | NM_199460    | 50 | 50 | 14  | 208    | 321  | 13329  | 71,66  | 68,8       |
| chr12 | 2691872   | 2692093   | CACNA1C | NM_199460    | 50 | 50 | 15  | 121    | 395  | 16455  | 74,12  | 87,6       |
| chr12 | 2693577   | 2693762   | CACNA1C | NM_199460    | 50 | 50 | 16  | 115    | 766  | 32955  | 177,18 | 81,7       |
| chr12 | 2694453   | 2694632   | CACNA1C | NM_199460    | 50 | 50 | 17  | 121    | 157  | 6347   | 35,26  | 75,2       |
| chr12 | 2694862   | 2695065   | CACNA1C | NM_199460    | 50 | 50 | 18  | 70     | 289  | 12244  | 60,02  | 92,9       |
| chr12 | 2702272   | 2702469   | CACNA1C | NM_199460    | 50 | 50 | 19  | 133    | 226  | 9523   | 48,1   | 68,4       |
| chr12 | 2705062   | 2705351   | CACNA1C | NM_199460    | 50 | 50 | 20  | 130    | 1668 | 71933  | 248,04 | 83,1       |

|       |          |          |         |              |    |    |       |         |      |        |        |            |
|-------|----------|----------|---------|--------------|----|----|-------|---------|------|--------|--------|------------|
| chr12 | 2706376  | 2706653  | CACNA1C | NM_199460    | 50 | 50 | 21,22 | 60,60   | 886  | 39626  | 142,54 | 100,0,85,0 |
| chr12 | 2710954  | 2711136  | CACNA1C | NM_199460    | 50 | 50 | 23    | 107     | 1061 | 48343  | 264,17 | 100        |
| chr12 | 2714120  | 2714323  | CACNA1C | NM_199460    | 50 | 50 | 24    | 88      | 1497 | 62064  | 304,24 | 87,5       |
| chr12 | 2714842  | 2715066  | CACNA1C | NM_199460    | 50 | 50 | 25    | 108     | 867  | 37997  | 168,88 | 100        |
| chr12 | 2715645  | 2715833  | CACNA1C | NM_199460    | 50 | 50 | 26    | 53      | 586  | 23719  | 125,5  | 100        |
| chr12 | 2716122  | 2716313  | CACNA1C | NM_199460    | 50 | 50 | 27    | 147     | 362  | 15990  | 83,28  | 100        |
| chr12 | 2717751  | 2717930  | CACNA1C | NM_199460    | 50 | 50 | 28    | 202     | 316  | 14561  | 80,89  | 63,4       |
| chr12 | 2719751  | 2719933  | CACNA1C | NM_199460    | 50 | 50 | 29    | 159     | 301  | 12422  | 67,88  | 72,3       |
| chr12 | 2721101  | 2721286  | CACNA1C | NM_199460    | 50 | 50 | 30    | 111     | 366  | 14964  | 80,45  | 71,2       |
| chr12 | 2742786  | 2743001  | CACNA1C | NM_199460    | 50 | 50 | 31    | 84      | 1239 | 54427  | 251,98 | 100        |
| chr12 | 2743358  | 2743576  | CACNA1C | NM_199460    | 50 | 50 | 32    | 84      | 249  | 10214  | 46,64  | 100        |
| chr12 | 2757505  | 2757684  | CACNA1C | NM_199460    | 50 | 50 | 33    | 33      | 1067 | 44630  | 247,94 | 100        |
| chr12 | 2760724  | 2760930  | CACNA1C | NM_199460    | 50 | 50 | 34    | 129     | 778  | 33745  | 163,02 | 96,9       |
| chr12 | 2762980  | 2763207  | CACNA1C | NM_199460    | 50 | 50 | 35    | 66      | 968  | 40024  | 175,54 | 100        |
| chr12 | 2764206  | 2764385  | CACNA1C | NM_199460    | 50 | 50 | 36    | 92      | 1852 | 78551  | 436,39 | 79,3       |
| chr12 | 2773903  | 2774112  | CACNA1C | NM_199460    | 50 | 50 | 37    | 166     | 282  | 11277  | 53,7   | 73,5       |
| chr12 | 2774760  | 2774954  | CACNA1C | NM_199460    | 50 | 50 | 38    | 128     | 673  | 29419  | 150,87 | 89,8       |
| chr12 | 2775853  | 2776065  | CACNA1C | NM_199460    | 50 | 50 | 39    | 97      | 202  | 8702   | 40,85  | 99         |
| chr12 | 2778109  | 2778309  | CACNA1C | NM_199460    | 50 | 50 | 40    | 103     | 177  | 7502   | 37,32  | 90,3       |
| chr12 | 2783559  | 2783777  | CACNA1C | NM_199460    | 50 | 50 | 41    | 102     | 108  | 4552   | 20,79  | 69,6       |
| chr12 | 2786153  | 2786356  | CACNA1C | NM_199460    | 50 | 50 | 42    | 128     | 558  | 22579  | 110,68 | 75,8       |
| chr12 | 2786910  | 2787092  | CACNA1C | NM_199460    | 50 | 50 | 43    | 135     | 541  | 21088  | 115,23 | 91,9       |
| chr12 | 2788536  | 2788893  | CACNA1C | NM_199460    | 50 | 50 | 44    | 353     | 713  | 31419  | 87,76  | 80,5       |
| chr12 | 2791004  | 2791192  | CACNA1C | NM_199460    | 50 | 50 | 45    | 105     | 246  | 10257  | 54,27  | 73,3       |
| chr12 | 2791754  | 2791948  | CACNA1C | NM_199460    | 50 | 50 | 46    | 129     | 289  | 12200  | 62,56  | 70,5       |
| chr12 | 2795327  | 2795557  | CACNA1C | NM_199460    | 50 | 50 | 48    | 104     | 336  | 14075  | 60,93  | 100        |
| chr12 | 2797538  | 2797886  | CACNA1C | NM_199460    | 50 | 50 | 49    | 333     | 439  | 20144  | 57,72  | 82,3       |
| chr12 | 2800129  | 2800492  | CACNA1C | NM_199460    | 50 | 50 | 50    | 300     | 257  | 10804  | 29,68  | 79         |
| chr12 | 7342892  | 7343086  | PEX5    | NM_001131023 | 16 | 15 | 2     | 192     | 75   | 3362   | 17,24  | 58,9       |
| chr12 | 7343467  | 7343646  | PEX5    | NM_001131023 | 16 | 15 | 3     | 36      | 465  | 19766  | 109,81 | 100        |
| chr12 | 7343862  | 7344035  | PEX5    | NM_001131023 | 16 | 15 | 4     | 133     | 567  | 23852  | 137,08 | 69,9       |
| chr12 | 7344205  | 7344384  | PEX5    | NM_001131023 | 16 | 15 | 5     | 132     | 479  | 20668  | 114,82 | 69,7       |
| chr12 | 7351488  | 7351685  | PEX5    | NM_001131023 | 16 | 15 | 6     | 103     | 568  | 23820  | 120,3  | 76,7       |
| chr12 | 7354366  | 7354566  | PEX5    | NM_001131023 | 16 | 15 | 7     | 91      | 199  | 7491   | 37,27  | 79,1       |
| chr12 | 7354857  | 7355051  | PEX5    | NM_001131023 | 16 | 15 | 8     | 111     | 314  | 13227  | 67,83  | 82         |
| chr12 | 7355084  | 7355281  | PEX5    | NM_001131023 | 16 | 15 | 9     | 93      | 442  | 17720  | 89,49  | 79,6       |
| chr12 | 7356063  | 7356233  | PEX5    | NM_001131023 | 16 | 15 | 10    | 120     | 575  | 23091  | 135,04 | 70,8       |
| chr12 | 7360163  | 7360351  | PEX5    | NM_001131023 | 16 | 15 | 11    | 144     | 288  | 12444  | 65,84  | 67,4       |
| chr12 | 7360615  | 7360806  | PEX5    | NM_001131023 | 16 | 15 | 12    | 71      | 770  | 33866  | 176,39 | 87,3       |
| chr12 | 7360995  | 7361183  | PEX5    | NM_001131023 | 16 | 15 | 13    | 213     | 338  | 13901  | 73,55  | 61,5       |
| chr12 | 7361649  | 7361831  | PEX5    | NM_001131023 | 16 | 15 | 14    | 166     | 319  | 14345  | 78,39  | 71,1       |
| chr12 | 7362218  | 7362809  | PEX5    | NM_001131023 | 16 | 15 | 15,16 | 158,202 | 2442 | 114337 | 193,14 | 100,0,95,0 |
| chr12 | 13715674 | 13717539 | GRIN2B  | NM_000834    | 13 | 12 | 13    | 1857    | 7457 | 355719 | 190,63 | 98,2       |
| chr12 | 13719931 | 13720232 | GRIN2B  | NM_000834    | 13 | 12 | 12    | 239     | 652  | 27671  | 91,63  | 100        |
| chr12 | 13722814 | 13723023 | GRIN2B  | NM_000834    | 13 | 12 | 11    | 188     | 485  | 19303  | 91,92  | 73,4       |
| chr12 | 13724648 | 13724848 | GRIN2B  | NM_000834    | 13 | 12 | 10    | 161     | 397  | 17525  | 87,19  | 68,9       |
| chr12 | 13761442 | 13761737 | GRIN2B  | NM_000834    | 13 | 12 | 9     | 230     | 755  | 32613  | 110,18 | 87,4       |
| chr12 | 13764681 | 13764866 | GRIN2B  | NM_000834    | 13 | 12 | 8     | 126     | 473  | 20535  | 110,4  | 82,5       |
| chr12 | 13767973 | 13768158 | GRIN2B  | NM_000834    | 13 | 12 | 7     | 154     | 640  | 24508  | 131,76 | 72,1       |
| chr12 | 13768412 | 13768606 | GRIN2B  | NM_000834    | 13 | 12 | 6     | 172     | 640  | 28804  | 147,71 | 100        |
| chr12 | 13769455 | 13769664 | GRIN2B  | NM_000834    | 13 | 12 | 5     | 203     | 1207 | 52084  | 248,02 | 67,5       |
| chr12 | 13828617 | 13828811 | GRIN2B  | NM_000834    | 13 | 12 | 4     | 115     | 493  | 21570  | 110,62 | 100        |
| chr12 | 13906267 | 13906885 | GRIN2B  | NM_000834    | 13 | 12 | 3     | 599     | 1089 | 52117  | 84,2   | 97,3       |
| chr12 | 14018781 | 14019221 | GRIN2B  | NM_000834    | 13 | 12 | 2     | 411     | 1500 | 68696  | 155,77 | 88,1       |
| chr12 | 21953964 | 21954173 | ABCC9   | NM_020297    | 38 | 38 | 38    | 138     | 672  | 29921  | 142,48 | 100        |
| chr12 | 21958907 | 21959137 | ABCC9   | NM_020297    | 38 | 38 | 37    | 63      | 366  | 14656  | 63,45  | 100        |
| chr12 | 21960267 | 21960470 | ABCC9   | NM_020297    | 38 | 38 | 36    | 134     | 891  | 37513  | 183,89 | 100        |

|       |          |          |       |           |    |    |                         |                                |       |        |        |                                                |
|-------|----------|----------|-------|-----------|----|----|-------------------------|--------------------------------|-------|--------|--------|------------------------------------------------|
| chr12 | 21962743 | 21962925 | ABCC9 | NM_020297 | 38 | 38 | 35                      | 104                            | 402   | 17521  | 95,74  | 100                                            |
| chr12 | 21964936 | 21965121 | ABCC9 | NM_020297 | 38 | 38 | 34                      | 109                            | 293   | 13306  | 71,54  | 100                                            |
| chr12 | 21967552 | 21967743 | ABCC9 | NM_020297 | 38 | 38 | 33                      | 79                             | 285   | 13186  | 68,68  | 100                                            |
| chr12 | 21968691 | 21968906 | ABCC9 | NM_020297 | 38 | 38 | 32                      | 131                            | 475   | 20686  | 95,77  | 100                                            |
| chr12 | 21970080 | 21970274 | ABCC9 | NM_020297 | 38 | 38 | 31                      | 121                            | 660   | 29661  | 152,11 | 100                                            |
| chr12 | 21971040 | 21971231 | ABCC9 | NM_020297 | 38 | 38 | 30                      | 102                            | 533   | 24433  | 127,26 | 100                                            |
| chr12 | 21981908 | 21982102 | ABCC9 | NM_020297 | 38 | 38 | 29                      | 103                            | 303   | 12982  | 66,57  | 84,5                                           |
| chr12 | 21990972 | 21991193 | ABCC9 | NM_020297 | 38 | 38 | 28                      | 93                             | 268   | 11957  | 53,86  | 100                                            |
| chr12 | 21995175 | 21995357 | ABCC9 | NM_020297 | 38 | 38 | 27                      | 158                            | 171   | 7299   | 39,89  | 69,6                                           |
| chr12 | 21997387 | 21997581 | ABCC9 | NM_020297 | 38 | 38 | 26                      | 70                             | 200   | 8506   | 43,62  | 100                                            |
| chr12 | 21997680 | 21997886 | ABCC9 | NM_020297 | 38 | 38 | 25                      | 149                            | 323   | 14359  | 69,37  | 100                                            |
| chr12 | 21998511 | 21998791 | ABCC9 | NM_020297 | 38 | 38 | 24                      | 230                            | 1173  | 52881  | 188,19 | 100                                            |
| chr12 | 22001049 | 22001258 | ABCC9 | NM_020297 | 38 | 38 | 23                      | 97                             | 492   | 21185  | 100,88 | 100                                            |
| chr12 | 22005050 | 22005487 | ABCC9 | NM_020297 | 38 | 38 | 22,21                   | 126.138                        | 1272  | 59523  | 135,9  | 84,9,100.0                                     |
| chr12 | 22012459 | 22012674 | ABCC9 | NM_020297 | 38 | 38 | 20                      | 81                             | 572   | 25065  | 116,04 | 100                                            |
| chr12 | 22013876 | 22014073 | ABCC9 | NM_020297 | 38 | 38 | 19                      | 85                             | 485   | 20866  | 105,38 | 100                                            |
| chr12 | 22015768 | 22015992 | ABCC9 | NM_020297 | 38 | 38 | 18                      | 102                            | 528   | 24099  | 107,11 | 100                                            |
| chr12 | 22017216 | 22017428 | ABCC9 | NM_020297 | 38 | 38 | 17                      | 39                             | 123   | 5544   | 26,03  | 100                                            |
| chr12 | 22025496 | 22025723 | ABCC9 | NM_020297 | 38 | 38 | 16                      | 106                            | 378   | 16827  | 73,8   | 100                                            |
| chr12 | 22028526 | 22028708 | ABCC9 | NM_020297 | 38 | 38 | 15                      | 73                             | 330   | 13328  | 72,83  | 100                                            |
| chr12 | 22035653 | 22035856 | ABCC9 | NM_020297 | 38 | 38 | 14                      | 108                            | 533   | 23033  | 112,91 | 100                                            |
| chr12 | 22040689 | 22040892 | ABCC9 | NM_020297 | 38 | 38 | 13                      | 109                            | 269   | 10890  | 53,38  | 100                                            |
| chr12 | 22046924 | 22047148 | ABCC9 | NM_020297 | 38 | 38 | 12                      | 143                            | 100   | 4462   | 19,83  | 100                                            |
| chr12 | 22048059 | 22048259 | ABCC9 | NM_020297 | 38 | 38 | 11                      | 41                             | 463   | 19038  | 94,72  | 100                                            |
| chr12 | 22058980 | 22059177 | ABCC9 | NM_020297 | 38 | 38 | 10                      | 163                            | 632   | 26862  | 135,67 | 72,4                                           |
| chr12 | 22060977 | 22061168 | ABCC9 | NM_020297 | 38 | 38 | 9                       | 135                            | 314   | 12680  | 66,04  | 100                                            |
| chr12 | 22063068 | 22063256 | ABCC9 | NM_020297 | 38 | 38 | 8                       | 156                            | 440   | 19534  | 103,35 | 100                                            |
| chr12 | 22063705 | 22063905 | ABCC9 | NM_020297 | 38 | 38 | 7                       | 153                            | 313   | 13059  | 64,97  | 95,4                                           |
| chr12 | 22065808 | 22066017 | ABCC9 | NM_020297 | 38 | 38 | 6                       | 195                            | 191   | 8598   | 40,94  | 99                                             |
| chr12 | 22068537 | 22068829 | ABCC9 | NM_020297 | 38 | 38 | 5                       | 243                            | 538   | 24724  | 84,38  | 93,8                                           |
| chr12 | 22069811 | 22070020 | ABCC9 | NM_020297 | 38 | 38 | 4                       | 167                            | 386   | 16246  | 77,36  | 89,8                                           |
| chr12 | 22078872 | 22079081 | ABCC9 | NM_020297 | 38 | 38 | 3                       | 122                            | 398   | 17388  | 82,8   | 100                                            |
| chr12 | 22086692 | 22086889 | ABCC9 | NM_020297 | 38 | 38 | 2                       | 142                            | 467   | 20268  | 102,36 | 100                                            |
| chr12 | 22089437 | 22089622 | ABCC9 | NM_020297 | 38 | 38 | 1                       | 142                            | 132   | 5265   | 28,31  | 100                                            |
| chr12 | 25362728 | 25362931 | KRAS  | NM_033360 | 6  | 4  | 6                       | 4666                           | 189   | 8122   | 39,81  | 2,5                                            |
| chr12 | 25368397 | 25368579 | KRAS  | NM_033360 | 6  | 4  | 5                       | 120                            | 361   | 16126  | 88,12  | 81,7                                           |
| chr12 | 25378482 | 25378652 | KRAS  | NM_033360 | 6  | 4  | 4                       | 160                            | 392   | 15737  | 92,03  | 65,6                                           |
| chr12 | 25380090 | 25380281 | KRAS  | NM_033360 | 6  | 4  | 3                       | 179                            | 251   | 11102  | 57,82  | 63,7                                           |
| chr12 | 25398237 | 25398416 | KRAS  | NM_033360 | 6  | 4  | 2                       | 111                            | 369   | 14657  | 81,43  | 73,9                                           |
| chr12 | 49415443 | 49416197 | MLL2  | NM_003482 | 54 | 54 | 54,53,52                | 93,109,74                      | 3019  | 145804 | 193,12 | 100.0,100.0,100.0                              |
| chr12 | 49416359 | 49416630 | MLL2  | NM_003482 | 54 | 54 | 51                      | 286                            | 1516  | 67445  | 247,96 | 90,2                                           |
| chr12 | 49418349 | 49418694 | MLL2  | NM_003482 | 54 | 54 | 50,49                   | 131.137                        | 683   | 30961  | 89,48  | 100.0,74.5                                     |
| chr12 | 49419882 | 49421060 | MLL2  | NM_003482 | 54 | 54 | 48                      | 1141                           | 2711  | 130019 | 110,28 | 96,1                                           |
| chr12 | 49421544 | 49421919 | MLL2  | NM_003482 | 54 | 54 | 47,46                   | 128.133                        | 2465  | 112941 | 300,38 | 100.0,96.2                                     |
| chr12 | 49422654 | 49423349 | MLL2  | NM_003482 | 54 | 54 | 45,44,43                | 131,176,76                     | 1540  | 72401  | 104,02 | 67.2,100.0,100.0                               |
| chr12 | 49424010 | 49428708 | MLL2  | NM_003482 | 54 | 54 | 42,41,40,39,38,37,36,35 | 160,168,141,2790,233,67,85,124 | 13398 | 639887 | 136,18 | 100.0,100.0,100.0,100.0,100.0,100.0,100.0,91.9 |
| chr12 | 49430848 | 49432722 | MLL2  | NM_003482 | 54 | 54 | 34                      | 1865                           | 3361  | 161895 | 86,34  | 97,3                                           |
| chr12 | 49432973 | 49435505 | MLL2  | NM_003482 | 54 | 54 | 33,32,31,30             | 137,183,1812,51                | 1584  | 73913  | 29,18  | 100.0,100.0,100.0,100.0                        |
| chr12 | 49435631 | 49436065 | MLL2  | NM_003482 | 54 | 54 | 29,28                   | 74.242                         | 2474  | 116076 | 266,84 | 100.0,80.2                                     |
| chr12 | 49436384 | 49436735 | MLL2  | NM_003482 | 54 | 54 | 27,26                   | 85.138                         | 846   | 37715  | 107,14 | 52.9,100.0                                     |
| chr12 | 49436785 | 49437160 | MLL2  | NM_003482 | 54 | 54 | 25,24                   | 111,66                         | 889   | 39910  | 106,14 | 100.0,22.7                                     |
| chr12 | 49437373 | 49437745 | MLL2  | NM_003482 | 54 | 54 | 23,22                   | 148.131                        | 1339  | 56829  | 152,36 | 100.0,72.5                                     |
| chr12 | 49438020 | 49438392 | MLL2  | NM_003482 | 54 | 54 | 21,20                   | 105.120                        | 1145  | 49900  | 133,78 | 64.8,100.0                                     |
| chr12 | 49438562 | 49438839 | MLL2  | NM_003482 | 54 | 54 | 19                      | 222                            | 668   | 29086  | 104,63 | 84,2                                           |
| chr12 | 49439649 | 49440178 | MLL2  | NM_003482 | 54 | 54 | 18,17,16                | 48.110.165                     | 1994  | 94582  | 178,46 | 100.0,100.0,82.4                               |
| chr12 | 49440360 | 49440563 | MLL2  | NM_003482 | 54 | 54 | 15                      | 182                            | 280   | 11605  | 56,89  | 94,5                                           |
| chr12 | 49441771 | 49441956 | MLL2  | NM_003482 | 54 | 54 | 14                      | 105                            | 653   | 27194  | 146,2  | 78,1                                           |

|       |          |          |        |           |    |    |         |                 |      |        |        |                        |
|-------|----------|----------|--------|-----------|----|----|---------|-----------------|------|--------|--------|------------------------|
| chr12 | 49442369 | 49442551 | MLL2   | NM_003482 | 54 | 54 | 13      | 111             | 519  | 21068  | 115,13 | 99,1                   |
| chr12 | 49442894 | 49443109 | MLL2   | NM_003482 | 54 | 54 | 12      | 114             | 139  | 6114   | 28,31  | 94,7                   |
| chr12 | 49443512 | 49446583 | MLL2   | NM_003482 | 54 | 54 | 11,10,9 | 11.091.539.146  | 5019 | 229636 | 74,75  | 95.8,100.0,100.0       |
| chr12 | 49446608 | 49447386 | MLL2   | NM_003482 | 54 | 54 | 8,7,6   | 158.115.166     | 4530 | 216149 | 277,47 | 100.0,100.0,77.1       |
| chr12 | 49447792 | 49448896 | MLL2   | NM_003482 | 54 | 54 | 5,4,3,2 | 163.110.224.127 | 3486 | 168988 | 152,93 | 81.0,100.0,100.0,100.0 |
| chr12 | 49448922 | 49449107 | MLL2   | NM_003482 | 54 | 54 | 1       | 49              | 452  | 19625  | 105,51 | 100                    |
| chr12 | 49579731 | 49579851 | TUBA1A | NM_006009 | 4  | 4  | 4       | 981             | 289  | 10827  | 89,48  | 4,4                    |
| chr12 | 49580219 | 49580419 | TUBA1A | NM_006009 | 4  | 4  | 3,2     | 149.223         | 224  | 8562   | 42,6   | 15,4,11,7              |
| chr12 | 49580569 | 49580689 | TUBA1A | NM_006009 | 4  | 4  | 2       | 223             | 57   | 1815   | 15     | 21,5                   |
| chr12 | 49582606 | 49582791 | TUBA1A | NM_006009 | 4  | 4  | 1       | 3               | 359  | 15321  | 82,37  | 100                    |
| chr12 | 50898828 | 50899007 | DIP2B  | NM_173602 | 38 | 38 | 1       | 100             | 2    | 87     | 0,48   | 84                     |
| chr12 | 51019697 | 51019888 | DIP2B  | NM_173602 | 38 | 38 | 2       | 72              | 171  | 7963   | 41,47  | 100                    |
| chr12 | 51034410 | 51034598 | DIP2B  | NM_173602 | 38 | 38 | 3       | 129             | 842  | 34487  | 182,47 | 71,3                   |
| chr12 | 51053885 | 51054070 | DIP2B  | NM_173602 | 38 | 38 | 4       | 126             | 241  | 10200  | 54,84  | 74,6                   |
| chr12 | 51065043 | 51065249 | DIP2B  | NM_173602 | 38 | 38 | 5       | 213             | 687  | 29422  | 142,14 | 65,3                   |
| chr12 | 51068222 | 51068449 | DIP2B  | NM_173602 | 38 | 38 | 6       | 156             | 1109 | 50436  | 221,21 | 100                    |
| chr12 | 51069071 | 51069265 | DIP2B  | NM_173602 | 38 | 38 | 7       | 120             | 399  | 18271  | 93,7   | 100                    |
| chr12 | 51072511 | 51072767 | DIP2B  | NM_173602 | 38 | 38 | 8       | 198             | 921  | 43790  | 170,39 | 75,3                   |
| chr12 | 51074439 | 51074624 | DIP2B  | NM_173602 | 38 | 38 | 9       | 92              | 148  | 5793   | 31,15  | 100                    |
| chr12 | 51076890 | 51077120 | DIP2B  | NM_173602 | 38 | 38 | 10      | 111             | 603  | 25237  | 109,25 | 100                    |
| chr12 | 51079589 | 51079768 | DIP2B  | NM_173602 | 38 | 38 | 11      | 124             | 274  | 12065  | 67,03  | 100                    |
| chr12 | 51080274 | 51080489 | DIP2B  | NM_173602 | 38 | 38 | 12      | 110             | 468  | 20670  | 95,69  | 100                    |
| chr12 | 51084761 | 51084937 | DIP2B  | NM_173602 | 38 | 38 | 13      | 103             | 150  | 6349   | 35,87  | 100                    |
| chr12 | 51086702 | 51086908 | DIP2B  | NM_173602 | 38 | 38 | 14      | 65              | 307  | 12922  | 62,43  | 100                    |
| chr12 | 51089029 | 51089226 | DIP2B  | NM_173602 | 38 | 38 | 15      | 94              | 425  | 19204  | 96,99  | 100                    |
| chr12 | 51089587 | 51089802 | DIP2B  | NM_173602 | 38 | 38 | 16      | 120             | 755  | 33636  | 155,72 | 100                    |
| chr12 | 51090752 | 51090925 | DIP2B  | NM_173602 | 38 | 38 | 17      | 115             | 1100 | 46175  | 265,37 | 71,3                   |
| chr12 | 51092014 | 51092217 | DIP2B  | NM_173602 | 38 | 38 | 18      | 140             | 301  | 13888  | 68,08  | 76,4                   |
| chr12 | 51092804 | 51093025 | DIP2B  | NM_173602 | 38 | 38 | 19      | 137             | 495  | 22121  | 99,64  | 100                    |
| chr12 | 51097865 | 51098077 | DIP2B  | NM_173602 | 38 | 38 | 20      | 81              | 147  | 6384   | 29,97  | 100                    |
| chr12 | 51100284 | 51100469 | DIP2B  | NM_173602 | 38 | 38 | 21      | 128             | 494  | 22225  | 119,49 | 100                    |
| chr12 | 51102139 | 51102324 | DIP2B  | NM_173602 | 38 | 38 | 22      | 115             | 220  | 8928   | 48     | 81,7                   |
| chr12 | 51108151 | 51108351 | DIP2B  | NM_173602 | 38 | 38 | 23      | 202             | 137  | 5600   | 27,86  | 86,1                   |
| chr12 | 51112534 | 51112891 | DIP2B  | NM_173602 | 38 | 38 | 24,25   | 110,81          | 1093 | 50382  | 140,73 | 61.8,100.0             |
| chr12 | 51115089 | 51115274 | DIP2B  | NM_173602 | 38 | 38 | 26      | 124             | 722  | 31662  | 170,23 | 73,4                   |
| chr12 | 51117005 | 51117196 | DIP2B  | NM_173602 | 38 | 38 | 27      | 122             | 633  | 25997  | 135,4  | 83,6                   |
| chr12 | 51118528 | 51118755 | DIP2B  | NM_173602 | 38 | 38 | 28      | 112             | 311  | 13562  | 59,48  | 100                    |
| chr12 | 51121389 | 51121574 | DIP2B  | NM_173602 | 38 | 38 | 29      | 110             | 1314 | 57449  | 308,87 | 80,9                   |
| chr12 | 51122220 | 51122432 | DIP2B  | NM_173602 | 38 | 38 | 30      | 131             | 714  | 30393  | 142,69 | 77,9                   |
| chr12 | 51125090 | 51125296 | DIP2B  | NM_173602 | 38 | 38 | 31      | 169             | 491  | 21352  | 103,15 | 85,8                   |
| chr12 | 51126208 | 51126390 | DIP2B  | NM_173602 | 38 | 38 | 32      | 171             | 517  | 21807  | 119,16 | 65,5                   |
| chr12 | 51127863 | 51128045 | DIP2B  | NM_173602 | 38 | 38 | 33      | 62              | 563  | 23663  | 129,31 | 100                    |
| chr12 | 51128814 | 51129026 | DIP2B  | NM_173602 | 38 | 38 | 34      | 58              | 948  | 42763  | 200,77 | 100                    |
| chr12 | 51130755 | 51130943 | DIP2B  | NM_173602 | 38 | 38 | 35      | 75              | 204  | 8528   | 45,12  | 100                    |
| chr12 | 51133105 | 51133305 | DIP2B  | NM_173602 | 38 | 38 | 36      | 178             | 550  | 22680  | 112,84 | 64                     |
| chr12 | 51135175 | 51135390 | DIP2B  | NM_173602 | 38 | 38 | 37      | 124             | 155  | 6622   | 30,66  | 100                    |
| chr12 | 51138313 | 51138620 | DIP2B  | NM_173602 | 38 | 38 | 38      | 253             | 995  | 44938  | 145,9  | 99,2                   |
| chr12 | 52056614 | 52056885 | SCN8A  | NM_014191 | 27 | 26 | 2       | 276             | 684  | 31196  | 114,69 | 95,7                   |
| chr12 | 52077904 | 52078119 | SCN8A  | NM_014191 | 27 | 26 | 3       | 119             | 274  | 11892  | 55,06  | 100                    |
| chr12 | 52080132 | 52080329 | SCN8A  | NM_014191 | 27 | 26 | 4       | 90              | 183  | 8256   | 41,7   | 100                    |
| chr12 | 52080847 | 52081032 | SCN8A  | NM_014191 | 27 | 26 | 5       | 129             | 775  | 32172  | 172,97 | 100                    |
| chr12 | 52082557 | 52082935 | SCN8A  | NM_014191 | 27 | 26 | 6       | 92              | 898  | 39166  | 103,34 | 83,7                   |
| chr12 | 52093387 | 52093658 | SCN8A  | NM_014191 | 27 | 26 | 7       | 222             | 376  | 17414  | 64,02  | 85,1                   |
| chr12 | 52094856 | 52095059 | SCN8A  | NM_014191 | 27 | 26 | 8       | 64              | 371  | 16176  | 79,29  | 100                    |
| chr12 | 52096596 | 52096793 | SCN8A  | NM_014191 | 27 | 26 | 9       | 142             | 247  | 10737  | 54,23  | 72,5                   |
| chr12 | 52099245 | 52099424 | SCN8A  | NM_014191 | 27 | 26 | 10      | 207             | 90   | 3805   | 21,14  | 78,7                   |
| chr12 | 52100245 | 52100528 | SCN8A  | NM_014191 | 27 | 26 | 11      | 294             | 118  | 5639   | 19,86  | 86,7                   |



|       |          |          |        |           |    |    |    |      |      |        |        |      |
|-------|----------|----------|--------|-----------|----|----|----|------|------|--------|--------|------|
| chr12 | 52115355 | 52115807 | SCN8A  | NM_014191 | 27 | 26 | 12 | 363  | 946  | 38737  | 85,51  | 93,1 |
| chr12 | 52139667 | 52139870 | SCN8A  | NM_014191 | 27 | 26 | 13 | 133  | 146  | 6129   | 30,04  | 100  |
| chr12 | 52145177 | 52145463 | SCN8A  | NM_014191 | 27 | 26 | 14 | 239  | 1398 | 65621  | 228,64 | 84,1 |
| chr12 | 52156225 | 52156413 | SCN8A  | NM_014191 | 27 | 26 | 15 | 174  | 680  | 30114  | 159,33 | 73   |
| chr12 | 52159416 | 52159782 | SCN8A  | NM_014191 | 27 | 26 | 16 | 357  | 665  | 30354  | 82,71  | 91,9 |
| chr12 | 52162551 | 52163086 | SCN8A  | NM_014191 | 27 | 26 | 17 | 471  | 3122 | 141385 | 263,78 | 93   |
| chr12 | 52163586 | 52163768 | SCN8A  | NM_014191 | 27 | 26 | 18 | 118  | 609  | 26777  | 146,32 | 99,2 |
| chr12 | 52164325 | 52164534 | SCN8A  | NM_014191 | 27 | 26 | 19 | 155  | 410  | 17918  | 85,32  | 92,3 |
| chr12 | 52167914 | 52168084 | SCN8A  | NM_014191 | 27 | 26 | 20 | 174  | 536  | 21796  | 127,46 | 64,4 |
| chr12 | 52174381 | 52174605 | SCN8A  | NM_014191 | 27 | 26 | 21 | 123  | 41   | 1975   | 8,78   | 100  |
| chr12 | 52180378 | 52180664 | SCN8A  | NM_014191 | 27 | 26 | 22 | 285  | 445  | 20372  | 70,98  | 81,8 |
| chr12 | 52182480 | 52182680 | SCN8A  | NM_014191 | 27 | 26 | 23 | 54   | 190  | 8193   | 40,76  | 98,1 |
| chr12 | 52183108 | 52183287 | SCN8A  | NM_014191 | 27 | 26 | 24 | 138  | 845  | 36555  | 203,08 | 68,8 |
| chr12 | 52184061 | 52184267 | SCN8A  | NM_014191 | 27 | 26 | 25 | 105  | 141  | 6213   | 30,01  | 81,9 |
| chr12 | 52188092 | 52188363 | SCN8A  | NM_014191 | 27 | 26 | 26 | 271  | 975  | 42216  | 155,21 | 77,1 |
| chr12 | 52200014 | 52201189 | SCN8A  | NM_014191 | 27 | 26 | 27 | 1148 | 3865 | 187361 | 159,32 | 97,9 |
| chr12 | 56396265 | 56396536 | SUOX   | NM_000456 | 6  | 3  | 5  | 178  | 1543 | 71659  | 263,45 | 100  |
| chr12 | 56397422 | 56398908 | SUOX   | NM_000456 | 6  | 3  | 6  | 1410 | 8579 | 404639 | 272,12 | 98,6 |
| chr12 | 65110522 | 65110710 | GNS    | NM_002076 | 14 | 14 | 14 | 79   | 164  | 7612   | 40,28  | 98,7 |
| chr12 | 65113838 | 65114041 | GNS    | NM_002076 | 14 | 14 | 13 | 161  | 536  | 24200  | 118,63 | 77,6 |
| chr12 | 65115389 | 65115601 | GNS    | NM_002076 | 14 | 14 | 12 | 111  | 75   | 3388   | 15,91  | 87,4 |
| chr12 | 65116811 | 65116999 | GNS    | NM_002076 | 14 | 14 | 11 | 108  | 591  | 26425  | 139,81 | 76,9 |
| chr12 | 65122650 | 65122847 | GNS    | NM_002076 | 14 | 14 | 10 | 102  | 229  | 9603   | 48,5   | 100  |
| chr12 | 65130780 | 65130965 | GNS    | NM_002076 | 14 | 14 | 9  | 104  | 199  | 8093   | 43,51  | 100  |
| chr12 | 65133185 | 65133391 | GNS    | NM_002076 | 14 | 14 | 8  | 119  | 76   | 3395   | 16,4   | 79,8 |
| chr12 | 65134281 | 65134469 | GNS    | NM_002076 | 14 | 14 | 7  | 83   | 304  | 12345  | 65,32  | 100  |
| chr12 | 65136859 | 65137041 | GNS    | NM_002076 | 14 | 14 | 6  | 168  | 223  | 9655   | 52,76  | 72   |
| chr12 | 65138471 | 65138689 | GNS    | NM_002076 | 14 | 14 | 5  | 99   | 749  | 34140  | 155,89 | 100  |
| chr12 | 65139362 | 65139586 | GNS    | NM_002076 | 14 | 14 | 4  | 66   | 804  | 34851  | 154,89 | 100  |
| chr12 | 65141479 | 65141655 | GNS    | NM_002076 | 14 | 14 | 3  | 207  | 189  | 8050   | 45,48  | 79,2 |
| chr12 | 65146478 | 65146693 | GNS    | NM_002076 | 14 | 14 | 2  | 60   | 103  | 4594   | 21,27  | 100  |
| chr12 | 65152797 | 65152997 | GNS    | NM_002076 | 14 | 14 | 1  | 192  | 39   | 1798   | 8,95   | 69,3 |
| chr12 | 76739517 | 76741643 | BBS10  | NM_024685 | 2  | 2  | 2  | 1975 | 4096 | 196841 | 92,54  | 100  |
| chr12 | 76741918 | 76742222 | BBS10  | NM_024685 | 2  | 2  | 1  | 197  | 170  | 7140   | 23,41  | 100  |
| chr12 | 88443010 | 88443290 | CEP290 | NM_025114 | 54 | 53 | 54 | 231  | 59   | 2763   | 9,83   | 78,8 |
| chr12 | 88444136 | 88444342 | CEP290 | NM_025114 | 54 | 53 | 53 | 80   | 437  | 18507  | 89,41  | 93,8 |
| chr12 | 88447348 | 88447545 | CEP290 | NM_025114 | 54 | 53 | 52 | 95   | 331  | 12973  | 65,52  | 100  |
| chr12 | 88448065 | 88448244 | CEP290 | NM_025114 | 54 | 53 | 51 | 74   | 752  | 31296  | 173,87 | 100  |
| chr12 | 88449323 | 88449508 | CEP290 | NM_025114 | 54 | 53 | 50 | 142  | 259  | 10789  | 58,01  | 100  |
| chr12 | 88452580 | 88452774 | CEP290 | NM_025114 | 54 | 53 | 49 | 173  | 1238 | 53092  | 272,27 | 86,7 |
| chr12 | 88453656 | 88453850 | CEP290 | NM_025114 | 54 | 53 | 48 | 123  | 285  | 11817  | 60,6   | 100  |
| chr12 | 88454660 | 88454848 | CEP290 | NM_025114 | 54 | 53 | 47 | 165  | 63   | 2704   | 14,31  | 67,9 |
| chr12 | 88456363 | 88456536 | CEP290 | NM_025114 | 54 | 53 | 46 | 87   | 260  | 11009  | 63,27  | 78,2 |
| chr12 | 88457766 | 88457957 | CEP290 | NM_025114 | 54 | 53 | 45 | 135  | 235  | 9616   | 50,08  | 94,1 |
| chr12 | 88462302 | 88462478 | CEP290 | NM_025114 | 54 | 53 | 44 | 124  | 357  | 15638  | 88,35  | 97,6 |
| chr12 | 88465063 | 88465239 | CEP290 | NM_025114 | 54 | 53 | 43 | 156  | 610  | 26072  | 147,3  | 100  |
| chr12 | 88465542 | 88465724 | CEP290 | NM_025114 | 54 | 53 | 42 | 146  | 142  | 5914   | 32,32  | 100  |
| chr12 | 88470932 | 88471123 | CEP290 | NM_025114 | 54 | 53 | 41 | 123  | 317  | 14208  | 74     | 100  |
| chr12 | 88471420 | 88471694 | CEP290 | NM_025114 | 54 | 53 | 40 | 222  | 378  | 17021  | 61,89  | 99,5 |
| chr12 | 88472846 | 88473031 | CEP290 | NM_025114 | 54 | 53 | 39 | 138  | 196  | 7433   | 39,96  | 100  |
| chr12 | 88473944 | 88474132 | CEP290 | NM_025114 | 54 | 53 | 38 | 214  | 363  | 15911  | 84,19  | 81,3 |
| chr12 | 88476846 | 88477022 | CEP290 | NM_025114 | 54 | 53 | 37 | 200  | 332  | 13210  | 74,63  | 81   |
| chr12 | 88477517 | 88477732 | CEP290 | NM_025114 | 54 | 53 | 36 | 108  | 145  | 6283   | 29,09  | 100  |
| chr12 | 88478361 | 88478620 | CEP290 | NM_025114 | 54 | 53 | 35 | 267  | 497  | 22215  | 85,44  | 96,6 |
| chr12 | 88479809 | 88480003 | CEP290 | NM_025114 | 54 | 53 | 34 | 135  | 114  | 4623   | 23,71  | 100  |
| chr12 | 88480136 | 88480318 | CEP290 | NM_025114 | 54 | 53 | 33 | 108  | 299  | 12559  | 68,63  | 100  |
| chr12 | 88481568 | 88481759 | CEP290 | NM_025114 | 54 | 53 | 32 | 165  | 109  | 4360   | 22,71  | 93,3 |

|       |           |           |         |              |    |    |       |         |      |        |        |             |
|-------|-----------|-----------|---------|--------------|----|----|-------|---------|------|--------|--------|-------------|
| chr12 | 88482891  | 88483301  | CEP290  | NM_025114    | 54 | 53 | 31    | 456     | 972  | 44812  | 109,03 | 82          |
| chr12 | 88484427  | 88484624  | CEP290  | NM_025114    | 54 | 53 | 30    | 112     | 254  | 10691  | 53,99  | 100         |
| chr12 | 88486433  | 88486627  | CEP290  | NM_025114    | 54 | 53 | 29    | 152     | 850  | 37684  | 193,25 | 100         |
| chr12 | 88487558  | 88487746  | CEP290  | NM_025114    | 54 | 53 | 28    | 206     | 754  | 31454  | 166,42 | 91,7        |
| chr12 | 88490659  | 88490844  | CEP290  | NM_025114    | 54 | 53 | 27    | 112     | 175  | 7340   | 39,46  | 100         |
| chr12 | 88496613  | 88496789  | CEP290  | NM_025114    | 54 | 53 | 26    | 174     | 62   | 2313   | 13,07  | 100         |
| chr12 | 88500383  | 88500835  | CEP290  | NM_025114    | 54 | 53 | 25,24 | 231.103 | 728  | 34756  | 76,72  | 100,0,61.2  |
| chr12 | 88502731  | 88502943  | CEP290  | NM_025114    | 54 | 53 | 23    | 116     | 83   | 3497   | 16,42  | 87,1        |
| chr12 | 88505013  | 88505213  | CEP290  | NM_025114    | 54 | 53 | 22    | 150     | 175  | 6728   | 33,47  | 77,3        |
| chr12 | 88505461  | 88505646  | CEP290  | NM_025114    | 54 | 53 | 21    | 165     | 501  | 20171  | 108,45 | 100         |
| chr12 | 88508146  | 88508328  | CEP290  | NM_025114    | 54 | 53 | 20    | 143     | 302  | 12822  | 70,07  | 92,3        |
| chr12 | 88508789  | 88508977  | CEP290  | NM_025114    | 54 | 53 | 19    | 85      | 126  | 5239   | 27,72  | 100         |
| chr12 | 88510804  | 88510983  | CEP290  | NM_025114    | 54 | 53 | 18    | 113     | 128  | 5184   | 28,8   | 100         |
| chr12 | 88512237  | 88512529  | CEP290  | NM_025114    | 54 | 53 | 17,16 | 88.101  | 707  | 31417  | 107,23 | 100,0,100.0 |
| chr12 | 88513826  | 88514002  | CEP290  | NM_025114    | 54 | 53 | 15    | 163     | 211  | 8281   | 46,79  | 68,7        |
| chr12 | 88514749  | 88514955  | CEP290  | NM_025114    | 54 | 53 | 14    | 170     | 919  | 40421  | 195,27 | 100         |
| chr12 | 88519020  | 88519217  | CEP290  | NM_025114    | 54 | 53 | 13    | 124     | 164  | 7313   | 36,93  | 100         |
| chr12 | 88519987  | 88520178  | CEP290  | NM_025114    | 54 | 53 | 12    | 123     | 513  | 22867  | 119,1  | 69,9        |
| chr12 | 88522703  | 88522882  | CEP290  | NM_025114    | 54 | 53 | 11    | 90      | 359  | 15747  | 87,48  | 100         |
| chr12 | 88523470  | 88523646  | CEP290  | NM_025114    | 54 | 53 | 10    | 183     | 374  | 14395  | 81,33  | 96,2        |
| chr12 | 88524005  | 88524276  | CEP290  | NM_025114    | 54 | 53 | 9     | 153     | 694  | 32167  | 118,26 | 100         |
| chr12 | 88524808  | 88524999  | CEP290  | NM_025114    | 54 | 53 | 7     | 54      | 184  | 7788   | 40,56  | 100         |
| chr12 | 88530370  | 88530561  | CEP290  | NM_025114    | 54 | 53 | 6     | 144     | 515  | 21152  | 110,17 | 98,6        |
| chr12 | 88532820  | 88533014  | CEP290  | NM_025114    | 54 | 53 | 5     | 47      | 166  | 6304   | 32,33  | 100         |
| chr12 | 88533215  | 88533397  | CEP290  | NM_025114    | 54 | 53 | 4     | 70      | 178  | 7977   | 43,59  | 100         |
| chr12 | 88534785  | 88535139  | CEP290  | NM_025114    | 54 | 53 | 3,2   | 78.102  | 319  | 14619  | 41,18  | 33,3,100.0  |
| chr12 | 95365260  | 95365620  | NDUFA12 | NM_018838    | 4  | 4  | 4     | 181     | 1092 | 52157  | 144,48 | 75,7        |
| chr12 | 95387889  | 95388074  | NDUFA12 | NM_018838    | 4  | 4  | 3     | 88      | 392  | 18876  | 101,48 | 100         |
| chr12 | 95396530  | 95396700  | NDUFA12 | NM_018838    | 4  | 4  | 2     | 83      | 197  | 8313   | 48,61  | 81,9        |
| chr12 | 95397259  | 95397459  | NDUFA12 | NM_018838    | 4  | 4  | 1     | 86      | 528  | 22769  | 113,28 | 100         |
| chr12 | 102811519 | 102811817 | IGF1    | NM_001111285 | 4  | 4  | 4     | 186     | 3890 | 182964 | 611,92 | 100         |
| chr12 | 102813334 | 102813525 | IGF1    | NM_001111285 | 4  | 4  | 3     | 182     | 267  | 11235  | 58,52  | 74,2        |
| chr12 | 102869335 | 102869532 | IGF1    | NM_001111285 | 4  | 4  | 2     | 157     | 460  | 19204  | 96,99  | 71,3        |
| chr12 | 102874132 | 102874335 | IGF1    | NM_001111285 | 4  | 4  | 1     | 63      | 456  | 18682  | 91,58  | 44,4        |
| chr12 | 106751569 | 106751748 | POLR3B  | NM_018082    | 28 | 28 | 1     | 72      | 29   | 1335   | 7,42   | 100         |
| chr12 | 106757548 | 106757724 | POLR3B  | NM_018082    | 28 | 28 | 2     | 33      | 126  | 4979   | 28,13  | 100         |
| chr12 | 106760341 | 106760514 | POLR3B  | NM_018082    | 28 | 28 | 3,4   | 57,65   | 162  | 6994   | 40,2   | 17,5,100.0  |
| chr12 | 106763062 | 106763235 | POLR3B  | NM_018082    | 28 | 28 | 5     | 76      | 162  | 5443   | 31,28  | 88,2        |
| chr12 | 106763241 | 106763450 | POLR3B  | NM_018082    | 28 | 28 | 6     | 101     | 325  | 13933  | 66,35  | 89,1        |
| chr12 | 106770124 | 106770306 | POLR3B  | NM_018082    | 28 | 28 | 7     | 92      | 652  | 28321  | 154,76 | 100         |
| chr12 | 106771931 | 106772140 | POLR3B  | NM_018082    | 28 | 28 | 8     | 118     | 289  | 12910  | 61,48  | 81,4        |
| chr12 | 106773738 | 106773932 | POLR3B  | NM_018082    | 28 | 28 | 9     | 109     | 445  | 19358  | 99,27  | 100         |
| chr12 | 106786736 | 106786954 | POLR3B  | NM_018082    | 28 | 28 | 10    | 123     | 671  | 30248  | 138,12 | 100         |
| chr12 | 106799624 | 106799839 | POLR3B  | NM_018082    | 28 | 28 | 11    | 120     | 290  | 12252  | 56,72  | 100         |
| chr12 | 106804582 | 106804761 | POLR3B  | NM_018082    | 28 | 28 | 12    | 135     | 232  | 10362  | 57,57  | 100         |
| chr12 | 106820991 | 106821176 | POLR3B  | NM_018082    | 28 | 28 | 13    | 162     | 355  | 16002  | 86,03  | 90,1        |
| chr12 | 106824005 | 106824181 | POLR3B  | NM_018082    | 28 | 28 | 14    | 201     | 138  | 5626   | 31,79  | 65,2        |
| chr12 | 106826106 | 106826312 | POLR3B  | NM_018082    | 28 | 28 | 15    | 163     | 357  | 14795  | 71,47  | 93,9        |
| chr12 | 106827473 | 106827667 | POLR3B  | NM_018082    | 28 | 28 | 16    | 154     | 377  | 16405  | 84,13  | 100         |
| chr12 | 106830777 | 106830956 | POLR3B  | NM_018082    | 28 | 28 | 17    | 75      | 146  | 6046   | 33,59  | 100         |
| chr12 | 106831341 | 106831550 | POLR3B  | NM_018082    | 28 | 28 | 18    | 99      | 176  | 7914   | 37,69  | 92,9        |
| chr12 | 106838189 | 106838416 | POLR3B  | NM_018082    | 28 | 28 | 19    | 128     | 681  | 29257  | 128,32 | 100         |
| chr12 | 106848311 | 106848514 | POLR3B  | NM_018082    | 28 | 28 | 20    | 210     | 212  | 8532   | 41,82  | 85,2        |
| chr12 | 106850891 | 106851091 | POLR3B  | NM_018082    | 28 | 28 | 21    | 159     | 327  | 13523  | 67,28  | 100         |
| chr12 | 106852981 | 106853196 | POLR3B  | NM_018082    | 28 | 28 | 22    | 118     | 413  | 17136  | 79,33  | 100         |
| chr12 | 106857238 | 106857414 | POLR3B  | NM_018082    | 28 | 28 | 23    | 143     | 381  | 14551  | 82,21  | 100         |
| chr12 | 106889721 | 106889915 | POLR3B  | NM_018082    | 28 | 28 | 24    | 104     | 1305 | 54808  | 281,07 | 79,8        |

|       |           |           |          |              |    |    |       |         |      |        |        |             |
|-------|-----------|-----------|----------|--------------|----|----|-------|---------|------|--------|--------|-------------|
| chr12 | 106890581 | 106890769 | POLR3B   | NM_018082    | 28 | 28 | 25    | 167     | 405  | 18724  | 99,07  | 69,5        |
| chr12 | 106894982 | 106895182 | POLR3B   | NM_018082    | 28 | 28 | 26    | 114     | 353  | 15528  | 77,25  | 71,9        |
| chr12 | 106897806 | 106898024 | POLR3B   | NM_018082    | 28 | 28 | 27    | 174     | 376  | 16517  | 75,42  | 95,4        |
| chr12 | 106903237 | 106903413 | POLR3B   | NM_018082    | 28 | 28 | 28    | 130     | 174  | 7471   | 42,21  | 70          |
| chr12 | 110012497 | 110012700 | MVK      | NM_001114185 | 11 | 10 | 2     | 78      | 671  | 28988  | 142,1  | 93,6        |
| chr12 | 110013716 | 110013901 | MVK      | NM_001114185 | 11 | 10 | 3     | 148     | 505  | 22427  | 120,58 | 66,9        |
| chr12 | 110017506 | 110017727 | MVK      | NM_001114185 | 11 | 10 | 4     | 145     | 744  | 33124  | 149,21 | 83,4        |
| chr12 | 110019252 | 110019437 | MVK      | NM_001114185 | 11 | 10 | 5     | 156     | 426  | 19031  | 102,32 | 66,7        |
| chr12 | 110023850 | 110024038 | MVK      | NM_001114185 | 11 | 10 | 6     | 104     | 215  | 9706   | 51,35  | 77,9        |
| chr12 | 110024436 | 110024612 | MVK      | NM_001114185 | 11 | 10 | 7     | 46      | 156  | 6808   | 38,46  | 100         |
| chr12 | 110028583 | 110028768 | MVK      | NM_001114185 | 11 | 10 | 8     | 91      | 432  | 18141  | 97,53  | 92,3        |
| chr12 | 110029072 | 110029275 | MVK      | NM_001114185 | 11 | 10 | 9     | 117     | 381  | 15361  | 75,3   | 77,8        |
| chr12 | 110032746 | 110032937 | MVK      | NM_001114185 | 11 | 10 | 10    | 154     | 355  | 14426  | 75,14  | 68,2        |
| chr12 | 110034155 | 110034352 | MVK      | NM_001114185 | 11 | 10 | 11    | 152     | 146  | 6425   | 32,45  | 80,3        |
| chr12 | 110719589 | 110719774 | ATP2A2   | NM_170665    | 20 | 20 | 1     | 118     | 52   | 2439   | 13,11  | 100         |
| chr12 | 110720359 | 110720532 | ATP2A2   | NM_170665    | 20 | 20 | 2,3   | 18,83   | 802  | 33523  | 192,66 | 100.0,18.1  |
| chr12 | 110729746 | 110729949 | ATP2A2   | NM_170665    | 20 | 20 | 4     | 105     | 365  | 16956  | 83,12  | 100         |
| chr12 | 110734372 | 110734569 | ATP2A2   | NM_170665    | 20 | 20 | 5     | 139     | 271  | 11799  | 59,59  | 100         |
| chr12 | 110760760 | 110760963 | ATP2A2   | NM_170665    | 20 | 20 | 6     | 81      | 464  | 19765  | 96,89  | 100         |
| chr12 | 110764194 | 110764412 | ATP2A2   | NM_170665    | 20 | 20 | 7     | 86      | 610  | 25052  | 114,39 | 100         |
| chr12 | 110765374 | 110765879 | ATP2A2   | NM_170665    | 20 | 20 | 8     | 465     | 2280 | 102483 | 202,54 | 96,6        |
| chr12 | 110770357 | 110770545 | ATP2A2   | NM_170665    | 20 | 20 | 9     | 89      | 379  | 15844  | 83,83  | 100         |
| chr12 | 110770948 | 110771142 | ATP2A2   | NM_170665    | 20 | 20 | 10    | 103     | 210  | 9220   | 47,28  | 100         |
| chr12 | 110771779 | 110771970 | ATP2A2   | NM_170665    | 20 | 20 | 11    | 132     | 532  | 23476  | 122,27 | 100         |
| chr12 | 110777037 | 110777468 | ATP2A2   | NM_170665    | 20 | 20 | 12,13 | 123.219 | 1467 | 68219  | 157,91 | 100.0,73.5  |
| chr12 | 110778382 | 110778766 | ATP2A2   | NM_170665    | 20 | 20 | 14    | 336     | 871  | 40776  | 105,91 | 90,2        |
| chr12 | 110780044 | 110780312 | ATP2A2   | NM_170665    | 20 | 20 | 15    | 221     | 1814 | 78163  | 290,57 | 95          |
| chr12 | 110781055 | 110781273 | ATP2A2   | NM_170665    | 20 | 20 | 16    | 203     | 386  | 17010  | 77,67  | 91,1        |
| chr12 | 110782702 | 110782893 | ATP2A2   | NM_170665    | 20 | 20 | 17    | 86      | 239  | 10326  | 53,78  | 87,2        |
| chr12 | 110782999 | 110783175 | ATP2A2   | NM_170665    | 20 | 20 | 18    | 134     | 474  | 20534  | 116,01 | 91          |
| chr12 | 110783720 | 110784427 | ATP2A2   | NM_170665    | 20 | 20 | 19,20 | 118.270 | 3377 | 162534 | 229,57 | 100.0,100.0 |
| chr12 | 112856760 | 112856948 | PTPN11   | NM_002834    | 16 | 15 | 1     | 14      | 0    | 0      | 0      | 100         |
| chr12 | 112884180 | 112884300 | PTPN11   | NM_002834    | 16 | 15 | 2     | 123     | 173  | 6181   | 51,08  | 18,7        |
| chr12 | 112888273 | 112888393 | PTPN11   | NM_002834    | 16 | 15 | 3     | 195     | 70   | 2401   | 19,84  | 22,6        |
| chr12 | 112891069 | 112891266 | PTPN11   | NM_002834    | 16 | 15 | 4     | 193     | 731  | 31895  | 161,09 | 63,7        |
| chr12 | 112892480 | 112892600 | PTPN11   | NM_002834    | 16 | 15 | 5     | 117     | 39   | 1492   | 12,33  | 4,3         |
| chr12 | 112893853 | 112893973 | PTPN11   | NM_002834    | 16 | 15 | 6     | 114     | 107  | 4039   | 33,38  | 13,2        |
| chr12 | 112910820 | 112910940 | PTPN11   | NM_002834    | 16 | 15 | 7     | 97      | 274  | 10097  | 83,45  | 25,8        |
| chr12 | 112915399 | 112915661 | PTPN11   | NM_002834    | 16 | 15 | 8,9   | 80.159  | 533  | 23645  | 89,9   | 100.0,0.6   |
| chr12 | 112919989 | 112920109 | PTPN11   | NM_002834    | 16 | 15 | 10    | 132     | 766  | 27604  | 228,13 | 15,9        |
| chr12 | 112924433 | 112924553 | PTPN11   | NM_002834    | 16 | 15 | 11    | 155     | 364  | 14433  | 119,28 | 0,6         |
| chr12 | 112926943 | 112927063 | PTPN11   | NM_002834    | 16 | 15 | 13    | 152     | 276  | 9090   | 75,12  | 24,3        |
| chr12 | 112940040 | 112940160 | PTPN11   | NM_002834    | 16 | 15 | 14    | 113     | 16   | 646    | 5,34   | 18,6        |
| chr12 | 122277667 | 122278021 | HPD      | NM_002150    | 14 | 14 | 14,13 | 111.117 | 618  | 28091  | 79,13  | 70.3,100.0  |
| chr12 | 122281543 | 122281746 | HPD      | NM_002150    | 14 | 14 | 12    | 123     | 787  | 34369  | 168,48 | 100         |
| chr12 | 122284760 | 122285123 | HPD      | NM_002150    | 14 | 14 | 11,10 | 72.163  | 1068 | 48445  | 133,09 | 100.0,100.0 |
| chr12 | 122286894 | 122287112 | HPD      | NM_002150    | 14 | 14 | 9     | 78      | 221  | 9603   | 43,85  | 100         |
| chr12 | 122287526 | 122287714 | HPD      | NM_002150    | 14 | 14 | 8     | 104     | 195  | 8549   | 45,23  | 100         |
| chr12 | 122292556 | 122292738 | HPD      | NM_002150    | 14 | 14 | 7     | 90      | 387  | 16221  | 88,64  | 100         |
| chr12 | 122294197 | 122294563 | HPD      | NM_002150    | 14 | 14 | 6,5   | 83,43   | 1342 | 63379  | 172,69 | 100.0,100.0 |
| chr12 | 122295224 | 122295409 | HPD      | NM_002150    | 14 | 14 | 4     | 105     | 237  | 10414  | 55,99  | 100         |
| chr12 | 122295656 | 122295838 | HPD      | NM_002150    | 14 | 14 | 3     | 63      | 93   | 3720   | 20,33  | 100         |
| chr12 | 122296566 | 122296745 | HPD      | NM_002150    | 14 | 14 | 2,1   | 27,3    | 513  | 20933  | 116,29 | 100.0,100.0 |
| chr12 | 124197112 | 124197297 | ATP6V0A2 | NM_012463    | 20 | 20 | 1     | 117     | 23   | 1108   | 5,96   | 100         |
| chr12 | 124203144 | 124203326 | ATP6V0A2 | NM_012463    | 20 | 20 | 2     | 79      | 131  | 6166   | 33,69  | 100         |
| chr12 | 124206861 | 124207091 | ATP6V0A2 | NM_012463    | 20 | 20 | 3     | 98      | 162  | 7242   | 31,35  | 100         |
| chr12 | 124209163 | 124209378 | ATP6V0A2 | NM_012463    | 20 | 20 | 4     | 138     | 95   | 3681   | 17,04  | 100         |

|       |           |           |          |           |    |    |          |            |      |        |        |                   |
|-------|-----------|-----------|----------|-----------|----|----|----------|------------|------|--------|--------|-------------------|
| chr12 | 124210612 | 124210830 | ATP6V0A2 | NM_012463 | 20 | 20 | 5        | 89         | 371  | 15952  | 72,84  | 97,8              |
| chr12 | 124212346 | 124212552 | ATP6V0A2 | NM_012463 | 20 | 20 | 6        | 127        | 375  | 15872  | 76,68  | 87,4              |
| chr12 | 124218362 | 124218553 | ATP6V0A2 | NM_012463 | 20 | 20 | 7        | 83         | 250  | 10950  | 57,03  | 97,6              |
| chr12 | 124220087 | 124220269 | ATP6V0A2 | NM_012463 | 20 | 20 | 8        | 94         | 723  | 28284  | 154,56 | 90,4              |
| chr12 | 124221656 | 124221945 | ATP6V0A2 | NM_012463 | 20 | 20 | 9        | 213        | 644  | 28949  | 99,82  | 76,5              |
| chr12 | 124228297 | 124228518 | ATP6V0A2 | NM_012463 | 20 | 20 | 10       | 151        | 209  | 9428   | 42,47  | 100               |
| chr12 | 124228685 | 124228885 | ATP6V0A2 | NM_012463 | 20 | 20 | 11       | 137        | 457  | 19005  | 94,55  | 100               |
| chr12 | 124229045 | 124229485 | ATP6V0A2 | NM_012463 | 20 | 20 | 12,13    | 188,91     | 2714 | 118169 | 267,96 | 100,0,62.6        |
| chr12 | 124232058 | 124232258 | ATP6V0A2 | NM_012463 | 20 | 20 | 14       | 119        | 470  | 20229  | 100,64 | 88,2              |
| chr12 | 124233120 | 124233329 | ATP6V0A2 | NM_012463 | 20 | 20 | 15       | 211        | 152  | 6406   | 30,5   | 98,6              |
| chr12 | 124235616 | 124235831 | ATP6V0A2 | NM_012463 | 20 | 20 | 16       | 120        | 965  | 41464  | 191,96 | 100               |
| chr12 | 124236759 | 124236962 | ATP6V0A2 | NM_012463 | 20 | 20 | 17       | 120        | 219  | 9720   | 47,65  | 100               |
| chr12 | 124238856 | 124239050 | ATP6V0A2 | NM_012463 | 20 | 20 | 18       | 118        | 741  | 31734  | 162,74 | 71,2              |
| chr12 | 124241383 | 124241577 | ATP6V0A2 | NM_012463 | 20 | 20 | 19       | 172        | 338  | 14949  | 76,66  | 87,8              |
| chr12 | 124242471 | 124242653 | ATP6V0A2 | NM_012463 | 20 | 20 | 20       | 106        | 664  | 28271  | 154,49 | 100               |
| chr12 | 132414143 | 132414731 | PUS1     | NM_025215 | 6  | 6  | 1,2      | 74.229     | 66   | 2954   | 5,02   | 100,0,100,0       |
| chr12 | 132416586 | 132416842 | PUS1     | NM_025215 | 6  | 6  | 3        | 138        | 551  | 24110  | 93,81  | 89,1              |
| chr12 | 132423596 | 132423820 | PUS1     | NM_025215 | 6  | 6  | 4        | 103        | 473  | 20984  | 93,26  | 100               |
| chr12 | 132425833 | 132426513 | PUS1     | NM_025215 | 6  | 6  | 5        | 692        | 1459 | 67670  | 99,37  | 97,8              |
| chr12 | 132428119 | 132428239 | PUS1     | NM_025215 | 6  | 6  | 6        | 48         | 163  | 5414   | 44,74  | 27,1              |
| chr13 | 25457204  | 25457537  | CENPJ    | NM_018451 | 17 | 16 | 17       | 193        | 678  | 31336  | 93,82  | 100               |
| chr13 | 25458090  | 25458613  | CENPJ    | NM_018451 | 17 | 16 | 16,15,14 | 121,85,141 | 1027 | 44335  | 84,61  | 100,0,100,0,100,0 |
| chr13 | 25459392  | 25459589  | CENPJ    | NM_018451 | 17 | 16 | 13       | 111        | 647  | 27879  | 140,8  | 100               |
| chr13 | 25459690  | 25459860  | CENPJ    | NM_018451 | 17 | 16 | 12       | 65         | 153  | 5994   | 35,05  | 100               |
| chr13 | 25463291  | 25463506  | CENPJ    | NM_018451 | 17 | 16 | 11       | 85         | 214  | 8548   | 39,57  | 62,4              |
| chr13 | 25466794  | 25467047  | CENPJ    | NM_018451 | 17 | 16 | 10       | 225        | 396  | 17302  | 68,12  | 94,2              |
| chr13 | 25473593  | 25473790  | CENPJ    | NM_018451 | 17 | 16 | 9        | 166        | 355  | 16206  | 81,85  | 78,3              |
| chr13 | 25478077  | 25478283  | CENPJ    | NM_018451 | 17 | 16 | 8        | 133        | 213  | 8409   | 40,62  | 90,2              |
| chr13 | 25479470  | 25481335  | CENPJ    | NM_018451 | 17 | 16 | 7,6      | 1.615.103  | 4701 | 226574 | 121,42 | 100,0,100,0       |
| chr13 | 25482124  | 25482297  | CENPJ    | NM_018451 | 17 | 16 | 5        | 109        | 888  | 40126  | 230,61 | 100               |
| chr13 | 25483826  | 25484180  | CENPJ    | NM_018451 | 17 | 16 | 4        | 297        | 411  | 17671  | 49,78  | 85,2              |
| chr13 | 25486105  | 25486299  | CENPJ    | NM_018451 | 17 | 16 | 3        | 124        | 129  | 4946   | 25,36  | 83,1              |
| chr13 | 25486668  | 25487188  | CENPJ    | NM_018451 | 17 | 16 | 2        | 444        | 1439 | 67753  | 130,04 | 100               |
| chr13 | 31774086  | 31774298  | B3GALT   | NM_194318 | 15 | 15 | 1        | 70         | 0    | 0      | 0      | 100               |
| chr13 | 31789118  | 31789303  | B3GALT   | NM_194318 | 15 | 15 | 2        | 50         | 143  | 5766   | 31     | 100               |
| chr13 | 31796957  | 31797133  | B3GALT   | NM_194318 | 15 | 15 | 3        | 40         | 263  | 11125  | 62,85  | 100               |
| chr13 | 31803327  | 31803539  | B3GALT   | NM_194318 | 15 | 15 | 4        | 110        | 273  | 11543  | 54,19  | 95,5              |
| chr13 | 31821097  | 31821312  | B3GALT   | NM_194318 | 15 | 15 | 5        | 77         | 246  | 9871   | 45,7   | 100               |
| chr13 | 31821986  | 31822162  | B3GALT   | NM_194318 | 15 | 15 | 6        | 112        | 183  | 7402   | 41,82  | 100               |
| chr13 | 31835077  | 31835280  | B3GALT   | NM_194318 | 15 | 15 | 7        | 137        | 320  | 11855  | 58,11  | 100               |
| chr13 | 31843345  | 31843557  | B3GALT   | NM_194318 | 15 | 15 | 8        | 64         | 247  | 10645  | 49,98  | 100               |
| chr13 | 31848680  | 31848850  | B3GALT   | NM_194318 | 15 | 15 | 9        | 120        | 512  | 23395  | 136,81 | 71,7              |
| chr13 | 31850698  | 31850913  | B3GALT   | NM_194318 | 15 | 15 | 10       | 70         | 116  | 4685   | 21,69  | 100               |
| chr13 | 31858714  | 31858905  | B3GALT   | NM_194318 | 15 | 15 | 11       | 114        | 198  | 8326   | 43,36  | 100               |
| chr13 | 31860863  | 31861072  | B3GALT   | NM_194318 | 15 | 15 | 12       | 100        | 401  | 17363  | 82,68  | 94                |
| chr13 | 31891602  | 31891787  | B3GALT   | NM_194318 | 15 | 15 | 13       | 120        | 438  | 17620  | 94,73  | 70,8              |
| chr13 | 31897931  | 31898128  | B3GALT   | NM_194318 | 15 | 15 | 14       | 145        | 1050 | 46893  | 236,83 | 70,3              |
| chr13 | 31903614  | 31903894  | B3GALT   | NM_194318 | 15 | 15 | 15       | 168        | 2606 | 122284 | 435,17 | 100               |
| chr13 | 41367351  | 41367471  | SLC25A15 | NM_014252 | 7  | 6  | 2        | 55         | 869  | 30651  | 253,31 | 100               |
| chr13 | 41373226  | 41373485  | SLC25A15 | NM_014252 | 7  | 6  | 3        | 259        | 1457 | 64833  | 249,36 | 87,3              |
| chr13 | 41379294  | 41379470  | SLC25A15 | NM_014252 | 7  | 6  | 4        | 138        | 92   | 3971   | 22,44  | 71                |
| chr13 | 41381420  | 41381605  | SLC25A15 | NM_014252 | 7  | 6  | 5        | 170        | 393  | 16527  | 88,85  | 100               |
| chr13 | 51484045  | 51484245  | RNASEH2B | NM_024570 | 11 | 11 | 1        | 64         | 99   | 3446   | 17,14  | 51,6              |
| chr13 | 51501553  | 51501753  | RNASEH2B | NM_024570 | 11 | 11 | 2        | 72         | 218  | 9829   | 48,9   | 86,1              |
| chr13 | 51503606  | 51503800  | RNASEH2B | NM_024570 | 11 | 11 | 3        | 108        | 518  | 22287  | 114,29 | 100               |
| chr13 | 51504741  | 51504971  | RNASEH2B | NM_024570 | 11 | 11 | 4        | 77         | 194  | 8031   | 34,77  | 100               |
| chr13 | 51508974  | 51509177  | RNASEH2B | NM_024570 | 11 | 11 | 5        | 115        | 204  | 8243   | 40,41  | 100               |

|       |           |           |            |              |    |    |          |           |      |        |        |                  |
|-------|-----------|-----------|------------|--------------|----|----|----------|-----------|------|--------|--------|------------------|
| chr13 | 51517432  | 51517623  | RNASEH2B   | NM_024570    | 11 | 11 | 6        | 74        | 115  | 4618   | 24,05  | 100              |
| chr13 | 51519515  | 51519715  | RNASEH2B   | NM_024570    | 11 | 11 | 7        | 106       | 940  | 40201  | 200    | 100              |
| chr13 | 51522066  | 51522275  | RNASEH2B   | NM_024570    | 11 | 11 | 8        | 82        | 175  | 7951   | 37,86  | 100              |
| chr13 | 51523522  | 51523719  | RNASEH2B   | NM_024570    | 11 | 11 | 9        | 43        | 303  | 12837  | 64,83  | 100              |
| chr13 | 51528055  | 51528249  | RNASEH2B   | NM_024570    | 11 | 11 | 10       | 81        | 485  | 20650  | 105,9  | 82,7             |
| chr13 | 51530498  | 51530713  | RNASEH2B   | NM_024570    | 11 | 11 | 11       | 117       | 61   | 2568   | 11,89  | 96,6             |
| chr13 | 100633992 | 100635392 | ZIC2       | NM_007129    | 3  | 3  | 1        | 1075      | 1142 | 52494  | 37,47  | 99,9             |
| chr13 | 100637133 | 100637306 | ZIC2       | NM_007129    | 3  | 3  | 2        | 164       | 317  | 13813  | 79,39  | 65,2             |
| chr13 | 100637601 | 100637976 | ZIC2       | NM_007129    | 3  | 3  | 3        | 360       | 19   | 813    | 2,16   | 93,3             |
| chr13 | 103459526 | 103460138 | BIVM-ERCC5 | NM_001204425 | 23 | 23 | 1        | 478       | 1323 | 63389  | 103,41 | 100              |
| chr13 | 103468744 | 103468932 | BIVM-ERCC5 | NM_001204425 | 23 | 23 | 2        | 127       | 339  | 13651  | 72,23  | 100              |
| chr13 | 103473310 | 103473510 | BIVM-ERCC5 | NM_001204425 | 23 | 23 | 3        | 96        | 100  | 4176   | 20,78  | 100              |
| chr13 | 103474026 | 103474214 | BIVM-ERCC5 | NM_001204425 | 23 | 23 | 4        | 105       | 434  | 18208  | 96,34  | 100              |
| chr13 | 103474286 | 103474501 | BIVM-ERCC5 | NM_001204425 | 23 | 23 | 5        | 95        | 412  | 17879  | 82,77  | 91,6             |
| chr13 | 103483856 | 103484041 | BIVM-ERCC5 | NM_001204425 | 23 | 23 | 6        | 133       | 163  | 6788   | 36,49  | 95,5             |
| chr13 | 103486767 | 103486943 | BIVM-ERCC5 | NM_001204425 | 23 | 23 | 7        | 87        | 403  | 17033  | 96,23  | 100              |
| chr13 | 103490985 | 103491173 | BIVM-ERCC5 | NM_001204425 | 23 | 23 | 8        | 97        | 105  | 4575   | 24,21  | 100              |
| chr13 | 103491897 | 103492328 | BIVM-ERCC5 | NM_001204425 | 23 | 23 | 9        | 232       | 705  | 32868  | 76,08  | 100              |
| chr13 | 103504425 | 103504628 | BIVM-ERCC5 | NM_001204425 | 23 | 23 | 10       | 176       | 529  | 22474  | 110,17 | 91,5             |
| chr13 | 103506067 | 103506255 | BIVM-ERCC5 | NM_001204425 | 23 | 23 | 11       | 116       | 208  | 8570   | 45,34  | 100              |
| chr13 | 103506595 | 103506765 | BIVM-ERCC5 | NM_001204425 | 23 | 23 | 12       | 87        | 216  | 8310   | 48,6   | 100              |
| chr13 | 103508268 | 103508471 | BIVM-ERCC5 | NM_001204425 | 23 | 23 | 13       | 61        | 282  | 12417  | 60,87  | 100              |
| chr13 | 103510602 | 103510802 | BIVM-ERCC5 | NM_001204425 | 23 | 23 | 14       | 144       | 131  | 5860   | 29,15  | 100              |
| chr13 | 103513884 | 103514093 | BIVM-ERCC5 | NM_001204425 | 23 | 23 | 15       | 208       | 398  | 17181  | 81,81  | 87               |
| chr13 | 103514331 | 103515396 | BIVM-ERCC5 | NM_001204425 | 23 | 23 | 16       | 1074      | 3324 | 160100 | 150,19 | 94,7             |
| chr13 | 103517896 | 103518330 | BIVM-ERCC5 | NM_001204425 | 23 | 23 | 17       | 245       | 626  | 28565  | 65,67  | 100              |
| chr13 | 103518533 | 103518715 | BIVM-ERCC5 | NM_001204425 | 23 | 23 | 18       | 120       | 64   | 2569   | 14,04  | 86,7             |
| chr13 | 103519048 | 103519263 | BIVM-ERCC5 | NM_001204425 | 23 | 23 | 19       | 214       | 68   | 2753   | 12,75  | 69,2             |
| chr13 | 103520458 | 103520652 | BIVM-ERCC5 | NM_001204425 | 23 | 23 | 20       | 145       | 213  | 9722   | 49,86  | 100              |
| chr13 | 103524565 | 103524792 | BIVM-ERCC5 | NM_001204425 | 23 | 23 | 21       | 201       | 739  | 33495  | 146,91 | 91,5             |
| chr13 | 103525580 | 103525780 | BIVM-ERCC5 | NM_001204425 | 23 | 23 | 22       | 85        | 454  | 19531  | 97,17  | 100              |
| chr13 | 103527677 | 103528292 | BIVM-ERCC5 | NM_001204425 | 23 | 23 | 23       | 597       | 671  | 32090  | 52,09  | 96,6             |
| chr13 | 108860760 | 108863662 | LIG4       | NM_002312    | 2  | 1  | 2        | 2736      | 8638 | 423464 | 145,87 | 100              |
| chr13 | 110802538 | 110802735 | COL4A1     | NM_001845    | 52 | 52 | 52       | 82        | 1161 | 50218  | 253,63 | 31,7             |
| chr13 | 110804621 | 110804794 | COL4A1     | NM_001845    | 52 | 52 | 51       | 173       | 239  | 9702   | 55,76  | 65,9             |
| chr13 | 110807526 | 110807723 | COL4A1     | NM_001845    | 52 | 52 | 50       | 115       | 424  | 18817  | 95,04  | 81,7             |
| chr13 | 110813464 | 110813664 | COL4A1     | NM_001845    | 52 | 52 | 49       | 178       | 389  | 17536  | 87,24  | 70,8             |
| chr13 | 110814525 | 110814719 | COL4A1     | NM_001845    | 52 | 52 | 48       | 213       | 771  | 34570  | 177,28 | 67,1             |
| chr13 | 110815830 | 110816018 | COL4A1     | NM_001845    | 52 | 52 | 47       | 99        | 582  | 23660  | 125,19 | 79,8             |
| chr13 | 110817247 | 110817447 | COL4A1     | NM_001845    | 52 | 52 | 46       | 129       | 332  | 14029  | 69,8   | 70,5             |
| chr13 | 110818502 | 110818726 | COL4A1     | NM_001845    | 52 | 52 | 45       | 72        | 211  | 9838   | 43,72  | 100              |
| chr13 | 110819500 | 110819700 | COL4A1     | NM_001845    | 52 | 52 | 44       | 73        | 290  | 12304  | 61,21  | 100              |
| chr13 | 110821891 | 110822067 | COL4A1     | NM_001845    | 52 | 52 | 43       | 134       | 313  | 12799  | 72,31  | 68,7             |
| chr13 | 110822958 | 110823137 | COL4A1     | NM_001845    | 52 | 52 | 42       | 186       | 483  | 20775  | 115,42 | 65,6             |
| chr13 | 110825033 | 110825215 | COL4A1     | NM_001845    | 52 | 52 | 41       | 51        | 72   | 2696   | 14,73  | 100              |
| chr13 | 110826249 | 110826467 | COL4A1     | NM_001845    | 52 | 52 | 40       | 99        | 965  | 40512  | 184,99 | 98               |
| chr13 | 110826833 | 110827190 | COL4A1     | NM_001845    | 52 | 52 | 39,38    | 81.127    | 1201 | 56986  | 159,18 | 50,6,100.0       |
| chr13 | 110827609 | 110827803 | COL4A1     | NM_001845    | 52 | 52 | 37       | 140       | 418  | 16256  | 83,36  | 68,6             |
| chr13 | 110828720 | 110829305 | COL4A1     | NM_001845    | 52 | 52 | 36,35,34 | 90,99,153 | 1658 | 78267  | 133,56 | 100.0,100.0,48.4 |
| chr13 | 110830238 | 110830663 | COL4A1     | NM_001845    | 52 | 52 | 33,32    | 90.168    | 781  | 36608  | 85,93  | 45.6,100.0       |
| chr13 | 110831151 | 110831351 | COL4A1     | NM_001845    | 52 | 52 | 31       | 114       | 367  | 14481  | 72,04  | 71,9             |
| chr13 | 110831655 | 110831867 | COL4A1     | NM_001845    | 52 | 52 | 30       | 151       | 923  | 39425  | 185,09 | 75,5             |
| chr13 | 110833659 | 110833847 | COL4A1     | NM_001845    | 52 | 52 | 29       | 98        | 115  | 4025   | 21,3   | 79,6             |
| chr13 | 110835413 | 110835681 | COL4A1     | NM_001845    | 52 | 52 | 28,27    | 105,93    | 588  | 26494  | 98,49  | 30.5,100.0       |
| chr13 | 110838778 | 110838990 | COL4A1     | NM_001845    | 52 | 52 | 26       | 169       | 204  | 9098   | 42,71  | 72,8             |
| chr13 | 110839408 | 110839620 | COL4A1     | NM_001845    | 52 | 52 | 25       | 192       | 21   | 906    | 4,25   | 70,8             |
| chr13 | 110844522 | 110844740 | COL4A1     | NM_001845    | 52 | 52 | 24       | 71        | 764  | 32611  | 148,91 | 100              |

|       |           |           |        |           |    |    |       |         |      |       |        |             |
|-------|-----------|-----------|--------|-----------|----|----|-------|---------|------|-------|--------|-------------|
| chr13 | 110845190 | 110845372 | COL4A1 | NM_001845 | 52 | 52 | 23    | 84      | 430  | 18327 | 100,15 | 84,5        |
| chr13 | 110847344 | 110847550 | COL4A1 | NM_001845 | 52 | 52 | 22    | 96      | 100  | 4166  | 20,13  | 100         |
| chr13 | 110850867 | 110851070 | COL4A1 | NM_001845 | 52 | 52 | 21    | 165     | 192  | 8068  | 39,55  | 67,9        |
| chr13 | 110853109 | 110853333 | COL4A1 | NM_001845 | 52 | 52 | 20    | 36      | 503  | 21255 | 94,47  | 100         |
| chr13 | 110853766 | 110854031 | COL4A1 | NM_001845 | 52 | 52 | 19    | 85      | 700  | 31004 | 116,56 | 100         |
| chr13 | 110855878 | 110856051 | COL4A1 | NM_001845 | 52 | 52 | 18    | 42      | 314  | 12572 | 72,25  | 100         |
| chr13 | 110857734 | 110857916 | COL4A1 | NM_001845 | 52 | 52 | 17,16 | 54,45   | 142  | 6184  | 33,79  | 37,0,100.0  |
| chr13 | 110859002 | 110859291 | COL4A1 | NM_001845 | 52 | 52 | 15,14 | 51,27   | 273  | 11461 | 39,52  | 100,0,100.0 |
| chr13 | 110859683 | 110859898 | COL4A1 | NM_001845 | 52 | 52 | 13    | 87      | 373  | 16096 | 74,52  | 100         |
| chr13 | 110861044 | 110861268 | COL4A1 | NM_001845 | 52 | 52 | 12    | 42      | 1514 | 62989 | 279,95 | 100         |
| chr13 | 110861683 | 110861886 | COL4A1 | NM_001845 | 52 | 52 | 11    | 36      | 139  | 5432  | 26,63  | 100         |
| chr13 | 110862163 | 110862633 | COL4A1 | NM_001845 | 52 | 52 | 10,9  | 63,84   | 783  | 36434 | 77,35  | 100,0,100.0 |
| chr13 | 110863834 | 110864040 | COL4A1 | NM_001845 | 52 | 52 | 8     | 27      | 298  | 12856 | 62,11  | 100         |
| chr13 | 110864124 | 110864297 | COL4A1 | NM_001845 | 52 | 52 | 7     | 54      | 434  | 17473 | 100,42 | 100         |
| chr13 | 110864809 | 110864991 | COL4A1 | NM_001845 | 52 | 52 | 6,5   | 63,45   | 211  | 9112  | 49,79  | 28,6,100.0  |
| chr13 | 110866087 | 110866340 | COL4A1 | NM_001845 | 52 | 52 | 4,3   | 45,90   | 951  | 39087 | 153,89 | 100,0,75.6  |
| chr13 | 110894945 | 110895151 | COL4A1 | NM_001845 | 52 | 52 | 2     | 60      | 475  | 21086 | 101,86 | 100         |
| chr13 | 110959352 | 110959549 | COL4A1 | NM_001845 | 52 | 52 | 1     | 84      | 8    | 333   | 1,68   | 27,4        |
| chr13 | 110960187 | 110960467 | COL4A2 | NM_001846 | 48 | 47 | 2,3   | 44,55   | 584  | 26222 | 93,32  | 100,0,94.5  |
| chr13 | 111009749 | 111009943 | COL4A2 | NM_001846 | 48 | 47 | 4     | 81      | 153  | 6479  | 33,23  | 100         |
| chr13 | 111077120 | 111077421 | COL4A2 | NM_001846 | 48 | 47 | 5,6   | 135,45  | 603  | 27864 | 92,26  | 71.1,100.0  |
| chr13 | 111080699 | 111080896 | COL4A2 | NM_001846 | 48 | 47 | 7     | 117     | 251  | 11151 | 56,32  | 70,9        |
| chr13 | 111082122 | 111082295 | COL4A2 | NM_001846 | 48 | 47 | 8     | 72      | 470  | 20457 | 117,57 | 88,9        |
| chr13 | 111082696 | 111083145 | COL4A2 | NM_001846 | 48 | 47 | 9,10  | 36,63   | 1424 | 67590 | 150,2  | 100,0,100.0 |
| chr13 | 111084544 | 111084720 | COL4A2 | NM_001846 | 48 | 47 | 11    | 36      | 239  | 10561 | 59,67  | 100         |
| chr13 | 111086713 | 111086889 | COL4A2 | NM_001846 | 48 | 47 | 12    | 42      | 315  | 13535 | 76,47  | 100         |
| chr13 | 111088516 | 111088784 | COL4A2 | NM_001846 | 48 | 47 | 13    | 99      | 319  | 14124 | 52,51  | 100         |
| chr13 | 111090206 | 111090409 | COL4A2 | NM_001846 | 48 | 47 | 14    | 36      | 472  | 22640 | 110,98 | 100         |
| chr13 | 111090903 | 111091076 | COL4A2 | NM_001846 | 48 | 47 | 15    | 51      | 310  | 12993 | 74,67  | 100         |
| chr13 | 111092081 | 111092302 | COL4A2 | NM_001846 | 48 | 47 | 16    | 45      | 174  | 7811  | 35,18  | 100         |
| chr13 | 111098087 | 111098266 | COL4A2 | NM_001846 | 48 | 47 | 17    | 54      | 294  | 12743 | 70,79  | 100         |
| chr13 | 111099065 | 111099292 | COL4A2 | NM_001846 | 48 | 47 | 18    | 67      | 310  | 13410 | 58,82  | 100         |
| chr13 | 111102055 | 111102246 | COL4A2 | NM_001846 | 48 | 47 | 19    | 111     | 829  | 33692 | 175,48 | 73,9        |
| chr13 | 111102578 | 111102751 | COL4A2 | NM_001846 | 48 | 47 | 20    | 150     | 121  | 5075  | 29,17  | 66,7        |
| chr13 | 111109619 | 111110121 | COL4A2 | NM_001846 | 48 | 47 | 21    | 93      | 1093 | 49514 | 98,44  | 100         |
| chr13 | 111111048 | 111111227 | COL4A2 | NM_001846 | 48 | 47 | 22    | 164     | 209  | 9362  | 52,01  | 67,1        |
| chr13 | 111114419 | 111114708 | COL4A2 | NM_001846 | 48 | 47 | 23,24 | 73.107  | 523  | 25425 | 87,67  | 100,0,78.5  |
| chr13 | 111117701 | 111117907 | COL4A2 | NM_001846 | 48 | 47 | 25    | 202     | 111  | 4760  | 23     | 77,2        |
| chr13 | 111118351 | 111118548 | COL4A2 | NM_001846 | 48 | 47 | 26    | 60      | 387  | 16181 | 81,72  | 98,3        |
| chr13 | 111119248 | 111119451 | COL4A2 | NM_001846 | 48 | 47 | 27    | 57      | 87   | 3573  | 17,51  | 100         |
| chr13 | 111121451 | 111121651 | COL4A2 | NM_001846 | 48 | 47 | 28    | 108     | 61   | 2621  | 13,04  | 81,5        |
| chr13 | 111125181 | 111125479 | COL4A2 | NM_001846 | 48 | 47 | 29    | 222     | 85   | 3525  | 11,79  | 91,9        |
| chr13 | 111130255 | 111130455 | COL4A2 | NM_001846 | 48 | 47 | 30    | 162     | 156  | 6621  | 32,94  | 65,4        |
| chr13 | 111132623 | 111132811 | COL4A2 | NM_001846 | 48 | 47 | 31    | 171     | 86   | 3574  | 18,91  | 67,3        |
| chr13 | 111134760 | 111134960 | COL4A2 | NM_001846 | 48 | 47 | 32    | 144     | 493  | 20921 | 104,08 | 68,1        |
| chr13 | 111137218 | 111137397 | COL4A2 | NM_001846 | 48 | 47 | 33    | 123     | 151  | 6799  | 37,77  | 100         |
| chr13 | 111138067 | 111138267 | COL4A2 | NM_001846 | 48 | 47 | 34    | 182     | 486  | 21146 | 105,2  | 64,3        |
| chr13 | 111141675 | 111141848 | COL4A2 | NM_001846 | 48 | 47 | 35    | 64      | 707  | 29269 | 168,21 | 89,1        |
| chr13 | 111141973 | 111142161 | COL4A2 | NM_001846 | 48 | 47 | 36    | 75      | 795  | 34363 | 181,81 | 100         |
| chr13 | 111143578 | 111143787 | COL4A2 | NM_001846 | 48 | 47 | 37    | 108     | 347  | 15064 | 71,73  | 100         |
| chr13 | 111144376 | 111144585 | COL4A2 | NM_001846 | 48 | 47 | 38    | 108     | 97   | 4424  | 21,07  | 100         |
| chr13 | 111145523 | 111145732 | COL4A2 | NM_001846 | 48 | 47 | 39    | 72      | 410  | 16669 | 79,38  | 100         |
| chr13 | 111147585 | 111147776 | COL4A2 | NM_001846 | 48 | 47 | 40    | 126     | 1169 | 50750 | 264,32 | 69,8        |
| chr13 | 111153903 | 111154103 | COL4A2 | NM_001846 | 48 | 47 | 41    | 117     | 146  | 5962  | 29,66  | 76,1        |
| chr13 | 111155431 | 111155791 | COL4A2 | NM_001846 | 48 | 47 | 42,43 | 162,99  | 318  | 14378 | 39,83  | 100,0,62.6  |
| chr13 | 111156230 | 111156679 | COL4A2 | NM_001846 | 48 | 47 | 44,45 | 147.117 | 251  | 10759 | 23,91  | 75.5,100.0  |
| chr13 | 111158799 | 111158984 | COL4A2 | NM_001846 | 48 | 47 | 46    | 192     | 182  | 7543  | 40,55  | 80,7        |

|       |           |           |        |              |    |    |       |             |      |        |        |                  |
|-------|-----------|-----------|--------|--------------|----|----|-------|-------------|------|--------|--------|------------------|
| chr13 | 111160344 | 111160630 | COL4A2 | NM_001846    | 48 | 47 | 47    | 287         | 460  | 19097  | 66,54  | 78,4             |
| chr13 | 111164334 | 111164638 | COL4A2 | NM_001846    | 48 | 47 | 48    | 258         | 699  | 31025  | 101,72 | 79,5             |
| chr14 | 20940399  | 20940661  | PNP    | NM_000270    | 6  | 6  | 2     | 170         | 696  | 32152  | 122,25 | 100              |
| chr14 | 20942528  | 20943383  | PNP    | NM_000270    | 6  | 6  | 3,4,5 | 104.176.191 | 1982 | 92806  | 108,42 | 100,0,100,0,85,3 |
| chr14 | 20944453  | 20944908  | PNP    | NM_000270    | 6  | 6  | 6     | 218         | 3073 | 148525 | 325,71 | 100              |
| chr14 | 29236387  | 29238077  | FOXG1  | NM_005249    | 1  | 1  | 1     | 1470        | 2901 | 135722 | 80,26  | 100              |
| chr14 | 31535411  | 31535608  | AP4S1  | NM_007077    | 6  | 5  | 2     | 138         | 106  | 4774   | 24,11  | 94,2             |
| chr14 | 31538934  | 31539122  | AP4S1  | NM_007077    | 6  | 5  | 3     | 87          | 327  | 13309  | 70,42  | 85,1             |
| chr14 | 31542119  | 31542289  | AP4S1  | NM_007077    | 6  | 5  | 4     | 69          | 96   | 3923   | 22,94  | 88,4             |
| chr14 | 31549711  | 31549902  | AP4S1  | NM_007077    | 6  | 5  | 5     | 72          | 56   | 2444   | 12,73  | 100              |
| chr14 | 31553906  | 31554159  | AP4S1  | NM_007077    | 6  | 5  | 6     | 114         | 615  | 27684  | 108,99 | 100              |
| chr14 | 36986430  | 36987249  | NKX2-1 | NM_001079668 | 3  | 3  | 3     | 743         | 200  | 9124   | 11,13  | 100              |
| chr14 | 36988219  | 36988976  | NKX2-1 | NM_001079668 | 3  | 3  | 2     | 386         | 648  | 29824  | 39,35  | 92,5             |
| chr14 | 36989310  | 36989486  | NKX2-1 | NM_001079668 | 3  | 3  | 1     | 77          | 344  | 14536  | 82,12  | 32,5             |
| chr14 | 50087846  | 50089391  | MGAT2  | NM_002408    | 1  | 1  | 1     | 1344        | 4225 | 206261 | 133,42 | 100              |
| chr14 | 50713748  | 50714022  | L2HGDH | NM_024884    | 10 | 10 | 10    | 196         | 212  | 9140   | 33,24  | 100              |
| chr14 | 50732008  | 50732220  | L2HGDH | NM_024884    | 10 | 10 | 9     | 132         | 454  | 18888  | 88,68  | 100              |
| chr14 | 50734479  | 50734679  | L2HGDH | NM_024884    | 10 | 10 | 8     | 158         | 555  | 24080  | 119,8  | 94,9             |
| chr14 | 50735885  | 50736088  | L2HGDH | NM_024884    | 10 | 10 | 7     | 168         | 168  | 6645   | 32,57  | 97,6             |
| chr14 | 50745097  | 50745279  | L2HGDH | NM_024884    | 10 | 10 | 6     | 35          | 67   | 2880   | 15,74  | 100              |
| chr14 | 50750584  | 50750799  | L2HGDH | NM_024884    | 10 | 10 | 5     | 163         | 461  | 20015  | 92,66  | 100              |
| chr14 | 50760798  | 50761010  | L2HGDH | NM_024884    | 10 | 10 | 4     | 132         | 256  | 11280  | 52,96  | 100              |
| chr14 | 50768671  | 50768874  | L2HGDH | NM_024884    | 10 | 10 | 3     | 152         | 448  | 21080  | 103,33 | 92,1             |
| chr14 | 50769565  | 50769792  | L2HGDH | NM_024884    | 10 | 10 | 2     | 116         | 407  | 18415  | 80,77  | 100              |
| chr14 | 50778747  | 50778947  | L2HGDH | NM_024884    | 10 | 10 | 1     | 140         | 37   | 1309   | 6,51   | 87,1             |
| chr14 | 55310419  | 55310936  | GCH1   | NM_000161    | 6  | 6  | 6     | 127         | 1317 | 62641  | 120,93 | 100              |
| chr14 | 55312366  | 55312557  | GCH1   | NM_000161    | 6  | 6  | 5     | 85          | 2832 | 115937 | 603,84 | 84,7             |
| chr14 | 55313795  | 55314007  | GCH1   | NM_000161    | 6  | 6  | 4     | 32          | 194  | 9151   | 42,96  | 100              |
| chr14 | 55326263  | 55326478  | GCH1   | NM_000161    | 6  | 6  | 3     | 56          | 406  | 16844  | 77,98  | 100              |
| chr14 | 55332011  | 55332187  | GCH1   | NM_000161    | 6  | 6  | 2     | 110         | 645  | 27232  | 153,85 | 100              |
| chr14 | 55369040  | 55369430  | GCH1   | NM_000161    | 6  | 6  | 1     | 343         | 57   | 2541   | 6,5    | 99,7             |
| chr14 | 66975086  | 66975289  | GPHN   | NM_020806    | 23 | 23 | 1     | 64          | 59   | 2472   | 12,12  | 68,8             |
| chr14 | 67147748  | 67147927  | GPHN   | NM_020806    | 23 | 23 | 2     | 79          | 126  | 5257   | 29,21  | 100              |
| chr14 | 67243071  | 67243295  | GPHN   | NM_020806    | 23 | 23 | 3     | 58          | 421  | 17920  | 79,64  | 100              |
| chr14 | 67291092  | 67291310  | GPHN   | NM_020806    | 23 | 23 | 4     | 93          | 556  | 24559  | 112,14 | 100              |
| chr14 | 67346585  | 67346758  | GPHN   | NM_020806    | 23 | 23 | 5     | 95          | 157  | 6260   | 35,98  | 100              |
| chr14 | 67382658  | 67382861  | GPHN   | NM_020806    | 23 | 23 | 6     | 67          | 299  | 13713  | 67,22  | 100              |
| chr14 | 67389366  | 67389649  | GPHN   | NM_020806    | 23 | 23 | 7     | 273         | 844  | 37874  | 133,36 | 97,8             |
| chr14 | 67390844  | 67391074  | GPHN   | NM_020806    | 23 | 23 | 8     | 99          | 584  | 25048  | 108,43 | 100              |
| chr14 | 67431949  | 67432149  | GPHN   | NM_020806    | 23 | 23 | 9     | 135         | 1219 | 53758  | 267,45 | 69,6             |
| chr14 | 67490285  | 67490470  | GPHN   | NM_020806    | 23 | 23 | 10    | 43          | 471  | 20656  | 111,05 | 100              |
| chr14 | 67525329  | 67525544  | GPHN   | NM_020806    | 23 | 23 | 11    | 138         | 344  | 15364  | 71,13  | 100              |
| chr14 | 67555627  | 67555821  | GPHN   | NM_020806    | 23 | 23 | 12    | 93          | 383  | 17223  | 88,32  | 100              |
| chr14 | 67567485  | 67567715  | GPHN   | NM_020806    | 23 | 23 | 13    | 56          | 419  | 18802  | 81,39  | 100              |
| chr14 | 67576777  | 67577001  | GPHN   | NM_020806    | 23 | 23 | 14    | 120         | 287  | 12536  | 55,72  | 100              |
| chr14 | 67578485  | 67578685  | GPHN   | NM_020806    | 23 | 23 | 15    | 59          | 347  | 14575  | 72,51  | 100              |
| chr14 | 67579786  | 67579971  | GPHN   | NM_020806    | 23 | 23 | 16    | 154         | 172  | 7900   | 42,47  | 66,9             |
| chr14 | 67588933  | 67589130  | GPHN   | NM_020806    | 23 | 23 | 17    | 122         | 620  | 27502  | 138,9  | 100              |
| chr14 | 67610037  | 67610258  | GPHN   | NM_020806    | 23 | 23 | 18    | 88          | 455  | 19211  | 86,54  | 100              |
| chr14 | 67626071  | 67626262  | GPHN   | NM_020806    | 23 | 23 | 19    | 74          | 146  | 6244   | 32,52  | 100              |
| chr14 | 67631828  | 67632052  | GPHN   | NM_020806    | 23 | 23 | 20    | 65          | 448  | 19066  | 84,74  | 100              |
| chr14 | 67635592  | 67635816  | GPHN   | NM_020806    | 23 | 23 | 21    | 104         | 1442 | 66359  | 294,93 | 100              |
| chr14 | 67646275  | 67646472  | GPHN   | NM_020806    | 23 | 23 | 22    | 97          | 418  | 18313  | 92,49  | 100              |
| chr14 | 67647480  | 67647781  | GPHN   | NM_020806    | 23 | 23 | 23    | 134         | 554  | 25222  | 83,52  | 100              |
| chr14 | 70346419  | 70346616  | SMOC1  | NM_001034852 | 12 | 12 | 1     | 99          | 144  | 5904   | 29,82  | 76,8             |
| chr14 | 70418762  | 70418962  | SMOC1  | NM_001034852 | 12 | 12 | 2     | 166         | 539  | 22790  | 113,38 | 65,1             |
| chr14 | 70420017  | 70420223  | SMOC1  | NM_001034852 | 12 | 12 | 3     | 113         | 335  | 14934  | 72,14  | 77               |

|       |          |          |       |              |    |    |         |           |      |        |        |                  |
|-------|----------|----------|-------|--------------|----|----|---------|-----------|------|--------|--------|------------------|
| chr14 | 70442324 | 70442518 | SMOC1 | NM_001034852 | 12 | 12 | 4       | 100       | 242  | 10233  | 52,48  | 87               |
| chr14 | 70444525 | 70444725 | SMOC1 | NM_001034852 | 12 | 12 | 5       | 48        | 1144 | 50890  | 253,18 | 100              |
| chr14 | 70459079 | 70459282 | SMOC1 | NM_001034852 | 12 | 12 | 6       | 57        | 382  | 17602  | 86,28  | 100              |
| chr14 | 70461086 | 70461286 | SMOC1 | NM_001034852 | 12 | 12 | 7       | 81        | 1368 | 57328  | 285,21 | 100              |
| chr14 | 70477409 | 70477591 | SMOC1 | NM_001034852 | 12 | 12 | 8       | 193       | 339  | 14878  | 81,3   | 62,7             |
| chr14 | 70478100 | 70478303 | SMOC1 | NM_001034852 | 12 | 12 | 9       | 83        | 395  | 16075  | 78,8   | 100              |
| chr14 | 70479995 | 70480180 | SMOC1 | NM_001034852 | 12 | 12 | 10      | 106       | 244  | 10757  | 57,83  | 73,6             |
| chr14 | 70489940 | 70490202 | SMOC1 | NM_001034852 | 12 | 12 | 11      | 245       | 901  | 41862  | 159,17 | 91,8             |
| chr14 | 70496821 | 70496991 | SMOC1 | NM_001034852 | 12 | 12 | 12      | 17        | 174  | 6551   | 38,31  | 100              |
| chr14 | 74753059 | 74753478 | ABCD4 | NM_005050    | 19 | 19 | 19,18   | 69.116    | 1770 | 82394  | 196,18 | 100.0,64.7       |
| chr14 | 74754525 | 74754695 | ABCD4 | NM_005050    | 19 | 19 | 17      | 77        | 317  | 14262  | 83,4   | 84,4             |
| chr14 | 74754853 | 74755074 | ABCD4 | NM_005050    | 19 | 19 | 16      | 53        | 127  | 5157   | 23,23  | 100              |
| chr14 | 74755331 | 74755525 | ABCD4 | NM_005050    | 19 | 19 | 15      | 50        | 227  | 9942   | 50,98  | 100              |
| chr14 | 74756118 | 74756315 | ABCD4 | NM_005050    | 19 | 19 | 14      | 37        | 267  | 10839  | 54,74  | 100              |
| chr14 | 74756750 | 74757255 | ABCD4 | NM_005050    | 19 | 19 | 13,12   | 92.209    | 1871 | 88721  | 175,34 | 78.3,100.0       |
| chr14 | 74759025 | 74759622 | ABCD4 | NM_005050    | 19 | 19 | 11,10,9 | 90,92,122 | 2134 | 100175 | 167,52 | 61.1,100.0,100.0 |
| chr14 | 74759854 | 74760069 | ABCD4 | NM_005050    | 19 | 19 | 8       | 95        | 391  | 16576  | 76,74  | 100              |
| chr14 | 74761778 | 74761972 | ABCD4 | NM_005050    | 19 | 19 | 7       | 51        | 1223 | 52733  | 270,43 | 100              |
| chr14 | 74762447 | 74762650 | ABCD4 | NM_005050    | 19 | 19 | 6       | 126       | 280  | 11161  | 54,71  | 74,6             |
| chr14 | 74763050 | 74763268 | ABCD4 | NM_005050    | 19 | 19 | 5       | 117       | 258  | 10908  | 49,81  | 88               |
| chr14 | 74764659 | 74764853 | ABCD4 | NM_005050    | 19 | 19 | 4       | 140       | 335  | 14593  | 74,84  | 81,4             |
| chr14 | 74766223 | 74766414 | ABCD4 | NM_005050    | 19 | 19 | 3       | 128       | 149  | 6338   | 33,01  | 100              |
| chr14 | 74766766 | 74766981 | ABCD4 | NM_005050    | 19 | 19 | 2       | 119       | 67   | 3127   | 14,48  | 100              |
| chr14 | 74769612 | 74769732 | ABCD4 | NM_005050    | 19 | 19 | 1       | 38        | 37   | 1362   | 11,26  | 10,5             |
| chr14 | 77743644 | 77743838 | POMT2 | NM_013382    | 21 | 21 | 21      | 106       | 232  | 9908   | 50,81  | 100              |
| chr14 | 77744753 | 77744956 | POMT2 | NM_013382    | 21 | 21 | 20      | 115       | 68   | 2817   | 13,81  | 86,1             |
| chr14 | 77745038 | 77745250 | POMT2 | NM_013382    | 21 | 21 | 19      | 141       | 44   | 1984   | 9,31   | 100              |
| chr14 | 77745930 | 77746394 | POMT2 | NM_013382    | 21 | 21 | 18,17   | 106.60    | 305  | 14089  | 30,3   | 100.0,51.7       |
| chr14 | 77746730 | 77746927 | POMT2 | NM_013382    | 21 | 21 | 16      | 72        | 587  | 25219  | 127,37 | 100              |
| chr14 | 77750143 | 77750337 | POMT2 | NM_013382    | 21 | 21 | 15      | 77        | 548  | 22992  | 117,91 | 96,1             |
| chr14 | 77751163 | 77751366 | POMT2 | NM_013382    | 21 | 21 | 14      | 92        | 323  | 13174  | 64,58  | 80,4             |
| chr14 | 77751871 | 77752047 | POMT2 | NM_013382    | 21 | 21 | 13      | 152       | 724  | 30305  | 171,21 | 69,1             |
| chr14 | 77753067 | 77753246 | POMT2 | NM_013382    | 21 | 21 | 12      | 79        | 291  | 12473  | 69,29  | 100              |
| chr14 | 77755093 | 77755293 | POMT2 | NM_013382    | 21 | 21 | 11      | 70        | 205  | 8899   | 44,27  | 100              |
| chr14 | 77757514 | 77757714 | POMT2 | NM_013382    | 21 | 21 | 10      | 67        | 285  | 12933  | 64,34  | 86,6             |
| chr14 | 77762395 | 77762601 | POMT2 | NM_013382    | 21 | 21 | 9       | 110       | 537  | 23337  | 112,74 | 86,4             |
| chr14 | 77765047 | 77765247 | POMT2 | NM_013382    | 21 | 21 | 8       | 83        | 209  | 9797   | 48,74  | 81,9             |
| chr14 | 77765795 | 77766022 | POMT2 | NM_013382    | 21 | 21 | 7       | 107       | 504  | 23466  | 102,92 | 100              |
| chr14 | 77767397 | 77767621 | POMT2 | NM_013382    | 21 | 21 | 6       | 160       | 377  | 17044  | 75,75  | 100              |
| chr14 | 77769194 | 77769403 | POMT2 | NM_013382    | 21 | 21 | 5       | 109       | 523  | 21949  | 104,52 | 85,3             |
| chr14 | 77770919 | 77771116 | POMT2 | NM_013382    | 21 | 21 | 4       | 109       | 50   | 2139   | 10,8   | 75,2             |
| chr14 | 77772643 | 77772822 | POMT2 | NM_013382    | 21 | 21 | 3       | 105       | 531  | 23283  | 129,35 | 100              |
| chr14 | 77778158 | 77778388 | POMT2 | NM_013382    | 21 | 21 | 2       | 85        | 276  | 11585  | 50,15  | 100              |
| chr14 | 77786712 | 77786995 | POMT2 | NM_013382    | 21 | 21 | 1       | 248       | 42   | 1908   | 6,72   | 88,3             |
| chr14 | 89291047 | 89291232 | TTC8  | NM_144596    | 15 | 15 | 1       | 114       | 191  | 7704   | 41,42  | 100              |
| chr14 | 89299948 | 89300136 | TTC8  | NM_144596    | 15 | 15 | 2       | 30        | 278  | 12036  | 63,68  | 100              |
| chr14 | 89305794 | 89305982 | TTC8  | NM_144596    | 15 | 15 | 3       | 121       | 162  | 7270   | 38,47  | 100              |
| chr14 | 89307143 | 89307482 | TTC8  | NM_144596    | 15 | 15 | 4,5     | 64.160    | 1492 | 71010  | 208,85 | 100.0,63.7       |
| chr14 | 89307679 | 89307864 | TTC8  | NM_144596    | 15 | 15 | 6       | 90        | 149  | 5922   | 31,84  | 100              |
| chr14 | 89310041 | 89310250 | TTC8  | NM_144596    | 15 | 15 | 7       | 45        | 124  | 5464   | 26,02  | 100              |
| chr14 | 89319299 | 89319484 | TTC8  | NM_144596    | 15 | 15 | 8       | 86        | 365  | 14926  | 80,25  | 100              |
| chr14 | 89323498 | 89323695 | TTC8  | NM_144596    | 15 | 15 | 9       | 88        | 356  | 15740  | 79,49  | 100              |
| chr14 | 89327532 | 89327705 | TTC8  | NM_144596    | 15 | 15 | 10      | 111       | 298  | 12692  | 72,94  | 100              |
| chr14 | 89336411 | 89336596 | TTC8  | NM_144596    | 15 | 15 | 11      | 140       | 994  | 40386  | 217,13 | 94,3             |
| chr14 | 89337831 | 89338025 | TTC8  | NM_144596    | 15 | 15 | 12      | 175       | 299  | 13020  | 66,77  | 76               |
| chr14 | 89338559 | 89338768 | TTC8  | NM_144596    | 15 | 15 | 13      | 123       | 643  | 27176  | 129,41 | 77,2             |
| chr14 | 89341290 | 89341484 | TTC8  | NM_144596    | 15 | 15 | 14      | 84        | 135  | 6228   | 31,94  | 100              |



|       |           |           |         |           |    |    |                |                    |      |        |        |                              |
|-------|-----------|-----------|---------|-----------|----|----|----------------|--------------------|------|--------|--------|------------------------------|
| chr14 | 89343604  | 89343783  | TTC8    | NM_144596 | 15 | 15 | 15             | 117                | 120  | 4166   | 23,14  | 100                          |
| chr14 | 102431049 | 102431320 | DYNC1H1 | NM_001376 | 78 | 78 | 1              | 256                | 4    | 148    | 0,54   | 92,2                         |
| chr14 | 102441950 | 102442168 | DYNC1H1 | NM_001376 | 78 | 78 | 2              | 88                 | 114  | 4960   | 22,65  | 100                          |
| chr14 | 102445627 | 102445857 | DYNC1H1 | NM_001376 | 78 | 78 | 3              | 174                | 448  | 19777  | 85,61  | 100                          |
| chr14 | 102446010 | 102446299 | DYNC1H1 | NM_001376 | 78 | 78 | 4              | 256                | 704  | 31192  | 107,56 | 95,3                         |
| chr14 | 102446723 | 102446938 | DYNC1H1 | NM_001376 | 78 | 78 | 5              | 187                | 355  | 14611  | 67,64  | 88,2                         |
| chr14 | 102449326 | 102449917 | DYNC1H1 | NM_001376 | 78 | 78 | 6,7            | 272.228            | 833  | 38974  | 65,83  | 100.0,87.3                   |
| chr14 | 102452063 | 102453140 | DYNC1H1 | NM_001376 | 78 | 78 | 8              | 1077               | 3666 | 176241 | 163,49 | 96,4                         |
| chr14 | 102453779 | 102453964 | DYNC1H1 | NM_001376 | 78 | 78 | 9              | 180                | 834  | 33624  | 180,77 | 97,2                         |
| chr14 | 102454951 | 102455139 | DYNC1H1 | NM_001376 | 78 | 78 | 10             | 150                | 481  | 20625  | 109,13 | 66,7                         |
| chr14 | 102457821 | 102457991 | DYNC1H1 | NM_001376 | 78 | 78 | 11             | 147                | 454  | 18838  | 110,16 | 87,1                         |
| chr14 | 102460460 | 102460669 | DYNC1H1 | NM_001376 | 78 | 78 | 12             | 141                | 271  | 11377  | 54,18  | 100                          |
| chr14 | 102460929 | 102461603 | DYNC1H1 | NM_001376 | 78 | 78 | 13,14,15       | 177.111.120        | 2755 | 128890 | 190,95 | 100.0,100.0,71.7             |
| chr14 | 102463285 | 102463556 | DYNC1H1 | NM_001376 | 78 | 78 | 16             | 240                | 434  | 20031  | 73,64  | 77,1                         |
| chr14 | 102466364 | 102466807 | DYNC1H1 | NM_001376 | 78 | 78 | 17,18          | 156.114            | 587  | 27032  | 60,88  | 75.6,100.0                   |
| chr14 | 102467223 | 102467980 | DYNC1H1 | NM_001376 | 78 | 78 | 19,20,21       | 111.210.147        | 2706 | 129187 | 170,43 | 100.0,100.0,74.1             |
| chr14 | 102468924 | 102469361 | DYNC1H1 | NM_001376 | 78 | 78 | 22,23          | 167.174            | 844  | 36744  | 83,89  | 70.1,100.0                   |
| chr14 | 102470767 | 102471533 | DYNC1H1 | NM_001376 | 78 | 78 | 24,25,26       | 166.189.195        | 1545 | 72307  | 94,27  | 100.0,100.0,79.5             |
| chr14 | 102472162 | 102472433 | DYNC1H1 | NM_001376 | 78 | 78 | 27             | 283                | 566  | 26577  | 97,71  | 73,9                         |
| chr14 | 102473270 | 102473479 | DYNC1H1 | NM_001376 | 78 | 78 | 28             | 101                | 230  | 10113  | 48,16  | 100                          |
| chr14 | 102474560 | 102474754 | DYNC1H1 | NM_001376 | 78 | 78 | 29             | 160                | 241  | 9455   | 48,49  | 71,9                         |
| chr14 | 102476191 | 102476474 | DYNC1H1 | NM_001376 | 78 | 78 | 30             | 244                | 753  | 35282  | 124,23 | 95,5                         |
| chr14 | 102476565 | 102476783 | DYNC1H1 | NM_001376 | 78 | 78 | 31             | 184                | 36   | 1453   | 6,63   | 92,9                         |
| chr14 | 102477157 | 102477327 | DYNC1H1 | NM_001376 | 78 | 78 | 32             | 213                | 171  | 7252   | 42,41  | 62,4                         |
| chr14 | 102478238 | 102478542 | DYNC1H1 | NM_001376 | 78 | 78 | 33             | 239                | 1471 | 68010  | 222,98 | 89,1                         |
| chr14 | 102478703 | 102478876 | DYNC1H1 | NM_001376 | 78 | 78 | 34             | 157                | 1076 | 46985  | 270,03 | 66,9                         |
| chr14 | 102481370 | 102481635 | DYNC1H1 | NM_001376 | 78 | 78 | 35             | 228                | 644  | 27718  | 104,2  | 85,1                         |
| chr14 | 102482104 | 102482378 | DYNC1H1 | NM_001376 | 78 | 78 | 36             | 231                | 324  | 14981  | 54,48  | 80,5                         |
| chr14 | 102482652 | 102482855 | DYNC1H1 | NM_001376 | 78 | 78 | 37             | 141                | 355  | 15365  | 75,32  | 100                          |
| chr14 | 102483118 | 102483872 | DYNC1H1 | NM_001376 | 78 | 78 | 38,39,40       | 234.207.122        | 1885 | 89990  | 119,19 | 93.6,100.0,100.0             |
| chr14 | 102484800 | 102485003 | DYNC1H1 | NM_001376 | 78 | 78 | 41             | 166                | 614  | 26320  | 129,02 | 92,8                         |
| chr14 | 102486160 | 102486345 | DYNC1H1 | NM_001376 | 78 | 78 | 42             | 164                | 690  | 29300  | 157,53 | 70,7                         |
| chr14 | 102489117 | 102489305 | DYNC1H1 | NM_001376 | 78 | 78 | 43             | 130                | 871  | 37802  | 200,01 | 77,7                         |
| chr14 | 102492886 | 102493065 | DYNC1H1 | NM_001376 | 78 | 78 | 44             | 134                | 184  | 8012   | 44,51  | 100                          |
| chr14 | 102493437 | 102494428 | DYNC1H1 | NM_001376 | 78 | 78 | 45,46,47,48    | 115.162.215.205    | 3840 | 185431 | 186,93 | 100.0,100.0,100.0,75.6       |
| chr14 | 102495930 | 102496355 | DYNC1H1 | NM_001376 | 78 | 78 | 49,50          | 174.120            | 943  | 45399  | 106,57 | 69.0,100.0                   |
| chr14 | 102496395 | 102496586 | DYNC1H1 | NM_001376 | 78 | 78 | 51             | 121                | 310  | 13120  | 68,33  | 72,7                         |
| chr14 | 102498648 | 102498845 | DYNC1H1 | NM_001376 | 78 | 78 | 52             | 196                | 416  | 17214  | 86,94  | 80,1                         |
| chr14 | 102499340 | 102499762 | DYNC1H1 | NM_001376 | 78 | 78 | 53,54          | 118.216            | 845  | 40305  | 95,28  | 100.0,72.7                   |
| chr14 | 102500350 | 102500870 | DYNC1H1 | NM_001376 | 78 | 78 | 55,56          | 213.128            | 2771 | 130347 | 250,19 | 82.6,100.0                   |
| chr14 | 102502862 | 102503074 | DYNC1H1 | NM_001376 | 78 | 78 | 57             | 154                | 242  | 10768  | 50,55  | 76,6                         |
| chr14 | 102504832 | 102506164 | DYNC1H1 | NM_001376 | 78 | 78 | 58,59,60,61,62 | 147.151.254.135,95 | 5543 | 263468 | 197,65 | 76.2,100.0,100.0,100.0,100.0 |
| chr14 | 102506616 | 102506828 | DYNC1H1 | NM_001376 | 78 | 78 | 63             | 175                | 367  | 16063  | 75,41  | 75,4                         |
| chr14 | 102506914 | 102507096 | DYNC1H1 | NM_001376 | 78 | 78 | 64             | 76                 | 960  | 40739  | 222,62 | 100                          |
| chr14 | 102507902 | 102508090 | DYNC1H1 | NM_001376 | 78 | 78 | 65             | 161                | 238  | 9779   | 51,74  | 100                          |
| chr14 | 102508277 | 102509025 | DYNC1H1 | NM_001376 | 78 | 78 | 66,67,68,69    | 112.61.124.114     | 2775 | 134255 | 179,25 | 100.0,100.0,100.0,47.4       |
| chr14 | 102510121 | 102510351 | DYNC1H1 | NM_001376 | 78 | 78 | 70             | 171                | 634  | 27567  | 119,34 | 81,9                         |
| chr14 | 102510617 | 102511027 | DYNC1H1 | NM_001376 | 78 | 78 | 71,72          | 218.104            | 1257 | 59044  | 143,66 | 97.2,92.3                    |
| chr14 | 102514084 | 102514284 | DYNC1H1 | NM_001376 | 78 | 78 | 73             | 212                | 283  | 12211  | 60,75  | 61,8                         |
| chr14 | 102514778 | 102514957 | DYNC1H1 | NM_001376 | 78 | 78 | 74             | 154                | 379  | 16371  | 90,95  | 68,2                         |
| chr14 | 102515819 | 102516253 | DYNC1H1 | NM_001376 | 78 | 78 | 75,76          | 143.169            | 344  | 14975  | 34,43  | 70.6,100.0                   |
| chr14 | 102516347 | 102516526 | DYNC1H1 | NM_001376 | 78 | 78 | 77             | 128                | 818  | 33448  | 185,82 | 93                           |
| chr14 | 102516810 | 102516986 | DYNC1H1 | NM_001376 | 78 | 78 | 78             | 129                | 792  | 33335  | 188,33 | 70,5                         |
| chr15 | 25584318  | 25584515  | UBE3A   | NM_000462 | 14 | 11 | 14             | 121                | 51   | 2291   | 11,57  | 71,9                         |
| chr15 | 25585278  | 25585454  | UBE3A   | NM_000462 | 14 | 11 | 13             | 144                | 326  | 14546  | 82,18  | 68,1                         |
| chr15 | 25599547  | 25599913  | UBE3A   | NM_000462 | 14 | 11 | 12,11          | 74.156             | 446  | 21622  | 58,92  | 36.5,100.0                   |
| chr15 | 25601092  | 25601286  | UBE3A   | NM_000462 | 14 | 11 | 10             | 165                | 124  | 5301   | 27,18  | 67,9                         |

|       |          |          |         |           |    |    |       |        |      |        |        |             |
|-------|----------|----------|---------|-----------|----|----|-------|--------|------|--------|--------|-------------|
| chr15 | 25601915 | 25602115 | UBE3A   | NM_000462 | 14 | 11 | 9     | 206    | 498  | 21942  | 109,16 | 62,6        |
| chr15 | 25605564 | 25605761 | UBE3A   | NM_000462 | 14 | 11 | 8     | 145    | 130  | 5830   | 29,44  | 76,6        |
| chr15 | 25615640 | 25615760 | UBE3A   | NM_000462 | 14 | 11 | 7     | 1247   | 334  | 12137  | 100,31 | 3,8         |
| chr15 | 25615815 | 25616332 | UBE3A   | NM_000462 | 14 | 11 | 7     | 1247   | 1616 | 77237  | 149,11 | 41,5        |
| chr15 | 25616455 | 25616575 | UBE3A   | NM_000462 | 14 | 11 | 7     | 1247   | 215  | 7682   | 63,49  | 9,7         |
| chr15 | 25616707 | 25616880 | UBE3A   | NM_000462 | 14 | 11 | 7     | 1247   | 254  | 11660  | 67,01  | 14          |
| chr15 | 25620595 | 25620976 | UBE3A   | NM_000462 | 14 | 11 | 6     | 299    | 642  | 28626  | 74,94  | 100         |
| chr15 | 25650512 | 25650682 | UBE3A   | NM_000462 | 14 | 11 | 5     | 42     | 182  | 7094   | 41,49  | 100         |
| chr15 | 25653671 | 25653877 | UBE3A   | NM_000462 | 14 | 11 | 4     | 29     | 227  | 10148  | 49,02  | 100         |
| chr15 | 25654092 | 25654268 | UBE3A   | NM_000462 | 14 | 11 | 3     | 120    | 87   | 3784   | 21,38  | 28,3        |
| chr15 | 34525985 | 34526161 | SLC12A6 | NM_133647 | 25 | 25 | 25    | 92     | 2102 | 83281  | 470,51 | 87          |
| chr15 | 34527420 | 34527611 | SLC12A6 | NM_133647 | 25 | 25 | 24    | 134    | 402  | 18067  | 94,1   | 71,6        |
| chr15 | 34528276 | 34528467 | SLC12A6 | NM_133647 | 25 | 25 | 23    | 185    | 454  | 19863  | 103,45 | 67,6        |
| chr15 | 34528919 | 34529116 | SLC12A6 | NM_133647 | 25 | 25 | 22    | 108    | 187  | 8078   | 40,8   | 90,7        |
| chr15 | 34529660 | 34529851 | SLC12A6 | NM_133647 | 25 | 25 | 21    | 132    | 204  | 8379   | 43,64  | 69,7        |
| chr15 | 34530357 | 34530542 | SLC12A6 | NM_133647 | 25 | 25 | 20    | 170    | 512  | 20541  | 110,44 | 64,7        |
| chr15 | 34531238 | 34531438 | SLC12A6 | NM_133647 | 25 | 25 | 19    | 196    | 792  | 33993  | 169,12 | 63,3        |
| chr15 | 34532800 | 34533027 | SLC12A6 | NM_133647 | 25 | 25 | 18    | 169    | 409  | 18796  | 82,44  | 98,2        |
| chr15 | 34533370 | 34533597 | SLC12A6 | NM_133647 | 25 | 25 | 17    | 105    | 200  | 8706   | 38,18  | 100         |
| chr15 | 34534235 | 34534432 | SLC12A6 | NM_133647 | 25 | 25 | 16    | 120    | 106  | 4849   | 24,49  | 100         |
| chr15 | 34536081 | 34536305 | SLC12A6 | NM_133647 | 25 | 25 | 15    | 99     | 129  | 5733   | 25,48  | 100         |
| chr15 | 34537435 | 34537641 | SLC12A6 | NM_133647 | 25 | 25 | 14    | 119    | 294  | 12557  | 60,66  | 100         |
| chr15 | 34537814 | 34538017 | SLC12A6 | NM_133647 | 25 | 25 | 13    | 175    | 229  | 9247   | 45,33  | 70,9        |
| chr15 | 34542412 | 34542624 | SLC12A6 | NM_133647 | 25 | 25 | 12    | 58     | 331  | 13838  | 64,97  | 100         |
| chr15 | 34542758 | 34543192 | SLC12A6 | NM_133647 | 25 | 25 | 11,10 | 99.159 | 1076 | 51448  | 118,27 | 100.0,58.5  |
| chr15 | 34544377 | 34544571 | SLC12A6 | NM_133647 | 25 | 25 | 9     | 215    | 189  | 7760   | 39,79  | 90,7        |
| chr15 | 34546460 | 34546746 | SLC12A6 | NM_133647 | 25 | 25 | 8     | 242    | 242  | 10377  | 36,16  | 81,8        |
| chr15 | 34547421 | 34547636 | SLC12A6 | NM_133647 | 25 | 25 | 7     | 131    | 346  | 14768  | 68,37  | 100         |
| chr15 | 34548350 | 34548559 | SLC12A6 | NM_133647 | 25 | 25 | 6     | 55     | 472  | 20078  | 95,61  | 100         |
| chr15 | 34549830 | 34550018 | SLC12A6 | NM_133647 | 25 | 25 | 5     | 147    | 294  | 13170  | 69,68  | 100         |
| chr15 | 34550913 | 34551107 | SLC12A6 | NM_133647 | 25 | 25 | 4     | 132    | 696  | 30045  | 154,08 | 71,2        |
| chr15 | 34553148 | 34553321 | SLC12A6 | NM_133647 | 25 | 25 | 3     | 95     | 192  | 7840   | 45,06  | 77,9        |
| chr15 | 34567410 | 34567607 | SLC12A6 | NM_133647 | 25 | 25 | 2     | 45     | 52   | 2088   | 10,55  | 100         |
| chr15 | 34628653 | 34628951 | SLC12A6 | NM_133647 | 25 | 25 | 1     | 271    | 1071 | 47527  | 158,95 | 84,5        |
| chr15 | 38545356 | 38545577 | SPRED1  | NM_152594 | 7  | 7  | 1     | 32     | 666  | 29405  | 132,45 | 100         |
| chr15 | 38591561 | 38591782 | SPRED1  | NM_152594 | 7  | 7  | 2     | 175    | 217  | 9286   | 41,83  | 100         |
| chr15 | 38614440 | 38614628 | SPRED1  | NM_152594 | 7  | 7  | 3     | 169    | 299  | 12409  | 65,66  | 100         |
| chr15 | 38616901 | 38617077 | SPRED1  | NM_152594 | 7  | 7  | 4     | 47     | 97   | 3837   | 21,68  | 100         |
| chr15 | 38631916 | 38632110 | SPRED1  | NM_152594 | 7  | 7  | 5     | 159    | 339  | 15277  | 78,34  | 100         |
| chr15 | 38641588 | 38641758 | SPRED1  | NM_152594 | 7  | 7  | 6     | 102    | 257  | 11215  | 65,58  | 100         |
| chr15 | 38643139 | 38643804 | SPRED1  | NM_152594 | 7  | 7  | 7     | 651    | 2298 | 108413 | 162,78 | 90,6        |
| chr15 | 40457204 | 40457395 | BUB1B   | NM_001211 | 23 | 23 | 2     | 144    | 282  | 12167  | 63,37  | 98,6        |
| chr15 | 40462287 | 40462472 | BUB1B   | NM_001211 | 23 | 23 | 3     | 60     | 273  | 11077  | 59,55  | 60          |
| chr15 | 40462667 | 40462873 | BUB1B   | NM_001211 | 23 | 23 | 4     | 145    | 218  | 9045   | 43,7   | 93,8        |
| chr15 | 40468678 | 40468860 | BUB1B   | NM_001211 | 23 | 23 | 5     | 197    | 493  | 21672  | 118,43 | 92,9        |
| chr15 | 40475941 | 40476135 | BUB1B   | NM_001211 | 23 | 23 | 6     | 170    | 337  | 14827  | 76,04  | 84,7        |
| chr15 | 40477356 | 40477879 | BUB1B   | NM_001211 | 23 | 23 | 7,8   | 215,92 | 691  | 32924  | 62,83  | 100.0,100.0 |
| chr15 | 40488723 | 40489003 | BUB1B   | NM_001211 | 23 | 23 | 9     | 230    | 293  | 13219  | 47,04  | 100         |
| chr15 | 40491747 | 40491938 | BUB1B   | NM_001211 | 23 | 23 | 10    | 113    | 141  | 6359   | 33,12  | 100         |
| chr15 | 40492402 | 40492596 | BUB1B   | NM_001211 | 23 | 23 | 11    | 116    | 307  | 13009  | 66,71  | 100         |
| chr15 | 40493053 | 40493247 | BUB1B   | NM_001211 | 23 | 23 | 12    | 50     | 273  | 11087  | 56,86  | 100         |
| chr15 | 40494578 | 40494947 | BUB1B   | NM_001211 | 23 | 23 | 13,14 | 61.106 | 545  | 26000  | 70,27  | 100.0,100.0 |
| chr15 | 40498366 | 40498616 | BUB1B   | NM_001211 | 23 | 23 | 15    | 275    | 1377 | 65468  | 260,83 | 84,4        |
| chr15 | 40500795 | 40501016 | BUB1B   | NM_001211 | 23 | 23 | 16    | 134    | 392  | 16591  | 74,73  | 100         |
| chr15 | 40501766 | 40501987 | BUB1B   | NM_001211 | 23 | 23 | 17    | 141    | 249  | 10506  | 47,32  | 100         |
| chr15 | 40502218 | 40502424 | BUB1B   | NM_001211 | 23 | 23 | 18    | 101    | 330  | 14237  | 68,78  | 100         |
| chr15 | 40504608 | 40504823 | BUB1B   | NM_001211 | 23 | 23 | 19    | 150    | 108  | 4551   | 21,07  | 82,7        |

|       |          |          |       |           |    |    |     |         |      |       |        |            |
|-------|----------|----------|-------|-----------|----|----|-----|---------|------|-------|--------|------------|
| chr15 | 40505539 | 40505730 | BUB1B | NM_001211 | 23 | 23 | 20  | 143     | 541  | 24912 | 129,75 | 95,8       |
| chr15 | 40509631 | 40509822 | BUB1B | NM_001211 | 23 | 23 | 21  | 172     | 527  | 22845 | 118,98 | 73,3       |
| chr15 | 40510606 | 40510809 | BUB1B | NM_001211 | 23 | 23 | 22  | 107     | 403  | 17338 | 84,99  | 100        |
| chr15 | 40512725 | 40513073 | BUB1B | NM_001211 | 23 | 23 | 23  | 196     | 947  | 44035 | 126,17 | 100        |
| chr15 | 43237391 | 43237736 | UBR1  | NM_174916 | 47 | 47 | 47  | 142     | 587  | 27372 | 79,11  | 100        |
| chr15 | 43242413 | 43242613 | UBR1  | NM_174916 | 47 | 47 | 46  | 102     | 177  | 7949  | 39,55  | 100        |
| chr15 | 43244514 | 43244717 | UBR1  | NM_174916 | 47 | 47 | 45  | 171     | 322  | 14133 | 69,28  | 77,8       |
| chr15 | 43250140 | 43250352 | UBR1  | NM_174916 | 47 | 47 | 44  | 78      | 226  | 10101 | 47,42  | 100        |
| chr15 | 43252698 | 43252898 | UBR1  | NM_174916 | 47 | 47 | 43  | 57      | 191  | 8558  | 42,58  | 98,2       |
| chr15 | 43256095 | 43256286 | UBR1  | NM_174916 | 47 | 47 | 42  | 109     | 370  | 17507 | 91,18  | 100        |
| chr15 | 43258302 | 43258532 | UBR1  | NM_174916 | 47 | 47 | 41  | 134     | 174  | 7113  | 30,79  | 100        |
| chr15 | 43262676 | 43262858 | UBR1  | NM_174916 | 47 | 47 | 40  | 88      | 380  | 16124 | 88,11  | 100        |
| chr15 | 43268886 | 43269092 | UBR1  | NM_174916 | 47 | 47 | 39  | 151     | 164  | 7631  | 36,86  | 100        |
| chr15 | 43270002 | 43270196 | UBR1  | NM_174916 | 47 | 47 | 38  | 68      | 17   | 731   | 3,75   | 100        |
| chr15 | 43276063 | 43276266 | UBR1  | NM_174916 | 47 | 47 | 37  | 97      | 169  | 7960  | 39,02  | 100        |
| chr15 | 43276946 | 43277140 | UBR1  | NM_174916 | 47 | 47 | 36  | 56      | 96   | 3539  | 18,15  | 100        |
| chr15 | 43280945 | 43281163 | UBR1  | NM_174916 | 47 | 47 | 35  | 149     | 297  | 12603 | 57,55  | 98,7       |
| chr15 | 43282145 | 43282342 | UBR1  | NM_174916 | 47 | 47 | 34  | 91      | 69   | 3012  | 15,21  | 100        |
| chr15 | 43290353 | 43290529 | UBR1  | NM_174916 | 47 | 47 | 33  | 98      | 202  | 8394  | 47,42  | 100        |
| chr15 | 43294793 | 43294990 | UBR1  | NM_174916 | 47 | 47 | 32  | 150     | 290  | 11361 | 57,38  | 73,3       |
| chr15 | 43296053 | 43296241 | UBR1  | NM_174916 | 47 | 47 | 31  | 94      | 125  | 5576  | 29,5   | 80,9       |
| chr15 | 43299258 | 43299461 | UBR1  | NM_174916 | 47 | 47 | 30  | 206     | 584  | 23764 | 116,49 | 89,8       |
| chr15 | 43307887 | 43308075 | UBR1  | NM_174916 | 47 | 47 | 29  | 182     | 286  | 11879 | 62,85  | 99,5       |
| chr15 | 43309211 | 43309402 | UBR1  | NM_174916 | 47 | 47 | 28  | 87      | 620  | 26800 | 139,58 | 100        |
| chr15 | 43313470 | 43313670 | UBR1  | NM_174916 | 47 | 47 | 27  | 101     | 182  | 8153  | 40,56  | 100        |
| chr15 | 43314864 | 43315049 | UBR1  | NM_174916 | 47 | 47 | 26  | 100     | 208  | 9477  | 50,95  | 100        |
| chr15 | 43316943 | 43317137 | UBR1  | NM_174916 | 47 | 47 | 25  | 155     | 1068 | 45217 | 231,88 | 71,6       |
| chr15 | 43317436 | 43317633 | UBR1  | NM_174916 | 47 | 47 | 24  | 49      | 269  | 10441 | 52,73  | 100        |
| chr15 | 43318658 | 43318861 | UBR1  | NM_174916 | 47 | 47 | 23  | 103     | 203  | 7219  | 35,39  | 100        |
| chr15 | 43319824 | 43320036 | UBR1  | NM_174916 | 47 | 47 | 22  | 53      | 616  | 24693 | 115,93 | 100        |
| chr15 | 43322094 | 43322288 | UBR1  | NM_174916 | 47 | 47 | 21  | 125     | 546  | 23239 | 119,17 | 100        |
| chr15 | 43324760 | 43324972 | UBR1  | NM_174916 | 47 | 47 | 20  | 64      | 45   | 1848  | 8,68   | 100        |
| chr15 | 43328362 | 43328550 | UBR1  | NM_174916 | 47 | 47 | 19  | 102     | 289  | 12501 | 66,14  | 100        |
| chr15 | 43328658 | 43328843 | UBR1  | NM_174916 | 47 | 47 | 18  | 66      | 94   | 3458  | 18,59  | 100        |
| chr15 | 43329925 | 43330125 | UBR1  | NM_174916 | 47 | 47 | 17  | 111     | 650  | 27528 | 136,96 | 100        |
| chr15 | 43330293 | 43330499 | UBR1  | NM_174916 | 47 | 47 | 16  | 62      | 441  | 18534 | 89,54  | 100        |
| chr15 | 43335390 | 43335602 | UBR1  | NM_174916 | 47 | 47 | 15  | 181     | 798  | 34670 | 162,77 | 100        |
| chr15 | 43339325 | 43339510 | UBR1  | NM_174916 | 47 | 47 | 14  | 129     | 714  | 30102 | 161,84 | 100        |
| chr15 | 43340563 | 43340757 | UBR1  | NM_174916 | 47 | 47 | 13  | 100     | 304  | 13382 | 68,63  | 100        |
| chr15 | 43346873 | 43347097 | UBR1  | NM_174916 | 47 | 47 | 12  | 158     | 744  | 34125 | 151,67 | 100        |
| chr15 | 43348475 | 43348660 | UBR1  | NM_174916 | 47 | 47 | 11  | 99      | 62   | 2393  | 12,87  | 100        |
| chr15 | 43350548 | 43350742 | UBR1  | NM_174916 | 47 | 47 | 10  | 89      | 166  | 7215  | 37     | 89,9       |
| chr15 | 43351233 | 43351430 | UBR1  | NM_174916 | 47 | 47 | 9   | 108     | 183  | 8427  | 42,56  | 100        |
| chr15 | 43351876 | 43352046 | UBR1  | NM_174916 | 47 | 47 | 8   | 124     | 375  | 16360 | 95,67  | 100        |
| chr15 | 43352183 | 43352374 | UBR1  | NM_174916 | 47 | 47 | 7   | 63      | 397  | 17325 | 90,23  | 100        |
| chr15 | 43360049 | 43360246 | UBR1  | NM_174916 | 47 | 47 | 6   | 139     | 77   | 3209  | 16,21  | 100        |
| chr15 | 43362930 | 43363118 | UBR1  | NM_174916 | 47 | 47 | 5   | 131     | 911  | 40672 | 215,2  | 96,2       |
| chr15 | 43367146 | 43367331 | UBR1  | NM_174916 | 47 | 47 | 4   | 111     | 545  | 23739 | 127,63 | 100        |
| chr15 | 43374777 | 43374971 | UBR1  | NM_174916 | 47 | 47 | 3   | 79      | 577  | 24584 | 126,07 | 100        |
| chr15 | 43378175 | 43378449 | UBR1  | NM_174916 | 47 | 47 | 2   | 257     | 643  | 29844 | 108,52 | 100        |
| chr15 | 43398070 | 43398246 | UBR1  | NM_174916 | 47 | 47 | 1   | 81      | 354  | 13930 | 78,7   | 100        |
| chr15 | 45654148 | 45654502 | GATM  | NM_001482 | 9  | 9  | 9   | 113     | 907  | 42701 | 120,28 | 100        |
| chr15 | 45656096 | 45656305 | GATM  | NM_001482 | 9  | 9  | 8   | 117     | 300  | 12910 | 61,48  | 100        |
| chr15 | 45656902 | 45657090 | GATM  | NM_001482 | 9  | 9  | 7   | 64      | 398  | 15734 | 83,25  | 100        |
| chr15 | 45658286 | 45658782 | GATM  | NM_001482 | 9  | 9  | 6,5 | 165.138 | 988  | 45241 | 91,03  | 74,5,100.0 |
| chr15 | 45660337 | 45660510 | GATM  | NM_001482 | 9  | 9  | 4   | 191     | 200  | 8494  | 48,82  | 63,9       |
| chr15 | 45661518 | 45661733 | GATM  | NM_001482 | 9  | 9  | 3   | 196     | 273  | 11843 | 54,83  | 100        |

|       |          |          |      |           |    |    |       |         |      |       |        |             |
|-------|----------|----------|------|-----------|----|----|-------|---------|------|-------|--------|-------------|
| chr15 | 45668812 | 45669113 | GATM | NM_001482 | 9  | 9  | 2     | 219     | 416  | 18704 | 61,93  | 94,1        |
| chr15 | 45670619 | 45670914 | GATM | NM_001482 | 9  | 9  | 1     | 69      | 4    | 132   | 0,45   | 47,8        |
| chr15 | 48703167 | 48703613 | FBN1 | NM_000138 | 66 | 65 | 66    | 390     | 622  | 30039 | 67,2   | 100         |
| chr15 | 48704770 | 48704979 | FBN1 | NM_000138 | 66 | 65 | 65    | 175     | 823  | 37142 | 176,87 | 97,7        |
| chr15 | 48707636 | 48707940 | FBN1 | NM_000138 | 66 | 65 | 64    | 232     | 937  | 41618 | 136,45 | 89,7        |
| chr15 | 48712777 | 48712971 | FBN1 | NM_000138 | 66 | 65 | 63    | 120     | 841  | 35759 | 183,38 | 73,3        |
| chr15 | 48713772 | 48713978 | FBN1 | NM_000138 | 66 | 65 | 62    | 129     | 300  | 13570 | 65,56  | 86,8        |
| chr15 | 48714079 | 48714285 | FBN1 | NM_000138 | 66 | 65 | 61    | 117     | 377  | 16826 | 81,29  | 100         |
| chr15 | 48717586 | 48717789 | FBN1 | NM_000138 | 66 | 65 | 60    | 123     | 163  | 7167  | 35,13  | 83,7        |
| chr15 | 48717883 | 48718065 | FBN1 | NM_000138 | 66 | 65 | 59    | 126     | 432  | 18362 | 100,34 | 100         |
| chr15 | 48719836 | 48720205 | FBN1 | NM_000138 | 66 | 65 | 58    | 207     | 509  | 23140 | 62,54  | 65,2        |
| chr15 | 48720550 | 48720732 | FBN1 | NM_000138 | 66 | 65 | 57    | 126     | 586  | 25860 | 141,31 | 94,4        |
| chr15 | 48722839 | 48723018 | FBN1 | NM_000138 | 66 | 65 | 56    | 132     | 1978 | 80634 | 447,97 | 100         |
| chr15 | 48725092 | 48725274 | FBN1 | NM_000138 | 66 | 65 | 55    | 123     | 405  | 17497 | 95,61  | 76,4        |
| chr15 | 48726756 | 48726953 | FBN1 | NM_000138 | 66 | 65 | 54    | 120     | 113  | 4761  | 24,05  | 100         |
| chr15 | 48729121 | 48729312 | FBN1 | NM_000138 | 66 | 65 | 53    | 117     | 104  | 4642  | 24,18  | 100         |
| chr15 | 48729442 | 48729666 | FBN1 | NM_000138 | 66 | 65 | 52    | 66      | 213  | 9749  | 43,33  | 100         |
| chr15 | 48730014 | 48730199 | FBN1 | NM_000138 | 66 | 65 | 51    | 150     | 751  | 30362 | 163,24 | 67,3        |
| chr15 | 48733955 | 48734140 | FBN1 | NM_000138 | 66 | 65 | 50    | 126     | 565  | 23061 | 123,98 | 70,6        |
| chr15 | 48736739 | 48736918 | FBN1 | NM_000138 | 66 | 65 | 49    | 120     | 66   | 2760  | 15,33  | 99,2        |
| chr15 | 48737611 | 48737781 | FBN1 | NM_000138 | 66 | 65 | 48    | 129     | 646  | 28918 | 169,11 | 70,5        |
| chr15 | 48738851 | 48739060 | FBN1 | NM_000138 | 66 | 65 | 47    | 117     | 312  | 13058 | 62,18  | 100         |
| chr15 | 48740939 | 48741118 | FBN1 | NM_000138 | 66 | 65 | 46    | 126     | 508  | 20443 | 113,57 | 100         |
| chr15 | 48744794 | 48744976 | FBN1 | NM_000138 | 66 | 65 | 45    | 123     | 176  | 7926  | 43,31  | 71,5        |
| chr15 | 48748751 | 48748927 | FBN1 | NM_000138 | 66 | 65 | 44    | 123     | 486  | 20341 | 114,92 | 74,6        |
| chr15 | 48752363 | 48752593 | FBN1 | NM_000138 | 66 | 65 | 43    | 72      | 269  | 12724 | 55,08  | 100         |
| chr15 | 48755323 | 48755511 | FBN1 | NM_000138 | 66 | 65 | 42    | 159     | 176  | 7292  | 38,58  | 72,3        |
| chr15 | 48756041 | 48756268 | FBN1 | NM_000138 | 66 | 65 | 41    | 123     | 603  | 26108 | 114,51 | 100         |
| chr15 | 48757826 | 48758118 | FBN1 | NM_000138 | 66 | 65 | 40,39 | 126,69  | 500  | 22904 | 78,17  | 51,6,100.0  |
| chr15 | 48760191 | 48760373 | FBN1 | NM_000138 | 66 | 65 | 38    | 165     | 896  | 39573 | 216,25 | 66,1        |
| chr15 | 48760539 | 48760751 | FBN1 | NM_000138 | 66 | 65 | 37    | 123     | 170  | 7178  | 33,7   | 100         |
| chr15 | 48762836 | 48763015 | FBN1 | NM_000138 | 66 | 65 | 36    | 123     | 271  | 11317 | 62,87  | 95,9        |
| chr15 | 48764785 | 48764982 | FBN1 | NM_000138 | 66 | 65 | 35    | 126     | 366  | 15878 | 80,19  | 70,6        |
| chr15 | 48766414 | 48766878 | FBN1 | NM_000138 | 66 | 65 | 34,33 | 123,123 | 1560 | 71609 | 154    | 100,0,100.0 |
| chr15 | 48773817 | 48773999 | FBN1 | NM_000138 | 66 | 65 | 32    | 126     | 191  | 8029  | 43,87  | 100         |
| chr15 | 48775977 | 48776162 | FBN1 | NM_000138 | 66 | 65 | 31    | 126     | 1221 | 52975 | 284,81 | 100         |
| chr15 | 48777510 | 48777710 | FBN1 | NM_000138 | 66 | 65 | 30    | 123     | 509  | 22615 | 112,51 | 100         |
| chr15 | 48779239 | 48779590 | FBN1 | NM_000138 | 66 | 65 | 29,28 | 126,126 | 1113 | 53022 | 150,63 | 100,0,65.1  |
| chr15 | 48780330 | 48780776 | FBN1 | NM_000138 | 66 | 65 | 27,26 | 129,126 | 1855 | 88768 | 198,59 | 84,5,100.0  |
| chr15 | 48781952 | 48782238 | FBN1 | NM_000138 | 66 | 65 | 25    | 228     | 1095 | 48137 | 167,72 | 83,8        |
| chr15 | 48784620 | 48784808 | FBN1 | NM_000138 | 66 | 65 | 24    | 126     | 347  | 14393 | 76,15  | 100         |
| chr15 | 48786250 | 48786450 | FBN1 | NM_000138 | 66 | 65 | 23    | 51      | 148  | 6421  | 31,95  | 98          |
| chr15 | 48787363 | 48787536 | FBN1 | NM_000138 | 66 | 65 | 22    | 138     | 100  | 3885  | 22,33  | 68,8        |
| chr15 | 48787664 | 48787840 | FBN1 | NM_000138 | 66 | 65 | 21    | 120     | 359  | 15798 | 89,25  | 100         |
| chr15 | 48788244 | 48788414 | FBN1 | NM_000138 | 66 | 65 | 20    | 126     | 561  | 23900 | 139,77 | 93,7        |
| chr15 | 48789383 | 48789580 | FBN1 | NM_000138 | 66 | 65 | 19    | 126     | 454  | 18166 | 91,75  | 93,7        |
| chr15 | 48791144 | 48791350 | FBN1 | NM_000138 | 66 | 65 | 18    | 54      | 474  | 19940 | 96,33  | 100         |
| chr15 | 48796019 | 48796222 | FBN1 | NM_000138 | 66 | 65 | 17    | 153     | 86   | 3647  | 17,88  | 77,1        |
| chr15 | 48797113 | 48797313 | FBN1 | NM_000138 | 66 | 65 | 16    | 123     | 553  | 25268 | 125,71 | 74,8        |
| chr15 | 48800715 | 48800894 | FBN1 | NM_000138 | 66 | 65 | 15    | 123     | 425  | 16897 | 93,87  | 94,3        |
| chr15 | 48802173 | 48802385 | FBN1 | NM_000138 | 66 | 65 | 14    | 126     | 650  | 26840 | 126,01 | 100         |
| chr15 | 48805777 | 48805950 | FBN1 | NM_000138 | 66 | 65 | 13    | 120     | 612  | 26970 | 155    | 74,2        |
| chr15 | 48807595 | 48807780 | FBN1 | NM_000138 | 66 | 65 | 12    | 141     | 779  | 31802 | 170,98 | 92,2        |
| chr15 | 48808324 | 48808551 | FBN1 | NM_000138 | 66 | 65 | 11    | 180     | 140  | 6301  | 27,64  | 95,6        |
| chr15 | 48812909 | 48813097 | FBN1 | NM_000138 | 66 | 65 | 10    | 159     | 221  | 9868  | 52,21  | 66,7        |
| chr15 | 48818259 | 48818468 | FBN1 | NM_000138 | 66 | 65 | 9     | 126     | 358  | 15137 | 72,08  | 100         |
| chr15 | 48826254 | 48826469 | FBN1 | NM_000138 | 66 | 65 | 8     | 126     | 258  | 11473 | 53,12  | 100         |

|       |          |          |        |              |    |    |       |         |      |        |        |             |
|-------|----------|----------|--------|--------------|----|----|-------|---------|------|--------|--------|-------------|
| chr15 | 48829869 | 48830069 | FBN1   | NM_000138    | 66 | 65 | 7     | 198     | 172  | 7495   | 37,29  | 69,2        |
| chr15 | 48888418 | 48888639 | FBN1   | NM_000138    | 66 | 65 | 6     | 96      | 511  | 22251  | 100,23 | 100         |
| chr15 | 48892277 | 48892468 | FBN1   | NM_000138    | 66 | 65 | 5     | 96      | 435  | 19905  | 103,67 | 100         |
| chr15 | 48902828 | 48903004 | FBN1   | NM_000138    | 66 | 65 | 4     | 99      | 95   | 3857   | 21,79  | 80,8        |
| chr15 | 48905108 | 48905317 | FBN1   | NM_000138    | 66 | 65 | 3     | 83      | 806  | 36649  | 174,52 | 100         |
| chr15 | 48936751 | 48936951 | FBN1   | NM_000138    | 66 | 65 | 2     | 164     | 615  | 25537  | 127,05 | 90,9        |
| chr15 | 49030455 | 49031520 | CEP152 | NM_001194998 | 27 | 26 | 27    | 1040    | 4554 | 219283 | 205,71 | 99,1        |
| chr15 | 49033794 | 49034012 | CEP152 | NM_001194998 | 27 | 26 | 26    | 104     | 376  | 15761  | 71,97  | 100         |
| chr15 | 49034090 | 49034284 | CEP152 | NM_001194998 | 27 | 26 | 25    | 154     | 756  | 30974  | 158,84 | 91,6        |
| chr15 | 49036391 | 49036600 | CEP152 | NM_001194998 | 27 | 26 | 24    | 104     | 503  | 23048  | 109,75 | 100         |
| chr15 | 49037091 | 49037315 | CEP152 | NM_001194998 | 27 | 26 | 23    | 97      | 89   | 3280   | 14,58  | 100         |
| chr15 | 49040617 | 49040811 | CEP152 | NM_001194998 | 27 | 26 | 22    | 168     | 483  | 20077  | 102,96 | 100         |
| chr15 | 49044493 | 49044720 | CEP152 | NM_001194998 | 27 | 26 | 21    | 121     | 259  | 12261  | 53,78  | 100         |
| chr15 | 49048036 | 49048698 | CEP152 | NM_001194998 | 27 | 26 | 20    | 651     | 2523 | 122068 | 184,11 | 92          |
| chr15 | 49052327 | 49052527 | CEP152 | NM_001194998 | 27 | 26 | 19    | 132     | 1477 | 66329  | 330    | 100         |
| chr15 | 49054603 | 49054868 | CEP152 | NM_001194998 | 27 | 26 | 18    | 282     | 702  | 33136  | 124,57 | 94,3        |
| chr15 | 49059199 | 49059633 | CEP152 | NM_001194998 | 27 | 26 | 17,16 | 133.129 | 1614 | 72333  | 166,28 | 100.0,79.1  |
| chr15 | 49060310 | 49060501 | CEP152 | NM_001194998 | 27 | 26 | 15    | 110     | 98   | 4206   | 21,91  | 78,2        |
| chr15 | 49061151 | 49061336 | CEP152 | NM_001194998 | 27 | 26 | 14    | 126     | 67   | 2918   | 15,69  | 100         |
| chr15 | 49064685 | 49064900 | CEP152 | NM_001194998 | 27 | 26 | 13    | 205     | 453  | 19984  | 92,52  | 99,5        |
| chr15 | 49073305 | 49073511 | CEP152 | NM_001194998 | 27 | 26 | 12    | 164     | 782  | 36454  | 176,11 | 72,6        |
| chr15 | 49074347 | 49074535 | CEP152 | NM_001194998 | 27 | 26 | 11    | 92      | 558  | 24261  | 128,37 | 88          |
| chr15 | 49076173 | 49076358 | CEP152 | NM_001194998 | 27 | 26 | 10    | 148     | 120  | 4908   | 26,39  | 98          |
| chr15 | 49080949 | 49081134 | CEP152 | NM_001194998 | 27 | 26 | 9     | 201     | 486  | 20747  | 111,54 | 68,2        |
| chr15 | 49083463 | 49083660 | CEP152 | NM_001194998 | 27 | 26 | 8     | 140     | 383  | 17073  | 86,23  | 79,3        |
| chr15 | 49085445 | 49085663 | CEP152 | NM_001194998 | 27 | 26 | 7     | 141     | 166  | 6702   | 30,6   | 100         |
| chr15 | 49088181 | 49088387 | CEP152 | NM_001194998 | 27 | 26 | 6     | 151     | 220  | 9642   | 46,58  | 100         |
| chr15 | 49089555 | 49089995 | CEP152 | NM_001194998 | 27 | 26 | 5,4   | 279,70  | 1058 | 51519  | 116,82 | 79.6,100.0  |
| chr15 | 49090168 | 49090356 | CEP152 | NM_001194998 | 27 | 26 | 3     | 104     | 596  | 26870  | 142,17 | 77,9        |
| chr15 | 49097738 | 49097947 | CEP152 | NM_001194998 | 27 | 26 | 2     | 87      | 116  | 5165   | 24,6   | 100         |
| chr15 | 51200974 | 51201180 | AP4E1  | NM_007347    | 21 | 21 | 1     | 150     | 7    | 238    | 1,15   | 100         |
| chr15 | 51204255 | 51204446 | AP4E1  | NM_007347    | 21 | 21 | 2     | 72      | 166  | 7009   | 36,51  | 100         |
| chr15 | 51207618 | 51207809 | AP4E1  | NM_007347    | 21 | 21 | 3     | 124     | 739  | 30868  | 160,77 | 100         |
| chr15 | 51216133 | 51216324 | AP4E1  | NM_007347    | 21 | 21 | 4     | 74      | 265  | 11912  | 62,04  | 93,2        |
| chr15 | 51217231 | 51217419 | AP4E1  | NM_007347    | 21 | 21 | 5     | 122     | 355  | 14749  | 78,04  | 100         |
| chr15 | 51221215 | 51221409 | AP4E1  | NM_007347    | 21 | 21 | 6     | 160     | 308  | 13622  | 69,86  | 94,4        |
| chr15 | 51222978 | 51223187 | AP4E1  | NM_007347    | 21 | 21 | 7     | 167     | 180  | 7496   | 35,7   | 100         |
| chr15 | 51226769 | 51226954 | AP4E1  | NM_007347    | 21 | 21 | 8     | 74      | 236  | 11069  | 59,51  | 100         |
| chr15 | 51233622 | 51233982 | AP4E1  | NM_007347    | 21 | 21 | 9,10  | 123.110 | 506  | 22919  | 63,49  | 100.0,100.0 |
| chr15 | 51240258 | 51240446 | AP4E1  | NM_007347    | 21 | 21 | 11    | 140     | 310  | 12449  | 65,87  | 70,7        |
| chr15 | 51242014 | 51242380 | AP4E1  | NM_007347    | 21 | 21 | 12,13 | 113.119 | 1160 | 53068  | 144,6  | 100.0,100.0 |
| chr15 | 51250713 | 51251070 | AP4E1  | NM_007347    | 21 | 21 | 14    | 303     | 1107 | 52962  | 147,94 | 92,1        |
| chr15 | 51260425 | 51260631 | AP4E1  | NM_007347    | 21 | 21 | 15    | 115     | 364  | 16226  | 78,39  | 100         |
| chr15 | 51276189 | 51276392 | AP4E1  | NM_007347    | 21 | 21 | 16    | 124     | 310  | 13972  | 68,49  | 100         |
| chr15 | 51285545 | 51285837 | AP4E1  | NM_007347    | 21 | 21 | 17    | 256     | 359  | 16477  | 56,24  | 100         |
| chr15 | 51289516 | 51290098 | AP4E1  | NM_007347    | 21 | 21 | 18    | 558     | 1806 | 86228  | 147,9  | 100         |
| chr15 | 51291203 | 51291388 | AP4E1  | NM_007347    | 21 | 21 | 19    | 191     | 227  | 9385   | 50,46  | 62,8        |
| chr15 | 51293234 | 51293422 | AP4E1  | NM_007347    | 21 | 21 | 20    | 158     | 383  | 15824  | 83,72  | 93          |
| chr15 | 51294636 | 51294863 | AP4E1  | NM_007347    | 21 | 21 | 21    | 161     | 724  | 31911  | 139,96 | 100         |
| chr15 | 52605804 | 52606099 | MYO5A  | NM_000259    | 41 | 41 | 41    | 153     | 303  | 13764  | 46,5   | 100         |
| chr15 | 52606304 | 52606531 | MYO5A  | NM_000259    | 41 | 41 | 40    | 81      | 174  | 8050   | 35,31  | 100         |
| chr15 | 52609255 | 52609461 | MYO5A  | NM_000259    | 41 | 41 | 39    | 175     | 588  | 25636  | 123,85 | 94,3        |
| chr15 | 52611326 | 52611609 | MYO5A  | NM_000259    | 41 | 41 | 38    | 283     | 962  | 44663  | 157,26 | 75,6        |
| chr15 | 52613599 | 52613784 | MYO5A  | NM_000259    | 41 | 41 | 37    | 151     | 518  | 21839  | 117,41 | 71,5        |
| chr15 | 52615490 | 52615693 | MYO5A  | NM_000259    | 41 | 41 | 36    | 90      | 421  | 18373  | 90,06  | 100         |
| chr15 | 52620037 | 52620216 | MYO5A  | NM_000259    | 41 | 41 | 35    | 155     | 362  | 16142  | 89,68  | 100         |
| chr15 | 52622522 | 52622731 | MYO5A  | NM_000259    | 41 | 41 | 34    | 147     | 140  | 6135   | 29,21  | 100         |

|       |          |          |        |           |    |    |       |        |      |       |        |            |
|-------|----------|----------|--------|-----------|----|----|-------|--------|------|-------|--------|------------|
| chr15 | 52628552 | 52628731 | MYO5A  | NM_000259 | 41 | 41 | 33    | 94     | 312  | 12308 | 68,38  | 76,6       |
| chr15 | 52632322 | 52632516 | MYO5A  | NM_000259 | 41 | 41 | 32    | 199    | 153  | 6382  | 32,73  | 62,3       |
| chr15 | 52635280 | 52635495 | MYO5A  | NM_000259 | 41 | 41 | 31    | 81     | 420  | 17691 | 81,9   | 100        |
| chr15 | 52638567 | 52638776 | MYO5A  | NM_000259 | 41 | 41 | 30    | 101    | 305  | 12873 | 61,3   | 91,1       |
| chr15 | 52640843 | 52641049 | MYO5A  | NM_000259 | 41 | 41 | 29    | 9      | 98   | 4133  | 19,97  | 100        |
| chr15 | 52643490 | 52643773 | MYO5A  | NM_000259 | 41 | 41 | 28    | 228    | 638  | 29293 | 103,14 | 82,9       |
| chr15 | 52645656 | 52645868 | MYO5A  | NM_000259 | 41 | 41 | 27    | 54     | 269  | 11314 | 53,12  | 100        |
| chr15 | 52646111 | 52646311 | MYO5A  | NM_000259 | 41 | 41 | 26    | 144    | 737  | 30288 | 150,69 | 70,1       |
| chr15 | 52652061 | 52652249 | MYO5A  | NM_000259 | 41 | 41 | 25    | 114    | 531  | 21638 | 114,49 | 74,6       |
| chr15 | 52656724 | 52656909 | MYO5A  | NM_000259 | 41 | 41 | 24    | 149    | 325  | 14345 | 77,12  | 100        |
| chr15 | 52659135 | 52659341 | MYO5A  | NM_000259 | 41 | 41 | 23    | 94     | 721  | 31685 | 153,07 | 100        |
| chr15 | 52662346 | 52662617 | MYO5A  | NM_000259 | 41 | 41 | 22    | 249    | 1221 | 56253 | 206,81 | 100        |
| chr15 | 52664240 | 52664508 | MYO5A  | NM_000259 | 41 | 41 | 21    | 240    | 1070 | 47148 | 175,27 | 78,3       |
| chr15 | 52667463 | 52667687 | MYO5A  | NM_000259 | 41 | 41 | 20    | 157    | 243  | 10509 | 46,71  | 100        |
| chr15 | 52668576 | 52668776 | MYO5A  | NM_000259 | 41 | 41 | 19    | 212    | 710  | 29679 | 147,66 | 84,9       |
| chr15 | 52671772 | 52672031 | MYO5A  | NM_000259 | 41 | 41 | 18,17 | 109,87 | 824  | 37096 | 142,68 | 100.0,14.9 |
| chr15 | 52675215 | 52675397 | MYO5A  | NM_000259 | 41 | 41 | 16    | 98     | 195  | 8933  | 48,81  | 100        |
| chr15 | 52676383 | 52676562 | MYO5A  | NM_000259 | 41 | 41 | 15    | 162    | 181  | 7572  | 42,07  | 84,6       |
| chr15 | 52679982 | 52680158 | MYO5A  | NM_000259 | 41 | 41 | 14    | 84     | 169  | 7317  | 41,34  | 100        |
| chr15 | 52681433 | 52681630 | MYO5A  | NM_000259 | 41 | 41 | 13    | 126    | 176  | 7662  | 38,7   | 100        |
| chr15 | 52684039 | 52684224 | MYO5A  | NM_000259 | 41 | 41 | 12    | 141    | 962  | 43470 | 233,71 | 69,5       |
| chr15 | 52688417 | 52688626 | MYO5A  | NM_000259 | 41 | 41 | 11    | 82     | 246  | 9704  | 46,21  | 100        |
| chr15 | 52689333 | 52689598 | MYO5A  | NM_000259 | 41 | 41 | 10    | 266    | 399  | 18552 | 69,74  | 75,6       |
| chr15 | 52697427 | 52697621 | MYO5A  | NM_000259 | 41 | 41 | 9     | 107    | 444  | 19140 | 98,15  | 100        |
| chr15 | 52699412 | 52699618 | MYO5A  | NM_000259 | 41 | 41 | 8     | 108    | 387  | 15803 | 76,34  | 100        |
| chr15 | 52700211 | 52700396 | MYO5A  | NM_000259 | 41 | 41 | 7     | 82     | 269  | 12072 | 64,9   | 100        |
| chr15 | 52702429 | 52702638 | MYO5A  | NM_000259 | 41 | 41 | 6     | 144    | 535  | 22239 | 105,9  | 75,7       |
| chr15 | 52708394 | 52708564 | MYO5A  | NM_000259 | 41 | 41 | 5     | 157    | 322  | 12787 | 74,78  | 66,9       |
| chr15 | 52717992 | 52718198 | MYO5A  | NM_000259 | 41 | 41 | 4     | 145    | 1128 | 48519 | 234,39 | 100        |
| chr15 | 52720535 | 52720717 | MYO5A  | NM_000259 | 41 | 41 | 3     | 172    | 486  | 20004 | 109,31 | 71,5       |
| chr15 | 52725311 | 52725517 | MYO5A  | NM_000259 | 41 | 41 | 2     | 111    | 106  | 4284  | 20,7   | 100        |
| chr15 | 52820904 | 52821187 | MYO5A  | NM_000259 | 41 | 41 | 1     | 27     | 1    | 27    | 0,1    | 100        |
| chr15 | 55497648 | 55497851 | RAB27A | NM_183234 | 7  | 5  | 7     | 199    | 1547 | 67385 | 330,32 | 73,9       |
| chr15 | 55516039 | 55516233 | RAB27A | NM_183234 | 7  | 5  | 6     | 124    | 899  | 38524 | 197,56 | 100        |
| chr15 | 55520767 | 55520949 | RAB27A | NM_183234 | 7  | 5  | 5     | 104    | 250  | 10276 | 56,15  | 100        |
| chr15 | 55522607 | 55522792 | RAB27A | NM_183234 | 7  | 5  | 4     | 86     | 553  | 22719 | 122,15 | 90,7       |
| chr15 | 55526974 | 55527156 | RAB27A | NM_183234 | 7  | 5  | 3     | 153    | 503  | 21909 | 119,72 | 100        |
| chr15 | 66679552 | 66679805 | MAP2K1 | NM_002755 | 11 | 11 | 1     | 80     | 42   | 1984  | 7,81   | 100        |
| chr15 | 66727432 | 66727629 | MAP2K1 | NM_002755 | 11 | 11 | 2     | 211    | 241  | 9964  | 50,32  | 68,2       |
| chr15 | 66729131 | 66729307 | MAP2K1 | NM_002755 | 11 | 11 | 3     | 147    | 805  | 34581 | 195,37 | 68         |
| chr15 | 66735631 | 66735807 | MAP2K1 | NM_002755 | 11 | 11 | 4     | 78     | 196  | 8183  | 46,23  | 83,3       |
| chr15 | 66736994 | 66737164 | MAP2K1 | NM_002755 | 11 | 11 | 5     | 52     | 288  | 11625 | 67,98  | 100        |
| chr15 | 66774129 | 66774305 | MAP2K1 | NM_002755 | 11 | 11 | 6     | 125    | 1781 | 74551 | 421,19 | 71,2       |
| chr15 | 66777483 | 66777603 | MAP2K1 | NM_002755 | 11 | 11 | 7     | 202    | 97   | 3829  | 31,64  | 23,3       |
| chr15 | 66779437 | 66779646 | MAP2K1 | NM_002755 | 11 | 11 | 8     | 65     | 101  | 4533  | 21,59  | 100        |
| chr15 | 66781558 | 66781728 | MAP2K1 | NM_002755 | 11 | 11 | 9     | 62     | 1505 | 62890 | 367,78 | 91,9       |
| chr15 | 66781996 | 66782199 | MAP2K1 | NM_002755 | 11 | 11 | 10    | 46     | 834  | 35075 | 171,94 | 100        |
| chr15 | 66782656 | 66783078 | MAP2K1 | NM_002755 | 11 | 11 | 11    | 114    | 1682 | 75257 | 177,91 | 100        |
| chr15 | 72978385 | 72978615 | BBS4   | NM_033028 | 16 | 16 | 1     | 24     | 1185 | 49082 | 212,48 | 100        |
| chr15 | 72987175 | 72987615 | BBS4   | NM_033028 | 16 | 16 | 2     | 52     | 637  | 30695 | 69,6   | 100        |
| chr15 | 73001968 | 73002183 | BBS4   | NM_033028 | 16 | 16 | 3     | 80     | 205  | 8626  | 39,94  | 100        |
| chr15 | 73004516 | 73004719 | BBS4   | NM_033028 | 16 | 16 | 4     | 64     | 173  | 7471  | 36,62  | 100        |
| chr15 | 73007533 | 73007727 | BBS4   | NM_033028 | 16 | 16 | 5     | 112    | 254  | 9800  | 50,26  | 85,7       |
| chr15 | 73008979 | 73009203 | BBS4   | NM_033028 | 16 | 16 | 6     | 73     | 315  | 14326 | 63,67  | 100        |
| chr15 | 73015034 | 73015237 | BBS4   | NM_033028 | 16 | 16 | 7     | 54     | 206  | 9196  | 45,08  | 100        |
| chr15 | 73016829 | 73017038 | BBS4   | NM_033028 | 16 | 16 | 8     | 128    | 142  | 6420  | 30,57  | 100        |
| chr15 | 73020207 | 73020416 | BBS4   | NM_033028 | 16 | 16 | 9     | 55     | 619  | 28535 | 135,88 | 100        |

|       |          |          |        |              |    |    |       |         |      |        |        |             |
|-------|----------|----------|--------|--------------|----|----|-------|---------|------|--------|--------|-------------|
| chr15 | 73021944 | 73022156 | BBS4   | NM_033028    | 16 | 16 | 10    | 69      | 372  | 15307  | 71,86  | 100         |
| chr15 | 73023705 | 73024142 | BBS4   | NM_033028    | 16 | 16 | 11,12 | 153.172 | 1070 | 50267  | 114,76 | 61.4,100.0  |
| chr15 | 73027365 | 73027550 | BBS4   | NM_033028    | 16 | 16 | 13    | 70      | 90   | 3988   | 21,44  | 100         |
| chr15 | 73028202 | 73028393 | BBS4   | NM_033028    | 16 | 16 | 14    | 142     | 325  | 11598  | 60,41  | 74,6        |
| chr15 | 73029070 | 73029276 | BBS4   | NM_033028    | 16 | 16 | 15    | 202     | 664  | 25972  | 125,47 | 86,1        |
| chr15 | 73029879 | 73030067 | BBS4   | NM_033028    | 16 | 16 | 16    | 110     | 227  | 10061  | 53,23  | 45,5        |
| chr15 | 74472359 | 74472565 | STRA6  | NM_001199042 | 19 | 19 | 19    | 164     | 243  | 10003  | 48,32  | 88,4        |
| chr15 | 74473160 | 74473360 | STRA6  | NM_001199042 | 19 | 19 | 18    | 156     | 224  | 9180   | 45,67  | 76,3        |
| chr15 | 74473671 | 74473874 | STRA6  | NM_001199042 | 19 | 19 | 17    | 164     | 81   | 3603   | 17,66  | 78,7        |
| chr15 | 74474396 | 74474786 | STRA6  | NM_001199042 | 19 | 19 | 16,15 | 102.118 | 287  | 13679  | 34,98  | 100.0,87.3  |
| chr15 | 74476214 | 74476432 | STRA6  | NM_001199042 | 19 | 19 | 14    | 134     | 560  | 24994  | 114,13 | 87,3        |
| chr15 | 74477303 | 74477473 | STRA6  | NM_001199042 | 19 | 19 | 13    | 76      | 175  | 7621   | 44,57  | 100         |
| chr15 | 74481409 | 74481591 | STRA6  | NM_001199042 | 19 | 19 | 12    | 163     | 244  | 9964   | 54,45  | 83,4        |
| chr15 | 74483153 | 74483326 | STRA6  | NM_001199042 | 19 | 19 | 11    | 62      | 215  | 9020   | 51,84  | 100         |
| chr15 | 74483504 | 74483882 | STRA6  | NM_001199042 | 19 | 19 | 10,9  | 77,68   | 710  | 32653  | 86,16  | 100.0,100.0 |
| chr15 | 74486173 | 74486367 | STRA6  | NM_001199042 | 19 | 19 | 8     | 123     | 705  | 29646  | 152,03 | 74          |
| chr15 | 74487714 | 74488065 | STRA6  | NM_001199042 | 19 | 19 | 7,6   | 167,24  | 704  | 32581  | 92,56  | 57.5,100.0  |
| chr15 | 74488378 | 74488593 | STRA6  | NM_001199042 | 19 | 19 | 5     | 140     | 307  | 12981  | 60,1   | 79,3        |
| chr15 | 74489561 | 74489776 | STRA6  | NM_001199042 | 19 | 19 | 4     | 86      | 153  | 6410   | 29,68  | 100         |
| chr15 | 74490055 | 74490261 | STRA6  | NM_001199042 | 19 | 19 | 3     | 67      | 314  | 12823  | 61,95  | 100         |
| chr15 | 74494439 | 74494802 | STRA6  | NM_001199042 | 19 | 19 | 2,1   | 128.102 | 247  | 10151  | 27,89  | 100.0,43.1  |
| chr15 | 85325816 | 85328108 | ZNF592 | NM_014630    | 11 | 8  | 4     | 2220    | 6895 | 330400 | 144,09 | 99,2        |
| chr15 | 85333891 | 85334094 | ZNF592 | NM_014630    | 11 | 8  | 5     | 179     | 1176 | 49067  | 240,52 | 88,8        |
| chr15 | 85341072 | 85341242 | ZNF592 | NM_014630    | 11 | 8  | 6     | 177     | 279  | 11836  | 69,22  | 80,8        |
| chr15 | 85341528 | 85342134 | ZNF592 | NM_014630    | 11 | 8  | 7,8   | 160.288 | 1440 | 66267  | 109,17 | 100.0,100.0 |
| chr15 | 85342215 | 85342433 | ZNF592 | NM_014630    | 11 | 8  | 9     | 113     | 962  | 41486  | 189,43 | 92,9        |
| chr15 | 85342980 | 85343165 | ZNF592 | NM_014630    | 11 | 8  | 10    | 136     | 338  | 14889  | 80,05  | 68,4        |
| chr15 | 85345490 | 85345690 | ZNF592 | NM_014630    | 11 | 8  | 11    | 531     | 707  | 31691  | 157,67 | 25,4        |
| chr15 | 90171544 | 90171975 | KIF7   | NM_198525    | 19 | 18 | 19    | 368     | 368  | 16596  | 38,42  | 88,6        |
| chr15 | 90172149 | 90172358 | KIF7   | NM_198525    | 19 | 18 | 18    | 147     | 677  | 28613  | 136,25 | 100         |
| chr15 | 90172670 | 90172873 | KIF7   | NM_198525    | 19 | 18 | 17    | 199     | 856  | 32300  | 158,33 | 67,8        |
| chr15 | 90173499 | 90173678 | KIF7   | NM_198525    | 19 | 18 | 16    | 207     | 174  | 7306   | 40,59  | 77,8        |
| chr15 | 90174738 | 90175045 | KIF7   | NM_198525    | 19 | 18 | 15    | 216     | 124  | 5044   | 16,38  | 94,4        |
| chr15 | 90176119 | 90176550 | KIF7   | NM_198525    | 19 | 18 | 14,13 | 177.126 | 379  | 17567  | 40,66  | 61.6,100.0  |
| chr15 | 90176990 | 90177190 | KIF7   | NM_198525    | 19 | 18 | 12    | 198     | 265  | 11679  | 58,1   | 63,1        |
| chr15 | 90185470 | 90185664 | KIF7   | NM_198525    | 19 | 18 | 11    | 203     | 6    | 243    | 1,25   | 82,3        |
| chr15 | 90188227 | 90188682 | KIF7   | NM_198525    | 19 | 18 | 10,9  | 153.116 | 680  | 27948  | 61,29  | 100.0,100.0 |
| chr15 | 90189156 | 90189365 | KIF7   | NM_198525    | 19 | 18 | 8     | 134     | 1532 | 64312  | 306,25 | 76,1        |
| chr15 | 90190058 | 90190353 | KIF7   | NM_198525    | 19 | 18 | 7     | 228     | 70   | 2816   | 9,51   | 100         |
| chr15 | 90190828 | 90191055 | KIF7   | NM_198525    | 19 | 18 | 6     | 117     | 436  | 18385  | 80,64  | 99,1        |
| chr15 | 90191503 | 90192023 | KIF7   | NM_198525    | 19 | 18 | 5     | 520     | 16   | 734    | 1,41   | 96,7        |
| chr15 | 90192208 | 90192648 | KIF7   | NM_198525    | 19 | 18 | 4     | 394     | 89   | 4076   | 9,24   | 99,2        |
| chr15 | 90192871 | 90193228 | KIF7   | NM_198525    | 19 | 18 | 3     | 201     | 809  | 37783  | 105,54 | 100         |
| chr15 | 90195769 | 90196117 | KIF7   | NM_198525    | 19 | 18 | 2     | 328     | 341  | 15547  | 44,55  | 86,6        |
| chr15 | 91290507 | 91290701 | BLM    | NM_000057    | 22 | 21 | 2     | 98      | 790  | 36414  | 186,74 | 80,6        |
| chr15 | 91292641 | 91293371 | BLM    | NM_000057    | 22 | 21 | 3     | 701     | 1514 | 72066  | 98,59  | 93,7        |
| chr15 | 91294924 | 91295136 | BLM    | NM_000057    | 22 | 21 | 4     | 160     | 299  | 12839  | 60,28  | 75          |
| chr15 | 91298034 | 91298234 | BLM    | NM_000057    | 22 | 21 | 5     | 128     | 409  | 16450  | 81,84  | 100         |
| chr15 | 91303393 | 91303602 | BLM    | NM_000057    | 22 | 21 | 6     | 133     | 365  | 15866  | 75,55  | 88          |
| chr15 | 91303796 | 91304479 | BLM    | NM_000057    | 22 | 21 | 7     | 662     | 944  | 44976  | 65,75  | 99,1        |
| chr15 | 91306263 | 91306451 | BLM    | NM_000057    | 22 | 21 | 8     | 192     | 436  | 19118  | 101,15 | 65,1        |
| chr15 | 91308454 | 91308669 | BLM    | NM_000057    | 22 | 21 | 9     | 119     | 226  | 9626   | 44,56  | 100         |
| chr15 | 91310066 | 91310254 | BLM    | NM_000057    | 22 | 21 | 10    | 114     | 368  | 16276  | 86,12  | 100         |
| chr15 | 91312242 | 91312448 | BLM    | NM_000057    | 22 | 21 | 11    | 99      | 297  | 13717  | 66,27  | 86,9        |
| chr15 | 91312596 | 91312766 | BLM    | NM_000057    | 22 | 21 | 12    | 149     | 76   | 3169   | 18,53  | 66,4        |
| chr15 | 91326049 | 91326225 | BLM    | NM_000057    | 22 | 21 | 13    | 107     | 181  | 7469   | 42,2   | 100         |
| chr15 | 91328115 | 91328345 | BLM    | NM_000057    | 22 | 21 | 14    | 161     | 524  | 23100  | 100    | 100         |

|       |          |          |         |              |    |    |                   |                             |      |        |        |                                                |
|-------|----------|----------|---------|--------------|----|----|-------------------|-----------------------------|------|--------|--------|------------------------------------------------|
| chr15 | 91333951 | 91334130 | BLM     | NM_000057    | 22 | 21 | 15                | 196                         | 240  | 10567  | 58,71  | 63,3                                           |
| chr15 | 91337396 | 91337596 | BLM     | NM_000057    | 22 | 21 | 16                | 191                         | 188  | 7701   | 38,31  | 100                                            |
| chr15 | 91341432 | 91341608 | BLM     | NM_000057    | 22 | 21 | 17                | 148                         | 89   | 3647   | 20,6   | 91,9                                           |
| chr15 | 91346720 | 91346923 | BLM     | NM_000057    | 22 | 21 | 18                | 200                         | 643  | 26716  | 130,96 | 86,5                                           |
| chr15 | 91347407 | 91347607 | BLM     | NM_000057    | 22 | 21 | 19                | 193                         | 145  | 6405   | 31,87  | 94,8                                           |
| chr15 | 91352369 | 91352542 | BLM     | NM_000057    | 22 | 21 | 20                | 123                         | 381  | 15764  | 90,6   | 98,4                                           |
| chr15 | 91354507 | 91354689 | BLM     | NM_000057    | 22 | 21 | 21                | 202                         | 214  | 9211   | 50,33  | 64,4                                           |
| chr15 | 91358300 | 91358574 | BLM     | NM_000057    | 22 | 21 | 22                | 178                         | 1171 | 52072  | 189,35 | 100                                            |
| chr16 | 771200   | 773240   | CCDC78  | NM_001031737 | 14 | 14 | 14,13,12          | 20,97,67                    | 1405 | 66359  | 32,51  | 100.0,100.0,100.0                              |
| chr16 | 773801   | 775515   | CCDC78  | NM_001031737 | 14 | 14 | 11,10,9,8,7,6,5,4 | 80,100,188,126,79,68,57,168 | 1728 | 82677  | 48,21  | 100.0,100.0,100.0,100.0,100.0,100.0,100.0,61.3 |
| chr16 | 775740   | 776390   | CCDC78  | NM_001031737 | 14 | 14 | 3,2,1             | 87,120,60                   | 871  | 40275  | 61,87  | 100.0,100.0,100.0                              |
| chr16 | 2098547  | 2098735  | TSC2    | NM_000548    | 42 | 41 | 2                 | 138                         | 215  | 9442   | 49,96  | 86,2                                           |
| chr16 | 2100376  | 2100570  | TSC2    | NM_000548    | 42 | 41 | 3                 | 87                          | 511  | 21981  | 112,72 | 100                                            |
| chr16 | 2103400  | 2103914  | TSC2    | NM_000548    | 42 | 41 | 4                 | 111                         | 1690 | 81029  | 157,34 | 48,6                                           |
| chr16 | 2104271  | 2104456  | TSC2    | NM_000548    | 42 | 41 | 5                 | 145                         | 480  | 20377  | 109,55 | 100                                            |
| chr16 | 2105403  | 2105591  | TSC2    | NM_000548    | 42 | 41 | 6                 | 118                         | 418  | 17908  | 94,75  | 100                                            |
| chr16 | 2106090  | 2106293  | TSC2    | NM_000548    | 42 | 41 | 7                 | 49                          | 139  | 6079   | 29,8   | 100                                            |
| chr16 | 2106676  | 2106861  | TSC2    | NM_000548    | 42 | 41 | 8                 | 126                         | 271  | 11325  | 60,89  | 75,4                                           |
| chr16 | 2107066  | 2107269  | TSC2    | NM_000548    | 42 | 41 | 9                 | 74                          | 87   | 3731   | 18,29  | 100                                            |
| chr16 | 2108716  | 2108907  | TSC2    | NM_000548    | 42 | 41 | 10                | 127                         | 94   | 4084   | 21,27  | 100                                            |
| chr16 | 2110624  | 2110812  | TSC2    | NM_000548    | 42 | 41 | 11                | 144                         | 213  | 9247   | 48,93  | 98,6                                           |
| chr16 | 2111834  | 2112025  | TSC2    | NM_000548    | 42 | 41 | 12                | 138                         | 469  | 20501  | 106,78 | 100                                            |
| chr16 | 2112410  | 2112604  | TSC2    | NM_000548    | 42 | 41 | 13                | 104                         | 87   | 3770   | 19,33  | 100                                            |
| chr16 | 2112943  | 2113131  | TSC2    | NM_000548    | 42 | 41 | 14                | 14                          | 77   | 3670   | 19,42  | 100                                            |
| chr16 | 2114247  | 2114444  | TSC2    | NM_000548    | 42 | 41 | 15                | 82                          | 236  | 10285  | 51,94  | 100                                            |
| chr16 | 2115411  | 2115602  | TSC2    | NM_000548    | 42 | 41 | 16                | 117                         | 134  | 5825   | 30,34  | 70,9                                           |
| chr16 | 2120429  | 2120614  | TSC2    | NM_000548    | 42 | 41 | 17                | 123                         | 493  | 22016  | 118,37 | 100                                            |
| chr16 | 2121457  | 2121870  | TSC2    | NM_000548    | 42 | 41 | 18,19             | 107.151                     | 399  | 18294  | 44,19  | 100.0,57.0                                     |
| chr16 | 2122244  | 2122420  | TSC2    | NM_000548    | 42 | 41 | 20                | 123                         | 350  | 13680  | 77,29  | 98,4                                           |
| chr16 | 2122885  | 2123064  | TSC2    | NM_000548    | 42 | 41 | 21                | 135                         | 157  | 6175   | 34,31  | 74,1                                           |
| chr16 | 2124204  | 2124392  | TSC2    | NM_000548    | 42 | 41 | 22                | 190                         | 44   | 2009   | 10,63  | 98,4                                           |
| chr16 | 2125820  | 2126180  | TSC2    | NM_000548    | 42 | 41 | 23,24             | 94.103                      | 642  | 29240  | 81     | 78.7,100.0                                     |
| chr16 | 2126450  | 2126623  | TSC2    | NM_000548    | 42 | 41 | 25                | 95                          | 113  | 4930   | 28,33  | 100                                            |
| chr16 | 2127538  | 2127720  | TSC2    | NM_000548    | 42 | 41 | 26                | 129                         | 315  | 13633  | 74,5   | 94,6                                           |
| chr16 | 2128966  | 2129628  | TSC2    | NM_000548    | 42 | 41 | 27,28,29          | 165.153.113                 | 1093 | 51947  | 78,35  | 100.0,100.0,62.8                               |
| chr16 | 2130096  | 2130326  | TSC2    | NM_000548    | 42 | 41 | 30                | 213                         | 149  | 6172   | 26,72  | 75,6                                           |
| chr16 | 2131543  | 2131743  | TSC2    | NM_000548    | 42 | 41 | 31                | 204                         | 272  | 12025  | 59,83  | 72,5                                           |
| chr16 | 2132370  | 2132561  | TSC2    | NM_000548    | 42 | 41 | 32                | 69                          | 457  | 19816  | 103,21 | 100                                            |
| chr16 | 2133524  | 2133890  | TSC2    | NM_000548    | 42 | 41 | 33                | 122                         | 107  | 4780   | 13,02  | 100                                            |
| chr16 | 2134203  | 2134720  | TSC2    | NM_000548    | 42 | 41 | 34                | 488                         | 405  | 18112  | 34,97  | 100                                            |
| chr16 | 2134904  | 2135086  | TSC2    | NM_000548    | 42 | 41 | 35                | 76                          | 634  | 27279  | 149,07 | 100                                            |
| chr16 | 2135197  | 2135394  | TSC2    | NM_000548    | 42 | 41 | 36                | 93                          | 293  | 13305  | 67,2   | 100                                            |
| chr16 | 2136189  | 2136383  | TSC2    | NM_000548    | 42 | 41 | 37                | 187                         | 90   | 4103   | 21,04  | 100                                            |
| chr16 | 2136735  | 2136929  | TSC2    | NM_000548    | 42 | 41 | 38                | 140                         | 208  | 9285   | 47,62  | 98,6                                           |
| chr16 | 2137874  | 2138664  | TSC2    | NM_000548    | 42 | 41 | 39,40,41,42       | 79,92,99,165                | 944  | 42229  | 53,39  | 87.3,100.0,100.0,100.0                         |
| chr16 | 2546146  | 2547149  | TBC1D24 | NM_001199107 | 8  | 7  | 2                 | 965                         | 1177 | 55959  | 55,74  | 100                                            |
| chr16 | 2547601  | 2547777  | TBC1D24 | NM_001199107 | 8  | 7  | 3                 | 18                          | 196  | 8680   | 49,04  | 100                                            |
| chr16 | 2548196  | 2548387  | TBC1D24 | NM_001199107 | 8  | 7  | 4                 | 159                         | 280  | 11753  | 61,21  | 93,7                                           |
| chr16 | 2549232  | 2549429  | TBC1D24 | NM_001199107 | 8  | 7  | 5                 | 64                          | 1058 | 45492  | 229,76 | 100                                            |
| chr16 | 2549798  | 2549968  | TBC1D24 | NM_001199107 | 8  | 7  | 6                 | 96                          | 238  | 8714   | 50,96  | 100                                            |
| chr16 | 2550269  | 2550546  | TBC1D24 | NM_001199107 | 8  | 7  | 7                 | 223                         | 45   | 1656   | 5,96   | 100                                            |
| chr16 | 2550787  | 2550981  | TBC1D24 | NM_001199107 | 8  | 7  | 8                 | 155                         | 166  | 7562   | 38,78  | 100                                            |
| chr16 | 3777626  | 3779912  | CREBBP  | NM_004380    | 31 | 31 | 31                | 2157                        | 2496 | 117188 | 51,24  | 100                                            |
| chr16 | 3781265  | 3781536  | CREBBP  | NM_004380    | 31 | 31 | 30                | 282                         | 122  | 5361   | 19,71  | 74,5                                           |
| chr16 | 3781799  | 3781987  | CREBBP  | NM_004380    | 31 | 31 | 29                | 162                         | 617  | 26128  | 138,24 | 86,4                                           |
| chr16 | 3786029  | 3786208  | CREBBP  | NM_004380    | 31 | 31 | 28                | 168                         | 396  | 17386  | 96,59  | 100                                            |
| chr16 | 3786558  | 3786773  | CREBBP  | NM_004380    | 31 | 31 | 27                | 166                         | 1010 | 44113  | 204,23 | 74,1                                           |



|       |          |          |        |              |    |    |        |            |      |        |        |                  |
|-------|----------|----------|--------|--------------|----|----|--------|------------|------|--------|--------|------------------|
| chr16 | 3788546  | 3788755  | CREBBP | NM_004380    | 31 | 31 | 26     | 114        | 169  | 7447   | 35,46  | 100              |
| chr16 | 3789596  | 3789772  | CREBBP | NM_004380    | 31 | 31 | 25     | 147        | 430  | 18421  | 104,07 | 88,4             |
| chr16 | 3790416  | 3790616  | CREBBP | NM_004380    | 31 | 31 | 24     | 151        | 291  | 10886  | 54,16  | 89,4             |
| chr16 | 3794810  | 3794992  | CREBBP | NM_004380    | 31 | 31 | 23     | 68         | 283  | 11397  | 62,28  | 100              |
| chr16 | 3795267  | 3795479  | CREBBP | NM_004380    | 31 | 31 | 22     | 78         | 910  | 40772  | 191,42 | 100              |
| chr16 | 3799498  | 3799686  | CREBBP | NM_004380    | 31 | 31 | 21     | 57         | 830  | 37188  | 196,76 | 100              |
| chr16 | 3801594  | 3801791  | CREBBP | NM_004380    | 31 | 31 | 20     | 81         | 365  | 16148  | 81,56  | 80,2             |
| chr16 | 3807187  | 3807414  | CREBBP | NM_004380    | 31 | 31 | 19     | 89         | 373  | 16185  | 70,99  | 100              |
| chr16 | 3807777  | 3808078  | CREBBP | NM_004380    | 31 | 31 | 18     | 240        | 1267 | 61394  | 203,29 | 100              |
| chr16 | 3808756  | 3808941  | CREBBP | NM_004380    | 31 | 31 | 17     | 119        | 123  | 5121   | 27,53  | 73,1             |
| chr16 | 3817754  | 3817930  | CREBBP | NM_004380    | 31 | 31 | 16     | 190        | 492  | 22134  | 125,05 | 82,6             |
| chr16 | 3819218  | 3819439  | CREBBP | NM_004380    | 31 | 31 | 15     | 180        | 587  | 24922  | 112,26 | 76,1             |
| chr16 | 3820609  | 3821061  | CREBBP | NM_004380    | 31 | 31 | 14     | 417        | 206  | 9799   | 21,63  | 90,9             |
| chr16 | 3823807  | 3824007  | CREBBP | NM_004380    | 31 | 31 | 13     | 180        | 263  | 11295  | 56,19  | 69,4             |
| chr16 | 3824585  | 3824776  | CREBBP | NM_004380    | 31 | 31 | 12     | 125        | 224  | 9077   | 47,28  | 88               |
| chr16 | 3827538  | 3827732  | CREBBP | NM_004380    | 31 | 31 | 11     | 45         | 202  | 9144   | 46,89  | 100              |
| chr16 | 3827952  | 3828182  | CREBBP | NM_004380    | 31 | 31 | 10     | 172        | 100  | 4145   | 17,94  | 99,4             |
| chr16 | 3828647  | 3828871  | CREBBP | NM_004380    | 31 | 31 | 9      | 118        | 473  | 21251  | 94,45  | 100              |
| chr16 | 3830777  | 3830980  | CREBBP | NM_004380    | 31 | 31 | 8      | 147        | 450  | 19113  | 93,69  | 70,1             |
| chr16 | 3831125  | 3831337  | CREBBP | NM_004380    | 31 | 31 | 7      | 103        | 108  | 4815   | 22,61  | 100              |
| chr16 | 3832734  | 3833005  | CREBBP | NM_004380    | 31 | 31 | 6      | 243        | 211  | 9159   | 33,67  | 79,8             |
| chr16 | 3841923  | 3842150  | CREBBP | NM_004380    | 31 | 31 | 5      | 114        | 406  | 17005  | 74,58  | 100              |
| chr16 | 3843408  | 3843679  | CREBBP | NM_004380    | 31 | 31 | 4      | 241        | 344  | 15688  | 57,68  | 91,3             |
| chr16 | 3860522  | 3860719  | CREBBP | NM_004380    | 31 | 31 | 3      | 177        | 425  | 18697  | 94,43  | 65,5             |
| chr16 | 3900324  | 3901078  | CREBBP | NM_004380    | 31 | 31 | 2      | 713        | 2076 | 99337  | 131,57 | 96,4             |
| chr16 | 3929831  | 3930031  | CREBBP | NM_004380    | 31 | 31 | 1      | 85         | 23   | 1036   | 5,15   | 100              |
| chr16 | 4847623  | 4848149  | ROGDI  | NM_024589    | 11 | 11 | 10,9,8 | 127,50,114 | 370  | 16380  | 31,08  | 100,0,100,0,68,4 |
| chr16 | 4848557  | 4848748  | ROGDI  | NM_024589    | 11 | 11 | 7      | 99         | 90   | 3862   | 20,11  | 100              |
| chr16 | 4849679  | 4849855  | ROGDI  | NM_024589    | 11 | 11 | 6      | 96         | 358  | 15892  | 89,79  | 100              |
| chr16 | 4850474  | 4850683  | ROGDI  | NM_024589    | 11 | 11 | 5      | 81         | 154  | 6844   | 32,59  | 100              |
| chr16 | 4851237  | 4851618  | ROGDI  | NM_024589    | 11 | 11 | 4,3    | 55,83      | 402  | 19099  | 50     | 100,0,100,0      |
| chr16 | 4851902  | 4852659  | ROGDI  | NM_024589    | 11 | 11 | 2,1    | 72,45      | 766  | 34754  | 45,85  | 100,0,100,0      |
| chr16 | 5121847  | 5122130  | ALG1   | NM_019109    | 13 | 13 | 1      | 208        | 58   | 2578   | 9,08   | 100              |
| chr16 | 5122873  | 5123224  | ALG1   | NM_019109    | 13 | 13 | 2,3    | 78,104     | 2562 | 113200 | 321,59 | 100,0,68,3       |
| chr16 | 5125287  | 5125490  | ALG1   | NM_019109    | 13 | 13 | 4      | 149        | 556  | 24387  | 119,54 | 68,5             |
| chr16 | 5127336  | 5127542  | ALG1   | NM_019109    | 13 | 13 | 5      | 90         | 520  | 22220  | 107,34 | 100              |
| chr16 | 8891459  | 8891810  | PMM2   | NM_000303    | 8  | 8  | 1      | 66         | 205  | 8968   | 25,48  | 100              |
| chr16 | 8895686  | 8895871  | PMM2   | NM_000303    | 8  | 8  | 2      | 112        | 232  | 10082  | 54,2   | 73,2             |
| chr16 | 8898636  | 8898815  | PMM2   | NM_000303    | 8  | 8  | 3      | 77         | 95   | 4056   | 22,53  | 84,4             |
| chr16 | 8900083  | 8900289  | PMM2   | NM_000303    | 8  | 8  | 4      | 92         | 210  | 9010   | 43,53  | 100              |
| chr16 | 8904810  | 8905022  | PMM2   | NM_000303    | 8  | 8  | 5      | 100        | 849  | 37921  | 178,03 | 87               |
| chr16 | 8905504  | 8905686  | PMM2   | NM_000303    | 8  | 8  | 6      | 76         | 540  | 22858  | 124,91 | 88,2             |
| chr16 | 8906865  | 8907056  | PMM2   | NM_000303    | 8  | 8  | 7      | 116        | 659  | 29174  | 151,95 | 85,3             |
| chr16 | 8941557  | 8941828  | PMM2   | NM_000303    | 8  | 8  | 8      | 102        | 156  | 6892   | 25,34  | 100              |
| chr16 | 9856942  | 9858807  | GRIN2A | NM_001134407 | 13 | 12 | 13     | 1800       | 6793 | 329568 | 176,62 | 100              |
| chr16 | 9862701  | 9862996  | GRIN2A | NM_001134407 | 13 | 12 | 12     | 239        | 725  | 30635  | 103,5  | 100              |
| chr16 | 9892127  | 9892336  | GRIN2A | NM_001134407 | 13 | 12 | 11     | 188        | 667  | 28678  | 136,56 | 100              |
| chr16 | 9916148  | 9916375  | GRIN2A | NM_001134407 | 13 | 12 | 10     | 161        | 109  | 5074   | 22,25  | 83,2             |
| chr16 | 9923275  | 9923564  | GRIN2A | NM_001134407 | 13 | 12 | 9      | 230        | 715  | 32100  | 110,69 | 100              |
| chr16 | 9927921  | 9928124  | GRIN2A | NM_001134407 | 13 | 12 | 8      | 126        | 355  | 15433  | 75,65  | 100              |
| chr16 | 9934442  | 9934968  | GRIN2A | NM_001134407 | 13 | 12 | 7,6    | 154,169    | 1850 | 85430  | 162,11 | 100,0,100,0      |
| chr16 | 9943540  | 9943764  | GRIN2A | NM_001134407 | 13 | 12 | 5      | 206        | 1185 | 50332  | 223,7  | 73,8             |
| chr16 | 9984844  | 9985014  | GRIN2A | NM_001134407 | 13 | 12 | 4      | 115        | 307  | 12717  | 74,37  | 99,1             |
| chr16 | 10031883 | 10032486 | GRIN2A | NM_001134407 | 13 | 12 | 3      | 593        | 1798 | 85170  | 141,01 | 88,7             |
| chr16 | 10273753 | 10274261 | GRIN2A | NM_001134407 | 13 | 12 | 2      | 414        | 594  | 27874  | 54,76  | 98,3             |
| chr16 | 15737164 | 15737358 | NDE1   | NM_001143979 | 10 | 8  | 1      | 661        | 1269 | 56082  | 287,6  | 29,5             |
| chr16 | 15758508 | 15758687 | NDE1   | NM_001143979 | 10 | 8  | 3      | 83         | 388  | 16908  | 93,93  | 62,7             |

|       |          |          |           |              |    |    |          |             |       |        |        |                   |
|-------|----------|----------|-----------|--------------|----|----|----------|-------------|-------|--------|--------|-------------------|
| chr16 | 15761074 | 15761244 | NDE1      | NM_001143979 | 10 | 8  | 4        | 154         | 131   | 5604   | 32,77  | 66,2              |
| chr16 | 15771568 | 15771765 | NDE1      | NM_001143979 | 10 | 8  | 5        | 149         | 270   | 12426  | 62,76  | 72,5              |
| chr16 | 15781094 | 15781430 | NDE1      | NM_001143979 | 10 | 8  | 6        | 137         | 1117  | 49307  | 146,31 | 100               |
| chr16 | 15785059 | 15785244 | NDE1      | NM_001143979 | 10 | 8  | 7        | 180         | 441   | 19257  | 103,53 | 67,8              |
| chr16 | 15787978 | 15788187 | NDE1      | NM_001143979 | 10 | 8  | 8        | 92          | 396   | 16741  | 79,72  | 100               |
| chr16 | 15790464 | 15790738 | NDE1      | NM_001143979 | 10 | 8  | 9        | 152         | 404   | 18426  | 67     | 100               |
| chr16 | 15817964 | 15818383 | NDE1      | NM_001143979 | 10 | 8  | 10       | 61          | 1002  | 42499  | 101,19 | 100               |
| chr16 | 23400136 | 23400348 | COG7      | NM_153603    | 17 | 17 | 17       | 167         | 161   | 6626   | 31,11  | 64,7              |
| chr16 | 23403747 | 23403947 | COG7      | NM_153603    | 17 | 17 | 16       | 144         | 868   | 39001  | 194,03 | 68,1              |
| chr16 | 23404585 | 23404770 | COG7      | NM_153603    | 17 | 17 | 15       | 115         | 605   | 26730  | 143,71 | 73                |
| chr16 | 23409281 | 23409481 | COG7      | NM_153603    | 17 | 17 | 14       | 84          | 405   | 16933  | 84,24  | 100               |
| chr16 | 23415056 | 23415247 | COG7      | NM_153603    | 17 | 17 | 13       | 141         | 88    | 3655   | 19,04  | 70,9              |
| chr16 | 23417329 | 23417520 | COG7      | NM_153603    | 17 | 17 | 12       | 187         | 167   | 7341   | 38,23  | 66,3              |
| chr16 | 23421623 | 23421823 | COG7      | NM_153603    | 17 | 17 | 11       | 66          | 533   | 22648  | 112,68 | 89,4              |
| chr16 | 23424672 | 23424851 | COG7      | NM_153603    | 17 | 17 | 10       | 117         | 1359  | 59106  | 328,37 | 70,9              |
| chr16 | 23428336 | 23428536 | COG7      | NM_153603    | 17 | 17 | 9        | 155         | 637   | 26602  | 132,35 | 69                |
| chr16 | 23430059 | 23430232 | COG7      | NM_153603    | 17 | 17 | 8        | 128         | 145   | 6368   | 36,6   | 70,3              |
| chr16 | 23436125 | 23436343 | COG7      | NM_153603    | 17 | 17 | 7        | 199         | 230   | 9760   | 44,57  | 72,4              |
| chr16 | 23444811 | 23445029 | COG7      | NM_153603    | 17 | 17 | 6        | 123         | 1245  | 50913  | 232,48 | 100               |
| chr16 | 23445951 | 23446154 | COG7      | NM_153603    | 17 | 17 | 5        | 83          | 312   | 14238  | 69,79  | 100               |
| chr16 | 23453856 | 23454026 | COG7      | NM_153603    | 17 | 17 | 4        | 169         | 326   | 13569  | 79,35  | 65,7              |
| chr16 | 23456290 | 23456493 | COG7      | NM_153603    | 17 | 17 | 3        | 117         | 703   | 29986  | 146,99 | 100               |
| chr16 | 23457182 | 23457361 | COG7      | NM_153603    | 17 | 17 | 2        | 149         | 69    | 2635   | 14,64  | 67,8              |
| chr16 | 23464172 | 23464381 | COG7      | NM_153603    | 17 | 17 | 1        | 169         | 96    | 3561   | 16,96  | 85,2              |
| chr16 | 30712003 | 30712283 | SRCAP     | NM_006662    | 34 | 32 | 3        | 54          | 332   | 14805  | 52,69  | 100               |
| chr16 | 30715295 | 30715584 | SRCAP     | NM_006662    | 34 | 32 | 4        | 252         | 1156  | 54369  | 187,48 | 79,4              |
| chr16 | 30718454 | 30718666 | SRCAP     | NM_006662    | 34 | 32 | 5        | 186         | 411   | 17572  | 82,5   | 87,6              |
| chr16 | 30718934 | 30719137 | SRCAP     | NM_006662    | 34 | 32 | 6        | 141         | 189   | 8643   | 42,37  | 70,9              |
| chr16 | 30720738 | 30721418 | SRCAP     | NM_006662    | 34 | 32 | 7,8      | 223.278     | 2724  | 132774 | 194,97 | 100,0,88.8        |
| chr16 | 30721900 | 30722500 | SRCAP     | NM_006662    | 34 | 32 | 9,10     | 94,90       | 1159  | 55357  | 92,11  | 100,0,100,0       |
| chr16 | 30722796 | 30723734 | SRCAP     | NM_006662    | 34 | 32 | 11,12,13 | 174.323.178 | 3692  | 172717 | 183,94 | 100,0,100,0,85.4  |
| chr16 | 30723916 | 30724104 | SRCAP     | NM_006662    | 34 | 32 | 13       | 137         | 276   | 11984  | 63,41  | 76,6              |
| chr16 | 30724544 | 30725082 | SRCAP     | NM_006662    | 34 | 32 | 15,16    | 170.193     | 1360  | 65702  | 121,9  | 91.2,100.0        |
| chr16 | 30727343 | 30727774 | SRCAP     | NM_006662    | 34 | 32 | 17,18    | 137.187     | 2531  | 115866 | 268,21 | 100,0,86.1        |
| chr16 | 30731392 | 30731604 | SRCAP     | NM_006662    | 34 | 32 | 19       | 170         | 233   | 10518  | 49,38  | 71,8              |
| chr16 | 30731951 | 30732240 | SRCAP     | NM_006662    | 34 | 32 | 20       | 266         | 328   | 14810  | 51,07  | 77,8              |
| chr16 | 30732561 | 30732868 | SRCAP     | NM_006662    | 34 | 32 | 21       | 288         | 859   | 37980  | 123,31 | 82,3              |
| chr16 | 30733367 | 30733555 | SRCAP     | NM_006662    | 34 | 32 | 22       | 165         | 270   | 11859  | 62,75  | 68,5              |
| chr16 | 30733801 | 30734001 | SRCAP     | NM_006662    | 34 | 32 | 23       | 186         | 281   | 12535  | 62,36  | 63,4              |
| chr16 | 30734216 | 30734505 | SRCAP     | NM_006662    | 34 | 32 | 24       | 267         | 469   | 22360  | 77,1   | 83,1              |
| chr16 | 30734970 | 30736524 | SRCAP     | NM_006662    | 34 | 32 | 25       | 1499        | 9869  | 475557 | 305,82 | 95,7              |
| chr16 | 30740337 | 30740955 | SRCAP     | NM_006662    | 34 | 32 | 26,27    | 266.203     | 1970  | 91933  | 148,52 | 81.2,100.0        |
| chr16 | 30744599 | 30745368 | SRCAP     | NM_006662    | 34 | 32 | 28,29,30 | 170.197.115 | 2225  | 105611 | 137,16 | 100,0,100,0,100.0 |
| chr16 | 30745827 | 30746036 | SRCAP     | NM_006662    | 34 | 32 | 31       | 120         | 408   | 16992  | 80,91  | 91,7              |
| chr16 | 30747440 | 30747892 | SRCAP     | NM_006662    | 34 | 32 | 32,33    | 195,84      | 964   | 45372  | 100,16 | 100,0,36.9        |
| chr16 | 30748431 | 30751123 | SRCAP     | NM_006662    | 34 | 32 | 34       | 2685        | 13670 | 659847 | 245,02 | 97,7              |
| chr16 | 51170906 | 51171447 | SALL1     | NM_002968    | 3  | 3  | 3        | 437         | 1400  | 65635  | 121,1  | 97,3              |
| chr16 | 51172633 | 51175230 | SALL1     | NM_002968    | 3  | 3  | 2        | 3462        | 8620  | 417692 | 160,77 | 75                |
| chr16 | 51175294 | 51176137 | SALL1     | NM_002968    | 3  | 3  | 2        | 3462        | 1309  | 62151  | 73,64  | 22                |
| chr16 | 51185094 | 51185267 | SALL1     | NM_002968    | 3  | 3  | 1        | 76          | 10    | 450    | 2,59   | 77,6              |
| chr16 | 53636015 | 53636191 | RPGRIIP1L | NM_015272    | 27 | 26 | 27       | 113         | 207   | 8834   | 49,91  | 76,1              |
| chr16 | 53639264 | 53639452 | RPGRIIP1L | NM_015272    | 27 | 26 | 26       | 134         | 303   | 12858  | 68,03  | 44,8              |
| chr16 | 53644760 | 53644966 | RPGRIIP1L | NM_015272    | 27 | 26 | 25       | 85          | 660   | 30554  | 147,6  | 100               |
| chr16 | 53652895 | 53653113 | RPGRIIP1L | NM_015272    | 27 | 26 | 24       | 184         | 321   | 13858  | 63,28  | 96,2              |
| chr16 | 53656254 | 53656374 | RPGRIIP1L | NM_015272    | 27 | 26 | 23       | 138         | 17    | 541    | 4,47   | 10,9              |
| chr16 | 53670296 | 53670484 | RPGRIIP1L | NM_015272    | 27 | 26 | 22       | 74          | 257   | 10946  | 57,92  | 100               |
| chr16 | 53671592 | 53671786 | RPGRIIP1L | NM_015272    | 27 | 26 | 21       | 160         | 970   | 41097  | 210,75 | 100               |

|       |          |          |         |              |    |    |       |        |      |       |        |            |
|-------|----------|----------|---------|--------------|----|----|-------|--------|------|-------|--------|------------|
| chr16 | 53672205 | 53672390 | RPGRI1L | NM_015272    | 27 | 26 | 20    | 102    | 360  | 16316 | 87,72  | 100        |
| chr16 | 53674954 | 53675373 | RPGRI1L | NM_015272    | 27 | 26 | 19,18 | 84.191 | 597  | 27365 | 65,15  | 89.3,92.7  |
| chr16 | 53679529 | 53679978 | RPGRI1L | NM_015272    | 27 | 26 | 17    | 379    | 655  | 31125 | 69,17  | 100        |
| chr16 | 53682845 | 53683054 | RPGRI1L | NM_015272    | 27 | 26 | 16    | 152    | 87   | 3590  | 17,1   | 100        |
| chr16 | 53686449 | 53686904 | RPGRI1L | NM_015272    | 27 | 26 | 15    | 453    | 910  | 43659 | 95,74  | 99,6       |
| chr16 | 53690303 | 53690512 | RPGRI1L | NM_015272    | 27 | 26 | 14    | 118    | 373  | 16817 | 80,08  | 100        |
| chr16 | 53691339 | 53691524 | RPGRI1L | NM_015272    | 27 | 26 | 13    | 180    | 148  | 6544  | 35,18  | 88,9       |
| chr16 | 53692229 | 53692408 | RPGRI1L | NM_015272    | 27 | 26 | 12    | 51     | 521  | 21909 | 121,72 | 100        |
| chr16 | 53692702 | 53692905 | RPGRI1L | NM_015272    | 27 | 26 | 11    | 107    | 351  | 13715 | 67,23  | 83,2       |
| chr16 | 53698676 | 53698891 | RPGRI1L | NM_015272    | 27 | 26 | 10    | 140    | 418  | 17680 | 81,85  | 78,6       |
| chr16 | 53705295 | 53705498 | RPGRI1L | NM_015272    | 27 | 26 | 9     | 74     | 196  | 7664  | 37,57  | 100        |
| chr16 | 53706733 | 53706927 | RPGRI1L | NM_015272    | 27 | 26 | 8     | 147    | 192  | 8371  | 42,93  | 99,3       |
| chr16 | 53708920 | 53709108 | RPGRI1L | NM_015272    | 27 | 26 | 7     | 106    | 139  | 6152  | 32,55  | 100        |
| chr16 | 53720340 | 53720531 | RPGRI1L | NM_015272    | 27 | 26 | 6     | 144    | 404  | 17601 | 91,67  | 100        |
| chr16 | 53721737 | 53721910 | RPGRI1L | NM_015272    | 27 | 26 | 5     | 103    | 128  | 5560  | 31,95  | 100        |
| chr16 | 53725967 | 53726333 | RPGRI1L | NM_015272    | 27 | 26 | 4     | 299    | 1247 | 59466 | 162,03 | 100        |
| chr16 | 53730052 | 53730270 | RPGRI1L | NM_015272    | 27 | 26 | 3     | 145    | 463  | 22454 | 102,53 | 100        |
| chr16 | 53734492 | 53734683 | RPGRI1L | NM_015272    | 27 | 26 | 2     | 85     | 190  | 8415  | 43,83  | 100        |
| chr16 | 53844065 | 53844265 | FTO     | NM_001080432 | 9  | 9  | 2     | 78     | 447  | 19440 | 96,72  | 83,3       |
| chr16 | 53859812 | 53860504 | FTO     | NM_001080432 | 9  | 9  | 3     | 628    | 1676 | 80812 | 116,61 | 94,3       |
| chr16 | 53877990 | 53878163 | FTO     | NM_001080432 | 9  | 9  | 4     | 144    | 228  | 9882  | 56,79  | 67,4       |
| chr16 | 53907643 | 53907849 | FTO     | NM_001080432 | 9  | 9  | 5     | 80     | 507  | 21903 | 105,81 | 100        |
| chr16 | 53913697 | 53913891 | FTO     | NM_001080432 | 9  | 9  | 6     | 144    | 189  | 8916  | 45,72  | 94,4       |
| chr16 | 53922628 | 53922828 | FTO     | NM_001080432 | 9  | 9  | 7     | 120    | 645  | 27437 | 136,5  | 70,8       |
| chr16 | 53967855 | 53968070 | FTO     | NM_001080432 | 9  | 9  | 8     | 125    | 259  | 11894 | 55,06  | 100        |
| chr16 | 54145722 | 54145922 | FTO     | NM_001080432 | 9  | 9  | 9     | 154    | 467  | 19587 | 97,45  | 68,8       |
| chr16 | 56518622 | 56518825 | BBS2    | NM_031885    | 17 | 17 | 17    | 107    | 878  | 37528 | 183,96 | 100        |
| chr16 | 56519415 | 56519603 | BBS2    | NM_031885    | 17 | 17 | 16    | 149    | 390  | 15770 | 83,44  | 68,5       |
| chr16 | 56530783 | 56530983 | BBS2    | NM_031885    | 17 | 17 | 15    | 113    | 1819 | 80775 | 401,87 | 92,9       |
| chr16 | 56531608 | 56531781 | BBS2    | NM_031885    | 17 | 17 | 14    | 138    | 707  | 29385 | 168,88 | 92         |
| chr16 | 56532317 | 56532511 | BBS2    | NM_031885    | 17 | 17 | 13    | 132    | 418  | 19106 | 97,98  | 100        |
| chr16 | 56533639 | 56533869 | BBS2    | NM_031885    | 17 | 17 | 12    | 130    | 331  | 14144 | 61,23  | 100        |
| chr16 | 56534793 | 56534972 | BBS2    | NM_031885    | 17 | 17 | 11    | 172    | 151  | 6617  | 36,76  | 84,3       |
| chr16 | 56535188 | 56535364 | BBS2    | NM_031885    | 17 | 17 | 10    | 145    | 256  | 11562 | 65,32  | 69         |
| chr16 | 56536138 | 56536326 | BBS2    | NM_031885    | 17 | 17 | 9     | 140    | 1840 | 82593 | 437    | 70         |
| chr16 | 56536555 | 56536755 | BBS2    | NM_031885    | 17 | 17 | 8     | 136    | 618  | 25919 | 128,95 | 100        |
| chr16 | 56539885 | 56540171 | BBS2    | NM_031885    | 17 | 17 | 7,6   | 87.105 | 650  | 28745 | 100,16 | 73.6,100.0 |
| chr16 | 56543792 | 56543977 | BBS2    | NM_031885    | 17 | 17 | 5     | 78     | 569  | 25675 | 138,04 | 100        |
| chr16 | 56544701 | 56544889 | BBS2    | NM_031885    | 17 | 17 | 4     | 63     | 811  | 36135 | 191,19 | 100        |
| chr16 | 56545033 | 56545239 | BBS2    | NM_031885    | 17 | 17 | 3     | 126    | 436  | 19119 | 92,36  | 100        |
| chr16 | 56548341 | 56548627 | BBS2    | NM_031885    | 17 | 17 | 2     | 228    | 959  | 45174 | 157,4  | 100        |
| chr16 | 56553654 | 56553830 | BBS2    | NM_031885    | 17 | 17 | 1     | 117    | 38   | 1432  | 8,09   | 100        |
| chr16 | 57684191 | 57684406 | GPR56   | NM_005682    | 15 | 13 | 3     | 64     | 358  | 16270 | 75,32  | 100        |
| chr16 | 57685141 | 57685602 | GPR56   | NM_005682    | 15 | 13 | 4     | 423    | 1737 | 81330 | 176,04 | 93,1       |
| chr16 | 57687092 | 57687271 | GPR56   | NM_005682    | 15 | 13 | 5     | 133    | 139  | 5567  | 30,93  | 100        |
| chr16 | 57687856 | 57688035 | GPR56   | NM_005682    | 15 | 13 | 6     | 148    | 254  | 10592 | 58,84  | 93,2       |
| chr16 | 57689327 | 57689548 | GPR56   | NM_005682    | 15 | 13 | 7     | 132    | 187  | 7717  | 34,76  | 87,9       |
| chr16 | 57689730 | 57689900 | GPR56   | NM_005682    | 15 | 13 | 8     | 117    | 1330 | 57938 | 338,82 | 96,6       |
| chr16 | 57690045 | 57690236 | GPR56   | NM_005682    | 15 | 13 | 9     | 46     | 774  | 32405 | 168,78 | 100        |
| chr16 | 57690440 | 57690652 | GPR56   | NM_005682    | 15 | 13 | 10    | 104    | 158  | 6800  | 31,92  | 86,5       |
| chr16 | 57691237 | 57691428 | GPR56   | NM_005682    | 15 | 13 | 11    | 119    | 318  | 13623 | 70,95  | 100        |
| chr16 | 57693324 | 57693604 | GPR56   | NM_005682    | 15 | 13 | 12    | 287    | 657  | 31022 | 110,4  | 94,1       |
| chr16 | 57694648 | 57694830 | GPR56   | NM_005682    | 15 | 13 | 13    | 109    | 297  | 13010 | 71,09  | 100        |
| chr16 | 57695632 | 57695918 | GPR56   | NM_005682    | 15 | 13 | 14    | 269    | 440  | 19394 | 67,57  | 91,4       |
| chr16 | 57697361 | 57697549 | GPR56   | NM_005682    | 15 | 13 | 15    | 131    | 242  | 10308 | 54,54  | 100        |
| chr16 | 69362811 | 69363177 | COG8    | NM_032382    | 6  | 5  | 6     | 559    | 1260 | 58731 | 160,03 | 48,7       |
| chr16 | 69364789 | 69365054 | COG8    | NM_032382    | 6  | 5  | 5     | 257    | 288  | 13560 | 50,98  | 81,7       |

|       |          |          |         |              |    |    |       |         |       |        |        |            |
|-------|----------|----------|---------|--------------|----|----|-------|---------|-------|--------|--------|------------|
| chr16 | 69366545 | 69366718 | COG8    | NM_032382    | 6  | 5  | 4     | 169     | 365   | 14858  | 85,39  | 60,4       |
| chr16 | 69368342 | 69369200 | COG8    | NM_032382    | 6  | 5  | 3     | 828     | 1809  | 85914  | 100,02 | 93,8       |
| chr16 | 69370453 | 69370638 | COG8    | NM_032382    | 6  | 5  | 2     | 208     | 1130  | 49650  | 266,94 | 78,4       |
| chr16 | 69373094 | 69373555 | COG8    | NM_032382    | 6  | 5  | 1     | 377     | 430   | 18089  | 39,15  | 96         |
| chr16 | 71601938 | 71602227 | TAT     | NM_000353    | 12 | 11 | 12    | 141     | 570   | 26065  | 89,88  | 100        |
| chr16 | 71602628 | 71602810 | TAT     | NM_000353    | 12 | 11 | 11    | 99      | 812   | 37064  | 202,54 | 85,9       |
| chr16 | 71603773 | 71603952 | TAT     | NM_000353    | 12 | 11 | 10    | 84      | 86    | 3835   | 21,31  | 81         |
| chr16 | 71604210 | 71604392 | TAT     | NM_000353    | 12 | 11 | 9     | 129     | 445   | 18107  | 98,95  | 70,5       |
| chr16 | 71604509 | 71604682 | TAT     | NM_000353    | 12 | 11 | 8     | 153     | 162   | 6503   | 37,37  | 66         |
| chr16 | 71605449 | 71605622 | TAT     | NM_000353    | 12 | 11 | 7     | 53      | 241   | 9561   | 54,95  | 100        |
| chr16 | 71606120 | 71606314 | TAT     | NM_000353    | 12 | 11 | 6     | 139     | 175   | 7480   | 38,36  | 77,7       |
| chr16 | 71606396 | 71606623 | TAT     | NM_000353    | 12 | 11 | 5     | 159     | 252   | 10113  | 44,36  | 100        |
| chr16 | 71607312 | 71607503 | TAT     | NM_000353    | 12 | 11 | 4     | 68      | 168   | 7122   | 37,09  | 91,2       |
| chr16 | 71609867 | 71610369 | TAT     | NM_000353    | 12 | 11 | 3,2   | 105.235 | 3814  | 178374 | 354,62 | 60,0,100.0 |
| chr16 | 75573956 | 75574156 | TMEM231 | NM_001077418 | 7  | 7  | 7     | 181     | 84    | 3759   | 18,7   | 64,6       |
| chr16 | 75575218 | 75575442 | TMEM231 | NM_001077418 | 7  | 7  | 6     | 106     | 166   | 7364   | 32,73  | 100        |
| chr16 | 75576520 | 75576640 | TMEM231 | NM_001077418 | 7  | 7  | 5     | 82      | 92    | 3176   | 26,25  | 75,6       |
| chr16 | 75579146 | 75579266 | TMEM231 | NM_001077418 | 7  | 7  | 4     | 144     | 81    | 2831   | 23,4   | 11,8       |
| chr16 | 75579842 | 75579962 | TMEM231 | NM_001077418 | 7  | 7  | 3     | 129     | 508   | 18286  | 151,12 | 8,5        |
| chr16 | 75589750 | 75590258 | TMEM231 | NM_001077418 | 7  | 7  | 2,1   | 170.139 | 414   | 18825  | 36,98  | 71,8,100.0 |
| chr16 | 81118173 | 81118293 | GCSH    | NM_004483    | 5  | 5  | 4     | 132     | 54    | 2151   | 17,78  | 20,5       |
| chr16 | 81121212 | 81121409 | GCSH    | NM_004483    | 5  | 5  | 3     | 64      | 110   | 4777   | 24,13  | 90,6       |
| chr16 | 81124285 | 81124405 | GCSH    | NM_004483    | 5  | 5  | 2     | 80      | 346   | 11990  | 99,09  | 1,2        |
| chr16 | 83932828 | 83933342 | MLYCD   | NM_012213    | 5  | 5  | 1     | 528     | 5     | 168    | 0,33   | 85,2       |
| chr16 | 83940544 | 83940747 | MLYCD   | NM_012213    | 5  | 5  | 2     | 113     | 586   | 26236  | 128,61 | 100        |
| chr16 | 83941639 | 83941833 | MLYCD   | NM_012213    | 5  | 5  | 3     | 157     | 131   | 5648   | 28,96  | 65,6       |
| chr16 | 83945782 | 83945955 | MLYCD   | NM_012213    | 5  | 5  | 4     | 150     | 399   | 15794  | 90,77  | 88,7       |
| chr16 | 83948507 | 83949036 | MLYCD   | NM_012213    | 5  | 5  | 5     | 534     | 668   | 32266  | 60,88  | 89,1       |
| chr16 | 89160253 | 89160459 | ACSF3   | NM_001243279 | 11 | 9  | 1     | 188     | 0     | 0      | 0      | 80,9       |
| chr16 | 89167139 | 89167801 | ACSF3   | NM_001243279 | 11 | 9  | 3     | 666     | 672   | 31678  | 47,78  | 92,6       |
| chr16 | 89168950 | 89169156 | ACSF3   | NM_001243279 | 11 | 9  | 4     | 156     | 381   | 16040  | 77,49  | 92,9       |
| chr16 | 89178545 | 89178724 | ACSF3   | NM_001243279 | 11 | 9  | 5     | 155     | 169   | 7297   | 40,54  | 71         |
| chr16 | 89180645 | 89180848 | ACSF3   | NM_001243279 | 11 | 9  | 6     | 149     | 192   | 8885   | 43,55  | 68,5       |
| chr16 | 89187140 | 89187343 | ACSF3   | NM_001243279 | 11 | 9  | 7     | 113     | 363   | 16328  | 80,04  | 100        |
| chr16 | 89199524 | 89199727 | ACSF3   | NM_001243279 | 11 | 9  | 8     | 127     | 204   | 8330   | 40,83  | 100        |
| chr16 | 89211670 | 89211891 | ACSF3   | NM_001243279 | 11 | 9  | 9     | 135     | 220   | 8790   | 39,59  | 100        |
| chr16 | 89212253 | 89212435 | ACSF3   | NM_001243279 | 11 | 9  | 10    | 112     | 622   | 27207  | 148,67 | 80,4       |
| chr16 | 89220497 | 89220694 | ACSF3   | NM_001243279 | 11 | 9  | 11    | 118     | 165   | 7356   | 37,15  | 100        |
| chr16 | 89238170 | 89238370 | CDH15   | NM_004933    | 14 | 14 | 1     | 42      | 9     | 372    | 1,85   | 100        |
| chr16 | 89245742 | 89245927 | CDH15   | NM_004933    | 14 | 14 | 2     | 159     | 40    | 1530   | 8,23   | 65,4       |
| chr16 | 89246606 | 89246806 | CDH15   | NM_004933    | 14 | 14 | 3     | 156     | 24    | 1002   | 4,99   | 100        |
| chr16 | 89249858 | 89250055 | CDH15   | NM_004933    | 14 | 14 | 4     | 145     | 352   | 15258  | 77,06  | 69         |
| chr16 | 89251607 | 89251970 | CDH15   | NM_004933    | 14 | 14 | 5     | 161     | 59    | 2456   | 6,75   | 83,9       |
| chr16 | 89253845 | 89254024 | CDH15   | NM_004933    | 14 | 14 | 6     | 129     | 931   | 40879  | 227,11 | 93,8       |
| chr16 | 89254500 | 89254697 | CDH15   | NM_004933    | 14 | 14 | 7     | 186     | 130   | 5518   | 27,87  | 100        |
| chr16 | 89256583 | 89256866 | CDH15   | NM_004933    | 14 | 14 | 8     | 254     | 182   | 7796   | 27,45  | 85         |
| chr16 | 89257695 | 89258301 | CDH15   | NM_004933    | 14 | 14 | 9,10  | 143.240 | 404   | 17419  | 28,7   | 100.0,99.6 |
| chr16 | 89258637 | 89258914 | CDH15   | NM_004933    | 14 | 14 | 11    | 240     | 13    | 536    | 1,93   | 90         |
| chr16 | 89259825 | 89260244 | CDH15   | NM_004933    | 14 | 14 | 12,13 | 137.159 | 278   | 13264  | 31,58  | 100.0,51.6 |
| chr16 | 89261261 | 89261633 | CDH15   | NM_004933    | 14 | 14 | 14    | 294     | 102   | 4425   | 11,86  | 100        |
| chr16 | 89335033 | 89335153 | ANKRD11 | NM_013275    | 13 | 11 | 13    | 186     | 5     | 188    | 1,55   | 21         |
| chr16 | 89337245 | 89337424 | ANKRD11 | NM_013275    | 13 | 11 | 12    | 93      | 102   | 4147   | 23,04  | 78,5       |
| chr16 | 89341330 | 89341699 | ANKRD11 | NM_013275    | 13 | 11 | 11,10 | 144,99  | 118   | 5145   | 13,91  | 25.0,100.0 |
| chr16 | 89344946 | 89345534 | ANKRD11 | NM_013275    | 13 | 11 | 9     | 6578    | 235   | 10923  | 18,54  | 0,8        |
| chr16 | 89346084 | 89352115 | ANKRD11 | NM_013275    | 13 | 11 | 9     | 6578    | 13002 | 628345 | 104,17 | 90,8       |
| chr16 | 89352369 | 89352557 | ANKRD11 | NM_013275    | 13 | 11 | 8     | 148     | 466   | 21729  | 114,97 | 75         |
| chr16 | 89354817 | 89355011 | ANKRD11 | NM_013275    | 13 | 11 | 7     | 143     | 473   | 20815  | 106,74 | 53,1       |

|       |          |          |          |              |    |    |         |                |       |        |        |                         |
|-------|----------|----------|----------|--------------|----|----|---------|----------------|-------|--------|--------|-------------------------|
| chr16 | 89357068 | 89357671 | ANKRD11  | NM_013275    | 13 | 11 | 6,5     | 204.171        | 708   | 33062  | 54,74  | 82.8,100.0              |
| chr16 | 89371654 | 89371839 | ANKRD11  | NM_013275    | 13 | 11 | 4       | 139            | 156   | 7118   | 38,27  | 71,2                    |
| chr16 | 89383336 | 89383545 | ANKRD11  | NM_013275    | 13 | 11 | 3       | 87             | 1196  | 53248  | 253,56 | 100                     |
| chr17 | 2541573  | 2541758  | PAFAH1B1 | NM_000430    | 11 | 10 | 2       | 32             | 209   | 8628   | 46,39  | 100                     |
| chr17 | 2568682  | 2568867  | PAFAH1B1 | NM_000430    | 11 | 10 | 3       | 85             | 185   | 7930   | 42,63  | 81,2                    |
| chr17 | 2569171  | 2569371  | PAFAH1B1 | NM_000430    | 11 | 10 | 4       | 75             | 116   | 4821   | 23,99  | 82,7                    |
| chr17 | 2570213  | 2570333  | PAFAH1B1 | NM_000430    | 11 | 10 | 5       | 207            | 26    | 1094   | 9,04   | 23,2                    |
| chr17 | 2573509  | 2573706  | PAFAH1B1 | NM_000430    | 11 | 10 | 6       | 169            | 432   | 19759  | 99,79  | 69,2                    |
| chr17 | 2575860  | 2576069  | PAFAH1B1 | NM_000430    | 11 | 10 | 7       | 103            | 378   | 17009  | 81     | 100                     |
| chr17 | 2577270  | 2577455  | PAFAH1B1 | NM_000430    | 11 | 10 | 8       | 229            | 51    | 1682   | 9,04   | 44,5                    |
| chr17 | 2579824  | 2580000  | PAFAH1B1 | NM_000430    | 11 | 10 | 9       | 102            | 276   | 10916  | 61,67  | 75,5                    |
| chr17 | 2583510  | 2583710  | PAFAH1B1 | NM_000430    | 11 | 10 | 10      | 157            | 590   | 24534  | 122,06 | 66,9                    |
| chr17 | 2584896  | 2585084  | PAFAH1B1 | NM_000430    | 11 | 10 | 11      | 74             | 142   | 6353   | 33,61  | 83,8                    |
| chr17 | 3379317  | 3379689  | ASPA     | NM_001128085 | 7  | 6  | 2       | 236            | 738   | 33681  | 90,3   | 100                     |
| chr17 | 3384909  | 3385079  | ASPA     | NM_001128085 | 7  | 6  | 3       | 196            | 112   | 4416   | 25,82  | 87,2                    |
| chr17 | 3386739  | 3386939  | ASPA     | NM_001128085 | 7  | 6  | 4       | 94             | 538   | 24320  | 121    | 100                     |
| chr17 | 3392464  | 3392637  | ASPA     | NM_001128085 | 7  | 6  | 5       | 108            | 237   | 9876   | 56,76  | 100                     |
| chr17 | 3397577  | 3397768  | ASPA     | NM_001128085 | 7  | 6  | 6       | 110            | 363   | 16695  | 86,95  | 100                     |
| chr17 | 3402196  | 3402461  | ASPA     | NM_001128085 | 7  | 6  | 7       | 198            | 323   | 13952  | 52,45  | 94,4                    |
| chr17 | 7487014  | 7487324  | MPDU1    | NM_004870    | 7  | 7  | 1       | 103            | 280   | 12565  | 40,4   | 100                     |
| chr17 | 7489012  | 7489363  | MPDU1    | NM_004870    | 7  | 7  | 2,3     | 66.133         | 743   | 34277  | 97,38  | 100.0,75.2              |
| chr17 | 7489978  | 7491132  | MPDU1    | NM_004870    | 7  | 7  | 4,5,6,7 | 86.119.111.126 | 4855  | 232348 | 201,17 | 100.0,100.0,100.0,100.0 |
| chr17 | 17696232 | 17701884 | RAI1     | NM_030665    | 6  | 4  | 3       | 5565           | 10911 | 525117 | 92,89  | 100                     |
| chr17 | 17707097 | 17707457 | RAI1     | NM_030665    | 6  | 4  | 4       | 94             | 1195  | 56829  | 157,42 | 71,3                    |
| chr17 | 17712453 | 17712813 | RAI1     | NM_030665    | 6  | 4  | 5       | 50             | 455   | 20695  | 57,33  | 100                     |
| chr17 | 19552194 | 19552468 | ALDH3A2  | NM_001031806 | 11 | 10 | 1       | 153            | 18    | 802    | 2,92   | 100                     |
| chr17 | 19554772 | 19555043 | ALDH3A2  | NM_001031806 | 11 | 10 | 2       | 232            | 2337  | 109252 | 401,66 | 79,3                    |
| chr17 | 19555877 | 19556062 | ALDH3A2  | NM_001031806 | 11 | 10 | 3       | 86             | 389   | 14114  | 75,88  | 80,2                    |
| chr17 | 19559745 | 19559957 | ALDH3A2  | NM_001031806 | 11 | 10 | 4       | 209            | 593   | 26366  | 123,78 | 68,4                    |
| chr17 | 19560992 | 19561183 | ALDH3A2  | NM_001031806 | 11 | 10 | 5       | 118            | 408   | 17028  | 88,69  | 100                     |
| chr17 | 19564470 | 19564670 | ALDH3A2  | NM_001031806 | 11 | 10 | 6       | 142            | 185   | 7551   | 37,57  | 78,9                    |
| chr17 | 19566664 | 19566861 | ALDH3A2  | NM_001031806 | 11 | 10 | 7       | 167            | 266   | 10531  | 53,19  | 89,2                    |
| chr17 | 19568255 | 19568428 | ALDH3A2  | NM_001031806 | 11 | 10 | 8       | 100            | 137   | 5775   | 33,19  | 100                     |
| chr17 | 19574963 | 19575228 | ALDH3A2  | NM_001031806 | 11 | 10 | 9       | 236            | 550   | 23798  | 89,47  | 82,6                    |
| chr17 | 19576361 | 19576558 | ALDH3A2  | NM_001031806 | 11 | 10 | 10      | 84             | 479   | 22397  | 113,12 | 100                     |
| chr17 | 19578814 | 19579008 | ALDH3A2  | NM_001031806 | 11 | 10 | 11      | 2034           | 613   | 26062  | 133,65 | 6,8                     |
| chr17 | 29482945 | 29483133 | NF1      | NM_001042492 | 58 | 58 | 2       | 144            | 199   | 8178   | 43,27  | 92,4                    |
| chr17 | 29486026 | 29486229 | NF1      | NM_001042492 | 58 | 58 | 3       | 84             | 248   | 11055  | 54,19  | 100                     |
| chr17 | 29490270 | 29490446 | NF1      | NM_001042492 | 58 | 58 | 4       | 191            | 139   | 5877   | 33,2   | 65,4                    |
| chr17 | 29496828 | 29497028 | NF1      | NM_001042492 | 58 | 58 | 5       | 107            | 350   | 15012  | 74,69  | 100                     |
| chr17 | 29508367 | 29508579 | NF1      | NM_001042492 | 58 | 58 | 6       | 68             | 83    | 3172   | 14,89  | 100                     |
| chr17 | 29508695 | 29508886 | NF1      | NM_001042492 | 58 | 58 | 7       | 76             | 130   | 4885   | 25,44  | 100                     |
| chr17 | 29509510 | 29509698 | NF1      | NM_001042492 | 58 | 58 | 8       | 158            | 253   | 11003  | 58,22  | 100                     |
| chr17 | 29527431 | 29527551 | NF1      | NM_001042492 | 58 | 58 | 9       | 174            | 265   | 9716   | 80,3   | 64,4                    |
| chr17 | 29528090 | 29528272 | NF1      | NM_001042492 | 58 | 58 | 10      | 123            | 109   | 4835   | 26,42  | 71,5                    |
| chr17 | 29528469 | 29528589 | NF1      | NM_001042492 | 58 | 58 | 11      | 75             | 10    | 272    | 2,25   | 46,7                    |
| chr17 | 29533229 | 29533438 | NF1      | NM_001042492 | 58 | 58 | 12      | 132            | 782   | 33380  | 158,95 | 100                     |
| chr17 | 29545979 | 29546200 | NF1      | NM_001042492 | 58 | 58 | 14      | 114            | 522   | 22532  | 101,5  | 100                     |
| chr17 | 29550578 | 29550698 | NF1      | NM_001042492 | 58 | 58 | 16      | 124            | 142   | 4380   | 36,2   | 6,5                     |
| chr17 | 29552114 | 29552305 | NF1      | NM_001042492 | 58 | 58 | 17      | 156            | 512   | 22934  | 119,45 | 99,4                    |
| chr17 | 29557393 | 29557513 | NF1      | NM_001042492 | 58 | 58 | 23      | 123            | 33    | 1471   | 12,16  | 6,5                     |
| chr17 | 29559123 | 29559323 | NF1      | NM_001042492 | 58 | 58 | 25      | 117            | 119   | 5197   | 25,86  | 72,6                    |
| chr17 | 29559756 | 29560169 | NF1      | NM_001042492 | 58 | 58 | 26,27   | 182.212        | 1516  | 69727  | 168,42 | 79.1,70.8               |
| chr17 | 29562538 | 29562818 | NF1      | NM_001042492 | 58 | 58 | 28      | 162            | 959   | 41678  | 148,32 | 100                     |
| chr17 | 29562858 | 29562978 | NF1      | NM_001042492 | 58 | 58 | 29      | 104            | 232   | 7759   | 64,12  | 41,3                    |
| chr17 | 29575969 | 29576175 | NF1      | NM_001042492 | 58 | 58 | 30      | 136            | 127   | 5739   | 27,72  | 100                     |
| chr17 | 29579838 | 29580023 | NF1      | NM_001042492 | 58 | 58 | 31      | 63             | 90    | 3800   | 20,43  | 100                     |

|       |          |          |        |              |    |    |       |         |      |       |        |             |
|-------|----------|----------|--------|--------------|----|----|-------|---------|------|-------|--------|-------------|
| chr17 | 29585274 | 29585465 | NF1    | NM_001042492 | 58 | 58 | 32    | 159     | 260  | 11506 | 59,93  | 65,4        |
| chr17 | 29587398 | 29587574 | NF1    | NM_001042492 | 58 | 58 | 34    | 147     | 659  | 27654 | 156,24 | 92,5        |
| chr17 | 29588731 | 29588928 | NF1    | NM_001042492 | 58 | 58 | 35    | 147     | 1079 | 48174 | 243,3  | 98,6        |
| chr17 | 29592326 | 29592446 | NF1    | NM_001042492 | 58 | 58 | 36    | 111     | 111  | 4207  | 34,77  | 28,8        |
| chr17 | 29652893 | 29653348 | NF1    | NM_001042492 | 58 | 58 | 37    | 433     | 1062 | 49390 | 108,31 | 87,3        |
| chr17 | 29654527 | 29654890 | NF1    | NM_001042492 | 58 | 58 | 38    | 341     | 1458 | 70302 | 193,14 | 97,1        |
| chr17 | 29657314 | 29657514 | NF1    | NM_001042492 | 58 | 58 | 39    | 203     | 359  | 14734 | 73,3   | 99          |
| chr17 | 29661921 | 29662121 | NF1    | NM_001042492 | 58 | 58 | 40    | 194     | 344  | 15402 | 76,63  | 66,5        |
| chr17 | 29663329 | 29663941 | NF1    | NM_001042492 | 58 | 58 | 41,42 | 141.280 | 1489 | 70085 | 114,33 | 100,0,100,0 |
| chr17 | 29664362 | 29664556 | NF1    | NM_001042492 | 58 | 58 | 43    | 215     | 230  | 9088  | 46,61  | 79,5        |
| chr17 | 29664786 | 29665146 | NF1    | NM_001042492 | 58 | 58 | 44,45 | 62.115  | 673  | 29168 | 80,8   | 100,0,90,4  |
| chr17 | 29665645 | 29665833 | NF1    | NM_001042492 | 58 | 58 | 46    | 102     | 275  | 11895 | 62,94  | 100         |
| chr17 | 29667537 | 29667716 | NF1    | NM_001042492 | 58 | 58 | 47    | 141     | 357  | 14429 | 80,16  | 90,1        |
| chr17 | 29669956 | 29670165 | NF1    | NM_001042492 | 58 | 58 | 48    | 127     | 394  | 17257 | 82,18  | 100         |
| chr17 | 29676058 | 29676261 | NF1    | NM_001042492 | 58 | 58 | 49    | 132     | 344  | 15295 | 74,98  | 93,9        |
| chr17 | 29677226 | 29677509 | NF1    | NM_001042492 | 58 | 58 | 50    | 136     | 216  | 10051 | 35,39  | 81,6        |
| chr17 | 29679238 | 29679468 | NF1    | NM_001042492 | 58 | 58 | 51    | 158     | 268  | 11943 | 51,7   | 100         |
| chr17 | 29683471 | 29683665 | NF1    | NM_001042492 | 58 | 58 | 52    | 123     | 80   | 3445  | 17,67  | 100         |
| chr17 | 29684013 | 29684462 | NF1    | NM_001042492 | 58 | 58 | 53,54 | 131.101 | 1155 | 54553 | 121,23 | 73,3,100,0  |
| chr17 | 29685498 | 29685686 | NF1    | NM_001042492 | 58 | 58 | 55    | 143     | 476  | 21164 | 111,98 | 100         |
| chr17 | 29685906 | 29686100 | NF1    | NM_001042492 | 58 | 58 | 56    | 47      | 149  | 6557  | 33,63  | 100         |
| chr17 | 29687490 | 29687773 | NF1    | NM_001042492 | 58 | 58 | 57    | 217     | 2003 | 90175 | 317,52 | 100         |
| chr17 | 29700926 | 29701292 | NF1    | NM_001042492 | 58 | 58 | 58    | 143     | 677  | 31630 | 86,19  | 100         |
| chr17 | 40688321 | 40688767 | NAGLU  | NM_000263    | 6  | 6  | 1     | 383     | 5    | 206   | 0,46   | 92,2        |
| chr17 | 40689344 | 40689520 | NAGLU  | NM_000263    | 6  | 6  | 2     | 148     | 374  | 16027 | 90,55  | 70,9        |
| chr17 | 40690299 | 40690745 | NAGLU  | NM_000263    | 6  | 6  | 3,4   | 147,86  | 840  | 37382 | 83,63  | 100,0,67,4  |
| chr17 | 40692910 | 40693190 | NAGLU  | NM_000263    | 6  | 6  | 5     | 257     | 1995 | 88840 | 316,16 | 86,8        |
| chr17 | 40695081 | 40696330 | NAGLU  | NM_000263    | 6  | 6  | 6     | 1211    | 847  | 40246 | 32,2   | 97,1        |
| chr17 | 42928604 | 42928774 | EFTUD2 | NM_004247    | 28 | 27 | 28    | 96      | 771  | 32257 | 188,64 | 100         |
| chr17 | 42929091 | 42929276 | EFTUD2 | NM_004247    | 28 | 27 | 27    | 108     | 226  | 10343 | 55,61  | 88          |
| chr17 | 42929768 | 42929986 | EFTUD2 | NM_004247    | 28 | 27 | 26    | 154     | 184  | 8402  | 38,37  | 100         |
| chr17 | 42930659 | 42931010 | EFTUD2 | NM_004247    | 28 | 27 | 25,24 | 95.119  | 536  | 23385 | 66,43  | 100,0,100,0 |
| chr17 | 42931631 | 42932038 | EFTUD2 | NM_004247    | 28 | 27 | 23,22 | 88.127  | 1846 | 83662 | 205,05 | 100,0,90,6  |
| chr17 | 42932288 | 42932473 | EFTUD2 | NM_004247    | 28 | 27 | 21    | 87      | 184  | 8336  | 44,82  | 97,7        |
| chr17 | 42934446 | 42934649 | EFTUD2 | NM_004247    | 28 | 27 | 20    | 83      | 463  | 19520 | 95,69  | 96,4        |
| chr17 | 42936443 | 42936670 | EFTUD2 | NM_004247    | 28 | 27 | 19    | 102     | 754  | 33837 | 148,41 | 100         |
| chr17 | 42937317 | 42937502 | EFTUD2 | NM_004247    | 28 | 27 | 18    | 141     | 245  | 10890 | 58,55  | 68,8        |
| chr17 | 42937755 | 42937952 | EFTUD2 | NM_004247    | 28 | 27 | 17    | 112     | 451  | 20027 | 101,15 | 100         |
| chr17 | 42940146 | 42940334 | EFTUD2 | NM_004247    | 28 | 27 | 16    | 194     | 516  | 23634 | 125,05 | 66,5        |
| chr17 | 42941061 | 42941243 | EFTUD2 | NM_004247    | 28 | 27 | 15    | 128     | 378  | 15894 | 86,85  | 70,3        |
| chr17 | 42942202 | 42942390 | EFTUD2 | NM_004247    | 28 | 27 | 14    | 136     | 622  | 27059 | 143,17 | 68,4        |
| chr17 | 42945164 | 42945355 | EFTUD2 | NM_004247    | 28 | 27 | 13    | 91      | 27   | 1187  | 6,18   | 100         |
| chr17 | 42945553 | 42945756 | EFTUD2 | NM_004247    | 28 | 27 | 12    | 64      | 326  | 14432 | 70,75  | 100         |
| chr17 | 42949826 | 42950026 | EFTUD2 | NM_004247    | 28 | 27 | 11    | 125     | 390  | 16339 | 81,29  | 90,4        |
| chr17 | 42953212 | 42953415 | EFTUD2 | NM_004247    | 28 | 27 | 10    | 167     | 823  | 37847 | 185,52 | 68,3        |
| chr17 | 42956939 | 42957112 | EFTUD2 | NM_004247    | 28 | 27 | 9     | 83      | 474  | 20425 | 117,39 | 81,9        |
| chr17 | 42957791 | 42958000 | EFTUD2 | NM_004247    | 28 | 27 | 8     | 91      | 132  | 5930  | 28,24  | 86,8        |
| chr17 | 42958993 | 42959211 | EFTUD2 | NM_004247    | 28 | 27 | 7     | 36      | 789  | 33664 | 153,72 | 100         |
| chr17 | 42960399 | 42960578 | EFTUD2 | NM_004247    | 28 | 27 | 6     | 66      | 483  | 21370 | 118,72 | 100         |
| chr17 | 42961023 | 42961208 | EFTUD2 | NM_004247    | 28 | 27 | 5     | 76      | 143  | 6265  | 33,68  | 92,1        |
| chr17 | 42962523 | 42962741 | EFTUD2 | NM_004247    | 28 | 27 | 4     | 79      | 659  | 29474 | 134,58 | 100         |
| chr17 | 42963866 | 42964066 | EFTUD2 | NM_004247    | 28 | 27 | 3     | 166     | 448  | 19965 | 99,33  | 68,7        |
| chr17 | 42971775 | 42971969 | EFTUD2 | NM_004247    | 28 | 27 | 2     | 105     | 742  | 32640 | 167,38 | 100         |
| chr17 | 42987803 | 42988003 | GFAP   | NM_001242376 | 7  | 7  | 7     | 190     | 224  | 9607  | 47,8   | 87,9        |
| chr17 | 42988642 | 42988904 | GFAP   | NM_001242376 | 7  | 7  | 6     | 221     | 128  | 5751  | 21,87  | 82,8        |
| chr17 | 42989065 | 42989268 | GFAP   | NM_001242376 | 7  | 7  | 5     | 126     | 159  | 6314  | 30,95  | 80,2        |
| chr17 | 42990572 | 42990766 | GFAP   | NM_001242376 | 7  | 7  | 4     | 162     | 302  | 11852 | 60,78  | 80,2        |

|       |          |          |         |              |    |    |          |             |       |        |        |                   |
|-------|----------|----------|---------|--------------|----|----|----------|-------------|-------|--------|--------|-------------------|
| chr17 | 42990974 | 42991168 | GFAP    | NM_001242376 | 7  | 7  | 3        | 96          | 1305  | 56432  | 289,39 | 76                |
| chr17 | 42991391 | 42991588 | GFAP    | NM_001242376 | 7  | 7  | 2        | 61          | 248   | 10101  | 51,02  | 100               |
| chr17 | 42992321 | 42992862 | GFAP    | NM_001242376 | 7  | 7  | 1        | 461         | 672   | 30441  | 56,16  | 100               |
| chr17 | 44108743 | 44109020 | KANSL1  | NM_001193465 | 16 | 14 | 16       | 228         | 351   | 15272  | 54,94  | 78,5              |
| chr17 | 44109455 | 44109753 | KANSL1  | NM_001193465 | 16 | 14 | 15       | 253         | 185   | 7938   | 26,55  | 83,4              |
| chr17 | 44110473 | 44110858 | KANSL1  | NM_001193465 | 16 | 14 | 14,13    | 113,58      | 1489  | 66357  | 171,91 | 76.1,100.0        |
| chr17 | 44111557 | 44111736 | KANSL1  | NM_001193465 | 16 | 14 | 12       | 122         | 239   | 10043  | 55,79  | 75,4              |
| chr17 | 44115952 | 44116152 | KANSL1  | NM_001193465 | 16 | 14 | 11       | 149         | 276   | 12257  | 60,98  | 67,8              |
| chr17 | 44116311 | 44116511 | KANSL1  | NM_001193465 | 16 | 14 | 10       | 189         | 114   | 4682   | 23,29  | 63                |
| chr17 | 44117073 | 44117273 | KANSL1  | NM_001193465 | 16 | 14 | 9        | 183         | 564   | 24668  | 122,73 | 97,3              |
| chr17 | 44127824 | 44128009 | KANSL1  | NM_001193465 | 16 | 14 | 8        | 172         | 365   | 16270  | 87,47  | 64,5              |
| chr17 | 44143948 | 44144157 | KANSL1  | NM_001193465 | 16 | 14 | 7        | 196         | 220   | 9380   | 44,67  | 77                |
| chr17 | 44144876 | 44145082 | KANSL1  | NM_001193465 | 16 | 14 | 6        | 119         | 289   | 12535  | 60,56  | 100               |
| chr17 | 44159760 | 44159969 | KANSL1  | NM_001193465 | 16 | 14 | 5        | 102         | 585   | 23354  | 111,21 | 100               |
| chr17 | 44171971 | 44172153 | KANSL1  | NM_001193465 | 16 | 14 | 4        | 142         | 836   | 36533  | 199,63 | 68,3              |
| chr17 | 44248159 | 44249479 | KANSL1  | NM_001193465 | 16 | 14 | 3        | 1289        | 4842  | 236129 | 178,75 | 97,7              |
| chr17 | 71189140 | 71189470 | COG1    | NM_018714    | 14 | 14 | 1        | 315         | 49    | 2248   | 6,79   | 83,2              |
| chr17 | 71192618 | 71193562 | COG1    | NM_018714    | 14 | 14 | 2,3,4    | 245.182.171 | 2960  | 141419 | 149,65 | 100.0,100.0,100.0 |
| chr17 | 71195936 | 71196166 | COG1    | NM_018714    | 14 | 14 | 5        | 157         | 668   | 28027  | 121,33 | 100               |
| chr17 | 71196637 | 71196837 | COG1    | NM_018714    | 14 | 14 | 6        | 211         | 328   | 14489  | 72,08  | 63                |
| chr17 | 71197289 | 71198138 | COG1    | NM_018714    | 14 | 14 | 7        | 792         | 3911  | 188156 | 221,36 | 94,8              |
| chr17 | 71199045 | 71199236 | COG1    | NM_018714    | 14 | 14 | 8        | 147         | 474   | 20945  | 109,09 | 66,7              |
| chr17 | 71199745 | 71199963 | COG1    | NM_018714    | 14 | 14 | 9        | 162         | 182   | 7834   | 35,77  | 100               |
| chr17 | 71201586 | 71201792 | COG1    | NM_018714    | 14 | 14 | 10       | 128         | 229   | 9864   | 47,65  | 78,9              |
| chr17 | 71202198 | 71202374 | COG1    | NM_018714    | 14 | 14 | 11       | 109         | 123   | 4844   | 27,37  | 75,2              |
| chr17 | 71202738 | 71202932 | COG1    | NM_018714    | 14 | 14 | 12       | 110         | 1232  | 52279  | 268,1  | 78,2              |
| chr17 | 71203282 | 71203568 | COG1    | NM_018714    | 14 | 14 | 13       | 76          | 449   | 20863  | 72,69  | 100               |
| chr17 | 71204322 | 71204673 | COG1    | NM_018714    | 14 | 14 | 14       | 138         | 2238  | 104968 | 298,2  | 100               |
| chr17 | 73942728 | 73942925 | ACOX1   | NM_004035    | 14 | 14 | 14       | 48          | 210   | 9428   | 47,62  | 100               |
| chr17 | 73944364 | 73944570 | ACOX1   | NM_004035    | 14 | 14 | 13       | 207         | 96    | 4383   | 21,17  | 84,5              |
| chr17 | 73945228 | 73945926 | ACOX1   | NM_004035    | 14 | 14 | 12,11,10 | 144.106.180 | 1785  | 85959  | 122,97 | 100.0,100.0,71.1  |
| chr17 | 73946804 | 73946989 | ACOX1   | NM_004035    | 14 | 14 | 9        | 191         | 169   | 7247   | 38,96  | 70,7              |
| chr17 | 73947521 | 73947694 | ACOX1   | NM_004035    | 14 | 14 | 8        | 163         | 491   | 21669  | 124,53 | 84,7              |
| chr17 | 73949537 | 73949740 | ACOX1   | NM_004035    | 14 | 14 | 7        | 170         | 163   | 6846   | 33,56  | 97,1              |
| chr17 | 73951623 | 73952054 | ACOX1   | NM_004035    | 14 | 14 | 6,5      | 116.120     | 852   | 40815  | 94,48  | 100.0,100.0       |
| chr17 | 73953484 | 73953696 | ACOX1   | NM_004035    | 14 | 14 | 4        | 108         | 328   | 14081  | 66,11  | 100               |
| chr17 | 73956350 | 73956550 | ACOX1   | NM_004035    | 14 | 14 | 3        | 161         | 139   | 6324   | 31,46  | 66,5              |
| chr17 | 73974519 | 73974734 | ACOX1   | NM_004035    | 14 | 14 | 2        | 160         | 342   | 15195  | 70,35  | 75                |
| chr17 | 73974996 | 73975214 | ACOX1   | NM_004035    | 14 | 14 | 1        | 109         | 51    | 2069   | 9,45   | 100               |
| chr17 | 79477820 | 79477940 | ACTG1   | NM_001199954 | 6  | 5  | 6        | 144         | 30    | 916    | 7,57   | 27,8              |
| chr17 | 79478128 | 79478248 | ACTG1   | NM_001199954 | 6  | 5  | 5,4      | 182.439     | 188   | 6777   | 56,01  | 3.8,8.0           |
| chr17 | 79478635 | 79478755 | ACTG1   | NM_001199954 | 6  | 5  | 4        | 439         | 275   | 8605   | 71,12  | 4,1               |
| chr17 | 79479142 | 79479443 | ACTG1   | NM_001199954 | 6  | 5  | 3,2      | 240.123     | 453   | 20770  | 68,77  | 11.2,100.0        |
| chr17 | 79891139 | 79891315 | PYCR1   | NM_006907    | 7  | 7  | 7        | 163         | 93    | 4041   | 22,83  | 69,9              |
| chr17 | 79892041 | 79892967 | PYCR1   | NM_006907    | 7  | 7  | 6,5,4    | 164,93,222  | 408   | 19052  | 20,55  | 100.0,100.0,74.8  |
| chr17 | 79893247 | 79893417 | PYCR1   | NM_006907    | 7  | 7  | 3        | 180         | 181   | 7464   | 43,65  | 81,1              |
| chr17 | 79893912 | 79894094 | PYCR1   | NM_006907    | 7  | 7  | 2        | 71          | 496   | 22702  | 124,05 | 100               |
| chr17 | 79894558 | 79894740 | PYCR1   | NM_006907    | 7  | 7  | 1        | 67          | 19    | 774    | 4,23   | 100               |
| chr18 | 3451873  | 3452417  | TGIF1   | NM_170695    | 3  | 3  | 1        | 403         | 407   | 17817  | 32,69  | 100               |
| chr18 | 3456396  | 3456821  | TGIF1   | NM_170695    | 3  | 3  | 2        | 227         | 657   | 28490  | 66,88  | 80,6              |
| chr18 | 3457389  | 3458069  | TGIF1   | NM_170695    | 3  | 3  | 3        | 576         | 3644  | 176830 | 259,66 | 95,5              |
| chr18 | 42281224 | 42281854 | SETBP1  | NM_015559    | 6  | 5  | 2        | 486         | 1256  | 57532  | 91,18  | 100               |
| chr18 | 42449076 | 42449291 | SETBP1  | NM_015559    | 6  | 5  | 3        | 54          | 653   | 27710  | 128,29 | 100               |
| chr18 | 42529766 | 42533264 | SETBP1  | NM_015559    | 6  | 5  | 4        | 3460        | 13226 | 634757 | 181,41 | 98,8              |
| chr18 | 42618362 | 42618559 | SETBP1  | NM_015559    | 6  | 5  | 5        | 171         | 414   | 18146  | 91,65  | 64,3              |
| chr18 | 42643084 | 42643743 | SETBP1  | NM_015559    | 6  | 5  | 6        | 620         | 1099  | 51764  | 78,43  | 93,5              |
| chr18 | 44682368 | 44682553 | IER3IP1 | NM_016097    | 3  | 3  | 3        | 56          | 502   | 21903  | 117,76 | 10,7              |

|       |          |          |         |              |    |    |     |         |      |       |        |            |
|-------|----------|----------|---------|--------------|----|----|-----|---------|------|-------|--------|------------|
| chr18 | 44683823 | 44684005 | IER3IP1 | NM_016097    | 3  | 3  | 2   | 102     | 583  | 26680 | 145,79 | 84,3       |
| chr18 | 44702619 | 44702819 | IER3IP1 | NM_016097    | 3  | 3  | 1   | 91      | 228  | 10345 | 51,47  | 33         |
| chr18 | 46570346 | 46570620 | DYM     | NM_017653    | 17 | 16 | 17  | 150     | 407  | 18133 | 65,94  | 100        |
| chr18 | 46623803 | 46624000 | DYM     | NM_017653    | 17 | 16 | 16  | 114     | 222  | 8828  | 44,59  | 72,8       |
| chr18 | 46645103 | 46645359 | DYM     | NM_017653    | 17 | 16 | 15  | 183     | 675  | 29514 | 114,84 | 100        |
| chr18 | 46689981 | 46690160 | DYM     | NM_017653    | 17 | 16 | 14  | 103     | 38   | 1542  | 8,57   | 100        |
| chr18 | 46783323 | 46783526 | DYM     | NM_017653    | 17 | 16 | 13  | 95      | 553  | 24376 | 119,49 | 100        |
| chr18 | 46784691 | 46784873 | DYM     | NM_017653    | 17 | 16 | 12  | 114     | 297  | 12959 | 70,81  | 100        |
| chr18 | 46798477 | 46798680 | DYM     | NM_017653    | 17 | 16 | 11  | 126     | 423  | 18493 | 90,65  | 100        |
| chr18 | 46808373 | 46808585 | DYM     | NM_017653    | 17 | 16 | 10  | 179     | 513  | 23008 | 108,02 | 96,6       |
| chr18 | 46812740 | 46812919 | DYM     | NM_017653    | 17 | 16 | 9   | 183     | 291  | 12214 | 67,86  | 63,4       |
| chr18 | 46858180 | 46858386 | DYM     | NM_017653    | 17 | 16 | 8   | 143     | 175  | 7285  | 35,19  | 100        |
| chr18 | 46859988 | 46860200 | DYM     | NM_017653    | 17 | 16 | 7   | 126     | 81   | 3340  | 15,68  | 81,7       |
| chr18 | 46889442 | 46889627 | DYM     | NM_017653    | 17 | 16 | 6   | 73      | 300  | 13261 | 71,3   | 100        |
| chr18 | 46904906 | 46905094 | DYM     | NM_017653    | 17 | 16 | 5   | 134     | 447  | 19601 | 103,71 | 100        |
| chr18 | 46905948 | 46906145 | DYM     | NM_017653    | 17 | 16 | 4   | 94      | 288  | 12560 | 63,43  | 100        |
| chr18 | 46917903 | 46918073 | DYM     | NM_017653    | 17 | 16 | 3   | 53      | 366  | 15912 | 93,05  | 100        |
| chr18 | 46956616 | 46956813 | DYM     | NM_017653    | 17 | 16 | 2   | 140     | 260  | 10020 | 50,61  | 100        |
| chr18 | 48573372 | 48573711 | SMAD4   | NM_005359    | 12 | 11 | 2   | 249     | 443  | 20159 | 59,29  | 100        |
| chr18 | 48575015 | 48575212 | SMAD4   | NM_005359    | 12 | 11 | 3   | 175     | 309  | 13213 | 66,73  | 89,7       |
| chr18 | 48575645 | 48575848 | SMAD4   | NM_005359    | 12 | 11 | 4   | 30      | 139  | 6130  | 30,05  | 100        |
| chr18 | 48581129 | 48581329 | SMAD4   | NM_005359    | 12 | 11 | 5   | 213     | 1546 | 65860 | 327,66 | 84         |
| chr18 | 48584534 | 48584900 | SMAD4   | NM_005359    | 12 | 11 | 6,7 | 120,117 | 1052 | 50392 | 137,31 | 67,5,100.0 |
| chr18 | 48586169 | 48586354 | SMAD4   | NM_005359    | 12 | 11 | 8   | 51      | 324  | 13301 | 71,51  | 100        |
| chr18 | 48591808 | 48592023 | SMAD4   | NM_005359    | 12 | 11 | 9   | 184     | 632  | 27057 | 125,26 | 91,8       |
| chr18 | 48593360 | 48593581 | SMAD4   | NM_005359    | 12 | 11 | 10  | 169     | 283  | 12299 | 55,4   | 100        |
| chr18 | 48602961 | 48603191 | SMAD4   | NM_005359    | 12 | 11 | 11  | 139     | 100  | 4418  | 19,13  | 100        |
| chr18 | 48604644 | 48604933 | SMAD4   | NM_005359    | 12 | 11 | 12  | 212     | 958  | 46296 | 159,64 | 91,5       |
| chr18 | 52895362 | 52895547 | TCF4    | NM_001243226 | 21 | 20 | 20  | 137     | 579  | 23891 | 128,45 | 67,2       |
| chr18 | 52896121 | 52896404 | TCF4    | NM_001243226 | 21 | 20 | 19  | 230     | 1248 | 58072 | 204,48 | 81,3       |
| chr18 | 52899663 | 52899848 | TCF4    | NM_001243226 | 21 | 20 | 18  | 163     | 823  | 33865 | 182,07 | 66,9       |
| chr18 | 52901674 | 52901871 | TCF4    | NM_001243226 | 21 | 20 | 17  | 136     | 245  | 10662 | 53,85  | 68,4       |
| chr18 | 52921795 | 52921980 | TCF4    | NM_001243226 | 21 | 20 | 16  | 204     | 1175 | 50325 | 270,56 | 67,2       |
| chr18 | 52924450 | 52924647 | TCF4    | NM_001243226 | 21 | 20 | 15  | 77      | 422  | 17395 | 87,85  | 100        |
| chr18 | 52927073 | 52927243 | TCF4    | NM_001243226 | 21 | 20 | 14  | 79      | 132  | 5772  | 33,75  | 81         |
| chr18 | 52928615 | 52928845 | TCF4    | NM_001243226 | 21 | 20 | 13  | 68      | 209  | 8923  | 38,63  | 100        |
| chr18 | 52936961 | 52937146 | TCF4    | NM_001243226 | 21 | 20 | 12  | 133     | 762  | 32930 | 177,04 | 63,9       |
| chr18 | 52942891 | 52943085 | TCF4    | NM_001243226 | 21 | 20 | 11  | 134     | 1256 | 56959 | 292,1  | 69,4       |
| chr18 | 52946805 | 52947008 | TCF4    | NM_001243226 | 21 | 20 | 10  | 106     | 233  | 10215 | 50,07  | 78,3       |
| chr18 | 53017484 | 53017681 | TCF4    | NM_001243226 | 21 | 20 | 9   | 50      | 365  | 15780 | 79,7   | 100        |
| chr18 | 53018057 | 53018284 | TCF4    | NM_001243226 | 21 | 20 | 8   | 130     | 160  | 6851  | 30,05  | 100        |
| chr18 | 53070724 | 53071007 | TCF4    | NM_001243226 | 21 | 20 | 7   | 65      | 882  | 40286 | 141,85 | 40         |
| chr18 | 53128209 | 53128385 | TCF4    | NM_001243226 | 21 | 20 | 6   | 97      | 113  | 4689  | 26,49  | 100        |
| chr18 | 53131222 | 53131437 | TCF4    | NM_001243226 | 21 | 20 | 5   | 62      | 309  | 13733 | 63,58  | 100        |
| chr18 | 53252461 | 53252646 | TCF4    | NM_001243226 | 21 | 20 | 4   | 73      | 562  | 24309 | 130,69 | 100        |
| chr18 | 53254265 | 53254447 | TCF4    | NM_001243226 | 21 | 20 | 3   | 92      | 73   | 3403  | 18,6   | 100        |
| chr18 | 53298548 | 53298724 | TCF4    | NM_001243226 | 21 | 20 | 2   | 91      | 139  | 5966  | 33,71  | 79,1       |
| chr18 | 53302873 | 53303126 | TCF4    | NM_001243226 | 21 | 20 | 1   | 195     | 676  | 31469 | 123,89 | 99         |
| chr18 | 57103071 | 57103360 | CCBE1   | NM_133459    | 11 | 11 | 11  | 234     | 477  | 21814 | 75,22  | 94,4       |
| chr18 | 57105326 | 57105532 | CCBE1   | NM_133459    | 11 | 11 | 10  | 36      | 756  | 33331 | 161,02 | 100        |
| chr18 | 57106696 | 57106976 | CCBE1   | NM_133459    | 11 | 11 | 9,8 | 36,140  | 526  | 24061 | 85,63  | 100,0,48.6 |
| chr18 | 57115243 | 57115449 | CCBE1   | NM_133459    | 11 | 11 | 7   | 121     | 244  | 10752 | 51,94  | 76,9       |
| chr18 | 57122072 | 57122251 | CCBE1   | NM_133459    | 11 | 11 | 6   | 101     | 445  | 18725 | 104,03 | 100        |
| chr18 | 57133961 | 57134182 | CCBE1   | NM_133459    | 11 | 11 | 5   | 153     | 630  | 26405 | 118,94 | 100        |
| chr18 | 57136656 | 57136874 | CCBE1   | NM_133459    | 11 | 11 | 4   | 135     | 911  | 40637 | 185,56 | 100        |
| chr18 | 57147280 | 57147480 | CCBE1   | NM_133459    | 11 | 11 | 3   | 53      | 118  | 4987  | 24,81  | 100        |
| chr18 | 57363845 | 57364015 | CCBE1   | NM_133459    | 11 | 11 | 2   | 81      | 161  | 6988  | 40,87  | 100        |



|       |          |          |        |           |    |    |       |         |      |       |        |            |
|-------|----------|----------|--------|-----------|----|----|-------|---------|------|-------|--------|------------|
| chr18 | 57364387 | 57364581 | CCBE1  | NM_133459 | 11 | 11 | 1     | 131     | 11   | 474   | 2,43   | 100        |
| chr18 | 59713115 | 59713312 | PIGN   | NM_176787 | 31 | 28 | 31    | 124     | 107  | 4307  | 21,75  | 79         |
| chr18 | 59739858 | 59740046 | PIGN   | NM_176787 | 31 | 28 | 30    | 53      | 141  | 5752  | 30,43  | 100        |
| chr18 | 59741935 | 59742135 | PIGN   | NM_176787 | 31 | 28 | 29    | 43      | 121  | 4891  | 24,33  | 100        |
| chr18 | 59749850 | 59750032 | PIGN   | NM_176787 | 31 | 28 | 28    | 74      | 47   | 1885  | 10,3   | 100        |
| chr18 | 59751715 | 59751885 | PIGN   | NM_176787 | 31 | 28 | 27    | 76      | 124  | 5268  | 30,81  | 100        |
| chr18 | 59752413 | 59752598 | PIGN   | NM_176787 | 31 | 28 | 26    | 56      | 110  | 4346  | 23,37  | 100        |
| chr18 | 59755874 | 59756071 | PIGN   | NM_176787 | 31 | 28 | 25    | 87      | 368  | 16515 | 83,41  | 95,4       |
| chr18 | 59757704 | 59757889 | PIGN   | NM_176787 | 31 | 28 | 24    | 103     | 102  | 4365  | 23,47  | 100        |
| chr18 | 59763019 | 59763234 | PIGN   | NM_176787 | 31 | 28 | 23    | 103     | 161  | 7441  | 34,45  | 100        |
| chr18 | 59768252 | 59768446 | PIGN   | NM_176787 | 31 | 28 | 22    | 109     | 350  | 14436 | 74,03  | 100        |
| chr18 | 59770013 | 59770198 | PIGN   | NM_176787 | 31 | 28 | 21    | 109     | 366  | 15227 | 81,87  | 100        |
| chr18 | 59772735 | 59772917 | PIGN   | NM_176787 | 31 | 28 | 20    | 92      | 176  | 7905  | 43,2   | 100        |
| chr18 | 59774050 | 59774324 | PIGN   | NM_176787 | 31 | 28 | 19,18 | 93.100  | 466  | 21046 | 76,53  | 69,9,100.0 |
| chr18 | 59777014 | 59777205 | PIGN   | NM_176787 | 31 | 28 | 17    | 140     | 305  | 13256 | 69,04  | 99,3       |
| chr18 | 59780354 | 59780557 | PIGN   | NM_176787 | 31 | 28 | 16    | 183     | 199  | 8762  | 42,95  | 100        |
| chr18 | 59781699 | 59781896 | PIGN   | NM_176787 | 31 | 28 | 15    | 79      | 154  | 6392  | 32,28  | 100        |
| chr18 | 59805330 | 59805542 | PIGN   | NM_176787 | 31 | 28 | 14    | 56      | 188  | 8245  | 38,71  | 100        |
| chr18 | 59806176 | 59806358 | PIGN   | NM_176787 | 31 | 28 | 13    | 93      | 563  | 24986 | 136,54 | 100        |
| chr18 | 59807596 | 59807766 | PIGN   | NM_176787 | 31 | 28 | 12    | 60      | 197  | 8076  | 47,23  | 100        |
| chr18 | 59810467 | 59810658 | PIGN   | NM_176787 | 31 | 28 | 11    | 41      | 53   | 2007  | 10,45  | 100        |
| chr18 | 59813102 | 59813299 | PIGN   | NM_176787 | 31 | 28 | 10    | 117     | 76   | 3263  | 16,48  | 100        |
| chr18 | 59814105 | 59814311 | PIGN   | NM_176787 | 31 | 28 | 9     | 131     | 672  | 27475 | 132,73 | 82,4       |
| chr18 | 59815366 | 59815566 | PIGN   | NM_176787 | 31 | 28 | 8     | 125     | 210  | 8706  | 43,31  | 96         |
| chr18 | 59821706 | 59821888 | PIGN   | NM_176787 | 31 | 28 | 7     | 107     | 240  | 10598 | 57,91  | 100        |
| chr18 | 59824295 | 59824477 | PIGN   | NM_176787 | 31 | 28 | 6     | 99      | 515  | 23333 | 127,5  | 100        |
| chr18 | 59824876 | 59825082 | PIGN   | NM_176787 | 31 | 28 | 5     | 122     | 654  | 27897 | 134,77 | 100        |
| chr18 | 59828341 | 59828600 | PIGN   | NM_176787 | 31 | 28 | 4     | 221     | 633  | 29086 | 111,87 | 100        |
| chr18 | 77439865 | 77440231 | CTDP1  | NM_004715 | 13 | 13 | 1     | 314     | 0    | 0     | 0      | 90,4       |
| chr18 | 77455091 | 77455291 | CTDP1  | NM_004715 | 13 | 13 | 2     | 84      | 368  | 14644 | 72,86  | 79,8       |
| chr18 | 77455872 | 77456057 | CTDP1  | NM_004715 | 13 | 13 | 3     | 94      | 573  | 24275 | 130,51 | 86,2       |
| chr18 | 77457778 | 77457948 | CTDP1  | NM_004715 | 13 | 13 | 4     | 129     | 306  | 12811 | 74,92  | 69         |
| chr18 | 77464801 | 77465016 | CTDP1  | NM_004715 | 13 | 13 | 5     | 151     | 202  | 8560  | 39,63  | 77,5       |
| chr18 | 77470257 | 77470451 | CTDP1  | NM_004715 | 13 | 13 | 6     | 91      | 148  | 6635  | 34,03  | 100        |
| chr18 | 77473005 | 77473226 | CTDP1  | NM_004715 | 13 | 13 | 7     | 167     | 241  | 9839  | 44,32  | 80,2       |
| chr18 | 77474412 | 77475480 | CTDP1  | NM_004715 | 13 | 13 | 8     | 1038    | 650  | 30555 | 28,58  | 95,4       |
| chr18 | 77477572 | 77478101 | CTDP1  | NM_004715 | 13 | 13 | 9,10  | 142.207 | 511  | 23399 | 44,15  | 73,9,100.0 |
| chr18 | 77488851 | 77489051 | CTDP1  | NM_004715 | 13 | 13 | 11    | 163     | 390  | 16739 | 83,28  | 89         |
| chr18 | 77496286 | 77496462 | CTDP1  | NM_004715 | 13 | 13 | 12    | 167     | 36   | 1603  | 9,06   | 64,7       |
| chr18 | 77513670 | 77513891 | CTDP1  | NM_004715 | 13 | 13 | 13    | 139     | 45   | 1889  | 8,51   | 87,1       |
| chr19 | 1383732  | 1383938  | NDUFS7 | NM_024407 | 8  | 8  | 1     | 16      | 17   | 767   | 3,71   | 81,2       |
| chr19 | 1387652  | 1387879  | NDUFS7 | NM_024407 | 8  | 8  | 2     | 37      | 59   | 2596  | 11,39  | 100        |
| chr19 | 1388546  | 1389629  | NDUFS7 | NM_024407 | 8  | 8  | 3,4   | 69.106  | 1090 | 50941 | 46,99  | 68.1,100.0 |
| chr19 | 1390852  | 1391132  | NDUFS7 | NM_024407 | 8  | 8  | 5,6   | 180,47  | 185  | 8190  | 29,15  | 100.0,31.9 |
| chr19 | 1393204  | 1393377  | NDUFS7 | NM_024407 | 8  | 8  | 7     | 89      | 1037 | 45719 | 262,75 | 100        |
| chr19 | 1395368  | 1395562  | NDUFS7 | NM_024407 | 8  | 8  | 8     | 98      | 17   | 750   | 3,85   | 100        |
| chr19 | 1398702  | 1399225  | GAMT   | NM_138924 | 5  | 5  | 5,4   | 351,68  | 1249 | 57819 | 110,34 | 92.3,100.0 |
| chr19 | 1399493  | 1399690  | GAMT   | NM_138924 | 5  | 5  | 3     | 64      | 70   | 3264  | 16,48  | 100        |
| chr19 | 1399773  | 1399952  | GAMT   | NM_138924 | 5  | 5  | 2     | 146     | 71   | 3028  | 16,82  | 100        |
| chr19 | 1401269  | 1401442  | GAMT   | NM_138924 | 5  | 5  | 1     | 181     | 14   | 422   | 2,43   | 81,8       |
| chr19 | 4090528  | 4090781  | MAP2K2 | NM_030662 | 11 | 11 | 11    | 111     | 78   | 3205  | 12,62  | 100        |
| chr19 | 4094376  | 4094561  | MAP2K2 | NM_030662 | 11 | 11 | 10    | 116     | 60   | 2559  | 13,76  | 100        |
| chr19 | 4095391  | 4095576  | MAP2K2 | NM_030662 | 11 | 11 | 9     | 62      | 152  | 6214  | 33,41  | 91,9       |
| chr19 | 4097217  | 4097393  | MAP2K2 | NM_030662 | 11 | 11 | 8     | 65      | 155  | 6606  | 37,32  | 100        |
| chr19 | 4099280  | 4099480  | MAP2K2 | NM_030662 | 11 | 11 | 7     | 214     | 259  | 11354 | 56,49  | 62,1       |
| chr19 | 4101082  | 4101362  | MAP2K2 | NM_030662 | 11 | 11 | 6,5   | 125,52  | 117  | 4794  | 17,06  | 48.0,100.0 |
| chr19 | 4102387  | 4102569  | MAP2K2 | NM_030662 | 11 | 11 | 4     | 78      | 61   | 2633  | 14,39  | 83,3       |

|       |          |          |         |              |    |    |        |             |      |        |        |                  |
|-------|----------|----------|---------|--------------|----|----|--------|-------------|------|--------|--------|------------------|
| chr19 | 4110554  | 4110754  | MAP2K2  | NM_030662    | 11 | 11 | 3      | 147         | 302  | 12816  | 63,76  | 68               |
| chr19 | 4117496  | 4117696  | MAP2K2  | NM_030662    | 11 | 11 | 2      | 211         | 1137 | 46177  | 229,74 | 62,6             |
| chr19 | 4123820  | 4124017  | MAP2K2  | NM_030662    | 11 | 11 | 1      | 92          | 6    | 208    | 1,05   | 57,6             |
| chr19 | 5892247  | 5893244  | NDUFA11 | NM_001193375 | 4  | 4  | 4      | 374         | 866  | 40564  | 40,65  | 84,8             |
| chr19 | 5896349  | 5896573  | NDUFA11 | NM_001193375 | 4  | 4  | 3      | 123         | 17   | 731    | 3,25   | 89,4             |
| chr19 | 5896846  | 5897031  | NDUFA11 | NM_001193375 | 4  | 4  | 2      | 93          | 731  | 31159  | 167,52 | 100              |
| chr19 | 5903615  | 5903803  | NDUFA11 | NM_001193375 | 4  | 4  | 1      | 97          | 91   | 3731   | 19,74  | 100              |
| chr19 | 7587611  | 7587817  | MCOLN1  | NM_020533    | 14 | 14 | 1      | 31          | 19   | 868    | 4,19   | 100              |
| chr19 | 7589844  | 7590124  | MCOLN1  | NM_020533    | 14 | 14 | 2      | 206         | 251  | 12008  | 42,73  | 100              |
| chr19 | 7591296  | 7591828  | MCOLN1  | NM_020533    | 14 | 14 | 3,4    | 168.166     | 1256 | 55788  | 104,67 | 100.0,100.0      |
| chr19 | 7592399  | 7592842  | MCOLN1  | NM_020533    | 14 | 14 | 5,6    | 109,97      | 467  | 20670  | 46,55  | 100.0,95.9       |
| chr19 | 7592966  | 7593148  | MCOLN1  | NM_020533    | 14 | 14 | 7      | 100         | 199  | 8473   | 46,3   | 100              |
| chr19 | 7593557  | 7594157  | MCOLN1  | NM_020533    | 14 | 14 | 8,9,10 | 107.150.102 | 1203 | 55041  | 91,58  | 30.8,100.0,100.0 |
| chr19 | 7594508  | 7594702  | MCOLN1  | NM_020533    | 14 | 14 | 11     | 123         | 1191 | 52011  | 266,72 | 74               |
| chr19 | 7595124  | 7595407  | MCOLN1  | NM_020533    | 14 | 14 | 12     | 216         | 848  | 40302  | 141,91 | 100              |
| chr19 | 7598476  | 7598756  | MCOLN1  | NM_020533    | 14 | 14 | 13,14  | 131,37      | 356  | 16221  | 57,73  | 48.9,100.0       |
| chr19 | 11094756 | 11095063 | SMARCA4 | NM_001128849 | 36 | 35 | 2      | 222         | 361  | 14834  | 48,16  | 100              |
| chr19 | 11095989 | 11096189 | SMARCA4 | NM_001128849 | 36 | 35 | 3      | 133         | 268  | 11129  | 55,37  | 69,9             |
| chr19 | 11096792 | 11097220 | SMARCA4 | NM_001128849 | 36 | 35 | 4      | 405         | 503  | 22912  | 53,41  | 87,9             |
| chr19 | 11097469 | 11097654 | SMARCA4 | NM_001128849 | 36 | 35 | 5      | 99          | 175  | 6938   | 37,3   | 74,7             |
| chr19 | 11098270 | 11098553 | SMARCA4 | NM_001128849 | 36 | 35 | 6      | 259         | 101  | 4266   | 15,02  | 81,9             |
| chr19 | 11100015 | 11100215 | SMARCA4 | NM_001128849 | 36 | 35 | 7      | 127         | 242  | 10008  | 49,79  | 82,7             |
| chr19 | 11101737 | 11101964 | SMARCA4 | NM_001128849 | 36 | 35 | 8      | 174         | 105  | 4200   | 18,42  | 79,9             |
| chr19 | 11105415 | 11105615 | SMARCA4 | NM_001128849 | 36 | 35 | 9      | 174         | 206  | 8155   | 40,57  | 64,4             |
| chr19 | 11106943 | 11107309 | SMARCA4 | NM_001128849 | 36 | 35 | 10,11  | 168,51      | 332  | 14955  | 40,75  | 67.9,100.0       |
| chr19 | 11113741 | 11114098 | SMARCA4 | NM_001128849 | 36 | 35 | 12,13  | 131,58      | 500  | 22780  | 63,63  | 72.5,100.0       |
| chr19 | 11118541 | 11118744 | SMARCA4 | NM_001128849 | 36 | 35 | 14     | 122         | 136  | 5871   | 28,78  | 100              |
| chr19 | 11120971 | 11121186 | SMARCA4 | NM_001128849 | 36 | 35 | 15     | 151         | 4227 | 185060 | 856,76 | 86,1             |
| chr19 | 11123657 | 11123869 | SMARCA4 | NM_001128849 | 36 | 35 | 16     | 164         | 582  | 23840  | 111,92 | 80,5             |
| chr19 | 11129547 | 11129723 | SMARCA4 | NM_001128849 | 36 | 35 | 17     | 67          | 617  | 25992  | 146,85 | 100              |
| chr19 | 11130248 | 11130436 | SMARCA4 | NM_001128849 | 36 | 35 | 18     | 111         | 486  | 19655  | 103,99 | 100              |
| chr19 | 11132087 | 11132625 | SMARCA4 | NM_001128849 | 36 | 35 | 19     | 243         | 398  | 18781  | 34,84  | 92,6             |
| chr19 | 11134126 | 11134320 | SMARCA4 | NM_001128849 | 36 | 35 | 20     | 114         | 335  | 13233  | 67,86  | 100              |
| chr19 | 11134900 | 11135103 | SMARCA4 | NM_001128849 | 36 | 35 | 21     | 108         | 276  | 11301  | 55,4   | 89,8             |
| chr19 | 11136085 | 11136315 | SMARCA4 | NM_001128849 | 36 | 35 | 22     | 87          | 723  | 30744  | 133,09 | 100              |
| chr19 | 11136973 | 11137167 | SMARCA4 | NM_001128849 | 36 | 35 | 23     | 47          | 425  | 17632  | 90,42  | 100              |
| chr19 | 11138478 | 11138672 | SMARCA4 | NM_001128849 | 36 | 35 | 24     | 167         | 1469 | 65318  | 334,96 | 89,2             |
| chr19 | 11141439 | 11141734 | SMARCA4 | NM_001128849 | 36 | 35 | 25     | 164         | 82   | 3612   | 12,2   | 79,9             |
| chr19 | 11144011 | 11144294 | SMARCA4 | NM_001128849 | 36 | 35 | 26     | 228         | 230  | 10037  | 35,34  | 80,3             |
| chr19 | 11144466 | 11144651 | SMARCA4 | NM_001128849 | 36 | 35 | 27     | 99          | 118  | 5374   | 28,89  | 76,8             |
| chr19 | 11144776 | 11144979 | SMARCA4 | NM_001128849 | 36 | 35 | 28     | 78          | 305  | 13813  | 67,71  | 100              |
| chr19 | 11145618 | 11145913 | SMARCA4 | NM_001128849 | 36 | 35 | 29     | 219         | 27   | 1278   | 4,32   | 87,2             |
| chr19 | 11150008 | 11150217 | SMARCA4 | NM_001128849 | 36 | 35 | 30     | 96          | 89   | 3933   | 18,73  | 87,5             |
| chr19 | 11151932 | 11152227 | SMARCA4 | NM_001128849 | 36 | 35 | 31     | 254         | 175  | 6667   | 22,52  | 96,5             |
| chr19 | 11168941 | 11169144 | SMARCA4 | NM_001128849 | 36 | 35 | 32     | 109         | 289  | 12361  | 60,59  | 90,8             |
| chr19 | 11169435 | 11169659 | SMARCA4 | NM_001128849 | 36 | 35 | 33     | 102         | 214  | 10019  | 44,53  | 100              |
| chr19 | 11170377 | 11170790 | SMARCA4 | NM_001128849 | 36 | 35 | 34,35  | 133.143     | 241  | 11444  | 27,64  | 100.0,49.0       |
| chr19 | 11172435 | 11172647 | SMARCA4 | NM_001128849 | 36 | 35 | 36     | 33          | 329  | 14070  | 66,06  | 100              |
| chr19 | 12757344 | 12757541 | MAN2B1  | NM_000528    | 24 | 24 | 24     | 113         | 700  | 30505  | 154,07 | 95,6             |
| chr19 | 12757998 | 12758346 | MAN2B1  | NM_000528    | 24 | 24 | 23,22  | 103.156     | 857  | 40314  | 115,51 | 100.0,57.7       |
| chr19 | 12759010 | 12759317 | MAN2B1  | NM_000528    | 24 | 24 | 21     | 228         | 131  | 6190   | 20,1   | 90,8             |
| chr19 | 12760000 | 12760271 | MAN2B1  | NM_000528    | 24 | 24 | 20,19  | 81,88       | 408  | 18955  | 69,69  | 38.3,100.0       |
| chr19 | 12760749 | 12761121 | MAN2B1  | NM_000528    | 24 | 24 | 18,17  | 102.119     | 1187 | 54154  | 145,18 | 78.4,100.0       |
| chr19 | 12762967 | 12763321 | MAN2B1  | NM_000528    | 24 | 24 | 16,15  | 118,98      | 1571 | 75172  | 211,75 | 100.0,100.0      |
| chr19 | 12766575 | 12766769 | MAN2B1  | NM_000528    | 24 | 24 | 14     | 186         | 109  | 4791   | 24,57  | 64               |
| chr19 | 12767267 | 12767482 | MAN2B1  | NM_000528    | 24 | 24 | 13     | 117         | 258  | 10806  | 50,03  | 83,8             |
| chr19 | 12767695 | 12767978 | MAN2B1  | NM_000528    | 24 | 24 | 12     | 108         | 1052 | 44631  | 157,15 | 100              |

|       |          |          |          |              |    |    |                |                 |      |        |        |                             |
|-------|----------|----------|----------|--------------|----|----|----------------|-----------------|------|--------|--------|-----------------------------|
| chr19 | 12768283 | 12768483 | MAN2B1   | NM_000528    | 24 | 24 | 11             | 110             | 76   | 3131   | 15,58  | 79,1                        |
| chr19 | 12768937 | 12769365 | MAN2B1   | NM_000528    | 24 | 24 | 10,9,8         | 79,121,83       | 555  | 26479  | 61,72  | 24.1,100.0,100.0            |
| chr19 | 12771965 | 12772186 | MAN2B1   | NM_000528    | 24 | 24 | 7              | 117             | 621  | 27631  | 124,46 | 96,6                        |
| chr19 | 12774028 | 12774246 | MAN2B1   | NM_000528    | 24 | 24 | 6              | 146             | 212  | 8741   | 39,91  | 79,5                        |
| chr19 | 12774557 | 12774727 | MAN2B1   | NM_000528    | 24 | 24 | 5              | 133             | 363  | 14878  | 87,01  | 69,9                        |
| chr19 | 12775611 | 12775796 | MAN2B1   | NM_000528    | 24 | 24 | 4              | 194             | 317  | 13720  | 73,76  | 95,9                        |
| chr19 | 12776187 | 12776621 | MAN2B1   | NM_000528    | 24 | 24 | 3,2            | 174,103         | 704  | 31864  | 73,25  | 87.9,100.0                  |
| chr19 | 12777295 | 12777495 | MAN2B1   | NM_000528    | 24 | 24 | 1              | 159             | 13   | 563    | 2,8    | 87,4                        |
| chr19 | 12917420 | 12917605 | RNASEH2A | NM_006397    | 8  | 8  | 1              | 127             | 112  | 5104   | 27,44  | 92,9                        |
| chr19 | 12917882 | 12918375 | RNASEH2A | NM_006397    | 8  | 8  | 2,3,4          | 72,124,88       | 797  | 38534  | 78     | 16.7,100.0,100.0            |
| chr19 | 12920931 | 12921306 | RNASEH2A | NM_006397    | 8  | 8  | 5,6            | 138,88          | 400  | 19359  | 51,49  | 66.7,100.0                  |
| chr19 | 12923823 | 12924278 | RNASEH2A | NM_006397    | 8  | 8  | 7,8            | 124,139         | 1069 | 49796  | 109,2  | 100.0,98.6                  |
| chr19 | 14017154 | 14017351 | CC2D1A   | NM_017721    | 29 | 29 | 1              | 60              | 20   | 852    | 4,3    | 100                         |
| chr19 | 14020515 | 14020810 | CC2D1A   | NM_017721    | 29 | 29 | 2              | 136             | 837  | 38132  | 128,82 | 100                         |
| chr19 | 14023145 | 14023428 | CC2D1A   | NM_017721    | 29 | 29 | 3,4            | 116,66          | 260  | 10915  | 38,43  | 92.2,100.0                  |
| chr19 | 14024018 | 14024550 | CC2D1A   | NM_017721    | 29 | 29 | 5,6            | 135.235         | 666  | 32000  | 60,04  | 72.6,100.0                  |
| chr19 | 14028769 | 14028975 | CC2D1A   | NM_017721    | 29 | 29 | 7              | 125             | 171  | 7069   | 34,15  | 74,4                        |
| chr19 | 14029276 | 14030039 | CC2D1A   | NM_017721    | 29 | 29 | 8,9,10,11      | 73,72,131,73    | 762  | 34153  | 44,7   | 100.0,100.0,100.0,100.0     |
| chr19 | 14030530 | 14030751 | CC2D1A   | NM_017721    | 29 | 29 | 12             | 134             | 123  | 5431   | 24,46  | 90,3                        |
| chr19 | 14031333 | 14031699 | CC2D1A   | NM_017721    | 29 | 29 | 13,14          | 112.173         | 267  | 11601  | 31,61  | 100.0,79.2                  |
| chr19 | 14034172 | 14034719 | CC2D1A   | NM_017721    | 29 | 29 | 15,16,17       | 123,59,117      | 1235 | 59275  | 108,17 | 78.9,100.0,100.0            |
| chr19 | 14037398 | 14038146 | CC2D1A   | NM_017721    | 29 | 29 | 18,19,20,21,22 | 74,59,52,100,91 | 2738 | 130342 | 174,02 | 8.1,100.0,100.0,100.0,100.0 |
| chr19 | 14038598 | 14038985 | CC2D1A   | NM_017721    | 29 | 29 | 23,24          | 138,65          | 576  | 27515  | 70,91  | 100.0,75.4                  |
| chr19 | 14040120 | 14040418 | CC2D1A   | NM_017721    | 29 | 29 | 25,26          | 64.127          | 87   | 3871   | 12,95  | 100.0,56.7                  |
| chr19 | 14040809 | 14041163 | CC2D1A   | NM_017721    | 29 | 29 | 27,28          | 77,48           | 250  | 11605  | 32,69  | 100.0,100.0                 |
| chr19 | 14640405 | 14640605 | TECR     | NM_138501    | 13 | 13 | 1              | 15              | 137  | 5616   | 27,94  | 100                         |
| chr19 | 14673336 | 14673536 | TECR     | NM_138501    | 13 | 13 | 2              | 51              | 147  | 6012   | 29,91  | 100                         |
| chr19 | 14673946 | 14674155 | TECR     | NM_138501    | 13 | 13 | 3              | 52              | 532  | 24731  | 117,77 | 100                         |
| chr19 | 14674444 | 14675121 | TECR     | NM_138501    | 13 | 13 | 4,5,6,7        | 45.104.116.106  | 1043 | 49791  | 73,44  | 100.0,100.0,100.0,100.0     |
| chr19 | 14675637 | 14676018 | TECR     | NM_138501    | 13 | 13 | 8,9,10,11      | 73,44,58,89     | 968  | 40097  | 104,97 | 46.6,100.0,100.0,5.6        |
| chr19 | 14676064 | 14676184 | TECR     | NM_138501    | 13 | 13 | 11             | 89              | 28   | 589    | 4,87   | 43,8                        |
| chr19 | 14676359 | 14676621 | TECR     | NM_138501    | 13 | 13 | 12,13          | 46.128          | 33   | 1479   | 5,62   | 100.0,51.6                  |
| chr19 | 18266614 | 18266977 | PIK3R2   | NM_005027    | 16 | 15 | 2              | 322             | 32   | 1557   | 4,28   | 89,4                        |
| chr19 | 18271295 | 18271480 | PIK3R2   | NM_005027    | 16 | 15 | 3              | 93              | 314  | 13757  | 73,96  | 84,9                        |
| chr19 | 18271665 | 18272256 | PIK3R2   | NM_005027    | 16 | 15 | 4,5,6          | 51.132.217      | 230  | 10386  | 17,54  | 100.0,100.0,77.4            |
| chr19 | 18272805 | 18273393 | PIK3R2   | NM_005027    | 16 | 15 | 7,8,9          | 86,109,99       | 397  | 18699  | 31,75  | 66.3,100.0,100.0            |
| chr19 | 18273788 | 18274237 | PIK3R2   | NM_005027    | 16 | 15 | 10,11          | 181.126         | 1024 | 46607  | 103,57 | 93.9,100.0                  |
| chr19 | 18276932 | 18277111 | PIK3R2   | NM_005027    | 16 | 15 | 12             | 143             | 355  | 14922  | 82,9   | 99,3                        |
| chr19 | 18277999 | 18278196 | PIK3R2   | NM_005027    | 16 | 15 | 13             | 177             | 442  | 18584  | 93,86  | 66,7                        |
| chr19 | 18279227 | 18279664 | PIK3R2   | NM_005027    | 16 | 15 | 14,15          | 72.171          | 215  | 9934   | 22,68  | 100.0,75.4                  |
| chr19 | 18279833 | 18280193 | PIK3R2   | NM_005027    | 16 | 15 | 16             | 208             | 259  | 11464  | 31,76  | 100                         |
| chr19 | 33878230 | 33878418 | PEPD     | NM_000285    | 15 | 15 | 15             | 138             | 348  | 15089  | 79,84  | 100                         |
| chr19 | 33878809 | 33879255 | PEPD     | NM_000285    | 15 | 15 | 14             | 192             | 1047 | 48815  | 109,21 | 93,2                        |
| chr19 | 33882150 | 33882347 | PEPD     | NM_000285    | 15 | 15 | 13             | 185             | 106  | 4558   | 23,02  | 79,5                        |
| chr19 | 33892633 | 33892818 | PEPD     | NM_000285    | 15 | 15 | 12             | 149             | 143  | 6662   | 35,82  | 96                          |
| chr19 | 33902489 | 33902689 | PEPD     | NM_000285    | 15 | 15 | 11             | 78              | 418  | 17076  | 84,96  | 100                         |
| chr19 | 33904381 | 33904596 | PEPD     | NM_000285    | 15 | 15 | 10             | 69              | 19   | 817    | 3,78   | 100                         |
| chr19 | 33953898 | 33954089 | PEPD     | NM_000285    | 15 | 15 | 9              | 47              | 327  | 14753  | 76,84  | 100                         |
| chr19 | 33954842 | 33955027 | PEPD     | NM_000285    | 15 | 15 | 8              | 76              | 444  | 18394  | 98,89  | 100                         |
| chr19 | 33968945 | 33969127 | PEPD     | NM_000285    | 15 | 15 | 7              | 45              | 405  | 14651  | 80,06  | 100                         |
| chr19 | 33980760 | 33980984 | PEPD     | NM_000285    | 15 | 15 | 6              | 62              | 99   | 4212   | 18,72  | 100                         |
| chr19 | 33984194 | 33984364 | PEPD     | NM_000285    | 15 | 15 | 5              | 48              | 260  | 10112  | 59,13  | 100                         |
| chr19 | 33991850 | 33992023 | PEPD     | NM_000285    | 15 | 15 | 4              | 64              | 372  | 15668  | 90,05  | 90,6                        |
| chr19 | 34001972 | 34002157 | PEPD     | NM_000285    | 15 | 15 | 3              | 128             | 226  | 8991   | 48,34  | 70,3                        |
| chr19 | 34003427 | 34003627 | PEPD     | NM_000285    | 15 | 15 | 2              | 184             | 204  | 9280   | 46,17  | 70,1                        |
| chr19 | 34012611 | 34012808 | PEPD     | NM_000285    | 15 | 15 | 1              | 17              | 5    | 168    | 0,85   | 100                         |
| chr19 | 36545882 | 36546106 | WDR62    | NM_001083961 | 32 | 32 | 1              | 177             | 54   | 2143   | 9,52   | 95,5                        |

|       |          |          |        |              |    |    |             |                |      |        |        |                        |
|-------|----------|----------|--------|--------------|----|----|-------------|----------------|------|--------|--------|------------------------|
| chr19 | 36549749 | 36550035 | WDR62  | NM_001083961 | 32 | 32 | 2           | 92             | 960  | 43049  | 150    | 27,2                   |
| chr19 | 36550744 | 36550926 | WDR62  | NM_001083961 | 32 | 32 | 3           | 63             | 331  | 13439  | 73,44  | 90,5                   |
| chr19 | 36556758 | 36556946 | WDR62  | NM_001083961 | 32 | 32 | 4           | 58             | 834  | 35024  | 185,31 | 100                    |
| chr19 | 36557155 | 36557337 | WDR62  | NM_001083961 | 32 | 32 | 5           | 171            | 383  | 16608  | 90,75  | 100                    |
| chr19 | 36558143 | 36558355 | WDR62  | NM_001083961 | 32 | 32 | 6           | 138            | 1276 | 55717  | 261,58 | 100                    |
| chr19 | 36558783 | 36558989 | WDR62  | NM_001083961 | 32 | 32 | 7           | 183            | 557  | 23258  | 112,36 | 71                     |
| chr19 | 36562413 | 36562598 | WDR62  | NM_001083961 | 32 | 32 | 8           | 161            | 609  | 25309  | 136,07 | 87,6                   |
| chr19 | 36564236 | 36564620 | WDR62  | NM_001083961 | 32 | 32 | 9           | 190            | 1048 | 44447  | 115,45 | 100                    |
| chr19 | 36572243 | 36572446 | WDR62  | NM_001083961 | 32 | 32 | 10          | 138            | 78   | 3167   | 15,52  | 81,2                   |
| chr19 | 36573881 | 36574093 | WDR62  | NM_001083961 | 32 | 32 | 11          | 179            | 340  | 14594  | 68,52  | 72,1                   |
| chr19 | 36575425 | 36575640 | WDR62  | NM_001083961 | 32 | 32 | 12          | 92             | 163  | 6464   | 29,93  | 93,5                   |
| chr19 | 36577611 | 36577820 | WDR62  | NM_001083961 | 32 | 32 | 13          | 126            | 348  | 14207  | 67,65  | 82,5                   |
| chr19 | 36579948 | 36580243 | WDR62  | NM_001083961 | 32 | 32 | 14,15       | 68.122         | 754  | 34611  | 116,93 | 88.2,100.0             |
| chr19 | 36581269 | 36581454 | WDR62  | NM_001083961 | 32 | 32 | 16          | 76             | 278  | 11809  | 63,49  | 100                    |
| chr19 | 36582145 | 36582422 | WDR62  | NM_001083961 | 32 | 32 | 17,18       | 112,64         | 1280 | 58772  | 211,41 | 61.6,100.0             |
| chr19 | 36583542 | 36583742 | WDR62  | NM_001083961 | 32 | 32 | 19          | 123            | 148  | 6227   | 30,98  | 100                    |
| chr19 | 36584938 | 36585141 | WDR62  | NM_001083961 | 32 | 32 | 20          | 134            | 586  | 24654  | 120,85 | 96,3                   |
| chr19 | 36587809 | 36587985 | WDR62  | NM_001083961 | 32 | 32 | 21          | 53             | 1131 | 47486  | 268,28 | 100                    |
| chr19 | 36590197 | 36590501 | WDR62  | NM_001083961 | 32 | 32 | 22          | 219            | 438  | 18595  | 60,97  | 91,8                   |
| chr19 | 36591688 | 36591861 | WDR62  | NM_001083961 | 32 | 32 | 23          | 128            | 364  | 14547  | 83,6   | 70,3                   |
| chr19 | 36592118 | 36592339 | WDR62  | NM_001083961 | 32 | 32 | 24          | 104            | 246  | 10688  | 48,14  | 98,1                   |
| chr19 | 36592448 | 36592672 | WDR62  | NM_001083961 | 32 | 32 | 25          | 111            | 121  | 5119   | 22,75  | 96,4                   |
| chr19 | 36592839 | 36593042 | WDR62  | NM_001083961 | 32 | 32 | 26          | 138            | 174  | 7380   | 36,18  | 92                     |
| chr19 | 36593596 | 36594815 | WDR62  | NM_001083961 | 32 | 32 | 27,28,29,30 | 115,127,52,639 | 2980 | 144051 | 118,07 | 100.0,100.0,100.0,89.4 |
| chr19 | 36595342 | 36595883 | WDR62  | NM_001083961 | 32 | 32 | 31,32       | 158.261        | 539  | 23089  | 42,6   | 100.0,82.0             |
| chr19 | 41903761 | 41903955 | BCKDHA | NM_000709    | 9  | 9  | 1           | 108            | 76   | 2927   | 15,01  | 74,1                   |
| chr19 | 41916550 | 41916907 | BCKDHA | NM_000709    | 9  | 9  | 2,3         | 180,87         | 569  | 25246  | 70,52  | 95.6,92.0              |
| chr19 | 41919961 | 41920182 | BCKDHA | NM_000709    | 9  | 9  | 4           | 109            | 165  | 6766   | 30,48  | 93,6                   |
| chr19 | 41924984 | 41925190 | BCKDHA | NM_000709    | 9  | 9  | 5           | 162            | 738  | 33084  | 159,83 | 93,2                   |
| chr19 | 41928116 | 41928289 | BCKDHA | NM_000709    | 9  | 9  | 6           | 207            | 280  | 10899  | 62,64  | 77,3                   |
| chr19 | 41928482 | 41929073 | BCKDHA | NM_000709    | 9  | 9  | 7,8         | 142.172        | 2374 | 112677 | 190,33 | 100.0,99.4             |
| chr19 | 41930330 | 41930515 | BCKDHA | NM_000709    | 9  | 9  | 9           | 171            | 295  | 12684  | 68,19  | 100                    |
| chr19 | 44010960 | 44011163 | ETHE1  | NM_014297    | 7  | 7  | 7           | 53             | 128  | 5883   | 28,84  | 100                    |
| chr19 | 44012058 | 44012249 | ETHE1  | NM_014297    | 7  | 7  | 6           | 117            | 104  | 4095   | 21,33  | 100                    |
| chr19 | 44012796 | 44013002 | ETHE1  | NM_014297    | 7  | 7  | 5           | 90             | 569  | 24064  | 116,25 | 84,4                   |
| chr19 | 44015484 | 44015678 | ETHE1  | NM_014297    | 7  | 7  | 4           | 130            | 542  | 24992  | 128,16 | 69,2                   |
| chr19 | 44030282 | 44030811 | ETHE1  | NM_014297    | 7  | 7  | 3,2         | 149.145        | 646  | 27705  | 52,27  | 100.0,100.0            |
| chr19 | 44031113 | 44031328 | ETHE1  | NM_014297    | 7  | 7  | 1           | 81             | 655  | 27109  | 125,5  | 98,8                   |
| chr19 | 45854751 | 45854945 | ERCC2  | NM_000400    | 23 | 23 | 23          | 93             | 261  | 10851  | 55,65  | 63,4                   |
| chr19 | 45855530 | 45856115 | ERCC2  | NM_000400    | 23 | 23 | 22,21,20    | 144,144,71     | 703  | 33587  | 57,32  | 56.2,100.0,100.0       |
| chr19 | 45856398 | 45856666 | ERCC2  | NM_000400    | 23 | 23 | 19,18       | 73,93          | 364  | 15475  | 57,53  | 21.9,100.0             |
| chr19 | 45857984 | 45858190 | ERCC2  | NM_000400    | 23 | 23 | 17          | 122            | 600  | 25938  | 125,3  | 100                    |
| chr19 | 45858833 | 45859012 | ERCC2  | NM_000400    | 23 | 23 | 16          | 64             | 1257 | 56548  | 314,16 | 100                    |
| chr19 | 45860585 | 45861025 | ERCC2  | NM_000400    | 23 | 23 | 15,14,13    | 102,70,70      | 588  | 27433  | 62,21  | 44.1,100.0,100.0       |
| chr19 | 45864782 | 45865154 | ERCC2  | NM_000400    | 23 | 23 | 12          | 119            | 787  | 36146  | 96,91  | 100                    |
| chr19 | 45867015 | 45867843 | ERCC2  | NM_000400    | 23 | 23 | 11,10,9,8   | 169,134,97,124 | 178  | 8150   | 9,83   | 91.7,100.0,100.0,100.0 |
| chr19 | 45868093 | 45868474 | ERCC2  | NM_000400    | 23 | 23 | 7,6         | 117.117        | 357  | 16123  | 42,21  | 100.0,100.0            |
| chr19 | 45871811 | 45872014 | ERCC2  | NM_000400    | 23 | 23 | 5           | 114            | 753  | 32792  | 160,75 | 100                    |
| chr19 | 45872129 | 45872412 | ERCC2  | NM_000400    | 23 | 23 | 4,3         | 63,78          | 1944 | 90731  | 319,48 | 100.0,100.0            |
| chr19 | 45873420 | 45873958 | ERCC2  | NM_000400    | 23 | 23 | 2,1         | 100,5          | 103  | 4003   | 7,43   | 71.0,100.0             |
| chr19 | 46273761 | 46273955 | DMPK   | NM_001081563 | 14 | 14 | 14          | 153            | 93   | 4136   | 21,21  | 90,2                   |
| chr19 | 46274221 | 46274439 | DMPK   | NM_001081563 | 14 | 14 | 13          | 90             | 30   | 1255   | 5,73   | 100                    |
| chr19 | 46274557 | 46275154 | DMPK   | NM_001081563 | 14 | 14 | 12,11,10    | 47,98,158      | 530  | 24886  | 41,62  | 100.0,100.0,79.7       |
| chr19 | 46275791 | 46275979 | DMPK   | NM_001081563 | 14 | 14 | 9           | 112            | 861  | 38320  | 202,75 | 72,3                   |
| chr19 | 46278203 | 46278406 | DMPK   | NM_001081563 | 14 | 14 | 8           | 86             | 535  | 24202  | 118,64 | 100                    |
| chr19 | 46280524 | 46281112 | DMPK   | NM_001081563 | 14 | 14 | 7,6         | 264.207        | 645  | 28849  | 48,98  | 100.0,90.8             |
| chr19 | 46281403 | 46281576 | DMPK   | NM_001081563 | 14 | 14 | 5           | 94             | 63   | 2031   | 11,67  | 80,9                   |

|       |          |          |       |              |    |    |                         |                           |      |        |        |                                     |
|-------|----------|----------|-------|--------------|----|----|-------------------------|---------------------------|------|--------|--------|-------------------------------------|
| chr19 | 46281781 | 46281996 | DMPK  | NM_001081563 | 14 | 14 | 4                       | 149                       | 469  | 21605  | 100,02 | 79,9                                |
| chr19 | 46282522 | 46282826 | DMPK  | NM_001081563 | 14 | 14 | 3,2                     | 96,84                     | 291  | 12505  | 41     | 100,0,100,0                         |
| chr19 | 46283056 | 46283336 | DMPK  | NM_001081563 | 14 | 14 | 1                       | 282                       | 494  | 22925  | 81,58  | 92,9                                |
| chr19 | 47258744 | 47260224 | FKRP  | NM_024301    | 4  | 1  | 4                       | 1488                      | 780  | 35624  | 24,05  | 97,6                                |
| chr19 | 50364437 | 50365929 | PNKP  | NM_007254    | 17 | 16 | 17,16,15,14,13,12,11,10 | 118,62,88,110,62,97,93,71 | 621  | 29484  | 19,75  | 100,0,100,0,100,0,100,0,100,0,100,0 |
| chr19 | 50366929 | 50367132 | PNKP  | NM_007254    | 17 | 16 | 8                       | 72                        | 189  | 7369   | 36,12  | 100                                 |
| chr19 | 50367265 | 50367723 | PNKP  | NM_007254    | 17 | 16 | 7,6,5                   | 108,58,80                 | 1021 | 46820  | 102    | 59,3,100,0,100,0                    |
| chr19 | 50368278 | 50368647 | PNKP  | NM_007254    | 17 | 16 | 4                       | 300                       | 321  | 14512  | 39,22  | 88                                  |
| chr19 | 50369651 | 50369848 | PNKP  | NM_007254    | 17 | 16 | 3                       | 47                        | 548  | 23260  | 117,47 | 100                                 |
| chr19 | 50370225 | 50370425 | PNKP  | NM_007254    | 17 | 16 | 2                       | 151                       | 124  | 5196   | 25,85  | 76,2                                |
| chr20 | 3869713  | 3870390  | PANK2 | NM_153638    | 7  | 7  | 1                       | 628                       | 186  | 8803   | 12,98  | 100                                 |
| chr20 | 3888568  | 3888943  | PANK2 | NM_153638    | 7  | 7  | 2                       | 353                       | 1069 | 51144  | 136,02 | 100                                 |
| chr20 | 3891225  | 3891505  | PANK2 | NM_153638    | 7  | 7  | 3                       | 254                       | 977  | 42917  | 152,73 | 99,6                                |
| chr20 | 3893077  | 3893259  | PANK2 | NM_153638    | 7  | 7  | 4                       | 177                       | 430  | 19128  | 104,52 | 87,6                                |
| chr20 | 3897610  | 3897795  | PANK2 | NM_153638    | 7  | 7  | 5                       | 124                       | 272  | 11796  | 63,42  | 71                                  |
| chr20 | 3899292  | 3899477  | PANK2 | NM_153638    | 7  | 7  | 6                       | 126                       | 473  | 20692  | 111,25 | 100                                 |
| chr20 | 3903832  | 3904091  | PANK2 | NM_153638    | 7  | 7  | 7                       | 51                        | 158  | 6788   | 26,11  | 100                                 |
| chr20 | 8113194  | 8113456  | PLCB1 | NM_015192    | 32 | 32 | 1                       | 99                        | 37   | 1702   | 6,47   | 100                                 |
| chr20 | 8130864  | 8131058  | PLCB1 | NM_015192    | 32 | 32 | 2                       | 78                        | 530  | 22524  | 115,51 | 100                                 |
| chr20 | 8351911  | 8352087  | PLCB1 | NM_015192    | 32 | 32 | 3                       | 69                        | 436  | 18219  | 102,93 | 85,5                                |
| chr20 | 8608896  | 8609117  | PLCB1 | NM_015192    | 32 | 32 | 4                       | 138                       | 186  | 7974   | 35,92  | 100                                 |
| chr20 | 8626715  | 8626930  | PLCB1 | NM_015192    | 32 | 32 | 5                       | 80                        | 437  | 18668  | 86,43  | 100                                 |
| chr20 | 8628500  | 8628697  | PLCB1 | NM_015192    | 32 | 32 | 6                       | 54                        | 132  | 6123   | 30,92  | 100                                 |
| chr20 | 8629921  | 8630103  | PLCB1 | NM_015192    | 32 | 32 | 7                       | 76                        | 401  | 16628  | 90,86  | 100                                 |
| chr20 | 8637798  | 8638010  | PLCB1 | NM_015192    | 32 | 32 | 8                       | 101                       | 1065 | 48026  | 225,47 | 100                                 |
| chr20 | 8639182  | 8639370  | PLCB1 | NM_015192    | 32 | 32 | 9                       | 167                       | 410  | 17819  | 94,28  | 100                                 |
| chr20 | 8665581  | 8665787  | PLCB1 | NM_015192    | 32 | 32 | 10                      | 147                       | 1908 | 78210  | 377,83 | 98,6                                |
| chr20 | 8678323  | 8678526  | PLCB1 | NM_015192    | 32 | 32 | 11                      | 158                       | 395  | 17427  | 85,43  | 68,4                                |
| chr20 | 8689269  | 8689451  | PLCB1 | NM_015192    | 32 | 32 | 12                      | 83                        | 587  | 23899  | 130,6  | 100                                 |
| chr20 | 8696810  | 8697037  | PLCB1 | NM_015192    | 32 | 32 | 13                      | 85                        | 850  | 37876  | 166,12 | 100                                 |
| chr20 | 8698249  | 8698446  | PLCB1 | NM_015192    | 32 | 32 | 14                      | 178                       | 128  | 5573   | 28,15  | 72,5                                |
| chr20 | 8702919  | 8703095  | PLCB1 | NM_015192    | 32 | 32 | 15                      | 68                        | 234  | 10476  | 59,19  | 100                                 |
| chr20 | 8705250  | 8705435  | PLCB1 | NM_015192    | 32 | 32 | 16                      | 97                        | 261  | 10802  | 58,08  | 100                                 |
| chr20 | 8707963  | 8708163  | PLCB1 | NM_015192    | 32 | 32 | 17                      | 85                        | 299  | 13506  | 67,19  | 91,8                                |
| chr20 | 8709676  | 8709894  | PLCB1 | NM_015192    | 32 | 32 | 18                      | 125                       | 435  | 18415  | 84,09  | 100                                 |
| chr20 | 8713846  | 8714076  | PLCB1 | NM_015192    | 32 | 32 | 19                      | 155                       | 151  | 6554   | 28,37  | 100                                 |
| chr20 | 8717677  | 8717874  | PLCB1 | NM_015192    | 32 | 32 | 20                      | 165                       | 382  | 16678  | 84,23  | 98,8                                |
| chr20 | 8719854  | 8720072  | PLCB1 | NM_015192    | 32 | 32 | 21                      | 100                       | 140  | 5848   | 26,7   | 100                                 |
| chr20 | 8720930  | 8721157  | PLCB1 | NM_015192    | 32 | 32 | 22                      | 105                       | 235  | 9642   | 42,29  | 100                                 |
| chr20 | 8722068  | 8722271  | PLCB1 | NM_015192    | 32 | 32 | 23                      | 110                       | 577  | 25322  | 124,13 | 100                                 |
| chr20 | 8737613  | 8737786  | PLCB1 | NM_015192    | 32 | 32 | 24                      | 133                       | 9    | 379    | 2,18   | 70,7                                |
| chr20 | 8741013  | 8741207  | PLCB1 | NM_015192    | 32 | 32 | 25                      | 54                        | 154  | 6418   | 32,91  | 100                                 |
| chr20 | 8745737  | 8746002  | PLCB1 | NM_015192    | 32 | 32 | 26                      | 220                       | 397  | 18153  | 68,24  | 98,6                                |
| chr20 | 8755220  | 8755408  | PLCB1 | NM_015192    | 32 | 32 | 27                      | 181                       | 337  | 14076  | 74,48  | 81,2                                |
| chr20 | 8769029  | 8769297  | PLCB1 | NM_015192    | 32 | 32 | 28,29                   | 77,90                     | 162  | 7428   | 27,61  | 100,0,20,0                          |
| chr20 | 8770117  | 8770329  | PLCB1 | NM_015192    | 32 | 32 | 30                      | 58                        | 636  | 26447  | 124,16 | 100                                 |
| chr20 | 8770797  | 8770997  | PLCB1 | NM_015192    | 32 | 32 | 31                      | 87                        | 132  | 5187   | 25,81  | 100                                 |
| chr20 | 8862252  | 8862591  | PLCB1 | NM_015192    | 32 | 32 | 32                      | 228                       | 2868 | 128268 | 377,26 | 100                                 |
| chr20 | 10385836 | 10386332 | MKKS  | NM_018848    | 6  | 4  | 6                       | 441                       | 1098 | 52977  | 106,59 | 99,3                                |
| chr20 | 10388203 | 10388433 | MKKS  | NM_018848    | 6  | 4  | 5                       | 111                       | 676  | 29242  | 126,59 | 100                                 |
| chr20 | 10389200 | 10389403 | MKKS  | NM_018848    | 6  | 4  | 4                       | 176                       | 557  | 24730  | 121,23 | 72,7                                |
| chr20 | 10393177 | 10394245 | MKKS  | NM_018848    | 6  | 4  | 3                       | 985                       | 3273 | 156948 | 146,82 | 100                                 |
| chr20 | 30946398 | 30946607 | ASXL1 | NM_015338    | 12 | 12 | 1                       | 57                        | 1    | 25     | 0,12   | 50,9                                |
| chr20 | 30954142 | 30954327 | ASXL1 | NM_015338    | 12 | 12 | 2                       | 83                        | 381  | 16921  | 90,97  | 100                                 |
| chr20 | 30956711 | 30956899 | ASXL1 | NM_015338    | 12 | 12 | 3                       | 112                       | 115  | 4841   | 25,61  | 75,9                                |
| chr20 | 31016012 | 31016277 | ASXL1 | NM_015338    | 12 | 12 | 4,5                     | 121,98                    | 755  | 32807  | 123,33 | 33,1,100,0                          |
| chr20 | 31017042 | 31017266 | ASXL1 | NM_015338    | 12 | 12 | 6                       | 94                        | 324  | 14074  | 62,55  | 100                                 |

|       |          |          |         |              |    |    |       |            |      |        |        |                  |
|-------|----------|----------|---------|--------------|----|----|-------|------------|------|--------|--------|------------------|
| chr20 | 31017742 | 31017954 | ASXL1   | NM_015338    | 12 | 12 | 7     | 153        | 117  | 4126   | 19,37  | 75,2             |
| chr20 | 31019080 | 31019449 | ASXL1   | NM_015338    | 12 | 12 | 8,9   | 164,97     | 1980 | 95622  | 258,44 | 100,0,66.0       |
| chr20 | 31020611 | 31020805 | ASXL1   | NM_015338    | 12 | 12 | 10    | 106        | 302  | 13301  | 68,21  | 100              |
| chr20 | 31020994 | 31021677 | ASXL1   | NM_015338    | 12 | 12 | 11    | 634        | 3301 | 156022 | 228,1  | 93,2             |
| chr20 | 31022160 | 31025222 | ASXL1   | NM_015338    | 12 | 12 | 12    | 2907       | 8906 | 432873 | 141,32 | 100              |
| chr20 | 31350163 | 31350452 | DNMT3B  | NM_006892    | 23 | 22 | 1     | 315        | 0    | 0      | 0      | 83,2             |
| chr20 | 31367836 | 31368202 | DNMT3B  | NM_006892    | 23 | 22 | 2     | 142        | 714  | 32438  | 88,39  | 51,4             |
| chr20 | 31369161 | 31369358 | DNMT3B  | NM_006892    | 23 | 22 | 3     | 62         | 592  | 26123  | 131,93 | 96,8             |
| chr20 | 31372586 | 31372786 | DNMT3B  | NM_006892    | 23 | 22 | 4     | 102        | 297  | 12403  | 61,71  | 78,4             |
| chr20 | 31374213 | 31374407 | DNMT3B  | NM_006892    | 23 | 22 | 5     | 126        | 230  | 9696   | 49,72  | 79,4             |
| chr20 | 31374940 | 31375214 | DNMT3B  | NM_006892    | 23 | 22 | 6     | 222        | 435  | 18430  | 67,02  | 80,6             |
| chr20 | 31376563 | 31376769 | DNMT3B  | NM_006892    | 23 | 22 | 7     | 159        | 397  | 16791  | 81,12  | 69,2             |
| chr20 | 31379303 | 31379500 | DNMT3B  | NM_006892    | 23 | 22 | 8     | 108        | 135  | 5711   | 28,84  | 87               |
| chr20 | 31380403 | 31380594 | DNMT3B  | NM_006892    | 23 | 22 | 9     | 145        | 63   | 2729   | 14,21  | 100              |
| chr20 | 31381337 | 31381540 | DNMT3B  | NM_006892    | 23 | 22 | 10    | 60         | 281  | 11062  | 54,23  | 100              |
| chr20 | 31383283 | 31383545 | DNMT3B  | NM_006892    | 23 | 22 | 11,12 | 126,45     | 665  | 28036  | 106,6  | 46,0,100.0       |
| chr20 | 31384581 | 31385095 | DNMT3B  | NM_006892    | 23 | 22 | 13,14 | 80,113     | 2790 | 131945 | 256,2  | 100,0,91.2       |
| chr20 | 31386332 | 31386532 | DNMT3B  | NM_006892    | 23 | 22 | 15    | 184        | 296  | 13058  | 64,97  | 64,1             |
| chr20 | 31387057 | 31387266 | DNMT3B  | NM_006892    | 23 | 22 | 16    | 85         | 230  | 10474  | 49,88  | 91,8             |
| chr20 | 31387985 | 31388179 | DNMT3B  | NM_006892    | 23 | 22 | 17    | 146        | 666  | 25891  | 132,77 | 82,2             |
| chr20 | 31388561 | 31388749 | DNMT3B  | NM_006892    | 23 | 22 | 18    | 91         | 1222 | 52945  | 280,13 | 100              |
| chr20 | 31389012 | 31389218 | DNMT3B  | NM_006892    | 23 | 22 | 19    | 149        | 586  | 25418  | 122,79 | 90,6             |
| chr20 | 31390202 | 31390396 | DNMT3B  | NM_006892    | 23 | 22 | 20    | 86         | 673  | 29197  | 149,73 | 87,2             |
| chr20 | 31393012 | 31393218 | DNMT3B  | NM_006892    | 23 | 22 | 21    | 70         | 455  | 20348  | 98,3   | 100              |
| chr20 | 31393928 | 31394119 | DNMT3B  | NM_006892    | 23 | 22 | 22    | 119        | 245  | 9706   | 50,55  | 88,2             |
| chr20 | 31395483 | 31395849 | DNMT3B  | NM_006892    | 23 | 22 | 23    | 142        | 1136 | 52125  | 142,03 | 100              |
| chr20 | 32868738 | 32868908 | AHCY    | NM_001161766 | 10 | 9  | 10    | 132        | 382  | 15967  | 93,37  | 52,3             |
| chr20 | 32873314 | 32873517 | AHCY    | NM_001161766 | 10 | 9  | 9     | 195        | 60   | 2500   | 12,25  | 65,1             |
| chr20 | 32878077 | 32878680 | AHCY    | NM_001161766 | 10 | 9  | 8,7,6 | 118,88,208 | 2626 | 122997 | 203,64 | 100,0,100,0,69.2 |
| chr20 | 32879252 | 32879452 | AHCY    | NM_001161766 | 10 | 9  | 5     | 113        | 1087 | 43243  | 215,14 | 76,1             |
| chr20 | 32880090 | 32880263 | AHCY    | NM_001161766 | 10 | 9  | 4     | 150        | 68   | 2889   | 16,6   | 66,7             |
| chr20 | 32881889 | 32882083 | AHCY    | NM_001161766 | 10 | 9  | 3     | 76         | 142  | 5983   | 30,68  | 97,4             |
| chr20 | 32882955 | 32883330 | AHCY    | NM_001161766 | 10 | 9  | 2     | 135        | 403  | 18424  | 49     | 96,3             |
| chr20 | 33516489 | 33516695 | GSS     | NM_000178    | 13 | 12 | 13    | 124        | 1337 | 57925  | 279,83 | 52,4             |
| chr20 | 33517272 | 33517460 | GSS     | NM_000178    | 13 | 12 | 12    | 190        | 1048 | 43909  | 232,32 | 64,2             |
| chr20 | 33519154 | 33519345 | GSS     | NM_000178    | 13 | 12 | 11    | 82         | 320  | 13543  | 70,54  | 81,7             |
| chr20 | 33519810 | 33520010 | GSS     | NM_000178    | 13 | 12 | 10    | 195        | 1166 | 50654  | 252,01 | 65,1             |
| chr20 | 33523368 | 33523562 | GSS     | NM_000178    | 13 | 12 | 9     | 67         | 152  | 6103   | 31,3   | 100              |
| chr20 | 33524522 | 33524817 | GSS     | NM_000178    | 13 | 12 | 8,7   | 78,81      | 413  | 18532  | 62,61  | 100,0,88.9       |
| chr20 | 33529398 | 33529613 | GSS     | NM_000178    | 13 | 12 | 6     | 117        | 698  | 29118  | 134,81 | 83,8             |
| chr20 | 33530326 | 33530529 | GSS     | NM_000178    | 13 | 12 | 5     | 140        | 258  | 10523  | 51,58  | 75               |
| chr20 | 33530746 | 33530928 | GSS     | NM_000178    | 13 | 12 | 4     | 76         | 279  | 11685  | 63,85  | 84,2             |
| chr20 | 33533803 | 33534000 | GSS     | NM_000178    | 13 | 12 | 3     | 146        | 474  | 19551  | 98,74  | 67,8             |
| chr20 | 33539514 | 33539726 | GSS     | NM_000178    | 13 | 12 | 2     | 129        | 472  | 21560  | 101,22 | 100              |
| chr20 | 34761624 | 34761809 | EPB41L1 | NM_012156    | 22 | 21 | 2     | 177        | 238  | 9902   | 53,24  | 62,1             |
| chr20 | 34763385 | 34763591 | EPB41L1 | NM_012156    | 22 | 21 | 3     | 165        | 203  | 9210   | 44,49  | 72,1             |
| chr20 | 34765870 | 34766088 | EPB41L1 | NM_012156    | 22 | 21 | 4     | 105        | 604  | 24311  | 111,01 | 100              |
| chr20 | 34766442 | 34766639 | EPB41L1 | NM_012156    | 22 | 21 | 5     | 43         | 262  | 11668  | 58,93  | 100              |
| chr20 | 34770056 | 34770274 | EPB41L1 | NM_012156    | 22 | 21 | 6     | 76         | 818  | 36811  | 168,09 | 100              |
| chr20 | 34773064 | 34773359 | EPB41L1 | NM_012156    | 22 | 21 | 7     | 219        | 407  | 18472  | 62,41  | 88,6             |
| chr20 | 34775469 | 34775678 | EPB41L1 | NM_012156    | 22 | 21 | 8     | 88         | 794  | 32708  | 155,75 | 92               |
| chr20 | 34776286 | 34776474 | EPB41L1 | NM_012156    | 22 | 21 | 9     | 153        | 212  | 9192   | 48,63  | 88,9             |
| chr20 | 34778090 | 34778293 | EPB41L1 | NM_012156    | 22 | 21 | 10    | 98         | 1312 | 57510  | 281,91 | 96,9             |
| chr20 | 34778573 | 34778764 | EPB41L1 | NM_012156    | 22 | 21 | 11    | 176        | 341  | 14745  | 76,8   | 83,5             |
| chr20 | 34782182 | 34782367 | EPB41L1 | NM_012156    | 22 | 21 | 12    | 149        | 249  | 9783   | 52,6   | 67,8             |
| chr20 | 34783186 | 34783407 | EPB41L1 | NM_012156    | 22 | 21 | 13    | 36         | 3415 | 141959 | 639,45 | 100              |
| chr20 | 34785723 | 34785896 | EPB41L1 | NM_012156    | 22 | 21 | 14    | 183        | 335  | 14971  | 86,04  | 63,4             |

|       |          |          |         |           |    |    |           |               |      |        |        |                         |
|-------|----------|----------|---------|-----------|----|----|-----------|---------------|------|--------|--------|-------------------------|
| chr20 | 34797331 | 34797774 | EPB41L1 | NM_012156 | 22 | 21 | 15        | 411           | 673  | 31679  | 71,35  | 88,8                    |
| chr20 | 34800127 | 34800318 | EPB41L1 | NM_012156 | 22 | 21 | 16        | 105           | 176  | 7998   | 41,66  | 100                     |
| chr20 | 34802253 | 34802462 | EPB41L1 | NM_012156 | 22 | 21 | 17        | 84            | 765  | 30452  | 145,01 | 100                     |
| chr20 | 34806671 | 34806892 | EPB41L1 | NM_012156 | 22 | 21 | 18        | 87            | 288  | 12313  | 55,46  | 100                     |
| chr20 | 34807669 | 34807884 | EPB41L1 | NM_012156 | 22 | 21 | 19        | 84            | 464  | 20583  | 95,29  | 100                     |
| chr20 | 34809740 | 34809919 | EPB41L1 | NM_012156 | 22 | 21 | 20        | 81            | 1068 | 46465  | 258,14 | 100                     |
| chr20 | 34810100 | 34810282 | EPB41L1 | NM_012156 | 22 | 21 | 21        | 117           | 513  | 20857  | 113,97 | 70,9                    |
| chr20 | 34817246 | 34817446 | EPB41L1 | NM_012156 | 22 | 21 | 22        | 9             | 131  | 5398   | 26,86  | 100                     |
| chr20 | 47538371 | 47538553 | ARFGEF2 | NM_006420 | 39 | 39 | 1         | 121           | 76   | 3141   | 17,16  | 100                     |
| chr20 | 47557692 | 47557868 | ARFGEF2 | NM_006420 | 39 | 39 | 2         | 31            | 69   | 2989   | 16,89  | 100                     |
| chr20 | 47558338 | 47558541 | ARFGEF2 | NM_006420 | 39 | 39 | 3         | 124           | 1037 | 46193  | 226,44 | 100                     |
| chr20 | 47567901 | 47568083 | ARFGEF2 | NM_006420 | 39 | 39 | 4         | 147           | 216  | 9259   | 50,6   | 72,1                    |
| chr20 | 47569231 | 47569425 | ARFGEF2 | NM_006420 | 39 | 39 | 5         | 180           | 526  | 22285  | 114,28 | 100                     |
| chr20 | 47570018 | 47570292 | ARFGEF2 | NM_006420 | 39 | 39 | 6         | 235           | 285  | 12675  | 46,09  | 85,1                    |
| chr20 | 47580240 | 47580434 | ARFGEF2 | NM_006420 | 39 | 39 | 7         | 69            | 206  | 8997   | 46,14  | 98,6                    |
| chr20 | 47582324 | 47582509 | ARFGEF2 | NM_006420 | 39 | 39 | 8         | 152           | 182  | 7917   | 42,56  | 66,4                    |
| chr20 | 47585714 | 47585923 | ARFGEF2 | NM_006420 | 39 | 39 | 9         | 131           | 1087 | 48028  | 228,7  | 77,1                    |
| chr20 | 47587597 | 47587880 | ARFGEF2 | NM_006420 | 39 | 39 | 10        | 235           | 1038 | 47742  | 168,11 | 95,3                    |
| chr20 | 47588773 | 47588976 | ARFGEF2 | NM_006420 | 39 | 39 | 11        | 100           | 353  | 15605  | 76,5   | 100                     |
| chr20 | 47589684 | 47589896 | ARFGEF2 | NM_006420 | 39 | 39 | 12        | 140           | 266  | 11650  | 54,69  | 98,6                    |
| chr20 | 47591181 | 47591381 | ARFGEF2 | NM_006420 | 39 | 39 | 13        | 109           | 507  | 21118  | 105,06 | 72,5                    |
| chr20 | 47592604 | 47592816 | ARFGEF2 | NM_006420 | 39 | 39 | 14        | 184           | 329  | 13395  | 62,89  | 72,3                    |
| chr20 | 47601176 | 47601349 | ARFGEF2 | NM_006420 | 39 | 39 | 15        | 112           | 498  | 21666  | 124,52 | 75                      |
| chr20 | 47601920 | 47602132 | ARFGEF2 | NM_006420 | 39 | 39 | 16        | 206           | 908  | 39125  | 183,69 | 91,3                    |
| chr20 | 47604809 | 47605184 | ARFGEF2 | NM_006420 | 39 | 39 | 17,18     | 85.172        | 603  | 26628  | 70,82  | 100,0,91.3              |
| chr20 | 47605873 | 47606307 | ARFGEF2 | NM_006420 | 39 | 39 | 19,20     | 152.129       | 1287 | 60507  | 139,1  | 66.4,100.0              |
| chr20 | 47607630 | 47607827 | ARFGEF2 | NM_006420 | 39 | 39 | 21        | 159           | 963  | 42347  | 213,87 | 66,7                    |
| chr20 | 47610901 | 47611086 | ARFGEF2 | NM_006420 | 39 | 39 | 22        | 148           | 381  | 15609  | 83,92  | 66,9                    |
| chr20 | 47612212 | 47612397 | ARFGEF2 | NM_006420 | 39 | 39 | 23        | 100           | 558  | 24483  | 131,63 | 78                      |
| chr20 | 47614699 | 47615056 | ARFGEF2 | NM_006420 | 39 | 39 | 24,25     | 41.170        | 589  | 28516  | 79,65  | 100.0,100.0             |
| chr20 | 47621558 | 47621758 | ARFGEF2 | NM_006420 | 39 | 39 | 26        | 152           | 599  | 26192  | 130,31 | 100                     |
| chr20 | 47626829 | 47627017 | ARFGEF2 | NM_006420 | 39 | 39 | 27        | 173           | 484  | 20288  | 107,34 | 65,3                    |
| chr20 | 47628395 | 47628577 | ARFGEF2 | NM_006420 | 39 | 39 | 28        | 161           | 918  | 40749  | 222,67 | 72,7                    |
| chr20 | 47630015 | 47630473 | ARFGEF2 | NM_006420 | 39 | 39 | 29,30     | 131.130       | 3558 | 174013 | 379,11 | 100.0,81.5              |
| chr20 | 47632754 | 47632945 | ARFGEF2 | NM_006420 | 39 | 39 | 31        | 136           | 634  | 26716  | 139,15 | 94,9                    |
| chr20 | 47633798 | 47634155 | ARFGEF2 | NM_006420 | 39 | 39 | 32,33     | 139,55        | 762  | 35314  | 98,64  | 91.4,100.0              |
| chr20 | 47635368 | 47635577 | ARFGEF2 | NM_006420 | 39 | 39 | 34        | 115           | 191  | 8773   | 41,78  | 100                     |
| chr20 | 47639501 | 47639677 | ARFGEF2 | NM_006420 | 39 | 39 | 35        | 131           | 338  | 15009  | 84,8   | 68,7                    |
| chr20 | 47641797 | 47641988 | ARFGEF2 | NM_006420 | 39 | 39 | 36        | 169           | 610  | 24520  | 127,71 | 82,2                    |
| chr20 | 47645035 | 47645235 | ARFGEF2 | NM_006420 | 39 | 39 | 37        | 139           | 241  | 10481  | 52,14  | 100                     |
| chr20 | 47648502 | 47648714 | ARFGEF2 | NM_006420 | 39 | 39 | 38        | 118           | 1013 | 46047  | 216,18 | 100                     |
| chr20 | 47649473 | 47649848 | ARFGEF2 | NM_006420 | 39 | 39 | 39        | 177           | 715  | 33129  | 88,11  | 100                     |
| chr20 | 49551528 | 49551805 | DPM1    | NM_003859 | 9  | 9  | 9         | 105           | 346  | 14060  | 50,58  | 100                     |
| chr20 | 49552620 | 49552802 | DPM1    | NM_003859 | 9  | 9  | 8         | 115           | 918  | 40272  | 220,07 | 100                     |
| chr20 | 49557347 | 49557686 | DPM1    | NM_003859 | 9  | 9  | 7         | 69            | 374  | 16719  | 49,17  | 100                     |
| chr20 | 49558449 | 49558664 | DPM1    | NM_003859 | 9  | 9  | 6         | 96            | 1611 | 67783  | 313,81 | 100                     |
| chr20 | 49562311 | 49562487 | DPM1    | NM_003859 | 9  | 9  | 4         | 77            | 676  | 29699  | 167,79 | 100                     |
| chr20 | 49565037 | 49565249 | DPM1    | NM_003859 | 9  | 9  | 3         | 34            | 296  | 13018  | 61,12  | 100                     |
| chr20 | 49571672 | 49571866 | DPM1    | NM_003859 | 9  | 9  | 2         | 100           | 953  | 43271  | 221,9  | 100                     |
| chr20 | 49574894 | 49575079 | DPM1    | NM_003859 | 9  | 9  | 1         | 161           | 541  | 21816  | 117,29 | 100                     |
| chr20 | 57428316 | 57429627 | GNAS    | NM_080425 | 13 | 13 | 1         | 2068          | 1990 | 94032  | 71,67  | 63,2                    |
| chr20 | 57429694 | 57430427 | GNAS    | NM_080425 | 13 | 13 | 1         | 2068          | 250  | 11703  | 15,94  | 33,6                    |
| chr20 | 57470677 | 57470877 | GNAS    | NM_080425 | 13 | 13 | 2         | 73            | 188  | 8322   | 41,4   | 86,3                    |
| chr20 | 57473962 | 57474144 | GNAS    | NM_080425 | 13 | 13 | 3         | 45            | 167  | 7444   | 40,68  | 100                     |
| chr20 | 57478518 | 57478822 | GNAS    | NM_080425 | 13 | 13 | 4,5       | 55.120        | 1661 | 80071  | 262,53 | 100.0,80.0              |
| chr20 | 57480332 | 57480526 | GNAS    | NM_080425 | 13 | 13 | 6         | 98            | 508  | 22812  | 116,98 | 90,8                    |
| chr20 | 57484285 | 57485190 | GNAS    | NM_080425 | 13 | 13 | 8,9,10,11 | 74,59,121,131 | 4258 | 202785 | 223,82 | 100.0,100.0,100.0,100.0 |

|       |          |          |        |              |    |    |       |           |      |        |        |                  |
|-------|----------|----------|--------|--------------|----|----|-------|-----------|------|--------|--------|------------------|
| chr20 | 57485340 | 57485552 | GNAS   | NM_080425    | 13 | 13 | 12    | 68        | 192  | 8641   | 40,57  | 100              |
| chr20 | 57485806 | 57485979 | GNAS   | NM_080425    | 13 | 13 | 13    | 147       | 770  | 33206  | 190,84 | 53,7             |
| chr20 | 62037882 | 62038737 | KCNQ2  | NM_172107    | 17 | 17 | 17    | 732       | 375  | 17497  | 20,44  | 100              |
| chr20 | 62039793 | 62039993 | KCNQ2  | NM_172107    | 17 | 17 | 16    | 124       | 53   | 2420   | 12,04  | 78,2             |
| chr20 | 62044543 | 62044915 | KCNQ2  | NM_172107    | 17 | 17 | 15    | 132       | 325  | 13318  | 35,71  | 85,6             |
| chr20 | 62045429 | 62045608 | KCNQ2  | NM_172107    | 17 | 17 | 14    | 106       | 45   | 2055   | 11,42  | 100              |
| chr20 | 62046284 | 62046567 | KCNQ2  | NM_172107    | 17 | 17 | 13    | 224       | 255  | 11239  | 39,57  | 87,5             |
| chr20 | 62050931 | 62051128 | KCNQ2  | NM_172107    | 17 | 17 | 12    | 54        | 33   | 1505   | 7,6    | 100              |
| chr20 | 62059668 | 62059838 | KCNQ2  | NM_172107    | 17 | 17 | 10    | 69        | 87   | 3765   | 22,02  | 100              |
| chr20 | 62062679 | 62062879 | KCNQ2  | NM_172107    | 17 | 17 | 9     | 30        | 49   | 1835   | 9,13   | 100              |
| chr20 | 62065036 | 62065218 | KCNQ2  | NM_172107    | 17 | 17 | 8     | 95        | 91   | 3710   | 20,27  | 60               |
| chr20 | 62069964 | 62070149 | KCNQ2  | NM_172107    | 17 | 17 | 7     | 96        | 398  | 18000  | 96,77  | 100              |
| chr20 | 62070902 | 62071090 | KCNQ2  | NM_172107    | 17 | 17 | 6     | 111       | 151  | 6152   | 32,55  | 100              |
| chr20 | 62073715 | 62073921 | KCNQ2  | NM_172107    | 17 | 17 | 5     | 126       | 307  | 13707  | 66,22  | 100              |
| chr20 | 62076002 | 62076196 | KCNQ2  | NM_172107    | 17 | 17 | 4     | 176       | 24   | 1084   | 5,56   | 100              |
| chr20 | 62076586 | 62076798 | KCNQ2  | NM_172107    | 17 | 17 | 3     | 127       | 70   | 3064   | 14,38  | 100              |
| chr20 | 62078059 | 62078244 | KCNQ2  | NM_172107    | 17 | 17 | 2     | 91        | 105  | 4282   | 23,02  | 100              |
| chr20 | 62103422 | 62103954 | KCNQ2  | NM_172107    | 17 | 17 | 1     | 296       | 12   | 588    | 1,1    | 100              |
| chr21 | 38126413 | 38126684 | HLCS   | NM_001242784 | 12 | 9  | 12    | 172       | 378  | 17911  | 65,85  | 80,2             |
| chr21 | 38128888 | 38129076 | HLCS   | NM_001242784 | 12 | 9  | 11    | 214       | 1087 | 47011  | 248,74 | 79               |
| chr21 | 38131999 | 38132169 | HLCS   | NM_001242784 | 12 | 9  | 10    | 115       | 393  | 15623  | 91,36  | 100              |
| chr21 | 38137226 | 38137432 | HLCS   | NM_001242784 | 12 | 9  | 9     | 161       | 1150 | 50940  | 246,09 | 74,5             |
| chr21 | 38139392 | 38139583 | HLCS   | NM_001242784 | 12 | 9  | 8     | 68        | 486  | 20100  | 104,69 | 95,6             |
| chr21 | 38269230 | 38269486 | HLCS   | NM_001242784 | 12 | 9  | 7     | 272       | 363  | 16428  | 63,92  | 74,3             |
| chr21 | 38302586 | 38302765 | HLCS   | NM_001242784 | 12 | 9  | 6     | 183       | 442  | 19891  | 110,51 | 80,9             |
| chr21 | 38308741 | 38309753 | HLCS   | NM_001242784 | 12 | 9  | 5     | 944       | 5249 | 250312 | 247,1  | 100              |
| chr21 | 38311156 | 38311374 | HLCS   | NM_001242784 | 12 | 9  | 4     | 52        | 385  | 15828  | 72,27  | 53,8             |
| chr21 | 38334302 | 38334496 | HLCS   | NM_001242784 | 12 | 9  | 2     | 135       | 256  | 11845  | 60,74  | 100              |
| chr21 | 38338740 | 38338940 | HLCS   | NM_001242784 | 12 | 9  | 1     | 213       | 0    | 0      | 0      | 92,5             |
| chr21 | 38845058 | 38845231 | DYRK1A | NM_001396    | 11 | 11 | 2     | 197       | 801  | 33587  | 193,03 | 63,5             |
| chr21 | 38850412 | 38850624 | DYRK1A | NM_001396    | 11 | 11 | 3     | 120       | 438  | 19755  | 92,75  | 100              |
| chr21 | 38852873 | 38853076 | DYRK1A | NM_001396    | 11 | 11 | 4     | 189       | 232  | 10061  | 49,32  | 72,5             |
| chr21 | 38858775 | 38858987 | DYRK1A | NM_001396    | 11 | 11 | 5     | 148       | 268  | 12329  | 57,88  | 95,9             |
| chr21 | 38862494 | 38862786 | DYRK1A | NM_001396    | 11 | 11 | 6     | 287       | 476  | 21530  | 73,48  | 94,1             |
| chr21 | 38865291 | 38865497 | DYRK1A | NM_001396    | 11 | 11 | 7     | 147       | 623  | 27769  | 134,15 | 100              |
| chr21 | 38868404 | 38868580 | DYRK1A | NM_001396    | 11 | 11 | 8     | 141       | 132  | 5777   | 32,64  | 100              |
| chr21 | 38877513 | 38877843 | DYRK1A | NM_001396    | 11 | 11 | 9     | 307       | 1218 | 56881  | 171,85 | 84               |
| chr21 | 38878448 | 38878728 | DYRK1A | NM_001396    | 11 | 11 | 10    | 125       | 950  | 42829  | 152,42 | 63,2             |
| chr21 | 38884130 | 38884967 | DYRK1A | NM_001396    | 11 | 11 | 11    | 621       | 6180 | 300444 | 358,53 | 100              |
| chr21 | 44473852 | 44474135 | CBS    | NM_000071    | 17 | 15 | 17    | 104       | 256  | 11413  | 40,19  | 100              |
| chr21 | 44476914 | 44477126 | CBS    | NM_000071    | 17 | 15 | 16    | 85        | 89   | 4135   | 19,41  | 98,8             |
| chr21 | 44478241 | 44478438 | CBS    | NM_000071    | 17 | 15 | 15    | 109       | 339  | 14615  | 73,81  | 100              |
| chr21 | 44478901 | 44479122 | CBS    | NM_000071    | 17 | 15 | 14    | 135       | 132  | 5377   | 24,22  | 100              |
| chr21 | 44479280 | 44479459 | CBS    | NM_000071    | 17 | 15 | 13    | 78        | 177  | 7827   | 43,48  | 100              |
| chr21 | 44480449 | 44480628 | CBS    | NM_000071    | 17 | 15 | 12    | 106       | 62   | 2412   | 13,4   | 73,6             |
| chr21 | 44482377 | 44482577 | CBS    | NM_000071    | 17 | 15 | 11    | 85        | 456  | 20281  | 100,9  | 100              |
| chr21 | 44483079 | 44483300 | CBS    | NM_000071    | 17 | 15 | 10    | 126       | 531  | 22106  | 99,58  | 87,3             |
| chr21 | 44484003 | 44484227 | CBS    | NM_000071    | 17 | 15 | 9     | 92        | 82   | 3819   | 16,97  | 100              |
| chr21 | 44485223 | 44485761 | CBS    | NM_000071    | 17 | 15 | 8,7,6 | 70,135,80 | 723  | 34132  | 63,32  | 100,0,100,0,45,0 |
| chr21 | 44486391 | 44486585 | CBS    | NM_000071    | 17 | 15 | 5     | 135       | 89   | 4102   | 21,04  | 71,9             |
| chr21 | 44488643 | 44488822 | CBS    | NM_000071    | 17 | 15 | 4     | 107       | 67   | 2906   | 16,14  | 77,6             |
| chr21 | 44492032 | 44492226 | CBS    | NM_000071    | 17 | 15 | 3     | 209       | 99   | 3730   | 19,13  | 63,2             |
| chr21 | 47744061 | 47744246 | PCNT   | NM_006031    | 47 | 47 | 1     | 54        | 6    | 280    | 1,51   | 100              |
| chr21 | 47746236 | 47746424 | PCNT   | NM_006031    | 47 | 47 | 2     | 213       | 92   | 3795   | 20,08  | 62,9             |
| chr21 | 47754271 | 47754391 | PCNT   | NM_006031    | 47 | 47 | 3     | 372       | 31   | 1225   | 10,12  | 21,8             |
| chr21 | 47754541 | 47754661 | PCNT   | NM_006031    | 47 | 47 | 3     | 372       | 200  | 5193   | 42,92  | 32,5             |
| chr21 | 47765930 | 47766115 | PCNT   | NM_006031    | 47 | 47 | 4     | 81        | 873  | 36159  | 194,4  | 91,4             |



|       |          |          |       |           |    |    |       |        |      |        |        |             |
|-------|----------|----------|-------|-----------|----|----|-------|--------|------|--------|--------|-------------|
| chr21 | 47766560 | 47766855 | PCNT  | NM_006031 | 47 | 47 | 5     | 256    | 248  | 9874   | 33,36  | 77,7        |
| chr21 | 47767352 | 47767561 | PCNT  | NM_006031 | 47 | 47 | 6     | 56     | 200  | 8759   | 41,71  | 100         |
| chr21 | 47768975 | 47769178 | PCNT  | NM_006031 | 47 | 47 | 7     | 175    | 181  | 8340   | 40,88  | 72          |
| chr21 | 47769604 | 47769792 | PCNT  | NM_006031 | 47 | 47 | 8     | 137    | 207  | 9499   | 50,26  | 95,6        |
| chr21 | 47771328 | 47771537 | PCNT  | NM_006031 | 47 | 47 | 9     | 112    | 169  | 7763   | 36,97  | 100         |
| chr21 | 47772967 | 47773238 | PCNT  | NM_006031 | 47 | 47 | 10    | 223    | 673  | 28067  | 103,19 | 99,1        |
| chr21 | 47773826 | 47773996 | PCNT  | NM_006031 | 47 | 47 | 11    | 82     | 75   | 3192   | 18,67  | 100         |
| chr21 | 47775287 | 47775508 | PCNT  | NM_006031 | 47 | 47 | 12    | 175    | 322  | 13408  | 60,4   | 81,1        |
| chr21 | 47776857 | 47777125 | PCNT  | NM_006031 | 47 | 47 | 13    | 218    | 394  | 17804  | 66,19  | 100         |
| chr21 | 47783350 | 47783775 | PCNT  | NM_006031 | 47 | 47 | 14    | 455    | 671  | 31792  | 74,63  | 83,7        |
| chr21 | 47786416 | 47787004 | PCNT  | NM_006031 | 47 | 47 | 15    | 556    | 816  | 37266  | 63,27  | 91          |
| chr21 | 47801620 | 47801820 | PCNT  | NM_006031 | 47 | 47 | 16    | 147    | 483  | 21865  | 108,78 | 92,5        |
| chr21 | 47805677 | 47805853 | PCNT  | NM_006031 | 47 | 47 | 17    | 152    | 285  | 12473  | 70,47  | 70,4        |
| chr21 | 47808582 | 47808752 | PCNT  | NM_006031 | 47 | 47 | 18    | 143    | 93   | 4152   | 24,28  | 67,1        |
| chr21 | 47809244 | 47809435 | PCNT  | NM_006031 | 47 | 47 | 19    | 233    | 187  | 7634   | 39,76  | 44,2        |
| chr21 | 47810496 | 47810693 | PCNT  | NM_006031 | 47 | 47 | 20    | 163    | 258  | 10859  | 54,84  | 66,9        |
| chr21 | 47811024 | 47811212 | PCNT  | NM_006031 | 47 | 47 | 21    | 213    | 76   | 3308   | 17,5   | 62,9        |
| chr21 | 47817186 | 47817472 | PCNT  | NM_006031 | 47 | 47 | 22    | 230    | 1177 | 51241  | 178,54 | 97          |
| chr21 | 47817944 | 47818203 | PCNT  | NM_006031 | 47 | 47 | 23,24 | 117,21 | 49   | 2237   | 8,6    | 86,3,100.0  |
| chr21 | 47819506 | 47819697 | PCNT  | NM_006031 | 47 | 47 | 25    | 207    | 59   | 2540   | 13,23  | 92,8        |
| chr21 | 47821398 | 47821574 | PCNT  | NM_006031 | 47 | 47 | 26    | 171    | 404  | 16642  | 94,02  | 64,3        |
| chr21 | 47822235 | 47822405 | PCNT  | NM_006031 | 47 | 47 | 27    | 153    | 496  | 20165  | 117,92 | 100         |
| chr21 | 47831036 | 47831956 | PCNT  | NM_006031 | 47 | 47 | 28    | 879    | 573  | 27185  | 29,52  | 97,2        |
| chr21 | 47832701 | 47832892 | PCNT  | NM_006031 | 47 | 47 | 29    | 156    | 861  | 35574  | 185,28 | 91          |
| chr21 | 47835942 | 47836684 | PCNT  | NM_006031 | 47 | 47 | 30    | 771    | 2111 | 100480 | 135,24 | 91,1        |
| chr21 | 47838116 | 47838328 | PCNT  | NM_006031 | 47 | 47 | 31    | 103    | 255  | 10408  | 48,86  | 100         |
| chr21 | 47841863 | 47842051 | PCNT  | NM_006031 | 47 | 47 | 32    | 155    | 144  | 6061   | 32,07  | 100         |
| chr21 | 47845789 | 47845962 | PCNT  | NM_006031 | 47 | 47 | 33    | 141    | 531  | 22939  | 131,83 | 68,8        |
| chr21 | 47847495 | 47847698 | PCNT  | NM_006031 | 47 | 47 | 34    | 174    | 188  | 8344   | 40,9   | 93,7        |
| chr21 | 47848258 | 47848440 | PCNT  | NM_006031 | 47 | 47 | 35    | 196    | 108  | 4331   | 23,67  | 67,3        |
| chr21 | 47849843 | 47850099 | PCNT  | NM_006031 | 47 | 47 | 36    | 223    | 416  | 19448  | 75,67  | 78,9        |
| chr21 | 47850461 | 47850667 | PCNT  | NM_006031 | 47 | 47 | 37    | 151    | 201  | 8362   | 40,4   | 73,5        |
| chr21 | 47851385 | 47852056 | PCNT  | NM_006031 | 47 | 47 | 38    | 687    | 951  | 38770  | 57,69  | 89,4        |
| chr21 | 47855753 | 47856006 | PCNT  | NM_006031 | 47 | 47 | 39    | 245    | 179  | 8410   | 33,11  | 77,6        |
| chr21 | 47856821 | 47856997 | PCNT  | NM_006031 | 47 | 47 | 40    | 103    | 149  | 5661   | 31,98  | 100         |
| chr21 | 47858030 | 47858218 | PCNT  | NM_006031 | 47 | 47 | 41    | 174    | 167  | 7505   | 39,71  | 81,6        |
| chr21 | 47860021 | 47860212 | PCNT  | NM_006031 | 47 | 47 | 42    | 120    | 358  | 14765  | 76,9   | 79,2        |
| chr21 | 47860685 | 47860947 | PCNT  | NM_006031 | 47 | 47 | 43    | 230    | 181  | 7672   | 29,17  | 78,3        |
| chr21 | 47862302 | 47862472 | PCNT  | NM_006031 | 47 | 47 | 44    | 77     | 411  | 17222  | 100,71 | 81,8        |
| chr21 | 47863622 | 47863816 | PCNT  | NM_006031 | 47 | 47 | 45    | 139    | 115  | 5135   | 26,33  | 67,6        |
| chr21 | 47864573 | 47864776 | PCNT  | NM_006031 | 47 | 47 | 46    | 128    | 468  | 20601  | 100,99 | 100         |
| chr21 | 47865148 | 47865431 | PCNT  | NM_006031 | 47 | 47 | 47    | 44     | 999  | 45377  | 159,78 | 100         |
| chr22 | 18560821 | 18561667 | PEX26 | NM_017929 | 6  | 5  | 2     | 230    | 1290 | 60812  | 71,8   | 100         |
| chr22 | 18562684 | 18562866 | PEX26 | NM_017929 | 6  | 5  | 3     | 141    | 142  | 6446   | 35,22  | 68,8        |
| chr22 | 18566110 | 18566470 | PEX26 | NM_017929 | 6  | 5  | 4     | 296    | 317  | 14439  | 40     | 90,5        |
| chr22 | 18567880 | 18568071 | PEX26 | NM_017929 | 6  | 5  | 5     | 147    | 996  | 41722  | 217,3  | 98,6        |
| chr22 | 18570630 | 18571082 | PEX26 | NM_017929 | 6  | 5  | 6     | 104    | 2067 | 94971  | 209,65 | 100         |
| chr22 | 18900572 | 18901086 | PRODH | NM_016335 | 15 | 14 | 15,14 | 188,89 | 278  | 12410  | 24,1   | 100,0,100.0 |
| chr22 | 18905833 | 18905953 | PRODH | NM_016335 | 15 | 14 | 12    | 176    | 7    | 182    | 1,5    | 68,8        |
| chr22 | 18907074 | 18907422 | PRODH | NM_016335 | 15 | 14 | 11,10 | 147,93 | 213  | 9653   | 27,66  | 25,2,100.0  |
| chr22 | 18908837 | 18909040 | PRODH | NM_016335 | 15 | 14 | 9     | 82     | 22   | 802    | 3,93   | 100         |
| chr22 | 18909893 | 18910013 | PRODH | NM_016335 | 15 | 14 | 8     | 80     | 1314 | 51447  | 425,18 | 31,2        |
| chr22 | 18910351 | 18910862 | PRODH | NM_016335 | 15 | 14 | 7,6   | 117,65 | 431  | 20428  | 39,9   | 82,1,100.0  |
| chr22 | 18912538 | 18912738 | PRODH | NM_016335 | 15 | 14 | 5     | 150    | 238  | 10433  | 51,91  | 100         |
| chr22 | 18913120 | 18913314 | PRODH | NM_016335 | 15 | 14 | 4     | 35     | 83   | 3310   | 16,97  | 100         |
| chr22 | 18918581 | 18918751 | PRODH | NM_016335 | 15 | 14 | 3     | 209    | 509  | 19567  | 114,43 | 62,7        |
| chr22 | 18923480 | 18923843 | PRODH | NM_016335 | 15 | 14 | 2     | 273    | 1    | 25     | 0,07   | 100         |

|       |          |          |         |           |    |    |     |        |      |        |        |            |
|-------|----------|----------|---------|-----------|----|----|-----|--------|------|--------|--------|------------|
| chr22 | 21213333 | 21213708 | SNAP29  | NM_004782 | 5  | 5  | 1   | 237    | 189  | 8544   | 22,72  | 100        |
| chr22 | 21224655 | 21224861 | SNAP29  | NM_004782 | 5  | 5  | 2   | 197    | 1080 | 42834  | 206,93 | 84,8       |
| chr22 | 21235204 | 21235431 | SNAP29  | NM_004782 | 5  | 5  | 3   | 86     | 311  | 12929  | 56,71  | 100        |
| chr22 | 21237638 | 21237835 | SNAP29  | NM_004782 | 5  | 5  | 4   | 99     | 1652 | 69579  | 351,41 | 77,8       |
| chr22 | 21241929 | 21242188 | SNAP29  | NM_004782 | 5  | 5  | 5   | 158    | 966  | 42396  | 163,06 | 100        |
| chr22 | 24129203 | 24129474 | SMARCB1 | NM_003073 | 9  | 9  | 1   | 93     | 39   | 1667   | 6,13   | 100        |
| chr22 | 24133959 | 24134168 | SMARCB1 | NM_003073 | 9  | 9  | 2   | 139    | 255  | 11207  | 53,37  | 88,5       |
| chr22 | 24135716 | 24135901 | SMARCB1 | NM_003073 | 9  | 9  | 3   | 130    | 741  | 33270  | 178,87 | 100        |
| chr22 | 24143061 | 24143522 | SMARCB1 | NM_003073 | 9  | 9  | 4   | 138    | 4575 | 220651 | 477,6  | 100        |
| chr22 | 24145397 | 24145576 | SMARCB1 | NM_003073 | 9  | 9  | 5   | 128    | 462  | 20126  | 111,81 | 74,2       |
| chr22 | 24158894 | 24159067 | SMARCB1 | NM_003073 | 9  | 9  | 6   | 167    | 970  | 41461  | 238,28 | 66,5       |
| chr22 | 24167376 | 24167561 | SMARCB1 | NM_003073 | 9  | 9  | 7   | 191    | 685  | 28605  | 153,79 | 78,5       |
| chr22 | 24175688 | 24175894 | SMARCB1 | NM_003073 | 9  | 9  | 8   | 132    | 616  | 27801  | 134,3  | 100        |
| chr22 | 24176359 | 24176784 | SMARCB1 | NM_003073 | 9  | 9  | 9   | 40     | 195  | 8424   | 19,77  | 22,5       |
| chr22 | 24891237 | 24891523 | UPB1    | NM_016327 | 10 | 10 | 1   | 104    | 161  | 6199   | 21,6   | 100        |
| chr22 | 24895985 | 24896188 | UPB1    | NM_016327 | 10 | 10 | 2   | 172    | 761  | 32319  | 158,43 | 66,3       |
| chr22 | 24898030 | 24898627 | UPB1    | NM_016327 | 10 | 10 | 3   | 88     | 4062 | 198905 | 332,62 | 100        |
| chr22 | 24906645 | 24906827 | UPB1    | NM_016327 | 10 | 10 | 4   | 95     | 528  | 22661  | 123,83 | 100        |
| chr22 | 24909212 | 24909397 | UPB1    | NM_016327 | 10 | 10 | 5   | 162    | 440  | 19079  | 102,58 | 65,4       |
| chr22 | 24911081 | 24911281 | UPB1    | NM_016327 | 10 | 10 | 6   | 170    | 309  | 13342  | 66,38  | 66,5       |
| chr22 | 24916280 | 24916450 | UPB1    | NM_016327 | 10 | 10 | 7   | 82     | 339  | 14863  | 86,92  | 100        |
| chr22 | 24917829 | 24918014 | UPB1    | NM_016327 | 10 | 10 | 8   | 43     | 486  | 19406  | 104,33 | 100        |
| chr22 | 24919506 | 24919691 | UPB1    | NM_016327 | 10 | 10 | 9   | 155    | 488  | 21017  | 112,99 | 67,7       |
| chr22 | 24921618 | 24921901 | UPB1    | NM_016327 | 10 | 10 | 10  | 84     | 598  | 27612  | 97,23  | 100        |
| chr22 | 33670375 | 33670554 | LARGE   | NM_133642 | 15 | 14 | 15  | 198    | 748  | 31619  | 175,66 | 71,7       |
| chr22 | 33672980 | 33673168 | LARGE   | NM_133642 | 15 | 14 | 14  | 196    | 2295 | 101160 | 535,24 | 62,8       |
| chr22 | 33679223 | 33679405 | LARGE   | NM_133642 | 15 | 14 | 13  | 147    | 301  | 12853  | 70,23  | 76,2       |
| chr22 | 33700168 | 33700433 | LARGE   | NM_133642 | 15 | 14 | 12  | 279    | 786  | 35159  | 132,18 | 78,5       |
| chr22 | 33712124 | 33712303 | LARGE   | NM_133642 | 15 | 14 | 11  | 164    | 115  | 5075   | 28,19  | 67,7       |
| chr22 | 33733621 | 33733806 | LARGE   | NM_133642 | 15 | 14 | 10  | 156    | 548  | 24035  | 129,22 | 100        |
| chr22 | 33777942 | 33778121 | LARGE   | NM_133642 | 15 | 14 | 9   | 126    | 548  | 22422  | 124,57 | 70,6       |
| chr22 | 33780208 | 33780393 | LARGE   | NM_133642 | 15 | 14 | 8   | 113    | 209  | 9323   | 50,12  | 73,5       |
| chr22 | 33828170 | 33828364 | LARGE   | NM_133642 | 15 | 14 | 7   | 105    | 317  | 13872  | 71,14  | 78,1       |
| chr22 | 33960864 | 33961061 | LARGE   | NM_133642 | 15 | 14 | 6   | 172    | 495  | 21775  | 109,97 | 82,6       |
| chr22 | 34000415 | 34000624 | LARGE   | NM_133642 | 15 | 14 | 5   | 124    | 207  | 9542   | 45,44  | 100        |
| chr22 | 34022099 | 34022323 | LARGE   | NM_133642 | 15 | 14 | 4   | 83     | 972  | 43340  | 192,62 | 100        |
| chr22 | 34046374 | 34046740 | LARGE   | NM_133642 | 15 | 14 | 3   | 302    | 423  | 16738  | 45,61  | 93         |
| chr22 | 34157275 | 34157490 | LARGE   | NM_133642 | 15 | 14 | 2   | 106    | 359  | 15359  | 71,11  | 100        |
| chr22 | 36960262 | 36960945 | CACNG2  | NM_006078 | 4  | 4  | 4   | 536    | 452  | 20448  | 29,89  | 100        |
| chr22 | 36962381 | 36962554 | CACNG2  | NM_006078 | 4  | 4  | 3   | 141    | 199  | 8470   | 48,68  | 100        |
| chr22 | 36983468 | 36983638 | CACNG2  | NM_006078 | 4  | 4  | 2   | 84     | 293  | 12685  | 74,18  | 100        |
| chr22 | 37098316 | 37098700 | CACNG2  | NM_006078 | 4  | 4  | 1   | 211    | 1268 | 60684  | 157,62 | 100        |
| chr22 | 38369426 | 38370156 | SOX10   | NM_006941 | 4  | 3  | 4   | 704    | 989  | 45150  | 61,76  | 93         |
| chr22 | 38373918 | 38374192 | SOX10   | NM_006941 | 4  | 3  | 3   | 269    | 68   | 2837   | 10,32  | 83,6       |
| chr22 | 38379429 | 38379869 | SOX10   | NM_006941 | 4  | 3  | 2   | 428    | 115  | 5219   | 11,83  | 84,8       |
| chr22 | 40742556 | 40742726 | ADSL    | NM_000026 | 13 | 13 | 1   | 153    | 70   | 3289   | 19,23  | 100        |
| chr22 | 40745792 | 40745968 | ADSL    | NM_000026 | 13 | 13 | 2   | 204    | 77   | 3349   | 18,92  | 65,2       |
| chr22 | 40748953 | 40749171 | ADSL    | NM_000026 | 13 | 13 | 3   | 45     | 229  | 9207   | 42,04  | 100        |
| chr22 | 40750176 | 40750400 | ADSL    | NM_000026 | 13 | 13 | 4   | 80     | 411  | 18422  | 81,88  | 100        |
| chr22 | 40754793 | 40754981 | ADSL    | NM_000026 | 13 | 13 | 5   | 172    | 667  | 29188  | 154,43 | 66,3       |
| chr22 | 40755210 | 40755404 | ADSL    | NM_000026 | 13 | 13 | 6   | 47     | 366  | 16093  | 82,53  | 100        |
| chr22 | 40756320 | 40756505 | ADSL    | NM_000026 | 13 | 13 | 7   | 91     | 399  | 17394  | 93,52  | 100        |
| chr22 | 40757326 | 40757742 | ADSL    | NM_000026 | 13 | 13 | 8,9 | 70.148 | 2157 | 100722 | 241,54 | 30,0,100,0 |
| chr22 | 40758881 | 40759069 | ADSL    | NM_000026 | 13 | 13 | 10  | 91     | 359  | 15185  | 80,34  | 93,4       |
| chr22 | 40760164 | 40760349 | ADSL    | NM_000026 | 13 | 13 | 11  | 90     | 360  | 15440  | 83,01  | 77,8       |
| chr22 | 40760808 | 40761011 | ADSL    | NM_000026 | 13 | 13 | 12  | 177    | 714  | 30505  | 149,53 | 72,3       |
| chr22 | 40762401 | 40762675 | ADSL    | NM_000026 | 13 | 13 | 13  | 87     | 260  | 11978  | 43,56  | 100        |

|       |          |          |        |              |    |    |       |         |      |        |        |            |
|-------|----------|----------|--------|--------------|----|----|-------|---------|------|--------|--------|------------|
| chr22 | 41488901 | 41489181 | EP300  | NM_001429    | 31 | 31 | 1     | 94      | 173  | 7788   | 27,72  | 100        |
| chr22 | 41513110 | 41513772 | EP300  | NM_001429    | 31 | 31 | 2     | 635     | 1929 | 91466  | 137,96 | 91,7       |
| chr22 | 41521828 | 41522013 | EP300  | NM_001429    | 31 | 31 | 3     | 177     | 394  | 16705  | 89,81  | 82,5       |
| chr22 | 41523406 | 41523713 | EP300  | NM_001429    | 31 | 31 | 4     | 262     | 679  | 30508  | 99,05  | 85,1       |
| chr22 | 41525859 | 41526065 | EP300  | NM_001429    | 31 | 31 | 5     | 114     | 392  | 16943  | 81,85  | 100        |
| chr22 | 41527326 | 41527591 | EP300  | NM_001429    | 31 | 31 | 6     | 246     | 359  | 16471  | 61,92  | 81,3       |
| chr22 | 41531772 | 41531960 | EP300  | NM_001429    | 31 | 31 | 7     | 94      | 223  | 8615   | 45,58  | 100        |
| chr22 | 41533691 | 41533882 | EP300  | NM_001429    | 31 | 31 | 8     | 138     | 297  | 13012  | 67,77  | 75,4       |
| chr22 | 41536090 | 41536293 | EP300  | NM_001429    | 31 | 31 | 9     | 118     | 802  | 35567  | 174,35 | 100        |
| chr22 | 41537056 | 41537277 | EP300  | NM_001429    | 31 | 31 | 10    | 175     | 364  | 16121  | 72,62  | 97,7       |
| chr22 | 41542654 | 41542845 | EP300  | NM_001429    | 31 | 31 | 11    | 78      | 174  | 8005   | 41,69  | 100        |
| chr22 | 41543780 | 41544010 | EP300  | NM_001429    | 31 | 31 | 12    | 110     | 1596 | 70045  | 303,23 | 100        |
| chr22 | 41545019 | 41545225 | EP300  | NM_001429    | 31 | 31 | 13    | 138     | 118  | 4982   | 24,07  | 100        |
| chr22 | 41545706 | 41546140 | EP300  | NM_001429    | 31 | 31 | 14    | 438     | 2416 | 111675 | 256,72 | 85,8       |
| chr22 | 41547874 | 41548095 | EP300  | NM_001429    | 31 | 31 | 15    | 180     | 492  | 21754  | 97,99  | 79,4       |
| chr22 | 41548130 | 41548321 | EP300  | NM_001429    | 31 | 31 | 16    | 145     | 151  | 5904   | 30,75  | 77,2       |
| chr22 | 41550966 | 41551163 | EP300  | NM_001429    | 31 | 31 | 17    | 119     | 791  | 33434  | 168,86 | 100        |
| chr22 | 41553131 | 41553390 | EP300  | NM_001429    | 31 | 31 | 18    | 240     | 385  | 17472  | 67,2   | 90,8       |
| chr22 | 41554308 | 41554508 | EP300  | NM_001429    | 31 | 31 | 19    | 89      | 1062 | 46902  | 233,34 | 100        |
| chr22 | 41556645 | 41556833 | EP300  | NM_001429    | 31 | 31 | 20    | 81      | 255  | 10483  | 55,47  | 100        |
| chr22 | 41558699 | 41558884 | EP300  | NM_001429    | 31 | 31 | 21    | 57      | 377  | 14311  | 76,94  | 100        |
| chr22 | 41559989 | 41560195 | EP300  | NM_001429    | 31 | 31 | 22    | 78      | 555  | 23730  | 114,64 | 100        |
| chr22 | 41562545 | 41562721 | EP300  | NM_001429    | 31 | 31 | 23    | 68      | 72   | 2426   | 13,71  | 100        |
| chr22 | 41564396 | 41564830 | EP300  | NM_001429    | 31 | 31 | 24,25 | 151.147 | 2336 | 112397 | 258,38 | 100.0,72.1 |
| chr22 | 41565397 | 41565597 | EP300  | NM_001429    | 31 | 31 | 26    | 114     | 132  | 5078   | 25,26  | 79,8       |
| chr22 | 41566368 | 41566571 | EP300  | NM_001429    | 31 | 31 | 27    | 166     | 762  | 33425  | 163,85 | 97,6       |
| chr22 | 41568508 | 41568711 | EP300  | NM_001429    | 31 | 31 | 28    | 165     | 251  | 11247  | 55,13  | 97         |
| chr22 | 41569589 | 41569762 | EP300  | NM_001429    | 31 | 31 | 29    | 162     | 363  | 14890  | 85,57  | 84         |
| chr22 | 41572200 | 41572456 | EP300  | NM_001429    | 31 | 31 | 30    | 282     | 1103 | 50718  | 197,35 | 73         |
| chr22 | 41572761 | 41575032 | EP300  | NM_001429    | 31 | 31 | 31    | 2184    | 8405 | 406390 | 178,87 | 100        |
| chr22 | 41865133 | 41865315 | ACO2   | NM_001098    | 18 | 18 | 1     | 36      | 29   | 1101   | 6,02   | 100        |
| chr22 | 41895770 | 41895955 | ACO2   | NM_001098    | 18 | 18 | 2     | 137     | 727  | 28953  | 155,66 | 70,8       |
| chr22 | 41903855 | 41904111 | ACO2   | NM_001098    | 18 | 18 | 3     | 259     | 187  | 8021   | 31,21  | 76,8       |
| chr22 | 41907900 | 41908079 | ACO2   | NM_001098    | 18 | 18 | 4     | 93      | 70   | 2794   | 15,52  | 78,5       |
| chr22 | 41911434 | 41911628 | ACO2   | NM_001098    | 18 | 18 | 5     | 159     | 40   | 1681   | 8,62   | 66,7       |
| chr22 | 41911897 | 41912094 | ACO2   | NM_001098    | 18 | 18 | 6     | 151     | 393  | 16557  | 83,62  | 16,6       |
| chr22 | 41913557 | 41913751 | ACO2   | NM_001098    | 18 | 18 | 7     | 105     | 300  | 12748  | 65,37  | 75,2       |
| chr22 | 41916279 | 41916399 | ACO2   | NM_001098    | 18 | 18 | 9     | 106     | 90   | 3840   | 31,74  | 1,9        |
| chr22 | 41918887 | 41919072 | ACO2   | NM_001098    | 18 | 18 | 10    | 158     | 347  | 15372  | 82,65  | 66,5       |
| chr22 | 41919220 | 41919402 | ACO2   | NM_001098    | 18 | 18 | 11    | 74      | 192  | 7247   | 39,6   | 85,1       |
| chr22 | 41919864 | 41920046 | ACO2   | NM_001098    | 18 | 18 | 12    | 112     | 174  | 7731   | 42,25  | 73,2       |
| chr22 | 41920882 | 41921073 | ACO2   | NM_001098    | 18 | 18 | 13    | 123     | 996  | 40214  | 209,45 | 74         |
| chr22 | 41921329 | 41921449 | ACO2   | NM_001098    | 18 | 18 | 14    | 156     | 28   | 916    | 7,57   | 15,4       |
| chr22 | 41922202 | 41922568 | ACO2   | NM_001098    | 18 | 18 | 15    | 192     | 698  | 33006  | 89,93  | 100        |
| chr22 | 41923168 | 41923522 | ACO2   | NM_001098    | 18 | 18 | 16    | 133     | 323  | 14671  | 41,33  | 100        |
| chr22 | 41923746 | 41924109 | ACO2   | NM_001098    | 18 | 18 | 17    | 122     | 828  | 39425  | 108,31 | 100        |
| chr22 | 41924534 | 41924719 | ACO2   | NM_001098    | 18 | 18 | 18    | 135     | 420  | 15177  | 81,6   | 62,2       |
| chr22 | 42456233 | 42456415 | NAGA   | NM_000262    | 9  | 9  | 9     | 135     | 499  | 19727  | 107,8  | 98,5       |
| chr22 | 42456911 | 42457093 | NAGA   | NM_000262    | 9  | 9  | 8     | 144     | 422  | 17840  | 97,49  | 100        |
| chr22 | 42458781 | 42458954 | NAGA   | NM_000262    | 9  | 9  | 7     | 198     | 486  | 20914  | 120,2  | 62,6       |
| chr22 | 42461782 | 42461967 | NAGA   | NM_000262    | 9  | 9  | 6     | 162     | 235  | 9981   | 53,66  | 75,3       |
| chr22 | 42462729 | 42462917 | NAGA   | NM_000262    | 9  | 9  | 5     | 95      | 175  | 6851   | 36,25  | 84,2       |
| chr22 | 42463156 | 42463362 | NAGA   | NM_000262    | 9  | 9  | 4     | 178     | 486  | 21027  | 101,58 | 78,1       |
| chr22 | 42463766 | 42463948 | NAGA   | NM_000262    | 9  | 9  | 3     | 172     | 1202 | 50007  | 273,26 | 100        |
| chr22 | 42464356 | 42464550 | NAGA   | NM_000262    | 9  | 9  | 2     | 136     | 356  | 14614  | 74,94  | 79,4       |
| chr22 | 42466198 | 42466472 | NAGA   | NM_000262    | 9  | 9  | 1     | 16      | 1198 | 54861  | 199,49 | 100        |
| chr22 | 43015700 | 43015900 | CYB5R3 | NM_001171660 | 9  | 9  | 9     | 173     | 49   | 2015   | 10,02  | 70,5       |

|       |          |          |            |              |    |    |           |                  |      |        |        |                              |
|-------|----------|----------|------------|--------------|----|----|-----------|------------------|------|--------|--------|------------------------------|
| chr22 | 43019786 | 43019959 | CYB5R3     | NM_001171660 | 9  | 9  | 8         | 100              | 384  | 17884  | 102,78 | 100                          |
| chr22 | 43023204 | 43023392 | CYB5R3     | NM_001171660 | 9  | 9  | 7         | 86               | 303  | 13019  | 68,88  | 96,5                         |
| chr22 | 43023555 | 43023743 | CYB5R3     | NM_001171660 | 9  | 9  | 6         | 84               | 571  | 24785  | 131,14 | 100                          |
| chr22 | 43024125 | 43024316 | CYB5R3     | NM_001171660 | 9  | 9  | 5         | 130              | 626  | 25780  | 134,27 | 100                          |
| chr22 | 43026852 | 43027037 | CYB5R3     | NM_001171660 | 9  | 9  | 4         | 107              | 231  | 10230  | 55     | 100                          |
| chr22 | 43027274 | 43027486 | CYB5R3     | NM_001171660 | 9  | 9  | 3         | 73               | 56   | 2300   | 10,8   | 100                          |
| chr22 | 43032743 | 43032928 | CYB5R3     | NM_001171660 | 9  | 9  | 2         | 132              | 383  | 17157  | 92,24  | 83,3                         |
| chr22 | 43040400 | 43040591 | CYB5R3     | NM_001171660 | 9  | 9  | 1         | 120              | 1198 | 52102  | 271,36 | 96,7                         |
| chr22 | 50296884 | 50298207 | ALG12      | NM_024105    | 10 | 9  | 10,9,8    | 229,76,170       | 1117 | 50726  | 38,31  | 100,0,100,0,100,0            |
| chr22 | 50301268 | 50301545 | ALG12      | NM_024105    | 10 | 9  | 7         | 224              | 551  | 26238  | 94,38  | 79                           |
| chr22 | 50302903 | 50303109 | ALG12      | NM_024105    | 10 | 9  | 6         | 104              | 493  | 21018  | 101,54 | 89,4                         |
| chr22 | 50303469 | 50303693 | ALG12      | NM_024105    | 10 | 9  | 5         | 195              | 364  | 16134  | 71,71  | 77,9                         |
| chr22 | 50304143 | 50304313 | ALG12      | NM_024105    | 10 | 9  | 4         | 174              | 139  | 5696   | 33,31  | 64,9                         |
| chr22 | 50307045 | 50307512 | ALG12      | NM_024105    | 10 | 9  | 3,2       | 133.162          | 1228 | 55180  | 117,91 | 91,0,100,0                   |
| chr22 | 50961949 | 50963041 | SCO2       | NM_001169111 | 2  | 1  | 2         | 801              | 1661 | 75456  | 69,04  | 100                          |
| chr22 | 51007691 | 51008051 | CHKB-CPT1B | NR_027928    | 30 | 0  | 29,28     | 255,93           | 1001 | 44581  | 123,49 | 62,7,50,5                    |
| chr22 | 51008750 | 51008938 | CHKB-CPT1B | NR_027928    | 30 | 0  | 27        | 114              | 290  | 12370  | 65,45  | 75,4                         |
| chr22 | 51009249 | 51009926 | CHKB-CPT1B | NR_027928    | 30 | 0  | 26,25,24  | 153.130.165      | 1221 | 58227  | 85,88  | 100,0,100,0,74,5             |
| chr22 | 51010456 | 51010828 | CHKB-CPT1B | NR_027928    | 30 | 0  | 23,22     | 117.106          | 768  | 35775  | 95,91  | 82,1,100,0                   |
| chr22 | 51011224 | 51011424 | CHKB-CPT1B | NR_027928    | 30 | 0  | 21        | 186              | 169  | 7402   | 36,83  | 65,1                         |
| chr22 | 51011988 | 51012428 | CHKB-CPT1B | NR_027928    | 30 | 0  | 20        | 196              | 731  | 34539  | 78,32  | 80,1                         |
| chr22 | 51012759 | 51013045 | CHKB-CPT1B | NR_027928    | 30 | 0  | 19,18     | 85.108           | 1838 | 86492  | 301,37 | 100,0,100,0                  |
| chr22 | 51014451 | 51014829 | CHKB-CPT1B | NR_027928    | 30 | 0  | 17,16     | 78.138           | 2095 | 97286  | 256,69 | 100,0,100,0                  |
| chr22 | 51014855 | 51015067 | CHKB-CPT1B | NR_027928    | 30 | 0  | 15        | 102              | 749  | 31250  | 146,71 | 100                          |
| chr22 | 51015226 | 51015414 | CHKB-CPT1B | NR_027928    | 30 | 0  | 14        | 178              | 714  | 31708  | 167,77 | 72,5                         |
| chr22 | 51015722 | 51015910 | CHKB-CPT1B | NR_027928    | 30 | 0  | 13        | 140              | 463  | 20612  | 109,06 | 100                          |
| chr22 | 51016137 | 51016402 | CHKB-CPT1B | NR_027928    | 30 | 0  | 12        | 160              | 227  | 10125  | 38,06  | 100                          |
| chr22 | 51017490 | 51017939 | CHKB-CPT1B | NR_027928    | 30 | 0  | 11,10     | 220,82           | 1193 | 56145  | 124,77 | 88,6,100,0                   |
| chr22 | 51018207 | 51019127 | CHKB-CPT1B | NR_027928    | 30 | 0  | 9,8,7,6,5 | 104,109,82,59,96 | 2443 | 115676 | 125,6  | 51,0,100,0,100,0,100,0,100,0 |
| chr22 | 51019827 | 51020000 | CHKB-CPT1B | NR_027928    | 30 | 0  | 4         | 134              | 653  | 28120  | 161,61 | 100                          |
| chr22 | 51020209 | 51020394 | CHKB-CPT1B | NR_027928    | 30 | 0  | 3         | 114              | 180  | 7470   | 40,16  | 72,8                         |
| chr22 | 51020719 | 51021236 | CHKB-CPT1B | NR_027928    | 30 | 0  | 2,1       | 109.442          | 46   | 2141   | 4,13   | 62,4,56,6                    |
| chrX  | 5810807  | 5811007  | NLGN4X     | NM_020742    | 6  | 5  | 6         | 850              | 606  | 25556  | 127,14 | 17,6                         |
| chrX  | 5821143  | 5821263  | NLGN4X     | NM_020742    | 6  | 5  | 5         | 790              | 225  | 9017   | 74,52  | 15,3                         |
| chrX  | 5821724  | 5821857  | NLGN4X     | NM_020742    | 6  | 5  | 5         | 790              | 161  | 5450   | 40,67  | 17                           |
| chrX  | 5821887  | 5822007  | NLGN4X     | NM_020742    | 6  | 5  | 5         | 790              | 251  | 9098   | 75,19  | 2,7                          |
| chrX  | 5827242  | 5827362  | NLGN4X     | NM_020742    | 6  | 5  | 4         | 186              | 154  | 5839   | 48,26  | 21                           |
| chrX  | 5947365  | 5947568  | NLGN4X     | NM_020742    | 6  | 5  | 3         | 153              | 65   | 2989   | 14,65  | 71,2                         |
| chrX  | 6069111  | 6069622  | NLGN4X     | NM_020742    | 6  | 5  | 2         | 472              | 2512 | 119699 | 233,79 | 84,1                         |
| chrX  | 10417371 | 10417731 | MID1       | NM_001193277 | 10 | 9  | 10        | 349              | 633  | 29056  | 80,49  | 92,8                         |
| chrX  | 10422949 | 10423140 | MID1       | NM_001193277 | 10 | 9  | 9         | 208              | 2133 | 92461  | 481,57 | 81,2                         |
| chrX  | 10427741 | 10427932 | MID1       | NM_001193277 | 10 | 9  | 8         | 162              | 363  | 15233  | 79,34  | 66                           |
| chrX  | 10437491 | 10437866 | MID1       | NM_001193277 | 10 | 9  | 7         | 144              | 770  | 36264  | 96,45  | 90,3                         |
| chrX  | 10442583 | 10443177 | MID1       | NM_001193277 | 10 | 9  | 6         | 128              | 1303 | 59105  | 99,34  | 100                          |
| chrX  | 10450559 | 10450768 | MID1       | NM_001193277 | 10 | 9  | 5         | 149              | 825  | 36542  | 174,01 | 73,8                         |
| chrX  | 10463583 | 10463774 | MID1       | NM_001193277 | 10 | 9  | 4         | 108              | 1255 | 55657  | 289,88 | 100                          |
| chrX  | 10491058 | 10491237 | MID1       | NM_001193277 | 10 | 9  | 3         | 96               | 410  | 17613  | 97,85  | 100                          |
| chrX  | 10534835 | 10535610 | MID1       | NM_001193277 | 10 | 9  | 2         | 660              | 4498 | 217191 | 279,89 | 100                          |
| chrX  | 11130041 | 11130235 | HCCS       | NM_005333    | 7  | 6  | 2         | 100              | 103  | 4476   | 22,95  | 55                           |
| chrX  | 11132858 | 11133058 | HCCS       | NM_005333    | 7  | 6  | 3         | 152              | 324  | 13741  | 68,36  | 68,4                         |
| chrX  | 11135357 | 11135557 | HCCS       | NM_005333    | 7  | 6  | 4         | 149              | 575  | 25168  | 125,21 | 100                          |
| chrX  | 11136610 | 11136804 | HCCS       | NM_005333    | 7  | 6  | 5         | 120              | 299  | 13147  | 67,42  | 100                          |
| chrX  | 11138984 | 11139196 | HCCS       | NM_005333    | 7  | 6  | 6         | 87               | 1135 | 48264  | 226,59 | 100                          |
| chrX  | 11139654 | 11140008 | HCCS       | NM_005333    | 7  | 6  | 7         | 199              | 510  | 22579  | 63,6   | 100                          |
| chrX  | 13753140 | 13753390 | OFD1       | NM_003611    | 23 | 23 | 1,2       | 12,99            | 476  | 21353  | 85,07  | 100,0,24,2                   |
| chrX  | 13754641 | 13754871 | OFD1       | NM_003611    | 23 | 23 | 3         | 201              | 630  | 23345  | 101,06 | 78,1                         |
| chrX  | 13756996 | 13757199 | OFD1       | NM_003611    | 23 | 23 | 4,5       | 69,31            | 85   | 3250   | 15,93  | 55,1,100,0                   |

|      |          |          |       |              |    |    |    |      |       |        |        |      |
|------|----------|----------|-------|--------------|----|----|----|------|-------|--------|--------|------|
| chrX | 13762560 | 13762757 | OFD1  | NM_003611    | 23 | 23 | 6  | 105  | 369   | 16035  | 80,98  | 75,2 |
| chrX | 13764480 | 13764677 | OFD1  | NM_003611    | 23 | 23 | 7  | 137  | 430   | 18236  | 92,1   | 69,3 |
| chrX | 13764930 | 13765100 | OFD1  | NM_003611    | 23 | 23 | 8  | 174  | 186   | 7282   | 42,58  | 82,2 |
| chrX | 13769402 | 13769578 | OFD1  | NM_003611    | 23 | 23 | 10 | 120  | 136   | 5847   | 33,03  | 71,7 |
| chrX | 13771520 | 13771690 | OFD1  | NM_003611    | 23 | 23 | 11 | 74   | 233   | 7796   | 45,59  | 55,4 |
| chrX | 13773331 | 13773451 | OFD1  | NM_003611    | 23 | 23 | 12 | 92   | 62    | 2288   | 18,91  | 33,7 |
| chrX | 13774846 | 13774966 | OFD1  | NM_003611    | 23 | 23 | 13 | 190  | 250   | 8447   | 69,81  | 21,6 |
| chrX | 13775788 | 13775970 | OFD1  | NM_003611    | 23 | 23 | 14 | 131  | 143   | 6087   | 33,26  | 93,1 |
| chrX | 13776363 | 13776536 | OFD1  | NM_003611    | 23 | 23 | 15 | 112  | 238   | 10198  | 58,61  | 72,3 |
| chrX | 13778191 | 13778557 | OFD1  | NM_003611    | 23 | 23 | 16 | 606  | 797   | 36797  | 100,26 | 53,5 |
| chrX | 13778671 | 13778791 | OFD1  | NM_003611    | 23 | 23 | 16 | 606  | 321   | 9447   | 78,07  | 20   |
| chrX | 13779235 | 13779426 | OFD1  | NM_003611    | 23 | 23 | 17 | 127  | 457   | 17932  | 93,4   | 75,6 |
| chrX | 13780487 | 13780657 | OFD1  | NM_003611    | 23 | 23 | 18 | 101  | 131   | 5549   | 32,45  | 76,2 |
| chrX | 13781878 | 13782078 | OFD1  | NM_003611    | 23 | 23 | 19 | 111  | 292   | 12707  | 63,22  | 87,4 |
| chrX | 13785379 | 13785499 | OFD1  | NM_003611    | 23 | 23 | 20 | 158  | 102   | 4344   | 35,9   | 15,8 |
| chrX | 13786232 | 13786405 | OFD1  | NM_003611    | 23 | 23 | 21 | 171  | 239   | 9783   | 56,22  | 65,5 |
| chrX | 13786710 | 13786907 | OFD1  | NM_003611    | 23 | 23 | 22 | 68   | 183   | 7340   | 37,07  | 100  |
| chrX | 15845275 | 15845564 | AP1S2 | NM_003916    | 5  | 4  | 5  | 48   | 784   | 36274  | 125,08 | 100  |
| chrX | 15863545 | 15863745 | AP1S2 | NM_003916    | 5  | 4  | 4  | 138  | 921   | 38608  | 192,08 | 68,8 |
| chrX | 15864054 | 15864227 | AP1S2 | NM_003916    | 5  | 4  | 3  | 109  | 566   | 23958  | 137,69 | 74,3 |
| chrX | 15870532 | 15870732 | AP1S2 | NM_003916    | 5  | 4  | 2  | 179  | 372   | 14140  | 70,35  | 64,8 |
| chrX | 15872836 | 15873027 | AP1S2 | NM_003916    | 5  | 4  | 1  | 327  | 7     | 336    | 1,75   | 58,7 |
| chrX | 17393821 | 17394433 | NHS   | NM_198270    | 8  | 8  | 1  | 565  | 37    | 1527   | 2,49   | 97,9 |
| chrX | 17705769 | 17705951 | NHS   | NM_198270    | 8  | 8  | 2  | 153  | 1297  | 53488  | 292,28 | 58,8 |
| chrX | 17710355 | 17710549 | NHS   | NM_198270    | 8  | 8  | 3  | 134  | 89    | 3859   | 19,79  | 70,9 |
| chrX | 17739619 | 17739807 | NHS   | NM_198270    | 8  | 8  | 4  | 193  | 225   | 10031  | 53,07  | 69,9 |
| chrX | 17742342 | 17742569 | NHS   | NM_198270    | 8  | 8  | 5  | 132  | 316   | 13748  | 60,3   | 100  |
| chrX | 17743529 | 17746514 | NHS   | NM_198270    | 8  | 8  | 6  | 2982 | 12540 | 606970 | 203,27 | 97,9 |
| chrX | 17746686 | 17746859 | NHS   | NM_198270    | 8  | 8  | 7  | 127  | 144   | 6357   | 36,53  | 71,7 |
| chrX | 17749984 | 17750679 | NHS   | NM_198270    | 8  | 8  | 8  | 607  | 2688  | 128698 | 184,91 | 99   |
| chrX | 18525067 | 18525344 | CDKLS | NM_003159    | 21 | 20 | 2  | 64   | 813   | 36836  | 132,5  | 100  |
| chrX | 18528796 | 18528984 | CDKLS | NM_003159    | 21 | 20 | 3  | 35   | 417   | 17896  | 94,69  | 100  |
| chrX | 18582468 | 18582644 | CDKLS | NM_003159    | 21 | 20 | 4  | 46   | 170   | 7950   | 44,92  | 100  |
| chrX | 18593453 | 18593632 | CDKLS | NM_003159    | 21 | 20 | 5  | 137  | 200   | 8533   | 47,41  | 100  |
| chrX | 18597921 | 18598112 | CDKLS | NM_003159    | 21 | 20 | 6  | 121  | 418   | 17568  | 91,5   | 100  |
| chrX | 18599946 | 18600137 | CDKLS | NM_003159    | 21 | 20 | 7  | 60   | 256   | 10581  | 55,11  | 100  |
| chrX | 18602342 | 18602560 | CDKLS | NM_003159    | 21 | 20 | 8  | 91   | 192   | 8466   | 38,66  | 100  |
| chrX | 18606125 | 18606343 | CDKLS | NM_003159    | 21 | 20 | 9  | 190  | 687   | 30212  | 137,95 | 73,2 |
| chrX | 18613332 | 18613541 | CDKLS | NM_003159    | 21 | 20 | 10 | 81   | 340   | 15053  | 71,68  | 91,4 |
| chrX | 18616557 | 18616754 | CDKLS | NM_003159    | 21 | 20 | 11 | 152  | 438   | 18694  | 94,41  | 100  |
| chrX | 18621959 | 18622932 | CDKLS | NM_003159    | 21 | 20 | 12 | 967  | 4777  | 225038 | 231,05 | 94,2 |
| chrX | 18626869 | 18627096 | CDKLS | NM_003159    | 21 | 20 | 13 | 102  | 641   | 28050  | 123,03 | 100  |
| chrX | 18627492 | 18627674 | CDKLS | NM_003159    | 21 | 20 | 14 | 106  | 72    | 3154   | 17,23  | 84,9 |
| chrX | 18631239 | 18631430 | CDKLS | NM_003159    | 21 | 20 | 15 | 124  | 901   | 41460  | 215,94 | 100  |
| chrX | 18637876 | 18638091 | CDKLS | NM_003159    | 21 | 20 | 16 | 100  | 91    | 4044   | 18,72  | 100  |
| chrX | 18643141 | 18643332 | CDKLS | NM_003159    | 21 | 20 | 17 | 120  | 361   | 15890  | 82,76  | 70,8 |
| chrX | 18646425 | 18646696 | CDKLS | NM_003159    | 21 | 20 | 18 | 217  | 374   | 17575  | 64,61  | 94,9 |
| chrX | 18664044 | 18664223 | CDKLS | NM_003159    | 21 | 20 | 19 | 84   | 1386  | 60447  | 335,82 | 100  |
| chrX | 18668517 | 18668723 | CDKLS | NM_003159    | 21 | 20 | 20 | 183  | 848   | 38291  | 184,98 | 100  |
| chrX | 18671621 | 18671794 | CDKLS | NM_003159    | 21 | 20 | 21 | 113  | 482   | 21111  | 121,33 | 38,9 |
| chrX | 19362008 | 19362208 | PDHA1 | NM_001173454 | 12 | 12 | 1  | 57   | 77    | 3284   | 16,34  | 93   |
| chrX | 19364658 | 19364828 | PDHA1 | NM_001173454 | 12 | 12 | 2  | 114  | 304   | 13085  | 76,52  | 73,7 |
| chrX | 19367356 | 19367547 | PDHA1 | NM_001173454 | 12 | 12 | 3  | 60   | 169   | 6827   | 35,56  | 100  |
| chrX | 19368095 | 19368301 | PDHA1 | NM_001173454 | 12 | 12 | 4  | 174  | 491   | 21832  | 105,47 | 77   |
| chrX | 19369427 | 19369603 | PDHA1 | NM_001173454 | 12 | 12 | 5  | 127  | 763   | 34332  | 193,97 | 78   |
| chrX | 19371145 | 19371425 | PDHA1 | NM_001173454 | 12 | 12 | 6  | 92   | 894   | 41549  | 147,86 | 100  |
| chrX | 19372545 | 19372742 | PDHA1 | NM_001173454 | 12 | 12 | 7  | 93   | 673   | 29649  | 149,74 | 100  |

|      |          |          |          |              |    |    |       |        |      |        |        |             |
|------|----------|----------|----------|--------------|----|----|-------|--------|------|--------|--------|-------------|
| chrX | 19373498 | 19373959 | PDHA1    | NM_001173454 | 12 | 12 | 8,9   | 156,72 | 1133 | 52109  | 112,79 | 80.1,100.0  |
| chrX | 19375778 | 19375978 | PDHA1    | NM_001173454 | 12 | 12 | 10    | 68     | 267  | 11866  | 59,03  | 88,2        |
| chrX | 19377047 | 19377244 | PDHA1    | NM_001173454 | 12 | 12 | 11    | 109    | 861  | 36473  | 184,21 | 88,1        |
| chrX | 19377648 | 19377836 | PDHA1    | NM_001173454 | 12 | 12 | 12    | 165    | 291  | 12583  | 66,58  | 75,2        |
| chrX | 20173386 | 20173654 | RPS6KA3  | NM_004586    | 22 | 22 | 22    | 123    | 831  | 36430  | 135,43 | 100         |
| chrX | 20174226 | 20174423 | RPS6KA3  | NM_004586    | 22 | 22 | 21    | 141    | 455  | 20262  | 102,33 | 100         |
| chrX | 20179702 | 20179887 | RPS6KA3  | NM_004586    | 22 | 22 | 20    | 118    | 401  | 16064  | 86,37  | 100         |
| chrX | 20180995 | 20181174 | RPS6KA3  | NM_004586    | 22 | 22 | 19    | 77     | 316  | 13984  | 77,69  | 100         |
| chrX | 20182976 | 20183167 | RPS6KA3  | NM_004586    | 22 | 22 | 18    | 162    | 320  | 14005  | 72,94  | 93,2        |
| chrX | 20185658 | 20185849 | RPS6KA3  | NM_004586    | 22 | 22 | 17    | 159    | 506  | 20699  | 107,81 | 89,9        |
| chrX | 20187477 | 20187689 | RPS6KA3  | NM_004586    | 22 | 22 | 16    | 90     | 169  | 7141   | 33,53  | 100         |
| chrX | 20190862 | 20191041 | RPS6KA3  | NM_004586    | 22 | 22 | 15    | 126    | 387  | 17118  | 95,1   | 100         |
| chrX | 20193258 | 20193440 | RPS6KA3  | NM_004586    | 22 | 22 | 14    | 125    | 502  | 22623  | 123,62 | 100         |
| chrX | 20194351 | 20194637 | RPS6KA3  | NM_004586    | 22 | 22 | 13,12 | 103,65 | 180  | 7712   | 26,87  | 100,0,100.0 |
| chrX | 20194982 | 20195203 | RPS6KA3  | NM_004586    | 22 | 22 | 11    | 89     | 418  | 17582  | 79,2   | 100         |
| chrX | 20204336 | 20204548 | RPS6KA3  | NM_004586    | 22 | 22 | 10    | 71     | 37   | 1655   | 7,77   | 100         |
| chrX | 20205919 | 20206101 | RPS6KA3  | NM_004586    | 22 | 22 | 9     | 143    | 916  | 39456  | 215,61 | 100         |
| chrX | 20206461 | 20206658 | RPS6KA3  | NM_004586    | 22 | 22 | 8     | 88     | 111  | 4277   | 21,6   | 100         |
| chrX | 20211482 | 20211703 | RPS6KA3  | NM_004586    | 22 | 22 | 7     | 107    | 165  | 7377   | 33,23  | 92,5        |
| chrX | 20212225 | 20212422 | RPS6KA3  | NM_004586    | 22 | 22 | 6     | 80     | 187  | 7850   | 39,65  | 100         |
| chrX | 20213104 | 20213280 | RPS6KA3  | NM_004586    | 22 | 22 | 5     | 81     | 595  | 24345  | 137,54 | 100         |
| chrX | 20222050 | 20222238 | RPS6KA3  | NM_004586    | 22 | 22 | 4     | 82     | 227  | 9711   | 51,38  | 100         |
| chrX | 20227384 | 20227587 | RPS6KA3  | NM_004586    | 22 | 22 | 3     | 117    | 216  | 9208   | 45,14  | 100         |
| chrX | 20252860 | 20253066 | RPS6KA3  | NM_004586    | 22 | 22 | 2     | 57     | 121  | 4541   | 21,94  | 100         |
| chrX | 20284633 | 20284803 | RPS6KA3  | NM_004586    | 22 | 22 | 1     | 69     | 0    | 0      | 0      | 100         |
| chrX | 21958952 | 21959546 | SMS      | NM_004595    | 11 | 11 | 1     | 49     | 11   | 462    | 0,78   | 81,6        |
| chrX | 21985410 | 21985530 | SMS      | NM_004595    | 11 | 11 | 2     | 121    | 131  | 4091   | 33,81  | 20,7        |
| chrX | 21990086 | 21990206 | SMS      | NM_004595    | 11 | 11 | 3     | 94     | 33   | 1348   | 11,14  | 24,5        |
| chrX | 21995318 | 21995438 | SMS      | NM_004595    | 11 | 11 | 5     | 176    | 264  | 10325  | 85,33  | 21          |
| chrX | 21996209 | 21996329 | SMS      | NM_004595    | 11 | 11 | 6     | 155    | 524  | 19304  | 159,54 | 15,5        |
| chrX | 21997070 | 21997190 | SMS      | NM_004595    | 11 | 11 | 7     | 90     | 129  | 4893   | 40,44  | 16,7        |
| chrX | 22002512 | 22002632 | SMS      | NM_004595    | 11 | 11 | 8     | 115    | 290  | 11219  | 92,72  | 21,7        |
| chrX | 22003335 | 22003455 | SMS      | NM_004595    | 11 | 11 | 9     | 80     | 51   | 2110   | 17,44  | 8,8         |
| chrX | 22010797 | 22010917 | SMS      | NM_004595    | 11 | 11 | 10    | 116    | 30   | 1087   | 8,98   | 29,3        |
| chrX | 23352933 | 23353349 | PTCHD1   | NM_173495    | 3  | 3  | 1     | 351    | 1680 | 74091  | 177,68 | 100         |
| chrX | 23397678 | 23398468 | PTCHD1   | NM_173495    | 3  | 3  | 2     | 661    | 3234 | 155629 | 196,75 | 100         |
| chrX | 23410672 | 23412392 | PTCHD1   | NM_173495    | 3  | 3  | 3     | 1655   | 9579 | 467613 | 271,71 | 98,5        |
| chrX | 25022693 | 25022976 | ARX      | NM_139058    | 5  | 5  | 5     | 241    | 46   | 1838   | 6,47   | 78,8        |
| chrX | 25025136 | 25025502 | ARX      | NM_139058    | 5  | 5  | 4     | 329    | 323  | 14218  | 38,74  | 83,6        |
| chrX | 25028341 | 25028514 | ARX      | NM_139058    | 5  | 5  | 3     | 46     | 575  | 23754  | 136,52 | 100         |
| chrX | 25030995 | 25031918 | ARX      | NM_139058    | 5  | 5  | 2     | 877    | 244  | 10802  | 11,69  | 100         |
| chrX | 25033595 | 25033875 | ARX      | NM_139058    | 5  | 5  | 1     | 196    | 378  | 16849  | 59,96  | 100         |
| chrX | 28807417 | 28807614 | IL1RAPL1 | NM_014271    | 11 | 10 | 2     | 82     | 422  | 17908  | 90,44  | 100         |
| chrX | 29301003 | 29301259 | IL1RAPL1 | NM_014271    | 11 | 10 | 3     | 280    | 740  | 33761  | 131,37 | 73,2        |
| chrX | 29414337 | 29414534 | IL1RAPL1 | NM_014271    | 11 | 10 | 4     | 187    | 292  | 12917  | 65,24  | 85,6        |
| chrX | 29417251 | 29417442 | IL1RAPL1 | NM_014271    | 11 | 10 | 5     | 154    | 269  | 12443  | 64,81  | 100         |
| chrX | 29686498 | 29686683 | IL1RAPL1 | NM_014271    | 11 | 10 | 6     | 75     | 757  | 32727  | 175,95 | 100         |
| chrX | 29935516 | 29935704 | IL1RAPL1 | NM_014271    | 11 | 10 | 7     | 133    | 100  | 4012   | 21,23  | 93,2        |
| chrX | 29938023 | 29938208 | IL1RAPL1 | NM_014271    | 11 | 10 | 8     | 146    | 354  | 14935  | 80,3   | 97,9        |
| chrX | 29959745 | 29959936 | IL1RAPL1 | NM_014271    | 11 | 10 | 9     | 144    | 131  | 5807   | 30,24  | 100         |
| chrX | 29972608 | 29972790 | IL1RAPL1 | NM_014271    | 11 | 10 | 10    | 171    | 374  | 15187  | 82,99  | 88,9        |
| chrX | 29973145 | 29973991 | IL1RAPL1 | NM_014271    | 11 | 10 | 11    | 719    | 4327 | 208205 | 245,81 | 100         |
| chrX | 30683689 | 30683809 | GK       | NM_001205019 | 21 | 21 | 2     | 74     | 217  | 8064   | 66,64  | 17,6        |
| chrX | 30686233 | 30686353 | GK       | NM_001205019 | 21 | 21 | 3     | 107    | 15   | 531    | 4,39   | 2,8         |
| chrX | 30695534 | 30695654 | GK       | NM_001205019 | 21 | 21 | 4     | 78     | 173  | 7086   | 58,56  | 46,2        |
| chrX | 30712625 | 30712745 | GK       | NM_001205019 | 21 | 21 | 6     | 138    | 242  | 8892   | 73,49  | 21,7        |
| chrX | 30714244 | 30714364 | GK       | NM_001205019 | 21 | 21 | 7     | 110    | 48   | 1630   | 13,47  | 22,7        |

|      |          |          |     |              |    |    |    |     |      |       |        |      |
|------|----------|----------|-----|--------------|----|----|----|-----|------|-------|--------|------|
| chrX | 30714768 | 30714980 | GK  | NM_001205019 | 21 | 21 | 8  | 67  | 29   | 1008  | 4,73   | 49,3 |
| chrX | 30715760 | 30715954 | GK  | NM_001205019 | 21 | 21 | 9  | 18  | 555  | 24447 | 125,37 | 100  |
| chrX | 30718391 | 30718600 | GK  | NM_001205019 | 21 | 21 | 10 | 36  | 278  | 11584 | 55,16  | 100  |
| chrX | 30719022 | 30719142 | GK  | NM_001205019 | 21 | 21 | 11 | 68  | 28   | 957   | 7,91   | 1,5  |
| chrX | 30725668 | 30725868 | GK  | NM_001205019 | 21 | 21 | 12 | 43  | 155  | 5406  | 26,9   | 100  |
| chrX | 30736718 | 30736838 | GK  | NM_001205019 | 21 | 21 | 14 | 79  | 45   | 1370  | 11,32  | 20,3 |
| chrX | 30737614 | 30737734 | GK  | NM_001205019 | 21 | 21 | 15 | 97  | 61   | 2515  | 20,79  | 19,6 |
| chrX | 30738197 | 30738317 | GK  | NM_001205019 | 21 | 21 | 16 | 85  | 86   | 3127  | 25,84  | 18,8 |
| chrX | 30738846 | 30738966 | GK  | NM_001205019 | 21 | 21 | 17 | 121 | 537  | 20251 | 167,36 | 10,7 |
| chrX | 30739036 | 30739212 | GK  | NM_001205019 | 21 | 21 | 18 | 144 | 356  | 12849 | 72,59  | 53,5 |
| chrX | 30745653 | 30745773 | GK  | NM_001205019 | 21 | 21 | 20 | 87  | 250  | 9327  | 77,08  | 19,5 |
| chrX | 31139822 | 31140099 | DMD | NM_004006    | 79 | 79 | 79 | 12  | 467  | 21017 | 75,6   | 100  |
| chrX | 31144673 | 31144855 | DMD | NM_004006    | 79 | 79 | 78 | 32  | 199  | 8990  | 49,13  | 100  |
| chrX | 31152131 | 31152349 | DMD | NM_004006    | 79 | 79 | 77 | 93  | 413  | 17422 | 79,55  | 100  |
| chrX | 31164366 | 31164581 | DMD | NM_004006    | 79 | 79 | 76 | 124 | 124  | 5321  | 24,63  | 100  |
| chrX | 31165331 | 31165638 | DMD | NM_004006    | 79 | 79 | 75 | 244 | 798  | 36514 | 118,55 | 100  |
| chrX | 31187469 | 31187663 | DMD | NM_004006    | 79 | 79 | 74 | 159 | 582  | 22271 | 114,21 | 65,4 |
| chrX | 31190367 | 31190570 | DMD | NM_004006    | 79 | 79 | 73 | 66  | 554  | 23865 | 116,99 | 100  |
| chrX | 31191591 | 31191776 | DMD | NM_004006    | 79 | 79 | 72 | 66  | 330  | 14980 | 80,54  | 100  |
| chrX | 31195952 | 31196170 | DMD | NM_004006    | 79 | 79 | 71 | 39  | 144  | 6472  | 29,55  | 100  |
| chrX | 31196827 | 31197024 | DMD | NM_004006    | 79 | 79 | 70 | 137 | 359  | 15409 | 77,82  | 70,1 |
| chrX | 31198403 | 31198612 | DMD | NM_004006    | 79 | 79 | 69 | 112 | 216  | 8829  | 42,04  | 100  |
| chrX | 31200816 | 31201019 | DMD | NM_004006    | 79 | 79 | 68 | 167 | 513  | 22186 | 108,75 | 98,8 |
| chrX | 31222044 | 31222268 | DMD | NM_004006    | 79 | 79 | 67 | 158 | 187  | 8066  | 35,85  | 100  |
| chrX | 31224671 | 31224865 | DMD | NM_004006    | 79 | 79 | 66 | 86  | 415  | 17176 | 88,08  | 100  |
| chrX | 31227675 | 31227872 | DMD | NM_004006    | 79 | 79 | 65 | 202 | 619  | 28388 | 143,37 | 70,3 |
| chrX | 31241100 | 31241294 | DMD | NM_004006    | 79 | 79 | 64 | 75  | 552  | 24168 | 123,94 | 100  |
| chrX | 31278984 | 31279172 | DMD | NM_004006    | 79 | 79 | 63 | 62  | 599  | 24826 | 131,35 | 100  |
| chrX | 31341677 | 31341877 | DMD | NM_004006    | 79 | 79 | 62 | 61  | 118  | 5360  | 26,67  | 100  |
| chrX | 31366611 | 31366820 | DMD | NM_004006    | 79 | 79 | 61 | 79  | 190  | 7860  | 37,43  | 100  |
| chrX | 31462642 | 31462830 | DMD | NM_004006    | 79 | 79 | 60 | 147 | 969  | 41587 | 220,04 | 70,1 |
| chrX | 31496291 | 31496559 | DMD | NM_004006    | 79 | 79 | 59 | 269 | 555  | 26230 | 97,51  | 74,7 |
| chrX | 31497056 | 31497247 | DMD | NM_004006    | 79 | 79 | 58 | 121 | 312  | 14088 | 73,38  | 100  |
| chrX | 31514831 | 31515010 | DMD | NM_004006    | 79 | 79 | 57 | 157 | 653  | 25475 | 141,53 | 67,5 |
| chrX | 31525398 | 31525619 | DMD | NM_004006    | 79 | 79 | 56 | 173 | 235  | 10207 | 45,98  | 100  |
| chrX | 31645838 | 31646050 | DMD | NM_004006    | 79 | 79 | 55 | 190 | 350  | 15457 | 72,57  | 74,7 |
| chrX | 31676107 | 31676313 | DMD | NM_004006    | 79 | 79 | 54 | 155 | 196  | 7961  | 38,46  | 100  |
| chrX | 31697461 | 31697679 | DMD | NM_004006    | 79 | 79 | 53 | 212 | 681  | 30004 | 137    | 88,7 |
| chrX | 31747733 | 31747933 | DMD | NM_004006    | 79 | 79 | 52 | 118 | 432  | 18950 | 94,28  | 100  |
| chrX | 31792052 | 31792335 | DMD | NM_004006    | 79 | 79 | 51 | 233 | 1296 | 57764 | 203,39 | 100  |
| chrX | 31838042 | 31838248 | DMD | NM_004006    | 79 | 79 | 50 | 109 | 526  | 22358 | 108,01 | 100  |
| chrX | 31854740 | 31854970 | DMD | NM_004006    | 79 | 79 | 49 | 105 | 473  | 19865 | 86     | 100  |
| chrX | 31893297 | 31893497 | DMD | NM_004006    | 79 | 79 | 48 | 183 | 105  | 4554  | 22,66  | 100  |
| chrX | 31947708 | 31947923 | DMD | NM_004006    | 79 | 79 | 47 | 150 | 353  | 14437 | 66,84  | 100  |
| chrX | 31950167 | 31950355 | DMD | NM_004006    | 79 | 79 | 46 | 148 | 350  | 15345 | 81,19  | 100  |
| chrX | 31986500 | 31986703 | DMD | NM_004006    | 79 | 79 | 45 | 176 | 364  | 15789 | 77,4   | 75   |
| chrX | 32235000 | 32235206 | DMD | NM_004006    | 79 | 79 | 44 | 148 | 356  | 14885 | 71,91  | 100  |
| chrX | 32305625 | 32305828 | DMD | NM_004006    | 79 | 79 | 43 | 173 | 416  | 19089 | 93,57  | 100  |
| chrX | 32328162 | 32328365 | DMD | NM_004006    | 79 | 79 | 42 | 195 | 209  | 8158  | 39,99  | 85,6 |
| chrX | 32360150 | 32360332 | DMD | NM_004006    | 79 | 79 | 41 | 183 | 393  | 14513 | 79,31  | 63,4 |
| chrX | 32361229 | 32361429 | DMD | NM_004006    | 79 | 79 | 40 | 153 | 442  | 17567 | 87,4   | 100  |
| chrX | 32364043 | 32364228 | DMD | NM_004006    | 79 | 79 | 39 | 138 | 440  | 17920 | 96,34  | 100  |
| chrX | 32366480 | 32366668 | DMD | NM_004006    | 79 | 79 | 38 | 123 | 670  | 28058 | 148,46 | 100  |
| chrX | 32380961 | 32381146 | DMD | NM_004006    | 79 | 79 | 37 | 171 | 661  | 29042 | 156,14 | 67,3 |
| chrX | 32382668 | 32382865 | DMD | NM_004006    | 79 | 79 | 36 | 129 | 285  | 11702 | 59,1   | 100  |
| chrX | 32383075 | 32383251 | DMD | NM_004006    | 79 | 79 | 35 | 180 | 1277 | 57231 | 323,34 | 63,9 |
| chrX | 32398593 | 32398772 | DMD | NM_004006    | 79 | 79 | 34 | 171 | 956  | 40303 | 223,91 | 85,4 |

|      |          |          |         |              |    |    |       |         |      |        |        |             |
|------|----------|----------|---------|--------------|----|----|-------|---------|------|--------|--------|-------------|
| chrX | 32404380 | 32404568 | DMD     | NM_004006    | 79 | 79 | 33    | 156     | 1342 | 55443  | 293,35 | 91          |
| chrX | 32407544 | 32407744 | DMD     | NM_004006    | 79 | 79 | 32    | 174     | 719  | 30593  | 152,2  | 73          |
| chrX | 32408151 | 32408339 | DMD     | NM_004006    | 79 | 79 | 31    | 111     | 696  | 31548  | 166,92 | 100         |
| chrX | 32429821 | 32430353 | DMD     | NM_004006    | 79 | 79 | 30    | 162     | 1245 | 57948  | 108,72 | 100         |
| chrX | 32456329 | 32456529 | DMD     | NM_004006    | 79 | 79 | 29    | 150     | 932  | 41027  | 204,11 | 100         |
| chrX | 32459233 | 32459436 | DMD     | NM_004006    | 79 | 79 | 28    | 135     | 204  | 8858   | 43,42  | 100         |
| chrX | 32466533 | 32466733 | DMD     | NM_004006    | 79 | 79 | 27    | 183     | 592  | 25449  | 126,61 | 88          |
| chrX | 32472805 | 32472996 | DMD     | NM_004006    | 79 | 79 | 26    | 171     | 164  | 7069   | 36,82  | 84,8        |
| chrX | 32481530 | 32481727 | DMD     | NM_004006    | 79 | 79 | 25    | 156     | 372  | 16117  | 81,4   | 100         |
| chrX | 32482689 | 32482904 | DMD     | NM_004006    | 79 | 79 | 24    | 114     | 841  | 36001  | 166,67 | 100         |
| chrX | 32486605 | 32486820 | DMD     | NM_004006    | 79 | 79 | 23    | 213     | 227  | 9881   | 45,75  | 96,7        |
| chrX | 32490238 | 32490465 | DMD     | NM_004006    | 79 | 79 | 22    | 146     | 347  | 15413  | 67,6   | 100         |
| chrX | 32503001 | 32503204 | DMD     | NM_004006    | 79 | 79 | 21    | 181     | 241  | 10312  | 50,55  | 93,4        |
| chrX | 32509362 | 32509669 | DMD     | NM_004006    | 79 | 79 | 20    | 242     | 341  | 15596  | 50,64  | 100         |
| chrX | 32519809 | 32520021 | DMD     | NM_004006    | 79 | 79 | 19    | 88      | 1015 | 44081  | 206,95 | 100         |
| chrX | 32536011 | 32536276 | DMD     | NM_004006    | 79 | 79 | 18    | 124     | 261  | 11931  | 44,85  | 100         |
| chrX | 32563212 | 32563403 | DMD     | NM_004006    | 79 | 79 | 17    | 176     | 236  | 10107  | 52,64  | 72,7        |
| chrX | 32583772 | 32583993 | DMD     | NM_004006    | 79 | 79 | 16    | 180     | 490  | 21309  | 95,99  | 97,2        |
| chrX | 32591645 | 32592023 | DMD     | NM_004006    | 79 | 79 | 15,14 | 108.102 | 2075 | 98113  | 258,87 | 100.0,100.0 |
| chrX | 32613839 | 32614018 | DMD     | NM_004006    | 79 | 79 | 13    | 120     | 530  | 22920  | 127,33 | 100         |
| chrX | 32632322 | 32632537 | DMD     | NM_004006    | 79 | 79 | 12    | 151     | 518  | 19984  | 92,52  | 78,1        |
| chrX | 32662254 | 32662424 | DMD     | NM_004006    | 79 | 79 | 11    | 182     | 750  | 33983  | 198,73 | 94          |
| chrX | 32663071 | 32663280 | DMD     | NM_004006    | 79 | 79 | 10    | 189     | 1214 | 52364  | 249,35 | 100         |
| chrX | 32715890 | 32716090 | DMD     | NM_004006    | 79 | 79 | 9     | 129     | 713  | 31432  | 156,38 | 80,6        |
| chrX | 32717219 | 32717434 | DMD     | NM_004006    | 79 | 79 | 8     | 182     | 598  | 25912  | 119,96 | 100         |
| chrX | 32827562 | 32827777 | DMD     | NM_004006    | 79 | 79 | 7     | 119     | 761  | 31593  | 146,26 | 100         |
| chrX | 32834540 | 32834749 | DMD     | NM_004006    | 79 | 79 | 6     | 173     | 280  | 12716  | 60,55  | 95,4        |
| chrX | 32841366 | 32841557 | DMD     | NM_004006    | 79 | 79 | 5     | 93      | 458  | 20705  | 107,84 | 100         |
| chrX | 32862889 | 32863095 | DMD     | NM_004006    | 79 | 79 | 4     | 78      | 313  | 13866  | 66,99  | 100         |
| chrX | 32867775 | 32867993 | DMD     | NM_004006    | 79 | 79 | 3     | 93      | 168  | 6573   | 30,01  | 100         |
| chrX | 33038123 | 33038311 | DMD     | NM_004006    | 79 | 79 | 2     | 62      | 248  | 11026  | 58,34  | 90,3        |
| chrX | 33229337 | 33229629 | DMD     | NM_004006    | 79 | 79 | 1     | 31      | 811  | 35810  | 122,22 | 100         |
| chrX | 38420681 | 38420952 | TSPAN7  | NM_004615    | 8  | 7  | 1     | 81      | 393  | 15495  | 56,97  | 100         |
| chrX | 38525413 | 38525610 | TSPAN7  | NM_004615    | 8  | 7  | 2     | 189     | 2198 | 100378 | 506,96 | 79,9        |
| chrX | 38530521 | 38530721 | TSPAN7  | NM_004615    | 8  | 7  | 3     | 75      | 269  | 12100  | 60,2   | 100         |
| chrX | 38533362 | 38533562 | TSPAN7  | NM_004615    | 8  | 7  | 4     | 96      | 45   | 1833   | 9,12   | 91,7        |
| chrX | 38534870 | 38535064 | TSPAN7  | NM_004615    | 8  | 7  | 5     | 156     | 148  | 6568   | 33,68  | 67,9        |
| chrX | 38540333 | 38540536 | TSPAN7  | NM_004615    | 8  | 7  | 6     | 84      | 382  | 16339  | 80,09  | 94          |
| chrX | 38546774 | 38546995 | TSPAN7  | NM_004615    | 8  | 7  | 7     | 69      | 480  | 20863  | 93,98  | 100         |
| chrX | 39911267 | 39911701 | BCOR    | NM_001123385 | 15 | 14 | 15    | 292     | 1081 | 51195  | 117,69 | 100         |
| chrX | 39913111 | 39913311 | BCOR    | NM_001123385 | 15 | 14 | 14    | 157     | 343  | 14588  | 72,58  | 100         |
| chrX | 39913522 | 39913707 | BCOR    | NM_001123385 | 15 | 14 | 13    | 78      | 250  | 9508   | 51,12  | 83,3        |
| chrX | 39914578 | 39914751 | BCOR    | NM_001123385 | 15 | 14 | 12    | 146     | 427  | 17512  | 100,64 | 89,7        |
| chrX | 39916444 | 39916650 | BCOR    | NM_001123385 | 15 | 14 | 11    | 167     | 989  | 43599  | 210,62 | 78,4        |
| chrX | 39921438 | 39921706 | BCOR    | NM_001123385 | 15 | 14 | 10    | 255     | 306  | 13545  | 50,35  | 82          |
| chrX | 39921906 | 39922296 | BCOR    | NM_001123385 | 15 | 14 | 9     | 326     | 651  | 31179  | 79,74  | 91,4        |
| chrX | 39922896 | 39923262 | BCOR    | NM_001123385 | 15 | 14 | 8     | 345     | 1751 | 78949  | 215,12 | 89,9        |
| chrX | 39923607 | 39923887 | BCOR    | NM_001123385 | 15 | 14 | 7     | 264     | 353  | 15391  | 54,77  | 93,2        |
| chrX | 39930275 | 39930478 | BCOR    | NM_001123385 | 15 | 14 | 6     | 187     | 383  | 15512  | 76,04  | 73,8        |
| chrX | 39930789 | 39930992 | BCOR    | NM_001123385 | 15 | 14 | 5     | 54      | 361  | 15882  | 77,85  | 100         |
| chrX | 39931550 | 39934414 | BCOR    | NM_001123385 | 15 | 14 | 4     | 2832    | 7587 | 368167 | 128,51 | 99,3        |
| chrX | 39935594 | 39935794 | BCOR    | NM_001123385 | 15 | 14 | 3     | 79      | 529  | 22830  | 113,58 | 100         |
| chrX | 39937127 | 39937315 | BCOR    | NM_001123385 | 15 | 14 | 2     | 86      | 92   | 4218   | 22,32  | 65,1        |
| chrX | 40448133 | 40448327 | ATP6AP2 | NM_005765    | 9  | 9  | 2     | 131     | 153  | 6118   | 31,37  | 68,7        |
| chrX | 40450526 | 40450702 | ATP6AP2 | NM_005765    | 9  | 9  | 3     | 132     | 396  | 15935  | 90,03  | 69,7        |
| chrX | 40456488 | 40456940 | ATP6AP2 | NM_005765    | 9  | 9  | 4,5   | 96.138  | 591  | 27991  | 61,79  | 100.0,100.0 |
| chrX | 40457934 | 40458104 | ATP6AP2 | NM_005765    | 9  | 9  | 6     | 54      | 239  | 10413  | 60,89  | 98,1        |



|      |          |          |         |           |    |    |       |        |      |        |        |            |
|------|----------|----------|---------|-----------|----|----|-------|--------|------|--------|--------|------------|
| chrX | 40458893 | 40459075 | ATP6AP2 | NM_005765 | 9  | 9  | 7     | 150    | 223  | 9383   | 51,27  | 67,3       |
| chrX | 40460048 | 40460233 | ATP6AP2 | NM_005765 | 9  | 9  | 8     | 120    | 59   | 2324   | 12,49  | 71,7       |
| chrX | 40464964 | 40465084 | ATP6AP2 | NM_005765 | 9  | 9  | 9     | 195    | 117  | 4639   | 38,34  | 22,6       |
| chrX | 41379609 | 41379827 | CASK    | NM_003688 | 27 | 27 | 27    | 177    | 125  | 5519   | 25,2   | 87,6       |
| chrX | 41383130 | 41383300 | CASK    | NM_003688 | 27 | 27 | 26    | 84     | 159  | 6705   | 39,21  | 100        |
| chrX | 41390320 | 41390517 | CASK    | NM_003688 | 27 | 27 | 25    | 203    | 387  | 16873  | 85,22  | 70,4       |
| chrX | 41393903 | 41394183 | CASK    | NM_003688 | 27 | 27 | 24,23 | 81,66  | 370  | 15748  | 56,04  | 100,0,57.6 |
| chrX | 41401886 | 41402098 | CASK    | NM_003688 | 27 | 27 | 22    | 116    | 380  | 15492  | 72,73  | 100        |
| chrX | 41412963 | 41413166 | CASK    | NM_003688 | 27 | 27 | 21    | 197    | 553  | 24297  | 119,1  | 99         |
| chrX | 41414752 | 41414928 | CASK    | NM_003688 | 27 | 27 | 20    | 36     | 447  | 17735  | 100,2  | 100        |
| chrX | 41416242 | 41416457 | CASK    | NM_003688 | 27 | 27 | 19    | 69     | 669  | 28680  | 132,78 | 100        |
| chrX | 41418875 | 41419072 | CASK    | NM_003688 | 27 | 27 | 18    | 69     | 130  | 5338   | 26,96  | 59,4       |
| chrX | 41420784 | 41420969 | CASK    | NM_003688 | 27 | 27 | 17    | 86     | 232  | 10248  | 55,1   | 100        |
| chrX | 41428796 | 41428984 | CASK    | NM_003688 | 27 | 27 | 16    | 79     | 73   | 3317   | 17,55  | 81         |
| chrX | 41437556 | 41437759 | CASK    | NM_003688 | 27 | 27 | 15    | 189    | 613  | 26564  | 130,22 | 88,4       |
| chrX | 41446054 | 41446236 | CASK    | NM_003688 | 27 | 27 | 14    | 81     | 121  | 4818   | 26,33  | 95,1       |
| chrX | 41448695 | 41448893 | CASK    | NM_003688 | 27 | 27 | 13    | 78     | 484  | 21563  | 72,12  | 100        |
| chrX | 41469135 | 41469356 | CASK    | NM_003688 | 27 | 27 | 12    | 122    | 288  | 13299  | 59,91  | 100        |
| chrX | 41481778 | 41481963 | CASK    | NM_003688 | 27 | 27 | 11    | 18     | 316  | 12994  | 69,86  | 100        |
| chrX | 41485776 | 41485988 | CASK    | NM_003688 | 27 | 27 | 10    | 100    | 107  | 4687   | 22     | 100        |
| chrX | 41495781 | 41495969 | CASK    | NM_003688 | 27 | 27 | 9     | 84     | 229  | 10662  | 56,41  | 100        |
| chrX | 41519676 | 41519879 | CASK    | NM_003688 | 27 | 27 | 8     | 123    | 295  | 12328  | 60,43  | 100        |
| chrX | 41524532 | 41524747 | CASK    | NM_003688 | 27 | 27 | 7     | 176    | 751  | 33460  | 154,91 | 98,9       |
| chrX | 41530556 | 41530765 | CASK    | NM_003688 | 27 | 27 | 6     | 103    | 226  | 9241   | 44     | 82,5       |
| chrX | 41598617 | 41598847 | CASK    | NM_003688 | 27 | 27 | 5     | 73     | 235  | 9485   | 41,06  | 100        |
| chrX | 41604730 | 41604909 | CASK    | NM_003688 | 27 | 27 | 4     | 78     | 379  | 15119  | 83,99  | 100        |
| chrX | 41646419 | 41646613 | CASK    | NM_003688 | 27 | 27 | 3     | 106    | 456  | 19734  | 101,2  | 100        |
| chrX | 41712278 | 41712499 | CASK    | NM_003688 | 27 | 27 | 2     | 113    | 413  | 17304  | 77,95  | 100        |
| chrX | 41782131 | 41782396 | CASK    | NM_003688 | 27 | 27 | 1     | 59     | 503  | 23656  | 88,93  | 100        |
| chrX | 43515510 | 43515680 | MAOA    | NM_000240 | 15 | 15 | 1     | 73     | 317  | 13672  | 79,95  | 100        |
| chrX | 43542734 | 43542934 | MAOA    | NM_000240 | 15 | 15 | 2     | 95     | 260  | 11420  | 56,82  | 100        |
| chrX | 43552521 | 43552739 | MAOA    | NM_000240 | 15 | 15 | 3     | 138    | 212  | 9301   | 42,47  | 100        |
| chrX | 43571100 | 43571309 | MAOA    | NM_000240 | 15 | 15 | 4     | 105    | 220  | 9217   | 43,89  | 100        |
| chrX | 43571912 | 43572085 | MAOA    | NM_000240 | 15 | 15 | 5     | 92     | 520  | 22164  | 127,38 | 100        |
| chrX | 43587330 | 43587515 | MAOA    | NM_000240 | 15 | 15 | 6     | 142    | 751  | 34412  | 185,01 | 67,6       |
| chrX | 43590447 | 43590674 | MAOA    | NM_000240 | 15 | 15 | 7     | 150    | 458  | 18644  | 81,77  | 100        |
| chrX | 43590914 | 43591135 | MAOA    | NM_000240 | 15 | 15 | 8     | 160    | 394  | 18314  | 82,5   | 100        |
| chrX | 43591908 | 43592135 | MAOA    | NM_000240 | 15 | 15 | 9     | 97     | 129  | 5845   | 25,64  | 100        |
| chrX | 43595346 | 43595537 | MAOA    | NM_000240 | 15 | 15 | 10    | 54     | 222  | 8943   | 46,58  | 100        |
| chrX | 43599901 | 43600074 | MAOA    | NM_000240 | 15 | 15 | 11    | 58     | 296  | 12111  | 69,6   | 100        |
| chrX | 43601220 | 43601408 | MAOA    | NM_000240 | 15 | 15 | 12    | 98     | 529  | 21623  | 114,41 | 76,5       |
| chrX | 43602921 | 43603127 | MAOA    | NM_000240 | 15 | 15 | 13    | 112    | 227  | 9153   | 44,22  | 77,7       |
| chrX | 43603307 | 43603519 | MAOA    | NM_000240 | 15 | 15 | 14    | 63     | 97   | 4081   | 19,16  | 100        |
| chrX | 43603679 | 43603882 | MAOA    | NM_000240 | 15 | 15 | 15    | 147    | 310  | 13894  | 68,11  | 55,8       |
| chrX | 43808912 | 43809216 | NDP     | NM_000266 | 3  | 2  | 3     | 228    | 640  | 27466  | 90,05  | 75,4       |
| chrX | 43817713 | 43817993 | NDP     | NM_000266 | 3  | 2  | 2     | 174    | 66   | 2648   | 9,42   | 100        |
| chrX | 44732794 | 44732976 | KDM6A   | NM_021140 | 29 | 29 | 1     | 161    | 12   | 425    | 2,32   | 100        |
| chrX | 44733083 | 44733259 | KDM6A   | NM_021140 | 29 | 29 | 2     | 64     | 114  | 5158   | 29,14  | 100        |
| chrX | 44820557 | 44820742 | KDM6A   | NM_021140 | 29 | 29 | 3     | 109    | 208  | 8740   | 46,99  | 74,3       |
| chrX | 44833805 | 44834017 | KDM6A   | NM_021140 | 29 | 29 | 4     | 50     | 232  | 9724   | 45,65  | 100        |
| chrX | 44870206 | 44870379 | KDM6A   | NM_021140 | 29 | 29 | 5     | 59     | 292  | 11596  | 66,64  | 100        |
| chrX | 44879889 | 44880068 | KDM6A   | NM_021140 | 29 | 29 | 6     | 121    | 459  | 19930  | 110,72 | 71,9       |
| chrX | 44894168 | 44894365 | KDM6A   | NM_021140 | 29 | 29 | 7     | 55     | 425  | 18641  | 94,15  | 100        |
| chrX | 44896816 | 44897004 | KDM6A   | NM_021140 | 29 | 29 | 8     | 35     | 418  | 16664  | 88,17  | 100        |
| chrX | 44910927 | 44911130 | KDM6A   | NM_021140 | 29 | 29 | 9     | 94     | 53   | 1993   | 9,77   | 100        |
| chrX | 44913111 | 44913293 | KDM6A   | NM_021140 | 29 | 29 | 10    | 127    | 456  | 20140  | 110,05 | 70,9       |
| chrX | 44918295 | 44918797 | KDM6A   | NM_021140 | 29 | 29 | 11,12 | 99,220 | 2547 | 123409 | 245,35 | 55,6,100.0 |

|      |          |          |        |              |    |    |          |              |      |        |        |                        |
|------|----------|----------|--------|--------------|----|----|----------|--------------|------|--------|--------|------------------------|
| chrX | 44919388 | 44919508 | KDM6A  | NM_021140    | 29 | 29 | 13       | 135          | 134  | 5248   | 43,37  | 10,4                   |
| chrX | 44920531 | 44920704 | KDM6A  | NM_021140    | 29 | 29 | 14       | 96           | 172  | 7111   | 40,87  | 100                    |
| chrX | 44921791 | 44921997 | KDM6A  | NM_021140    | 29 | 29 | 15       | 102          | 68   | 3027   | 14,62  | 100                    |
| chrX | 44922584 | 44923015 | KDM6A  | NM_021140    | 29 | 29 | 16       | 396          | 1943 | 91471  | 211,74 | 88,1                   |
| chrX | 44928777 | 44929638 | KDM6A  | NM_021140    | 29 | 29 | 17       | 779          | 4217 | 202452 | 234,86 | 100                    |
| chrX | 44935831 | 44936031 | KDM6A  | NM_021140    | 29 | 29 | 18       | 130          | 298  | 10608  | 52,78  | 69,2                   |
| chrX | 44937672 | 44937842 | KDM6A  | NM_021140    | 29 | 29 | 19       | 106          | 371  | 15838  | 92,62  | 74,5                   |
| chrX | 44938468 | 44938668 | KDM6A  | NM_021140    | 29 | 29 | 20       | 206          | 200  | 8996   | 44,76  | 62,6                   |
| chrX | 44941899 | 44942087 | KDM6A  | NM_021140    | 29 | 29 | 22       | 75           | 405  | 17105  | 90,5   | 100                    |
| chrX | 44942711 | 44942896 | KDM6A  | NM_021140    | 29 | 29 | 23       | 149          | 389  | 15721  | 84,52  | 96                     |
| chrX | 44945018 | 44945191 | KDM6A  | NM_021140    | 29 | 29 | 24       | 115          | 226  | 9392   | 53,98  | 71,3                   |
| chrX | 44949056 | 44949256 | KDM6A  | NM_021140    | 29 | 29 | 25       | 188          | 117  | 4799   | 23,88  | 63,8                   |
| chrX | 44949992 | 44950198 | KDM6A  | NM_021140    | 29 | 29 | 26       | 142          | 287  | 12502  | 60,4   | 83,1                   |
| chrX | 44966584 | 44966796 | KDM6A  | NM_021140    | 29 | 29 | 27       | 127          | 465  | 21496  | 100,92 | 100                    |
| chrX | 44969383 | 44969568 | KDM6A  | NM_021140    | 29 | 29 | 28       | 171          | 371  | 16164  | 86,9   | 65,5                   |
| chrX | 44970612 | 44970803 | KDM6A  | NM_021140    | 29 | 29 | 29       | 30           | 1324 | 56182  | 292,61 | 100                    |
| chrX | 46309743 | 46309928 | KRBOX4 | NM_001129898 | 6  | 4  | 3        | 15           | 942  | 38092  | 204,8  | 100                    |
| chrX | 46322070 | 46322190 | KRBOX4 | NM_001129898 | 6  | 4  | 4        | 127          | 791  | 28564  | 236,07 | 6,3                    |
| chrX | 46322542 | 46322662 | KRBOX4 | NM_001129898 | 6  | 4  | 5        | 111          | 839  | 30475  | 251,86 | 27                     |
| chrX | 46322723 | 46322843 | KRBOX4 | NM_001129898 | 6  | 4  | 5        | 111          | 185  | 6305   | 52,11  | 18,9                   |
| chrX | 46332173 | 46332503 | KRBOX4 | NM_001129898 | 6  | 4  | 6        | 263          | 305  | 14487  | 43,77  | 100                    |
| chrX | 46359233 | 46360150 | ZNF674 | NM_001039891 | 6  | 4  | 6        | 1493         | 2007 | 95082  | 103,58 | 58,5                   |
| chrX | 46360460 | 46360710 | ZNF674 | NM_001039891 | 6  | 4  | 6        | 1493         | 456  | 18641  | 74,27  | 16,8                   |
| chrX | 46387796 | 46387969 | ZNF674 | NM_001039891 | 6  | 4  | 5        | 111          | 730  | 30032  | 172,6  | 76,6                   |
| chrX | 46388335 | 46388455 | ZNF674 | NM_001039891 | 6  | 4  | 4        | 127          | 895  | 28553  | 235,98 | 7,9                    |
| chrX | 46401450 | 46401653 | ZNF674 | NM_001039891 | 6  | 4  | 3        | 15           | 250  | 9873   | 48,4   | 100                    |
| chrX | 47306741 | 47307711 | ZNF41  | NM_007130    | 5  | 4  | 5        | 2045         | 3118 | 147257 | 151,65 | 43,2                   |
| chrX | 47307763 | 47308926 | ZNF41  | NM_007130    | 5  | 4  | 5        | 2045         | 2058 | 98714  | 84,81  | 54,3                   |
| chrX | 47315321 | 47315515 | ZNF41  | NM_007130    | 5  | 4  | 4        | 96           | 741  | 31467  | 161,37 | 99,9                   |
| chrX | 47315712 | 47315918 | ZNF41  | NM_007130    | 5  | 4  | 3        | 127          | 573  | 25759  | 124,44 | 67,7                   |
| chrX | 47326765 | 47326980 | ZNF41  | NM_007130    | 5  | 4  | 2        | 72           | 302  | 13168  | 60,96  | 100                    |
| chrX | 47432187 | 47432479 | SYN1   | NM_006950    | 13 | 13 | 13       | 136          | 145  | 6699   | 22,86  | 100                    |
| chrX | 47433464 | 47434242 | SYN1   | NM_006950    | 13 | 13 | 12,11    | 589,88       | 39   | 1704   | 2,19   | 89.3,100.0             |
| chrX | 47434571 | 47434744 | SYN1   | NM_006950    | 13 | 13 | 10       | 147          | 183  | 7471   | 42,94  | 70,1                   |
| chrX | 47435524 | 47436038 | SYN1   | NM_006950    | 13 | 13 | 9,8,7    | 103,75,143   | 3297 | 153230 | 297,53 | 100.0,100.0,99.3       |
| chrX | 47436708 | 47436893 | SYN1   | NM_006950    | 13 | 13 | 6        | 63           | 1030 | 44664  | 240,13 | 88,9                   |
| chrX | 47464312 | 47464731 | SYN1   | NM_006950    | 13 | 13 | 5,4      | 90.157       | 1195 | 56466  | 134,44 | 100.0,70.1             |
| chrX | 47466375 | 47466670 | SYN1   | NM_006950    | 13 | 13 | 3,2      | 92,58        | 572  | 25874  | 87,41  | 66.3,100.0             |
| chrX | 47478809 | 47479237 | SYN1   | NM_006950    | 13 | 13 | 1        | 377          | 23   | 1077   | 2,51   | 84,6                   |
| chrX | 47747387 | 47747611 | ZNF81  | NM_007137    | 5  | 4  | 3        | 127          | 200  | 8099   | 36     | 100                    |
| chrX | 47755267 | 47755452 | ZNF81  | NM_007137    | 5  | 4  | 4        | 96           | 289  | 11515  | 61,91  | 76                     |
| chrX | 47774305 | 47776090 | ZNF81  | NM_007137    | 5  | 4  | 5        | 1709         | 2880 | 138438 | 77,51  | 100                    |
| chrX | 48336317 | 48336535 | FTSJ1  | NM_012280    | 13 | 11 | 2        | 121          | 486  | 21447  | 97,93  | 82,6                   |
| chrX | 48336885 | 48337174 | FTSJ1  | NM_012280    | 13 | 11 | 3,4      | 70,91        | 251  | 10474  | 36,12  | 31.4,100.0             |
| chrX | 48337403 | 48337603 | FTSJ1  | NM_012280    | 13 | 11 | 5        | 79           | 585  | 24529  | 122,03 | 100                    |
| chrX | 48339451 | 48340066 | FTSJ1  | NM_012280    | 13 | 11 | 6,7,8,9  | 53,54,103,84 | 1526 | 70509  | 114,46 | 100.0,100.0,100.0,56.0 |
| chrX | 48340824 | 48341486 | FTSJ1  | NM_012280    | 13 | 11 | 10,11,12 | 104,198,33   | 1037 | 48694  | 73,44  | 68.3,100.0,100.0       |
| chrX | 48367859 | 48368352 | PORCN  | NM_203475    | 14 | 14 | 1        | 136          | 2128 | 98951  | 200,31 | 100                    |
| chrX | 48369723 | 48369920 | PORCN  | NM_203475    | 14 | 14 | 2        | 193          | 1286 | 56801  | 286,87 | 79,3                   |
| chrX | 48370141 | 48370344 | PORCN  | NM_203475    | 14 | 14 | 3        | 44           | 474  | 20386  | 99,93  | 100                    |
| chrX | 48370779 | 48371287 | PORCN  | NM_203475    | 14 | 14 | 4,5,6    | 182,131,18   | 1213 | 55866  | 109,76 | 64.3,100.0,100.0       |
| chrX | 48372572 | 48373083 | PORCN  | NM_203475    | 14 | 14 | 8,9      | 126.101      | 1252 | 58190  | 113,65 | 100.0,100.0            |
| chrX | 48374171 | 48374608 | PORCN  | NM_203475    | 14 | 14 | 10,11,12 | 77,64,86     | 1431 | 65995  | 150,67 | 14.3,100.0,100.0       |
| chrX | 48375531 | 48375710 | PORCN  | NM_203475    | 14 | 14 | 13       | 111          | 371  | 15002  | 83,34  | 100                    |
| chrX | 48378815 | 48378935 | PORCN  | NM_203475    | 14 | 14 | 14       | 102          | 26   | 809    | 6,69   | 49                     |
| chrX | 48755020 | 48755223 | PQBP1  | NM_001032381 | 7  | 6  | 1        | 103          | 448  | 18899  | 92,64  | 28,2                   |
| chrX | 48755575 | 48755846 | PQBP1  | NM_001032381 | 7  | 6  | 2        | 67           | 1303 | 61372  | 225,63 | 80,6                   |

|      |          |          |         |              |    |    |          |             |      |        |        |                  |
|------|----------|----------|---------|--------------|----|----|----------|-------------|------|--------|--------|------------------|
| chrX | 48758359 | 48758550 | PQBP1   | NM_001032381 | 7  | 6  | 3        | 112         | 329  | 14242  | 74,18  | 75               |
| chrX | 48759207 | 48759398 | PQBP1   | NM_001032381 | 7  | 6  | 4        | 113         | 366  | 15849  | 82,55  | 100              |
| chrX | 48759577 | 48760429 | PQBP1   | NM_001032381 | 7  | 6  | 5,6,7    | 285,64,157  | 2771 | 135221 | 158,52 | 76.5,100.0,100.0 |
| chrX | 49047841 | 49048284 | SYP     | NM_003179    | 7  | 6  | 6        | 327         | 349  | 13389  | 30,16  | 100              |
| chrX | 49049733 | 49049924 | SYP     | NM_003179    | 7  | 6  | 5        | 192         | 424  | 17410  | 90,68  | 97,9             |
| chrX | 49050632 | 49050814 | SYP     | NM_003179    | 7  | 6  | 4        | 196         | 478  | 20254  | 110,68 | 93,4             |
| chrX | 49054105 | 49054376 | SYP     | NM_003179    | 7  | 6  | 3        | 125         | 355  | 15470  | 56,88  | 100              |
| chrX | 49055419 | 49055619 | SYP     | NM_003179    | 7  | 6  | 2        | 66          | 201  | 8992   | 44,74  | 100              |
| chrX | 49056532 | 49056726 | SYP     | NM_003179    | 7  | 6  | 1        | 36          | 11   | 446    | 2,29   | 100              |
| chrX | 50339586 | 50339964 | SHROOM4 | NM_020717    | 9  | 9  | 9        | 270         | 1154 | 53258  | 140,52 | 100              |
| chrX | 50341320 | 50341615 | SHROOM4 | NM_020717    | 9  | 9  | 8        | 270         | 766  | 35382  | 119,53 | 80               |
| chrX | 50345553 | 50345753 | SHROOM4 | NM_020717    | 9  | 9  | 7        | 181         | 518  | 23571  | 117,27 | 66,9             |
| chrX | 50350302 | 50350659 | SHROOM4 | NM_020717    | 9  | 9  | 6        | 804         | 953  | 44677  | 124,8  | 34,7             |
| chrX | 50350717 | 50351142 | SHROOM4 | NM_020717    | 9  | 9  | 6        | 804         | 667  | 29007  | 68,09  | 53               |
| chrX | 50370589 | 50370759 | SHROOM4 | NM_020717    | 9  | 9  | 5        | 62          | 233  | 10386  | 60,74  | 100              |
| chrX | 50376090 | 50378622 | SHROOM4 | NM_020717    | 9  | 9  | 4        | 2491        | 8321 | 402999 | 159,1  | 98,2             |
| chrX | 50381065 | 50381280 | SHROOM4 | NM_020717    | 9  | 9  | 3        | 135         | 183  | 8018   | 37,12  | 79,3             |
| chrX | 50438689 | 50438901 | SHROOM4 | NM_020717    | 9  | 9  | 2        | 152         | 883  | 38732  | 181,84 | 76,3             |
| chrX | 50556898 | 50557098 | SHROOM4 | NM_020717    | 9  | 9  | 1        | 117         | 64   | 2048   | 10,19  | 100              |
| chrX | 53221807 | 53223032 | KDM5C   | NM_004187    | 26 | 26 | 26,25,24 | 366,200,79  | 2583 | 119373 | 97,37  | 100.0,100.0,98.7 |
| chrX | 53223275 | 53223848 | KDM5C   | NM_004187    | 26 | 26 | 23       | 600         | 687  | 31823  | 55,44  | 88               |
| chrX | 53224131 | 53224648 | KDM5C   | NM_004187    | 26 | 26 | 22,21    | 138.180     | 1067 | 46501  | 89,77  | 87.0,100.0       |
| chrX | 53225135 | 53225320 | KDM5C   | NM_004187    | 26 | 26 | 20       | 139         | 256  | 10201  | 54,84  | 73,4             |
| chrX | 53225794 | 53226163 | KDM5C   | NM_004187    | 26 | 26 | 19       | 359         | 834  | 37538  | 101,45 | 82,5             |
| chrX | 53226980 | 53227180 | KDM5C   | NM_004187    | 26 | 26 | 18       | 106         | 707  | 29234  | 145,44 | 74,5             |
| chrX | 53227602 | 53228270 | KDM5C   | NM_004187    | 26 | 26 | 17,16,15 | 148.125.182 | 1491 | 67428  | 100,79 | 100.0,100.0,61.5 |
| chrX | 53230678 | 53231103 | KDM5C   | NM_004187    | 26 | 26 | 14,13    | 195.120     | 1470 | 67527  | 158,51 | 100.0,56.7       |
| chrX | 53239579 | 53240001 | KDM5C   | NM_004187    | 26 | 26 | 12,11    | 163.182     | 1993 | 92975  | 219,8  | 100.0,79.1       |
| chrX | 53240594 | 53241040 | KDM5C   | NM_004187    | 26 | 26 | 10,9     | 159.120     | 1740 | 78824  | 176,34 | 100.0,60.0       |
| chrX | 53243909 | 53244121 | KDM5C   | NM_004187    | 26 | 26 | 8        | 159         | 136  | 5363   | 25,18  | 76,1             |
| chrX | 53245008 | 53245466 | KDM5C   | NM_004187    | 26 | 26 | 7,6      | 182.124     | 1887 | 88627  | 193,09 | 83.0,100.0       |
| chrX | 53246336 | 53246527 | KDM5C   | NM_004187    | 26 | 26 | 5        | 135         | 717  | 31256  | 162,79 | 91,9             |
| chrX | 53247007 | 53247228 | KDM5C   | NM_004187    | 26 | 26 | 4        | 171         | 179  | 7870   | 35,45  | 83               |
| chrX | 53247352 | 53247561 | KDM5C   | NM_004187    | 26 | 26 | 3        | 123         | 490  | 20911  | 99,58  | 84,6             |
| chrX | 53249884 | 53250084 | KDM5C   | NM_004187    | 26 | 26 | 2        | 78          | 627  | 26345  | 131,07 | 82,1             |
| chrX | 53253969 | 53254166 | KDM5C   | NM_004187    | 26 | 26 | 1        | 150         | 31   | 1411   | 7,13   | 68,7             |
| chrX | 53263285 | 53264359 | IQSEC2  | NM_001111125 | 15 | 15 | 15       | 966         | 1093 | 50150  | 46,65  | 99,3             |
| chrX | 53264853 | 53265053 | IQSEC2  | NM_001111125 | 15 | 15 | 14       | 50          | 180  | 7388   | 36,76  | 100              |
| chrX | 53265547 | 53265747 | IQSEC2  | NM_001111125 | 15 | 15 | 13       | 174         | 220  | 8929   | 44,42  | 75,3             |
| chrX | 53267379 | 53267567 | IQSEC2  | NM_001111125 | 15 | 15 | 12       | 162         | 130  | 6163   | 32,61  | 67,9             |
| chrX | 53268359 | 53268553 | IQSEC2  | NM_001111125 | 15 | 15 | 11       | 100         | 620  | 26810  | 137,49 | 100              |
| chrX | 53270865 | 53271071 | IQSEC2  | NM_001111125 | 15 | 15 | 10       | 126         | 1123 | 51314  | 247,89 | 84,1             |
| chrX | 53272414 | 53272623 | IQSEC2  | NM_001111125 | 15 | 15 | 9        | 140         | 302  | 13230  | 63     | 78,6             |
| chrX | 53276079 | 53276264 | IQSEC2  | NM_001111125 | 15 | 15 | 8        | 167         | 464  | 19803  | 106,47 | 68,3             |
| chrX | 53277316 | 53277528 | IQSEC2  | NM_001111125 | 15 | 15 | 7        | 123         | 384  | 14813  | 69,54  | 83,7             |
| chrX | 53277943 | 53278155 | IQSEC2  | NM_001111125 | 15 | 15 | 6        | 162         | 596  | 24585  | 115,42 | 75,3             |
| chrX | 53279496 | 53280437 | IQSEC2  | NM_001111125 | 15 | 15 | 5        | 896         | 1537 | 71489  | 75,89  | 96,1             |
| chrX | 53283638 | 53284057 | IQSEC2  | NM_001111125 | 15 | 15 | 4        | 402         | 834  | 36807  | 87,64  | 86,1             |
| chrX | 53284942 | 53285219 | IQSEC2  | NM_001111125 | 15 | 15 | 3        | 262         | 198  | 8571   | 30,83  | 90,8             |
| chrX | 53321039 | 53321239 | IQSEC2  | NM_001111125 | 15 | 15 | 2        | 30          | 226  | 9178   | 45,66  | 100              |
| chrX | 53349539 | 53350462 | IQSEC2  | NM_001111125 | 15 | 15 | 1        | 707         | 302  | 13043  | 14,12  | 100              |
| chrX | 53406874 | 53407169 | SMC1A   | NM_006306    | 25 | 25 | 25       | 84          | 231  | 10734  | 36,26  | 100              |
| chrX | 53407537 | 53407734 | SMC1A   | NM_006306    | 25 | 25 | 24       | 111         | 650  | 27913  | 140,97 | 100              |
| chrX | 53407855 | 53408043 | SMC1A   | NM_006306    | 25 | 25 | 23       | 70          | 226  | 10556  | 55,85  | 100              |
| chrX | 53409206 | 53409643 | SMC1A   | NM_006306    | 25 | 25 | 22,21    | 152.155     | 1199 | 56951  | 130,03 | 65.1,100.0       |
| chrX | 53409959 | 53410153 | SMC1A   | NM_006306    | 25 | 25 | 20       | 157         | 471  | 20709  | 106,2  | 86,6             |
| chrX | 53421667 | 53421843 | SMC1A   | NM_006306    | 25 | 25 | 19       | 111         | 153  | 6804   | 38,44  | 100              |

|      |          |          |          |              |    |    |             |                 |      |        |        |                        |
|------|----------|----------|----------|--------------|----|----|-------------|-----------------|------|--------|--------|------------------------|
| chrX | 53423100 | 53423528 | SMC1A    | NM_006306    | 25 | 25 | 18,17       | 154.146         | 3561 | 163636 | 381,44 | 100.0,93.8             |
| chrX | 53426532 | 53426747 | SMC1A    | NM_006306    | 25 | 25 | 16          | 142             | 146  | 6089   | 28,19  | 85,2                   |
| chrX | 53430469 | 53430835 | SMC1A    | NM_006306    | 25 | 25 | 15,14       | 107.117         | 2551 | 116846 | 318,38 | 100.0,100.0            |
| chrX | 53431957 | 53432954 | SMC1A    | NM_006306    | 25 | 25 | 13,12,11,10 | 138.147.180.186 | 2803 | 133893 | 134,16 | 90.6,100.0,100.0,100.0 |
| chrX | 53436014 | 53436460 | SMC1A    | NM_006306    | 25 | 25 | 9,8         | 208.83          | 414  | 17975  | 40,21  | 89.9,100.0             |
| chrX | 53438627 | 53439165 | SMC1A    | NM_006306    | 25 | 25 | 7,6         | 141.259         | 4639 | 222459 | 412,73 | 100.0,85.3             |
| chrX | 53439748 | 53440342 | SMC1A    | NM_006306    | 25 | 25 | 5,4         | 239.204         | 3660 | 170864 | 287,17 | 100.0,78.9             |
| chrX | 53441638 | 53442087 | SMC1A    | NM_006306    | 25 | 25 | 3,2         | 113.189         | 982  | 45833  | 101,85 | 100.0,83.6             |
| chrX | 53449372 | 53449622 | SMC1A    | NM_006306    | 25 | 25 | 1           | 109             | 341  | 14756  | 58,79  | 100                    |
| chrX | 53458321 | 53458607 | HSD17B10 | NM_004493    | 6  | 6  | 6           | 191             | 1005 | 45050  | 156,97 | 100                    |
| chrX | 53458800 | 53459400 | HSD17B10 | NM_004493    | 6  | 6  | 5,4,3       | 109.129.165     | 2699 | 129317 | 215,17 | 50.5,100.0,100.0       |
| chrX | 53460584 | 53460775 | HSD17B10 | NM_004493    | 6  | 6  | 2           | 165             | 219  | 9489   | 49,42  | 64,8                   |
| chrX | 53461155 | 53461346 | HSD17B10 | NM_004493    | 6  | 6  | 1           | 27              | 968  | 41489  | 216,09 | 100                    |
| chrX | 53965443 | 53965649 | PHF8     | NM_001184896 | 22 | 22 | 22          | 89              | 90   | 4122   | 19,91  | 66,3                   |
| chrX | 53966660 | 53967029 | PHF8     | NM_001184896 | 22 | 22 | 21          | 337             | 516  | 23530  | 63,59  | 86,1                   |
| chrX | 53970596 | 53970796 | PHF8     | NM_001184896 | 22 | 22 | 20          | 110             | 1143 | 47437  | 236    | 73,6                   |
| chrX | 53989170 | 53989364 | PHF8     | NM_001184896 | 22 | 22 | 19          | 96              | 405  | 17612  | 90,32  | 91,7                   |
| chrX | 54011248 | 54011608 | PHF8     | NM_001184896 | 22 | 22 | 18          | 314             | 1875 | 87264  | 241,73 | 83,4                   |
| chrX | 54012123 | 54012323 | PHF8     | NM_001184896 | 22 | 22 | 17          | 134             | 430  | 17985  | 89,48  | 56                     |
| chrX | 54013441 | 54013668 | PHF8     | NM_001184896 | 22 | 22 | 16          | 86              | 158  | 7315   | 32,08  | 100                    |
| chrX | 54014244 | 54014447 | PHF8     | NM_001184896 | 22 | 22 | 15          | 179             | 895  | 40880  | 200,39 | 74,9                   |
| chrX | 54019174 | 54019380 | PHF8     | NM_001184896 | 22 | 22 | 14          | 104             | 940  | 40469  | 195,5  | 95,2                   |
| chrX | 54020070 | 54020418 | PHF8     | NM_001184896 | 22 | 22 | 13          | 303             | 1389 | 61923  | 177,43 | 88,1                   |
| chrX | 54022085 | 54022270 | PHF8     | NM_001184896 | 22 | 22 | 12          | 90              | 1704 | 74276  | 399,33 | 100                    |
| chrX | 54026218 | 54026406 | PHF8     | NM_001184896 | 22 | 22 | 11          | 92              | 142  | 5591   | 29,58  | 100                    |
| chrX | 54028615 | 54028788 | PHF8     | NM_001184896 | 22 | 22 | 10          | 107             | 521  | 21690  | 124,66 | 74,8                   |
| chrX | 54028959 | 54029174 | PHF8     | NM_001184896 | 22 | 22 | 9           | 88              | 452  | 19268  | 89,2   | 100                    |
| chrX | 54037610 | 54037789 | PHF8     | NM_001184896 | 22 | 22 | 8           | 163             | 412  | 17941  | 99,67  | 66,3                   |
| chrX | 54040850 | 54041065 | PHF8     | NM_001184896 | 22 | 22 | 7           | 187             | 597  | 26095  | 120,81 | 78,6                   |
| chrX | 54042953 | 54043123 | PHF8     | NM_001184896 | 22 | 22 | 6           | 142             | 656  | 30303  | 177,21 | 67,6                   |
| chrX | 54044007 | 54044207 | PHF8     | NM_001184896 | 22 | 22 | 5           | 161             | 832  | 34746  | 172,87 | 70,8                   |
| chrX | 54048717 | 54048896 | PHF8     | NM_001184896 | 22 | 22 | 4           | 109             | 641  | 27955  | 155,31 | 77,1                   |
| chrX | 54049127 | 54049327 | PHF8     | NM_001184896 | 22 | 22 | 3           | 86              | 274  | 11305  | 56,24  | 100                    |
| chrX | 54068987 | 54069359 | PHF8     | NM_001184896 | 22 | 22 | 2           | 190             | 653  | 28044  | 75,18  | 100                    |
| chrX | 54472432 | 54472819 | FGD1     | NM_004463    | 18 | 18 | 18          | 306             | 295  | 12698  | 32,73  | 90,8                   |
| chrX | 54473682 | 54473876 | FGD1     | NM_004463    | 18 | 18 | 17          | 144             | 379  | 16463  | 84,43  | 92,4                   |
| chrX | 54475134 | 54475678 | FGD1     | NM_004463    | 18 | 18 | 16,15       | 162.126         | 1449 | 65461  | 120,11 | 100.0,81.7             |
| chrX | 54476108 | 54476317 | FGD1     | NM_004463    | 18 | 18 | 14          | 102             | 584  | 21406  | 101,93 | 84,3                   |
| chrX | 54476684 | 54476866 | FGD1     | NM_004463    | 18 | 18 | 13          | 31              | 90   | 3252   | 17,77  | 100                    |
| chrX | 54481856 | 54482240 | FGD1     | NM_004463    | 18 | 18 | 12,11       | 80,93           | 3178 | 149969 | 389,53 | 100.0,100.0            |
| chrX | 54482625 | 54482970 | FGD1     | NM_004463    | 18 | 18 | 10,9        | 147,59          | 1356 | 60931  | 176,1  | 100.0,49.2             |
| chrX | 54491876 | 54492319 | FGD1     | NM_004463    | 18 | 18 | 8,7         | 139.157         | 2000 | 94297  | 212,38 | 100.0,100.0            |
| chrX | 54494175 | 54494351 | FGD1     | NM_004463    | 18 | 18 | 6           | 149             | 232  | 9524   | 53,81  | 90,6                   |
| chrX | 54495236 | 54495427 | FGD1     | NM_004463    | 18 | 18 | 5           | 90              | 2332 | 96030  | 500,16 | 82,2                   |
| chrX | 54496380 | 54497131 | FGD1     | NM_004463    | 18 | 18 | 4,3         | 442.178         | 1685 | 77901  | 103,59 | 100.0,65.2             |
| chrX | 54497793 | 54497993 | FGD1     | NM_004463    | 18 | 18 | 2           | 174             | 188  | 8490   | 42,24  | 73,6                   |
| chrX | 54521507 | 54521935 | FGD1     | NM_004463    | 18 | 18 | 1           | 307             | 51   | 2430   | 5,66   | 100                    |
| chrX | 62857843 | 62858025 | ARHGEF9  | NM_015185    | 10 | 10 | 10          | 182             | 258  | 11069  | 60,49  | 64,8                   |
| chrX | 62863763 | 62863948 | ARHGEF9  | NM_015185    | 10 | 10 | 9           | 69              | 656  | 26382  | 141,84 | 100                    |
| chrX | 62875286 | 62875575 | ARHGEF9  | NM_015185    | 10 | 10 | 8           | 244             | 1651 | 72739  | 250,82 | 82,8                   |
| chrX | 62885695 | 62885889 | ARHGEF9  | NM_015185    | 10 | 10 | 7           | 132             | 338  | 14532  | 74,52  | 93,9                   |
| chrX | 62893945 | 62894154 | ARHGEF9  | NM_015185    | 10 | 10 | 6           | 130             | 592  | 24273  | 115,59 | 79,2                   |
| chrX | 62898240 | 62898526 | ARHGEF9  | NM_015185    | 10 | 10 | 5           | 233             | 682  | 31277  | 108,98 | 91,4                   |
| chrX | 62916949 | 62917164 | ARHGEF9  | NM_015185    | 10 | 10 | 4           | 180             | 106  | 4712   | 21,81  | 88,9                   |
| chrX | 62926082 | 62926261 | ARHGEF9  | NM_015185    | 10 | 10 | 3           | 192             | 410  | 17410  | 96,72  | 64,6                   |
| chrX | 62944467 | 62944670 | ARHGEF9  | NM_015185    | 10 | 10 | 2           | 180             | 1042 | 43545  | 213,46 | 69,4                   |
| chrX | 62974098 | 62974399 | ARHGEF9  | NM_015185    | 10 | 10 | 1           | 9               | 237  | 10460  | 34,64  | 100                    |

|      |          |          |       |           |    |    |          |             |      |        |        |                  |
|------|----------|----------|-------|-----------|----|----|----------|-------------|------|--------|--------|------------------|
| chrX | 67268116 | 67268334 | OPHN1 | NM_002547 | 25 | 23 | 24       | 34          | 210  | 9051   | 41,33  | 100              |
| chrX | 67272234 | 67272431 | OPHN1 | NM_002547 | 25 | 23 | 23       | 51          | 275  | 11874  | 59,97  | 98               |
| chrX | 67273409 | 67273594 | OPHN1 | NM_002547 | 25 | 23 | 22       | 166         | 199  | 8413   | 45,23  | 65,1             |
| chrX | 67283731 | 67284082 | OPHN1 | NM_002547 | 25 | 23 | 21       | 324         | 760  | 36015  | 102,32 | 89,2             |
| chrX | 67292904 | 67293092 | OPHN1 | NM_002547 | 25 | 23 | 20       | 148         | 1133 | 48476  | 256,49 | 66,9             |
| chrX | 67316643 | 67316816 | OPHN1 | NM_002547 | 25 | 23 | 19       | 160         | 166  | 6452   | 37,08  | 65,6             |
| chrX | 67331603 | 67331776 | OPHN1 | NM_002547 | 25 | 23 | 18       | 106         | 307  | 13069  | 75,11  | 76,4             |
| chrX | 67332921 | 67333127 | OPHN1 | NM_002547 | 25 | 23 | 17       | 59          | 678  | 29846  | 144,18 | 100              |
| chrX | 67338968 | 67339171 | OPHN1 | NM_002547 | 25 | 23 | 16       | 85          | 417  | 18075  | 88,6   | 96,5             |
| chrX | 67412730 | 67412939 | OPHN1 | NM_002547 | 25 | 23 | 15       | 75          | 403  | 17892  | 85,2   | 100              |
| chrX | 67413662 | 67413853 | OPHN1 | NM_002547 | 25 | 23 | 14       | 63          | 779  | 34043  | 177,31 | 100              |
| chrX | 67414184 | 67414378 | OPHN1 | NM_002547 | 25 | 23 | 13       | 34          | 234  | 9611   | 49,29  | 100              |
| chrX | 67417038 | 67417241 | OPHN1 | NM_002547 | 25 | 23 | 12       | 79          | 228  | 9801   | 48,04  | 87,3             |
| chrX | 67421451 | 67421636 | OPHN1 | NM_002547 | 25 | 23 | 11       | 92          | 439  | 19096  | 102,67 | 100              |
| chrX | 67426439 | 67426630 | OPHN1 | NM_002547 | 25 | 23 | 10       | 101         | 368  | 16475  | 85,81  | 76,2             |
| chrX | 67429811 | 67430088 | OPHN1 | NM_002547 | 25 | 23 | 9        | 130         | 1170 | 55370  | 199,17 | 72,3             |
| chrX | 67431832 | 67432044 | OPHN1 | NM_002547 | 25 | 23 | 8        | 105         | 163  | 6976   | 32,75  | 90,5             |
| chrX | 67433682 | 67433903 | OPHN1 | NM_002547 | 25 | 23 | 7        | 111         | 576  | 25078  | 112,96 | 100              |
| chrX | 67454300 | 67454515 | OPHN1 | NM_002547 | 25 | 23 | 6        | 102         | 331  | 14459  | 66,94  | 100              |
| chrX | 67494443 | 67494655 | OPHN1 | NM_002547 | 25 | 23 | 5        | 72          | 299  | 12000  | 56,34  | 100              |
| chrX | 67502792 | 67502989 | OPHN1 | NM_002547 | 25 | 23 | 4        | 62          | 1023 | 44595  | 225,23 | 100              |
| chrX | 67518865 | 67519056 | OPHN1 | NM_002547 | 25 | 23 | 3        | 96          | 451  | 19544  | 101,79 | 77,1             |
| chrX | 67652641 | 67652814 | OPHN1 | NM_002547 | 25 | 23 | 2        | 154         | 1373 | 56139  | 322,64 | 68,8             |
| chrX | 69664979 | 69665413 | DLG3  | NM_021120 | 19 | 19 | 1        | 357         | 59   | 2418   | 5,56   | 100              |
| chrX | 69668732 | 69668902 | DLG3  | NM_021120 | 19 | 19 | 2        | 51          | 130  | 5699   | 33,33  | 100              |
| chrX | 69669113 | 69669301 | DLG3  | NM_021120 | 19 | 19 | 3        | 125         | 424  | 18287  | 96,76  | 74,4             |
| chrX | 69669581 | 69669790 | DLG3  | NM_021120 | 19 | 19 | 4        | 170         | 61   | 2472   | 11,77  | 75,9             |
| chrX | 69669980 | 69670189 | DLG3  | NM_021120 | 19 | 19 | 5        | 137         | 637  | 27330  | 130,14 | 100              |
| chrX | 69670385 | 69670600 | DLG3  | NM_021120 | 19 | 19 | 6        | 145         | 437  | 19224  | 89     | 77,2             |
| chrX | 69671651 | 69671821 | DLG3  | NM_021120 | 19 | 19 | 7        | 160         | 878  | 38243  | 223,64 | 65,6             |
| chrX | 69673536 | 69673739 | DLG3  | NM_021120 | 19 | 19 | 8        | 157         | 144  | 5749   | 28,18  | 68,8             |
| chrX | 69674044 | 69674250 | DLG3  | NM_021120 | 19 | 19 | 9        | 103         | 110  | 4490   | 21,69  | 100              |
| chrX | 69698932 | 69699120 | DLG3  | NM_021120 | 19 | 19 | 10       | 115         | 270  | 10797  | 57,13  | 100              |
| chrX | 69712010 | 69712216 | DLG3  | NM_021120 | 19 | 19 | 11       | 177         | 163  | 6752   | 32,62  | 70,1             |
| chrX | 69712263 | 69712448 | DLG3  | NM_021120 | 19 | 19 | 12       | 76          | 116  | 4916   | 26,43  | 100              |
| chrX | 69715135 | 69715356 | DLG3  | NM_021120 | 19 | 19 | 13       | 46          | 170  | 7764   | 34,97  | 100              |
| chrX | 69718273 | 69718449 | DLG3  | NM_021120 | 19 | 19 | 14       | 51          | 303  | 12398  | 70,05  | 100              |
| chrX | 69718994 | 69719206 | DLG3  | NM_021120 | 19 | 19 | 15       | 102         | 910  | 40155  | 188,52 | 100              |
| chrX | 69719694 | 69719867 | DLG3  | NM_021120 | 19 | 19 | 16       | 173         | 337  | 14749  | 84,76  | 81,5             |
| chrX | 69720335 | 69720535 | DLG3  | NM_021120 | 19 | 19 | 17       | 110         | 302  | 13469  | 67,01  | 87,3             |
| chrX | 69720633 | 69720833 | DLG3  | NM_021120 | 19 | 19 | 18       | 92          | 172  | 8000   | 39,8   | 93,5             |
| chrX | 69721980 | 69722266 | DLG3  | NM_021120 | 19 | 19 | 19       | 107         | 934  | 43671  | 152,16 | 100              |
| chrX | 70338596 | 70338784 | MED12 | NM_005120 | 45 | 45 | 1        | 99          | 49   | 2029   | 10,74  | 100              |
| chrX | 70339083 | 70339304 | MED12 | NM_005120 | 45 | 45 | 2        | 105         | 1636 | 72404  | 326,14 | 78,1             |
| chrX | 70339556 | 70340064 | MED12 | NM_005120 | 45 | 45 | 3,4      | 192.157     | 1402 | 66720  | 131,08 | 89,6,100,0       |
| chrX | 70340760 | 70341618 | MED12 | NM_005120 | 45 | 45 | 5,6,7    | 182.111.255 | 3831 | 183956 | 214,15 | 100,0,100,0,81.2 |
| chrX | 70342076 | 70342756 | MED12 | NM_005120 | 45 | 45 | 8,9,10   | 147.100.137 | 2237 | 104604 | 153,6  | 82,3,100,0,100,0 |
| chrX | 70342850 | 70343035 | MED12 | NM_005120 | 45 | 45 | 11       | 132         | 941  | 43313  | 232,87 | 68,9             |
| chrX | 70343337 | 70343531 | MED12 | NM_005120 | 45 | 45 | 12       | 127         | 126  | 5067   | 25,98  | 69,3             |
| chrX | 70343908 | 70344191 | MED12 | NM_005120 | 45 | 45 | 13       | 230         | 1979 | 84508  | 297,56 | 79,6             |
| chrX | 70344581 | 70345033 | MED12 | NM_005120 | 45 | 45 | 14,15    | 81.171      | 1602 | 75998  | 167,77 | 100,0,100,0      |
| chrX | 70345201 | 70345576 | MED12 | NM_005120 | 45 | 45 | 16,17    | 145,51      | 2826 | 135047 | 359,17 | 100,0,100,0      |
| chrX | 70345868 | 70346065 | MED12 | NM_005120 | 45 | 45 | 18       | 119         | 1881 | 77695  | 392,4  | 100              |
| chrX | 70346198 | 70346383 | MED12 | NM_005120 | 45 | 45 | 19       | 144         | 978  | 43001  | 231,19 | 95,1             |
| chrX | 70346752 | 70346925 | MED12 | NM_005120 | 45 | 45 | 20       | 164         | 443  | 18481  | 106,21 | 65,2             |
| chrX | 70347196 | 70347366 | MED12 | NM_005120 | 45 | 45 | 21       | 132         | 1091 | 48747  | 285,07 | 92,4             |
| chrX | 70347795 | 70348629 | MED12 | NM_005120 | 45 | 45 | 22,23,24 | 228.145.121 | 3816 | 182570 | 218,65 | 77,2,100,0,100,0 |

|      |          |          |         |           |    |    |             |                |      |        |        |                         |
|------|----------|----------|---------|-----------|----|----|-------------|----------------|------|--------|--------|-------------------------|
| chrX | 70348869 | 70349241 | MED12   | NM_005120 | 45 | 45 | 25,26       | 102.114        | 2460 | 113069 | 303,13 | 100.0,66.7              |
| chrX | 70349476 | 70349996 | MED12   | NM_005120 | 45 | 45 | 27,28       | 176.180        | 3339 | 159524 | 306,19 | 100.0,62.2              |
| chrX | 70351299 | 70351511 | MED12   | NM_005120 | 45 | 45 | 29          | 72             | 548  | 23098  | 108,44 | 100                     |
| chrX | 70351883 | 70352418 | MED12   | NM_005120 | 45 | 45 | 30,31       | 134.162        | 1288 | 62027  | 115,72 | 100.0,100.0             |
| chrX | 70352698 | 70353058 | MED12   | NM_005120 | 45 | 45 | 32,33       | 112.90         | 697  | 32594  | 90,29  | 97.3,95.6               |
| chrX | 70354086 | 70354298 | MED12   | NM_005120 | 45 | 45 | 34          | 110            | 437  | 19295  | 90,59  | 83,6                    |
| chrX | 70354464 | 70354676 | MED12   | NM_005120 | 45 | 45 | 35          | 136            | 708  | 29888  | 140,32 | 83,8                    |
| chrX | 70354997 | 70355182 | MED12   | NM_005120 | 45 | 45 | 36          | 162            | 675  | 28021  | 150,65 | 66                      |
| chrX | 70356104 | 70356479 | MED12   | NM_005120 | 45 | 45 | 37          | 375            | 241  | 10156  | 27,01  | 93,1                    |
| chrX | 70356720 | 70357803 | MED12   | NM_005120 | 45 | 45 | 38,39,40,41 | 151,197,78,218 | 4233 | 200453 | 184,92 | 100.0,100.0,100.0,100.0 |
| chrX | 70360380 | 70360586 | MED12   | NM_005120 | 45 | 45 | 42          | 223            | 520  | 23876  | 115,34 | 45,7                    |
| chrX | 70361121 | 70361324 | MED12   | NM_005120 | 45 | 45 | 43          | 141            | 79   | 2547   | 12,49  | 70,9                    |
| chrX | 70361637 | 70361858 | MED12   | NM_005120 | 45 | 45 | 44          | 82             | 784  | 35842  | 161,45 | 100                     |
| chrX | 71571580 | 71571759 | HDAC8   | NM_018486 | 11 | 11 | 10          | 106            | 148  | 6423   | 35,68  | 100                     |
| chrX | 71681875 | 71682063 | HDAC8   | NM_018486 | 11 | 11 | 9           | 95             | 259  | 12067  | 63,85  | 77,9                    |
| chrX | 71684374 | 71684660 | HDAC8   | NM_018486 | 11 | 11 | 8           | 173            | 493  | 23297  | 81,17  | 100                     |
| chrX | 71708724 | 71708951 | HDAC8   | NM_018486 | 11 | 11 | 7           | 109            | 342  | 14253  | 62,51  | 100                     |
| chrX | 71710719 | 71710913 | HDAC8   | NM_018486 | 11 | 11 | 6           | 78             | 266  | 11665  | 59,82  | 100                     |
| chrX | 71715018 | 71715206 | HDAC8   | NM_018486 | 11 | 11 | 5           | 113            | 501  | 21332  | 112,87 | 89,4                    |
| chrX | 71787533 | 71787801 | HDAC8   | NM_018486 | 11 | 11 | 4           | 142            | 871  | 37340  | 138,81 | 44,4                    |
| chrX | 71788535 | 71788747 | HDAC8   | NM_018486 | 11 | 11 | 3           | 131            | 453  | 20321  | 95,4   | 100                     |
| chrX | 71791787 | 71791981 | HDAC8   | NM_018486 | 11 | 11 | 2           | 53             | 181  | 8281   | 42,47  | 100                     |
| chrX | 71792550 | 71792759 | HDAC8   | NM_018486 | 11 | 11 | 1           | 111            | 448  | 14348  | 68,32  | 55,9                    |
| chrX | 73641132 | 73641945 | SLC16A2 | NM_006517 | 6  | 6  | 1           | 430            | 253  | 11538  | 14,17  | 100                     |
| chrX | 73740769 | 73740963 | SLC16A2 | NM_006517 | 6  | 6  | 2           | 145            | 1316 | 57121  | 292,93 | 95,9                    |
| chrX | 73744225 | 73744662 | SLC16A2 | NM_006517 | 6  | 6  | 3           | 451            | 3428 | 157783 | 360,24 | 93,1                    |
| chrX | 73745496 | 73745681 | SLC16A2 | NM_006517 | 6  | 6  | 4           | 144            | 871  | 38005  | 204,33 | 67,4                    |
| chrX | 73748946 | 73749232 | SLC16A2 | NM_006517 | 6  | 6  | 5           | 229            | 2006 | 83423  | 290,67 | 80,8                    |
| chrX | 73751203 | 73751501 | SLC16A2 | NM_006517 | 6  | 6  | 6           | 221            | 1919 | 84514  | 282,66 | 84,2                    |
| chrX | 76763738 | 76764169 | ATRX    | NM_000489 | 35 | 35 | 35          | 279            | 518  | 24426  | 56,54  | 100                     |
| chrX | 76776238 | 76776435 | ATRX    | NM_000489 | 35 | 35 | 34          | 129            | 105  | 4705   | 23,76  | 100                     |
| chrX | 76776807 | 76776992 | ATRX    | NM_000489 | 35 | 35 | 33          | 96             | 223  | 9252   | 49,74  | 100                     |
| chrX | 76777703 | 76777888 | ATRX    | NM_000489 | 35 | 35 | 32          | 126            | 391  | 17084  | 91,85  | 100                     |
| chrX | 76778710 | 76778895 | ATRX    | NM_000489 | 35 | 35 | 31          | 150            | 267  | 11624  | 62,49  | 100                     |
| chrX | 76812921 | 76813130 | ATRX    | NM_000489 | 35 | 35 | 30          | 195            | 245  | 10642  | 50,68  | 100                     |
| chrX | 76814134 | 76814322 | ATRX    | NM_000489 | 35 | 35 | 29          | 178            | 473  | 20502  | 108,48 | 100                     |
| chrX | 76829701 | 76829883 | ATRX    | NM_000489 | 35 | 35 | 28          | 109            | 530  | 22932  | 125,31 | 100                     |
| chrX | 76845292 | 76845486 | ATRX    | NM_000489 | 35 | 35 | 27          | 107            | 147  | 6690   | 34,31  | 100                     |
| chrX | 76849157 | 76849342 | ATRX    | NM_000489 | 35 | 35 | 26          | 154            | 977  | 42199  | 226,88 | 100                     |
| chrX | 76854843 | 76855262 | ATRX    | NM_000489 | 35 | 35 | 25,24       | 170,89         | 1504 | 69187  | 164,73 | 100.0,69.7              |
| chrX | 76855879 | 76856052 | ATRX    | NM_000489 | 35 | 35 | 23          | 131            | 1231 | 49986  | 287,28 | 100                     |
| chrX | 76871842 | 76872270 | ATRX    | NM_000489 | 35 | 35 | 22          | 118            | 341  | 16212  | 37,79  | 100                     |
| chrX | 76874243 | 76874416 | ATRX    | NM_000489 | 35 | 35 | 21          | 176            | 349  | 13858  | 79,64  | 81,2                    |
| chrX | 76875816 | 76876001 | ATRX    | NM_000489 | 35 | 35 | 20          | 138            | 159  | 6710   | 36,08  | 100                     |
| chrX | 76888717 | 76889228 | ATRX    | NM_000489 | 35 | 35 | 19,18       | 178,147        | 888  | 41362  | 80,79  | 87.6,100.0              |
| chrX | 76890021 | 76890221 | ATRX    | NM_000489 | 35 | 35 | 17          | 110            | 589  | 25435  | 126,54 | 100                     |
| chrX | 76891442 | 76891627 | ATRX    | NM_000489 | 35 | 35 | 16          | 142            | 100  | 4081   | 21,94  | 74,6                    |
| chrX | 76907538 | 76907788 | ATRX    | NM_000489 | 35 | 35 | 15          | 240            | 614  | 26906  | 107,2  | 77,1                    |
| chrX | 76909511 | 76909696 | ATRX    | NM_000489 | 35 | 35 | 14          | 103            | 260  | 12037  | 64,72  | 100                     |
| chrX | 76911966 | 76912154 | ATRX    | NM_000489 | 35 | 35 | 13          | 94             | 135  | 5694   | 30,13  | 100                     |
| chrX | 76918858 | 76919049 | ATRX    | NM_000489 | 35 | 35 | 12          | 177            | 94   | 3869   | 20,15  | 100                     |
| chrX | 76920031 | 76920246 | ATRX    | NM_000489 | 35 | 35 | 11          | 134            | 400  | 17314  | 80,16  | 84,3                    |
| chrX | 76931626 | 76931817 | ATRX    | NM_000489 | 35 | 35 | 10          | 73             | 617  | 27243  | 141,89 | 100                     |
| chrX | 76936993 | 76940058 | ATRX    | NM_000489 | 35 | 35 | 9           | 3074           | 7560 | 367483 | 119,86 | 99,1                    |
| chrX | 76940346 | 76940522 | ATRX    | NM_000489 | 35 | 35 | 8           | 68             | 748  | 32858  | 185,64 | 100                     |
| chrX | 76944307 | 76944483 | ATRX    | NM_000489 | 35 | 35 | 7           | 110            | 347  | 15081  | 85,2   | 100                     |
| chrX | 76949215 | 76949516 | ATRX    | NM_000489 | 35 | 35 | 6           | 114            | 193  | 9122   | 30,21  | 100                     |

|      |          |          |       |           |    |    |       |         |      |        |        |             |
|------|----------|----------|-------|-----------|----|----|-------|---------|------|--------|--------|-------------|
| chrX | 76952073 | 76952303 | ATRX  | NM_000489 | 35 | 35 | 5     | 128     | 250  | 11443  | 49,54  | 93,8        |
| chrX | 76953005 | 76953181 | ATRX  | NM_000489 | 35 | 35 | 4     | 53      | 470  | 20066  | 113,37 | 100         |
| chrX | 76953917 | 76954129 | ATRX  | NM_000489 | 35 | 35 | 3     | 56      | 429  | 18240  | 85,63  | 100         |
| chrX | 76972578 | 76972748 | ATRX  | NM_000489 | 35 | 35 | 2     | 113     | 202  | 8925   | 52,19  | 100         |
| chrX | 77086252 | 77086452 | MAGT1 | NM_032121 | 10 | 10 | 9     | 91      | 200  | 8862   | 44,09  | 100         |
| chrX | 77096664 | 77096852 | MAGT1 | NM_032121 | 10 | 10 | 8     | 75      | 443  | 18326  | 96,96  | 100         |
| chrX | 77109254 | 77109469 | MAGT1 | NM_032121 | 10 | 10 | 7     | 64      | 163  | 7308   | 33,83  | 100         |
| chrX | 77110927 | 77111112 | MAGT1 | NM_032121 | 10 | 10 | 6     | 90      | 592  | 26014  | 139,86 | 100         |
| chrX | 77112208 | 77112396 | MAGT1 | NM_032121 | 10 | 10 | 5     | 141     | 398  | 18189  | 96,24  | 100         |
| chrX | 77112814 | 77113020 | MAGT1 | NM_032121 | 10 | 10 | 4     | 141     | 801  | 35891  | 173,39 | 100         |
| chrX | 77126275 | 77126472 | MAGT1 | NM_032121 | 10 | 10 | 3     | 118     | 588  | 26092  | 131,78 | 100         |
| chrX | 77130882 | 77131088 | MAGT1 | NM_032121 | 10 | 10 | 2     | 170     | 1129 | 47852  | 231,17 | 96,5        |
| chrX | 77150863 | 77151051 | MAGT1 | NM_032121 | 10 | 10 | 1     | 198     | 403  | 16983  | 89,86  | 71,2        |
| chrX | 77227117 | 77227308 | ATP7A | NM_000052 | 23 | 22 | 2     | 120     | 153  | 6330   | 32,97  | 100         |
| chrX | 77243707 | 77244197 | ATP7A | NM_000052 | 23 | 22 | 3     | 490     | 2027 | 95143  | 193,77 | 93,9        |
| chrX | 77244723 | 77245471 | ATP7A | NM_000052 | 23 | 22 | 4     | 726     | 1985 | 95777  | 127,87 | 100         |
| chrX | 77253947 | 77254150 | ATP7A | NM_000052 | 23 | 22 | 5     | 207     | 510  | 22230  | 108,97 | 85          |
| chrX | 77258539 | 77258748 | ATP7A | NM_000052 | 23 | 22 | 6     | 164     | 485  | 22399  | 106,66 | 100         |
| chrX | 77264543 | 77264897 | ATP7A | NM_000052 | 23 | 22 | 7     | 162     | 1140 | 54240  | 152,79 | 100         |
| chrX | 77266604 | 77266798 | ATP7A | NM_000052 | 23 | 22 | 8     | 77      | 171  | 7323   | 37,55  | 100         |
| chrX | 77266942 | 77267275 | ATP7A | NM_000052 | 23 | 22 | 9     | 226     | 539  | 25189  | 75,42  | 100         |
| chrX | 77268388 | 77268659 | ATP7A | NM_000052 | 23 | 22 | 10    | 234     | 1080 | 48645  | 178,84 | 94,9        |
| chrX | 77270158 | 77270361 | ATP7A | NM_000052 | 23 | 22 | 11    | 92      | 418  | 17667  | 86,6   | 100         |
| chrX | 77271169 | 77271393 | ATP7A | NM_000052 | 23 | 22 | 12    | 128     | 147  | 6497   | 28,88  | 100         |
| chrX | 77275678 | 77275899 | ATP7A | NM_000052 | 23 | 22 | 13    | 155     | 840  | 35986  | 162,1  | 100         |
| chrX | 77276435 | 77276626 | ATP7A | NM_000052 | 23 | 22 | 14    | 135     | 256  | 11407  | 59,41  | 100         |
| chrX | 77284719 | 77284913 | ATP7A | NM_000052 | 23 | 22 | 15    | 195     | 651  | 29651  | 152,06 | 85,6        |
| chrX | 77286900 | 77287085 | ATP7A | NM_000052 | 23 | 22 | 16    | 183     | 306  | 12420  | 66,77  | 98,9        |
| chrX | 77289031 | 77289326 | ATP7A | NM_000052 | 23 | 22 | 17    | 217     | 624  | 27024  | 91,3   | 100         |
| chrX | 77294267 | 77294464 | ATP7A | NM_000052 | 23 | 22 | 18    | 147     | 112  | 5165   | 26,09  | 89,1        |
| chrX | 77296047 | 77296250 | ATP7A | NM_000052 | 23 | 22 | 19    | 143     | 450  | 18922  | 92,75  | 100         |
| chrX | 77298054 | 77298242 | ATP7A | NM_000052 | 23 | 22 | 20    | 204     | 190  | 8397   | 44,43  | 78,4        |
| chrX | 77298824 | 77299027 | ATP7A | NM_000052 | 23 | 22 | 21    | 118     | 278  | 10959  | 53,72  | 92,4        |
| chrX | 77300920 | 77301117 | ATP7A | NM_000052 | 23 | 22 | 22    | 103     | 543  | 23084  | 116,59 | 100         |
| chrX | 77301714 | 77302157 | ATP7A | NM_000052 | 23 | 22 | 23    | 277     | 1726 | 82326  | 185,42 | 100         |
| chrX | 77359679 | 77359858 | PGK1  | NM_000291 | 11 | 11 | 1     | 65      | 147  | 6353   | 35,29  | 32,3        |
| chrX | 77365363 | 77365533 | PGK1  | NM_000291 | 11 | 11 | 2     | 51      | 348  | 14386  | 84,13  | 100         |
| chrX | 77369297 | 77369553 | PGK1  | NM_000291 | 11 | 11 | 3,4   | 156.145 | 1003 | 44968  | 174,97 | 64.1,28.3   |
| chrX | 77369623 | 77369743 | PGK1  | NM_000291 | 11 | 11 | 4     | 145     | 217  | 8231   | 68,02  | 24,1        |
| chrX | 77372832 | 77373029 | PGK1  | NM_000291 | 11 | 11 | 5     | 104     | 658  | 29594  | 149,46 | 77,9        |
| chrX | 77373582 | 77373782 | PGK1  | NM_000291 | 11 | 11 | 6     | 120     | 133  | 6105   | 30,37  | 71,7        |
| chrX | 77378425 | 77378545 | PGK1  | NM_000291 | 11 | 11 | 7     | 115     | 115  | 3987   | 32,95  | 19,1        |
| chrX | 77378836 | 77378956 | PGK1  | NM_000291 | 11 | 11 | 8     | 180     | 160  | 6254   | 51,69  | 20          |
| chrX | 77380514 | 77380634 | PGK1  | NM_000291 | 11 | 11 | 9     | 178     | 139  | 5059   | 41,81  | 19,7        |
| chrX | 77380847 | 77381038 | PGK1  | NM_000291 | 11 | 11 | 10    | 99      | 218  | 8132   | 42,35  | 76,8        |
| chrX | 79932008 | 79932916 | BRWD3 | NM_153252 | 41 | 41 | 41    | 755     | 3960 | 188911 | 207,82 | 100         |
| chrX | 79936806 | 79937018 | BRWD3 | NM_153252 | 41 | 41 | 40    | 159     | 227  | 10265  | 48,19  | 100         |
| chrX | 79937417 | 79937611 | BRWD3 | NM_153252 | 41 | 41 | 39    | 98      | 316  | 14312  | 73,39  | 100         |
| chrX | 79937915 | 79938115 | BRWD3 | NM_153252 | 41 | 41 | 38    | 164     | 1002 | 43715  | 217,49 | 92,7        |
| chrX | 79939523 | 79939699 | BRWD3 | NM_153252 | 41 | 41 | 37    | 153     | 121  | 4812   | 27,19  | 90,8        |
| chrX | 79940912 | 79941094 | BRWD3 | NM_153252 | 41 | 41 | 36    | 75      | 257  | 10591  | 57,87  | 100         |
| chrX | 79942325 | 79942516 | BRWD3 | NM_153252 | 41 | 41 | 35    | 141     | 285  | 11765  | 61,28  | 100         |
| chrX | 79943438 | 79943626 | BRWD3 | NM_153252 | 41 | 41 | 34    | 57      | 377  | 15905  | 84,15  | 100         |
| chrX | 79945239 | 79945620 | BRWD3 | NM_153252 | 41 | 41 | 33,32 | 79.126  | 665  | 29815  | 78,05  | 100.0,100.0 |
| chrX | 79946526 | 79946711 | BRWD3 | NM_153252 | 41 | 41 | 31    | 121     | 202  | 8817   | 47,4   | 100         |
| chrX | 79947245 | 79947620 | BRWD3 | NM_153252 | 41 | 41 | 30,29 | 156,62  | 982  | 46123  | 122,67 | 100.0,53.2  |
| chrX | 79948397 | 79948591 | BRWD3 | NM_153252 | 41 | 41 | 28    | 112     | 672  | 28956  | 148,49 | 100         |

|      |           |           |         |              |    |    |     |         |      |        |        |             |
|------|-----------|-----------|---------|--------------|----|----|-----|---------|------|--------|--------|-------------|
| chrX | 79951362  | 79951532  | BRWD3   | NM_153252    | 41 | 41 | 27  | 83      | 92   | 3751   | 21,94  | 100         |
| chrX | 79952193  | 79952396  | BRWD3   | NM_153252    | 41 | 41 | 26  | 125     | 826  | 34130  | 167,3  | 100         |
| chrX | 79955367  | 79955564  | BRWD3   | NM_153252    | 41 | 41 | 25  | 108     | 558  | 23132  | 116,83 | 100         |
| chrX | 79958908  | 79959120  | BRWD3   | NM_153252    | 41 | 41 | 24  | 114     | 367  | 15229  | 71,5   | 100         |
| chrX | 79960166  | 79960351  | BRWD3   | NM_153252    | 41 | 41 | 23  | 169     | 464  | 19526  | 104,98 | 100         |
| chrX | 79962896  | 79963078  | BRWD3   | NM_153252    | 41 | 41 | 22  | 77      | 1481 | 64352  | 351,65 | 100         |
| chrX | 79964910  | 79965104  | BRWD3   | NM_153252    | 41 | 41 | 21  | 150     | 773  | 34112  | 174,93 | 100         |
| chrX | 79971566  | 79971769  | BRWD3   | NM_153252    | 41 | 41 | 20  | 94      | 153  | 6731   | 33     | 100         |
| chrX | 79973031  | 79973243  | BRWD3   | NM_153252    | 41 | 41 | 19  | 187     | 535  | 23406  | 109,89 | 92          |
| chrX | 79975001  | 79975192  | BRWD3   | NM_153252    | 41 | 41 | 18  | 168     | 673  | 29069  | 151,4  | 92,3        |
| chrX | 79978039  | 79978310  | BRWD3   | NM_153252    | 41 | 41 | 17  | 226     | 298  | 12712  | 46,74  | 100         |
| chrX | 79979240  | 79979437  | BRWD3   | NM_153252    | 41 | 41 | 16  | 129     | 334  | 14895  | 75,23  | 100         |
| chrX | 79980380  | 79980577  | BRWD3   | NM_153252    | 41 | 41 | 15  | 135     | 444  | 17985  | 90,83  | 100         |
| chrX | 79984242  | 79984427  | BRWD3   | NM_153252    | 41 | 41 | 14  | 154     | 422  | 18408  | 98,97  | 100         |
| chrX | 79985378  | 79985554  | BRWD3   | NM_153252    | 41 | 41 | 13  | 105     | 510  | 21530  | 121,64 | 100         |
| chrX | 79988799  | 79989005  | BRWD3   | NM_153252    | 41 | 41 | 12  | 41      | 255  | 11149  | 53,86  | 100         |
| chrX | 79989542  | 79989721  | BRWD3   | NM_153252    | 41 | 41 | 11  | 101     | 798  | 34089  | 189,38 | 100         |
| chrX | 79990572  | 79990760  | BRWD3   | NM_153252    | 41 | 41 | 10  | 71      | 67   | 2916   | 15,43  | 100         |
| chrX | 79991466  | 79991651  | BRWD3   | NM_153252    | 41 | 41 | 9   | 101     | 117  | 5530   | 29,73  | 100         |
| chrX | 79999498  | 79999793  | BRWD3   | NM_153252    | 41 | 41 | 8   | 222     | 391  | 17288  | 58,41  | 100         |
| chrX | 80001050  | 80001247  | BRWD3   | NM_153252    | 41 | 41 | 7   | 161     | 135  | 6354   | 32,09  | 100         |
| chrX | 80047301  | 80047501  | BRWD3   | NM_153252    | 41 | 41 | 6   | 99      | 140  | 5802   | 28,87  | 100         |
| chrX | 80049053  | 80049277  | BRWD3   | NM_153252    | 41 | 41 | 5   | 151     | 1578 | 72387  | 321,72 | 100         |
| chrX | 80063913  | 80064119  | BRWD3   | NM_153252    | 41 | 41 | 4   | 60      | 239  | 9518   | 45,98  | 100         |
| chrX | 80064459  | 80064641  | BRWD3   | NM_153252    | 41 | 41 | 3   | 30      | 100  | 4776   | 26,1   | 100         |
| chrX | 80064723  | 80065062  | BRWD3   | NM_153252    | 41 | 41 | 2,1 | 59,31   | 275  | 12315  | 36,22  | 100,0,100,0 |
| chrX | 84502444  | 84502638  | ZNF711  | NM_021998    | 9  | 7  | 3   | 79      | 178  | 7523   | 38,58  | 75,9        |
| chrX | 84510250  | 84510826  | ZNF711  | NM_021998    | 9  | 7  | 4   | 543     | 1571 | 73637  | 127,62 | 100         |
| chrX | 84519264  | 84519452  | ZNF711  | NM_021998    | 9  | 7  | 5   | 156     | 424  | 18210  | 96,35  | 100         |
| chrX | 84520077  | 84520298  | ZNF711  | NM_021998    | 9  | 7  | 6   | 138     | 202  | 9091   | 40,95  | 100         |
| chrX | 84523295  | 84523471  | ZNF711  | NM_021998    | 9  | 7  | 7   | 48      | 540  | 21880  | 123,62 | 100         |
| chrX | 84525025  | 84525213  | ZNF711  | NM_021998    | 9  | 7  | 8   | 144     | 193  | 8399   | 44,44  | 88,9        |
| chrX | 84525613  | 84526924  | ZNF711  | NM_021998    | 9  | 7  | 9   | 1178    | 3234 | 154369 | 117,66 | 100         |
| chrX | 99551168  | 99551836  | PCDH19  | NM_001184880 | 6  | 6  | 6   | 599     | 2939 | 141367 | 211,31 | 93,8        |
| chrX | 99596811  | 99597032  | PCDH19  | NM_001184880 | 6  | 6  | 5   | 173     | 1084 | 46784  | 210,74 | 76,3        |
| chrX | 99605626  | 99605838  | PCDH19  | NM_001184880 | 6  | 6  | 4   | 59      | 396  | 17300  | 81,22  | 100         |
| chrX | 99657580  | 99657925  | PCDH19  | NM_001184880 | 6  | 6  | 3   | 328     | 819  | 36863  | 106,54 | 82,3        |
| chrX | 99658566  | 99658760  | PCDH19  | NM_001184880 | 6  | 6  | 2   | 141     | 803  | 33494  | 171,76 | 68,8        |
| chrX | 99661355  | 99663703  | PCDH19  | NM_001184880 | 6  | 6  | 1   | 2147    | 7058 | 342161 | 145,66 | 100         |
| chrX | 99901148  | 99901330  | SRPX2   | NM_014467    | 11 | 10 | 2   | 82      | 673  | 27408  | 149,77 | 13,4        |
| chrX | 99905670  | 99905846  | SRPX2   | NM_014467    | 11 | 10 | 3   | 81      | 340  | 14533  | 82,11  | 80,2        |
| chrX | 99917099  | 99917305  | SRPX2   | NM_014467    | 11 | 10 | 4   | 192     | 690  | 31246  | 150,95 | 69,3        |
| chrX | 99919743  | 99919913  | SRPX2   | NM_014467    | 11 | 10 | 5   | 177     | 507  | 21189  | 123,91 | 80,8        |
| chrX | 99920262  | 99920693  | SRPX2   | NM_014467    | 11 | 10 | 6,7 | 127,122 | 1796 | 84800  | 196,3  | 82,7,100,0  |
| chrX | 99921665  | 99921865  | SRPX2   | NM_014467    | 11 | 10 | 8   | 180     | 1088 | 49162  | 244,59 | 63,9        |
| chrX | 99922267  | 99922476  | SRPX2   | NM_014467    | 11 | 10 | 9   | 134     | 809  | 35329  | 168,23 | 100         |
| chrX | 99924145  | 99924339  | SRPX2   | NM_014467    | 11 | 10 | 10  | 122     | 322  | 14986  | 76,85  | 77,9        |
| chrX | 99925827  | 99926092  | SRPX2   | NM_014467    | 11 | 10 | 11  | 181     | 579  | 27724  | 104,23 | 87,3        |
| chrX | 100601604 | 100601724 | TIMM8A  | NM_004085    | 2  | 2  | 2   | 162     | 216  | 8581   | 70,92  | 27,8        |
| chrX | 100603380 | 100603749 | TIMM8A  | NM_004085    | 2  | 2  | 1   | 132     | 794  | 36315  | 98,15  | 100         |
| chrX | 102192158 | 102192278 | RAB40AL | NM_001031834 | 1  | 1  | 1   | 837     | 43   | 1281   | 10,59  | 3,8         |
| chrX | 102192318 | 102192438 | RAB40AL | NM_001031834 | 1  | 1  | 1   | 837     | 355  | 13750  | 113,64 | 14,5        |
| chrX | 102192940 | 102193063 | RAB40AL | NM_001031834 | 1  | 1  | 1   | 837     | 106  | 3009   | 24,27  | 14,8        |
| chrX | 102193068 | 102193188 | RAB40AL | NM_001031834 | 1  | 1  | 1   | 837     | 209  | 7924   | 65,49  | 1,9         |
| chrX | 103031768 | 103031995 | PLP1    | NM_001128834 | 8  | 7  | 2   | 4       | 96   | 4044   | 17,74  | 100         |
| chrX | 103040575 | 103040763 | PLP1    | NM_001128834 | 8  | 7  | 3   | 187     | 359  | 14082  | 74,51  | 65,8        |
| chrX | 103041329 | 103041609 | PLP1    | NM_001128834 | 8  | 7  | 4   | 262     | 369  | 16050  | 57,12  | 82,4        |



|      |           |           |       |              |    |    |     |         |      |        |        |             |
|------|-----------|-----------|-------|--------------|----|----|-----|---------|------|--------|--------|-------------|
| chrX | 103042782 | 103042973 | PLP1  | NM_001128834 | 8  | 7  | 5   | 169     | 496  | 21277  | 110,82 | 67,5        |
| chrX | 103043374 | 103043556 | PLP1  | NM_001128834 | 8  | 7  | 6   | 74      | 411  | 17397  | 95,07  | 89,2        |
| chrX | 103044173 | 103044364 | PLP1  | NM_001128834 | 8  | 7  | 7   | 66      | 613  | 25768  | 134,21 | 100         |
| chrX | 103045380 | 103045666 | PLP1  | NM_001128834 | 8  | 7  | 8   | 72      | 1293 | 58985  | 205,52 | 100         |
| chrX | 106882585 | 106882791 | PRPS1 | NM_002764    | 7  | 7  | 2   | 184     | 217  | 8312   | 40,15  | 67,4        |
| chrX | 106884176 | 106884438 | PRPS1 | NM_002764    | 7  | 7  | 3   | 99      | 659  | 28929  | 110    | 55,6        |
| chrX | 106885620 | 106885814 | PRPS1 | NM_002764    | 7  | 7  | 4   | 125     | 622  | 25469  | 130,61 | 80,8        |
| chrX | 106888468 | 106888665 | PRPS1 | NM_002764    | 7  | 7  | 5   | 174     | 581  | 22922  | 115,77 | 64,9        |
| chrX | 106890872 | 106891078 | PRPS1 | NM_002764    | 7  | 7  | 6   | 160     | 352  | 15548  | 75,11  | 77,5        |
| chrX | 106893096 | 106893400 | PRPS1 | NM_002764    | 7  | 7  | 7   | 93      | 549  | 26117  | 85,63  | 100         |
| chrX | 108887120 | 108887462 | ACSL4 | NM_022977    | 17 | 14 | 17  | 158     | 923  | 44072  | 128,49 | 100         |
| chrX | 108902561 | 108902752 | ACSL4 | NM_022977    | 17 | 14 | 16  | 158     | 384  | 16225  | 84,51  | 100         |
| chrX | 108904728 | 108904910 | ACSL4 | NM_022977    | 17 | 14 | 15  | 115     | 1016 | 42640  | 233,01 | 100         |
| chrX | 108906429 | 108906635 | ACSL4 | NM_022977    | 17 | 14 | 14  | 192     | 523  | 23607  | 114,04 | 100         |
| chrX | 108908591 | 108908788 | ACSL4 | NM_022977    | 17 | 14 | 13  | 75      | 336  | 14995  | 75,73  | 100         |
| chrX | 108911300 | 108911530 | ACSL4 | NM_022977    | 17 | 14 | 12  | 173     | 251  | 10962  | 47,45  | 100         |
| chrX | 108912211 | 108912387 | ACSL4 | NM_022977    | 17 | 14 | 11  | 140     | 78   | 3315   | 18,73  | 89,3        |
| chrX | 108917563 | 108917751 | ACSL4 | NM_022977    | 17 | 14 | 10  | 72      | 66   | 2910   | 15,4   | 100         |
| chrX | 108921150 | 108921581 | ACSL4 | NM_022977    | 17 | 14 | 9,8 | 124.151 | 989  | 46388  | 107,38 | 100.0,58.3  |
| chrX | 108924204 | 108924626 | ACSL4 | NM_022977    | 17 | 14 | 7,6 | 139.110 | 774  | 35703  | 84,4   | 100.0,100.0 |
| chrX | 108925951 | 108926121 | ACSL4 | NM_022977    | 17 | 14 | 5   | 178     | 468  | 19324  | 113,01 | 96,1        |
| chrX | 108926371 | 108926808 | ACSL4 | NM_022977    | 17 | 14 | 4   | 351     | 1492 | 71385  | 162,98 | 98,3        |
| chrX | 110366248 | 110366430 | PAK3  | NM_001128168 | 16 | 16 | 1   | 175     | 126  | 5596   | 30,58  | 56,6        |
| chrX | 110385270 | 110385485 | PAK3  | NM_001128168 | 16 | 16 | 2   | 101     | 216  | 9810   | 45,42  | 100         |
| chrX | 110388015 | 110388218 | PAK3  | NM_001128168 | 16 | 16 | 3   | 63      | 459  | 20392  | 99,96  | 100         |
| chrX | 110389616 | 110389804 | PAK3  | NM_001128168 | 16 | 16 | 4   | 45      | 480  | 19685  | 104,15 | 100         |
| chrX | 110390950 | 110391141 | PAK3  | NM_001128168 | 16 | 16 | 5   | 154     | 264  | 11071  | 57,66  | 100         |
| chrX | 110395562 | 110395753 | PAK3  | NM_001128168 | 16 | 16 | 6   | 38      | 322  | 13779  | 71,77  | 100         |
| chrX | 110406111 | 110406317 | PAK3  | NM_001128168 | 16 | 16 | 7   | 132     | 124  | 5096   | 24,62  | 100         |
| chrX | 110406772 | 110406978 | PAK3  | NM_001128168 | 16 | 16 | 8   | 166     | 301  | 12399  | 59,9   | 100         |
| chrX | 110416147 | 110416332 | PAK3  | NM_001128168 | 16 | 16 | 9   | 64      | 372  | 15571  | 83,72  | 100         |
| chrX | 110435308 | 110435508 | PAK3  | NM_001128168 | 16 | 16 | 10  | 49      | 369  | 14776  | 73,51  | 100         |
| chrX | 110435656 | 110435844 | PAK3  | NM_001128168 | 16 | 16 | 11  | 113     | 33   | 1429   | 7,56   | 98,2        |
| chrX | 110437508 | 110437729 | PAK3  | NM_001128168 | 16 | 16 | 12  | 118     | 432  | 18825  | 84,8   | 100         |
| chrX | 110439031 | 110439210 | PAK3  | NM_001128168 | 16 | 16 | 13  | 100     | 357  | 14614  | 81,19  | 100         |
| chrX | 110439738 | 110439929 | PAK3  | NM_001128168 | 16 | 16 | 14  | 197     | 281  | 12197  | 63,53  | 66,5        |
| chrX | 110459614 | 110459826 | PAK3  | NM_001128168 | 16 | 16 | 15  | 138     | 211  | 8946   | 42     | 100         |
| chrX | 110463530 | 110463810 | PAK3  | NM_001128168 | 16 | 16 | 16  | 90      | 1302 | 60378  | 214,87 | 100         |
| chrX | 110544759 | 110545033 | DCX   | NM_000555    | 7  | 7  | 7   | 57      | 1609 | 76145  | 276,89 | 100         |
| chrX | 110555756 | 110555944 | DCX   | NM_000555    | 7  | 7  | 6   | 95      | 301  | 12208  | 64,59  | 78,9        |
| chrX | 110574025 | 110574228 | DCX   | NM_000555    | 7  | 7  | 5   | 123     | 287  | 12864  | 63,06  | 66,7        |
| chrX | 110576229 | 110576423 | DCX   | NM_000555    | 7  | 7  | 4   | 103     | 415  | 17997  | 92,29  | 100         |
| chrX | 110644192 | 110644573 | DCX   | NM_000555    | 7  | 7  | 3   | 341     | 909  | 43643  | 114,25 | 100         |
| chrX | 110653160 | 110653630 | DCX   | NM_000555    | 7  | 7  | 2   | 386     | 3244 | 158998 | 337,58 | 95,3        |
| chrX | 110653932 | 110654277 | DCX   | NM_000555    | 7  | 7  | 1   | 221     | 537  | 25375  | 73,34  | 100         |
| chrX | 115303427 | 115304726 | AGTR2 | NM_000686    | 3  | 1  | 3   | 1092    | 4672 | 226961 | 174,59 | 100         |
| chrX | 118708557 | 118709006 | UBE2A | NM_003336    | 6  | 6  | 1,2 | 44,81   | 134  | 5985   | 13,3   | 100.0,100.0 |
| chrX | 118709262 | 118709438 | UBE2A | NM_003336    | 6  | 6  | 3   | 26      | 390  | 17043  | 96,29  | 100         |
| chrX | 118715317 | 118715526 | UBE2A | NM_003336    | 6  | 6  | 4   | 90      | 412  | 16638  | 79,23  | 63,3        |
| chrX | 118716503 | 118716682 | UBE2A | NM_003336    | 6  | 6  | 5   | 89      | 134  | 5816   | 32,31  | 100         |
| chrX | 118717035 | 118717309 | UBE2A | NM_003336    | 6  | 6  | 6   | 129     | 641  | 27497  | 99,99  | 100         |
| chrX | 118968783 | 118969054 | UPF3B | NM_080632    | 11 | 11 | 11  | 150     | 1600 | 73136  | 268,88 | 100         |
| chrX | 118971708 | 118971970 | UPF3B | NM_080632    | 11 | 11 | 10  | 295     | 1031 | 44807  | 170,37 | 85,1        |
| chrX | 118972294 | 118972473 | UPF3B | NM_080632    | 11 | 11 | 9   | 161     | 465  | 19330  | 107,39 | 89,4        |
| chrX | 118974455 | 118974667 | UPF3B | NM_080632    | 11 | 11 | 8   | 39      | 722  | 29328  | 137,69 | 100         |
| chrX | 118975089 | 118975304 | UPF3B | NM_080632    | 11 | 11 | 7   | 183     | 249  | 10768  | 49,85  | 72,7        |
| chrX | 118975694 | 118975885 | UPF3B | NM_080632    | 11 | 11 | 6   | 44      | 664  | 26617  | 138,63 | 100         |

|      |           |           |        |              |    |    |     |         |      |       |        |            |
|------|-----------|-----------|--------|--------------|----|----|-----|---------|------|-------|--------|------------|
| chrX | 118977048 | 118977242 | UPF3B  | NM_080632    | 11 | 11 | 5   | 111     | 561  | 23212 | 119,04 | 80,2       |
| chrX | 118979166 | 118979363 | UPF3B  | NM_080632    | 11 | 11 | 4   | 99      | 171  | 6127  | 30,94  | 94,9       |
| chrX | 118985375 | 118985818 | UPF3B  | NM_080632    | 11 | 11 | 3,2 | 107.107 | 206  | 9455  | 21,3   | 100,0.83.2 |
| chrX | 118986776 | 118986958 | UPF3B  | NM_080632    | 11 | 11 | 1   | 156     | 525  | 19696 | 107,63 | 74,4       |
| chrX | 119005733 | 119005992 | NDUFA1 | NM_004541    | 3  | 3  | 1   | 102     | 886  | 40706 | 156,56 | 100        |
| chrX | 119007238 | 119007456 | NDUFA1 | NM_004541    | 3  | 3  | 2   | 90      | 2291 | 97365 | 444,59 | 100        |
| chrX | 119010434 | 119010604 | NDUFA1 | NM_004541    | 3  | 3  | 3   | 21      | 438  | 19160 | 112,05 | 100        |
| chrX | 119562257 | 119562537 | LAMP2  | NM_001122606 | 9  | 9  | 9   | 143     | 388  | 18294 | 65,1   | 100        |
| chrX | 119575587 | 119575790 | LAMP2  | NM_001122606 | 9  | 9  | 8   | 165     | 627  | 27476 | 134,69 | 98,8       |
| chrX | 119576361 | 119576549 | LAMP2  | NM_001122606 | 9  | 9  | 7   | 64      | 804  | 34134 | 180,6  | 100        |
| chrX | 119580135 | 119580362 | LAMP2  | NM_001122606 | 9  | 9  | 6   | 123     | 257  | 9741  | 42,72  | 100        |
| chrX | 119581747 | 119581953 | LAMP2  | NM_001122606 | 9  | 9  | 5   | 185     | 103  | 4543  | 21,95  | 72,4       |
| chrX | 119582767 | 119582958 | LAMP2  | NM_001122606 | 9  | 9  | 4   | 159     | 239  | 10804 | 56,27  | 84,3       |
| chrX | 119589275 | 119589475 | LAMP2  | NM_001122606 | 9  | 9  | 3   | 214     | 698  | 31125 | 154,85 | 70,6       |
| chrX | 119590518 | 119590721 | LAMP2  | NM_001122606 | 9  | 9  | 2   | 119     | 130  | 5239  | 25,68  | 89,9       |
| chrX | 119602973 | 119603185 | LAMP2  | NM_001122606 | 9  | 9  | 1   | 64      | 187  | 7037  | 33,04  | 81,2       |
| chrX | 119660490 | 119660767 | CUL4B  | NM_003588    | 22 | 21 | 22  | 96      | 634  | 29140 | 104,82 | 100        |
| chrX | 119663926 | 119664117 | CUL4B  | NM_003588    | 22 | 21 | 21  | 153     | 670  | 28386 | 147,84 | 100        |
| chrX | 119666322 | 119666522 | CUL4B  | NM_003588    | 22 | 21 | 20  | 173     | 1082 | 48514 | 241,36 | 74         |
| chrX | 119668243 | 119668458 | CUL4B  | NM_003588    | 22 | 21 | 19  | 106     | 182  | 8354  | 38,68  | 100        |
| chrX | 119669656 | 119669835 | CUL4B  | NM_003588    | 22 | 21 | 18  | 114     | 935  | 41044 | 228,02 | 100        |
| chrX | 119670720 | 119670899 | CUL4B  | NM_003588    | 22 | 21 | 17  | 108     | 315  | 13523 | 75,13  | 100        |
| chrX | 119671859 | 119672065 | CUL4B  | NM_003588    | 22 | 21 | 16  | 86      | 218  | 9803  | 47,36  | 100        |
| chrX | 119672445 | 119672633 | CUL4B  | NM_003588    | 22 | 21 | 15  | 111     | 470  | 20524 | 108,59 | 100        |
| chrX | 119673146 | 119673319 | CUL4B  | NM_003588    | 22 | 21 | 14  | 105     | 480  | 19545 | 112,33 | 78,1       |
| chrX | 119674199 | 119674381 | CUL4B  | NM_003588    | 22 | 21 | 13  | 193     | 309  | 13248 | 72,39  | 81,3       |
| chrX | 119675385 | 119675579 | CUL4B  | NM_003588    | 22 | 21 | 12  | 119     | 389  | 17305 | 88,74  | 100        |
| chrX | 119676757 | 119676963 | CUL4B  | NM_003588    | 22 | 21 | 11  | 68      | 167  | 7475  | 36,11  | 100        |
| chrX | 119677552 | 119677767 | CUL4B  | NM_003588    | 22 | 21 | 10  | 83      | 480  | 21215 | 98,22  | 100        |
| chrX | 119677892 | 119678086 | CUL4B  | NM_003588    | 22 | 21 | 9   | 90      | 354  | 14970 | 76,77  | 100        |
| chrX | 119678253 | 119678456 | CUL4B  | NM_003588    | 22 | 21 | 8   | 163     | 822  | 31107 | 152,49 | 74,2       |
| chrX | 119679247 | 119679423 | CUL4B  | NM_003588    | 22 | 21 | 7   | 74      | 144  | 5038  | 28,46  | 100        |
| chrX | 119680393 | 119680611 | CUL4B  | NM_003588    | 22 | 21 | 6   | 70      | 657  | 28900 | 131,96 | 100        |
| chrX | 119680927 | 119681127 | CUL4B  | NM_003588    | 22 | 21 | 5   | 104     | 139  | 6034  | 30,02  | 100        |
| chrX | 119691772 | 119691951 | CUL4B  | NM_003588    | 22 | 21 | 4   | 116     | 252  | 11028 | 61,27  | 100        |
| chrX | 119693799 | 119694500 | CUL4B  | NM_003588    | 22 | 21 | 3   | 543     | 1954 | 89561 | 127,58 | 100        |
| chrX | 119708359 | 119708583 | CUL4B  | NM_003588    | 22 | 21 | 2   | 67      | 1274 | 57188 | 254,17 | 100        |
| chrX | 122318230 | 122318495 | GRIA3  | NM_000828    | 16 | 15 | 1   | 109     | 308  | 12656 | 47,58  | 99,1       |
| chrX | 122319737 | 122319907 | GRIA3  | NM_000828    | 16 | 15 | 2   | 159     | 1596 | 66204 | 387,16 | 66,7       |
| chrX | 122387187 | 122387482 | GRIA3  | NM_000828    | 16 | 15 | 3   | 240     | 903  | 40967 | 138,4  | 86,2       |
| chrX | 122459936 | 122460127 | GRIA3  | NM_000828    | 16 | 15 | 4   | 188     | 448  | 19759 | 102,91 | 68,6       |
| chrX | 122488684 | 122488878 | GRIA3  | NM_000828    | 16 | 15 | 5   | 54      | 635  | 27029 | 138,61 | 100        |
| chrX | 122528745 | 122528924 | GRIA3  | NM_000828    | 16 | 15 | 6   | 162     | 102  | 4656  | 25,87  | 65,4       |
| chrX | 122532539 | 122532724 | GRIA3  | NM_000828    | 16 | 15 | 7   | 168     | 132  | 5835  | 31,37  | 69         |
| chrX | 122536748 | 122536951 | GRIA3  | NM_000828    | 16 | 15 | 8   | 105     | 347  | 14999 | 73,52  | 100        |
| chrX | 122537153 | 122537344 | GRIA3  | NM_000828    | 16 | 15 | 9   | 108     | 1169 | 49790 | 259,32 | 75,9       |
| chrX | 122538534 | 122538731 | GRIA3  | NM_000828    | 16 | 15 | 10  | 207     | 175  | 8036  | 40,59  | 83,6       |
| chrX | 122551259 | 122551773 | GRIA3  | NM_000828    | 16 | 15 | 11  | 377     | 876  | 41733 | 81,03  | 98,4       |
| chrX | 122561829 | 122562026 | GRIA3  | NM_000828    | 16 | 15 | 12  | 199     | 589  | 25933 | 130,97 | 81,4       |
| chrX | 122598642 | 122598931 | GRIA3  | NM_000828    | 16 | 15 | 13  | 248     | 691  | 31247 | 107,75 | 87,1       |
| chrX | 122599636 | 122599756 | GRIA3  | NM_000828    | 16 | 15 | 14  | 115     | 179  | 7095  | 58,64  | 3,5        |
| chrX | 122616689 | 122616960 | GRIA3  | NM_000828    | 16 | 15 | 15  | 246     | 570  | 27863 | 102,44 | 84,1       |
| chrX | 128674230 | 128674424 | OCRL   | NM_000276    | 24 | 24 | 1   | 39      | 8    | 356   | 1,83   | 20,5       |
| chrX | 128674699 | 128674893 | OCRL   | NM_000276    | 24 | 24 | 2   | 80      | 692  | 30732 | 157,6  | 100        |
| chrX | 128678802 | 128679017 | OCRL   | NM_000276    | 24 | 24 | 3   | 80      | 555  | 24228 | 112,17 | 100        |
| chrX | 128682422 | 128682613 | OCRL   | NM_000276    | 24 | 24 | 4   | 39      | 207  | 9066  | 47,22  | 100        |
| chrX | 128691250 | 128691468 | OCRL   | NM_000276    | 24 | 24 | 5   | 111     | 194  | 7893  | 36,04  | 100        |

|      |           |           |        |              |    |    |       |         |      |        |        |            |
|------|-----------|-----------|--------|--------------|----|----|-------|---------|------|--------|--------|------------|
| chrX | 128691746 | 128691940 | OCRL   | NM_000276    | 24 | 24 | 6     | 90      | 504  | 22276  | 114,24 | 100        |
| chrX | 128692538 | 128692898 | OCRL   | NM_000276    | 24 | 24 | 7,8   | 121.162 | 689  | 32805  | 90,87  | 100,0,50.6 |
| chrX | 128694492 | 128694692 | OCRL   | NM_000276    | 24 | 24 | 9     | 102     | 394  | 18226  | 90,68  | 100        |
| chrX | 128695112 | 128695327 | OCRL   | NM_000276    | 24 | 24 | 10    | 115     | 221  | 9409   | 43,56  | 100        |
| chrX | 128696266 | 128696721 | OCRL   | NM_000276    | 24 | 24 | 11,12 | 117.188 | 1715 | 80853  | 177,31 | 100,0,77.7 |
| chrX | 128699680 | 128699862 | OCRL   | NM_000276    | 24 | 24 | 13    | 112     | 491  | 21467  | 117,31 | 100        |
| chrX | 128701221 | 128701406 | OCRL   | NM_000276    | 24 | 24 | 14    | 110     | 443  | 17532  | 94,26  | 100        |
| chrX | 128703205 | 128703405 | OCRL   | NM_000276    | 24 | 24 | 15    | 136     | 1071 | 45405  | 225,9  | 100        |
| chrX | 128709026 | 128709202 | OCRL   | NM_000276    | 24 | 24 | 16    | 111     | 319  | 13086  | 73,93  | 77,5       |
| chrX | 128709799 | 128709981 | OCRL   | NM_000276    | 24 | 24 | 17    | 166     | 829  | 37041  | 202,41 | 65,1       |
| chrX | 128710232 | 128710527 | OCRL   | NM_000276    | 24 | 24 | 18    | 236     | 795  | 36570  | 123,55 | 99,2       |
| chrX | 128718262 | 128718456 | OCRL   | NM_000276    | 24 | 24 | 19    | 24      | 780  | 32067  | 164,45 | 100        |
| chrX | 128720719 | 128721082 | OCRL   | NM_000276    | 24 | 24 | 20    | 117     | 846  | 36880  | 101,32 | 88,9       |
| chrX | 128722133 | 128722327 | OCRL   | NM_000276    | 24 | 24 | 21    | 85      | 432  | 17698  | 90,76  | 100        |
| chrX | 128722853 | 128723059 | OCRL   | NM_000276    | 24 | 24 | 22    | 128     | 993  | 43143  | 208,42 | 100        |
| chrX | 128723801 | 128724007 | OCRL   | NM_000276    | 24 | 24 | 23    | 112     | 1087 | 47409  | 229,03 | 100        |
| chrX | 128724160 | 128724354 | OCRL   | NM_000276    | 24 | 24 | 24    | 125     | 711  | 29464  | 151,1  | 70,4       |
| chrX | 128940238 | 128940408 | ZDHHC9 | NM_001008222 | 10 | 9  | 10    | 117     | 633  | 26787  | 156,65 | 53,8       |
| chrX | 128944786 | 128945007 | ZDHHC9 | NM_001008222 | 10 | 9  | 9     | 97      | 175  | 7529   | 33,91  | 100        |
| chrX | 128945318 | 128945527 | ZDHHC9 | NM_001008222 | 10 | 9  | 8     | 104     | 2471 | 109730 | 522,52 | 100        |
| chrX | 128946635 | 128946847 | ZDHHC9 | NM_001008222 | 10 | 9  | 7     | 103     | 313  | 13811  | 64,84  | 100        |
| chrX | 128947621 | 128947794 | ZDHHC9 | NM_001008222 | 10 | 9  | 6     | 49      | 351  | 15174  | 87,21  | 100        |
| chrX | 128948647 | 128948877 | ZDHHC9 | NM_001008222 | 10 | 9  | 5     | 138     | 434  | 19600  | 84,85  | 90,6       |
| chrX | 128957561 | 128957767 | ZDHHC9 | NM_001008222 | 10 | 9  | 4     | 159     | 322  | 13890  | 67,1   | 71,1       |
| chrX | 128962864 | 128963076 | ZDHHC9 | NM_001008222 | 10 | 9  | 3     | 161     | 901  | 39575  | 185,8  | 74,5       |
| chrX | 128975784 | 128975972 | ZDHHC9 | NM_001008222 | 10 | 9  | 2     | 167     | 363  | 15659  | 82,85  | 82,6       |
| chrX | 129263365 | 129263535 | AIFM1  | NM_004208    | 16 | 16 | 16    | 72      | 258  | 10736  | 62,78  | 5,6        |
| chrX | 129263876 | 129264070 | AIFM1  | NM_004208    | 16 | 16 | 15    | 197     | 775  | 33820  | 173,44 | 64         |
| chrX | 129265638 | 129265838 | AIFM1  | NM_004208    | 16 | 16 | 14    | 125     | 1893 | 87799  | 436,81 | 100        |
| chrX | 129267330 | 129267512 | AIFM1  | NM_004208    | 16 | 16 | 13    | 143     | 137  | 6085   | 33,25  | 70,6       |
| chrX | 129270061 | 129270258 | AIFM1  | NM_004208    | 16 | 16 | 12    | 141     | 316  | 13295  | 67,15  | 70,9       |
| chrX | 129270489 | 129270713 | AIFM1  | NM_004208    | 16 | 16 | 11    | 89      | 484  | 21275  | 94,56  | 100        |
| chrX | 129270960 | 129271655 | AIFM1  | NM_004208    | 16 | 16 | 10    | 108     | 1210 | 58147  | 83,54  | 100        |
| chrX | 129272515 | 129272730 | AIFM1  | NM_004208    | 16 | 16 | 9     | 109     | 212  | 8798   | 40,73  | 100        |
| chrX | 129273662 | 129273838 | AIFM1  | NM_004208    | 16 | 16 | 8     | 77      | 749  | 30408  | 171,8  | 89,6       |
| chrX | 129274449 | 129274640 | AIFM1  | NM_004208    | 16 | 16 | 7     | 85      | 660  | 26944  | 140,33 | 100        |
| chrX | 129279473 | 129279649 | AIFM1  | NM_004208    | 16 | 16 | 6     | 91      | 183  | 7689   | 43,44  | 79,1       |
| chrX | 129281508 | 129281939 | AIFM1  | NM_004208    | 16 | 16 | 5,4   | 131.125 | 1167 | 54499  | 126,16 | 69.5,100.0 |
| chrX | 129283387 | 129283596 | AIFM1  | NM_004208    | 16 | 16 | 3     | 100     | 646  | 27918  | 132,94 | 100        |
| chrX | 129290477 | 129290659 | AIFM1  | NM_004208    | 16 | 16 | 2     | 143     | 259  | 11247  | 61,46  | 70,6       |
| chrX | 129299574 | 129299762 | AIFM1  | NM_004208    | 16 | 16 | 1     | 106     | 513  | 21079  | 111,53 | 53,8       |
| chrX | 132670052 | 132670350 | GPC3   | NM_001164617 | 9  | 9  | 9     | 170     | 635  | 27377  | 91,56  | 100        |
| chrX | 132730379 | 132730603 | GPC3   | NM_001164617 | 9  | 9  | 8     | 160     | 945  | 40993  | 182,19 | 85         |
| chrX | 132795741 | 132795941 | GPC3   | NM_001164617 | 9  | 9  | 7     | 121     | 367  | 15741  | 78,31  | 100        |
| chrX | 132826343 | 132826564 | GPC3   | NM_001164617 | 9  | 9  | 6     | 126     | 253  | 11070  | 49,86  | 100        |
| chrX | 132833844 | 132834041 | GPC3   | NM_001164617 | 9  | 9  | 5     | 134     | 17   | 740    | 3,74   | 88,8       |
| chrX | 132838193 | 132838399 | GPC3   | NM_001164617 | 9  | 9  | 4     | 69      | 311  | 13199  | 63,76  | 100        |
| chrX | 132887545 | 132888222 | GPC3   | NM_001164617 | 9  | 9  | 3     | 695     | 1885 | 88327  | 130,28 | 94,8       |
| chrX | 133087069 | 133087263 | GPC3   | NM_001164617 | 9  | 9  | 2     | 162     | 757  | 33328  | 170,91 | 100        |
| chrX | 133119330 | 133119533 | GPC3   | NM_001164617 | 9  | 9  | 1     | 175     | 8    | 333    | 1,63   | 84         |
| chrX | 133511573 | 133511764 | PHF6   | NM_032458    | 10 | 9  | 2     | 138     | 177  | 7760   | 40,42  | 84,8       |
| chrX | 133512027 | 133512200 | PHF6   | NM_032458    | 10 | 9  | 3     | 102     | 148  | 6596   | 37,91  | 100        |
| chrX | 133527479 | 133527667 | PHF6   | NM_032458    | 10 | 9  | 4     | 134     | 305  | 13290  | 70,32  | 100        |
| chrX | 133527863 | 133528057 | PHF6   | NM_032458    | 10 | 9  | 5     | 44      | 314  | 12282  | 62,98  | 100        |
| chrX | 133547559 | 133548079 | PHF6   | NM_032458    | 10 | 9  | 6,7   | 167.144 | 833  | 40012  | 76,8   | 77.2,100.0 |
| chrX | 133548982 | 133549256 | PHF6   | NM_032458    | 10 | 9  | 8     | 105     | 420  | 17605  | 64,02  | 100        |
| chrX | 133551203 | 133551477 | PHF6   | NM_032458    | 10 | 9  | 9     | 134     | 599  | 28117  | 102,24 | 97         |

|      |           |           |         |              |    |    |     |        |      |       |        |             |
|------|-----------|-----------|---------|--------------|----|----|-----|--------|------|-------|--------|-------------|
| chrX | 133559143 | 133559500 | PHF6    | NM_032458    | 10 | 9  | 10  | 130    | 600  | 28418 | 79,38  | 100         |
| chrX | 133594182 | 133594376 | HPRT1   | NM_000194    | 9  | 9  | 1   | 27     | 18   | 763   | 3,91   | 100         |
| chrX | 133607377 | 133607565 | HPRT1   | NM_000194    | 9  | 9  | 2   | 107    | 169  | 7136  | 37,76  | 100         |
| chrX | 133609259 | 133609471 | HPRT1   | NM_000194    | 9  | 9  | 3   | 184    | 164  | 7293  | 34,24  | 73,9        |
| chrX | 133620509 | 133620718 | HPRT1   | NM_000194    | 9  | 9  | 4   | 66     | 137  | 6154  | 29,3   | 78,8        |
| chrX | 133624195 | 133624389 | HPRT1   | NM_000194    | 9  | 9  | 5   | 18     | 136  | 6201  | 31,8   | 100         |
| chrX | 133627493 | 133627681 | HPRT1   | NM_000194    | 9  | 9  | 6   | 83     | 359  | 15242 | 80,65  | 100         |
| chrX | 133632354 | 133632661 | HPRT1   | NM_000194    | 9  | 9  | 7,8 | 47,77  | 290  | 13224 | 42,94  | 100,0,31.2  |
| chrX | 133634076 | 133634270 | HPRT1   | NM_000194    | 9  | 9  | 9   | 48     | 249  | 11299 | 57,94  | 66,7        |
| chrX | 135067657 | 135068029 | SLC9A6  | NM_001042537 | 16 | 16 | 1   | 325    | 1024 | 47704 | 127,89 | 100         |
| chrX | 135076887 | 135077084 | SLC9A6  | NM_001042537 | 16 | 16 | 2   | 200    | 252  | 10827 | 54,68  | 70          |
| chrX | 135080274 | 135080462 | SLC9A6  | NM_001042537 | 16 | 16 | 3   | 78     | 76   | 2906  | 15,38  | 91          |
| chrX | 135080563 | 135080754 | SLC9A6  | NM_001042537 | 16 | 16 | 4   | 77     | 140  | 5459  | 28,43  | 100         |
| chrX | 135080985 | 135081170 | SLC9A6  | NM_001042537 | 16 | 16 | 5   | 113    | 316  | 12516 | 67,29  | 100         |
| chrX | 135084249 | 135084437 | SLC9A6  | NM_001042537 | 16 | 16 | 6   | 106    | 652  | 27223 | 144,04 | 100         |
| chrX | 135092541 | 135092756 | SLC9A6  | NM_001042537 | 16 | 16 | 7   | 142    | 1031 | 45079 | 208,7  | 100         |
| chrX | 135095003 | 135095185 | SLC9A6  | NM_001042537 | 16 | 16 | 8   | 106    | 265  | 11408 | 62,34  | 73,6        |
| chrX | 135095427 | 135095627 | SLC9A6  | NM_001042537 | 16 | 16 | 9   | 89     | 333  | 12981 | 64,58  | 100         |
| chrX | 135098769 | 135098945 | SLC9A6  | NM_001042537 | 16 | 16 | 10  | 114    | 166  | 7104  | 40,14  | 100         |
| chrX | 135104763 | 135104963 | SLC9A6  | NM_001042537 | 16 | 16 | 11  | 112    | 448  | 18237 | 90,73  | 83,9        |
| chrX | 135106501 | 135106683 | SLC9A6  | NM_001042537 | 16 | 16 | 12  | 154    | 278  | 11776 | 64,35  | 92,2        |
| chrX | 135112250 | 135112480 | SLC9A6  | NM_001042537 | 16 | 16 | 13  | 31     | 632  | 24268 | 105,06 | 100         |
| chrX | 135115521 | 135115697 | SLC9A6  | NM_001042537 | 16 | 16 | 14  | 80     | 136  | 5412  | 30,58  | 100         |
| chrX | 135122262 | 135122432 | SLC9A6  | NM_001042537 | 16 | 16 | 15  | 106    | 32   | 1438  | 8,41   | 74,5        |
| chrX | 135126625 | 135126985 | SLC9A6  | NM_001042537 | 16 | 16 | 16  | 273    | 1161 | 54373 | 150,62 | 94,9        |
| chrX | 135750042 | 135750387 | ARHGEF6 | NM_004840    | 22 | 22 | 22  | 141    | 1149 | 55302 | 159,83 | 100         |
| chrX | 135751579 | 135751758 | ARHGEF6 | NM_004840    | 22 | 22 | 21  | 55     | 449  | 20083 | 111,57 | 100         |
| chrX | 135754167 | 135754370 | ARHGEF6 | NM_004840    | 22 | 22 | 20  | 100    | 376  | 16881 | 82,75  | 100         |
| chrX | 135757071 | 135757292 | ARHGEF6 | NM_004840    | 22 | 22 | 19  | 90     | 362  | 16334 | 73,58  | 100         |
| chrX | 135758744 | 135758920 | ARHGEF6 | NM_004840    | 22 | 22 | 18  | 94     | 349  | 13577 | 76,71  | 100         |
| chrX | 135759977 | 135760165 | ARHGEF6 | NM_004840    | 22 | 22 | 17  | 21     | 595  | 24787 | 131,15 | 100         |
| chrX | 135761611 | 135761787 | ARHGEF6 | NM_004840    | 22 | 22 | 16  | 126    | 327  | 13934 | 78,72  | 74,6        |
| chrX | 135762847 | 135763071 | ARHGEF6 | NM_004840    | 22 | 22 | 15  | 146    | 1149 | 49261 | 218,94 | 100         |
| chrX | 135764008 | 135764217 | ARHGEF6 | NM_004840    | 22 | 22 | 14  | 79     | 597  | 25137 | 119,7  | 100         |
| chrX | 135764850 | 135765047 | ARHGEF6 | NM_004840    | 22 | 22 | 13  | 87     | 354  | 14789 | 74,69  | 100         |
| chrX | 135767835 | 135768035 | ARHGEF6 | NM_004840    | 22 | 22 | 12  | 147    | 2074 | 91697 | 456,2  | 100         |
| chrX | 135770086 | 135770286 | ARHGEF6 | NM_004840    | 22 | 22 | 11  | 60     | 328  | 14304 | 71,16  | 100         |
| chrX | 135772740 | 135772922 | ARHGEF6 | NM_004840    | 22 | 22 | 10  | 139    | 440  | 17714 | 96,8   | 100         |
| chrX | 135789030 | 135789215 | ARHGEF6 | NM_004840    | 22 | 22 | 9   | 123    | 354  | 14914 | 80,18  | 100         |
| chrX | 135790775 | 135790966 | ARHGEF6 | NM_004840    | 22 | 22 | 8   | 96     | 971  | 41999 | 218,74 | 100         |
| chrX | 135795396 | 135795566 | ARHGEF6 | NM_004840    | 22 | 22 | 7   | 95     | 350  | 13868 | 81,1   | 100         |
| chrX | 135814210 | 135814398 | ARHGEF6 | NM_004840    | 22 | 22 | 6   | 71     | 227  | 9360  | 49,52  | 100         |
| chrX | 135825816 | 135826001 | ARHGEF6 | NM_004840    | 22 | 22 | 5   | 202    | 576  | 24965 | 134,22 | 64,4        |
| chrX | 135827337 | 135827558 | ARHGEF6 | NM_004840    | 22 | 22 | 4   | 125    | 842  | 36477 | 164,31 | 100         |
| chrX | 135829590 | 135829772 | ARHGEF6 | NM_004840    | 22 | 22 | 3   | 85     | 229  | 9927  | 54,25  | 100         |
| chrX | 135861502 | 135861723 | ARHGEF6 | NM_004840    | 22 | 22 | 2   | 84     | 276  | 12134 | 54,66  | 100         |
| chrX | 135862923 | 135863108 | ARHGEF6 | NM_004840    | 22 | 22 | 1   | 165    | 546  | 22322 | 120,01 | 72,1        |
| chrX | 139585804 | 139586727 | SOX3    | NM_005634    | 1  | 1  | 1   | 1341   | 615  | 27873 | 30,17  | 62,9        |
| chrX | 139586785 | 139587234 | SOX3    | NM_005634    | 1  | 1  | 1   | 1341   | 205  | 8200  | 18,22  | 32,9        |
| chrX | 146993623 | 146993808 | FMR1    | NM_002024    | 17 | 17 | 1   | 51     | 87   | 3536  | 19,01  | 100         |
| chrX | 147003421 | 147003648 | FMR1    | NM_002024    | 17 | 17 | 2   | 53     | 193  | 8011  | 35,14  | 100         |
| chrX | 147006962 | 147007171 | FMR1    | NM_002024    | 17 | 17 | 3   | 94     | 306  | 13518 | 64,37  | 100         |
| chrX | 147009805 | 147009990 | FMR1    | NM_002024    | 17 | 17 | 4   | 72     | 193  | 7870  | 42,31  | 100         |
| chrX | 147010192 | 147010374 | FMR1    | NM_002024    | 17 | 17 | 5   | 149    | 350  | 15282 | 83,51  | 89,9        |
| chrX | 147011861 | 147011836 | FMR1    | NM_002024    | 17 | 17 | 6,7 | 94.117 | 885  | 40640 | 108,09 | 100,0,100.0 |
| chrX | 147013896 | 147014262 | FMR1    | NM_002024    | 17 | 17 | 8,9 | 171,79 | 912  | 42807 | 116,64 | 100,0,74.7  |
| chrX | 147017983 | 147018174 | FMR1    | NM_002024    | 17 | 17 | 10  | 110    | 210  | 9304  | 48,46  | 100         |

|      |           |           |        |              |    |    |                |                     |      |        |        |                              |
|------|-----------|-----------|--------|--------------|----|----|----------------|---------------------|------|--------|--------|------------------------------|
| chrX | 147018930 | 147019121 | FMR1   | NM_002024    | 17 | 17 | 11             | 135                 | 261  | 10891  | 56,72  | 100                          |
| chrX | 147019512 | 147019724 | FMR1   | NM_002024    | 17 | 17 | 12             | 63                  | 202  | 8712   | 40,9   | 100                          |
| chrX | 147021986 | 147022186 | FMR1   | NM_002024    | 17 | 17 | 13             | 87                  | 437  | 18340  | 91,24  | 100                          |
| chrX | 147024627 | 147024812 | FMR1   | NM_002024    | 17 | 17 | 14             | 196                 | 404  | 17283  | 92,92  | 82,7                         |
| chrX | 147026331 | 147026504 | FMR1   | NM_002024    | 17 | 17 | 15             | 183                 | 244  | 9592   | 55,13  | 63,4                         |
| chrX | 147026994 | 147027191 | FMR1   | NM_002024    | 17 | 17 | 16             | 83                  | 242  | 10802  | 54,56  | 100                          |
| chrX | 147030166 | 147030440 | FMR1   | NM_002024    | 17 | 17 | 17             | 162                 | 1153 | 53403  | 194,19 | 100                          |
| chrX | 147582439 | 147582737 | AFF2   | NM_002025    | 21 | 21 | 1              | 47                  | 248  | 10665  | 35,67  | 100                          |
| chrX | 147733305 | 147733677 | AFF2   | NM_002025    | 21 | 21 | 2              | 133                 | 328  | 14956  | 40,1   | 100                          |
| chrX | 147743353 | 147744303 | AFF2   | NM_002025    | 21 | 21 | 3              | 861                 | 5938 | 287422 | 302,23 | 100                          |
| chrX | 147891327 | 147891512 | AFF2   | NM_002025    | 21 | 21 | 4              | 45                  | 142  | 6165   | 33,15  | 100                          |
| chrX | 147919110 | 147919313 | AFF2   | NM_002025    | 21 | 21 | 5              | 87                  | 517  | 22999  | 112,74 | 100                          |
| chrX | 147924407 | 147924607 | AFF2   | NM_002025    | 21 | 21 | 6              | 37                  | 630  | 25889  | 128,8  | 100                          |
| chrX | 147924885 | 147925091 | AFF2   | NM_002025    | 21 | 21 | 7              | 52                  | 191  | 8505   | 41,09  | 100                          |
| chrX | 147967309 | 147967491 | AFF2   | NM_002025    | 21 | 21 | 8              | 97                  | 1190 | 50448  | 275,67 | 75,3                         |
| chrX | 147985673 | 147985867 | AFF2   | NM_002025    | 21 | 21 | 9              | 38                  | 71   | 3218   | 16,5   | 100                          |
| chrX | 148035014 | 148035244 | AFF2   | NM_002025    | 21 | 21 | 10             | 160                 | 915  | 38830  | 168,1  | 84,4                         |
| chrX | 148037092 | 148038077 | AFF2   | NM_002025    | 21 | 21 | 11             | 1011                | 6092 | 297535 | 301,76 | 93,5                         |
| chrX | 148039782 | 148039952 | AFF2   | NM_002025    | 21 | 21 | 12             | 122                 | 884  | 37549  | 219,58 | 70,5                         |
| chrX | 148044200 | 148044468 | AFF2   | NM_002025    | 21 | 21 | 13             | 223                 | 463  | 21033  | 78,19  | 100                          |
| chrX | 148048258 | 148048538 | AFF2   | NM_002025    | 21 | 21 | 14             | 290                 | 3252 | 150961 | 537,23 | 75,5                         |
| chrX | 148049156 | 148049362 | AFF2   | NM_002025    | 21 | 21 | 15             | 64                  | 445  | 19779  | 95,55  | 100                          |
| chrX | 148054995 | 148055213 | AFF2   | NM_002025    | 21 | 21 | 16             | 137                 | 1482 | 64930  | 296,48 | 100                          |
| chrX | 148059338 | 148059523 | AFF2   | NM_002025    | 21 | 21 | 17             | 72                  | 347  | 14515  | 78,04  | 84,7                         |
| chrX | 148059793 | 148059987 | AFF2   | NM_002025    | 21 | 21 | 18             | 94                  | 1354 | 60099  | 308,2  | 100                          |
| chrX | 148062241 | 148062468 | AFF2   | NM_002025    | 21 | 21 | 19             | 53                  | 200  | 8787   | 38,54  | 100                          |
| chrX | 148068966 | 148069160 | AFF2   | NM_002025    | 21 | 21 | 20             | 191                 | 743  | 33403  | 171,3  | 63,9                         |
| chrX | 148072650 | 148072945 | AFF2   | NM_002025    | 21 | 21 | 21             | 122                 | 698  | 30836  | 104,18 | 100                          |
| chrX | 148564181 | 148564790 | IDS    | NM_000202    | 9  | 9  | 9              | 473                 | 2172 | 105231 | 172,51 | 100                          |
| chrX | 148568393 | 148568842 | IDS    | NM_000202    | 9  | 9  | 8              | 174                 | 705  | 33485  | 74,41  | 100                          |
| chrX | 148571882 | 148572067 | IDS    | NM_000202    | 9  | 9  | 7              | 127                 | 598  | 24259  | 130,42 | 70,9                         |
| chrX | 148577801 | 148577989 | IDS    | NM_000202    | 9  | 9  | 6              | 171                 | 509  | 22046  | 116,65 | 66,1                         |
| chrX | 148579685 | 148579912 | IDS    | NM_000202    | 9  | 9  | 5              | 201                 | 618  | 27328  | 119,86 | 76,6                         |
| chrX | 148582417 | 148582623 | IDS    | NM_000202    | 9  | 9  | 4              | 89                  | 431  | 18652  | 90,11  | 100                          |
| chrX | 148585714 | 148585905 | IDS    | NM_000202    | 9  | 9  | 2              | 137                 | 279  | 11099  | 57,81  | 80,3                         |
| chrX | 148586500 | 148586786 | IDS    | NM_000202    | 9  | 9  | 1              | 103                 | 113  | 5009   | 17,45  | 100                          |
| chrX | 152014735 | 152014929 | NSDHL  | NM_001129765 | 9  | 7  | 3              | 108                 | 215  | 9467   | 48,55  | 56,5                         |
| chrX | 152018799 | 152018996 | NSDHL  | NM_001129765 | 9  | 7  | 4              | 159                 | 147  | 6034   | 30,47  | 100                          |
| chrX | 152027244 | 152027447 | NSDHL  | NM_001129765 | 9  | 7  | 5              | 147                 | 352  | 14843  | 72,76  | 91,2                         |
| chrX | 152031139 | 152031339 | NSDHL  | NM_001129765 | 9  | 7  | 6              | 129                 | 632  | 28932  | 143,94 | 100                          |
| chrX | 152034387 | 152034605 | NSDHL  | NM_001129765 | 9  | 7  | 7              | 143                 | 897  | 39593  | 180,79 | 83,2                         |
| chrX | 152036011 | 152036205 | NSDHL  | NM_001129765 | 9  | 7  | 8              | 103                 | 275  | 11665  | 59,82  | 88,3                         |
| chrX | 152037296 | 152037748 | NSDHL  | NM_001129765 | 9  | 7  | 9              | 333                 | 2826 | 128605 | 283,9  | 100                          |
| chrX | 152953948 | 152954068 | SLC6A8 | NM_005629    | 13 | 13 | 1              | 262                 | 0    | 0      | 0      | 14,9                         |
| chrX | 152958610 | 152958780 | SLC6A8 | NM_005629    | 13 | 13 | 5,6            | 135.104             | 170  | 6035   | 35,29  | 15,6,60.6                    |
| chrX | 152960037 | 152960207 | SLC6A8 | NM_005629    | 13 | 13 | 11,12          | 101.171             | 13   | 427    | 2,5    | 51.5,19.9                    |
| chrX | 152990603 | 152991680 | ABCD1  | NM_000033    | 10 | 10 | 1              | 900                 | 681  | 32354  | 30,01  | 100                          |
| chrX | 152994683 | 152995126 | ABCD1  | NM_000033    | 10 | 10 | 2              | 181                 | 585  | 26680  | 60,09  | 100                          |
| chrX | 153001492 | 153001926 | ABCD1  | NM_000033    | 10 | 10 | 3,4            | 143.169             | 782  | 35812  | 82,33  | 100,0,75.7                   |
| chrX | 153002539 | 153002715 | ABCD1  | NM_000033    | 10 | 10 | 5              | 95                  | 208  | 8975   | 50,71  | 100                          |
| chrX | 153005581 | 153005790 | ABCD1  | NM_000033    | 10 | 10 | 6              | 146                 | 311  | 12449  | 59,28  | 76                           |
| chrX | 153009159 | 153009279 | ABCD1  | NM_000033    | 10 | 10 | 10             | 247                 | 15   | 680    | 5,62   | 12,6                         |
| chrX | 153128007 | 153128308 | L1CAM  | NM_000425    | 28 | 28 | 28             | 232                 | 671  | 30101  | 99,67  | 82,3                         |
| chrX | 153128840 | 153129049 | L1CAM  | NM_000425    | 28 | 28 | 26             | 73                  | 161  | 6880   | 32,76  | 100                          |
| chrX | 153129313 | 153129489 | L1CAM  | NM_000425    | 28 | 28 | 25             | 135                 | 38   | 1568   | 8,86   | 100                          |
| chrX | 153129784 | 153131003 | L1CAM  | NM_000425    | 28 | 28 | 24,23,22,21,20 | 156.120.174.123.202 | 1662 | 77868  | 63,83  | 95.5,100.0,100.0,100.0,100.0 |
| chrX | 153131191 | 153131391 | L1CAM  | NM_000425    | 28 | 28 | 19             | 116                 | 208  | 8420   | 41,89  | 72,4                         |

|      |           |           |       |              |    |    |                      |                             |      |        |        |                                          |
|------|-----------|-----------|-------|--------------|----|----|----------------------|-----------------------------|------|--------|--------|------------------------------------------|
| chrX | 153132096 | 153132622 | L1CAM | NM_000425    | 28 | 28 | 18,17                | 223,71                      | 923  | 43402  | 82,36  | 100.0,100.0                              |
| chrX | 153132863 | 153133060 | L1CAM | NM_000425    | 28 | 28 | 16                   | 198                         | 223  | 9142   | 46,17  | 73,7                                     |
| chrX | 153133316 | 153134455 | L1CAM | NM_000425    | 28 | 28 | 15,14,13,12,11       | 111.125.157.167.112         | 3400 | 166233 | 145,82 | 45.0,100.0,100.0,100.0,100.0             |
| chrX | 153135024 | 153136036 | L1CAM | NM_000425    | 28 | 28 | 10,9,8,7             | 144.132.185.112             | 1791 | 83918  | 82,84  | 66.0,100.0,100.0,100.0                   |
| chrX | 153136204 | 153136629 | L1CAM | NM_000425    | 28 | 28 | 6,5                  | 171.123                     | 530  | 24276  | 56,99  | 100.0,95.9                               |
| chrX | 153137613 | 153137792 | L1CAM | NM_000425    | 28 | 28 | 4                    | 203                         | 262  | 10998  | 61,1   | 88,7                                     |
| chrX | 153137939 | 153138154 | L1CAM | NM_000425    | 28 | 28 | 3                    | 106                         | 497  | 20907  | 96,79  | 100                                      |
| chrX | 153138628 | 153138807 | L1CAM | NM_000425    | 28 | 28 | 2                    | 15                          | 168  | 7191   | 39,95  | 100                                      |
| chrX | 153141044 | 153141386 | L1CAM | NM_000425    | 28 | 28 | 1                    | 76                          | 192  | 9098   | 26,52  | 100                                      |
| chrX | 153195332 | 153195701 | NAA10 | NM_003491    | 8  | 8  | 8                    | 237                         | 367  | 17130  | 46,3   | 100                                      |
| chrX | 153196221 | 153196433 | NAA10 | NM_003491    | 8  | 8  | 7                    | 85                          | 451  | 19847  | 93,18  | 94,1                                     |
| chrX | 153197430 | 153197606 | NAA10 | NM_003491    | 8  | 8  | 6                    | 45                          | 258  | 11419  | 64,51  | 100                                      |
| chrX | 153197725 | 153198011 | NAA10 | NM_003491    | 8  | 8  | 5,4                  | 116,46                      | 548  | 25420  | 88,57  | 100.0,43.5                               |
| chrX | 153199282 | 153199488 | NAA10 | NM_003491    | 8  | 8  | 3                    | 59                          | 116  | 5211   | 25,17  | 100                                      |
| chrX | 153199763 | 153199966 | NAA10 | NM_003491    | 8  | 8  | 2                    | 99                          | 330  | 14005  | 68,65  | 100                                      |
| chrX | 153214751 | 153215111 | HCFC1 | NM_005334    | 26 | 26 | 26,25                | 40,64                       | 729  | 34303  | 95,02  | 100.0,100.0                              |
| chrX | 153215708 | 153216095 | HCFC1 | NM_005334    | 26 | 26 | 24                   | 301                         | 491  | 21708  | 55,95  | 95,3                                     |
| chrX | 153216262 | 153216471 | HCFC1 | NM_005334    | 26 | 26 | 23                   | 186                         | 179  | 7945   | 37,83  | 100                                      |
| chrX | 153216737 | 153217565 | HCFC1 | NM_005334    | 26 | 26 | 22,21,20             | 138.119.318                 | 782  | 35569  | 42,91  | 100.0,100.0,86.2                         |
| chrX | 153217987 | 153218569 | HCFC1 | NM_005334    | 26 | 26 | 19                   | 445                         | 520  | 24083  | 41,31  | 95,1                                     |
| chrX | 153219051 | 153219233 | HCFC1 | NM_005334    | 26 | 26 | 18                   | 164                         | 122  | 5014   | 27,4   | 100                                      |
| chrX | 153219589 | 153221066 | HCFC1 | NM_005334    | 26 | 26 | 17                   | 1477                        | 1167 | 54433  | 36,83  | 95,1                                     |
| chrX | 153221680 | 153221960 | HCFC1 | NM_005334    | 26 | 26 | 16                   | 221                         | 91   | 3775   | 13,43  | 82,8                                     |
| chrX | 153222148 | 153222588 | HCFC1 | NM_005334    | 26 | 26 | 15,14                | 139.143                     | 411  | 18239  | 41,36  | 48.2,100.0                               |
| chrX | 153222659 | 153222960 | HCFC1 | NM_005334    | 26 | 26 | 13                   | 220                         | 418  | 18266  | 60,48  | 89,1                                     |
| chrX | 153223191 | 153223699 | HCFC1 | NM_005334    | 26 | 26 | 12,11                | 105.225                     | 760  | 33244  | 65,31  | 100.0,99.6                               |
| chrX | 153223949 | 153224158 | HCFC1 | NM_005334    | 26 | 26 | 10                   | 198                         | 534  | 24476  | 116,55 | 70,2                                     |
| chrX | 153224833 | 153225006 | HCFC1 | NM_005334    | 26 | 26 | 9                    | 161                         | 263  | 11261  | 64,72  | 68,3                                     |
| chrX | 153225276 | 153225873 | HCFC1 | NM_005334    | 26 | 26 | 8,7                  | 360.180                     | 328  | 14543  | 24,32  | 93.6,100.0                               |
| chrX | 153227020 | 153227199 | HCFC1 | NM_005334    | 26 | 26 | 6                    | 107                         | 566  | 23862  | 132,57 | 74,8                                     |
| chrX | 153227668 | 153227868 | HCFC1 | NM_005334    | 26 | 26 | 5                    | 85                          | 961  | 43262  | 215,23 | 100                                      |
| chrX | 153228724 | 153228915 | HCFC1 | NM_005334    | 26 | 26 | 4                    | 209                         | 487  | 21428  | 111,6  | 77                                       |
| chrX | 153229491 | 153229679 | HCFC1 | NM_005334    | 26 | 26 | 3                    | 161                         | 154  | 6446   | 34,11  | 65,2                                     |
| chrX | 153229951 | 153230142 | HCFC1 | NM_005334    | 26 | 26 | 2                    | 149                         | 422  | 18264  | 95,13  | 76,5                                     |
| chrX | 153236052 | 153236362 | HCFC1 | NM_005334    | 26 | 26 | 1                    | 193                         | 231  | 9861   | 31,71  | 100                                      |
| chrX | 153295728 | 153296918 | MECP2 | NM_001110792 | 3  | 3  | 3                    | 1084                        | 3007 | 142152 | 119,36 | 100                                      |
| chrX | 153297637 | 153298024 | MECP2 | NM_001110792 | 3  | 3  | 2                    | 351                         | 707  | 33373  | 86,01  | 100                                      |
| chrX | 153363048 | 153363239 | MECP2 | NM_001110792 | 3  | 3  | 1                    | 62                          | 13   | 518    | 2,7    | 100                                      |
| chrX | 153576897 | 153577355 | FLNA  | NM_001110556 | 48 | 47 | 48                   | 188                         | 347  | 15154  | 33,02  | 73,9                                     |
| chrX | 153577777 | 153578599 | FLNA  | NM_001110556 | 48 | 47 | 47,46,45             | 204.219.177                 | 1034 | 48993  | 59,53  | 77.0,100.0,100.0                         |
| chrX | 153579278 | 153579478 | FLNA  | NM_001110556 | 48 | 47 | 44                   | 133                         | 96   | 4312   | 21,45  | 99,2                                     |
| chrX | 153579978 | 153580157 | FLNA  | NM_001110556 | 48 | 47 | 43                   | 116                         | 400  | 16697  | 92,76  | 75                                       |
| chrX | 153580200 | 153582080 | FLNA  | NM_001110556 | 48 | 47 | 42,41,40,39,38,37,36 | 138.267.123.153.204.000.000 | 2708 | 125270 | 66,6   | 100.0,100.0,100.0,100.0,100.0,100.0,91.4 |
| chrX | 153582284 | 153583432 | FLNA  | NM_001110556 | 48 | 47 | 35,34,33,32,31       | 129.141.103.96,248          | 1653 | 78165  | 68,03  | 99.2,100.0,100.0,100.0,96.8              |
| chrX | 153585670 | 153586036 | FLNA  | NM_001110556 | 48 | 47 | 29                   | 190                         | 872  | 42044  | 114,56 | 100                                      |
| chrX | 153586646 | 153586991 | FLNA  | NM_001110556 | 48 | 47 | 28,27                | 157.124                     | 687  | 31567  | 91,23  | 49.7,100.0                               |
| chrX | 153587261 | 153588901 | FLNA  | NM_001110556 | 48 | 47 | 26,25,24,23,22       | 171.161.163.174.598         | 2153 | 100346 | 61,15  | 100.0,100.0,100.0,100.0,91.0             |
| chrX | 153589685 | 153590205 | FLNA  | NM_001110556 | 48 | 47 | 21,20                | 263.118                     | 2067 | 99094  | 190,2  | 96.6,100.0                               |
| chrX | 153590314 | 153591154 | FLNA  | NM_001110556 | 48 | 47 | 19,18,17,16          | 170.91,161,124              | 967  | 45371  | 53,95  | 100.0,100.0,100.0,100.0                  |
| chrX | 153592318 | 153593807 | FLNA  | NM_001110556 | 48 | 47 | 15,14,13,12,11,10    | 144.114.194.137.124.000     | 2751 | 129929 | 87,2   | 100.0,100.0,100.0,100.0,100.0,65.9       |
| chrX | 153594447 | 153595272 | FLNA  | NM_001110556 | 48 | 47 | 9,8,7,6              | 201.163,78,119              | 1037 | 47895  | 57,98  | 72.6,100.0,100.0,100.0                   |
| chrX | 153595696 | 153596376 | FLNA  | NM_001110556 | 48 | 47 | 5,4,3                | 148,98,249                  | 1224 | 53194  | 78,11  | 100.0,100.0,67.1                         |
| chrX | 153599253 | 153599441 | FLNA  | NM_001110556 | 48 | 47 | 2                    | 373                         | 459  | 19710  | 104,29 | 50,7                                     |
| chrX | 153599508 | 153599693 | FLNA  | NM_001110556 | 48 | 47 | 2                    | 373                         | 92   | 2473   | 13,3   | 28,4                                     |
| chrX | 153665453 | 153665730 | GDI1  | NM_001493    | 11 | 11 | 1                    | 45                          | 21   | 921    | 3,31   | 100                                      |
| chrX | 153666519 | 153667454 | GDI1  | NM_001493    | 11 | 11 | 2,3,4                | 108.100.135                 | 2022 | 97341  | 104    | 100.0,100.0,76.3                         |
| chrX | 153668008 | 153668427 | GDI1  | NM_001493    | 11 | 11 | 5                    | 199                         | 1699 | 78113  | 185,98 | 70,4                                     |

|      |           |           |        |              |    |    |         |            |      |        |        |                   |
|------|-----------|-----------|--------|--------------|----|----|---------|------------|------|--------|--------|-------------------|
| chrX | 153668756 | 153668959 | GDI1   | NM_001493    | 11 | 11 | 6       | 132        | 1361 | 61146  | 299,74 | 74,2              |
| chrX | 153669389 | 153669583 | GDI1   | NM_001493    | 11 | 11 | 7       | 100        | 125  | 5120   | 26,26  | 100               |
| chrX | 153670024 | 153670212 | GDI1   | NM_001493    | 11 | 11 | 8       | 172        | 759  | 35902  | 189,96 | 68,6              |
| chrX | 153670374 | 153671149 | GDI1   | NM_001493    | 11 | 11 | 9,10,11 | 145,55,153 | 3865 | 181373 | 233,73 | 100.0,100.0,100.0 |
| chrX | 153770468 | 153770656 | IKBKG  | NM_001099856 | 10 | 10 | 1       | 189        | 1058 | 44589  | 235,92 | 94,2              |
| chrX | 153780135 | 153780332 | IKBKG  | NM_001099856 | 10 | 10 | 2       | 202        | 671  | 29547  | 149,23 | 64,4              |
| chrX | 153993044 | 153993256 | DKC1   | NM_001363    | 15 | 15 | 2       | 68         | 294  | 13529  | 63,52  | 100               |
| chrX | 153993670 | 153993858 | DKC1   | NM_001363    | 15 | 15 | 3       | 87         | 538  | 22976  | 121,57 | 100               |
| chrX | 153994067 | 153994279 | DKC1   | NM_001363    | 15 | 15 | 4       | 92         | 274  | 11757  | 55,2   | 100               |
| chrX | 153994446 | 153994667 | DKC1   | NM_001363    | 15 | 15 | 5       | 185        | 227  | 9623   | 43,35  | 95,7              |
| chrX | 153995140 | 153995334 | DKC1   | NM_001363    | 15 | 15 | 6       | 65         | 251  | 10936  | 56,08  | 96,9              |
| chrX | 153995535 | 153995720 | DKC1   | NM_001363    | 15 | 15 | 7       | 127        | 205  | 8134   | 43,73  | 96,9              |
| chrX | 153996449 | 153996883 | DKC1   | NM_001363    | 15 | 15 | 8       | 131        | 2632 | 124325 | 285,8  | 100               |
| chrX | 153997398 | 153997622 | DKC1   | NM_001363    | 15 | 15 | 9       | 144        | 404  | 17810  | 79,16  | 100               |
| chrX | 153999008 | 153999181 | DKC1   | NM_001363    | 15 | 15 | 10      | 121        | 47   | 2164   | 12,44  | 100               |
| chrX | 154001319 | 154001495 | DKC1   | NM_001363    | 15 | 15 | 11      | 119        | 326  | 15071  | 85,15  | 75,6              |
| chrX | 154002792 | 154003001 | DKC1   | NM_001363    | 15 | 15 | 12      | 104        | 579  | 25981  | 123,72 | 100               |
| chrX | 154003280 | 154003542 | DKC1   | NM_001363    | 15 | 15 | 13      | 79         | 392  | 18020  | 68,52  | 92,4              |
| chrX | 154004370 | 154004558 | DKC1   | NM_001363    | 15 | 15 | 14      | 138        | 358  | 15129  | 80,05  | 70,3              |
| chrX | 154005030 | 154005298 | DKC1   | NM_001363    | 15 | 15 | 15      | 69         | 391  | 17340  | 64,46  | 100               |
| chrX | 154489968 | 154490577 | RAB39B | NM_171998    | 2  | 2  | 2       | 427        | 1816 | 88514  | 145,1  | 100               |
| chrX | 154493385 | 154493650 | RAB39B | NM_171998    | 2  | 2  | 1       | 215        | 443  | 20621  | 77,52  | 87,9              |
|      |           |           |        |              |    |    |         |            |      | Median | 75,215 | 98,6              |
